# Supplementary material for: Expanding the antibacterial selectivity of polyether ionophore antibiotics through diversity-focused semisynthesis
Source: Springer Nature journal article supplement (doi:10.1038/s41557-020-00601-1), 2020-12-22
Supplement: 41557_2020_601_MOESM31_ESM.cif [file 41557_2020_601_MOESM31_ESM.cif]

data_2017_12_04cold_0m
_audit_creation_date              2017-12-05
_audit_creation_method
;
Olex2 1.2
(compiled 2017.08.10 svn.r3458 for OlexSys, GUI svn.r5381)
;
_shelx_SHELXL_version_number      '2016/6'
_publ_contact_author_address      ?
_publ_contact_author_email        ?
_publ_contact_author_id_orcid     ?
_publ_contact_author_name         ''
_publ_contact_author_phone        ?
_publ_section_references
;
Dolomanov, O.V., Bourhis, L.J., Gildea, R.J, Howard, J.A.K. & Puschmann, H.
 (2009), J. Appl. Cryst. 42, 339-341.

Sheldrick, G.M. (2015). Acta Cryst. C71, 3-8.
;
_chemical_name_common             ?
_chemical_name_systematic         ?
_chemical_formula_moiety          'C14 H24 O3'
_chemical_formula_sum             'C14 H24 O3'
_chemical_formula_weight          240.33
_chemical_absolute_configuration  syn
_chemical_melting_point           ?
loop_
  _atom_type_symbol
  _atom_type_description
  _atom_type_scat_dispersion_real
  _atom_type_scat_dispersion_imag
  _atom_type_scat_source
 'C' 'C' 0.0015 0.0009 'International Tables Vol C Tables 4.2.6.8 and 6.1.1.4'
 'H' 'H' 0.0000 0.0000 'International Tables Vol C Tables 4.2.6.8 and 6.1.1.4'
 'O' 'O' 0.0056 0.0036 'International Tables Vol C Tables 4.2.6.8 and 6.1.1.4'

_shelx_space_group_comment
;
The symmetry employed for this shelxl refinement is uniquely defined
by the following loop, which should always be used as a source of
symmetry information in preference to the above space-group names.
They are only intended as comments.
;
_space_group_crystal_system       'monoclinic'
_space_group_IT_number            4
_space_group_name_H-M_alt         'P 1 21 1'
_space_group_name_Hall            'P 2yb'
loop_
  _space_group_symop_operation_xyz
 'x, y, z'
 '-x, y+1/2, -z'

_cell_length_a                    8.5919(14)
_cell_length_b                    9.1040(16)
_cell_length_c                    9.6730(17)
_cell_angle_alpha                 90
_cell_angle_beta                  114.391(4)
_cell_angle_gamma                 90
_cell_volume                      689.1(2)
_cell_formula_units_Z             2
_cell_measurement_reflns_used     2759
_cell_measurement_temperature     100
_cell_measurement_theta_max       18.701
_cell_measurement_theta_min       2.54
_shelx_estimated_absorpt_T_max    0.994
_shelx_estimated_absorpt_T_min    0.991
_exptl_absorpt_coefficient_mu     0.050
_exptl_absorpt_correction_T_max   1.0000
_exptl_absorpt_correction_T_min   0.7422
_exptl_absorpt_correction_type    multi-scan
_exptl_absorpt_process_details
'SADABS-2014/5 (Bruker,2014/5) was used for absorption correction. wR2(int) was 0.1264 before and 0.0558 after correction. The Ratio of minimum to maximum transmission is 0.7422. The \l/2 correction factor is 0.00150.'
_exptl_absorpt_special_details    ?
_exptl_crystal_colour             'clear light colourless'
_exptl_crystal_colour_lustre      clear
_exptl_crystal_colour_modifier    light
_exptl_crystal_colour_primary     colourless
_exptl_crystal_density_diffrn     1.158
_exptl_crystal_density_meas       ?
_exptl_crystal_density_method     ?
_exptl_crystal_description        irregular
_exptl_crystal_F_000              264
_exptl_crystal_size_max           0.17
_exptl_crystal_size_mid           0.13
_exptl_crystal_size_min           0.11
_exptl_transmission_factor_max    ?
_exptl_transmission_factor_min    ?
_diffrn_reflns_av_R_equivalents   0.0486
_diffrn_reflns_av_unetI/netI      0.0405
_diffrn_reflns_Laue_measured_fraction_full 1.000
_diffrn_reflns_Laue_measured_fraction_max 0.998
_diffrn_reflns_limit_h_max        10
_diffrn_reflns_limit_h_min        -10
_diffrn_reflns_limit_k_max        11
_diffrn_reflns_limit_k_min        -10
_diffrn_reflns_limit_l_max        11
_diffrn_reflns_limit_l_min        -11
_diffrn_reflns_number             11684
_diffrn_reflns_point_group_measured_fraction_full 1.000
_diffrn_reflns_point_group_measured_fraction_max 0.994
_diffrn_reflns_theta_full         19.665
_diffrn_reflns_theta_max          19.995
_diffrn_reflns_theta_min          1.824
_diffrn_ambient_temperature       100
_diffrn_detector_area_resol_mean  ?
_diffrn_measured_fraction_theta_full 1.000
_diffrn_measured_fraction_theta_max 0.998
_diffrn_measurement_device_type   'Bruker APEX-II CCD'
_diffrn_measurement_method        '\w and \f scans'
_diffrn_radiation_monochromator   graphite
_diffrn_radiation_type            AgK\a
_diffrn_radiation_wavelength      0.56086
_diffrn_source                    ?
_diffrn_special_details           ?
_diffrn_standards_number          0
_reflns_Friedel_coverage          0.867
_reflns_Friedel_fraction_full     1.000
_reflns_Friedel_fraction_max      0.990
_reflns_number_gt                 2308
_reflns_number_total              2616
_reflns_special_details
;
 Reflections were merged by SHELXL according to the crystal
 class for the calculation of statistics and refinement.
 
 _reflns_Friedel_fraction is defined as the number of unique
 Friedel pairs measured divided by the number that would be
 possible theoretically, ignoring centric projections and
 systematic absences.
;
_reflns_threshold_expression      'I > 2\s(I)'
_computing_cell_refinement        'SAINT v8.37A (Bruker, 2015)'
_computing_data_collection        ?
_computing_data_reduction         'SAINT v8.37A (Bruker, 2015)'
_computing_molecular_graphics     'Olex2 (Dolomanov et al., 2009)'
_computing_publication_material   'Olex2 (Dolomanov et al., 2009)'
_computing_structure_refinement   'ShelXL (Sheldrick, 2015)'
_computing_structure_solution     ?
_refine_diff_density_max          0.140
_refine_diff_density_min          -0.187
_refine_diff_density_rms          0.041
_refine_ls_abs_structure_details
;
 Flack x determined using 954 quotients [(I+)-(I-)]/[(I+)+(I-)]
 (Parsons, Flack and Wagner, Acta Cryst. B69 (2013) 249-259).
;
_refine_ls_abs_structure_Flack    -0.5(10)
_refine_ls_extinction_coef        .
_refine_ls_extinction_method      none
_refine_ls_goodness_of_fit_ref    1.048
_refine_ls_hydrogen_treatment     constr
_refine_ls_matrix_type            full
_refine_ls_number_parameters      158
_refine_ls_number_reflns          2616
_refine_ls_number_restraints      1
_refine_ls_R_factor_all           0.0511
_refine_ls_R_factor_gt            0.0431
_refine_ls_restrained_S_all       1.047
_refine_ls_shift/su_max           0.000
_refine_ls_shift/su_mean          0.000
_refine_ls_structure_factor_coef  Fsqd
_refine_ls_weighting_details
'w=1/[\s^2^(Fo^2^)+(0.0481P)^2^+0.1895P] where P=(Fo^2^+2Fc^2^)/3'
_refine_ls_weighting_scheme       calc
_refine_ls_wR_factor_gt           0.0979
_refine_ls_wR_factor_ref          0.1030
_refine_special_details           ?
_olex2_refinement_description
;
1. Fixed Uiso
 At 1.2 times of:
  All C(H) groups, All C(H,H) groups
 At 1.5 times of:
  All C(H,H,H) groups
2.a Ternary CH refined with riding coordinates:
 C1(H1), C2(H2), C4(H4), C5(H5), C6(H6)
2.b Secondary CH2 refined with riding coordinates:
 C3(H3A,H3B), C10(H10A,H10B)
2.c Aromatic/amide H refined with riding coordinates:
 C8(H8)
2.d X=CH2 refined with riding coordinates:
 C9(H9A,H9B)
2.e Idealised Me refined as rotating group:
 C7(H7A,H7B,H7C), C12(H12A,H12B,H12C), C13(H13A,H13B,H13C), C14(H14A,H14B,H14C)
;
_atom_sites_solution_hydrogens    geom
_atom_sites_solution_primary      ?
_atom_sites_solution_secondary    ?
loop_
  _atom_site_label
  _atom_site_type_symbol
  _atom_site_fract_x
  _atom_site_fract_y
  _atom_site_fract_z
  _atom_site_U_iso_or_equiv
  _atom_site_adp_type
  _atom_site_occupancy
  _atom_site_site_symmetry_order
  _atom_site_calc_flag
  _atom_site_refinement_flags_posn
  _atom_site_refinement_flags_adp
  _atom_site_refinement_flags_occupancy
  _atom_site_disorder_assembly
  _atom_site_disorder_group
 O1 O 0.3442(2) 0.6001(2) 0.5642(2) 0.0182(4) Uani 1 1 d . . . . .
 O2 O 0.4606(3) 0.5202(3) 0.2948(2) 0.0285(5) Uani 1 1 d . . . . .
 O3 O 0.2697(2) 0.3424(2) 0.2687(2) 0.0235(5) Uani 1 1 d . . . . .
 C1 C 0.2112(3) 0.5297(3) 0.5941(3) 0.0177(6) Uani 1 1 d . . . . .
 H1 H 0.190102 0.430396 0.545662 0.021 Uiso 1 1 calc R . . . .
 C2 C 0.2674(4) 0.5099(4) 0.7644(3) 0.0211(6) Uani 1 1 d . . . . .
 H2 H 0.177092 0.452379 0.780547 0.025 Uiso 1 1 calc R . . . .
 C3 C 0.4323(4) 0.4188(3) 0.8252(3) 0.0218(7) Uani 1 1 d . . . . .
 H3A H 0.475729 0.411159 0.937011 0.026 Uiso 1 1 calc R . . . .
 H3B H 0.406699 0.318323 0.782733 0.026 Uiso 1 1 calc R . . . .
 C4 C 0.5711(4) 0.4866(3) 0.7843(3) 0.0199(7) Uani 1 1 d . . . . .
 H4 H 0.603446 0.583084 0.838133 0.024 Uiso 1 1 calc R . . . .
 C5 C 0.5018(3) 0.5180(3) 0.6141(3) 0.0174(6) Uani 1 1 d . . . . .
 H5 H 0.587129 0.583255 0.598945 0.021 Uiso 1 1 calc R . . . .
 C6 C 0.0507(3) 0.6239(3) 0.5128(3) 0.0210(6) Uani 1 1 d . . . . .
 H6 H 0.079248 0.726316 0.552490 0.025 Uiso 1 1 calc R . . . .
 C7 C -0.0974(4) 0.5719(3) 0.5486(4) 0.0272(7) Uani 1 1 d . . . . .
 H7A H -0.117004 0.466908 0.525850 0.041 Uiso 1 1 calc GR . . . .
 H7B H -0.200879 0.626974 0.486592 0.041 Uiso 1 1 calc GR . . . .
 H7C H -0.069564 0.588568 0.656334 0.041 Uiso 1 1 calc GR . . . .
 C8 C 0.0069(4) 0.6290(3) 0.3452(4) 0.0262(7) Uani 1 1 d . . . . .
 H8 H 0.093731 0.662813 0.316313 0.031 Uiso 1 1 calc R . . . .
 C9 C -0.1397(4) 0.5913(4) 0.2347(4) 0.0335(8) Uani 1 1 d . . . . .
 H9A H -0.230689 0.556694 0.257623 0.040 Uiso 1 1 calc R . . . .
 H9B H -0.154420 0.598602 0.132061 0.040 Uiso 1 1 calc R . . . .
 C10 C 0.4815(4) 0.3833(3) 0.5150(3) 0.0185(6) Uani 1 1 d . . . . .
 H10A H 0.594351 0.336460 0.542257 0.022 Uiso 1 1 calc R . . . .
 H10B H 0.405729 0.311285 0.533171 0.022 Uiso 1 1 calc R . . . .
 C11 C 0.4070(4) 0.4254(3) 0.3503(3) 0.0201(6) Uani 1 1 d . . . . .
 C12 C 0.1910(4) 0.3750(4) 0.1084(4) 0.0330(8) Uani 1 1 d . . . . .
 H12A H 0.093730 0.309020 0.057985 0.050 Uiso 1 1 calc GR . . . .
 H12B H 0.274636 0.361208 0.064829 0.050 Uiso 1 1 calc GR . . . .
 H12C H 0.151004 0.477065 0.093499 0.050 Uiso 1 1 calc GR . . . .
 C13 C 0.2909(4) 0.6564(4) 0.8493(4) 0.0294(8) Uani 1 1 d . . . . .
 H13A H 0.364592 0.721102 0.821594 0.044 Uiso 1 1 calc GR . . . .
 H13B H 0.343840 0.638355 0.958980 0.044 Uiso 1 1 calc GR . . . .
 H13C H 0.179301 0.703149 0.821584 0.044 Uiso 1 1 calc GR . . . .
 C14 C 0.7319(4) 0.3914(3) 0.8401(3) 0.0251(7) Uani 1 1 d . . . . .
 H14A H 0.702344 0.292448 0.797413 0.038 Uiso 1 1 calc GR . . . .
 H14B H 0.781002 0.385870 0.951131 0.038 Uiso 1 1 calc GR . . . .
 H14C H 0.815557 0.434960 0.807424 0.038 Uiso 1 1 calc GR . . . .

loop_
  _atom_site_aniso_label
  _atom_site_aniso_U_11
  _atom_site_aniso_U_22
  _atom_site_aniso_U_33
  _atom_site_aniso_U_23
  _atom_site_aniso_U_13
  _atom_site_aniso_U_12
 O1 0.0172(10) 0.0165(10) 0.0235(10) 0.0035(9) 0.0111(8) 0.0006(8)
 O2 0.0300(12) 0.0325(13) 0.0244(12) 0.0037(10) 0.0126(10) -0.0054(10)
 O3 0.0210(11) 0.0272(12) 0.0186(11) -0.0002(9) 0.0045(8) -0.0019(9)
 C1 0.0193(14) 0.0148(14) 0.0225(15) -0.0007(12) 0.0120(12) -0.0019(12)
 C2 0.0240(15) 0.0206(15) 0.0220(15) 0.0005(13) 0.0129(13) -0.0015(13)
 C3 0.0237(16) 0.0237(16) 0.0196(15) 0.0009(13) 0.0104(13) -0.0012(13)
 C4 0.0215(16) 0.0203(17) 0.0176(16) -0.0015(12) 0.0077(13) -0.0025(12)
 C5 0.0141(13) 0.0171(14) 0.0225(15) 0.0010(12) 0.0090(12) 0.0013(12)
 C6 0.0225(15) 0.0163(14) 0.0287(17) 0.0001(13) 0.0151(14) 0.0008(12)
 C7 0.0245(16) 0.0235(17) 0.0392(19) 0.0027(14) 0.0186(14) 0.0048(13)
 C8 0.0251(15) 0.0242(17) 0.0315(18) 0.0047(14) 0.0138(14) 0.0040(13)
 C9 0.0302(18) 0.035(2) 0.0315(18) 0.0019(16) 0.0090(15) 0.0052(16)
 C10 0.0198(14) 0.0161(15) 0.0203(15) 0.0014(12) 0.0089(12) 0.0021(11)
 C11 0.0197(15) 0.0198(15) 0.0237(16) -0.0020(13) 0.0117(13) 0.0018(12)
 C12 0.0280(17) 0.041(2) 0.0213(17) 0.0033(15) 0.0018(14) 0.0016(15)
 C13 0.0351(18) 0.0282(18) 0.0278(18) -0.0051(14) 0.0160(15) 0.0027(14)
 C14 0.0214(16) 0.0304(18) 0.0222(16) 0.0067(13) 0.0078(13) 0.0010(13)

_geom_special_details
;
 All esds (except the esd in the dihedral angle between two l.s. planes)
 are estimated using the full covariance matrix.  The cell esds are taken
 into account individually in the estimation of esds in distances, angles
 and torsion angles; correlations between esds in cell parameters are only
 used when they are defined by crystal symmetry.  An approximate (isotropic)
 treatment of cell esds is used for estimating esds involving l.s. planes.
;
loop_
  _geom_bond_atom_site_label_1
  _geom_bond_atom_site_label_2
  _geom_bond_distance
  _geom_bond_site_symmetry_2
  _geom_bond_publ_flag
 O1 C1 1.440(3) . ?
 O1 C5 1.444(3) . ?
 O2 C11 1.204(4) . ?
 O3 C11 1.348(4) . ?
 O3 C12 1.443(4) . ?
 C1 H1 1.0000 . ?
 C1 C2 1.525(4) . ?
 C1 C6 1.536(4) . ?
 C2 H2 1.0000 . ?
 C2 C3 1.534(4) . ?
 C2 C13 1.535(5) . ?
 C3 H3A 0.9900 . ?
 C3 H3B 0.9900 . ?
 C3 C4 1.533(4) . ?
 C4 H4 1.0000 . ?
 C4 C5 1.528(4) . ?
 C4 C14 1.528(4) . ?
 C5 H5 1.0000 . ?
 C5 C10 1.522(4) . ?
 C6 H6 1.0000 . ?
 C6 C7 1.525(4) . ?
 C6 C8 1.505(4) . ?
 C7 H7A 0.9800 . ?
 C7 H7B 0.9800 . ?
 C7 H7C 0.9800 . ?
 C8 H8 0.9500 . ?
 C8 C9 1.317(5) . ?
 C9 H9A 0.9500 . ?
 C9 H9B 0.9500 . ?
 C10 H10A 0.9900 . ?
 C10 H10B 0.9900 . ?
 C10 C11 1.501(4) . ?
 C12 H12A 0.9800 . ?
 C12 H12B 0.9800 . ?
 C12 H12C 0.9800 . ?
 C13 H13A 0.9800 . ?
 C13 H13B 0.9800 . ?
 C13 H13C 0.9800 . ?
 C14 H14A 0.9800 . ?
 C14 H14B 0.9800 . ?
 C14 H14C 0.9800 . ?

loop_
  _geom_angle_atom_site_label_1
  _geom_angle_atom_site_label_2
  _geom_angle_atom_site_label_3
  _geom_angle
  _geom_angle_site_symmetry_1
  _geom_angle_site_symmetry_3
  _geom_angle_publ_flag
 C1 O1 C5 114.5(2) . . ?
 C11 O3 C12 115.0(2) . . ?
 O1 C1 H1 108.3 . . ?
 O1 C1 C2 110.3(2) . . ?
 O1 C1 C6 105.6(2) . . ?
 C2 C1 H1 108.3 . . ?
 C2 C1 C6 115.8(2) . . ?
 C6 C1 H1 108.3 . . ?
 C1 C2 H2 108.1 . . ?
 C1 C2 C3 108.0(2) . . ?
 C1 C2 C13 112.8(3) . . ?
 C3 C2 H2 108.1 . . ?
 C3 C2 C13 111.6(3) . . ?
 C13 C2 H2 108.1 . . ?
 C2 C3 H3A 109.2 . . ?
 C2 C3 H3B 109.2 . . ?
 H3A C3 H3B 107.9 . . ?
 C4 C3 C2 112.2(2) . . ?
 C4 C3 H3A 109.2 . . ?
 C4 C3 H3B 109.2 . . ?
 C3 C4 H4 107.3 . . ?
 C5 C4 C3 110.8(2) . . ?
 C5 C4 H4 107.3 . . ?
 C5 C4 C14 112.3(2) . . ?
 C14 C4 C3 111.5(2) . . ?
 C14 C4 H4 107.3 . . ?
 O1 C5 C4 110.6(2) . . ?
 O1 C5 H5 106.6 . . ?
 O1 C5 C10 111.0(2) . . ?
 C4 C5 H5 106.6 . . ?
 C10 C5 C4 114.9(2) . . ?
 C10 C5 H5 106.6 . . ?
 C1 C6 H6 107.3 . . ?
 C7 C6 C1 111.6(2) . . ?
 C7 C6 H6 107.3 . . ?
 C8 C6 C1 109.9(2) . . ?
 C8 C6 H6 107.3 . . ?
 C8 C6 C7 113.1(2) . . ?
 C6 C7 H7A 109.5 . . ?
 C6 C7 H7B 109.5 . . ?
 C6 C7 H7C 109.5 . . ?
 H7A C7 H7B 109.5 . . ?
 H7A C7 H7C 109.5 . . ?
 H7B C7 H7C 109.5 . . ?
 C6 C8 H8 116.7 . . ?
 C9 C8 C6 126.6(3) . . ?
 C9 C8 H8 116.7 . . ?
 C8 C9 H9A 120.0 . . ?
 C8 C9 H9B 120.0 . . ?
 H9A C9 H9B 120.0 . . ?
 C5 C10 H10A 109.5 . . ?
 C5 C10 H10B 109.5 . . ?
 H10A C10 H10B 108.1 . . ?
 C11 C10 C5 110.5(2) . . ?
 C11 C10 H10A 109.5 . . ?
 C11 C10 H10B 109.5 . . ?
 O2 C11 O3 123.0(3) . . ?
 O2 C11 C10 125.6(3) . . ?
 O3 C11 C10 111.4(2) . . ?
 O3 C12 H12A 109.5 . . ?
 O3 C12 H12B 109.5 . . ?
 O3 C12 H12C 109.5 . . ?
 H12A C12 H12B 109.5 . . ?
 H12A C12 H12C 109.5 . . ?
 H12B C12 H12C 109.5 . . ?
 C2 C13 H13A 109.5 . . ?
 C2 C13 H13B 109.5 . . ?
 C2 C13 H13C 109.5 . . ?
 H13A C13 H13B 109.5 . . ?
 H13A C13 H13C 109.5 . . ?
 H13B C13 H13C 109.5 . . ?
 C4 C14 H14A 109.5 . . ?
 C4 C14 H14B 109.5 . . ?
 C4 C14 H14C 109.5 . . ?
 H14A C14 H14B 109.5 . . ?
 H14A C14 H14C 109.5 . . ?
 H14B C14 H14C 109.5 . . ?

loop_
  _refln_index_h
  _refln_index_k
  _refln_index_l
  _refln_F_squared_meas
  _refln_F_squared_sigma
 1 0 0 245.91 6.82
 1 0 0 255.64 6.56
 1 0 0 238.98 7.12
 -1 0 0 245.03 7.13
 -1 0 0 244.46 6.83
 -1 0 0 256.27 6.56
 -1 0 0 247.05 6.52
 2 0 0 -0.11 0.46
 2 0 0 0.41 0.33
 -2 0 0 0.34 0.41
 -2 0 0 0.01 0.14
 -2 0 0 0.79 0.39
 -2 0 0 -0.18 0.15
 2 0 0 0.14 0.17
 -3 0 0 34.75 1.31
 -3 0 0 36.13 2.41
 -3 0 0 37.21 1.95
 3 0 0 36.34 1.39
 -3 0 0 35.67 1.42
 3 0 0 35.16 1.9
 4 0 0 83.49 3.52
 -4 0 0 79.83 4.27
 -4 0 0 80.11 2.76
 -4 0 0 77.42 2.56
 -4 0 0 76.32 3.46
 5 0 0 5.6 1.08
 -5 0 0 5.78 1.09
 -5 0 0 6.91 0.82
 -5 0 0 6.46 0.55
 -5 0 0 7.07 1.68
 -6 0 0 4.71 0.77
 -6 0 0 3.42 1.43
 6 0 0 4.81 1.12
 -6 0 0 5.55 1.18
 -6 0 0 4.84 0.57
 -7 0 0 7.18 1.48
 7 0 0 4.53 1.21
 -7 0 0 6.45 0.64
 -7 0 0 6.01 0.92
 -7 0 0 8.96 2.19
 -8 0 0 0.81 0.78
 -8 0 0 -0.25 0.31
 8 0 0 0.3 0.28
 -8 0 0 0.24 0.16
 -8 0 0 -0.17 0.75
 -9 0 0 1.18 0.67
 -9 0 0 1.52 0.92
 -9 0 0 0.21 1.08
 0 -1 0 -1.54 0.11
 0 -1 0 -1.38 0.1
 0 -1 0 -1.45 0.12
 0 -1 0 -1.43 0.1
 0 -1 0 -1.62 0.15
 0 1 0 -1.3 0.11
 0 1 0 -1.44 0.12
 0 1 0 -1.46 0.17
 0 1 0 -1.21 0.12
 0 1 0 -1.3 0.1
 -1 -1 0 290.68 8.23
 1 -1 0 296.29 7.84
 -1 -1 0 290.4 8.09
 1 -1 0 293.76 8.25
 -1 -1 0 293.23 8.02
 -1 1 0 306.92 8.42
 -1 1 0 296.04 7.99
 1 1 0 304.86 8.27
 1 1 0 307.88 8.44
 -1 1 0 295.64 7.94
 -1 1 0 298.29 8.05
 1 1 0 292.54 8.21
 -2 -1 0 184.08 5.85
 -2 -1 0 182.2 5.36
 2 -1 0 179.8 6.11
 2 -1 0 188.58 5.41
 -2 -1 0 189.31 5.43
 2 1 0 184.56 5.49
 2 1 0 187.7 5.98
 -2 1 0 191.73 5.57
 -2 1 0 187.13 6.23
 2 1 0 192.38 5.49
 -2 1 0 195.51 5.13
 -3 -1 0 9.56 0.72
 -3 -1 0 12.28 1.38
 3 -1 0 9.77 0.86
 3 -1 0 11.83 1.58
 -3 -1 0 11.94 1.69
 -3 -1 0 10.98 0.8
 3 1 0 11.25 0.75
 3 1 0 10.86 0.78
 -3 1 0 11.5 0.55
 3 1 0 11.37 1.28
 -3 1 0 10.62 1.51
 -3 1 0 11.23 0.95
 -4 -1 0 75.82 2.81
 4 -1 0 76.74 4.09
 4 -1 0 70.62 3.09
 -4 -1 0 76.95 4.23
 -4 -1 0 69.09 2.63
 -4 -1 0 80.76 3.6
 -4 1 0 76.78 2.33
 4 1 0 75.95 3.53
 -4 1 0 73.14 3.2
 4 1 0 72.67 2.69
 -4 1 0 68.62 3.9
 -4 1 0 76.18 2.63
 4 1 0 75.95 2.67
 -5 -1 0 32.12 1.7
 5 -1 0 29.89 1.22
 -5 -1 0 29.7 3.32
 5 -1 0 30.72 2.75
 -5 -1 0 31.48 1.52
 5 -1 0 30.41 2
 -5 -1 0 29.35 2.22
 5 1 0 33.35 1.6
 5 1 0 31.53 1.55
 5 1 0 29.81 2.24
 -5 1 0 34.13 2.85
 -5 1 0 33.7 2.16
 -5 1 0 31.64 1.55
 -5 1 0 32.01 1.23
 6 -1 0 8.85 1.35
 -6 -1 0 5.65 1.74
 -6 -1 0 7.36 0.85
 -6 -1 0 9.9 1.18
 -6 -1 0 9.6 1.61
 6 -1 0 7.39 0.57
 -6 1 0 9.69 2.07
 6 1 0 9.14 0.83
 -6 1 0 8.32 0.54
 -6 1 0 5.9 1.19
 6 1 0 12.62 1.83
 -6 1 0 10.76 1.08
 6 1 0 8.59 0.93
 -7 -1 0 22.31 1.6
 -7 -1 0 19.22 2.46
 7 -1 0 18.62 2.16
 -7 -1 0 15.65 2.88
 -7 -1 0 21.06 1.25
 7 -1 0 22.79 1.1
 7 1 0 22.75 2.6
 -7 1 0 18.47 2.97
 -7 1 0 23.33 2.52
 -7 1 0 22.94 1.49
 7 1 0 20.78 1.31
 -8 -1 0 1.28 0.87
 8 -1 0 -0.02 0.54
 -8 -1 0 0.73 0.32
 -8 -1 0 0.19 1.07
 -8 -1 0 2.07 0.67
 -8 1 0 1.09 0.53
 -8 1 0 1.36 1.17
 -8 1 0 0.74 0.73
 -9 -1 0 0.29 0.98
 -9 -1 0 1.84 1.08
 -9 -1 0 0.55 0.59
 -9 1 0 1.21 0.72
 -9 1 0 0.99 1.38
 -9 1 0 1.62 0.75
 0 -2 0 913.96 24.08
 0 -2 0 898.59 23.99
 0 -2 0 866.4 23.7
 0 -2 0 940.67 24.95
 0 2 0 934.9 25.06
 0 2 0 920.34 25.01
 0 2 0 948.75 25.37
 0 2 0 1000 25.49
 0 2 0 911.08 24.92
 1 -2 0 476.55 12.71
 -1 -2 0 455.19 13.05
 1 -2 0 463.65 12.66
 -1 -2 0 469.15 12.91
 1 -2 0 471.98 12.78
 -1 -2 0 458.31 12.83
 1 2 0 481.08 13.34
 -1 2 0 498.12 13.25
 -1 2 0 483.56 13.14
 -1 2 0 496.3 13.19
 1 2 0 490.35 13.44
 1 2 0 475.75 13.51
 -1 2 0 463.04 13.65
 1 2 0 488.56 13.45
 2 -2 0 96.2 3.03
 -2 -2 0 91.86 3.58
 -2 -2 0 92.99 3.42
 -2 -2 0 92.37 3.27
 2 -2 0 94.26 3.66
 -2 2 0 99.49 3.08
 -2 2 0 100.78 3.21
 2 2 0 102.99 3.57
 2 2 0 95.2 3.45
 2 2 0 100.84 3.81
 -2 2 0 103.86 3.8
 -2 2 0 98.31 3.02
 3 -2 0 203.93 5.94
 3 -2 0 205.1 5.75
 -3 -2 0 194.51 6.79
 -3 -2 0 202.06 6.18
 -3 -2 0 200.4 6.34
 3 -2 0 192.52 7.06
 -3 2 0 226.39 7.65
 -3 2 0 222.38 6.34
 3 2 0 221.86 6.79
 -3 2 0 219.41 6.6
 3 2 0 221.32 6.76
 -3 2 0 223.2 6.14
 3 2 0 220.31 7.43
 4 -2 0 40.45 2.87
 -4 -2 0 47.09 2.09
 -4 -2 0 42.98 2.15
 4 -2 0 41.28 2.02
 -4 -2 0 45.48 2.67
 4 2 0 43.62 2.1
 -4 2 0 47.42 2.27
 4 2 0 44.77 2.7
 4 2 0 48.7 2.12
 -4 2 0 43.83 1.7
 -4 2 0 46.65 2.98
 -4 2 0 44.77 1.57
 -5 -2 0 6.41 1.27
 -5 -2 0 5.21 0.8
 5 -2 0 6.78 1.02
 5 -2 0 3.78 1.25
 -5 -2 0 4.83 1.48
 -5 -2 0 4.32 0.85
 5 2 0 6.1 1.24
 5 2 0 5.67 0.81
 -5 2 0 4.63 0.53
 -5 2 0 4.8 0.41
 5 2 0 4.55 0.77
 -5 2 0 6.35 1.07
 -5 2 0 4.26 1.26
 6 -2 0 27.97 3.37
 -6 -2 0 25.52 1.59
 -6 -2 0 27.22 1.83
 6 -2 0 28.32 1.27
 6 -2 0 28.66 1.97
 -6 -2 0 28.82 2.44
 -6 -2 0 24.14 3.37
 6 2 0 29.84 1.66
 -6 2 0 35.36 3.12
 6 2 0 28.84 2.46
 -6 2 0 28.68 2.1
 -6 2 0 29.04 1.12
 6 2 0 28.53 1.74
 -6 2 0 28.12 1.14
 -6 2 0 29.15 1.61
 -7 -2 0 7.09 1.18
 7 -2 0 7.49 1.28
 7 -2 0 5.86 1.88
 -7 -2 0 4.86 1.74
 -7 -2 0 8.1 1.01
 7 -2 0 6.35 0.67
 -7 -2 0 6.57 1.51
 -7 2 0 7.17 1.44
 -7 2 0 4 1.45
 7 2 0 5.51 0.86
 -7 2 0 8.5 1.05
 7 2 0 4.05 0.78
 -8 -2 0 -0.19 0.86
 8 -2 0 0.11 0.48
 -8 -2 0 0.66 0.51
 -8 -2 0 0.76 0.77
 8 2 0 -0.08 0.32
 -8 2 0 0.22 0.35
 -8 2 0 0.07 0.55
 -8 2 0 0.19 0.83
 -9 -2 0 8.76 2.58
 -9 -2 0 4.71 1.5
 -9 -2 0 8.32 1.4
 -9 2 0 9.65 2.39
 -9 2 0 7.29 1.52
 0 -3 0 0.06 0.28
 0 -3 0 -0.06 0.33
 0 -3 0 0.23 0.3
 0 -3 0 -0.19 0.39
 0 -3 0 0.22 0.24
 0 3 0 -0.21 0.25
 0 3 0 -0.14 0.29
 0 3 0 -0.25 0.27
 0 3 0 -0.08 0.38
 0 3 0 -0.28 0.19
 1 -3 0 39.66 1.82
 1 -3 0 38.59 1.22
 -1 -3 0 37.95 1.9
 -1 -3 0 43.36 2.27
 1 -3 0 36.16 1.75
 -1 -3 0 36.19 1.83
 1 -3 0 37.4 1.86
 -1 3 0 37.56 1.83
 1 3 0 37.89 1.97
 -1 3 0 39.47 1.33
 1 3 0 38.71 2.18
 -1 3 0 40.2 1.9
 -1 3 0 39 2.26
 1 3 0 40.55 1.96
 -1 3 0 43.57 1.89
 1 3 0 40.7 2.07
 2 -3 0 31.23 1.64
 2 -3 0 37.13 2
 -2 -3 0 34.05 2.03
 2 -3 0 36.75 1.68
 -2 -3 0 33.47 1.97
 -2 -3 0 34.17 1.84
 -2 3 0 39.78 2.02
 2 3 0 35.75 2.04
 -2 3 0 36.06 1.76
 2 3 0 36.12 2.06
 -2 3 0 39.98 1.73
 -2 3 0 37.34 1.22
 2 3 0 38.01 2.14
 2 3 0 35.2 1.95
 -3 -3 0 65.22 2.79
 -3 -3 0 58.41 2.88
 3 -3 0 62.77 2.44
 3 -3 0 61.56 3.21
 -3 -3 0 59.95 3.07
 -3 3 0 67.46 2.38
 3 3 0 66.08 3.3
 -3 3 0 64.26 2.54
 -3 3 0 68.41 3.25
 3 3 0 66.91 2.94
 3 3 0 65.07 2.94
 -3 3 0 67.91 2.35
 -4 -3 0 79.22 3.9
 -4 -3 0 79.15 3.51
 4 -3 0 79.9 4.19
 4 -3 0 79.73 2.89
 -4 -3 0 77.91 3.29
 -4 3 0 88.47 2.82
 4 3 0 79.13 3.47
 4 3 0 88.89 3.56
 -4 3 0 84.06 3.04
 -4 3 0 86.94 3.23
 -4 3 0 89.4 4.28
 4 3 0 88.42 4.28
 5 -3 0 0.64 0.31
 -5 -3 0 0.13 0.35
 -5 -3 0 0.19 0.48
 -5 -3 0 0.16 0.33
 5 -3 0 0.19 0.61
 5 3 0 0.34 0.35
 -5 3 0 0.56 0.64
 -5 3 0 -0.03 0.29
 5 3 0 -0.49 0.33
 -5 3 0 0.1 0.17
 5 3 0 -0.26 0.31
 -5 3 0 0.37 0.27
 -6 -3 0 5.57 1.78
 -6 -3 0 10.5 1.89
 -6 -3 0 7.75 1.3
 6 -3 0 9.6 1.98
 -6 -3 0 7.66 1.1
 -6 3 0 7.38 0.63
 6 3 0 8.89 1.71
 6 3 0 6.1 0.96
 -6 3 0 7.8 1.75
 -6 3 0 6.87 1.15
 -6 3 0 6.48 0.52
 6 3 0 7.42 1.13
 -7 -3 0 5.22 0.93
 7 -3 0 4.49 0.65
 -7 -3 0 2.65 1.1
 -7 -3 0 4.6 1.08
 -7 -3 0 5.98 1.84
 -7 3 0 3.95 1.02
 -7 3 0 4.63 0.33
 -7 3 0 4.74 0.82
 7 3 0 3.82 0.86
 -7 3 0 4.57 0.36
 -7 3 0 2.79 1.25
 7 3 0 4.97 0.91
 -8 -3 0 2.17 1.28
 -8 -3 0 4.01 1.07
 -8 -3 0 1.7 0.96
 -8 3 0 1.19 1.04
 8 3 0 1.21 0.56
 -8 3 0 3 0.74
 -8 3 0 4.28 1.13
 -9 -3 0 3.74 1.35
 -9 -3 0 3.04 1.11
 -9 3 0 2.78 1.11
 -9 3 0 2.84 1.49
 0 -4 0 224.76 7.45
 0 -4 0 234.93 7.18
 0 -4 0 230.38 6.83
 0 -4 0 220.29 8.01
 0 -4 0 238.35 7.41
 0 4 0 248.99 7.83
 0 4 0 245.79 7.76
 0 4 0 249.3 7.23
 0 4 0 226.06 7.52
 0 4 0 237.46 8.22
 -1 -4 0 58.96 2.62
 -1 -4 0 55.77 2.69
 1 -4 0 63.15 2.69
 -1 -4 0 55.7 2.69
 1 -4 0 61.69 1.96
 1 -4 0 61.44 2.59
 1 -4 0 56.88 2.7
 1 4 0 62.7 3.02
 -1 4 0 61.47 3.29
 -1 4 0 63.92 2.75
 1 4 0 62.38 2.81
 -1 4 0 64.88 2.84
 1 4 0 70.04 3.07
 -1 4 0 61.91 2.15
 -1 4 0 64.86 2.9
 1 4 0 67.28 3.3
 2 -4 0 22.27 1.55
 -2 -4 0 27.93 1.77
 -2 -4 0 26.26 1.8
 2 -4 0 25.47 1.71
 2 -4 0 25.35 1.54
 -2 -4 0 23.92 1.9
 -2 4 0 27.96 1.73
 2 4 0 25.91 1.92
 -2 4 0 22.69 1.98
 -2 4 0 26.45 1.64
 2 4 0 24.73 1.77
 -2 4 0 27.91 1.61
 2 4 0 25.73 1.83
 2 4 0 24.36 1.81
 3 -4 0 64.5 2.75
 -3 -4 0 58.09 3.17
 -3 -4 0 61.38 3.22
 3 -4 0 61.04 3.2
 -3 -4 0 65.22 3
 3 4 0 70.14 3.37
 -3 4 0 68.72 2.93
 -3 4 0 68.18 3.3
 3 4 0 71.17 3.43
 -3 4 0 72.56 3.75
 -3 4 0 68.61 2.19
 3 4 0 73.3 3.62
 -3 4 0 68.73 2.74
 3 4 0 72.33 3.32
 -4 -4 0 3.43 0.77
 -4 -4 0 5.42 1.16
 4 4 0 4.1 0.99
 4 4 0 3.97 0.87
 -4 4 0 4.51 1.04
 5 -4 0 12.85 1.06
 -5 -4 0 17.15 2
 -5 -4 0 10.09 1.74
 -5 -4 0 10.28 1.36
 5 -4 0 12.21 2.04
 -5 4 0 14.13 0.88
 -5 4 0 13.97 1.09
 5 4 0 12.85 1.57
 5 4 0 12.14 1.92
 -5 4 0 13.14 1.98
 -5 4 0 13.43 1.13
 5 4 0 14.11 1.64
 -6 -4 0 3.47 1.12
 -6 -4 0 5.39 1.07
 6 -4 0 4.9 1.6
 -6 -4 0 4.3 1.1
 6 -4 0 3.96 0.72
 -6 4 0 3.94 0.84
 6 4 0 5.92 1.12
 -6 4 0 6.47 0.83
 6 4 0 5.11 1
 -6 4 0 2.75 1.11
 -6 4 0 3.6 0.51
 -7 -4 0 9.05 1.57
 -7 -4 0 9.06 2.36
 -7 -4 0 7.94 1.25
 -7 -4 0 11.35 2.16
 -7 4 0 5.41 1.54
 -7 4 0 9.18 1.35
 7 4 0 8.07 1.27
 -7 4 0 8.61 0.71
 7 4 0 6.07 1.15
 -7 4 0 7.82 0.59
 -8 -4 0 8.94 2.41
 -8 -4 0 7.26 1.79
 -8 -4 0 5.1 1.23
 -8 4 0 5.39 1.76
 8 4 0 5.08 1
 -8 4 0 5.79 1.04
 -8 4 0 6.83 1.25
 0 -5 0 -0.02 0.4
 0 -5 0 0.38 0.38
 0 -5 0 0.44 0.39
 0 -5 0 0.8 0.6
 0 -5 0 0.52 0.36
 0 5 0 -0.19 0.28
 0 5 0 0.48 0.47
 0 5 0 0.45 0.48
 0 5 0 0.29 0.37
 -1 -5 0 16.13 1.67
 1 -5 0 15.27 1.33
 1 -5 0 15.32 0.86
 -1 -5 0 13.73 1.22
 1 -5 0 14.81 1.23
 1 -5 0 15.83 1.67
 -1 -5 0 15.68 2.01
 -1 -5 0 15.56 1.67
 -1 5 0 18.12 1.52
 -1 5 0 16.37 1.42
 -1 5 0 15.32 1.35
 1 5 0 18.35 1.91
 1 5 0 17.03 1.42
 -1 5 0 12.73 1.91
 1 5 0 13.8 1.85
 -1 5 0 15.89 0.96
 1 5 0 19.12 1.99
 -2 -5 0 45.06 2.97
 2 -5 0 50.85 2.65
 2 -5 0 48.26 2.47
 -2 -5 0 49.11 2.67
 -2 -5 0 47.7 2.62
 2 -5 0 47.23 2.53
 2 5 0 54.69 2.93
 2 5 0 48.3 3
 -2 5 0 54.05 2.69
 -2 5 0 49.38 3.2
 -2 5 0 52.37 1.57
 2 5 0 58.49 3.12
 2 5 0 50.01 2.87
 -2 5 0 48.76 2.56
 -2 5 0 53.69 2.74
 -3 -5 0 70.05 3.37
 -3 -5 0 66.39 3.71
 3 -5 0 68.4 3.51
 3 -5 0 70.32 3.21
 -3 -5 0 71.19 3.61
 -3 5 0 80.04 3.63
 -3 5 0 74.07 4.13
 3 5 0 71.38 3.66
 3 5 0 80.25 3.88
 3 5 0 72.49 3.82
 -3 5 0 75.64 3.37
 -3 5 0 77.32 3.19
 3 5 0 69.76 3.73
 -4 -5 0 15.82 1.78
 -4 -5 0 15.96 2.04
 -4 -5 0 15.17 2.03
 4 -5 0 14.59 1.53
 4 -5 0 13.91 1.96
 -4 5 0 19.06 2.51
 4 5 0 16.66 1.93
 -4 5 0 16.91 1.4
 -4 5 0 16.29 0.79
 4 5 0 15.89 1.93
 4 5 0 11.94 1.78
 -4 5 0 17.43 2.06
 4 5 0 16.46 2.17
 -4 5 0 17.61 1.23
 -5 -5 0 4.89 1.22
 -5 -5 0 4.36 1.18
 5 -5 0 3.92 1.24
 -5 -5 0 4.29 1.03
 5 -5 0 3.64 0.77
 -5 5 0 5.27 1.28
 5 5 0 3.36 0.94
 -5 5 0 2.5 0.52
 5 5 0 5.82 1.23
 -5 5 0 5.29 0.69
 5 5 0 4.18 1.03
 -5 5 0 4.58 0.86
 5 5 0 3.43 1.12
 -6 -5 0 7.89 1.54
 6 -5 0 10.42 1.27
 -6 -5 0 10.93 1.92
 6 -5 0 11.19 2.16
 -6 -5 0 9.51 1.42
 -6 5 0 11.31 1.21
 -6 5 0 13.33 2.15
 6 5 0 13.89 1.87
 -6 5 0 11.83 0.88
 -6 5 0 12.93 1.34
 6 5 0 10.52 1.53
 -7 -5 0 12.02 2.17
 -7 -5 0 12.26 2.01
 -7 5 0 11.39 1
 -7 5 0 11.63 2.13
 7 5 0 15.42 1.87
 7 5 0 12.07 1.71
 -7 5 0 14.51 1.56
 -8 -5 0 3.73 1.34
 -8 -5 0 3.39 1.15
 -8 -5 0 2.36 1.48
 8 5 0 3.05 0.91
 -8 5 0 5.96 1.75
 0 -6 0 6.28 1.46
 0 -6 0 7.77 0.98
 0 -6 0 7.15 1.17
 0 -6 0 7.4 1.18
 0 -6 0 10.12 1.52
 0 6 0 7.3 1.29
 0 6 0 7.91 1.04
 0 6 0 8.22 1.6
 0 6 0 7.69 1.36
 -1 -6 0 24.94 1.87
 -1 -6 0 28.48 1.85
 -1 -6 0 25.8 2.85
 1 -6 0 21.57 1.76
 1 -6 0 27.24 2.08
 -1 -6 0 27.23 1.98
 1 -6 0 26.83 1.82
 1 -6 0 25.32 1.27
 -1 6 0 29.96 2.56
 1 6 0 27.51 2.18
 -1 6 0 27.99 2.05
 -1 6 0 26.82 2.08
 1 6 0 25.24 2.14
 1 6 0 28.39 1.95
 -1 6 0 25.4 1.9
 -1 6 0 26.7 1.43
 1 6 0 30.76 2.52
 -2 -6 0 15.96 1.89
 -2 -6 0 18.56 1.96
 2 -6 0 14.39 1.65
 -2 -6 0 16.65 2.28
 2 -6 0 17.16 1.54
 -2 -6 0 12.75 1.63
 2 -6 0 16.49 1.85
 2 6 0 18.16 2.12
 -2 6 0 16.7 1.53
 -2 6 0 17.63 1.86
 -2 6 0 17.66 1.94
 2 6 0 20.4 2.28
 -2 6 0 18.12 0.8
 2 6 0 22.31 2.26
 2 6 0 20.19 2.4
 -2 6 0 21 2.67
 3 -6 0 57.33 3.25
 3 -6 0 60.38 3.15
 -3 -6 0 60.4 3.38
 -3 -6 0 62.49 3.3
 -3 -6 0 58.07 3.68
 -3 6 0 70.23 3.5
 -3 6 0 71.18 3.25
 3 6 0 71.94 3.98
 3 6 0 69.02 3.81
 3 6 0 67.61 3.8
 -3 6 0 65.97 4.12
 3 6 0 66.46 3.69
 -3 6 0 68.76 3.43
 -4 -6 0 77.79 4.23
 -4 -6 0 81.87 3.97
 -4 -6 0 84.84 4.57
 4 -6 0 83.94 4.38
 4 -6 0 78.73 3.73
 -4 6 0 95.75 4.48
 -4 6 0 96.21 4.13
 4 6 0 97.43 4.72
 -4 6 0 92.73 3.76
 4 6 0 92.82 4.67
 -4 6 0 84.69 4.92
 4 6 0 89.32 4.49
 4 6 0 90.32 4.79
 -5 -6 0 8.81 1.74
 -5 -6 0 9.36 1.78
 5 -6 0 9.56 1.81
 -5 -6 0 8.02 1.38
 5 -6 0 10.32 1.37
 -5 6 0 10.73 1.43
 -5 6 0 13.66 2.02
 -5 6 0 10.97 1.19
 5 6 0 12.47 1.89
 5 6 0 9.5 1.65
 -5 6 0 11.31 2.14
 -6 -6 0 1.06 0.86
 6 -6 0 1.86 1.04
 -6 -6 0 0.91 0.82
 -6 -6 0 1.16 0.62
 6 -6 0 0.64 0.5
 -6 6 0 0.23 0.32
 -6 6 0 0.52 0.3
 -6 6 0 0.07 0.77
 -6 6 0 0.99 0.86
 6 6 0 1.33 0.79
 -6 6 0 0.03 0.41
 6 6 0 0.78 0.64
 -7 -6 0 4.34 1.33
 -7 -6 0 3.63 1.27
 7 6 0 7.61 1.57
 -7 6 0 7.04 1.06
 -7 6 0 3.78 1.38
 7 6 0 5.47 1.43
 -7 6 0 3.59 1.38
 -8 -6 0 1.72 0.98
 -8 6 0 0.88 0.44
 -8 6 0 0.62 0.94
 -1 -7 0 22.56 2.91
 -1 -7 0 23.99 1.98
 1 -7 0 25.95 2.62
 1 -7 0 18.87 1.66
 -1 -7 0 24.97 1.8
 -1 -7 0 18.92 2.08
 1 -7 0 18.73 2.04
 1 -7 0 21.92 1.25
 -1 7 0 24.68 3
 -1 7 0 20.69 1.9
 -1 7 0 24.5 2.11
 1 7 0 21.9 2.76
 -1 7 0 25.57 2.11
 1 7 0 26.37 1.96
 -1 7 0 23.35 1.42
 1 7 0 21.05 2.39
 1 7 0 27.26 2.79
 -2 -7 0 24 2.04
 -2 -7 0 26.88 3.19
 2 -7 0 23.97 1.94
 2 -7 0 24.32 2.08
 -2 -7 0 27.24 2.07
 2 -7 0 25.46 1.96
 -2 -7 0 21.48 2
 2 7 0 27.86 2.88
 2 7 0 28.55 2.27
 -2 7 0 27.11 2.13
 -2 7 0 26.95 2.12
 -2 7 0 30.17 3.35
 2 7 0 29.27 3.14
 -2 7 0 25.87 2.16
 2 7 0 27.57 2.37
 -2 7 0 28.62 1.17
 3 -7 0 15.85 1.98
 -3 -7 0 17.36 2.06
 3 -7 0 21.51 2.25
 -3 -7 0 20.95 2.72
 -3 -7 0 14.84 2
 3 7 0 20.61 2.47
 3 7 0 18.39 2.55
 3 7 0 20.1 2.5
 -3 7 0 17.58 2.64
 3 7 0 20.67 2.46
 -3 7 0 19.87 1.72
 -3 7 0 22.51 1.94
 -3 7 0 19.15 2.15
 -4 -7 0 51.91 3.73
 -4 -7 0 54.17 3.47
 4 -7 0 53.72 3.13
 -4 -7 0 53.66 3.23
 4 -7 0 53.89 3.5
 4 7 0 64.39 4
 4 7 0 60.19 3.76
 4 7 0 64.19 3.93
 -4 7 0 62.64 3.12
 -4 7 0 57.6 3.44
 -4 7 0 66.78 3.48
 -4 7 0 58.28 4.12
 -5 -7 0 6.17 1.49
 5 -7 0 6.18 1.59
 -5 -7 0 6.02 1.32
 5 -7 0 6.68 1.28
 -5 -7 0 5.35 1.5
 5 7 0 7.45 1.64
 -5 7 0 5.55 1.58
 -5 7 0 5.21 1.29
 -5 7 0 6.88 1.25
 -5 7 0 7.09 1.05
 -6 -7 0 5.49 1.25
 -6 -7 0 3.66 1.44
 -6 -7 0 4.25 1.39
 -6 7 0 4.99 1.09
 6 7 0 6.57 1.5
 -6 7 0 2.77 1.09
 -7 -7 0 2.38 1.11
 -7 -7 0 2.59 1.18
 -7 7 0 1.87 0.7
 -7 7 0 1.47 0.91
 7 7 0 1.1 0.84
 0 -8 0 50.85 2.49
 0 -8 0 47.23 3.81
 0 -8 0 47.31 2.87
 0 -8 0 41.89 3.26
 0 8 0 53.64 3.52
 0 8 0 55.5 2.84
 0 8 0 56.76 3.55
 1 -8 0 12.5 1.66
 -1 -8 0 10.53 1.7
 -1 -8 0 7.46 1.88
 -1 -8 0 11.59 1.52
 -1 -8 0 10.68 1.6
 1 -8 0 11.55 0.93
 1 8 0 13.25 2.04
 -1 8 0 10.64 1.74
 -1 8 0 12.09 1.89
 1 8 0 17.78 2.41
 -1 8 0 14.18 1.14
 -1 8 0 9.79 1.67
 1 8 0 14.54 1.8
 2 -8 0 8.53 1.64
 -2 -8 0 5.08 1.25
 -2 -8 0 2.47 1.33
 2 -8 0 4.2 1.02
 -2 -8 0 1.37 0.74
 -2 -8 0 3.97 0.98
 -2 8 0 6.29 1.35
 2 8 0 4.31 1.09
 -2 8 0 5.11 1.32
 -2 8 0 6.44 0.55
 2 8 0 5.18 1.32
 -2 8 0 6.18 1.3
 -3 -8 0 9.63 1.59
 -3 -8 0 9.97 1.71
 3 -8 0 6.67 1.41
 -3 -8 0 6.03 1.33
 -3 -8 0 6.25 1.65
 3 -8 0 8.15 1.54
 -3 8 0 10.08 1.68
 -3 8 0 9.48 1.59
 -3 8 0 10.39 1.72
 3 8 0 8.56 1.66
 3 8 0 6.37 1.5
 -4 -8 0 54.68 3.46
 -4 -8 0 57.46 4.18
 4 -8 0 59.15 3.74
 -4 -8 0 57.53 3.66
 4 -8 0 52.92 3.36
 -4 8 0 66.54 3.73
 -4 8 0 67.3 3.47
 4 8 0 71.97 4.3
 -4 8 0 59.3 3.67
 5 -8 0 0.69 0.65
 -5 -8 0 0.35 0.75
 5 -8 0 0.55 0.76
 -5 -8 0 1.8 1.04
 -5 -8 0 0.29 0.72
 -5 8 0 1.16 0.84
 -5 8 0 0.97 0.73
 5 8 0 0.81 0.81
 -6 -8 0 6.65 1.71
 -6 -8 0 6.61 1.85
 -6 8 0 8.23 1.45
 6 8 0 6.56 1.69
 -6 8 0 5.33 1.39
 0 -9 0 2.65 0.89
 0 9 0 3.75 1.19
 0 9 0 3.13 1.11
 0 9 0 2.9 0.79
 -1 -9 0 8.64 1.36
 1 -9 0 7.06 0.88
 -1 -9 0 9.84 2.22
 1 -9 0 7.22 1.32
 -1 -9 0 8.19 1.5
 -1 9 0 8.5 1.1
 -1 9 0 7.05 1.57
 1 9 0 11.76 2.07
 -1 9 0 7.07 1.55
 1 9 0 11.6 1.7
 -2 -9 0 0.94 0.7
 -2 -9 0 1.71 1.2
 -2 -9 0 0.18 0.63
 2 -9 0 0.71 0.66
 2 9 0 0.88 0.78
 -2 9 0 0.19 0.62
 2 9 0 0.38 0.76
 -2 9 0 1.49 0.85
 -2 9 0 0.91 0.79
 3 -9 0 16.81 2.31
 -3 -9 0 15.77 2.75
 3 -9 0 14.88 2.09
 -3 -9 0 16.16 2.17
 -3 9 0 20.46 2.38
 3 9 0 23.46 2.99
 -3 9 0 19.15 2.45
 -3 9 0 21.1 2.61
 4 -9 0 6.95 1.59
 -4 -9 0 7.18 1.91
 -4 -9 0 4.94 1.27
 4 -9 0 4.4 1.39
 -4 9 0 7.21 1.51
 -4 9 0 6.37 1.49
 4 9 0 7.24 1.79
 -5 -9 0 9.32 1.94
 -5 -9 0 10.63 2.39
 -5 9 0 11.82 1.91
 -5 9 0 10.33 1.86
 5 9 0 13.41 2.32
 0 -10 0 22.2 1.7
 0 10 0 19.8 2.79
 -1 -10 0 7.03 2.1
 1 -10 0 10.34 1.73
 -1 -10 0 7.14 1.29
 -1 10 0 12.34 2.24
 1 10 0 9.26 1.95
 1 10 0 9.32 1.6
 -2 -10 0 4.13 1.09
 2 -10 0 4.83 1.23
 -2 -10 0 5.99 1.93
 -2 10 0 6.41 1.68
 -2 10 0 6.04 1.5
 2 10 0 5.05 1.37
 2 10 0 7.67 1.81
 -2 10 0 3.17 1.19
 -3 -10 0 1.57 1.13
 -3 -10 0 1.68 0.83
 3 10 0 1.67 1.04
 -3 10 0 1.52 0.97
 -3 10 0 1.38 1.04
 -4 -10 0 5.99 1.55
 -4 -10 0 6.51 2
 -4 10 0 5.55 1.55
 -4 10 0 7.51 1.71
 4 10 0 7.61 1.93
 1 11 0 15.42 3.04
 -9 0 1 1.04 1.17
 -9 0 1 0.29 0.78
 8 0 -1 0.26 0.67
 8 0 -1 -0.13 0.25
 -8 0 1 0.66 0.36
 -8 0 1 1.47 0.52
 -8 0 1 0.71 0.8
 -8 0 1 0.16 0.87
 -7 0 1 26.86 1.51
 7 0 -1 28.15 2.33
 -7 0 1 27.7 3.67
 -7 0 1 28.64 2.35
 7 0 -1 27.52 1.46
 -7 0 1 24.63 1.45
 -6 0 1 18.4 1.18
 -6 0 1 21.15 2.93
 6 0 -1 17.65 1.11
 -6 0 1 20.16 1.16
 6 0 -1 24.3 1.97
 -6 0 1 19.75 2.16
 5 0 -1 102.65 4.32
 5 0 -1 97.45 5.19
 -5 0 1 102.02 5.25
 5 0 -1 97.4 3.33
 -5 0 1 97.52 4.23
 -5 0 1 101.03 3.24
 -5 0 1 99.35 3.41
 4 0 -1 15.35 2.09
 4 0 -1 15.9 1.34
 4 0 -1 14.12 0.88
 -4 0 1 14.86 0.77
 -4 0 1 14.89 0.93
 -4 0 1 15.41 1.32
 -4 0 1 18.14 2.2
 -3 0 1 13.22 1.11
 -3 0 1 13.52 1.71
 -3 0 1 13.81 0.61
 -3 0 1 13.26 0.81
 3 0 -1 14.58 0.81
 3 0 -1 13.96 1.74
 3 0 -1 13.93 1.12
 -2 0 1 521.05 15.02
 2 0 -1 526.55 15.06
 2 0 -1 526.82 14.12
 -2 0 1 538.24 14.16
 -2 0 1 537.72 14.49
 2 0 -1 540.82 14.51
 -1 0 1 3.18 0.39
 -1 0 1 3.27 0.48
 1 0 -1 3.08 0.18
 1 0 -1 3.58 0.5
 1 0 -1 2.82 0.36
 1 0 -1 2.87 0.32
 -1 0 1 3.07 0.34
 0 0 1 487.53 12.7
 0 0 -1 454.64 12.51
 0 0 -1 442.69 12.6
 0 0 1 474.79 12.31
 0 0 -1 458.58 12.22
 1 0 1 -0.08 0.08
 1 0 1 0.08 0.16
 -1 0 -1 0.15 0.17
 -1 0 -1 0.06 0.09
 2 0 1 106.64 3.07
 2 0 1 111.66 3.47
 -2 0 -1 113.78 3.51
 -2 0 -1 109.24 3.88
 2 0 1 114.04 3.85
 3 0 1 18.44 1.05
 -3 0 -1 16.73 1.03
 3 0 1 15.81 0.71
 3 0 1 18.29 1.36
 -3 0 -1 19.99 2.22
 -3 0 -1 17.46 1.37
 -4 0 -1 6.56 1.15
 4 0 1 6.2 1.06
 4 0 1 6.03 0.78
 -4 0 -1 5.99 1.48
 4 0 1 6.4 0.46
 -4 0 -1 7.76 0.88
 5 0 1 21.06 1.78
 -5 0 -1 26.75 3.15
 -5 0 -1 22.08 1.91
 -5 0 -1 22.87 1.45
 5 0 1 21.93 0.99
 6 0 1 0.45 0.53
 6 0 1 0.42 0.22
 -6 0 -1 0.69 0.57
 -6 0 -1 1.69 0.57
 -6 0 -1 1.55 1.17
 7 0 1 31.93 2.56
 7 0 1 34.42 1.4
 -7 0 -1 30.31 2
 -7 0 -1 33.08 4.13
 -7 0 -1 33.68 2.76
 -8 0 -1 7.33 1.2
 -8 0 -1 7.85 1.68
 -8 0 -1 6.25 2.04
 -9 0 -1 0.99 1.39
 -9 0 -1 0.01 0.69
 -9 0 -1 0.25 0.53
 -9 -1 1 3.06 1.56
 -9 -1 1 9.05 1.89
 -9 -1 1 7.31 1.61
 -9 1 1 7.28 1.57
 -9 1 1 4.93 1.92
 8 -1 -1 -0.14 0.47
 8 -1 -1 0.48 0.3
 -8 -1 1 0.57 0.98
 -8 -1 1 0.06 0.53
 -8 -1 1 -0.41 0.29
 -8 -1 1 0.2 0.4
 -8 1 1 0.03 0.57
 -8 1 1 0.36 0.3
 8 1 -1 0.12 0.29
 -8 1 1 -0.18 0.27
 -8 1 1 -0.59 0.62
 7 -1 -1 24.03 3.34
 -7 -1 1 25.03 2.69
 -7 -1 1 23.55 3.44
 7 -1 -1 25.11 2.13
 -7 -1 1 25.76 1.56
 7 -1 -1 23.28 1.27
 -7 -1 1 22.64 1.5
 7 1 -1 26.96 2.39
 -7 1 1 24.62 2.1
 -7 1 1 25.09 1.39
 -7 1 1 22.3 3.19
 -7 1 1 23.99 1.32
 7 1 -1 25.3 1.52
 -6 -1 1 55.6 3.24
 6 -1 -1 56.91 3.02
 -6 -1 1 49.6 3.89
 6 -1 -1 52.75 2.05
 -6 -1 1 49.58 2.26
 6 -1 -1 47.18 3.74
 -6 -1 1 52.67 2.36
 6 1 -1 51.52 3.22
 -6 1 1 51.86 2.13
 -6 1 1 51.86 3.84
 6 1 -1 56.87 2.13
 -6 1 1 55.22 2.12
 6 1 -1 53.9 2.36
 -6 1 1 53.29 2.96
 -5 -1 1 10.66 0.86
 -5 -1 1 10.28 1.51
 5 -1 -1 10.33 0.73
 -5 -1 1 7.78 1.71
 5 -1 -1 11.85 1.44
 5 -1 -1 9.22 1.78
 -5 -1 1 10.47 0.91
 -5 1 1 10.73 0.72
 5 1 -1 11.34 1.61
 -5 1 1 10.17 0.77
 5 1 -1 11.09 0.91
 -5 1 1 12.18 2.02
 -5 1 1 10.35 1.35
 5 1 -1 12 0.76
 -4 -1 1 5.11 0.71
 -4 -1 1 4.38 0.91
 4 -1 -1 4.51 0.82
 -4 -1 1 8 1.53
 4 -1 -1 5.59 0.58
 -4 -1 1 5.84 0.68
 4 -1 -1 3.22 1.03
 4 1 -1 4.82 0.53
 -4 1 1 5.68 0.61
 -4 1 1 5.71 0.91
 4 1 -1 5.11 0.7
 4 1 -1 5.86 1.06
 -4 1 1 4.24 1.08
 -4 1 1 4.93 0.44
 -3 -1 1 7.13 0.6
 -3 -1 1 7.39 0.79
 3 -1 -1 6.39 0.51
 3 -1 -1 5.86 1.14
 3 -1 -1 8.67 0.91
 -3 -1 1 7.12 1.27
 -3 -1 1 6.19 0.96
 3 1 -1 7.04 1.05
 3 1 -1 7.21 0.77
 -3 1 1 7.39 0.54
 -3 1 1 7.8 1.26
 -3 1 1 6.77 0.8
 3 1 -1 7.31 0.55
 -2 -1 1 157.65 4.63
 2 -1 -1 158.79 5.36
 2 -1 -1 158.28 4.49
 -2 -1 1 159.45 5.43
 2 -1 -1 162.81 4.62
 -2 -1 1 148.4 4.69
 -2 -1 1 154.22 5.01
 2 1 -1 166.86 5.2
 -2 1 1 162.27 5.38
 -2 1 1 157.18 4.7
 -2 1 1 162.18 4.71
 2 1 -1 163.12 4.71
 2 1 -1 162.98 4.85
 -2 1 1 159.16 4.59
 -1 -1 1 202.69 6.11
 1 -1 -1 207.76 5.86
 1 -1 -1 211.18 5.97
 1 -1 -1 219.42 6.15
 -1 -1 1 208.87 6.06
 -1 -1 1 214.83 6
 1 -1 -1 213.22 5.69
 1 1 -1 206.93 6.05
 -1 1 1 213.72 5.93
 -1 1 1 224.07 6.24
 -1 1 1 214.56 6.02
 1 1 -1 212.98 6.17
 0 -1 -1 75.52 2.57
 0 -1 1 76.12 2.34
 0 -1 -1 76.57 2.43
 0 -1 1 78.01 2.37
 0 -1 -1 77.27 2.53
 0 1 -1 80.42 2.39
 0 1 -1 76.89 2.39
 0 1 1 78.99 2.46
 0 1 1 75.03 2.61
 0 1 1 79.08 2.55
 -1 -1 -1 13.21 0.84
 -1 -1 -1 12.73 0.92
 1 -1 1 13.15 0.93
 -1 -1 -1 13.65 0.78
 1 -1 1 13.21 0.59
 -1 1 -1 14.51 0.57
 1 1 1 14.28 0.96
 1 1 1 13.22 0.77
 -1 1 -1 14.16 0.61
 1 1 1 13.15 0.76
 -1 1 -1 11.82 0.9
 1 1 1 14.95 0.87
 2 -1 1 154.98 4.19
 2 -1 1 153.33 4.19
 -2 -1 -1 155.5 5.26
 -2 -1 -1 165.06 4.89
 -2 -1 -1 158.15 4.54
 2 -1 1 149.42 5.43
 2 1 1 153.11 5.25
 2 1 1 157.59 4.72
 2 1 1 162.95 4.87
 2 1 1 162.22 4.71
 -2 1 -1 158.69 4.99
 -2 1 -1 156.86 5.53
 -3 -1 -1 35.69 1.44
 -3 -1 -1 34.73 1.72
 3 -1 1 37.06 1.08
 -3 -1 -1 35.32 2.14
 -3 1 -1 39.38 1.7
 -3 1 -1 33.98 2.37
 3 1 1 38.42 1.71
 -3 1 -1 36.67 1.97
 3 1 1 36.2 2.12
 3 1 1 37.75 1.57
 -4 -1 -1 2.97 0.62
 4 -1 1 4.13 0.27
 -4 -1 -1 2.66 0.82
 -4 -1 -1 3.68 0.49
 4 1 1 5.07 1.02
 -4 1 -1 5.12 0.71
 4 1 1 4.86 0.7
 -4 1 -1 3.06 1.13
 -4 1 -1 4.01 0.84
 -5 -1 -1 11.14 1.65
 -5 -1 -1 10.44 1.21
 -5 -1 -1 7.25 1.78
 5 -1 1 9.13 0.47
 -5 -1 -1 9.19 0.66
 5 1 1 9.38 1.5
 -5 1 -1 10.42 1.98
 -5 1 -1 10.28 1.5
 -5 1 -1 9.76 1.07
 5 1 1 10.33 0.93
 6 -1 1 3.81 0.39
 -6 -1 -1 4.75 1.57
 -6 -1 -1 5.35 1.3
 -6 -1 -1 4.29 0.86
 6 1 1 5.38 1.25
 -6 1 -1 3.79 1.02
 6 1 1 4.52 0.78
 -6 1 -1 3.51 1.31
 -6 1 -1 7.07 0.99
 -7 -1 -1 0 0.78
 -7 -1 -1 0.35 0.69
 7 -1 1 1.21 0.26
 -7 -1 -1 1.55 0.68
 7 1 1 0.77 0.33
 -7 1 -1 0.56 0.46
 -7 1 -1 1.19 1.1
 -7 1 -1 0.64 0.58
 -8 -1 -1 1.71 0.72
 -8 -1 -1 1.81 0.95
 -8 -1 -1 1.88 1.53
 -8 1 -1 1.68 0.64
 -8 1 -1 1.41 1.17
 -8 1 -1 3.18 1.2
 -9 -1 -1 4.58 1.07
 -9 -1 -1 2.41 1.17
 -9 -1 -1 2.43 1.79
 -9 1 -1 4.56 1.9
 -9 1 -1 3.81 1.29
 -9 1 -1 2.66 0.91
 -9 -2 1 10.18 2.05
 -9 -2 1 5.74 1.61
 -9 -2 1 6.57 2.2
 9 -2 -1 4.82 1.22
 -9 2 1 5.5 2.04
 -9 2 1 7.12 0.58
 -9 2 1 7.76 1.56
 -8 -2 1 3.86 0.81
 8 -2 -1 4.72 0.68
 8 -2 -1 4.36 1.14
 -8 -2 1 6.89 1.17
 -8 -2 1 5.89 1.48
 -8 -2 1 4.6 1.89
 -8 2 1 4.29 0.73
 8 2 -1 4.1 0.68
 -8 2 1 4.47 1.15
 -8 2 1 4.84 0.63
 -8 2 1 1.84 1.19
 8 2 -1 6.87 1.04
 -7 -2 1 44.67 3.98
 -7 -2 1 44.1 2.3
 7 -2 -1 39.93 2.57
 7 -2 -1 41.83 1.86
 -7 -2 1 43.4 3.13
 7 -2 -1 40.03 3.66
 -7 -2 1 41.87 2.32
 -7 2 1 37.33 3.46
 7 2 -1 42.62 1.98
 -7 2 1 40.21 1.79
 -7 2 1 45.64 1.97
 7 2 -1 40.06 3.09
 -7 2 1 42.61 2.71
 7 2 -1 42.21 2.26
 6 -2 -1 9.61 1.3
 -6 -2 1 12.11 1.33
 -6 -2 1 9.78 1.64
 -6 -2 1 8.91 1.16
 -6 -2 1 6.74 1.82
 6 -2 -1 9.09 1.99
 6 -2 -1 9.84 0.77
 6 2 -1 9.61 1.16
 -6 2 1 8.45 1.86
 -6 2 1 7.85 0.81
 -6 2 1 11.53 0.85
 6 2 -1 7 1.43
 -6 2 1 12.25 1.54
 6 2 -1 9.19 0.83
 -5 -2 1 12.52 1.09
 -5 -2 1 11.45 1.23
 -5 -2 1 11.11 2.06
 5 -2 -1 12.94 1.36
 -5 -2 1 11.69 1.64
 5 -2 -1 13.55 0.87
 5 -2 -1 9.74 1.87
 5 2 -1 13.24 0.97
 -5 2 1 11.56 1.31
 -5 2 1 11.23 1.9
 -5 2 1 13.61 0.85
 5 2 -1 15.21 1.18
 5 2 -1 13.57 1.81
 4 -2 -1 41.68 1.7
 -4 -2 1 41.09 2.02
 -4 -2 1 44.08 2.55
 -4 -2 1 39.64 2.02
 4 -2 -1 41.72 2.87
 4 -2 -1 41.51 1.96
 -4 -2 1 42.48 3.02
 -4 2 1 45.21 1.74
 4 2 -1 41.1 2.59
 4 2 -1 46.54 2.01
 -4 2 1 44.5 2.86
 -4 2 1 49.95 2.15
 4 2 -1 44.1 2.15
 -3 -2 1 254.64 7.6
 -3 -2 1 245.07 8.01
 -3 -2 1 251.95 7.57
 3 -2 -1 247.51 8.35
 3 -2 -1 249.13 7.15
 3 -2 -1 253.78 7.17
 3 2 -1 267.47 7.87
 -3 2 1 263.18 7.33
 -3 2 1 247.35 7.85
 -3 2 1 261.04 8.53
 3 2 -1 260.54 8.38
 3 2 -1 267.79 7.74
 -3 2 1 256.72 7.4
 2 -2 -1 55.88 2.08
 -2 -2 1 56.41 2.47
 2 -2 -1 54.16 2.5
 -2 -2 1 54.95 2.27
 2 -2 -1 55.14 1.74
 2 2 -1 54.36 2.34
 2 2 -1 59.35 2.35
 -2 2 1 57.55 1.72
 -2 2 1 56.01 2.51
 2 2 -1 54.32 2.48
 -2 2 1 56.76 2.38
 -2 2 1 53.64 2.01
 -1 -2 1 950.27 25.05
 -1 -2 1 924.1 25.37
 1 -2 -1 971.65 25.13
 -1 -2 1 942.33 25.03
 1 -2 -1 923.95 24.93
 1 -2 -1 928.2 25.24
 1 2 -1 936.45 25.5
 -1 2 1 953.82 25.35
 1 2 -1 924.21 25.79
 -1 2 1 961.73 25.68
 -1 2 1 992.23 25.61
 1 2 -1 979.03 25.55
 0 -2 1 379.21 10.36
 0 -2 -1 370.64 10.68
 0 -2 1 369.24 10.09
 0 -2 1 379.51 9.97
 0 -2 -1 368.73 10.26
 0 -2 -1 376.77 10.57
 0 -2 -1 367.46 10.45
 0 2 -1 365.91 10.16
 0 2 -1 388.29 10.55
 0 2 1 385.1 10.44
 0 2 1 392.8 10.67
 0 2 1 364.36 10.59
 0 2 1 391.51 10.85
 0 2 1 369.38 10.78
 0 2 -1 385.7 10.33
 -1 -2 -1 109.54 3.82
 1 -2 1 109.37 3.43
 -1 -2 -1 108.54 3.7
 -1 -2 -1 103.66 3.79
 -1 -2 -1 114.86 3.64
 1 -2 1 106.74 3.58
 1 2 1 111.21 3.79
 -1 2 -1 119.35 3.62
 1 2 1 108.48 3.86
 -1 2 -1 109.29 3.53
 1 2 1 118.08 3.94
 1 2 1 108.43 3.73
 -1 2 -1 112.41 3.5
 2 -2 1 22.35 1.02
 2 -2 1 21.79 1.57
 -2 -2 -1 22.5 1.22
 -2 -2 -1 21.09 1.37
 -2 -2 -1 19.75 1.5
 2 2 1 20.95 1.31
 -2 2 -1 22.94 1.01
 2 2 1 26.19 1.65
 -2 2 -1 23.19 1.55
 2 2 1 23.92 1.36
 2 2 1 24.59 1.41
 -2 2 -1 22.22 0.96
 3 -2 1 215.12 6.1
 3 -2 1 219.3 7.7
 -3 -2 -1 219.15 7.45
 -3 -2 -1 220.16 6.94
 -3 -2 -1 214.79 6.53
 3 2 1 236.99 7
 -3 2 -1 227.85 6.95
 3 2 1 219.95 6.85
 -3 2 -1 230.15 6.09
 -3 2 -1 230.27 5.98
 -3 2 -1 210.9 7.68
 3 2 1 217.73 7.55
 3 2 1 214.08 6.88
 -4 -2 -1 22.03 1.27
 -4 -2 -1 19.92 1.47
 4 -2 1 19.94 0.92
 4 -2 1 25.47 2.74
 -4 -2 -1 20.48 2.2
 4 2 1 20.76 1.34
 4 2 1 21.61 1.38
 4 2 1 20.25 1.79
 -4 2 -1 19.49 1.5
 -4 2 -1 21.62 2.47
 4 2 1 19.1 1.36
 -5 -2 -1 3.59 0.62
 -5 -2 -1 5.53 0.99
 -5 -2 -1 5.56 1.28
 5 -2 1 4.17 0.45
 5 -2 1 4.53 1.39
 -5 2 -1 2.01 1
 5 2 1 4.94 0.82
 -5 2 -1 4.81 1
 -5 2 -1 3.59 0.68
 5 2 1 4.47 1.16
 5 2 1 4.53 0.82
 5 2 1 4.78 0.79
 -6 -2 -1 3.29 0.85
 -6 -2 -1 2.18 0.51
 -6 -2 -1 2.12 1.28
 -6 -2 -1 4.31 1.23
 6 -2 1 2.56 0.36
 -6 2 -1 2.63 0.88
 6 2 1 3.46 0.72
 -6 2 -1 2.88 1.32
 6 2 1 1.95 0.64
 6 2 1 2.28 0.57
 -6 2 -1 4.57 0.83
 6 2 1 0.98 0.69
 -7 -2 -1 0.71 0.82
 -7 -2 -1 1.43 0.74
 7 -2 1 1.46 0.3
 -7 -2 -1 1.67 1.26
 7 2 1 1.55 0.51
 7 2 1 2.57 0.72
 -7 2 -1 0.69 1.02
 -7 2 -1 0.91 0.71
 7 2 1 1.73 0.68
 -7 2 -1 2.04 0.63
 -8 -2 -1 13.02 2.21
 -8 -2 -1 10.52 1.57
 -8 -2 -1 11.33 2.64
 8 2 1 11.54 1.45
 -8 2 -1 10.95 1.85
 8 2 1 12.26 1.42
 -8 2 -1 12.77 2.64
 -8 2 -1 13.51 1.56
 -9 -3 1 3.73 1.35
 9 -3 -1 3.37 0.95
 -9 -3 1 4.97 2.02
 -9 3 1 5.2 1.23
 -9 3 1 6.66 2.04
 8 -3 -1 2.36 0.82
 -8 -3 1 2.6 1.11
 -8 -3 1 2.52 1.49
 -8 -3 1 5.53 1.14
 -8 3 1 3.99 0.74
 -8 3 1 3.41 1.52
 8 3 -1 3.51 0.74
 8 3 -1 3.99 0.91
 -8 3 1 2.71 0.81
 -8 3 1 2.9 0.59
 -8 3 1 3.24 0.56
 -7 -3 1 53.39 2.75
 -7 -3 1 52.49 3.57
 -7 -3 1 51.2 4.32
 7 -3 -1 49.56 2.23
 -7 -3 1 44.6 2.68
 7 -3 -1 51 2.73
 7 -3 -1 53.43 4.24
 7 3 -1 58.93 2.61
 -7 3 1 53.93 2.38
 -7 3 1 53.92 2.17
 -7 3 1 53.31 2.95
 -7 3 1 53.76 4.06
 7 3 -1 54.74 2.87
 -7 3 1 55.45 2.34
 -6 -3 1 25.73 2.79
 6 -3 -1 21.06 1.3
 -6 -3 1 20.15 1.59
 -6 -3 1 19.03 2.93
 6 -3 -1 18.5 2.75
 -6 -3 1 22.52 1.73
 6 -3 -1 22.68 1.56
 -6 3 1 24.18 2.95
 6 3 -1 16.73 2.35
 6 3 -1 17.12 1.52
 -6 3 1 24.6 1.69
 -6 3 1 21.43 1.18
 6 3 -1 22.96 1.5
 5 -3 -1 10.52 1.1
 -5 -3 1 9.95 1.34
 5 -3 -1 10.76 1.96
 -5 -3 1 11.51 1.76
 -5 -3 1 10.64 2.02
 5 -3 -1 8.25 0.9
 -5 -3 1 9.89 1.3
 5 3 -1 10.57 1.23
 -5 3 1 9.06 0.74
 -5 3 1 14.46 2.11
 5 3 -1 10.57 1.69
 5 3 -1 10.44 1.31
 -5 3 1 11.38 1.18
 4 -3 -1 91.62 3.05
 -4 -3 1 88.33 3.62
 -4 -3 1 90.09 3.75
 4 -3 -1 86.82 4.35
 -4 -3 1 83.82 4.02
 4 -3 -1 88.66 3.22
 4 3 -1 90.02 3.73
 -4 3 1 93.01 3.14
 -4 3 1 94.63 3.2
 -4 3 1 85.28 3.86
 4 3 -1 95.83 3.7
 -4 3 1 97.89 4.48
 4 3 -1 91.22 4.37
 -3 -3 1 30.26 1.92
 -3 -3 1 25.79 1.89
 3 -3 -1 31.92 1.6
 3 -3 -1 29.68 1.13
 -3 -3 1 29.97 1.78
 3 -3 -1 29.76 2.08
 -3 3 1 35.05 2.16
 3 3 -1 30.07 2.07
 3 3 -1 31.08 1.85
 -3 3 1 32.04 2.01
 -3 3 1 29.77 1.15
 -3 3 1 31.95 1.67
 -3 3 1 33.08 1.52
 3 3 -1 32.56 1.92
 -2 -3 1 9.69 1.26
 2 -3 -1 13.63 1.48
 -2 -3 1 10.84 1.19
 2 -3 -1 13.71 1.44
 2 -3 -1 10.34 0.91
 -2 -3 1 12.79 1.14
 2 3 -1 15.61 1.57
 -2 3 1 12.15 1.12
 -2 3 1 11.61 0.91
 -2 3 1 10.55 1.11
 2 3 -1 11.56 1.33
 -2 3 1 14.07 1.5
 2 3 -1 13.24 1.13
 -1 -3 1 21.91 1.71
 1 -3 -1 21.99 1.64
 1 -3 -1 22.53 1.38
 -1 -3 1 22.95 1.43
 1 -3 -1 23.16 1.42
 -1 -3 1 23.04 1.37
 1 -3 -1 23.12 0.98
 1 3 -1 23.06 1.4
 -1 3 1 23.91 1.48
 1 3 -1 27.35 1.58
 -1 3 1 23.86 1.4
 -1 3 1 25.62 1.68
 -1 3 1 23.81 1.46
 1 3 -1 23.66 1.74
 0 -3 1 84.75 2.81
 0 -3 -1 83.92 3.18
 0 -3 -1 82.08 3.5
 0 -3 -1 88.36 3.33
 0 -3 1 85.99 2.83
 0 -3 -1 88.76 3.02
 0 -3 -1 79.77 3.25
 0 -3 1 83.54 3.16
 0 3 1 76.5 3.31
 0 3 1 85.92 3.32
 0 3 -1 87.98 2.96
 0 3 1 88.29 3.04
 0 3 1 87.64 3.56
 0 3 -1 94.7 3.42
 0 3 -1 82.69 2.91
 0 3 -1 83.91 3.73
 0 3 1 94.86 3.39
 1 -3 1 42.78 1.96
 -1 -3 -1 45.42 2.21
 1 -3 1 46.86 1.93
 -1 -3 -1 46.34 2.38
 -1 -3 -1 42.69 2.13
 -1 -3 -1 42.29 2.06
 -1 3 -1 46.19 1.66
 -1 3 -1 45.87 1.88
 1 3 1 48.84 2.41
 1 3 1 44.74 2.23
 -1 3 -1 50.39 2.09
 1 3 1 43.96 2.19
 -1 3 -1 42.99 2.03
 1 3 1 47.83 2.24
 -2 -3 -1 48.84 2.55
 2 -3 1 50.1 2.12
 2 -3 1 53.37 2.1
 -2 -3 -1 47.32 2.54
 -2 -3 -1 47.16 2.24
 2 -3 1 52.24 2.52
 -2 3 -1 52.6 2.13
 2 3 1 50.43 2.48
 2 3 1 59.1 2.64
 -2 3 -1 52.73 2.16
 2 3 1 57.4 2.67
 -2 3 -1 58.71 2.54
 2 3 1 54.02 2.73
 -3 -3 -1 20.69 1.74
 3 -3 1 18.25 1.12
 -3 -3 -1 21.55 1.41
 -3 -3 -1 21.43 1.61
 3 -3 1 17.79 1.65
 3 3 1 23.41 1.85
 3 3 1 22.51 1.56
 3 3 1 21.39 1.53
 -3 3 -1 20.84 1.13
 -3 3 -1 21.8 1.04
 -3 3 -1 22.36 1.73
 -3 3 -1 22.34 1.29
 3 3 1 20.19 1.47
 -4 -3 -1 1.34 0.47
 4 -3 1 0.76 0.67
 4 -3 1 -0.05 0.12
 -4 -3 -1 0.38 0.43
 -4 -3 -1 2.09 0.83
 -4 3 -1 0.92 0.47
 -4 3 -1 1.49 0.33
 4 3 1 1.17 0.67
 4 3 1 1.84 0.56
 -4 3 -1 1.1 0.65
 -4 3 -1 0.96 0.21
 4 3 1 1.14 0.45
 4 3 1 0.31 0.36
 -5 -3 -1 4.47 1.2
 5 -3 1 5.32 1.41
 5 -3 1 4.88 0.62
 -5 -3 -1 5.53 1.13
 -5 -3 -1 6.27 0.93
 5 3 1 5.73 0.96
 5 3 1 3.49 1.09
 5 3 1 6.08 1.02
 5 3 1 3.92 0.93
 -5 3 -1 5.76 1.04
 -5 3 -1 4.32 1.23
 6 -3 1 8.79 0.71
 -6 -3 -1 8.82 1.11
 -6 -3 -1 6.84 1.56
 6 -3 1 7.21 1.8
 -6 -3 -1 7.92 1.34
 6 3 1 8.78 1.27
 6 3 1 9.47 1.27
 6 3 1 11.47 1.45
 -6 3 -1 5.28 1.48
 -6 3 -1 11.46 1.34
 -6 3 -1 11.23 1.54
 -7 -3 -1 0.93 0.78
 -7 -3 -1 1.41 0.48
 -7 -3 -1 2.06 1.37
 -7 -3 -1 0.41 0.54
 7 -3 1 0.48 0.27
 7 3 1 1.73 0.63
 -7 3 -1 0.96 0.99
 -7 3 -1 0.76 0.63
 7 3 1 0.27 0.47
 -7 3 -1 0.35 0.45
 7 3 1 0.73 0.62
 -8 -3 -1 2.17 0.9
 -8 -3 -1 1.19 0.95
 -8 -3 -1 3 1.71
 -8 3 -1 0.76 1
 -8 3 -1 1.09 0.78
 8 3 1 1.53 0.62
 -8 3 -1 0.73 0.54
 -9 -4 1 4.87 1.61
 -9 4 1 1.99 1.33
 -8 -4 1 2.45 1.18
 -8 -4 1 4.62 1.16
 -8 -4 1 3.78 1.65
 8 4 -1 1.85 0.8
 8 4 -1 2.74 0.77
 -8 4 1 5.42 1.63
 -8 4 1 3.51 0.93
 -8 4 1 3.94 0.78
 -8 4 1 2.98 0.61
 7 -4 -1 9.89 1.15
 -7 -4 1 12.39 1.6
 -7 -4 1 7.76 1.71
 -7 -4 1 10.25 1.61
 -7 -4 1 9.62 2.36
 -7 4 1 12 1.25
 -7 4 1 13.14 1.5
 -7 4 1 12.89 2.33
 7 4 -1 12.68 1.54
 -7 4 1 12.08 0.92
 7 4 -1 10.8 1.54
 -6 -4 1 11.95 1.89
 6 -4 -1 8.77 1.88
 -6 -4 1 10.14 1.5
 -6 -4 1 8.2 2.08
 -6 -4 1 12.13 1.52
 6 -4 -1 6.77 0.95
 -6 4 1 9.87 1.95
 -6 4 1 10.47 1.63
 -6 4 1 11.63 0.89
 6 4 -1 7.46 1.63
 6 4 -1 12.8 1.46
 6 4 -1 11.04 1.47
 -6 4 1 10.91 1.23
 -6 4 1 13.39 1.14
 -5 -4 1 29.68 2.02
 5 -4 -1 28.86 1.7
 -5 -4 1 27.07 2.31
 5 -4 -1 30.18 2.63
 -5 -4 1 25.32 2.04
 -5 4 1 27.53 2.21
 -5 4 1 29.7 1.52
 5 4 -1 29.96 2.08
 5 4 -1 32.41 2.6
 5 4 -1 35.19 2.16
 -5 4 1 29.3 1.51
 -5 4 1 29.95 2.5
 -5 4 1 29.17 1.76
 -4 -4 1 40.85 2.63
 4 -4 -1 34.99 1.94
 -4 -4 1 37.24 2.45
 4 -4 -1 36.49 2.64
 -4 -4 1 40.81 2.35
 4 4 -1 38.65 2.34
 -4 4 1 39.17 1.42
 -4 4 1 38.7 2.61
 4 4 -1 39.49 2.36
 4 4 -1 41.23 2.75
 -4 4 1 35.28 2.01
 -4 4 1 34.81 2.44
 -4 4 1 38.37 1.82
 -3 -4 1 280.74 8.67
 3 -4 -1 262.12 8.89
 -3 -4 1 262.37 8.82
 3 -4 -1 265.9 8.28
 -3 4 1 301.06 9.15
 3 4 -1 302.91 9.68
 3 4 -1 286.39 9.41
 -3 4 1 281.63 9.71
 -3 4 1 306.82 9.66
 3 4 -1 311.94 9.92
 -3 4 1 295.82 8.85
 2 -4 -1 7.02 1
 2 -4 -1 9.14 1.46
 -2 -4 1 7.65 1.11
 -2 -4 1 7.34 1.09
 -2 -4 1 9.35 1.49
 2 -4 -1 12.14 1.42
 -2 4 1 7.08 1.19
 -2 4 1 10.54 1.18
 -2 4 1 6.05 0.95
 -2 4 1 8.99 1.2
 2 4 -1 9.29 1.27
 2 4 -1 8.24 1.18
 2 4 -1 7.83 1.29
 1 -4 -1 12.24 1.36
 1 -4 -1 15.14 0.85
 1 -4 -1 15.59 1.82
 -1 -4 1 12.19 1.05
 1 -4 -1 14.14 1.2
 -1 -4 1 13.76 1.13
 -1 -4 1 10.98 1.6
 -1 -4 1 15.07 1.27
 -1 4 1 15.49 1.26
 -1 4 1 16.44 1.79
 1 4 -1 13.57 1.69
 1 4 -1 15.73 1.25
 1 4 -1 14.52 1.51
 -1 4 1 14.24 1.47
 -1 4 1 14.68 1.27
 1 4 -1 15.13 1.66
 0 -4 -1 85.12 3.47
 0 -4 -1 90.77 3.25
 0 -4 -1 88.38 3.58
 0 -4 1 83.74 3.46
 0 -4 1 86.28 3.12
 0 -4 -1 91.54 3.69
 0 -4 -1 89.42 4.05
 0 -4 1 82.05 2.99
 0 4 -1 91 3.61
 0 4 1 90.97 3.99
 0 4 1 94.6 3.75
 0 4 1 88.4 3.75
 0 4 -1 86.28 3.64
 0 4 1 96.57 3.31
 0 4 1 85.4 3.6
 0 4 -1 82.25 3.22
 0 4 -1 83.99 4.09
 0 4 -1 86.97 3.18
 -1 -4 -1 35.36 2.02
 -1 -4 -1 35.2 2.19
 1 -4 1 39.03 2.01
 -1 -4 -1 40.68 2.14
 -1 -4 -1 37 2.19
 1 -4 1 38.73 1.84
 -1 4 -1 40.23 2.12
 1 4 1 42.94 2.51
 -1 4 -1 40.86 2.15
 1 4 1 38.83 2.27
 -1 4 -1 40.85 1.91
 -1 4 -1 41.76 1.66
 -1 4 -1 40.56 2.69
 1 4 1 39.73 2.28
 1 4 1 40.91 2.2
 2 -4 1 97.24 3.86
 -2 -4 -1 85.37 3.95
 -2 -4 -1 95.03 3.82
 2 -4 1 102.45 3.76
 2 -4 1 99.73 3.63
 -2 -4 -1 92.9 4.2
 -2 4 -1 107.69 3.9
 -2 4 -1 104.88 3.92
 -2 4 -1 108.23 3.85
 2 4 1 106.05 4.31
 2 4 1 99.87 4.31
 -2 4 -1 104.97 3.23
 2 4 1 105.06 4.26
 2 4 1 98.81 4.33
 -3 -4 -1 11.28 1.33
 3 -4 1 10.83 1.14
 -3 -4 -1 12.83 1.68
 3 -4 1 13.94 1.75
 3 -4 1 11.51 1.22
 -3 -4 -1 10.55 1.54
 3 4 1 13.2 1.74
 3 4 1 13.79 1.6
 -3 4 -1 13.75 1.06
 -3 4 -1 12.22 0.94
 3 4 1 15.37 1.72
 -3 4 -1 12.82 0.9
 -3 4 -1 13.01 1.57
 3 4 1 10.03 1.37
 -4 -4 -1 3.46 0.92
 -4 -4 -1 5.05 1.17
 4 -4 1 4.27 1.16
 -4 -4 -1 4.03 0.86
 4 -4 1 3.39 0.66
 -4 4 -1 2.81 0.47
 4 4 1 5 1.05
 4 4 1 2.83 0.8
 -4 4 -1 4.35 0.67
 4 4 1 3.8 1.08
 -4 4 -1 4.53 1.08
 4 4 1 3.88 0.96
 -4 4 -1 3.79 0.7
 -5 -4 -1 3.86 1.16
 5 -4 1 1.05 0.82
 -5 -4 -1 3.45 0.82
 5 -4 1 0.6 0.31
 -5 -4 -1 1.23 0.73
 5 4 1 4.86 1.08
 -5 4 -1 3.61 0.44
 -5 4 -1 3.93 1.23
 5 4 1 2.98 0.89
 -5 4 -1 3.55 0.81
 5 4 1 2.26 0.71
 5 4 1 3.01 1.04
 -5 4 -1 3.19 0.51
 -6 -4 -1 19.66 2.23
 6 -4 1 16.74 2.55
 -6 -4 -1 18.31 1.52
 -6 -4 -1 15.51 2.34
 6 -4 1 19.01 1.26
 -6 4 -1 19.85 1.69
 -6 4 -1 17.98 0.68
 6 4 1 16.68 1.83
 -6 4 -1 19.25 0.73
 -6 4 -1 19.21 2.64
 6 4 1 17.04 1.98
 6 4 1 18.21 1.61
 -7 -4 -1 11.45 2.71
 -7 -4 -1 10.22 1.99
 -7 -4 -1 8.87 1.59
 -7 4 -1 9.79 1.52
 -7 4 -1 10.12 2.1
 7 4 1 8.52 1.35
 7 4 1 11.56 1.54
 -7 4 -1 11.28 1.43
 -8 -4 -1 3.13 1.13
 -8 -4 -1 5.11 1.6
 -8 -4 -1 5.62 2.16
 -8 4 -1 4.49 1.13
 8 4 1 4.81 1.07
 -8 4 -1 5.83 1.07
 -8 4 -1 6.34 1.82
 -8 -5 1 6.69 1.68
 -8 -5 1 6.59 1.43
 -8 -5 1 5.24 1.96
 8 5 -1 10.71 1.96
 -8 5 1 10.17 1.87
 8 5 -1 10.57 1.53
 -8 5 1 12.21 2.5
 -8 5 1 9.65 1.19
 -7 -5 1 12.59 2.71
 7 -5 -1 13.13 1.45
 -7 -5 1 12.55 2.19
 -7 -5 1 10.77 1.72
 -7 -5 1 11.05 1.67
 -7 5 1 14.95 2.48
 7 5 -1 14.68 1.92
 -7 5 1 12.79 1.01
 -7 5 1 12.98 2.03
 -7 5 1 12.3 1.29
 7 5 -1 11.21 1.58
 -7 5 1 14.19 1.48
 6 -5 -1 8.49 1.2
 -6 -5 1 9.59 1.49
 -6 -5 1 8.34 1.59
 -6 -5 1 6.96 1.55
 6 -5 -1 9.92 2.03
 -6 5 1 9.75 1.76
 -6 5 1 9.25 0.82
 -6 5 1 8.32 1.16
 6 5 -1 11.05 1.63
 -6 5 1 8.31 1.8
 6 5 -1 6.58 1.22
 -6 5 1 8.94 0.99
 -5 -5 1 4.4 1.21
 -5 -5 1 4.93 1.22
 -5 -5 1 3.7 0.94
 5 -5 -1 4.4 1.25
 5 -5 -1 4.68 0.89
 5 5 -1 2.91 1.05
 5 5 -1 4.13 1.06
 5 5 -1 4.61 1.04
 -5 5 1 3.17 1.05
 -5 5 1 5.77 1.03
 -5 5 1 4.87 1.28
 -5 5 1 4.07 0.7
 -5 5 1 4.02 0.43
 4 -5 -1 11.51 1.83
 -4 -5 1 13.71 1.89
 -4 -5 1 13.09 1.83
 -4 -5 1 13.08 1.66
 4 -5 -1 12.73 1.45
 -4 5 1 12.78 1.11
 4 5 -1 15.86 2.08
 4 5 -1 12.81 1.7
 -4 5 1 13.61 1.51
 4 5 -1 11.84 1.69
 -4 5 1 10.97 1.76
 -4 5 1 15.47 1.96
 -3 -5 1 22.41 2.47
 -3 -5 1 25.75 1.91
 -3 -5 1 25.12 1.96
 3 -5 -1 22.34 1.67
 3 -5 -1 23.78 1.92
 3 5 -1 27.59 2.17
 -3 5 1 30.66 1.96
 -3 5 1 25.48 2.21
 3 5 -1 25.06 1.98
 -3 5 1 27.67 1.73
 -3 5 1 28.27 2.04
 3 5 -1 22.32 1.99
 -2 -5 1 55.04 3.36
 2 -5 -1 56.81 2.9
 -2 -5 1 62.43 3.01
 2 -5 -1 53.94 3.33
 -2 -5 1 54.81 2.93
 2 -5 -1 62.08 3
 2 5 -1 65.25 3.3
 2 5 -1 65.91 3.56
 2 5 -1 61.28 3.15
 -2 5 1 60.13 3.06
 -2 5 1 61.29 2.92
 2 5 -1 58.82 3.28
 -2 5 1 59.78 3.45
 -2 5 1 64.05 3.1
 1 -5 -1 35.45 2.54
 -1 -5 1 27.07 1.75
 1 -5 -1 31.96 1.98
 -1 -5 1 24.25 2.22
 1 -5 -1 31.29 1.96
 -1 -5 1 33.46 2.1
 -1 -5 1 28.93 1.78
 1 -5 -1 32.64 1.46
 1 -5 -1 31.81 2.08
 -1 5 1 38 2.59
 1 5 -1 35.2 2.58
 -1 5 1 33.08 2.12
 1 5 -1 35.45 2.26
 -1 5 1 34.68 2.22
 -1 5 1 36.23 2.24
 -1 5 1 37.25 1.59
 1 5 -1 37.63 2.4
 1 5 -1 35.1 2.07
 0 -5 -1 22.48 1.79
 0 -5 1 24.09 1.73
 0 -5 1 23.4 1.47
 0 -5 1 26.75 1.43
 0 -5 -1 25.1 1.52
 0 -5 -1 23.46 1.72
 0 -5 -1 23.69 1.72
 0 5 -1 25.09 1.52
 0 5 -1 31.24 2.06
 0 5 1 25.29 1.91
 0 5 1 24.53 1.52
 0 5 1 24.66 1.85
 0 5 -1 25.67 2.24
 0 5 -1 26.89 1.86
 0 5 1 24.65 2.09
 -1 -5 -1 12.99 1.66
 -1 -5 -1 16.54 2.05
 1 -5 1 18.42 1.43
 -1 -5 -1 15.57 1.35
 1 -5 1 15.56 1.22
 1 -5 1 15.98 0.9
 -1 -5 -1 18.37 1.51
 -1 -5 -1 16.55 1.85
 1 5 1 16.36 1.87
 -1 5 -1 16.24 1.04
 1 5 1 18.62 2.12
 -1 5 -1 18.71 2.34
 -1 5 -1 16.85 1.47
 1 5 1 20.07 1.72
 1 5 1 19.77 1.54
 -1 5 -1 18.28 1.49
 -1 5 -1 17.56 1.31
 2 -5 1 4.75 0.9
 2 -5 1 5.49 1
 2 -5 1 5.88 1.04
 -2 -5 -1 6.38 1.11
 -2 -5 -1 6.46 1.18
 -2 -5 -1 8.52 1.52
 -2 5 -1 9.98 1.29
 2 5 1 9.71 1.45
 -2 5 -1 7.37 1.08
 -2 5 -1 7.83 1.54
 2 5 1 8.82 1.45
 2 5 1 7.5 1.31
 2 5 1 5.33 1.14
 -2 5 -1 7.69 0.61
 -2 5 -1 7.67 1.11
 -3 -5 -1 7.51 1.35
 3 -5 1 9.07 1.42
 3 -5 1 9.75 1.26
 3 -5 1 11.71 1.27
 -3 -5 -1 10.55 1.43
 -3 -5 -1 9.19 1.6
 -3 5 -1 10.55 0.68
 -3 5 -1 10.74 1.42
 3 5 1 13.17 1.73
 3 5 1 11.72 1.65
 -3 5 -1 9.26 1.18
 3 5 1 8.8 1.47
 3 5 1 8.32 1.46
 -3 5 -1 10.89 1.2
 4 -5 1 16.05 2.13
 -4 -5 -1 15.33 2.08
 -4 -5 -1 13.8 1.7
 -4 -5 -1 19.42 2.34
 4 -5 1 17.14 1.37
 -4 5 -1 18.5 2.1
 -4 5 -1 18.44 1.19
 4 5 1 16.94 2.24
 -4 5 -1 19 1.39
 -4 5 -1 19.78 1.25
 4 5 1 16.98 2.02
 4 5 1 19.22 2.11
 4 5 1 21.08 1.89
 -5 -5 -1 13.09 2.07
 5 -5 1 14.13 1.23
 5 -5 1 12.69 2.16
 -5 -5 -1 12.39 1.54
 -5 -5 -1 13.29 1.93
 -5 5 -1 14.66 1.13
 5 5 1 13.64 1.77
 -5 5 -1 15.91 1.26
 5 5 1 14.96 1.9
 -5 5 -1 14.05 0.93
 5 5 1 13.94 1.89
 -5 5 -1 16.35 2.22
 -6 -5 -1 0.06 0.42
 -6 -5 -1 -0.27 0.58
 -6 -5 -1 0.76 0.82
 6 -5 1 1.6 1
 6 -5 1 0.96 0.46
 6 5 1 0.76 0.68
 -6 5 -1 0.29 0.24
 -6 5 -1 0.4 0.48
 6 5 1 0.62 0.62
 -6 5 -1 0.09 0.67
 -6 5 -1 0.98 0.37
 -7 -5 -1 2.6 1.05
 -7 -5 -1 1.9 0.97
 -7 5 -1 2.4 0.76
 7 5 1 2.36 0.84
 7 5 1 0.72 0.71
 -7 5 -1 0.96 0.99
 -8 -5 -1 0.57 0.75
 -8 5 -1 0.83 0.64
 -8 5 -1 0.88 1.1
 -8 -6 1 2.01 1.53
 -8 -6 1 4.14 1.41
 -8 -6 1 3.42 1.27
 8 6 -1 3.11 1.01
 -8 6 1 4.53 1.68
 -8 6 1 2.93 0.84
 -7 -6 1 4.7 1.16
 -7 -6 1 6.95 1.65
 -7 -6 1 3.83 1.29
 7 6 -1 8.89 1.57
 -7 6 1 4.74 1.43
 -7 6 1 5.61 1.08
 -7 6 1 5.76 1.57
 7 6 -1 5.26 1.27
 -6 -6 1 9.09 1.59
 6 -6 -1 8.71 1.9
 6 -6 -1 8.69 1.32
 -6 -6 1 8.06 1.71
 -6 -6 1 9.8 1.87
 -6 6 1 11.05 1.99
 -6 6 1 9.91 1.92
 -6 6 1 8.85 1.07
 -6 6 1 9.37 1.37
 6 6 -1 6.88 1.38
 6 6 -1 8.88 1.6
 -5 -6 1 7.93 1.65
 5 -6 -1 8.18 1.31
 -5 -6 1 8.05 1.43
 5 -6 -1 8.41 1.72
 -5 -6 1 10.74 1.83
 -5 6 1 10 1.92
 5 6 -1 5.73 1.24
 -5 6 1 8.41 1.13
 -5 6 1 6.64 1.43
 5 6 -1 11.36 2.34
 -5 6 1 11.73 1.57
 5 6 -1 7.49 1.51
 -4 -6 1 37.15 2.97
 4 -6 -1 39.29 2.86
 -4 -6 1 44.41 2.93
 -4 -6 1 39.44 2.66
 4 -6 -1 42.36 2.55
 4 6 -1 42.42 3.1
 -4 6 1 41.54 2.82
 4 6 -1 40.11 2.97
 -4 6 1 47.99 2.75
 -4 6 1 42.06 2.33
 4 6 -1 45.49 2.95
 -4 6 1 38.77 3.04
 4 6 -1 42.71 3
 -3 -6 1 67.3 3.54
 3 -6 -1 67.02 3.54
 3 -6 -1 67.55 3.41
 -3 -6 1 67.3 4
 -3 -6 1 58.44 3.35
 -3 6 1 76.49 3.42
 3 6 -1 73.07 4.07
 3 6 -1 70.77 3.85
 3 6 -1 67.38 3.95
 3 6 -1 69.59 3.76
 -3 6 1 72.45 4.16
 -3 6 1 71.17 3.57
 -3 6 1 72.38 3.71
 2 -6 -1 4.61 1.28
 -2 -6 1 5.73 1.11
 -2 -6 1 3.76 0.9
 -2 -6 1 5.82 1.08
 2 -6 -1 4.86 1.06
 2 -6 -1 4.85 1.03
 -2 -6 1 5.7 1.42
 2 -6 -1 5.05 0.36
 -2 6 1 7.55 1.32
 2 6 -1 5.02 1.19
 2 6 -1 5.58 1.36
 -2 6 1 5.33 1.32
 2 6 -1 4.45 1.12
 2 6 -1 7.26 1.27
 -2 6 1 6.47 1.15
 -2 6 1 5.79 1.16
 1 -6 -1 40.49 2.58
 -1 -6 1 38.18 3
 1 -6 -1 40.58 2.43
 1 -6 -1 38.94 1.8
 -1 -6 1 39.43 2.26
 1 -6 -1 44.07 2.52
 -1 -6 1 39.48 2.5
 1 -6 -1 40.14 3.01
 -1 -6 1 39.36 2.2
 1 6 -1 40.89 2.77
 -1 6 1 45.25 1.97
 1 6 -1 46.71 3.23
 -1 6 1 47.42 2.75
 -1 6 1 46.69 3.15
 1 6 -1 46.75 2.56
 1 6 -1 41.23 2.7
 -1 6 1 46.86 2.79
 -1 6 1 45.66 2.8
 0 -6 -1 7.2 1.59
 0 -6 1 7.09 1.02
 0 -6 -1 5.14 1.04
 0 -6 1 8.22 0.96
 0 -6 -1 6.05 0.94
 0 -6 1 7.18 1.2
 0 -6 -1 7.12 1.22
 0 -6 -1 8.6 1.45
 0 6 -1 10.44 1.57
 0 6 1 9.33 1.51
 0 6 -1 8.96 1.14
 0 6 1 7.76 1.52
 0 6 -1 5.59 1.32
 0 6 1 9.11 1.15
 0 6 -1 8.61 1.38
 0 6 1 6.48 1.25
 -1 -6 -1 2.94 0.89
 1 -6 1 2.99 0.48
 1 -6 1 2.56 0.66
 1 -6 1 3.31 0.8
 -1 -6 -1 2.84 0.9
 -1 -6 -1 1.7 0.87
 -1 -6 -1 2.93 0.85
 -1 -6 -1 2.54 0.75
 -1 6 -1 3.62 0.94
 1 6 1 3.08 1.01
 1 6 1 2.65 0.75
 -1 6 -1 3.83 0.96
 1 6 1 4.46 1.16
 -1 6 -1 2.96 1.05
 -1 6 -1 4.19 0.67
 1 6 1 3.31 0.97
 -1 6 -1 2.99 0.78
 -2 -6 -1 1.41 0.75
 -2 -6 -1 1.71 0.71
 2 -6 1 1.68 0.64
 2 -6 1 0.54 0.41
 -2 -6 -1 0.59 0.51
 -2 -6 -1 1.24 0.65
 -2 6 -1 1.27 0.61
 2 6 1 0.73 0.59
 -2 6 -1 1.27 0.61
 2 6 1 1.22 0.76
 2 6 1 1.8 0.83
 2 6 1 0.45 0.51
 -2 6 -1 0.3 0.57
 -2 6 -1 1.44 0.36
 -2 6 -1 1.27 0.62
 -3 -6 -1 29.13 2.55
 -3 -6 -1 27.71 2.12
 -3 -6 -1 35.11 2.55
 3 -6 1 32.38 2.04
 3 -6 1 31.58 2.16
 3 -6 1 27.54 2.18
 -3 6 -1 30.01 1.95
 -3 6 -1 31.55 2.09
 -3 6 -1 25.94 3.07
 3 6 1 31.31 2.45
 -3 6 -1 34.17 2.2
 3 6 1 32.98 2.54
 -3 6 -1 31.92 1.3
 3 6 1 30.51 2.42
 3 6 1 28.56 2.41
 4 -6 1 3.65 1.12
 -4 -6 -1 5.18 1.37
 -4 -6 -1 3.72 1.16
 -4 -6 -1 3.46 0.95
 4 -6 1 1.57 0.61
 -4 6 -1 3.71 0.97
 4 6 1 3.91 1.25
 -4 6 -1 3.31 1.17
 4 6 1 3.04 0.95
 -4 6 -1 4.31 0.51
 -4 6 -1 3.5 0.75
 -4 6 -1 3.91 0.56
 -4 6 -1 3.96 0.9
 4 6 1 3.45 1.01
 4 6 1 3.5 1.2
 -5 -6 -1 8.5 1.76
 -5 -6 -1 7.77 1.35
 5 -6 1 8.34 1.79
 5 -6 1 6.28 1.11
 -5 -6 -1 8.08 1.72
 -5 6 -1 9.24 1.21
 -5 6 -1 9.79 1.02
 -5 6 -1 10.23 1.07
 5 6 1 9.03 1.6
 5 6 1 8.43 1.56
 -5 6 -1 7.12 1.48
 -6 -6 -1 4.84 1.44
 6 -6 1 2.64 1.28
 -6 -6 -1 3.61 1.27
 -6 -6 -1 5.88 1.24
 6 6 1 4.74 1.23
 -6 6 -1 6.34 1.6
 -6 6 -1 6.35 0.95
 -6 6 -1 4.83 0.85
 -7 -6 -1 3.92 1.28
 -7 -6 -1 3.75 1.34
 -7 6 -1 3.38 1.28
 -7 6 -1 5.52 0.68
 -7 -7 1 8.91 1.91
 -7 -7 1 3.71 1.39
 -7 7 1 6.34 1.61
 7 7 -1 7.29 1.56
 -7 7 1 5.65 1.15
 6 -7 -1 0.46 0.51
 -6 -7 1 0.24 0.67
 -6 -7 1 -0.23 0.67
 -6 -7 1 1.41 0.83
 6 7 -1 -0.18 0.49
 -6 7 1 2.81 1.29
 -6 7 1 1.65 0.88
 -6 7 1 1.9 0.79
 5 -7 -1 24.84 3.04
 5 -7 -1 22.51 1.96
 -5 -7 1 25.9 2.71
 -5 -7 1 22.24 2.68
 -5 -7 1 19.86 2.77
 -5 7 1 19.69 2.76
 -5 7 1 24.16 2.06
 -5 7 1 23.66 1.74
 -5 7 1 25.34 2.35
 5 7 -1 21.62 2.59
 5 7 -1 22.16 2.67
 -4 -7 1 44.01 3.03
 -4 -7 1 43.86 3.41
 4 -7 -1 42.34 2.74
 4 -7 -1 35.66 2.86
 -4 -7 1 39.02 2.77
 4 7 -1 46.57 3.19
 -4 7 1 50.17 3.05
 -4 7 1 45.43 3.46
 -4 7 1 48.45 3.18
 4 7 -1 47.53 3.41
 -4 7 1 41.65 2.54
 4 7 -1 45.39 3.35
 3 -7 -1 9.14 1.49
 3 -7 -1 10.44 1.69
 -3 -7 1 9.59 1.58
 -3 -7 1 9.88 1.62
 -3 -7 1 12.7 2.23
 -3 7 1 12.03 1.63
 -3 7 1 14.46 1.98
 3 7 -1 15.85 2.21
 3 7 -1 12.61 1.98
 -3 7 1 11.99 2.17
 -3 7 1 9.96 1.62
 3 7 -1 11.98 2
 3 7 -1 10.51 1.75
 -2 -7 1 34.47 2.46
 2 -7 -1 30.32 1.18
 2 -7 -1 28.81 2.18
 -2 -7 1 30.2 2.19
 -2 -7 1 28.29 2.13
 -2 -7 1 32.99 3.61
 2 -7 -1 29.78 2.35
 -2 7 1 36.56 2.47
 -2 7 1 34.67 2.52
 2 7 -1 30.69 2.52
 2 7 -1 36.72 2.99
 -2 7 1 31.14 2.46
 2 7 -1 33.72 2.7
 2 7 -1 34.09 2.49
 -2 7 1 40.39 3.13
 1 -7 -1 11.42 1.76
 -1 -7 1 11.15 1.45
 1 -7 -1 9.89 1.49
 -1 -7 1 9.04 1.97
 -1 -7 1 10.33 1.56
 1 -7 -1 9.61 1.01
 1 -7 -1 8.5 1.39
 -1 -7 1 10.72 1.36
 1 -7 -1 9.54 1.93
 1 7 -1 11.24 1.79
 1 7 -1 9.45 1.62
 -1 7 1 12.46 1.83
 -1 7 1 10.53 1.67
 -1 7 1 16.01 1.95
 1 7 -1 10.78 1.99
 1 7 -1 10.64 1.5
 -1 7 1 11.56 2.03
 -1 7 1 11.38 0.97
 0 -7 -1 8.43 1.15
 0 -7 1 7.44 1.3
 0 -7 -1 5.61 1.55
 0 -7 1 7.54 0.98
 0 -7 -1 7.15 1.28
 0 -7 -1 6.1 1.35
 0 -7 -1 9.3 1.45
 0 -7 1 6.56 1.08
 0 7 -1 9.58 1.55
 0 7 -1 5.28 1.49
 0 7 1 9.75 1.59
 0 7 -1 10.12 1.69
 0 7 1 10.65 1.95
 0 7 1 7.42 1.1
 0 7 1 5.68 1.32
 0 7 -1 9.79 1.26
 1 -7 1 6.47 0.76
 -1 -7 -1 7.08 1.17
 1 -7 1 5.79 1.01
 -1 -7 -1 6.23 1.26
 -1 -7 -1 5.09 1.1
 -1 -7 -1 3.59 1.22
 1 -7 1 2.53 0.82
 1 7 1 5.77 1.38
 1 7 1 9.98 1.64
 1 7 1 5.61 1.35
 -1 7 -1 5.49 1.19
 -1 7 -1 6.93 1.19
 1 7 1 6.46 1.17
 -1 7 -1 7.19 0.94
 -1 7 -1 5.82 1.57
 -1 7 -1 6.06 1.24
 -2 -7 -1 3.71 1.06
 -2 -7 -1 4.63 1.41
 2 -7 1 5.68 1.15
 -2 -7 -1 3.67 0.96
 2 -7 1 5.41 1.1
 -2 -7 -1 3.92 1.13
 2 7 1 6.75 1.35
 2 7 1 4.16 1.24
 -2 7 -1 5.31 0.67
 -2 7 -1 3.63 0.94
 2 7 1 5.16 1.33
 -2 7 -1 5.74 1.61
 -2 7 -1 4.95 1.11
 2 7 1 5.94 1.43
 -2 7 -1 4.99 1.11
 3 -7 1 7.86 1.27
 -3 -7 -1 3.85 1.32
 3 -7 1 5.06 1.16
 -3 -7 -1 4.06 1.06
 3 -7 1 7.04 1.35
 -3 -7 -1 4.79 1.12
 -3 7 -1 4.74 0.42
 3 7 1 4.75 1.25
 -3 7 -1 2.78 1.2
 3 7 1 6.45 1.5
 3 7 1 6.66 1.51
 -3 7 -1 4.34 1.01
 -3 7 -1 7.36 1.35
 -3 7 -1 4.31 0.99
 -4 -7 -1 0.23 0.53
 -4 -7 -1 0.24 0.75
 -4 -7 -1 -0.34 0.42
 4 -7 1 0.35 0.71
 4 -7 1 0.24 0.55
 4 7 1 0.14 0.53
 -4 7 -1 1.94 0.82
 -4 7 -1 0.09 0.41
 -4 7 -1 0.36 0.54
 -4 7 -1 0.38 0.84
 -5 -7 -1 3.8 1.33
 -5 -7 -1 4.02 1.14
 5 -7 1 2.93 1.12
 5 -7 1 2.51 0.82
 -5 -7 -1 2.29 1.11
 -5 7 -1 4.57 1.2
 -5 7 -1 4.44 1
 5 7 1 2.27 1.05
 -6 -7 -1 3.75 1.27
 -6 -7 -1 1.99 1.14
 6 -7 1 3.46 1.38
 -6 7 -1 4.61 0.95
 6 7 1 3.13 1.13
 -6 7 -1 2.37 1
 -6 -8 1 9.76 1.95
 -6 -8 1 7.46 1.92
 -6 -8 1 6.24 1.42
 -6 8 1 8.98 1.81
 6 8 -1 4.72 1.39
 -6 8 1 8.76 1.57
 -5 -8 1 19.88 2.63
 5 -8 -1 15.23 2.04
 -5 -8 1 18.36 2.85
 -5 -8 1 18.22 2.33
 -5 8 1 23.05 2.45
 -5 8 1 16.96 2.21
 -5 8 1 19.4 2.53
 5 8 -1 17.44 2.52
 -4 -8 1 28.08 2.45
 -4 -8 1 26.69 3.46
 -4 -8 1 28.29 2.97
 4 -8 -1 30.39 2.46
 4 -8 -1 28.19 2.55
 4 8 -1 31.75 3.35
 -4 8 1 32.09 2.36
 -4 8 1 37.48 2.8
 -4 8 1 31.85 2.68
 3 -8 -1 39.01 2.8
 -3 -8 1 38.45 2.76
 -3 -8 1 37.99 2.8
 3 -8 -1 31.03 2.59
 -3 -8 1 36.97 3.34
 -3 -8 1 37.57 2.72
 3 8 -1 42.62 3.24
 -3 8 1 49.35 3
 3 8 -1 46.35 3.28
 -3 8 1 44.63 3.1
 -3 8 1 48.96 3.29
 2 -8 -1 14.28 1.89
 2 -8 -1 15.51 0.82
 -2 -8 1 16.01 1.9
 -2 -8 1 13.93 2.5
 2 -8 -1 15.14 2.09
 -2 -8 1 16.43 1.99
 -2 -8 1 13.74 1.95
 2 8 -1 19.47 2.56
 -2 8 1 22.33 2.65
 -2 8 1 17.41 2.14
 -2 8 1 20.74 2.5
 2 8 -1 18.29 2.23
 2 8 -1 18.7 2.44
 1 -8 -1 2.22 0.87
 1 -8 -1 3.15 1.27
 -1 -8 1 1.17 0.8
 -1 -8 1 2.58 0.79
 1 -8 -1 1.03 0.77
 -1 -8 1 1.75 0.62
 1 -8 -1 1.76 0.51
 -1 8 1 3.54 1.11
 -1 8 1 1.11 0.89
 1 8 -1 1.09 0.79
 1 8 -1 2.68 1.02
 -1 8 1 0.71 0.68
 1 8 -1 3.64 0.94
 0 -8 1 2.35 0.76
 0 -8 1 3.1 0.7
 0 -8 -1 2.27 0.9
 0 -8 -1 2.21 0.69
 0 -8 -1 1.76 1.1
 0 -8 -1 3.06 1
 0 -8 -1 1.49 0.9
 0 8 -1 1.85 0.96
 0 8 1 5.29 1.35
 0 8 1 3.76 1.18
 0 8 -1 3.69 1.11
 0 8 -1 3.38 0.89
 0 8 1 3.61 0.8
 -1 -8 -1 4.74 1.18
 1 -8 1 5.8 1.11
 -1 -8 -1 5.13 1.62
 -1 -8 -1 3.47 0.9
 1 -8 1 5.05 0.7
 -1 -8 -1 2.97 1.05
 -1 8 -1 6.33 1.31
 -1 8 -1 7.1 1.47
 -1 8 -1 4.13 0.81
 1 8 1 5.55 1.41
 -1 8 -1 6.01 1.25
 1 8 1 3.17 1.1
 1 8 1 4.93 1.07
 -2 -8 -1 20.49 2.33
 -2 -8 -1 14.36 1.88
 -2 -8 -1 15.39 2.1
 -2 -8 -1 20.24 2.94
 2 -8 1 15.82 1.84
 2 8 1 19.68 2.61
 -2 8 -1 20.56 1.9
 2 8 1 20.34 2.32
 -2 8 -1 21.86 2.46
 -2 8 -1 20.77 1.21
 -2 8 -1 18.91 2.3
 -3 -8 -1 5.16 1.56
 -3 -8 -1 0.79 0.73
 -3 -8 -1 3.58 1.09
 3 -8 1 2.07 0.93
 3 8 1 4.34 1.29
 -3 8 -1 4.1 1.13
 3 8 1 3.17 1.15
 -3 8 -1 3.74 1.07
 -3 8 -1 2.55 0.91
 -4 -8 -1 2.41 1
 -4 -8 -1 2.54 1.21
 4 -8 1 1.12 0.86
 -4 -8 -1 1.46 0.85
 4 8 1 1.48 0.9
 -4 8 -1 1.37 0.74
 -4 8 -1 1.45 0.72
 -4 8 -1 0.64 0.68
 -5 -8 -1 1.57 0.83
 -5 -8 -1 2.43 1.17
 5 -8 1 1.15 0.95
 -5 -8 -1 0.53 0.96
 -5 8 -1 1.9 0.76
 5 8 1 0.18 0.77
 -5 8 -1 1.41 0.79
 -6 -8 -1 2.82 1.28
 -6 -8 -1 3.5 1.34
 -6 8 -1 4.35 1.04
 -6 8 -1 4.42 1.24
 6 8 1 2.89 1.14
 -5 -9 1 9.15 2.17
 5 -9 -1 5.93 1.38
 -5 -9 1 8.59 1.77
 5 9 -1 7.79 1.77
 -5 9 1 9.53 1.81
 -5 9 1 10.59 1.88
 -4 -9 1 4.31 1.29
 -4 -9 1 2.61 1.34
 4 -9 -1 3.55 1.17
 -4 9 1 2.65 1.09
 4 9 -1 2.92 1.2
 -4 9 1 4.17 1.2
 -4 9 1 6.06 1.52
 3 -9 -1 3.4 1.16
 3 -9 -1 3.29 1.14
 -3 -9 1 4.3 1.18
 -3 -9 1 5.69 1.36
 -3 -9 1 6.23 1.82
 -3 9 1 4.92 1.26
 -3 9 1 7.58 1.73
 3 9 -1 2.86 1.22
 3 9 -1 6.4 1.55
 -3 9 1 5.52 1.38
 -2 -9 1 38.14 2.61
 -2 -9 1 38.62 4.47
 2 -9 -1 37.07 1.5
 -2 -9 1 36.69 2.68
 2 -9 -1 42.67 2.96
 2 -9 -1 34.63 2.9
 -2 9 1 39.93 3.13
 2 9 -1 43.24 3.01
 -2 9 1 43.05 3.05
 2 9 -1 36.32 3.1
 -2 9 1 38.32 3.06
 -1 -9 1 18.02 1.9
 -1 -9 1 13.28 1.76
 1 -9 -1 19.47 2.56
 1 -9 -1 14.65 1.98
 1 -9 -1 11.96 2.52
 1 -9 -1 15.34 1.22
 -1 9 1 21.13 2.76
 1 9 -1 21.15 2.8
 -1 9 1 20.67 2.59
 1 9 -1 19 2.18
 0 -9 -1 6.41 1.38
 0 -9 -1 4.07 1.65
 0 -9 1 6.42 1.25
 0 -9 -1 6.39 1.11
 0 -9 1 6.08 0.98
 0 9 1 8.48 1.32
 0 9 -1 7.96 1.69
 0 9 1 5.86 1.59
 0 9 -1 9.24 1.78
 0 9 -1 6.41 1.17
 -1 -9 -1 3.26 0.91
 1 -9 1 2.5 0.57
 -1 -9 -1 3.08 1.43
 1 -9 1 3.14 0.92
 1 9 1 2.35 0.85
 1 9 1 3.89 1.35
 -1 9 -1 4.33 1.22
 -1 9 -1 2.66 1.1
 -1 9 -1 3.4 0.75
 -2 -9 -1 4.3 1.48
 -2 -9 -1 5.27 1.22
 2 -9 1 4.96 1.18
 -2 9 -1 6.76 1.51
 2 9 1 8.42 1.85
 -2 9 -1 7.19 1.43
 -2 9 -1 4.12 1.2
 2 9 1 7.31 1.49
 -3 -9 -1 3.66 1.16
 -3 -9 -1 5.42 1.67
 3 -9 1 4.75 1.34
 -3 9 -1 6.82 1.41
 3 9 1 7.55 1.78
 -3 9 -1 5.8 1.37
 -3 9 -1 7.56 1.5
 4 -9 1 14.04 2.13
 -4 -9 -1 14.83 2.71
 -4 -9 -1 8.97 1.82
 -4 9 -1 10.55 1.73
 -4 9 -1 12.65 1.95
 4 9 1 10.74 2.06
 -5 -9 -1 -0.02 0.89
 -5 -9 -1 -0.14 0.78
 -5 9 -1 0.54 0.69
 5 9 1 0.53 0.85
 -5 9 -1 -0.49 0.49
 -4 -10 1 0.38 1.1
 -4 -10 1 0.72 0.76
 4 -10 -1 0.49 0.75
 -4 10 1 1.59 0.95
 4 10 -1 1 0.91
 -4 10 1 2.76 1.24
 -3 -10 1 -0.03 0.59
 3 -10 -1 0.15 0.67
 -3 -10 1 0.29 0.97
 -3 10 1 -0.72 0.52
 -3 10 1 0.44 0.82
 3 10 -1 -0.06 0.73
 -3 10 1 0.82 0.84
 2 -10 -1 -0.77 0.58
 -2 -10 1 0.95 0.72
 -2 10 1 -0.38 0.63
 2 10 -1 0.66 0.77
 2 10 -1 0.18 0.73
 -2 10 1 1.89 1.09
 -1 -10 1 2.14 0.78
 -1 -10 1 2.05 0.89
 -1 10 1 2.41 1.19
 1 10 -1 2.24 0.93
 1 10 -1 3.96 1.46
 0 -10 -1 5.62 1.97
 0 -10 -1 7.69 1.19
 0 -10 1 7.56 1.41
 0 -10 1 8.01 1.17
 0 10 -1 13.02 2.22
 0 10 1 4.82 1.48
 1 -10 1 5.35 1.23
 -1 -10 -1 5.66 1.16
 -1 -10 -1 6.52 1.95
 1 10 1 6.51 1.41
 -1 10 -1 6.66 1.6
 1 10 1 7.17 1.82
 -1 10 -1 6.58 1.63
 -2 -10 -1 0.82 0.68
 -2 -10 -1 0.1 1.12
 2 -10 1 -0.51 0.51
 -2 10 -1 0.15 0.71
 -2 10 -1 0.65 0.74
 2 10 1 0.88 0.77
 -2 10 -1 0.06 0.75
 2 10 1 0.51 0.81
 -3 -10 -1 2.92 1.12
 -3 -10 -1 1.02 1.02
 -3 10 -1 2.59 1.09
 -3 10 -1 0.97 0.76
 3 10 1 2.42 1.24
 -10 0 2 1.31 0.94
 -9 0 2 1.19 1.17
 -9 0 2 1.95 0.98
 8 0 -2 15.98 2.19
 8 0 -2 16.15 1.23
 -8 0 2 16.81 2.27
 -8 0 2 15.03 1.26
 -8 0 2 16.25 1.07
 -8 0 2 20.82 3.35
 7 0 -2 93.03 3.43
 -7 0 2 92.94 5.62
 -7 0 2 88.51 4.42
 -7 0 2 86.34 3.48
 -7 0 2 89.87 3.04
 7 0 -2 97.34 4.64
 7 0 -2 81.18 5.39
 -6 0 2 146.98 5.78
 6 0 -2 138.44 6.9
 -6 0 2 151.69 4.96
 -6 0 2 145.91 4.3
 6 0 -2 138.85 5.77
 6 0 -2 144.51 4.78
 -6 0 2 143.31 6.9
 -5 0 2 28.33 1.07
 -5 0 2 27.59 2.51
 5 0 -2 28.85 1.49
 -5 0 2 30 2
 5 0 -2 28.47 2
 -5 0 2 26.72 1.5
 5 0 -2 31.08 2.67
 4 0 -2 41.44 1.77
 -4 0 2 38.48 1.79
 4 0 -2 39.06 2.17
 -4 0 2 41.28 2.21
 4 0 -2 37.64 2.7
 -4 0 2 43.19 2.81
 3 0 -2 116.89 4.14
 3 0 -2 114.68 4.72
 -3 0 2 118.17 3.79
 -3 0 2 121.48 4.13
 -3 0 2 113.65 4.65
 3 0 -2 120.72 3.77
 2 0 -2 197.91 6.28
 2 0 -2 197.81 5.68
 -2 0 2 193.99 6.2
 -2 0 2 192.42 5.84
 2 0 -2 191.68 5.86
 -2 0 2 198.15 5.7
 2 0 -2 200.52 5.26
 -1 0 2 173.69 5.11
 -1 0 2 171.38 5.13
 -1 0 2 173.74 5.02
 -1 0 2 180.49 4.91
 1 0 -2 176.98 5.01
 1 0 -2 175.59 4.91
 1 0 -2 175.46 5.14
 1 0 -2 177.79 5.13
 0 0 -2 108.88 3.53
 0 0 -2 114.84 3.54
 0 0 2 118.24 3.37
 0 0 2 119.97 3.54
 0 0 -2 115.82 3.36
 1 0 2 24.22 0.92
 -1 0 -2 24.99 1.24
 -1 0 -2 24.93 0.95
 1 0 2 25.83 1.23
 2 0 2 6.27 0.38
 -2 0 -2 7.42 1
 -2 0 -2 4.9 0.69
 2 0 2 6.34 0.75
 3 0 2 76.39 2.27
 -3 0 -2 78.18 3.46
 3 0 2 74.77 2.3
 3 0 2 74.98 2.89
 -3 0 -2 76.57 2.97
 -4 0 -2 19.98 1.38
 -4 0 -2 18.85 2.49
 4 0 2 19.83 0.85
 4 0 2 21.46 1.36
 4 0 2 20.79 0.87
 -4 0 -2 22.76 1.86
 -5 0 -2 6.59 1.06
 -5 0 -2 6.28 1.69
 5 0 2 6.3 0.44
 -5 0 -2 6.41 1.32
 5 0 2 6.04 0.48
 -6 0 -2 0.3 0.39
 6 0 2 0.16 0.2
 6 0 2 -0.02 0.15
 -6 0 -2 0.51 0.58
 -6 0 -2 0.22 0.82
 -7 0 -2 95.52 4.17
 -7 0 -2 88.06 5.97
 -7 0 -2 89.23 4.99
 7 0 2 95.14 2.79
 7 0 2 94.03 2.97
 -8 0 -2 0.14 0.72
 -8 0 -2 -0.25 1
 -8 0 -2 2.27 0.75
 -10 -1 2 6.18 1.6
 -10 1 2 5.34 1.43
 -9 -1 2 0.31 1
 -9 -1 2 0.85 0.8
 -9 1 2 0.21 0.63
 -9 1 2 0.36 0.98
 -8 -1 2 4.39 1.68
 -8 -1 2 3.72 0.7
 -8 -1 2 4.41 1.2
 -8 -1 2 2.62 0.7
 8 -1 -2 4.13 0.7
 8 -1 -2 3.97 1.15
 8 1 -2 4.81 0.86
 -8 1 2 3.78 0.56
 -8 1 2 3.28 1.42
 -8 1 2 3.44 0.68
 -8 1 2 3.38 1.02
 7 -1 -2 141.69 7.27
 7 -1 -2 134.36 4.56
 -7 -1 2 131.16 4.91
 -7 -1 2 142.16 6.07
 -7 -1 2 149.5 7.54
 -7 -1 2 137.61 4.54
 7 -1 -2 137.18 5.72
 7 1 -2 144.65 6.31
 -7 1 2 148.49 5.92
 -7 1 2 149.44 7.36
 -7 1 2 134.79 4.83
 7 1 -2 146.36 5.06
 -7 1 2 147.59 4.4
 -6 -1 2 21.43 1.93
 -6 -1 2 19.99 1.17
 -6 -1 2 20.77 2.89
 6 -1 -2 21.1 1.24
 -6 -1 2 23.5 1.52
 6 -1 -2 21.49 1.79
 6 -1 -2 21.61 2.91
 -6 1 2 21.42 2.78
 6 1 -2 25.57 1.52
 -6 1 2 21.46 1.74
 6 1 -2 21.57 0.99
 6 1 -2 21.45 2.32
 -6 1 2 20.28 1.3
 -6 1 2 21.44 0.97
 -5 -1 2 9.41 0.72
 -5 -1 2 10.78 1.15
 5 -1 -2 10.67 1.35
 -5 -1 2 7 1.54
 -5 -1 2 9.66 1.4
 5 -1 -2 9.38 0.78
 5 -1 -2 12.98 2.04
 -5 1 2 11.01 0.55
 5 1 -2 8.25 1.73
 5 1 -2 10.29 1.09
 -5 1 2 9.9 0.83
 -5 1 2 10.54 1.32
 5 1 -2 10.11 0.59
 5 1 -2 11.22 1.54
 -5 1 2 11.17 1.9
 4 -1 -2 43.61 2.88
 -4 -1 2 43.16 1.72
 -4 -1 2 47.35 2.11
 4 -1 -2 46.85 2.25
 -4 -1 2 48.87 3.05
 4 -1 -2 45.41 1.85
 -4 -1 2 44.28 2.45
 4 1 -2 47.5 1.63
 4 1 -2 47.66 2.58
 -4 1 2 46.56 1.95
 4 1 -2 44.07 2.98
 4 1 -2 51.97 2.18
 -4 1 2 52.25 3.06
 -4 1 2 48.08 2.28
 -4 1 2 47.29 1.68
 -3 -1 2 108.4 4.05
 3 -1 -2 112.3 3.49
 -3 -1 2 102.01 4.42
 -3 -1 2 112.88 3.75
 3 -1 -2 105.26 4.41
 3 -1 -2 107.83 3.7
 3 1 -2 108.37 4.53
 3 1 -2 105.03 3.66
 3 1 -2 107.65 4.07
 3 1 -2 107.92 3.34
 -3 1 2 106.58 3.18
 -3 1 2 113.83 4.46
 -3 1 2 111.36 3.5
 -3 1 2 112.17 3.7
 -2 -1 2 38.68 2.01
 2 -1 -2 42.16 1.62
 2 -1 -2 40.7 1.54
 -2 -1 2 42.29 1.91
 2 -1 -2 39.58 1.6
 2 -1 -2 40.25 2.03
 -2 -1 2 40.25 1.74
 2 1 -2 39.74 1.89
 -2 1 2 40.85 1.6
 2 1 -2 42.8 1.77
 2 1 -2 36.23 2.01
 -2 1 2 41.09 1.47
 -2 1 2 41.63 1.61
 -2 1 2 42.44 2.04
 1 -1 -2 164.16 4.99
 -1 -1 2 172.78 5.09
 -1 -1 2 171.82 4.92
 1 -1 -2 169.34 5.03
 -1 -1 2 176.04 5.16
 1 -1 -2 177.78 5.28
 1 1 -2 169.63 5.17
 -1 1 2 176.79 5.04
 1 1 -2 163.31 4.99
 -1 1 2 177.82 5.02
 -1 1 2 174.65 5.3
 1 1 -2 175.22 5.1
 0 -1 -2 6.47 0.56
 0 -1 2 6.91 0.55
 0 -1 -2 7.66 0.84
 0 -1 -2 7.86 0.78
 0 1 -2 7.75 0.56
 0 1 2 8.08 0.58
 0 1 2 7.86 0.66
 -1 -1 -2 43.62 1.68
 -1 -1 -2 42.25 1.86
 1 -1 2 41.45 1.44
 1 1 2 40.78 1.6
 -1 1 -2 41.94 1.36
 1 1 2 43.48 1.82
 -2 -1 -2 4.9 0.6
 -2 -1 -2 7.14 1.09
 -2 -1 -2 5.15 0.79
 2 -1 2 5.33 0.33
 -2 1 -2 4.74 0.69
 2 1 2 5.35 0.59
 2 1 2 4.6 0.57
 2 1 2 5.07 0.71
 -2 1 -2 5.74 1.05
 -3 -1 -2 7.98 1.01
 -3 -1 -2 11.7 1.51
 -3 1 -2 8.28 0.96
 3 1 2 8.53 0.69
 3 1 2 9.29 1
 -3 1 -2 8.09 1.14
 -3 1 -2 7.97 1.4
 -4 -1 -2 4.18 0.77
 -4 -1 -2 4.43 1.05
 -4 1 -2 5.01 0.79
 4 1 2 2.56 0.46
 4 1 2 5.77 0.83
 -4 1 -2 5 1.33
 -4 1 -2 5.25 1.07
 4 1 2 4.07 0.59
 -5 -1 -2 35.2 2.62
 -5 -1 -2 28.26 3.5
 -5 -1 -2 28.73 1.9
 -5 1 -2 31.97 2.89
 5 1 2 27.87 1.4
 -5 1 -2 28.81 2.24
 -5 1 -2 30.17 1.83
 5 1 2 29.11 1.78
 5 1 2 31.04 1.52
 -6 -1 -2 51.5 2.82
 -6 -1 -2 59 3.7
 -6 -1 -2 49.3 4.19
 6 1 2 60.57 2.82
 -6 1 -2 59.12 3.58
 6 1 2 54.18 2.32
 -6 1 -2 55.63 4.26
 6 1 2 56.77 2.24
 -6 1 -2 61.17 2.91
 -7 -1 -2 12.7 2.15
 -7 -1 -2 18.15 3.04
 -7 -1 -2 15.62 1.83
 7 1 2 21.2 1.3
 7 1 2 17.4 1.09
 -7 1 -2 20.49 2.55
 -7 1 -2 20.12 3.21
 -7 1 -2 19.27 1.65
 -8 -1 -2 0.45 0.59
 -8 -1 -2 1.83 1.42
 -8 -1 -2 2.14 1.09
 -8 1 -2 2.58 1.11
 -8 1 -2 1.82 1.42
 8 1 2 1.63 0.51
 -8 1 -2 3.3 0.93
 -9 -2 2 0.97 1.13
 9 -2 -2 0.64 0.69
 -9 -2 2 -0.09 0.7
 -9 2 2 0.92 1.14
 -9 2 2 0.97 0.73
 -8 -2 2 8.08 1.23
 -8 -2 2 8.72 1.16
 8 -2 -2 8.84 1
 -8 -2 2 9.95 1.85
 -8 -2 2 7.83 2.14
 8 -2 -2 7.98 1.45
 -8 2 2 9.51 0.8
 -8 2 2 11.1 2.4
 8 2 -2 8.15 0.86
 -8 2 2 9.29 1.56
 -8 2 2 10.22 1.11
 8 2 -2 8.69 1.26
 7 -2 -2 9.39 1
 7 -2 -2 9.48 1.41
 -7 -2 2 12.71 2.63
 7 -2 -2 9.74 2.2
 -7 -2 2 11.92 1.9
 -7 -2 2 11.99 1.45
 -7 -2 2 13.04 1.34
 -7 2 2 10.93 0.79
 -7 2 2 11.87 2.31
 -7 2 2 11.51 0.98
 7 2 -2 12.09 0.88
 7 2 -2 10.02 1.8
 7 2 -2 13.37 1.46
 -7 2 2 11.57 1.59
 -6 -2 2 30.24 1.71
 -6 -2 2 27.18 3.4
 6 -2 -2 29.59 1.54
 -6 -2 2 29.24 1.85
 6 -2 -2 31.1 3.48
 6 -2 -2 30.6 2.01
 -6 -2 2 24.86 2.19
 6 2 -2 31.17 1.89
 6 2 -2 35.19 2.64
 -6 2 2 28.93 1.71
 -6 2 2 30.94 1.59
 6 2 -2 31 1.47
 -6 2 2 32.74 2.9
 -6 2 2 31.34 2.03
 5 -2 -2 15.76 1.29
 -5 -2 2 15.51 1.87
 -5 -2 2 19.85 2.61
 5 -2 -2 18.15 1.12
 -5 -2 2 18.19 1.28
 5 -2 -2 21.65 2.7
 -5 -2 2 16.65 1.33
 5 2 -2 17.22 1.07
 -5 2 2 17.36 1.21
 -5 2 2 18.57 2.34
 -5 2 2 18.86 1.13
 5 2 -2 16.33 1.97
 -5 2 2 19.38 1.39
 5 2 -2 18.65 1.38
 -4 -2 2 8.46 1.01
 4 -2 -2 10.28 1.06
 4 -2 -2 9.04 1.54
 -4 -2 2 11.01 1.77
 4 -2 -2 9.53 0.93
 -4 -2 2 8.49 1.27
 -4 -2 2 8.9 1.08
 4 2 -2 7.85 1.25
 -4 2 2 9.51 0.84
 4 2 -2 8.46 1.08
 -4 2 2 10.36 1.65
 4 2 -2 8.81 0.79
 -4 2 2 9.6 0.83
 -4 2 2 8.81 0.74
 -3 -2 2 272.29 8.2
 3 -2 -2 271.93 7.74
 -3 -2 2 266.52 8.97
 3 -2 -2 272.27 7.85
 3 -2 -2 273.98 8.05
 -3 -2 2 269.69 8.17
 3 -2 -2 271.1 8.84
 3 2 -2 280.76 8.49
 3 2 -2 279.73 8.61
 -3 2 2 302.75 9.29
 -3 2 2 288.26 8.22
 3 2 -2 291.61 9.15
 -3 2 2 289.45 8.09
 -3 2 2 287 8.36
 2 -2 -2 261.26 7.6
 -2 -2 2 254.72 8.06
 2 -2 -2 256.81 7.23
 2 -2 -2 270.25 8.13
 2 -2 -2 263.52 7.8
 -2 -2 2 267.1 7.98
 -2 -2 2 261.57 7.81
 2 2 -2 250.46 8.05
 -2 2 2 270.55 7.84
 2 2 -2 273.65 8.24
 -2 2 2 263.21 7.67
 -2 2 2 271.4 8.24
 2 2 -2 276.57 8
 1 -2 -2 164.94 4.98
 -1 -2 2 154.59 4.71
 -1 -2 2 162.59 4.98
 1 -2 -2 147.69 5.07
 1 -2 -2 167.12 5.22
 -1 -2 2 160.26 5.02
 1 2 -2 159.03 5.14
 -1 2 2 162.24 5.04
 -1 2 2 168.51 5.39
 1 2 -2 169.86 5.17
 -1 2 2 165.13 5.22
 0 -2 2 87.28 3
 0 -2 -2 85.01 3.11
 0 -2 -2 82.44 3.23
 0 -2 -2 96.65 3.5
 0 2 2 81.96 3.41
 0 2 2 93.22 3.34
 0 2 -2 91.95 3.05
 0 2 2 96.1 3.2
 0 2 -2 90.49 3.06
 -1 -2 -2 41.94 2.07
 1 -2 2 41.88 1.86
 1 -2 2 43.72 1.72
 -1 -2 -2 43.7 1.97
 -1 -2 -2 44.95 2.18
 1 2 2 46.96 2.16
 -1 2 -2 46.57 1.73
 -1 2 -2 47.69 1.93
 1 2 2 43.8 1.96
 1 2 2 45.65 2.02
 2 -2 2 36.33 1.41
 -2 -2 -2 35.95 1.77
 -2 -2 -2 34.31 2.11
 -2 -2 -2 33.68 1.9
 2 2 2 39.26 1.96
 -2 2 -2 34.52 2.07
 2 2 2 37.85 1.81
 -2 2 -2 37.93 1.38
 2 2 2 38.66 1.81
 -2 2 -2 37.38 1.3
 -3 -2 -2 77.43 3.67
 3 -2 2 73.69 2.32
 -3 -2 -2 72.71 3.22
 -3 2 -2 76.33 3.22
 3 2 2 80.93 3.2
 3 2 2 73.92 3.56
 3 2 2 74.06 2.97
 3 2 2 79.68 3.01
 -3 2 -2 75.08 3.75
 -4 -2 -2 4.76 0.94
 -4 -2 -2 4.01 1.08
 4 2 2 2.44 0.58
 -4 2 -2 2.83 0.76
 4 2 2 3.53 0.67
 -4 2 -2 2.27 0.93
 -4 2 -2 3.11 0.66
 4 2 2 3.05 0.67
 4 2 2 3.2 0.87
 -5 -2 -2 2.07 0.86
 -5 -2 -2 1.17 0.54
 5 2 2 0.96 0.46
 5 2 2 0.78 0.41
 -5 2 -2 1.7 0.99
 -5 2 -2 2.18 0.82
 5 2 2 1.14 0.7
 -5 2 -2 1.46 0.5
 5 2 2 1.2 0.44
 -6 -2 -2 31.54 2.74
 -6 -2 -2 28.65 3.85
 -6 -2 -2 26.14 2.05
 6 2 2 31.93 1.76
 -6 2 -2 30.43 2.44
 -6 2 -2 27.42 3.42
 -6 2 -2 31.75 2
 6 2 2 34.43 2.06
 6 2 2 30.35 1.83
 -7 -2 -2 8.64 2.28
 -7 -2 -2 8.42 1.43
 -7 -2 -2 7.43 1.76
 7 2 2 9.39 1.18
 -7 2 -2 11.78 1.46
 -7 2 -2 8.31 2.09
 -7 2 -2 11.9 1.96
 7 2 2 9.19 1.3
 -8 -2 -2 1.91 0.83
 -8 -2 -2 -0.41 0.88
 -8 -2 -2 1.36 1.01
 -8 2 -2 1.55 0.64
 -8 2 -2 3.09 1.63
 -8 2 -2 1.05 0.76
 8 2 2 -0.03 0.48
 8 2 2 2.48 0.73
 9 -3 -2 1.31 0.69
 -9 -3 2 -0.96 0.9
 -9 -3 2 2.08 1.04
 -9 3 2 0.63 1.08
 -9 3 2 1.02 0.67
 8 -3 -2 3.14 0.67
 8 -3 -2 2.38 0.84
 -8 -3 2 3.64 1.66
 -8 -3 2 3.39 0.93
 -8 -3 2 3.54 0.92
 -8 -3 2 2.77 1.13
 -8 3 2 0.05 0.9
 -8 3 2 4.37 1.03
 -8 3 2 2.66 0.8
 8 3 -2 2.06 0.55
 8 3 -2 4.1 0.91
 -8 3 2 3.68 0.6
 -8 3 2 4.05 0.7
 -7 -3 2 4.24 1.3
 -7 -3 2 7.06 1.99
 7 -3 -2 6.25 1.06
 -7 -3 2 7.75 1.26
 7 -3 -2 6.58 0.92
 -7 -3 2 6.44 1.1
 7 -3 -2 4.02 1.5
 -7 3 2 6.07 1.7
 -7 3 2 5.02 0.76
 7 3 -2 5.14 0.79
 -7 3 2 5.44 1.01
 7 3 -2 7.16 1.21
 -7 3 2 5.62 1.07
 -6 -3 2 40.98 2.84
 -6 -3 2 35.94 2.21
 6 -3 -2 33.61 1.79
 -6 -3 2 27.49 3.52
 6 -3 -2 29.55 3.43
 -6 -3 2 33.31 2.09
 6 -3 -2 34.59 1.99
 6 3 -2 37.33 2.29
 -6 3 2 40.6 3.19
 6 3 -2 39.75 2
 -6 3 2 39.57 2.25
 -6 3 2 38.72 2.12
 -6 3 2 35.51 1.79
 6 3 -2 37.67 2.89
 -5 -3 2 14.61 2.33
 -5 -3 2 13.21 1.53
 -5 -3 2 11.13 1.39
 -5 -3 2 13.15 1.86
 5 -3 -2 10.92 0.97
 5 -3 -2 11.02 1.91
 5 -3 -2 13.15 1.04
 5 3 -2 10.15 1.16
 -5 3 2 13.93 1.25
 -5 3 2 13.38 1.03
 -5 3 2 13.59 0.97
 5 3 -2 12.49 1.48
 5 3 -2 14.31 1.93
 -5 3 2 9.19 1.7
 4 -3 -2 80.13 4.11
 4 -3 -2 85.52 2.93
 -4 -3 2 81.76 3.87
 4 -3 -2 82.41 3.16
 -4 -3 2 78.48 3.46
 -4 -3 2 88.39 4.48
 -4 -3 2 82.26 3.56
 -4 3 2 91.26 2.97
 -4 3 2 86.83 4.18
 4 3 -2 85.86 4.09
 -4 3 2 83.3 3.11
 4 3 -2 88.38 3.56
 -4 3 2 88.07 3.58
 4 3 -2 85.91 3.64
 -3 -3 2 45.55 2.3
 3 -3 -2 43.88 2.06
 3 -3 -2 44.15 1.63
 -3 -3 2 44.11 2.46
 3 -3 -2 44.99 2.57
 -3 -3 2 41.83 2.39
 3 -3 -2 42.01 2.31
 -3 3 2 42.62 1.95
 -3 3 2 48.23 2.65
 3 3 -2 45.8 2.32
 3 3 -2 47.25 2.58
 3 3 -2 42.05 2.3
 -3 3 2 43.16 2.25
 2 -3 -2 3.28 0.64
 2 -3 -2 3.84 0.81
 2 -3 -2 4.51 0.44
 -2 -3 2 5.2 0.88
 2 -3 -2 3.26 0.76
 -2 -3 2 4.74 0.82
 2 3 -2 3.78 0.75
 -2 3 2 1.91 0.62
 -2 3 2 4.29 0.84
 2 3 -2 3.9 0.86
 -2 3 2 4.43 0.7
 2 3 -2 3.41 0.73
 1 -3 -2 128.68 4.44
 1 -3 -2 125.73 4.68
 1 -3 -2 125.37 4.54
 -1 -3 2 130.9 4.46
 -1 -3 2 123.32 4.25
 -1 3 2 131.74 4.74
 1 3 -2 131.59 4.47
 1 3 -2 134.96 4.56
 -1 3 2 128.07 4.72
 -1 3 2 127.33 4.42
 0 -3 2 156.88 5.12
 0 -3 -2 150.15 5.07
 0 -3 2 160.71 4.47
 0 -3 -2 153.88 5.26
 0 -3 -2 156.01 5.53
 0 -3 2 161.69 4.85
 0 -3 -2 159.41 5.49
 0 3 2 173.02 5.76
 0 3 2 158.9 5.78
 0 3 -2 167.69 5.17
 0 3 -2 164.45 5.34
 0 3 2 165.2 5.47
 0 3 2 170.53 5.59
 -1 -3 -2 12.28 1.43
 -1 -3 -2 13 1.14
 -1 -3 -2 15.01 1.26
 1 -3 2 13.89 0.99
 1 -3 2 13.1 0.99
 -1 3 -2 13.98 1.07
 -1 3 -2 14.11 0.87
 1 3 2 15.49 1.23
 -1 3 -2 14.07 0.91
 1 3 2 13.23 1.13
 1 3 2 15.69 1.3
 -1 3 -2 12.91 0.95
 -2 -3 -2 16.74 1.49
 2 -3 2 16.72 1.4
 2 -3 2 18.2 1.09
 -2 -3 -2 17.53 1.48
 -2 -3 -2 17.18 1.34
 2 3 2 15.84 1.43
 -2 3 -2 17.91 1.03
 2 3 2 19.88 1.49
 2 3 2 18.79 1.38
 2 3 2 19.28 1.37
 -2 3 -2 18.75 1.37
 -2 3 -2 18.04 1.08
 3 -3 2 8.04 1.36
 -3 -3 -2 7.51 1.32
 -3 -3 -2 7.66 1.2
 3 -3 2 7.58 0.66
 -3 3 -2 7.04 0.51
 -3 3 -2 7.05 0.53
 -3 3 -2 8.22 1.34
 3 3 2 7.11 1.21
 3 3 2 7.95 1.13
 3 3 2 6.65 1.01
 3 3 2 8.57 1.14
 4 -3 2 14.42 2.12
 -4 -3 -2 11.94 1.58
 -4 -3 -2 15.45 2.04
 4 3 2 17.23 2.12
 -4 3 -2 16.4 1.4
 4 3 2 16.36 1.36
 4 3 2 14.18 1.49
 4 3 2 17.6 1.43
 -4 3 -2 14.99 2.01
 -5 -3 -2 16.52 1.93
 -5 -3 -2 10.52 1.84
 5 3 2 11.67 1.82
 -5 3 -2 18.13 1.44
 5 3 2 12.55 1.47
 5 3 2 16.14 1.45
 -5 3 -2 16.13 2.31
 5 3 2 15.57 1.36
 -5 3 -2 18.92 2.04
 -6 -3 -2 0.43 0.67
 -6 -3 -2 1.29 0.71
 6 3 2 2.91 0.74
 -6 3 -2 1.94 1.01
 -6 3 -2 3.98 0.86
 -6 3 -2 3.51 1.03
 6 3 2 1.97 0.68
 6 3 2 1.95 0.63
 -7 -3 -2 2.83 0.95
 -7 -3 -2 1.47 0.93
 -7 -3 -2 3.62 1.68
 -7 3 -2 3.91 0.91
 -7 3 -2 2.04 0.82
 7 3 2 4.3 0.98
 7 3 2 2.81 0.94
 -7 3 -2 4.26 1.66
 -8 -3 -2 12.01 2.31
 -8 -3 -2 17.53 2.31
 -8 -3 -2 10.95 2.8
 -8 3 -2 15.15 1.76
 -8 3 -2 17.37 3.04
 -8 3 -2 9.33 1.74
 -9 -4 2 2.12 1.12
 -9 -4 2 2.71 1.74
 -9 4 2 2.29 0.67
 -9 4 2 5.48 1.96
 -9 4 2 5.44 1.13
 -8 -4 2 15 3.07
 8 -4 -2 14.11 1.67
 8 -4 -2 13.23 1.51
 -8 -4 2 14.09 2.37
 -8 -4 2 10.6 1.66
 -8 -4 2 14.59 1.89
 8 4 -2 14.73 1.82
 -8 4 2 13.4 1.8
 -8 4 2 11.87 1.37
 -8 4 2 15.85 1.74
 8 4 -2 13.17 1.42
 -8 4 2 16.52 2.79
 -7 -4 2 2.7 0.93
 7 -4 -2 2.86 0.67
 -7 -4 2 3.36 0.95
 -7 -4 2 4.99 1.65
 7 -4 -2 2.92 0.67
 -7 -4 2 4.04 1.24
 7 4 -2 4.42 1.04
 7 4 -2 4.13 0.85
 -7 4 2 1.72 1.11
 -7 4 2 3.14 0.62
 -7 4 2 2.71 0.69
 -7 4 2 3.81 1.06
 6 -4 -2 1.51 0.53
 -6 -4 2 1.44 0.73
 -6 -4 2 1.89 0.81
 6 -4 -2 1.62 0.95
 -6 -4 2 4.14 0.98
 -6 -4 2 2.14 1.24
 6 -4 -2 2.54 0.6
 -6 4 2 4.25 0.7
 6 4 -2 1.81 0.88
 6 4 -2 3.95 0.97
 -6 4 2 1.81 1
 -6 4 2 2.75 0.86
 6 4 -2 2.18 0.65
 -6 4 2 2.91 0.61
 -5 -4 2 6.49 1.68
 5 -4 -2 6.75 0.74
 5 -4 -2 7.87 1.07
 -5 -4 2 5.81 1.29
 -5 -4 2 8.15 1.36
 -5 -4 2 6.09 1.1
 5 -4 -2 4.83 1.29
 -5 4 2 7.55 0.76
 5 4 -2 11.19 1.47
 -5 4 2 5.85 0.82
 -5 4 2 6.02 1.4
 -5 4 2 6.37 1.16
 5 4 -2 5.8 1.34
 5 4 -2 6.06 1.04
 4 -4 -2 32.6 1.86
 -4 -4 2 29.64 2.03
 -4 -4 2 29.26 2.19
 4 -4 -2 31.23 2.4
 -4 -4 2 28.77 2.21
 4 -4 -2 32.77 1.27
 4 4 -2 36.29 2.55
 4 4 -2 35.8 2.25
 -4 4 2 37.7 2.58
 -4 4 2 33.76 2.26
 -4 4 2 36.04 1.85
 4 4 -2 32.01 2.18
 3 -4 -2 17.21 1.95
 -3 -4 2 17.54 1.99
 3 -4 -2 13.97 1.22
 3 -4 -2 16.36 0.71
 3 -4 -2 14.46 1.73
 -3 -4 2 16.34 1.43
 -3 -4 2 14.36 1.66
 -3 4 2 15.39 1.7
 3 4 -2 14.26 1.72
 -3 4 2 15.87 1.79
 3 4 -2 17.17 1.76
 -3 4 2 14.56 1.15
 3 4 -2 16.22 1.78
 2 -4 -2 34.22 2.14
 2 -4 -2 41.65 2.2
 -2 -4 2 37.3 2.16
 2 -4 -2 36.98 1.43
 2 -4 -2 39.37 2.47
 -2 -4 2 36.24 2.09
 2 4 -2 40.01 2.58
 -2 4 2 36.59 2.02
 -2 4 2 40.14 2.35
 -2 4 2 40.33 2.4
 2 4 -2 40.11 2.29
 2 4 -2 42.49 2.32
 -2 4 2 38.9 2.2
 -1 -4 2 47.38 2.19
 1 -4 -2 45.56 1.93
 1 -4 -2 43.4 2.61
 -1 -4 2 45.12 2.35
 1 -4 -2 45.11 2.41
 -1 -4 2 43.51 1.91
 1 -4 -2 43.66 2.34
 -1 4 2 44.28 2.55
 -1 4 2 43.79 2.49
 1 4 -2 43.11 2.76
 -1 4 2 47.07 2.45
 -1 4 2 41.08 2.23
 1 4 -2 47.1 2.29
 1 4 -2 48.51 2.43
 0 -4 -2 64.47 2.82
 0 -4 -2 71.21 3.47
 0 -4 2 68.89 3.01
 0 -4 2 66.31 2.58
 0 -4 -2 67.08 3.13
 0 -4 -2 72.13 3.28
 0 -4 2 71.98 2.44
 0 4 -2 72.35 3.29
 0 4 2 81.05 3.42
 0 4 2 72.42 3.49
 0 4 2 75.43 3.27
 0 4 -2 73.93 3.14
 0 4 -2 71.34 2.87
 1 -4 2 71.56 2.96
 -1 -4 -2 70.43 3.24
 -1 -4 -2 70.53 3.2
 -1 -4 -2 65.72 3.32
 -1 -4 -2 69.4 3.45
 1 -4 2 69.3 2.7
 1 4 2 75.88 3.36
 -1 4 -2 74.49 3.2
 1 4 2 75.08 3.4
 -1 4 -2 74.82 2.76
 1 4 2 76.16 3.34
 1 4 2 78.25 3.6
 -1 4 -2 77.58 2.74
 -1 4 -2 75.18 3.09
 -2 -4 -2 81.3 3.66
 2 -4 2 84.76 3.25
 -2 -4 -2 79.41 3.84
 -2 -4 -2 80.81 3.8
 2 -4 2 80.23 3.47
 -2 4 -2 89.3 3.1
 2 4 2 87.7 3.94
 2 4 2 88.5 3.85
 -2 4 -2 89.15 3.39
 2 4 2 82.81 3.88
 2 4 2 95.76 3.88
 -2 4 -2 90.02 3.33
 -2 4 -2 82.29 3.34
 -3 -4 -2 2.07 0.82
 3 -4 2 0.93 0.61
 -3 -4 -2 0.22 0.52
 3 -4 2 0.98 0.4
 3 4 2 0.67 0.49
 -3 4 -2 0.34 0.5
 3 4 2 1.17 0.6
 3 4 2 2.57 0.88
 3 4 2 0.46 0.52
 -3 4 -2 0.63 0.29
 -3 4 -2 1.59 0.42
 -4 -4 -2 4.68 1.16
 4 -4 2 2.33 1.02
 -4 -4 -2 4.75 1.28
 4 4 2 3.65 1.02
 -4 4 -2 4.49 0.5
 -4 4 -2 4.79 0.57
 4 4 2 4.54 0.97
 4 4 2 5.53 1.06
 -4 4 -2 3.72 0.8
 -4 4 -2 2.21 0.93
 4 4 2 5.14 1.03
 -5 -4 -2 2.77 1.03
 -5 -4 -2 5.2 1.19
 5 -4 2 4.66 1.4
 -5 4 -2 4.42 1.23
 -5 4 -2 3.66 0.93
 5 4 2 3.42 0.85
 5 4 2 3.34 0.89
 5 4 2 3.75 0.9
 -6 -4 -2 3.53 1.09
 -6 -4 -2 2.57 1.09
 6 4 2 5.49 1.14
 -6 4 -2 5.17 1.43
 -6 4 -2 6.24 1.24
 6 4 2 4.09 0.95
 -7 -4 -2 12.46 2.27
 -7 -4 -2 13.32 2.06
 -7 4 -2 15.21 1.81
 -7 4 -2 13.71 1.93
 -7 4 -2 15.04 2.54
 -8 -4 -2 2.81 1.17
 -8 4 -2 3.75 1.2
 -8 4 -2 3.44 1.37
 -8 4 -2 3.47 0.98
 -9 -5 2 7.67 2.85
 -9 5 2 5.95 1.88
 -9 5 2 8.7 1.19
 -8 -5 2 1.05 1.13
 -8 -5 2 2.87 1.16
 -8 -5 2 1.66 0.85
 -8 5 2 2.31 1.03
 8 5 -2 2.1 0.81
 -8 5 2 1.76 0.89
 -8 5 2 1.48 1.11
 8 5 -2 3.5 0.9
 -8 5 2 1.99 0.73
 -7 -5 2 9.98 1.68
 7 -5 -2 11.36 1.39
 -7 -5 2 4.99 1.82
 -7 -5 2 11.95 1.7
 -7 -5 2 10.3 1.91
 -7 5 2 10.74 1.44
 -7 5 2 11.42 2.18
 -7 5 2 13.38 1.33
 -7 5 2 10.71 1.69
 7 5 -2 12.06 1.56
 -7 5 2 13.32 1.06
 7 5 -2 13.19 1.84
 -6 -5 2 6.83 1.3
 6 -5 -2 9.23 1.96
 -6 -5 2 9.13 1.7
 -6 -5 2 12.07 1.85
 6 -5 -2 11.08 1.4
 -6 -5 2 9.96 2.25
 6 5 -2 10.3 1.59
 -6 5 2 9.38 1.35
 -6 5 2 9.18 1.76
 -6 5 2 11.94 0.79
 6 5 -2 8.59 1.39
 -6 5 2 9.99 1.14
 -6 5 2 10.04 1.64
 -5 -5 2 26.77 2.35
 -5 -5 2 28.39 2.35
 -5 -5 2 27 2.1
 5 -5 -2 24.25 2.83
 5 -5 -2 26.35 1.83
 5 5 -2 28.03 2.22
 -5 5 2 27.87 2.01
 5 5 -2 33.23 2.72
 -5 5 2 30.16 1.77
 -5 5 2 35.45 2.71
 5 5 -2 34.12 2.38
 -5 5 2 31.24 2.38
 4 -5 -2 56.29 3.4
 -4 -5 2 54.84 3.38
 -4 -5 2 57.76 3.14
 4 -5 -2 57.79 2.9
 -4 -5 2 57.4 3.31
 -4 5 2 55.14 3.28
 4 5 -2 57.46 3.47
 4 5 -2 57.2 3.31
 -4 5 2 68.27 2.86
 -4 5 2 58.45 3.02
 -4 5 2 61.37 3.46
 4 5 -2 57.65 3.2
 -3 -5 2 8.36 1.34
 3 -5 -2 10.85 1.64
 -3 -5 2 8.66 1.38
 3 -5 -2 9.81 1.35
 -3 -5 2 9.5 1.66
 3 -5 -2 5.44 1.24
 -3 5 2 11.06 1.59
 3 5 -2 10.12 1.58
 3 5 -2 8.18 1.44
 -3 5 2 7.8 1.22
 3 5 -2 9.13 1.43
 -3 5 2 8.86 1.18
 -3 5 2 10.84 1.67
 2 -5 -2 1.56 0.63
 -2 -5 2 2.61 0.73
 2 -5 -2 1.97 0.38
 2 -5 -2 0.72 0.6
 -2 -5 2 1.94 0.66
 2 -5 -2 2 0.67
 2 5 -2 0.42 0.47
 -2 5 2 4.35 1.04
 2 5 -2 1.54 0.77
 2 5 -2 2.79 0.79
 -2 5 2 0.78 0.5
 -2 5 2 2.33 0.69
 -2 5 2 2.27 0.8
 -1 -5 2 34.24 2.13
 1 -5 -2 29.75 2.07
 1 -5 -2 33.89 2.47
 -1 -5 2 30.13 1.79
 1 -5 -2 31.28 1.62
 -1 -5 2 31.4 1.69
 1 -5 -2 30.59 2.09
 1 5 -2 32.6 2.01
 1 5 -2 32.74 2.59
 1 5 -2 38.9 2.31
 -1 5 2 35.57 2.36
 1 5 -2 32.81 2.34
 -1 5 2 32.01 2.08
 -1 5 2 35.27 2.44
 -1 5 2 34.64 2.26
 0 -5 -2 76.22 3.64
 0 -5 -2 73.28 3.91
 0 -5 2 80.29 2.91
 0 -5 2 77.43 2.94
 0 -5 -2 75.09 3.22
 0 -5 -2 77.5 3.66
 0 -5 2 80.78 3.51
 0 5 2 84.09 4.07
 0 5 2 85.73 3.79
 0 5 -2 88.84 3.73
 0 5 -2 85.64 3.84
 0 5 2 84.04 3.85
 0 5 -2 69.18 4.16
 0 5 -2 80.84 3.28
 -1 -5 -2 39.01 2.35
 1 -5 2 38.58 2.25
 -1 -5 -2 42.66 2.64
 -1 -5 -2 42.25 2.56
 -1 -5 -2 41.86 2.81
 1 -5 2 40.53 1.99
 -1 5 -2 42.66 2.37
 -1 5 -2 44.84 2.06
 1 5 2 42.77 2.44
 1 5 2 48.78 2.91
 1 5 2 44.22 2.6
 -1 5 -2 46.21 2.05
 1 5 2 40.76 2.61
 -1 5 -2 48.14 2.57
 2 -5 2 6.34 0.98
 -2 -5 -2 6.96 1.12
 -2 -5 -2 5.44 1.14
 2 -5 2 5.94 1.05
 -2 -5 -2 4.85 1.17
 -2 -5 -2 6.02 1.2
 2 5 2 5.35 1.11
 -2 5 -2 7.84 0.85
 -2 5 -2 6.84 1.03
 2 5 2 5.84 1.15
 -2 5 -2 8.08 1.14
 2 5 2 6.78 1.27
 -2 5 -2 8.95 1.06
 2 5 2 7.86 1.4
 -3 -5 -2 1.72 0.61
 3 -5 2 2.28 0.61
 -3 -5 -2 3.94 1.1
 -3 -5 -2 1.08 0.71
 3 -5 2 1.8 0.78
 -3 5 -2 2.3 0.56
 -3 5 -2 2.44 0.5
 3 5 2 1.35 0.68
 -3 5 -2 1.71 0.68
 3 5 2 2.53 0.82
 3 5 2 1.22 0.73
 -3 5 -2 2.47 0.63
 3 5 2 3.11 0.99
 -4 -5 -2 4.57 1.27
 4 -5 2 4.52 0.83
 -4 -5 -2 3.28 1.09
 4 -5 2 2.62 1.05
 -4 -5 -2 2.21 0.72
 4 5 2 1.7 0.83
 4 5 2 2.12 0.83
 4 5 2 1.68 0.71
 4 5 2 1.96 0.7
 -4 5 -2 3.27 0.71
 -4 5 -2 2.58 0.57
 -4 5 -2 2.54 0.87
 -4 5 -2 2.53 0.49
 5 -5 2 0.51 0.78
 -5 -5 -2 -0.1 0.59
 -5 -5 -2 2.46 1.02
 -5 5 -2 0.9 0.79
 5 5 2 1.42 0.7
 -5 5 -2 1.72 0.35
 -5 5 -2 1.3 0.61
 -5 5 -2 2.38 0.47
 5 5 2 2.51 0.94
 -6 -5 -2 2.29 1.16
 6 -5 2 1.7 1.09
 -6 -5 -2 0.47 0.75
 -6 5 -2 0.94 0.81
 -6 5 -2 2.48 0.81
 6 5 2 1.19 0.72
 -7 -5 -2 -0.12 0.68
 -7 -5 -2 0.81 0.84
 -7 5 -2 1.06 0.69
 -7 5 -2 -0.04 0.42
 -7 5 -2 1.08 0.95
 -8 -6 2 2.45 1.09
 -8 -6 2 5.57 1.9
 -8 -6 2 1.61 0.94
 -8 6 2 3.09 1.38
 8 6 -2 3.07 0.97
 -8 6 2 4.33 1.02
 8 6 -2 3.79 1.16
 -7 -6 2 -0.24 0.79
 7 -6 -2 0.28 0.5
 -7 -6 2 1.15 0.7
 -7 -6 2 2.54 1.04
 -7 -6 2 2.02 0.92
 -7 6 2 2.39 0.86
 7 6 -2 1.91 0.91
 -7 6 2 3.41 1.32
 7 6 -2 1.9 0.78
 -7 6 2 1.62 0.88
 -6 -6 2 9.46 1.62
 -6 -6 2 13.42 2.15
 -6 -6 2 16.15 2.37
 6 -6 -2 10.62 1.5
 -6 6 2 14.86 2.34
 6 6 -2 14.74 2.01
 6 6 -2 11.3 1.71
 -6 6 2 10.85 1.63
 -6 6 2 14.31 1.24
 -6 6 2 13.35 2
 -5 -6 2 18.25 2.37
 5 -6 -2 17.63 2.44
 -5 -6 2 16.85 2.09
 5 -6 -2 19.63 1.7
 -5 -6 2 20.52 2.59
 5 6 -2 24.74 2.82
 -5 6 2 23.99 1.66
 5 6 -2 21.82 2.41
 -5 6 2 25.75 2.35
 -5 6 2 20.41 2.57
 5 6 -2 16.5 2.11
 -5 6 2 21.28 1.84
 -4 -6 2 57.12 3.41
 4 -6 -2 59.87 3.56
 -4 -6 2 51.54 3.14
 -4 -6 2 51.07 3.51
 4 -6 -2 57.93 3.11
 -4 6 2 62.51 3.38
 4 6 -2 67.24 3.92
 4 6 -2 62.66 3.76
 -4 6 2 59.93 3.72
 -4 6 2 66.33 3.77
 -4 6 2 68.28 3.15
 4 6 -2 68.59 3.71
 3 -6 -2 52.85 3.52
 -3 -6 2 57.9 3.17
 -3 -6 2 48 3.42
 3 -6 -2 56.96 3.06
 -3 -6 2 51.24 3.03
 3 -6 -2 47.62 3.02
 -3 6 2 58.03 3.33
 3 6 -2 46.53 3.05
 -3 6 2 56.43 3.49
 3 6 -2 56.06 3.53
 3 6 -2 52.97 3.27
 -3 6 2 53.43 3.08
 -3 6 2 63.35 3.04
 -2 -6 2 17.59 1.49
 2 -6 -2 21.92 1.86
 -2 -6 2 17.63 2
 2 -6 -2 19.8 1.07
 2 -6 -2 22.73 1.87
 -2 -6 2 24.9 1.83
 2 -6 -2 23.97 2.79
 2 6 -2 23.72 2.44
 2 6 -2 25.82 2.01
 2 6 -2 22.4 2.6
 -2 6 2 25.27 2.24
 2 6 -2 25.81 2.23
 -2 6 2 25.16 2.03
 -2 6 2 22.65 1.81
 -2 6 2 23.16 2.05
 1 -6 -2 5.7 0.83
 -1 -6 2 6.25 1.17
 1 -6 -2 4.96 1.11
 -1 -6 2 5.31 0.88
 -1 -6 2 4.01 0.81
 1 -6 -2 6.58 1.21
 1 -6 -2 5.18 1.31
 1 6 -2 6.48 1.29
 1 6 -2 5.73 1.08
 1 6 -2 4.84 1.1
 -1 6 2 7.47 1.26
 1 6 -2 6.97 1.53
 -1 6 2 4.86 1.12
 -1 6 2 4.47 1.12
 -1 6 2 5.06 1.22
 0 -6 -2 39.99 2.67
 0 -6 2 43.88 2.6
 0 -6 -2 37.28 2.9
 0 -6 -2 35.88 2.17
 0 -6 -2 44.8 2.72
 0 -6 2 45.18 2.11
 0 -6 2 42.65 2.03
 0 6 2 48.6 3.18
 0 6 -2 47.8 2.9
 0 6 -2 48.22 2.8
 0 6 2 49.26 2.9
 0 6 -2 47.84 2.42
 0 6 2 46.73 2.94
 0 6 -2 42.99 3.3
 1 -6 2 26.68 1.65
 1 -6 2 24.08 1.85
 -1 -6 -2 30.82 2.32
 -1 -6 -2 21.94 2.56
 -1 -6 -2 21.88 1.82
 -1 -6 -2 27.98 2.2
 -1 6 -2 27.42 1.6
 1 6 2 27.83 2.16
 -1 6 -2 26.65 1.68
 1 6 2 25.61 2.18
 1 6 2 27.71 2
 1 6 2 29.75 2.42
 -1 6 -2 30.46 2.16
 -1 6 -2 29.46 3.25
 -1 6 -2 25.23 1.92
 2 -6 2 -0.26 0.23
 -2 -6 -2 -0.27 0.43
 -2 -6 -2 -0.12 0.39
 2 -6 2 0.11 0.39
 -2 -6 -2 0.04 0.37
 -2 -6 -2 -0.05 0.38
 -2 6 -2 -0.13 0.4
 -2 6 -2 0.81 0.34
 -2 6 -2 -0.18 0.35
 -2 6 -2 0.93 0.43
 2 6 2 0.03 0.45
 2 6 2 0.85 0.69
 2 6 2 0.07 0.47
 2 6 2 -0.2 0.41
 3 -6 2 35.4 2.14
 -3 -6 -2 31.55 2.53
 -3 -6 -2 34.79 2.32
 -3 -6 -2 31.42 2.72
 3 -6 2 29.85 2.3
 -3 6 -2 38.13 2.19
 -3 6 -2 35.27 2.16
 3 6 2 37.25 2.76
 -3 6 -2 35.64 1.7
 3 6 2 41.22 2.76
 -3 6 -2 37.03 2.24
 3 6 2 34.98 2.62
 3 6 2 37.45 2.75
 -4 -6 -2 1.41 0.94
 -4 -6 -2 1.72 0.7
 -4 -6 -2 1.71 0.91
 4 -6 2 1.88 0.88
 4 -6 2 2.35 0.7
 -4 6 -2 3.52 0.79
 4 6 2 2.96 1.01
 -4 6 -2 2.67 0.83
 -4 6 -2 1.79 0.46
 4 6 2 2.35 0.97
 -4 6 -2 3.63 0.72
 -4 6 -2 2.13 0.56
 5 -6 2 2.86 1.14
 -5 -6 -2 4.32 1.35
 -5 -6 -2 5 1.07
 -5 -6 -2 4.32 1.37
 -5 6 -2 3.6 1.12
 5 6 2 5.43 1.31
 -5 6 -2 6.58 1.02
 -5 6 -2 4.63 0.8
 -5 6 -2 4.13 0.62
 -6 -6 -2 -0.28 0.56
 -6 -6 -2 -0.21 0.55
 6 -6 2 0.48 0.98
 6 6 2 -0.19 0.6
 -6 6 -2 0.47 0.68
 -6 6 -2 0.1 0.26
 -6 6 -2 -0.22 0.43
 -7 -6 -2 0.86 0.83
 -7 6 -2 1.68 1.14
 -7 -7 2 5.37 1.56
 -7 -7 2 4.17 1.85
 -7 -7 2 2.23 1.13
 -7 -7 2 3.27 1.08
 -7 7 2 2.05 1.09
 7 7 -2 1.69 0.85
 7 7 -2 1.31 0.85
 -7 7 2 4.21 1.08
 -7 7 2 3.83 1.41
 -6 -7 2 4.73 1.47
 6 -7 -2 5.11 1.15
 -6 -7 2 4.67 1.37
 -6 -7 2 5.95 1.39
 -6 7 2 6.7 1.67
 -6 7 2 5.73 1.26
 -6 7 2 4.16 0.89
 6 7 -2 3.6 1.1
 6 7 -2 5.72 1.39
 -6 7 2 5.68 1.5
 5 -7 -2 3.96 1.28
 5 -7 -2 3.7 1.01
 -5 -7 2 5.01 1.52
 -5 -7 2 4.92 1.34
 -5 -7 2 4.12 1.19
 5 7 -2 4.85 1.35
 -5 7 2 6.98 1.19
 5 7 -2 2.11 0.98
 -5 7 2 3.94 1.06
 -5 7 2 4.22 1.27
 -5 7 2 5.75 1.52
 4 -7 -2 8.03 1.6
 -4 -7 2 6.42 1.38
 -4 -7 2 9.49 1.96
 4 -7 -2 9.4 1.53
 -4 -7 2 6.22 1.36
 4 7 -2 8.92 1.64
 -4 7 2 9.56 1.42
 4 7 -2 9.99 1.85
 -4 7 2 11.14 1.94
 4 7 -2 5.44 1.34
 -4 7 2 9.55 1.56
 -4 7 2 11.29 1.88
 -3 -7 2 61.96 3.6
 -3 -7 2 62.69 3.48
 3 -7 -2 67.2 3.66
 -3 -7 2 70.28 4.4
 3 -7 -2 60.94 4.1
 3 -7 -2 61.9 3.61
 -3 7 2 74.1 4.34
 3 7 -2 75.96 4.1
 3 7 -2 64.14 3.83
 -3 7 2 75.94 3.68
 3 7 -2 71.94 4.23
 -3 7 2 68.98 3.82
 3 7 -2 67.5 4.24
 -3 7 2 68.71 3.92
 2 -7 -2 0.05 0.5
 2 -7 -2 0.15 0.23
 -2 -7 2 0.91 0.62
 -2 -7 2 -0.02 0.39
 2 -7 -2 0.09 0.62
 2 -7 -2 -0.29 0.39
 -2 -7 2 -0.16 0.38
 -2 7 2 -0.35 0.35
 2 7 -2 0.96 0.68
 -2 7 2 0.05 0.62
 2 7 -2 0.1 0.43
 2 7 -2 -0.02 0.49
 -2 7 2 -0.21 0.43
 -2 7 2 0.02 0.54
 2 7 -2 0.06 0.64
 -1 -7 2 5.05 1.13
 1 -7 -2 7.89 1.43
 -1 -7 2 7.28 1.12
 1 -7 -2 8.52 1.06
 1 -7 -2 7.93 1.44
 -1 -7 2 8.2 1.15
 1 -7 -2 7.62 1.71
 1 7 -2 12.67 2.23
 1 7 -2 13.33 1.9
 1 7 -2 12.7 1.62
 -1 7 2 10.87 1.76
 1 7 -2 9.16 1.7
 -1 7 2 8.25 1.67
 -1 7 2 8.17 1.59
 -1 7 2 8.04 1.45
 0 -7 -2 0.89 0.51
 0 -7 -2 2.92 1.1
 0 -7 2 0.29 0.35
 0 -7 2 0.39 0.49
 0 -7 2 1.85 0.59
 0 -7 -2 2.27 0.88
 0 -7 -2 0.9 0.62
 0 7 -2 1.16 0.54
 0 7 2 0.17 0.61
 0 7 -2 0.24 0.46
 0 7 2 1.58 0.9
 0 7 2 0.4 0.55
 0 7 -2 1.15 0.88
 0 7 -2 0.87 0.69
 -1 -7 -2 24.25 3.02
 -1 -7 -2 27.19 2.27
 -1 -7 -2 25.11 2.67
 -1 -7 -2 22.2 1.85
 1 -7 2 22.66 1.66
 1 -7 2 25.88 2.02
 1 7 2 27.63 2.32
 -1 7 -2 23.62 1.75
 -1 7 -2 29.06 1.73
 -1 7 -2 28.28 3.39
 1 7 2 28.84 2.57
 -1 7 -2 24.16 2.05
 1 7 2 28.87 2.46
 1 7 2 27.74 2.06
 -1 7 -2 26.07 2.19
 -2 -7 -2 5.56 1.57
 -2 -7 -2 3.53 0.95
 2 -7 2 3.85 0.93
 -2 -7 -2 5.81 1.19
 -2 -7 -2 3.59 1.09
 2 -7 2 3.25 0.86
 2 7 2 5.78 1.25
 2 7 2 9.3 1.88
 -2 7 -2 5.04 0.8
 -2 7 -2 7.04 1.3
 -2 7 -2 5.61 1.01
 2 7 2 5.35 1.44
 2 7 2 7.12 1.6
 -2 7 -2 6.6 1.26
 -2 7 -2 5.47 1.6
 -3 -7 -2 42.28 2.74
 -3 -7 -2 37.19 3.13
 3 -7 2 40.99 2.72
 -3 -7 -2 35.3 2.78
 -3 7 -2 44.88 1.99
 3 7 2 49.66 3.29
 -3 7 -2 43.35 2.56
 3 7 2 46.17 3.23
 -3 7 -2 44.07 2.63
 -3 7 -2 46 2.71
 -4 -7 -2 2.88 1.16
 -4 -7 -2 6.4 1.51
 4 -7 2 4.34 1.25
 -4 -7 -2 4.95 1.15
 -4 7 -2 5.01 1.02
 -4 7 -2 4.39 0.89
 -4 7 -2 6.32 0.83
 -4 7 -2 5.46 1.12
 -4 7 -2 5.74 0.73
 4 7 2 4.72 1.31
 -5 -7 -2 11.08 2.13
 -5 -7 -2 10.27 1.64
 -5 -7 -2 12.64 2.26
 5 -7 2 9.33 1.94
 -5 7 -2 12.07 1.42
 5 7 2 9.48 1.79
 -5 7 -2 12.52 1.87
 6 -7 2 2.02 1.16
 -6 -7 -2 1.03 0.94
 -6 -7 -2 0.14 0.74
 -6 7 -2 2.5 0.63
 -6 7 -2 2.05 0.95
 6 7 2 2.46 1.36
 -7 -8 2 7.1 1.72
 -7 -8 2 6.18 1.77
 -7 8 2 7.53 1.53
 7 8 -2 6.33 1.61
 -7 8 2 9.88 2.04
 -6 -8 2 3.17 1.27
 -6 -8 2 7.88 1.7
 6 -8 -2 5.02 1.26
 -6 -8 2 4.03 1.47
 -6 8 2 4.55 1.43
 6 8 -2 4.81 1.43
 -6 8 2 6.91 1.55
 -5 -8 2 0.9 0.81
 -5 -8 2 0.49 0.71
 5 -8 -2 1.4 0.77
 -5 -8 2 -0.64 0.57
 -5 8 2 2.13 0.9
 5 8 -2 1.29 0.87
 -5 8 2 2.02 0.95
 -5 8 2 1.32 0.63
 -4 -8 2 1.38 1.14
 4 -8 -2 3 1.03
 -4 -8 2 1.13 0.71
 -4 8 2 2.84 1.03
 -4 8 2 3.33 0.94
 -4 8 2 2.33 1.04
 4 8 -2 1.68 0.89
 -3 -8 2 26.43 2.21
 -3 -8 2 24.1 2.07
 3 -8 -2 22.54 2.55
 3 -8 -2 25.83 2.73
 3 8 -2 27.95 2.98
 3 8 -2 28.88 3.06
 -3 8 2 33.22 2.44
 -3 8 2 27.86 2.53
 -3 8 2 29.41 2.54
 2 -8 -2 6.28 1.37
 2 -8 -2 9.84 1.65
 -2 -8 2 9.91 1.5
 -2 -8 2 8.72 1.38
 2 -8 -2 8.64 0.78
 2 -8 -2 10.12 2.06
 2 8 -2 8.05 1.52
 -2 8 2 9.65 1.86
 -2 8 2 11.87 1.72
 2 8 -2 8.68 1.65
 -2 8 2 12.74 2.03
 2 8 -2 6.05 1.48
 1 -8 -2 6.71 0.99
 -1 -8 2 6 1.09
 1 -8 -2 6.47 1.36
 -1 -8 2 5.18 0.98
 1 -8 -2 10.13 2.14
 1 -8 -2 8.38 1.6
 -1 8 2 7.69 1.64
 1 8 -2 6.01 1.23
 -1 8 2 9.32 1.76
 -1 8 2 8.18 1.59
 1 8 -2 8.39 1.68
 1 8 -2 10.23 1.85
 0 -8 -2 1.15 0.81
 0 -8 2 0.7 0.46
 0 -8 2 0.1 0.38
 0 -8 -2 0.19 0.81
 0 -8 -2 0.05 0.41
 0 -8 -2 0.14 0.51
 0 8 -2 -0.26 0.61
 0 8 2 0.7 0.69
 0 8 2 1.14 0.83
 0 8 -2 0.04 0.53
 0 8 -2 -0.12 0.44
 -1 -8 -2 10.58 2.03
 -1 -8 -2 12.03 2.04
 -1 -8 -2 12.64 2.31
 1 -8 2 10.32 1.38
 -1 -8 -2 11.97 1.72
 1 8 2 15.36 2.27
 -1 8 -2 11.63 1.83
 1 8 2 13.29 1.75
 -1 8 -2 10.65 1.3
 -1 8 -2 15.01 2.05
 -2 -8 -2 24.49 2.2
 2 -8 2 23.21 1.94
 -2 -8 -2 24.91 2.58
 -2 -8 -2 25.86 3.35
 -2 8 -2 25.51 1.96
 2 8 2 23.29 2.52
 2 8 2 23.16 2.8
 -2 8 -2 26.06 1.56
 -2 8 -2 26.07 2.24
 -2 8 -2 26.19 2.2
 -3 -8 -2 0.18 0.87
 -3 -8 -2 2.69 1.1
 3 -8 2 2.4 0.9
 -3 -8 -2 1.87 0.86
 -3 8 -2 2.78 0.88
 3 8 2 1.58 0.94
 -3 8 -2 3.13 0.58
 -3 8 -2 3.63 1.04
 -3 8 -2 2.42 0.91
 -4 -8 -2 2.19 0.89
 -4 -8 -2 1.91 0.91
 -4 -8 -2 1.26 1.12
 4 -8 2 1.36 0.89
 4 8 2 1.02 0.84
 -4 8 -2 1.29 0.7
 -4 8 -2 1.77 0.77
 -5 -8 -2 0.41 0.77
 -5 -8 -2 -0.04 0.84
 5 8 2 0.93 0.88
 -5 8 -2 0.37 0.58
 -5 8 -2 0.02 0.48
 -6 -9 2 3.56 1.33
 -6 -9 2 3.49 1.59
 -6 9 2 6.91 1.58
 -6 9 2 6.12 1.6
 6 9 -2 4.33 1.57
 -5 -9 2 0.92 0.82
 5 -9 -2 2.3 0.98
 -5 -9 2 3.16 1.5
 5 9 -2 2.38 1.12
 -5 9 2 1.13 0.85
 -5 9 2 3.08 1.12
 -4 -9 2 3.61 1.18
 4 -9 -2 1.88 0.94
 -4 9 2 3.2 1.26
 -4 9 2 3.13 1.04
 4 9 -2 4.54 1.43
 -4 9 2 3.75 1.28
 3 -9 -2 2.16 0.92
 -3 -9 2 2.12 0.9
 -3 -9 2 2.79 0.97
 3 9 -2 3.7 1.34
 -3 9 2 4.97 1.44
 -3 9 2 3.71 1.15
 -3 9 2 4.12 1.29
 3 9 -2 2.88 1.11
 2 -9 -2 13.44 2.17
 -2 -9 2 13.29 1.79
 2 -9 -2 15.77 2.86
 -2 -9 2 12.1 1.69
 2 -9 -2 12.34 0.94
 -2 9 2 14.93 2.37
 2 9 -2 13.14 1.94
 -2 9 2 9.55 1.83
 2 9 -2 11.52 2.03
 -2 9 2 19.32 2.41
 -1 -9 2 20.35 1.7
 1 -9 -2 21.36 3.22
 1 -9 -2 18.86 1.45
 -1 -9 2 18.32 1.69
 1 -9 -2 23.06 2.81
 1 9 -2 21.11 2.79
 1 9 -2 20.01 2.24
 -1 9 2 27.52 3.19
 1 9 -2 20.04 2.72
 0 -9 2 11.02 1.46
 0 -9 -2 8.41 2.1
 0 -9 -2 9.15 1.87
 0 -9 2 10.2 1.25
 0 -9 -2 8.8 1.33
 0 9 -2 12.68 2.1
 0 9 -2 10.47 1.51
 0 9 -2 10.44 1.86
 0 9 2 13.37 2.34
 -1 -9 -2 2.63 1.24
 1 -9 2 0.62 0.58
 -1 -9 -2 0.76 0.62
 -1 9 -2 1.32 0.61
 -1 9 -2 1.14 0.86
 1 9 2 0.41 0.69
 -1 9 -2 0.56 0.65
 2 -9 2 2.84 0.94
 -2 -9 -2 3.33 1.51
 -2 -9 -2 3.61 1.06
 2 9 2 3.6 1.12
 -2 9 -2 2.16 0.93
 -2 9 -2 3.53 1
 -2 9 -2 4.38 1.22
 2 9 2 4.1 1.44
 3 -9 2 11.72 2.13
 -3 -9 -2 14.28 2.66
 -3 -9 -2 12.06 1.95
 3 9 2 13.1 2.32
 -3 9 -2 19.86 2.39
 -3 9 -2 15.95 2.01
 -4 -9 -2 9.48 2.28
 -4 -9 -2 10.68 2.01
 4 9 2 10.6 2.11
 -4 9 -2 11.29 1.69
 -4 9 -2 12.07 1.77
 4 -10 -2 3.89 1.41
 -4 -10 2 4.15 1.21
 -4 10 2 5.09 1.7
 -4 10 2 5.9 1.62
 4 10 -2 6.51 1.87
 -3 -10 2 1.68 0.9
 3 -10 -2 1.18 0.94
 3 10 -2 0.72 0.78
 -3 10 2 1.44 0.92
 -3 10 2 1.56 1.05
 2 -10 -2 6.31 1.58
 -2 -10 2 3.71 1.01
 -2 -10 2 4.92 1.19
 2 -10 -2 4.58 1.73
 -2 10 2 5.59 1.64
 2 10 -2 6.29 1.46
 2 10 -2 6.23 1.65
 -2 10 2 3.84 1.41
 -1 -10 2 2.65 0.88
 -1 -10 2 2.25 0.79
 1 -10 -2 3.14 1.38
 1 -10 -2 2.02 1.07
 1 10 -2 2.87 0.99
 1 10 -2 2.38 1.06
 -1 10 2 4.37 1.37
 0 -10 2 1.87 0.76
 0 -10 -2 3.91 0.98
 0 -10 2 2 0.63
 0 -10 -2 1.48 1.29
 0 10 -2 1.85 0.99
 0 10 2 0.35 0.83
 -1 -10 -2 10.39 1.64
 -1 -10 -2 9.52 2.26
 -1 10 -2 12.69 2.14
 -1 10 -2 13.44 2.21
 1 10 2 8.99 2.06
 -2 -10 -2 4.15 1.66
 -2 -10 -2 8.82 1.61
 -2 10 -2 10.6 1.72
 2 10 2 11.47 2.36
 -2 10 -2 9.63 1.82
 -3 -10 -2 4.93 1.4
 -3 10 -2 7.66 1.65
 3 10 2 10.01 2.2
 -10 0 3 2.01 1.44
 -10 0 3 1.27 0.94
 -9 0 3 0.18 0.56
 -9 0 3 0.59 1.01
 9 0 -3 -0.24 0.32
 8 0 -3 37.56 2.9
 8 0 -3 37.35 2.07
 -8 0 3 39.15 4.39
 -8 0 3 41.19 2.28
 -8 0 3 40.52 2.94
 7 0 -3 17.88 2.17
 7 0 -3 18.77 1.36
 -7 0 3 18.38 1.43
 7 0 -3 22.09 3.25
 -7 0 3 13.65 2.47
 -7 0 3 19.54 2.22
 -6 0 3 5.4 0.87
 6 0 -3 3.31 0.89
 -6 0 3 6.35 1.16
 6 0 -3 4.92 0.79
 -6 0 3 4.68 1.37
 6 0 -3 4.62 1.38
 5 0 -3 1.16 0.4
 -5 0 3 1.03 0.53
 -5 0 3 0.52 0.34
 5 0 -3 0.19 0.63
 -5 0 3 1.59 0.85
 5 0 -3 -0.03 0.33
 4 0 -3 4.09 0.82
 4 0 -3 4.43 0.71
 -4 0 3 5.81 0.81
 4 0 -3 4.75 1.15
 -4 0 3 5.34 0.91
 -4 0 3 7.54 1.39
 3 0 -3 4.58 0.35
 -3 0 3 4.45 0.75
 3 0 -3 5.33 1.06
 3 0 -3 5.68 0.71
 -3 0 3 5.12 0.72
 -3 0 3 6.87 1.14
 3 0 -3 6.24 0.87
 -2 0 3 484.21 13.29
 2 0 -3 484.88 13.4
 -2 0 3 460.63 12.94
 -2 0 3 461.54 13.09
 2 0 -3 461.8 13.11
 2 0 -3 468.07 12.92
 2 0 -3 481.38 12.64
 -1 0 3 6.39 0.66
 1 0 -3 5.5 0.61
 1 0 -3 6.69 0.74
 -1 0 3 6.27 0.66
 1 0 -3 5.94 0.66
 -1 0 3 6.56 0.75
 0 0 3 216.09 6.37
 0 0 -3 218.53 6.42
 0 0 -3 215.25 6.12
 0 0 -3 215.48 6.42
 0 0 3 212.85 6.11
 1 0 3 8.37 0.56
 -1 0 -3 9.69 1.02
 -1 0 -3 7.63 0.56
 1 0 3 9.87 0.84
 -2 0 -3 20.08 0.92
 -2 0 -3 22 1.39
 2 0 3 20.32 1.31
 2 0 3 20.76 0.89
 3 0 3 1.21 0.23
 -3 0 -3 1.67 0.58
 3 0 3 1.16 0.46
 -3 0 -3 1.43 0.62
 -4 0 -3 6 1.02
 4 0 3 5.17 0.44
 -4 0 -3 4.95 1.11
 4 0 3 6.66 0.4
 -4 0 -3 4.26 1.29
 -5 0 -3 23.92 2.63
 -5 0 -3 20.48 2.97
 5 0 3 21.76 0.89
 5 0 3 21.94 0.82
 -5 0 -3 23.77 1.77
 -6 0 -3 1.64 0.67
 -6 0 -3 3.89 1.52
 -6 0 -3 3.07 1.1
 -7 0 -3 3.49 0.97
 -7 0 -3 1.41 0.96
 -7 0 -3 2.91 1.52
 -8 0 -3 0.2 0.54
 -8 0 -3 0.29 0.71
 -8 0 -3 1.12 1.33
 -10 -1 3 0.13 1.05
 -10 -1 3 0.17 0.8
 -10 1 3 -0.45 0.92
 -10 1 3 0.82 0.8
 9 -1 -3 3.05 1.13
 9 -1 -3 3.99 0.89
 -9 -1 3 3.05 1.16
 -9 -1 3 0.11 0.85
 -9 1 3 0.85 1.05
 9 1 -3 1.98 0.68
 -9 1 3 3.39 1.05
 -8 -1 3 26.47 2.84
 -8 -1 3 26.93 1.86
 8 -1 -3 28.16 2.38
 8 -1 -3 25.18 1.6
 -8 -1 3 23.77 1.14
 -8 -1 3 22.15 3.36
 8 1 -3 30.05 2.67
 -8 1 3 30.32 2.4
 -8 1 3 22.84 1.65
 8 1 -3 29.55 1.85
 -8 1 3 23.06 3.32
 7 -1 -3 70.88 3.67
 -7 -1 3 70.39 3.17
 7 -1 -3 64.54 2.78
 -7 -1 3 63.14 3.71
 -7 -1 3 63.59 4.56
 7 -1 -3 67.28 4.69
 -7 1 3 75.2 3.13
 7 1 -3 72.22 4.07
 -7 1 3 73.7 4.79
 -7 1 3 71.95 3.69
 7 1 -3 72.76 3.18
 7 1 -3 68.52 4.84
 6 -1 -3 5.8 0.82
 -6 -1 3 5.46 1.19
 -6 -1 3 5.34 1.48
 6 -1 -3 7.12 1.21
 -6 -1 3 5.65 0.96
 6 -1 -3 2.18 1.05
 6 1 -3 5.08 0.3
 6 1 -3 5.7 1.56
 6 1 -3 5.18 1.14
 -6 1 3 6.65 1.57
 6 1 -3 6.3 0.95
 -6 1 3 5.44 0.82
 -6 1 3 5.44 1.01
 5 -1 -3 27.41 3
 5 -1 -3 25.5 1.46
 5 -1 -3 29.68 1.9
 -5 -1 3 27.45 2.01
 -5 -1 3 25.61 1.65
 -5 -1 3 24.03 2.76
 -5 1 3 22.53 1.66
 5 1 -3 25.04 0.9
 5 1 -3 28.48 3.09
 5 1 -3 26.53 1.59
 -5 1 3 24.6 2.26
 -5 1 3 24.71 1.47
 5 1 -3 26.24 1.99
 4 -1 -3 217.07 6.43
 4 -1 -3 204.16 7.7
 -4 -1 3 213.48 7.76
 -4 -1 3 207.89 6.66
 -4 -1 3 212.88 7.11
 4 -1 -3 209.9 6.77
 -4 1 3 213.74 5.76
 -4 1 3 221.88 6.82
 4 1 -3 222.07 6.74
 4 1 -3 212.38 6.1
 -4 1 3 222.78 7.8
 -4 1 3 219.75 6.56
 4 1 -3 213.98 7.25
 4 1 -3 187.35 7.67
 -3 -1 3 12.38 1
 3 -1 -3 13.79 1.59
 3 -1 -3 11.42 0.95
 3 -1 -3 12.04 0.76
 -3 -1 3 12.34 1.28
 3 -1 -3 12.93 0.9
 -3 -1 3 13.15 1.51
 3 1 -3 10.6 1.22
 -3 1 3 10.42 0.84
 3 1 -3 12.02 0.96
 -3 1 3 14.49 1.6
 -3 1 3 12.71 0.66
 -3 1 3 13.98 0.98
 3 1 -3 16.25 1.76
 -2 -1 3 20.23 1.28
 -2 -1 3 18.44 1.15
 2 -1 -3 19.73 1.11
 -2 -1 3 18.24 1.22
 2 -1 -3 19.84 1.13
 2 -1 -3 22.19 1.42
 2 -1 -3 16.8 0.99
 2 1 -3 18.1 1.24
 2 1 -3 19.54 1.32
 -2 1 3 20.61 1
 -2 1 3 20.11 1.11
 -2 1 3 19.42 1.34
 2 1 -3 18.91 1.15
 -1 -1 3 16.41 1.02
 -1 -1 3 18.4 0.88
 1 -1 -3 19.45 1.12
 1 -1 -3 20.1 1.24
 1 -1 -3 19.46 1.07
 -1 1 3 20.09 1.08
 1 1 -3 19.88 1.08
 1 1 -3 20.25 1.21
 -1 1 3 19.6 1.05
 -1 1 3 19.99 1.3
 1 1 -3 17.86 0.94
 0 -1 3 236.98 6.67
 0 -1 -3 231.18 7.16
 0 -1 -3 231.16 6.99
 0 -1 -3 231.96 6.76
 0 1 -3 238.6 6.74
 0 1 3 245.37 7.08
 0 1 -3 232.28 6.67
 0 1 3 237.73 6.83
 -1 -1 -3 59.76 2.6
 -1 -1 -3 64.62 2.35
 1 -1 3 64.2 2.13
 1 1 3 63.28 2.62
 -1 1 -3 66.93 2.13
 1 1 3 67.58 2.35
 -1 1 -3 68.02 2.66
 -2 -1 -3 6.15 0.92
 -2 -1 -3 7.96 0.81
 2 -1 3 5.78 0.43
 -2 -1 -3 4.99 0.95
 2 1 3 5.91 0.9
 2 1 3 6.54 0.67
 -2 1 -3 6.41 0.86
 -2 1 -3 6.5 0.37
 -3 -1 -3 29.1 1.83
 3 -1 3 28.74 1.01
 -3 -1 -3 29.89 2.15
 -3 1 -3 29.81 1.77
 3 1 3 28.56 1.34
 -3 1 -3 33.08 2.1
 -3 1 -3 28.72 2.34
 3 1 3 29.73 1.74
 -4 -1 -3 10.24 1.34
 -4 -1 -3 6.69 1.37
 -4 1 -3 8.45 1.18
 4 1 3 8.23 0.86
 -4 1 -3 6.96 1.56
 4 1 3 9.48 1.17
 4 1 3 9.51 0.72
 -4 1 -3 9.12 1.45
 -5 -1 -3 26.93 2.87
 -5 -1 -3 28.99 2.05
 5 1 3 31.49 1.5
 -5 1 -3 29.92 1.99
 -5 1 -3 27.72 3.31
 5 1 3 30.83 1.42
 -5 1 -3 30.95 2.45
 5 1 3 30.03 1.95
 -6 -1 -3 11.31 2
 -6 -1 -3 17.06 1.98
 -6 -1 -3 20.54 3.3
 6 1 3 15.29 0.99
 -6 1 -3 18.84 2.93
 -6 1 -3 18.87 1.98
 -6 1 -3 18.49 2.41
 6 1 3 16.75 1.01
 6 1 3 16.27 1.75
 -7 -1 -3 7.75 1.47
 -7 -1 -3 6.49 2.05
 -7 -1 -3 8.32 1.81
 -7 1 -3 6.86 1.55
 7 1 3 7.52 0.74
 -7 1 -3 4.49 1.75
 -7 1 -3 7.57 1.35
 -8 -1 -3 2.47 1.21
 -8 -1 -3 0.17 0.61
 -8 -1 -3 0.73 1.21
 -8 1 -3 0.85 0.94
 -8 1 -3 0.85 0.66
 -8 1 -3 1.36 1.17
 -10 -2 3 1.22 0.99
 -10 2 3 0.76 0.79
 -9 -2 3 7.45 2.18
 9 -2 -3 7.38 1.5
 -9 -2 3 8.73 1.84
 -9 2 3 8.56 2.28
 -9 2 3 7.68 1.5
 9 2 -3 10.76 1.46
 -8 -2 3 23.2 1.46
 -8 -2 3 25.18 1.9
 -8 -2 3 23.59 2.82
 8 -2 -3 23.17 2.07
 8 -2 -3 23.91 1.55
 -8 -2 3 21.8 3.4
 8 2 -3 27.99 1.93
 8 2 -3 24.99 1.16
 -8 2 3 26.95 1.1
 -8 2 3 24.87 1.27
 -8 2 3 23.17 1.6
 -8 2 3 20.29 3.17
 -8 2 3 28.02 2.19
 -7 -2 3 33.7 3.92
 -7 -2 3 34.26 1.78
 -7 -2 3 35.03 2.2
 7 -2 -3 35.44 2.37
 7 -2 -3 32.81 1.82
 -7 -2 3 32.87 2.64
 7 -2 -3 28.88 3.64
 -7 2 3 35.77 3.24
 -7 2 3 32.22 1.86
 7 2 -3 34.03 2.8
 -7 2 3 34.04 2.28
 -7 2 3 34.6 1.53
 -7 2 3 36.98 1.31
 7 2 -3 32.43 2.07
 7 2 -3 35.75 1.45
 -6 -2 3 6.74 1.64
 6 -2 -3 7.77 0.95
 -6 -2 3 6.45 1.32
 6 -2 -3 5.59 0.99
 6 -2 -3 10.93 2.06
 -6 -2 3 8.29 1.24
 -6 2 3 7.79 0.66
 -6 2 3 8.44 1.02
 6 2 -3 7.58 0.65
 -6 2 3 8.55 1.22
 6 2 -3 7.05 1.4
 6 2 -3 6.84 1.06
 -6 2 3 8.51 1.78
 5 -2 -3 33.06 1.93
 5 -2 -3 27.15 2.47
 -5 -2 3 34.49 2.36
 -5 -2 3 33.37 2.74
 5 -2 -3 33.31 1.71
 -5 -2 3 33.43 1.98
 5 2 -3 34.46 1.62
 -5 2 3 35.18 1.78
 -5 2 3 32.85 2.61
 -5 2 3 31.38 1.46
 5 2 -3 33.99 2.41
 -5 2 3 35.32 1.92
 5 2 -3 39.12 2.1
 4 -2 -3 144.22 4.69
 -4 -2 3 138.44 4.99
 -4 -2 3 149.6 5.45
 4 -2 -3 143.1 4.62
 -4 -2 3 143 5.89
 4 -2 -3 129.61 5.67
 4 -2 -3 138.79 4.73
 -4 2 3 141.38 4.74
 4 2 -3 148.59 6.1
 -4 2 3 147.41 4.53
 4 2 -3 137.48 4.78
 4 2 -3 135.9 5.49
 4 2 -3 153.21 5.17
 -4 2 3 151.39 5.91
 -4 2 3 155.82 4.83
 3 -2 -3 76.69 2.8
 -3 -2 3 80.54 3.2
 -3 -2 3 78.53 3.55
 -3 -2 3 80.91 3.39
 3 -2 -3 76.22 2.95
 3 -2 -3 73.14 3.49
 3 -2 -3 78.14 2.93
 3 2 -3 78.67 3.61
 -3 2 3 80.86 2.83
 -3 2 3 81.53 2.94
 -3 2 3 78.32 2.82
 3 2 -3 72.07 3.12
 -3 2 3 85.28 3.64
 3 2 -3 70.08 3.32
 3 2 -3 86.56 3.26
 -2 -2 3 193.14 6.18
 2 -2 -3 187.21 6.01
 -2 -2 3 198.82 6.15
 2 -2 -3 200.28 5.97
 2 -2 -3 185.84 6.34
 -2 -2 3 184.75 6.01
 2 -2 -3 194.8 5.73
 2 2 -3 185.25 6.19
 2 2 -3 197.59 6.39
 2 2 -3 201.64 6.24
 -2 2 3 197.22 6.03
 -2 2 3 206.47 6.05
 -2 2 3 195.81 6.51
 1 -2 -3 57.86 2.36
 -1 -2 3 56.73 2.36
 -1 -2 3 54.37 2.33
 1 -2 -3 57.1 2.48
 1 -2 -3 59.33 2.61
 -1 -2 3 57.05 1.77
 1 2 -3 58.46 1.96
 -1 2 3 60.43 2.73
 1 2 -3 60.64 2.41
 -1 2 3 63.07 2.5
 1 2 -3 58.79 2.47
 -1 2 3 56.81 2.33
 0 -2 -3 3.71 0.8
 0 -2 -3 4.74 0.73
 0 -2 3 5.05 0.7
 0 -2 -3 5.32 0.84
 0 2 -3 4.02 0.6
 0 2 3 6.55 0.79
 0 2 -3 4.38 0.34
 0 2 -3 5.25 0.29
 0 2 3 5.41 0.81
 0 2 -3 5.52 0.75
 -1 -2 -3 41.25 1.97
 1 -2 3 42.39 1.74
 -1 -2 -3 41.95 2.18
 1 2 3 43.89 2.14
 -1 2 -3 39.28 1.91
 -1 2 -3 43.87 1.66
 1 2 3 45.44 1.96
 2 -2 3 0.83 0.27
 -2 -2 -3 0.59 0.38
 -2 -2 -3 1.26 0.53
 -2 -2 -3 1.09 0.51
 -2 2 -3 0.59 0.24
 -2 2 -3 0.82 0.2
 2 2 3 0.88 0.38
 -2 2 -3 0.85 0.57
 2 2 3 1.16 0.47
 2 2 3 1.51 0.46
 -3 -2 -3 13.54 1.58
 3 -2 3 12.47 0.7
 -3 -2 -3 12.25 1.69
 3 2 3 13.94 1.03
 3 2 3 13.79 1.09
 -3 2 -3 12.1 1.7
 -3 2 -3 12.1 1.32
 3 2 3 11.74 1.31
 -4 -2 -3 14.54 2
 -4 -2 -3 15.99 1.77
 4 2 3 18.97 1.48
 4 2 3 19.24 1.34
 -4 2 -3 15.12 2.19
 -4 2 -3 17.13 1.41
 4 2 3 18.85 1.27
 -4 2 -3 17.23 1.98
 -5 -2 -3 -0.49 0.42
 -5 -2 -3 0.49 0.5
 -5 2 -3 0.1 0.42
 5 2 3 0.76 0.53
 5 2 3 0.53 0.38
 5 2 3 0.29 0.36
 -5 2 -3 0.66 0.73
 -5 2 -3 -0.21 0.27
 -6 -2 -3 33.66 2.97
 -6 -2 -3 34.07 2.47
 -6 2 -3 37.51 2.85
 -6 2 -3 32.67 3.75
 6 2 3 36.53 1.9
 -6 2 -3 33.53 2.23
 6 2 3 36.16 2.27
 -7 -2 -3 12.95 2.97
 -7 -2 -3 14.53 2.4
 -7 -2 -3 9.65 1.64
 -7 2 -3 4.23 1.76
 7 2 3 10.07 1.12
 -7 2 -3 10.96 1.95
 -7 2 -3 13.3 1.71
 -9 -3 3 2.07 0.98
 -9 -3 3 2.42 1.41
 9 -3 -3 2.77 0.92
 9 3 -3 3.86 0.98
 -9 3 3 1.62 1.2
 -9 3 3 3.69 0.97
 -8 -3 3 21.39 2.19
 8 -3 -3 20.78 1.5
 8 -3 -3 18.99 2.07
 -8 -3 3 21.14 1.65
 -8 -3 3 16.63 2.92
 -8 -3 3 18.79 2.6
 8 3 -3 22.48 1.3
 8 3 -3 20.45 1.79
 -8 3 3 19.38 1.4
 -8 3 3 24.46 1.91
 -8 3 3 20.24 1.1
 -8 3 3 25.76 3.49
 -8 3 3 19.45 1.44
 -7 -3 3 1.09 1.08
 -7 -3 3 2.21 1.01
 7 -3 -3 2.33 0.61
 -7 -3 3 3.19 0.77
 -7 -3 3 2.4 0.75
 7 -3 -3 2.14 0.71
 -7 3 3 2.99 0.67
 -7 3 3 2.75 0.62
 7 3 -3 2.1 0.7
 -7 3 3 4.17 0.89
 -7 3 3 3.86 1.39
 7 3 -3 2.92 1.29
 7 3 -3 2.93 0.59
 -6 -3 3 14.99 1.7
 -6 -3 3 16.11 2.12
 6 -3 -3 15.36 1.31
 -6 -3 3 12.56 2.34
 6 -3 -3 13.34 1.14
 6 -3 -3 16.18 2.44
 -6 -3 3 13.21 1.53
 -6 3 3 15.14 1.25
 6 3 -3 15.45 2.16
 6 3 -3 15 1.68
 -6 3 3 14.6 1.14
 6 3 -3 13.32 1.11
 -6 3 3 13.23 1.11
 -6 3 3 10.42 1.92
 -5 -3 3 23.48 2.86
 5 -3 -3 20.79 1.4
 -5 -3 3 20.55 2.25
 5 -3 -3 19.55 2.46
 5 -3 -3 22.9 1.44
 -5 -3 3 24.19 1.76
 5 3 -3 24.65 1.61
 -5 3 3 22.69 1.48
 -5 3 3 23.88 1.44
 -5 3 3 23.71 2.21
 5 3 -3 25.78 2.15
 5 3 -3 22.3 1.7
 -5 3 3 24.29 1.4
 -4 -3 3 128.22 5.65
 -4 -3 3 133.2 5.3
 -4 -3 3 135.72 5.01
 4 -3 -3 134.18 5.63
 4 -3 -3 125.63 4.78
 4 -3 -3 133.62 4.35
 4 -3 -3 135.22 4.64
 4 3 -3 144.41 5.7
 4 3 -3 137.62 5.15
 -4 3 3 146.42 4.5
 -4 3 3 145.09 4.8
 -4 3 3 141.92 4.92
 4 3 -3 142.2 5.26
 -4 3 3 144.16 5.83
 3 -3 -3 7.09 1.07
 3 -3 -3 7.62 0.65
 3 -3 -3 6.8 0.92
 -3 -3 3 8.2 1.13
 -3 -3 3 7.77 1.19
 3 -3 -3 7.65 1.25
 -3 -3 3 6.82 1.17
 3 3 -3 8.3 1.23
 -3 3 3 10.71 1.11
 3 3 -3 6.95 1.06
 -3 3 3 7.36 0.99
 3 3 -3 7.92 1.25
 -3 3 3 6.41 1.16
 -2 -3 3 26.64 1.61
 2 -3 -3 25.91 1.79
 2 -3 -3 28.1 1.79
 -2 -3 3 27.21 1.7
 2 -3 -3 29.65 1.68
 -2 -3 3 29.22 1.74
 -2 3 3 28.22 1.9
 2 3 -3 28.71 1.75
 -2 3 3 26.13 1.66
 2 3 -3 28.56 1.81
 -2 3 3 32.24 1.67
 1 -3 -3 15.19 1.32
 -1 -3 3 14.36 1.1
 1 -3 -3 16.09 1.35
 1 -3 -3 13.78 1.15
 -1 -3 3 14.14 0.77
 -1 -3 3 16.04 1.21
 -1 3 3 16.37 1.32
 1 3 -3 15.75 1.2
 1 3 -3 16.04 1.21
 -1 3 3 14.58 1.37
 -1 3 3 14.47 1.13
 0 -3 -3 154.72 5.66
 0 -3 -3 154.16 5.35
 0 -3 -3 156.51 5.66
 0 -3 3 160.84 5.2
 0 3 3 163.77 5.45
 0 3 -3 164.46 5.31
 0 3 -3 163.48 5.31
 0 3 3 164.93 5.71
 -1 -3 -3 1.82 0.64
 -1 -3 -3 0.8 0.5
 1 -3 3 2.17 0.52
 -1 -3 -3 2.28 0.69
 -1 -3 -3 1.29 0.51
 1 3 3 0.92 0.47
 1 3 3 1.89 0.55
 -1 3 -3 1.7 0.44
 -1 3 -3 1.3 0.36
 1 3 3 1.3 0.53
 -2 -3 -3 53.36 2.98
 -2 -3 -3 50.91 2.55
 2 -3 3 55.52 2.21
 -2 -3 -3 50.66 2.79
 -2 3 -3 51.33 2.54
 2 3 3 54.64 2.54
 -2 3 -3 53.95 2.18
 -2 3 -3 53.31 2
 2 3 3 54.38 2.76
 2 3 3 55.33 2.65
 -3 -3 -3 104.28 4.52
 3 -3 3 106.62 3.51
 -3 -3 -3 104.5 4.84
 3 3 3 112.27 4.51
 -3 3 -3 114.22 3.27
 -3 3 -3 106.46 4.72
 3 3 3 118.67 4.33
 -3 3 -3 113.07 3.35
 3 3 3 114.84 4.38
 -4 -3 -3 6.59 1.25
 -4 -3 -3 4.72 1.25
 4 -3 3 6.86 0.57
 4 3 3 5.11 0.97
 4 3 3 5.41 1.01
 4 3 3 5.86 0.96
 -4 3 -3 5.74 1.1
 -4 3 -3 6.83 1.47
 -5 -3 -3 0.32 0.47
 -5 -3 -3 -0.56 0.42
 -5 3 -3 0.69 0.52
 -5 3 -3 1.03 0.77
 5 3 3 0.05 0.39
 -5 3 -3 0.34 0.52
 5 3 3 0.32 0.45
 5 3 3 0.31 0.4
 -6 -3 -3 21.37 2.4
 -6 -3 -3 19.72 2.73
 -6 3 -3 23.14 2.99
 -6 3 -3 20.83 1.72
 6 3 3 18.73 1.52
 -6 3 -3 18.94 2.3
 6 3 3 21.63 1.8
 6 3 3 20.04 1.58
 -7 -3 -3 35.59 4.76
 -7 -3 -3 34.68 2.75
 -7 -3 -3 31.91 3.64
 -7 3 -3 36.65 2.91
 -7 3 -3 38.99 2.52
 -7 3 -3 33.77 3.94
 -9 -4 3 0.14 1.14
 -9 -4 3 0.88 0.85
 -9 4 3 -0.25 0.95
 9 4 -3 0.49 0.67
 -9 4 3 0.38 0.5
 8 -4 -3 0.07 0.41
 8 -4 -3 -0.14 0.36
 -8 -4 3 -0.79 0.91
 -8 -4 3 0.22 0.68
 -8 -4 3 0.07 0.52
 -8 -4 3 0.46 0.51
 -8 4 3 0.79 0.54
 8 4 -3 0.99 0.48
 8 4 -3 0.85 0.62
 -8 4 3 1.15 0.58
 -8 4 3 -0.13 0.86
 -7 -4 3 19.49 2.57
 -7 -4 3 19.01 3.07
 7 -4 -3 16.97 1.4
 -7 -4 3 17.93 2.05
 -7 -4 3 16.98 2
 7 -4 -3 17.98 1.46
 -7 4 3 18.16 1.55
 7 4 -3 19.17 1.48
 7 4 -3 18.68 2.11
 -7 4 3 16.22 1.29
 -7 4 3 21.14 2.87
 -7 4 3 18.51 1.41
 6 -4 -3 1.43 0.49
 -6 -4 3 1.49 0.76
 -6 -4 3 0.65 0.59
 -6 -4 3 -0.41 0.49
 -6 -4 3 1.14 0.64
 6 -4 -3 0.58 0.76
 6 -4 -3 1.12 0.52
 6 4 -3 1.37 0.67
 -6 4 3 1.68 0.49
 6 4 -3 1.75 0.88
 -6 4 3 1.71 1.01
 -6 4 3 1.45 0.6
 6 4 -3 1.72 0.64
 -6 4 3 1.5 0.45
 -5 -4 3 38.87 2.46
 5 -4 -3 40.58 1.84
 5 -4 -3 38.81 2.19
 5 -4 -3 41.55 3.05
 -5 -4 3 36.3 2.66
 -5 -4 3 39.2 3.14
 5 4 -3 42.56 2.99
 -5 4 3 42.47 2.16
 5 4 -3 47.8 2.63
 5 4 -3 42.61 2.63
 -5 4 3 43.91 3.07
 -5 4 3 43.86 2.46
 -5 4 3 45.51 1.85
 4 -4 -3 158.12 5.69
 4 -4 -3 164.07 6.17
 4 -4 -3 163.56 6.6
 4 -4 -3 170.98 5.03
 -4 -4 3 168.92 6.13
 -4 -4 3 165.29 6.35
 -4 -4 3 159.54 6.69
 -4 4 3 186.02 7.01
 -4 4 3 179.74 6.34
 4 4 -3 178.65 6.9
 4 4 -3 177.75 6.49
 4 4 -3 175.35 6.55
 -4 4 3 179.12 5.93
 -3 -4 3 92.94 4.05
 3 -4 -3 86.97 3.7
 -3 -4 3 94.98 3.99
 -3 -4 3 93.32 4.18
 3 -4 -3 87.7 4.06
 3 -4 -3 93.65 2.98
 3 -4 -3 91.99 4.2
 3 4 -3 100.5 4.27
 3 4 -3 100.13 4.38
 3 4 -3 93.84 4.4
 -3 4 3 99.4 4.43
 -3 4 3 104.01 3.88
 -3 4 3 101.41 4.19
 -2 -4 3 21.51 1.57
 2 -4 -3 19.4 1.73
 -2 -4 3 23.24 1.66
 2 -4 -3 17.78 1.57
 2 -4 -3 21.33 1.57
 -2 4 3 20.5 1.48
 -2 4 3 21.98 1.69
 2 4 -3 21.24 2.29
 2 4 -3 19.55 1.58
 2 4 -3 22.82 1.67
 -2 4 3 21.15 1.75
 1 -4 -3 47.54 2.54
 -1 -4 3 47.1 1.74
 1 -4 -3 49.46 2.67
 -1 -4 3 45.63 2.42
 -1 -4 3 49.24 2.28
 1 -4 -3 44.51 2.67
 1 4 -3 44.16 2.34
 1 4 -3 51.16 2.51
 -1 4 3 47.76 2.65
 -1 4 3 46.71 2.41
 -1 4 3 50.9 2.84
 0 -4 -3 75.03 3.27
 0 -4 -3 74.53 3.67
 0 -4 3 74.48 2.43
 0 -4 3 78.13 3.28
 0 -4 -3 82.62 3.52
 0 -4 -3 81.17 3.7
 0 4 -3 83.1 3.31
 0 4 3 92.72 3.89
 0 4 3 87.63 3.63
 0 4 -3 79.92 3.4
 0 4 3 89.68 3.91
 1 -4 3 28.51 1.69
 -1 -4 -3 29.58 2.18
 -1 -4 -3 24.38 1.88
 -1 -4 -3 29.85 1.97
 -1 -4 -3 25.52 2.03
 1 -4 3 29.34 1.49
 -1 4 -3 31.45 1.89
 1 4 3 30.04 2.08
 -1 4 -3 29.22 1.63
 1 4 3 31.97 1.97
 -1 4 -3 29.69 1.32
 -1 4 -3 30.21 1.71
 1 4 3 30.02 2.02
 -2 -4 -3 38.93 2.31
 -2 -4 -3 38.42 2.53
 2 -4 3 35.96 1.9
 -2 -4 -3 37.44 2.52
 2 -4 3 35 2.1
 2 4 3 38.01 2.44
 2 4 3 41.35 2.43
 -2 4 -3 41.87 1.93
 -2 4 -3 41.69 2.04
 -2 4 -3 40.02 2.03
 2 4 3 41.63 2.35
 3 -4 3 17.94 1.24
 -3 -4 -3 16.9 2.15
 -3 -4 -3 16.12 2.01
 3 -4 3 19.65 1.77
 3 4 3 17.6 1.85
 -3 4 -3 19.68 1.1
 -3 4 -3 21.29 1.72
 -3 4 -3 19.26 1.15
 3 4 3 20.43 1.62
 3 4 3 20.88 1.75
 -4 -4 -3 26.25 2.21
 -4 -4 -3 22.76 2.68
 4 -4 3 27.33 1.44
 4 4 3 24.36 1.95
 -4 4 -3 27.21 1.94
 4 4 3 27.48 2.1
 -4 4 -3 30.14 2.34
 4 4 3 28 1.96
 -4 4 -3 26.06 0.99
 -4 4 -3 27.86 1.02
 -5 -4 -3 5.99 1.53
 -5 -4 -3 8.67 1.62
 -5 4 -3 6.06 1.19
 -5 4 -3 7.09 1.53
 5 4 3 6.68 1.25
 5 4 3 6.34 1.19
 5 4 3 5.17 1.04
 -6 -4 -3 3.38 1.21
 -6 -4 -3 3.93 1.15
 -6 4 -3 2.63 0.9
 6 4 3 4.11 1.53
 -6 4 -3 3.77 1.1
 -6 4 -3 3 1.14
 -7 -4 -3 0.83 0.9
 -7 -4 -3 1.49 0.82
 -7 4 -3 2.03 1.12
 -7 4 -3 0.59 0.75
 -7 4 -3 3.23 0.94
 -9 -5 3 -0.33 0.76
 -9 -5 3 0.36 1.05
 -9 5 3 0.33 0.5
 -9 5 3 0.67 1.06
 8 -5 -3 7.72 1.41
 -8 -5 3 11.81 1.84
 -8 -5 3 11.49 2.1
 -8 -5 3 9.17 2.46
 -8 -5 3 9.12 1.65
 8 5 -3 11.16 1.73
 -8 5 3 10.87 1.23
 -8 5 3 10.69 2.28
 -8 5 3 11.23 1.54
 8 5 -3 11.93 1.5
 -8 5 3 7.9 1.9
 -7 -5 3 6.67 1.56
 7 -5 -3 8.38 1.26
 7 -5 -3 6.18 0.84
 -7 -5 3 5.31 1.76
 -7 -5 3 8.99 1.64
 -7 -5 3 7.39 1.41
 -7 5 3 7.5 1.81
 -7 5 3 5.44 0.94
 -7 5 3 8.02 0.88
 7 5 -3 6.09 1.3
 7 5 -3 7.57 1.3
 -7 5 3 5.96 1.2
 6 -5 -3 11.96 1.49
 6 -5 -3 10.7 1.96
 -6 -5 3 10.7 1.83
 -6 -5 3 14.81 2.06
 -6 -5 3 10.52 2.21
 -6 -5 3 13.31 1.81
 6 -5 -3 12.98 0.91
 -6 5 3 14.02 1.79
 -6 5 3 15.96 2.35
 6 5 -3 13.16 1.68
 6 5 -3 10.55 1.68
 -6 5 3 14.11 1.45
 -5 -5 3 24.16 2.95
 -5 -5 3 22.17 2.5
 -5 -5 3 24.54 2.02
 5 -5 -3 25.86 1.85
 5 -5 -3 21.83 1.1
 5 -5 -3 25 2.85
 -5 5 3 23.15 1.6
 -5 5 3 24.48 2
 5 5 -3 22.56 2.68
 5 5 -3 26.45 2.12
 5 5 -3 22.97 2.01
 -5 5 3 26.82 2.89
 4 -5 -3 23.14 1.05
 4 -5 -3 24.02 2.17
 4 -5 -3 25.54 1.84
 -4 -5 3 21.55 2.27
 4 -5 -3 20.79 2.31
 -4 -5 3 22.13 2.35
 4 5 -3 22.79 1.93
 -4 5 3 24.72 1.68
 -4 5 3 25.49 2.19
 -4 5 3 21.87 1.9
 4 5 -3 24.79 2.64
 4 5 -3 26.47 2.19
 -3 -5 3 9.57 1.39
 3 -5 -3 11.79 1.69
 -3 -5 3 13.6 1.67
 3 -5 -3 10 0.66
 3 -5 -3 10.18 1.43
 3 -5 -3 10.94 1.69
 3 5 -3 12.65 1.67
 -3 5 3 10.58 1.59
 3 5 -3 10.62 1.51
 -3 5 3 12.26 1.42
 3 5 -3 12.5 1.8
 -3 5 3 10.86 1.54
 -2 -5 3 1.38 0.52
 2 -5 -3 0.98 0.38
 2 -5 -3 0.88 0.66
 2 -5 -3 1.58 0.62
 -2 -5 3 0.29 0.34
 2 -5 -3 0.98 0.57
 2 5 -3 2.99 0.81
 2 5 -3 3.16 1
 -2 5 3 1.3 0.56
 -2 5 3 1.75 0.76
 -2 5 3 2.17 0.78
 2 5 -3 1.46 0.65
 -2 5 3 2.4 0.81
 -1 -5 3 2.39 0.46
 -1 -5 3 1.46 0.59
 1 -5 -3 2.66 0.62
 -1 -5 3 2.26 0.6
 1 -5 -3 2.57 0.83
 1 -5 -3 2.04 0.83
 1 -5 -3 1.98 0.69
 -1 5 3 2.45 0.72
 -1 5 3 2.31 0.81
 1 5 -3 2.12 0.69
 -1 5 3 2.45 0.8
 1 5 -3 2.58 1.06
 -1 5 3 2.65 0.81
 1 5 -3 1.89 0.68
 0 -5 3 59.87 2.18
 0 -5 -3 60.09 3.25
 0 -5 -3 56.66 3.36
 0 -5 -3 57.07 2.85
 0 -5 -3 57.1 3.1
 0 -5 3 57.3 2.9
 0 -5 3 58.36 2.53
 0 5 3 66.23 3.25
 0 5 3 67.73 3.56
 0 5 3 66.4 3.41
 0 5 -3 63.45 3.09
 0 5 -3 64.15 2.89
 -1 -5 -3 19.47 2.06
 -1 -5 -3 18.16 1.93
 1 -5 3 17.93 1.48
 1 -5 3 17.34 1.19
 -1 -5 -3 15.34 1.98
 -1 -5 -3 16.22 2
 1 5 3 16.2 1.94
 1 5 3 18.18 2
 -1 5 -3 18.43 1.45
 -1 5 -3 18.06 1.29
 -1 5 -3 19.33 1.1
 -1 5 -3 19.88 1.61
 1 5 3 19.15 1.65
 2 -5 3 8.66 1.19
 -2 -5 -3 9.68 1.62
 -2 -5 -3 9.79 1.51
 2 -5 3 9.94 1.32
 -2 -5 -3 8.39 1.55
 -2 -5 -3 6.32 1.26
 -2 5 -3 8.84 1.02
 -2 5 -3 10.16 1.27
 2 5 3 10.74 1.62
 -2 5 -3 9.32 1.14
 2 5 3 6.99 1.26
 -2 5 -3 7.54 0.97
 2 5 3 10.83 1.57
 3 -5 3 39.69 2.14
 3 -5 3 37.03 2.51
 -3 -5 -3 44.77 3.03
 -3 -5 -3 38.66 2.85
 -3 5 -3 37.82 1.97
 3 5 3 40.15 2.71
 -3 5 -3 42.98 2.39
 3 5 3 42.86 2.64
 -3 5 -3 43.31 2.11
 3 5 3 42.88 2.78
 -4 -5 -3 29.14 3.11
 -4 -5 -3 28.95 2.5
 4 -5 3 31.6 2.57
 4 -5 3 28.45 1.71
 -4 5 -3 32.07 1.47
 -4 5 -3 29.83 1.99
 4 5 3 28.34 2.93
 4 5 3 29.26 2.26
 -4 5 -3 29.48 2.24
 -4 5 -3 29.47 1.45
 4 5 3 26.59 2.21
 -5 -5 -3 2.56 1.05
 -5 -5 -3 2.65 1.04
 -5 5 -3 5.16 1.3
 -5 5 -3 4.83 0.29
 -5 5 -3 7.03 1.25
 5 5 3 4.48 1.16
 -5 5 -3 5.32 0.31
 -6 -5 -3 1.43 1
 -6 -5 -3 -0.29 0.58
 -6 5 -3 0.7 0.85
 -6 5 -3 0.73 0.64
 -7 -5 -3 20.04 2.69
 -7 5 -3 15 1.85
 -7 5 -3 18.08 2.73
 -8 -6 3 4.72 1.44
 -8 -6 3 2.62 1.55
 -8 -6 3 4.22 1.36
 -8 6 3 4.57 1.59
 8 6 -3 4.15 1.17
 8 6 -3 5.1 1.49
 -8 6 3 5.29 1.22
 -7 -6 3 -0.41 0.54
 -7 -6 3 1.59 1.22
 -7 -6 3 0.3 0.67
 -7 -6 3 1.8 0.85
 7 -6 -3 1.76 0.73
 -7 6 3 0.85 0.71
 -7 6 3 1.1 0.61
 -7 6 3 1.51 1.03
 -7 6 3 0.95 0.65
 7 6 -3 0.97 0.76
 7 6 -3 0.48 0.63
 6 -6 -3 16.14 1.91
 -6 -6 3 13.18 2.46
 -6 -6 3 12.88 2.08
 -6 -6 3 13.46 1.93
 -6 -6 3 14.4 2.24
 -6 6 3 14.63 1.88
 -6 6 3 13.81 2.24
 6 6 -3 11.93 1.86
 -6 6 3 14.56 1.59
 6 6 -3 13.35 1.97
 -6 6 3 15.39 2.07
 5 -6 -3 27.42 2.11
 -5 -6 3 33.55 2.64
 -5 -6 3 31.89 2.45
 5 -6 -3 25.93 2.97
 5 6 -3 31.67 2.51
 -5 6 3 36.03 2.16
 5 6 -3 32.51 2.58
 -5 6 3 38.54 2.97
 -5 6 3 32.19 2.54
 -5 6 3 29.9 2.3
 5 6 -3 34.85 2.88
 4 -6 -3 18.75 2.48
 -4 -6 3 18.37 2.16
 4 -6 -3 20.01 2.13
 -4 -6 3 21.78 2.32
 4 -6 -3 15.86 2.11
 -4 6 3 23.61 2.11
 4 6 -3 21.95 2.44
 -4 6 3 22.2 2.39
 4 6 -3 20.82 2.54
 -4 6 3 22.42 2.54
 4 6 -3 23.57 2.73
 -4 6 3 18.64 1.59
 3 -6 -3 19.66 0.94
 -3 -6 3 20.42 2.19
 3 -6 -3 19.62 1.04
 3 -6 -3 18.29 2.14
 3 -6 -3 22.99 2.7
 3 -6 -3 20.93 1.82
 -3 -6 3 23.17 1.93
 -3 6 3 22.34 1.78
 -3 6 3 21.66 2.29
 -3 6 3 22.17 2.46
 3 6 -3 21.11 2.31
 3 6 -3 22.09 2.39
 3 6 -3 24.69 2.88
 -3 6 3 23.87 2.14
 2 -6 -3 0.85 0.57
 2 -6 -3 0.27 0.6
 -2 -6 3 0.67 0.51
 -2 -6 3 1.23 0.59
 2 -6 -3 1.05 0.41
 2 -6 -3 0.93 0.59
 -2 -6 3 0.94 0.47
 2 6 -3 2.35 0.84
 -2 6 3 0.58 0.61
 2 6 -3 0.73 0.72
 2 6 -3 1.71 0.71
 -2 6 3 1.01 0.58
 -2 6 3 0.92 0.67
 -2 6 3 1.09 0.66
 -1 -6 3 9.57 0.86
 1 -6 -3 9.43 1.49
 -1 -6 3 11.28 1.34
 -1 -6 3 7.03 1.25
 1 -6 -3 9.5 1.5
 1 -6 -3 9.03 1.7
 1 -6 -3 9.91 1.2
 -1 6 3 14.03 1.86
 1 6 -3 10.12 1.38
 -1 6 3 10.02 1.66
 -1 6 3 9.32 1.64
 1 6 -3 3.66 1.23
 -1 6 3 10.01 1.48
 1 6 -3 11.13 1.59
 0 -6 3 16.49 1.24
 0 -6 -3 18.14 2.16
 0 -6 -3 18.42 2.4
 0 -6 -3 16.48 1.74
 0 -6 3 16.18 1.09
 0 -6 3 15.31 1.76
 0 -6 -3 19.61 2.2
 0 6 3 15.99 1.91
 0 6 -3 17.94 1.95
 0 6 -3 16.96 1.41
 0 6 3 18.54 2.27
 0 6 3 17.87 2.1
 0 6 -3 15.01 2.31
 0 6 -3 17.64 2.09
 -1 -6 -3 5.26 1.24
 1 -6 3 7.91 1.26
 -1 -6 -3 6.11 1.23
 -1 -6 -3 7.6 1.58
 1 -6 3 7.46 0.96
 -1 -6 -3 8.5 1.5
 1 6 3 5.77 1.26
 -1 6 -3 7.75 1.28
 1 6 3 9.92 1.68
 -1 6 -3 7.14 1.06
 -1 6 -3 7.57 0.94
 1 6 3 6.64 1.22
 -1 6 -3 9.67 1.47
 -2 -6 -3 5.94 1.32
 -2 -6 -3 6.68 1.34
 2 -6 3 7.46 1.18
 2 -6 3 9.66 1.33
 -2 -6 -3 6.77 1.51
 -2 -6 -3 9.01 1.54
 -2 6 -3 10.44 1.35
 2 6 3 9.74 1.65
 2 6 3 14.54 1.97
 2 6 3 10.49 1.62
 -2 6 -3 8.57 1.33
 -2 6 -3 9.71 1.1
 -2 6 -3 9.88 1.13
 3 -6 3 0.53 0.46
 3 -6 3 0.9 0.59
 -3 -6 -3 -0.22 0.49
 -3 -6 -3 1.18 0.79
 -3 6 -3 -0.08 0.34
 -3 6 -3 0.1 0.42
 3 6 3 0.21 0.54
 -3 6 -3 -0.07 0.32
 -3 6 -3 0.56 0.44
 3 6 3 0.06 0.64
 4 -6 3 4.38 0.9
 -4 -6 -3 4.78 1.43
 4 -6 3 4.86 1.21
 -4 -6 -3 3.85 1.19
 4 6 3 7.55 1.54
 -4 6 -3 6.09 0.9
 -4 6 -3 8.39 1.05
 -4 6 -3 5.88 0.9
 -4 6 -3 5.82 1.14
 -5 -6 -3 0.69 0.76
 5 -6 3 1.12 0.91
 -5 -6 -3 0.47 0.73
 -5 6 -3 0.47 0.63
 5 6 3 0.7 0.75
 -5 6 -3 0.5 0.57
 -5 6 -3 0.25 0.27
 -6 -6 -3 1.02 0.94
 -6 -6 -3 -0.01 0.75
 -6 6 -3 1.07 0.83
 -8 -7 3 0.4 0.87
 -8 -7 3 0.5 1.15
 -8 7 3 -0.18 0.51
 8 7 -3 0.84 0.85
 -8 7 3 -0.43 0.75
 7 -7 -3 0.99 0.72
 -7 -7 3 1.37 1.02
 -7 -7 3 1.42 0.88
 -7 -7 3 1.48 1.24
 -7 -7 3 1.73 1.04
 -7 7 3 0.67 0.75
 7 7 -3 0.63 0.74
 -7 7 3 2.12 1.16
 -7 7 3 0.31 0.55
 7 7 -3 0.34 0.72
 -6 -7 3 2.42 1.09
 -6 -7 3 0.85 0.72
 6 -7 -3 0.22 0.53
 -6 -7 3 0.59 0.97
 -6 7 3 4.49 1.31
 -6 7 3 0.37 0.49
 -6 7 3 1 0.7
 -6 7 3 1.03 0.82
 6 7 -3 3.27 1.14
 6 7 -3 0.67 0.86
 -5 -7 3 0.34 0.61
 -5 -7 3 2.26 0.92
 5 -7 -3 1.86 0.83
 -5 7 3 1.6 0.73
 5 7 -3 2 0.98
 5 7 -3 1.25 0.89
 -5 7 3 1.94 1.04
 -5 7 3 1.83 0.76
 -5 7 3 3.25 1.18
 4 -7 -3 20.6 2.6
 -4 -7 3 18.5 2.25
 -4 -7 3 18.61 2.26
 4 -7 -3 18.37 2.15
 4 -7 -3 14.13 2.32
 -4 7 3 19.22 2.49
 4 7 -3 18.68 2.54
 -4 7 3 24.66 2.88
 -4 7 3 22.39 1.84
 -4 7 3 20.69 2.38
 4 7 -3 25.22 2.77
 4 7 -3 16.73 2.3
 -3 -7 3 13.15 1.91
 3 -7 -3 12.93 2.22
 -3 -7 3 13.37 1.82
 3 -7 -3 11.3 0.77
 3 -7 -3 13.54 1.95
 3 -7 -3 10.48 1.68
 -3 7 3 13.8 2.16
 3 7 -3 16.01 2.42
 -3 7 3 13.06 1.75
 3 7 -3 13.73 1.95
 -3 7 3 11.51 1.79
 -3 7 3 12.01 1.97
 3 7 -3 12.51 1.89
 2 -7 -3 9.8 1.06
 -2 -7 3 8.64 1.36
 2 -7 -3 9.49 1.57
 2 -7 -3 11.74 2.09
 2 -7 -3 14.46 1.99
 -2 -7 3 7.94 1.49
 -2 -7 3 8.01 1.15
 -2 7 3 11.07 1.92
 -2 7 3 12.34 1.72
 2 7 -3 10.49 1.86
 2 7 -3 6.92 1.61
 2 7 -3 10.76 1.71
 -2 7 3 8.76 1.6
 -2 7 3 9.6 1.78
 2 7 -3 9.6 1.56
 1 -7 -3 15.18 2.34
 1 -7 -3 10.29 1.28
 -1 -7 3 12.55 1.43
 -1 -7 3 11.02 1.62
 1 -7 -3 17.22 2.14
 1 -7 -3 16.23 2.17
 -1 -7 3 14.08 1.15
 1 7 -3 10.2 2.09
 -1 7 3 17.17 2.36
 1 7 -3 14.93 2.15
 -1 7 3 14.2 2.13
 1 7 -3 16.28 1.89
 -1 7 3 13.25 1.96
 -1 7 3 19.32 2.15
 1 7 -3 10.72 1.68
 0 -7 3 1.06 0.43
 0 -7 3 1.85 0.59
 0 -7 -3 1.48 0.74
 0 -7 3 1.1 0.64
 0 -7 -3 1.05 0.57
 0 -7 -3 1.42 0.92
 0 -7 -3 1.2 0.71
 0 7 -3 1.69 0.77
 0 7 3 0.74 0.7
 0 7 3 0.5 0.57
 0 7 -3 1.38 0.72
 0 7 3 1.5 0.91
 0 7 -3 1.33 1
 0 7 -3 0.44 0.47
 -1 -7 -3 4.72 1.2
 -1 -7 -3 3.29 0.9
 1 -7 3 3.59 0.93
 -1 -7 -3 4.35 1.35
 1 -7 3 4.95 0.9
 -1 -7 -3 4.18 1.17
 1 7 3 3.5 1.18
 -1 7 -3 6.6 1.05
 -1 7 -3 3.81 0.79
 -1 7 -3 6.75 1.3
 1 7 3 5.78 1.48
 -1 7 -3 7.29 1.38
 -2 -7 -3 11.54 1.77
 -2 -7 -3 12.23 2.1
 -2 -7 -3 12.62 1.97
 2 -7 3 11.81 1.5
 -2 7 -3 14.47 1.87
 2 7 3 15.65 2.22
 -2 7 -3 12.94 1.21
 -2 7 -3 17.7 1.95
 -2 7 -3 14.46 1.23
 3 -7 3 8.59 1.44
 -3 -7 -3 5.34 1.56
 -3 -7 -3 5.69 1.36
 -3 7 -3 10.73 1.47
 3 7 3 8.92 1.69
 -3 7 -3 7.36 1.23
 -3 7 -3 8.77 1.08
 -3 7 -3 10.1 1.32
 4 -7 3 12.25 1.89
 -4 -7 -3 13.08 2.15
 -4 -7 -3 10.3 2.06
 4 7 3 15.01 2.27
 -4 7 -3 15.96 1.64
 -4 7 -3 17.14 1.93
 -4 7 -3 16.31 1.44
 -5 -7 -3 0.62 0.82
 -5 -7 -3 0.28 0.8
 -5 7 -3 1.64 0.57
 5 7 3 2.25 1.07
 -5 7 -3 2.1 0.88
 -7 -8 3 5.16 1.58
 -7 -8 3 6.76 2.08
 7 8 -3 8.4 1.79
 -7 8 3 6.44 1.74
 -7 8 3 5.65 1.42
 6 -8 -3 3.98 1.13
 -6 -8 3 6.08 1.56
 6 8 -3 6.28 1.59
 -6 8 3 4.18 1.47
 -6 8 3 4.68 1.22
 -5 -8 3 0.13 0.73
 5 -8 -3 2.77 1
 -5 8 3 4.55 1.37
 -5 8 3 3.13 0.93
 -5 8 3 2.6 1
 5 8 -3 4.82 1.38
 4 -8 -3 -0.55 0.66
 -4 -8 3 0.74 0.65
 4 -8 -3 0.77 0.75
 -4 8 3 -0.19 0.49
 -4 8 3 0.05 0.46
 -4 8 3 0.38 0.7
 4 8 -3 0.02 0.43
 3 -8 -3 15.89 2.64
 3 -8 -3 19.06 2.34
 -3 -8 3 15.87 1.81
 -3 -8 3 19.47 2.22
 3 -8 -3 15.31 0.88
 -3 8 3 16.83 2.35
 -3 8 3 18.23 2.21
 3 8 -3 22.36 2.63
 -3 8 3 17.47 2.49
 3 8 -3 22.8 2.67
 2 -8 -3 1.88 0.92
 2 -8 -3 3.12 0.65
 -2 -8 3 3.03 0.82
 2 -8 -3 2.54 1.13
 -2 -8 3 3.71 0.98
 -2 8 3 4 1.24
 -2 8 3 6.81 1.64
 2 8 -3 4.15 1.35
 2 8 -3 2.92 1.06
 -2 8 3 3.3 1.01
 2 8 -3 4.42 1.1
 1 -8 -3 1.02 0.76
 -1 -8 3 1.02 0.53
 -1 -8 3 1.38 0.54
 1 -8 -3 1.31 0.52
 1 -8 -3 0.17 0.73
 -1 8 3 2.41 0.93
 -1 8 3 1.48 0.91
 1 8 -3 1.29 0.83
 -1 8 3 1.79 0.99
 1 8 -3 1.55 0.83
 1 8 -3 1.19 0.69
 0 -8 -3 3.07 1.2
 0 -8 3 2.08 0.63
 0 -8 -3 2.12 0.76
 0 -8 3 2.33 0.66
 0 -8 -3 4.73 1.31
 0 8 -3 2.12 0.84
 0 8 -3 1.8 0.96
 0 8 -3 5.09 1.09
 0 8 3 1.98 0.98
 -1 -8 -3 1.55 0.77
 1 -8 3 2.09 0.68
 -1 -8 -3 2.3 1.13
 -1 -8 -3 2.41 1.04
 1 8 3 2.99 1.19
 -1 8 -3 2.55 0.76
 -1 8 -3 1.13 0.71
 -1 8 -3 0.47 0.64
 2 -8 3 31.22 2.18
 -2 -8 -3 31.2 3.66
 -2 -8 -3 25.66 2.77
 2 8 3 34.62 3.01
 -2 8 -3 34.71 2.03
 -2 8 -3 34.21 2.5
 -2 8 -3 33.56 2.12
 -2 8 -3 32.26 2.53
 -3 -8 -3 6.54 1.55
 3 -8 3 5.89 1.23
 -3 -8 -3 11.32 2.3
 -3 8 -3 11.77 1.53
 -3 8 -3 8.87 1.46
 3 8 3 7.8 1.75
 -4 -8 -3 8.45 1.87
 -4 -8 -3 13.3 2.43
 -4 8 -3 11.72 1.59
 4 8 3 10.57 2.03
 -4 8 -3 12.27 1.62
 -5 -8 -3 0.63 1
 -5 -8 -3 2.12 1.19
 -5 8 -3 0.87 0.54
 5 8 3 1.12 0.99
 -6 -9 3 3.55 1.3
 6 -9 -3 2.73 1.27
 -6 9 3 3.35 1.2
 -6 9 3 4.14 1.43
 6 9 -3 3.13 1.3
 5 -9 -3 0.38 0.69
 -5 -9 3 -0.42 0.52
 5 9 -3 0.07 0.71
 -5 9 3 1.6 0.95
 -5 9 3 -0.17 0.7
 -5 9 3 0.8 0.76
 -4 -9 3 4.05 1.2
 -4 -9 3 4.24 1.11
 4 -9 -3 4.51 1.3
 -4 9 3 3.12 1.26
 4 9 -3 4.34 1.33
 -4 9 3 4.19 1.34
 -4 9 3 5.29 1.27
 -3 -9 3 12.45 1.69
 3 -9 -3 14.57 2.21
 -3 -9 3 12.45 1.82
 3 -9 -3 9.18 2.21
 3 9 -3 17.27 2.6
 -3 9 3 17.27 2.61
 -3 9 3 15.21 2.34
 3 9 -3 13.71 2.14
 -3 9 3 16.53 2.2
 -2 -9 3 1.89 0.72
 2 -9 -3 2.24 0.6
 2 -9 -3 2.67 1.1
 2 -9 -3 0.36 0.89
 -2 -9 3 3.56 1.01
 -2 9 3 3.65 1.36
 2 9 -3 2.86 1.04
 2 9 -3 3.06 1.06
 -2 9 3 2.4 1.2
 1 -9 -3 0.89 0.84
 1 -9 -3 4.26 0.93
 1 -9 -3 4.95 1.66
 -1 -9 3 6 1.12
 -1 -9 3 5.02 0.97
 1 9 -3 4.96 1.47
 1 9 -3 3.72 1.13
 -1 9 3 5.5 1.53
 1 9 -3 3.2 1.1
 0 -9 3 0.66 0.47
 0 -9 3 0.09 0.42
 0 -9 -3 -0.28 0.4
 0 -9 -3 0.04 0.85
 0 -9 -3 1.61 0.94
 0 9 -3 -0.11 0.52
 0 9 -3 1.34 0.71
 0 9 -3 0.67 0.73
 0 9 3 1.37 0.93
 1 -9 3 2.54 1.07
 -1 -9 -3 3.28 1.29
 -1 -9 -3 1.73 1.18
 -1 -9 -3 0.84 0.73
 -1 9 -3 1.72 0.86
 1 9 3 2.41 1.14
 -1 9 -3 3.46 1.22
 -1 9 -3 1.62 0.73
 -2 -9 -3 9.3 2.13
 -2 -9 -3 8.56 1.6
 -2 9 -3 14.28 2
 -2 9 -3 10.71 1.49
 2 9 3 10.64 2.16
 -3 -9 -3 5.79 1.53
 -3 -9 -3 6.3 1.79
 -3 9 -3 4.43 1.15
 3 9 3 5.4 1.61
 -4 -10 3 1.28 0.98
 4 -10 -3 1.21 1.01
 -4 10 3 4.58 1.58
 4 10 -3 3.86 1.48
 3 -10 -3 7.08 2.05
 -3 -10 3 5.65 1.37
 3 -10 -3 4.43 1.35
 -3 10 3 6.1 1.69
 -3 10 3 6.59 1.76
 3 10 -3 7.8 1.79
 2 -10 -3 2.68 1.18
 -2 -10 3 5.72 1.24
 2 -10 -3 0.08 0.99
 -2 10 3 3.59 1.33
 2 10 -3 1.61 1.01
 -2 10 3 3.13 1.36
 2 10 -3 3.83 1.21
 1 -10 -3 18.01 3.14
 1 -10 -3 15.75 2.63
 1 -10 -3 17.85 2.71
 -1 -10 3 16.72 1.79
 -1 10 3 20.87 2.99
 1 10 -3 15.86 2.41
 1 10 -3 21.57 2.81
 0 -10 3 19.26 1.51
 0 -10 -3 17.35 1.98
 0 -10 -3 12.8 2.56
 0 -10 -3 16.9 2.58
 0 10 3 24.59 3.29
 0 10 -3 20.66 2.74
 0 10 -3 24.32 3.11
 -1 -10 -3 1.23 0.74
 -1 -10 -3 0.64 1.01
 1 10 3 1.21 1.01
 -1 10 -3 -0.2 0.68
 -2 -10 -3 6.79 1.5
 2 10 3 10.17 2.23
 -2 10 -3 10.82 1.86
 -10 0 4 15.86 3.09
 -10 0 4 22.84 2.85
 -9 0 4 0.35 0.57
 9 0 -4 0.28 0.43
 -9 0 4 0 0.79
 8 0 -4 3.35 0.73
 -8 0 4 6.41 1.35
 -8 0 4 4.23 0.88
 -8 0 4 6.43 1.79
 8 0 -4 3.61 1.06
 7 0 -4 42.9 3.7
 -7 0 4 34.87 2.56
 -7 0 4 42.38 2.34
 -7 0 4 35.81 3.3
 7 0 -4 40.94 2.2
 7 0 -4 45.37 2.96
 -6 0 4 12.63 1.43
 6 0 -4 13.83 1.18
 6 0 -4 13.06 1.73
 -6 0 4 14.97 1.8
 -6 0 4 15.41 2.4
 6 0 -4 8.49 1.85
 -5 0 4 25.3 2.25
 5 0 -4 25.58 1.88
 5 0 -4 25.19 1.56
 -5 0 4 24.39 1.59
 -5 0 4 25.2 1.82
 5 0 -4 25.22 2.35
 4 0 -4 8.6 0.54
 -4 0 4 8.89 1.4
 -4 0 4 9.93 1.13
 4 0 -4 9.19 1.04
 4 0 -4 7.39 1.09
 -4 0 4 8.36 1.14
 4 0 -4 9.58 1.54
 -3 0 4 -0.14 0.35
 3 0 -4 0.21 0.43
 -3 0 4 -0.34 0.23
 3 0 -4 -0.12 0.25
 3 0 -4 -0.05 0.17
 -3 0 4 0.01 0.24
 3 0 -4 0.03 0.27
 -2 0 4 19.74 1.22
 2 0 -4 19.8 1.11
 2 0 -4 19.98 1.37
 -2 0 4 19.69 1.08
 -2 0 4 22.45 1.37
 2 0 -4 19.63 1.19
 2 0 -4 20.76 1.34
 1 0 -4 189.04 5.78
 -1 0 4 186.2 5.72
 -1 0 4 188.29 5.68
 1 0 -4 182.28 5.64
 1 0 -4 189.94 5.82
 -1 0 4 187.37 5.86
 0 0 -4 22.77 1.15
 0 0 -4 21.5 1.36
 0 0 4 22.32 1.15
 0 0 -4 21.38 1.34
 0 0 4 20.35 1.29
 1 0 4 106.14 3.86
 -1 0 -4 103.28 3.91
 1 0 4 103.8 3.35
 -1 0 -4 107.86 3.41
 2 0 4 19.71 1.41
 -2 0 -4 20.08 1.03
 2 0 4 20.21 0.98
 -2 0 -4 18.21 1.41
 3 0 4 1.56 0.54
 -3 0 -4 1.7 0.62
 3 0 4 0.36 0.2
 -3 0 -4 0.72 0.55
 4 0 4 3.08 0.47
 4 0 4 3.72 0.4
 -4 0 -4 5.06 1
 -4 0 -4 4.38 1.14
 5 0 4 19.87 0.92
 -5 0 -4 20.19 2.55
 -5 0 -4 19.92 1.76
 5 0 4 19.94 0.8
 -5 0 -4 20.89 2.97
 -6 0 -4 5.58 1.52
 -6 0 -4 4.4 1.78
 -6 0 -4 5.74 1.19
 -7 0 -4 0.03 1.11
 -7 0 -4 1.56 0.78
 -7 0 -4 1.02 1.04
 -10 -1 4 20.46 3.54
 -10 -1 4 21.32 2.81
 -10 1 4 18.69 2.44
 -10 1 4 16.5 3.17
 9 -1 -4 18.41 1.47
 -9 -1 4 16.37 3.04
 9 -1 -4 15.16 2.13
 -9 -1 4 17.91 2.46
 -9 1 4 19.98 2.44
 9 1 -4 15.63 1.69
 -9 1 4 18.76 3.21
 8 -1 -4 2.54 0.68
 -8 -1 4 2.26 0.73
 -8 -1 4 0.53 0.59
 8 -1 -4 2.99 1.02
 -8 -1 4 -0.17 0.71
 -8 1 4 2.51 0.89
 8 1 -4 3.02 0.78
 8 1 -4 2.08 0.89
 -8 1 4 2.26 0.72
 -8 1 4 4.05 1.45
 -7 -1 4 14.81 1.67
 -7 -1 4 17.65 2.2
 7 -1 -4 15.9 2.69
 7 -1 -4 15.57 1.27
 7 -1 -4 14.21 1.83
 -7 -1 4 12.36 2.32
 7 1 -4 14.91 2.06
 -7 1 4 16.62 2.66
 7 1 -4 16.57 2.72
 -7 1 4 15.13 1.31
 7 1 -4 16.27 1.39
 -7 1 4 15.95 1.92
 -6 -1 4 2.3 1.05
 -6 -1 4 2.09 0.77
 6 -1 -4 2.09 0.57
 -6 -1 4 2.86 0.72
 6 -1 -4 4.58 1.03
 6 -1 -4 1.91 1.03
 -6 1 4 1.89 0.95
 -6 1 4 3.88 0.94
 6 1 -4 4.31 1.06
 -6 1 4 3.5 0.73
 6 1 -4 3.2 0.76
 6 1 -4 1.67 0.85
 -5 -1 4 28.43 2.43
 5 -1 -4 31.5 1.73
 5 -1 -4 29.46 1.96
 5 -1 -4 31.07 2.58
 -5 -1 4 31.92 1.91
 -5 -1 4 31.79 2.16
 -5 1 4 34.19 1.99
 5 1 -4 29.13 2.15
 -5 1 4 29.06 1.71
 -5 1 4 34.2 2.58
 5 1 -4 27.06 1.73
 5 1 -4 27.77 1.23
 5 1 -4 31.48 2.63
 4 -1 -4 16.62 1.18
 -4 -1 4 17.73 1.48
 -4 -1 4 17.03 1.3
 4 -1 -4 17.85 2.06
 4 -1 -4 16.78 1.33
 4 -1 -4 16.57 0.95
 -4 -1 4 18.54 1.7
 -4 1 4 16.95 1.97
 4 1 -4 19.04 1.34
 -4 1 4 17.11 0.81
 4 1 -4 17.17 2.07
 4 1 -4 15.16 1.66
 -4 1 4 17.34 1.29
 -4 1 4 18.12 1.24
 3 -1 -4 13.78 1.04
 3 -1 -4 17.61 1.5
 -3 -1 4 15.5 1.27
 -3 -1 4 15.54 1.17
 -3 -1 4 16.13 1.34
 3 -1 -4 13.05 0.9
 3 -1 -4 12.98 1.08
 -3 1 4 17.99 1.45
 3 1 -4 15.4 1.15
 -3 1 4 14.79 1.13
 3 1 -4 14.77 1.65
 -3 1 4 15.29 1.09
 -3 1 4 14.02 0.84
 3 1 -4 14.3 1.48
 2 -1 -4 25.17 1.4
 -2 -1 4 27.35 1.63
 2 -1 -4 27.3 1.46
 -2 -1 4 27.75 1.44
 -2 -1 4 29.34 1.56
 2 -1 -4 30.11 1.77
 2 -1 -4 25.48 1.49
 -2 1 4 26.33 1.36
 2 1 -4 28.28 1.59
 -2 1 4 31.14 1.8
 2 1 -4 27.73 1.53
 2 1 -4 29.41 1.72
 -2 1 4 29.56 1.5
 1 -1 -4 121.39 4.32
 1 -1 -4 121.42 4.02
 -1 -1 4 122.51 4.03
 -1 -1 4 122.43 3.82
 1 -1 -4 114.11 4.1
 -1 1 4 118.77 3.97
 -1 1 4 120.75 4.06
 1 1 -4 122.62 4.07
 1 1 -4 120.24 4.28
 1 1 -4 120.14 3.97
 1 1 -4 122.99 3.83
 -1 1 4 120.76 4.4
 0 -1 -4 694.78 18.19
 0 -1 -4 659.34 18.5
 0 -1 -4 677.15 18.7
 0 -1 4 642.64 18.01
 0 1 -4 696.25 18.77
 0 1 4 672.35 18.77
 0 1 4 740.61 19.21
 0 1 -4 697.89 19.15
 0 1 -4 683.22 18.68
 1 -1 4 77.62 2.69
 -1 -1 -4 82.43 2.93
 -1 -1 -4 76.43 3.26
 1 1 4 77.83 3.15
 -1 1 -4 76.11 3.15
 -1 1 -4 80.55 2.6
 1 1 4 77.1 2.75
 -2 -1 -4 7.06 1.06
 -2 -1 -4 7.45 0.85
 2 -1 4 7.8 0.59
 -2 1 -4 6.1 0.95
 2 1 4 6.57 0.7
 2 1 4 7.92 1.07
 -2 1 -4 7.11 0.5
 3 -1 4 47.54 1.66
 -3 -1 -4 49.94 2.66
 -3 -1 -4 43.71 2.87
 -3 -1 -4 47.21 1.97
 3 1 4 48.2 1.94
 3 1 4 50.96 2.58
 -3 1 -4 53.57 2.66
 4 -1 4 40.86 1.36
 -4 -1 -4 41.13 2.94
 -4 -1 -4 39.7 2.51
 4 1 4 39.26 1.86
 -4 1 -4 46.16 3.39
 -4 1 -4 40.48 2.42
 4 1 4 41.14 1.7
 -4 1 -4 42.74 2.87
 4 1 4 46.16 2.48
 -5 -1 -4 8.29 1.4
 -5 -1 -4 14.2 2.24
 -5 1 -4 14.69 1.74
 -5 1 -4 13.2 2.03
 5 1 4 12.77 0.95
 5 1 4 9.8 1.36
 5 1 4 11.57 0.78
 -5 1 -4 15.84 2.62
 -6 -1 -4 29.12 2.3
 -6 -1 -4 32.1 3.49
 -6 -1 -4 26.3 3.78
 -6 1 -4 38.23 4.29
 -6 1 -4 33.01 2.87
 -6 1 -4 35.34 2.41
 6 1 4 32.62 1.39
 -7 -1 -4 -0.31 1.03
 -7 -1 -4 0.47 0.56
 -7 -1 -4 0.7 0.85
 -7 1 -4 0.09 0.83
 -7 1 -4 0.82 0.62
 -7 1 -4 -0.47 0.84
 -10 -2 4 4.43 1.42
 -10 -2 4 5.13 1.83
 -10 2 4 6.25 1.43
 -10 2 4 4.98 2.08
 9 -2 -4 9.52 1.23
 -9 -2 4 8.09 1.7
 9 -2 -4 8.88 1.6
 -9 -2 4 8.58 2.35
 9 2 -4 9.91 1.45
 -9 2 4 8.93 1.56
 -9 2 4 7.17 1.99
 -8 -2 4 15.81 1.85
 -8 -2 4 13.22 2.06
 8 -2 -4 16.73 1.34
 8 -2 -4 13.21 1.81
 -8 -2 4 14.03 2.65
 8 2 -4 14.89 0.66
 8 2 -4 16.51 1.81
 -8 2 4 18.09 2.09
 -8 2 4 17.32 1.44
 -8 2 4 15.96 2.71
 7 -2 -4 35.48 2.02
 -7 -2 4 35.78 2.73
 7 -2 -4 38.74 3.43
 -7 -2 4 34.96 3.9
 7 -2 -4 38.42 2.49
 -7 -2 4 37.09 2.35
 -7 2 4 37.38 2.09
 -7 2 4 37.63 2.39
 -7 2 4 36.93 3.24
 7 2 -4 33.4 2.76
 7 2 -4 37.66 1.4
 7 2 -4 37.09 2.28
 6 -2 -4 3.31 0.83
 6 -2 -4 5.3 1.43
 6 -2 -4 4.27 0.77
 -6 -2 4 2.38 1.04
 -6 -2 4 3.02 0.92
 -6 -2 4 3.05 0.84
 -6 2 4 3.48 0.78
 6 2 -4 5.28 1.5
 6 2 -4 4.19 0.59
 6 2 -4 3.78 0.87
 -6 2 4 3.77 0.4
 -6 2 4 3.07 0.68
 -6 2 4 4.25 1.34
 6 2 -4 3.25 0.96
 5 -2 -4 0.55 0.58
 -5 -2 4 0.6 0.57
 -5 -2 4 0.97 0.57
 5 -2 -4 0.29 0.37
 5 -2 -4 -0.19 0.2
 5 -2 -4 0.01 0.28
 -5 -2 4 -0.57 0.25
 5 2 -4 0.14 0.28
 -5 2 4 0.43 0.22
 -5 2 4 0.03 0.28
 -5 2 4 0.49 0.38
 5 2 -4 0.16 0.47
 5 2 -4 0.7 0.68
 -5 2 4 0.35 0.55
 5 2 -4 -0.26 0.28
 4 -2 -4 29.72 2.28
 4 -2 -4 29.99 1.61
 -4 -2 4 32.64 2.11
 4 -2 -4 28.77 1.68
 -4 -2 4 29.24 1.87
 4 -2 -4 29.03 1.67
 -4 -2 4 31.53 2.29
 -4 2 4 31.15 1.43
 4 2 -4 27.26 2.24
 4 2 -4 33.12 1.92
 -4 2 4 31.45 1.68
 -4 2 4 31.34 2.27
 -4 2 4 29.64 1.67
 4 2 -4 30.04 2.11
 -3 -2 4 25.29 1.65
 -3 -2 4 27.1 1.78
 3 -2 -4 30.34 1.57
 3 -2 -4 26.65 1.94
 3 -2 -4 27.33 1.57
 3 -2 -4 27.83 1.58
 -3 -2 4 27.77 1.8
 3 2 -4 30.07 1.75
 3 2 -4 26.39 1.85
 3 2 -4 28.43 1.94
 -3 2 4 28.55 1.46
 -3 2 4 32.11 2.07
 -3 2 4 29.2 1.6
 2 -2 -4 15.59 1.15
 2 -2 -4 15.01 1.17
 2 -2 -4 15.87 1.36
 -2 -2 4 16.85 1.29
 -2 -2 4 17.13 1.05
 -2 -2 4 16.7 1.24
 -2 2 4 18.96 1.2
 -2 2 4 16.54 1.41
 2 2 -4 16.55 1.17
 2 2 -4 18.09 1.26
 -2 2 4 14.98 1.1
 2 2 -4 16.32 1.3
 -1 -2 4 63.99 2.72
 -1 -2 4 71.1 2.16
 1 -2 -4 72.1 3
 1 -2 -4 67.65 3.06
 1 -2 -4 66.38 2.77
 -1 2 4 71.57 3.24
 -1 2 4 68.34 2.84
 1 2 -4 70.75 2.76
 1 2 -4 71.02 2.96
 -1 2 4 69.7 2.74
 1 2 -4 68.36 2.29
 0 -2 4 -0.03 0.24
 0 -2 -4 0.21 0.28
 0 -2 -4 0.9 0.5
 0 -2 -4 0.83 0.46
 0 2 -4 0.52 0.21
 0 2 4 0.61 0.33
 0 2 -4 0.17 0.28
 0 2 4 0.23 0.34
 1 -2 4 3.65 0.58
 -1 -2 -4 3.26 0.65
 -1 -2 -4 4.01 0.84
 -1 -2 -4 3.78 0.91
 1 2 4 3.89 0.78
 1 2 4 4.27 0.69
 -1 2 -4 4.66 0.57
 -2 -2 -4 3.93 0.98
 -2 -2 -4 2.86 0.79
 2 -2 4 3.71 0.54
 -2 -2 -4 4.16 0.76
 -2 2 -4 5.44 1.07
 2 2 4 3.54 0.64
 -2 2 -4 4.57 0.86
 -2 2 -4 4.35 0.45
 2 2 4 3.37 0.79
 -3 -2 -4 0.03 0.38
 -3 -2 -4 1.74 0.78
 -3 -2 -4 0.43 0.35
 3 -2 4 0.45 0.25
 -3 2 -4 -0.04 0.38
 -3 2 -4 1.26 0.78
 3 2 4 0.6 0.32
 3 2 4 1.19 0.5
 3 2 4 0.99 0.44
 -4 -2 -4 58.04 3.65
 4 -2 4 55.9 1.83
 -4 -2 -4 55.17 3.13
 4 2 4 54.68 2.41
 -4 2 -4 51.81 3.61
 4 2 4 61.01 2.68
 4 2 4 62.21 3.05
 -4 2 -4 60.88 3.39
 -4 2 -4 58.35 3
 -5 -2 -4 16.15 2.07
 -5 -2 -4 14.81 2.23
 -5 2 -4 16.34 1.8
 5 2 4 16.93 1.86
 -5 2 -4 18.51 2.3
 5 2 4 12.01 1.32
 5 2 4 16.57 1.17
 -5 2 -4 12.61 2.33
 -6 -2 -4 4.47 1.15
 -6 -2 -4 3.95 1.42
 -6 2 -4 3.72 1.18
 -6 2 -4 5.29 1.55
 -6 2 -4 6.31 1.25
 6 2 4 4.02 0.69
 -7 -2 -4 3.53 1.14
 -7 -2 -4 -0.57 0.97
 -7 -2 -4 1.33 1.03
 -7 2 -4 3.89 1.6
 -7 2 -4 2.9 0.94
 -7 2 -4 0.61 0.74
 -10 -3 4 0.79 0.92
 -10 3 4 0.63 0.64
 9 -3 -4 25.87 2.18
 -9 -3 4 25.43 3.11
 -9 -3 4 24.06 3.73
 -9 3 4 27.16 3.7
 -9 3 4 27.25 2.17
 9 3 -4 27.53 2.15
 -8 -3 4 1.42 0.75
 8 -3 -4 3.43 0.83
 8 -3 -4 1.51 0.71
 -8 -3 4 1.96 1
 -8 -3 4 3.21 1.41
 8 3 -4 1.09 0.62
 -8 3 4 1.99 0.7
 -8 3 4 1.84 0.41
 8 3 -4 1.8 0.45
 -8 3 4 2.31 0.67
 -8 3 4 1.43 1.07
 -7 -3 4 20.41 1.81
 -7 -3 4 25.57 3.38
 7 -3 -4 22.74 1.63
 7 -3 -4 20.9 1.73
 -7 -3 4 28.06 2.99
 7 3 -4 22.44 1.89
 -7 3 4 25.21 1.32
 -7 3 4 25.06 1.77
 -7 3 4 21.25 1.58
 7 3 -4 25.23 1.44
 -7 3 4 26.61 3.21
 6 -3 -4 0.8 0.76
 6 -3 -4 0.54 0.41
 6 -3 -4 0.01 0.3
 -6 -3 4 0.13 0.35
 -6 -3 4 0.77 0.59
 -6 -3 4 0.65 0.67
 6 3 -4 -0.03 0.28
 6 3 -4 0.89 0.53
 -6 3 4 -0.01 0.27
 -6 3 4 0.01 0.23
 -6 3 4 -0.5 0.46
 6 3 -4 -0.06 0.41
 -6 3 4 -0.18 0.3
 5 -3 -4 28.02 2.51
 -5 -3 4 30.46 2.59
 -5 -3 4 31.11 2.07
 5 -3 -4 28.85 1.77
 5 -3 -4 27.97 1.78
 5 -3 -4 25.92 1.64
 -5 -3 4 28.05 2.22
 -5 3 4 30.92 1.78
 -5 3 4 37.04 2.72
 -5 3 4 31.12 1.7
 5 3 -4 26.57 2.26
 5 3 -4 28 1.86
 -5 3 4 31.53 1.66
 5 3 -4 31.87 2.09
 4 -3 -4 0.45 0.53
 4 -3 -4 0.23 0.32
 -4 -3 4 0.02 0.32
 4 -3 -4 1.16 0.48
 -4 -3 4 0.95 0.57
 4 -3 -4 -0.05 0.34
 -4 -3 4 0.1 0.46
 -4 3 4 0.89 0.56
 -4 3 4 0.65 0.38
 4 3 -4 0.94 0.53
 4 3 -4 0.22 0.44
 -4 3 4 0.55 0.31
 4 3 -4 1.49 0.58
 3 -3 -4 30.98 1.57
 -3 -3 4 30.9 2.01
 3 -3 -4 31.35 1.94
 3 -3 -4 31.63 1.84
 -3 -3 4 29.61 1.94
 3 -3 -4 31.39 2.18
 -3 -3 4 32.97 2
 -3 3 4 29.33 2.11
 -3 3 4 30.33 1.74
 3 3 -4 31.69 1.96
 3 3 -4 30.29 2.06
 -3 3 4 29.79 1.71
 2 -3 -4 33.34 1.96
 -2 -3 4 36.78 1.7
 -2 -3 4 38.37 2.11
 2 -3 -4 38.31 2.2
 -2 -3 4 37.75 2.1
 2 -3 -4 40.81 2.36
 -2 3 4 41.09 2.14
 2 3 -4 33.64 2.11
 -2 3 4 43.24 2.5
 -2 3 4 40.12 2.03
 2 3 -4 39.11 2.12
 1 -3 -4 20.71 1.65
 -1 -3 4 23.71 1.54
 -1 -3 4 23.2 1.53
 1 -3 -4 24.38 1.6
 1 -3 -4 25.23 1.83
 -1 3 4 26.19 1.95
 -1 3 4 24.54 1.54
 -1 3 4 24.1 1.65
 1 3 -4 25.25 1.56
 1 3 -4 23.72 1.59
 0 -3 -4 1.12 0.48
 0 -3 4 1.14 0.41
 0 -3 -4 1.48 0.65
 0 -3 -4 1.19 0.58
 0 3 -4 -0.13 0.27
 0 3 -4 1.25 0.42
 0 3 4 1.16 0.53
 0 3 4 0.67 0.37
 1 -3 4 21.83 1.35
 -1 -3 -4 18.97 1.65
 -1 -3 -4 21.29 1.53
 -1 -3 -4 22.84 1.8
 -1 -3 -4 19.96 1.76
 1 3 4 22.82 1.68
 -1 3 -4 21.28 1.22
 -1 3 -4 21.76 1.23
 1 3 4 21.84 1.47
 -2 -3 -4 15.08 1.82
 2 -3 4 16.3 1.11
 -2 -3 -4 14.36 1.87
 -2 -3 -4 17.3 1.4
 2 3 4 15.89 1.72
 2 3 4 17.27 1.43
 2 3 4 16.65 1.28
 -2 3 -4 16.13 0.92
 -2 3 -4 14.63 1.58
 -3 -3 -4 62.82 2.95
 3 -3 4 64.36 2.43
 -3 -3 -4 60.36 3.62
 -3 -3 -4 57.44 3.28
 3 3 4 68.43 3.14
 -3 3 -4 65.75 3.5
 -3 3 -4 63.57 1.99
 3 3 4 65.16 2.9
 -3 3 -4 65.73 2.13
 3 3 4 69.31 3.32
 4 -3 4 4.72 0.59
 -4 -3 -4 2.63 0.89
 -4 -3 -4 4.96 1.27
 -4 3 -4 4.01 0.93
 4 3 4 2.59 0.8
 4 3 4 4 0.87
 -4 3 -4 4.09 1.22
 -4 3 -4 2.6 0.85
 4 3 4 4.23 0.81
 -5 -3 -4 0.48 0.59
 -5 -3 -4 0.37 0.68
 -5 3 -4 -0.25 0.7
 -5 3 -4 0.83 0.59
 5 3 4 1.64 0.56
 5 3 4 1.39 0.57
 -5 3 -4 0.71 0.61
 -6 -3 -4 16.32 2.61
 -6 -3 -4 17.34 2.27
 -6 3 -4 15.77 2.2
 -6 3 -4 18.66 2.8
 -6 3 -4 20.07 1.8
 -7 -3 -4 6.05 1.49
 -7 3 -4 4.92 1.66
 -7 3 -4 6.01 1.31
 -7 3 -4 6.39 1.59
 -9 -4 4 6.17 1.6
 -9 -4 4 4.79 1.66
 -9 4 4 7.36 1.25
 -9 4 4 6.48 1.95
 9 4 -4 6.01 1.3
 -8 -4 4 6.59 1.61
 -8 -4 4 6.08 1.8
 8 -4 -4 6.26 1.11
 -8 -4 4 6.9 1.38
 8 -4 -4 6.45 1.04
 8 4 -4 6.35 0.95
 -8 4 4 5.93 0.92
 -8 4 4 5.62 0.98
 -8 4 4 6.69 1.74
 -8 4 4 7.22 1.09
 8 4 -4 6.35 1.31
 -7 -4 4 50.29 4.05
 -7 -4 4 43.16 3.25
 7 -4 -4 49.25 2.56
 -7 -4 4 52.68 3.12
 7 -4 -4 45.88 2.58
 -7 4 4 54.69 2.69
 7 4 -4 57.14 3.24
 -7 4 4 51.34 2.55
 7 4 -4 52.62 2.68
 -7 4 4 53.47 3.96
 -7 4 4 56.51 2.6
 6 -4 -4 13.79 2.26
 -6 -4 4 16.34 2.51
 -6 -4 4 20.23 2.44
 6 -4 -4 17.04 1.73
 6 -4 -4 15.67 1.27
 -6 -4 4 19.18 2.12
 6 4 -4 18.84 2.43
 -6 4 4 18.78 1.26
 -6 4 4 16.69 1.35
 -6 4 4 15.78 1.36
 6 4 -4 21.54 2.23
 6 4 -4 16.16 1.76
 -6 4 4 19.67 2.7
 5 -4 -4 38.15 2.2
 5 -4 -4 34.62 2.28
 -5 -4 4 32.75 2.78
 -5 -4 4 37.74 2.65
 5 -4 -4 29.16 2.61
 5 -4 -4 36.66 1.84
 -5 -4 4 36.06 2.4
 -5 4 4 38.34 2.15
 5 4 -4 35.16 2.38
 5 4 -4 36.92 2.74
 -5 4 4 38.14 2.09
 -5 4 4 36.44 2.79
 5 4 -4 35.08 2.36
 4 -4 -4 9.26 0.81
 4 -4 -4 7.38 1.23
 -4 -4 4 9.73 1.47
 -4 -4 4 7.73 1.26
 -4 -4 4 11.13 1.65
 4 -4 -4 9.08 1.22
 4 -4 -4 10.5 1.67
 -4 4 4 8.59 1.48
 4 4 -4 9.48 1.36
 -4 4 4 9.49 1.16
 -4 4 4 8.96 1.24
 4 4 -4 7.73 1.32
 4 4 -4 10.58 1.61
 3 -4 -4 2.86 0.74
 3 -4 -4 3.98 0.61
 -3 -4 4 4.59 0.92
 -3 -4 4 3.29 0.82
 -3 -4 4 3.79 0.9
 3 -4 -4 4.17 0.95
 3 -4 -4 4.66 1.06
 3 4 -4 3.87 1.04
 -3 4 4 3.48 0.73
 -3 4 4 4.45 1.06
 3 4 -4 2.49 0.78
 3 4 -4 6.18 1.08
 -3 4 4 3.68 0.88
 -2 -4 4 16.9 1.42
 2 -4 -4 16.78 1.89
 2 -4 -4 18.04 1.63
 2 -4 -4 17.11 1.46
 -2 -4 4 22.62 1.66
 -2 -4 4 16.28 1.17
 2 4 -4 18.44 1.56
 -2 4 4 21.01 1.65
 -2 4 4 19.09 1.45
 2 4 -4 22.5 1.67
 -2 4 4 18.68 2.11
 1 -4 -4 8.75 1.39
 1 -4 -4 7.91 1.2
 1 -4 -4 11.02 1.56
 -1 -4 4 10.64 1.22
 -1 -4 4 10.58 1.34
 -1 4 4 9.4 1.31
 -1 4 4 9.09 1.2
 1 4 -4 11.26 1.34
 -1 4 4 10.46 1.61
 1 4 -4 10.54 1.31
 0 -4 4 36.45 2.05
 0 -4 -4 34.48 2.15
 0 -4 -4 33.45 2.34
 0 -4 -4 35.38 2.39
 0 -4 -4 33.91 2.15
 0 4 -4 33.54 1.98
 0 4 -4 36.28 2.01
 0 4 4 37.75 2.34
 0 4 4 37.26 2.14
 -1 -4 -4 7.62 1.36
 -1 -4 -4 6.36 1.23
 1 -4 4 5.33 0.87
 -1 -4 -4 7.78 1.23
 -1 -4 -4 4.98 1.05
 -1 4 -4 7.47 1.04
 -1 4 -4 6.17 0.87
 1 4 4 7.13 1.08
 -1 4 -4 5.7 0.48
 1 4 4 8.96 1.31
 1 4 4 2.32 0.73
 2 -4 4 24.75 1.53
 -2 -4 -4 21.08 1.75
 -2 -4 -4 19.07 2.21
 -2 -4 -4 22.74 2.42
 2 4 4 23.08 1.83
 2 4 4 23.14 1.89
 2 4 4 23.26 1.7
 -2 4 -4 24.38 1.36
 -2 4 -4 22.11 1.48
 -2 4 -4 23.72 1.51
 -3 -4 -4 38.23 2.69
 -3 -4 -4 33.96 2.28
 -3 -4 -4 33.18 2.67
 3 -4 4 34.84 1.84
 -3 4 -4 39.42 2.47
 -3 4 -4 43.27 1.65
 3 4 4 43.71 2.59
 3 4 4 36.38 2.47
 -3 4 -4 38.09 1.74
 3 4 4 37.85 2.3
 -4 -4 -4 0.34 0.64
 4 -4 4 -0.08 0.28
 -4 -4 -4 0.78 0.67
 4 4 4 0.21 0.44
 -4 4 -4 1.27 0.78
 4 4 4 0.1 0.45
 4 4 4 1.04 0.7
 -5 -4 -4 1.48 0.9
 -5 -4 -4 1.55 0.94
 5 4 4 1.41 0.67
 -5 4 -4 1.47 0.72
 -5 4 -4 2.14 1.02
 -5 4 -4 1.23 0.71
 -6 -4 -4 5.62 1.62
 -6 -4 -4 5.33 1.44
 -6 4 -4 6.11 1.58
 -6 4 -4 4.67 1.32
 -6 4 -4 6.94 1.4
 -9 -5 4 0.19 1.09
 -9 -5 4 0.03 0.74
 -9 5 4 0.08 0.9
 9 5 -4 0.45 0.67
 -8 -5 4 2.23 1.03
 8 -5 -4 3.71 0.95
 -8 -5 4 3.48 1.05
 -8 -5 4 2 1.36
 -8 5 4 3.74 0.76
 8 5 -4 4.79 0.99
 -8 5 4 3.04 1.33
 8 5 -4 4.17 1.22
 7 -5 -4 5.98 0.9
 -7 -5 4 7.96 1.45
 7 -5 -4 6.97 1.21
 -7 -5 4 6.73 1.57
 -7 -5 4 3.14 1.4
 7 5 -4 5.48 1.14
 -7 5 4 4.36 1.47
 -7 5 4 6.33 1.17
 -7 5 4 6.01 1.02
 -7 5 4 6.04 0.81
 7 5 -4 8.82 1.57
 -6 -5 4 10.75 2.08
 6 -5 -4 11.97 1.56
 -6 -5 4 14.42 2.09
 -6 -5 4 11.98 1.79
 6 -5 -4 13.02 1.04
 6 5 -4 15.9 2.05
 6 5 -4 11.48 1.69
 -6 5 4 14.83 1.77
 -6 5 4 14.09 2.25
 -6 5 4 13.13 1.49
 -5 -5 4 23.36 2.81
 5 -5 -4 24.22 2.14
 5 -5 -4 27.78 1.45
 5 -5 -4 26.83 1.99
 -5 -5 4 27.49 2.34
 5 -5 -4 30.69 2.66
 -5 -5 4 28.66 2.24
 5 5 -4 27.42 2.47
 5 5 -4 29.86 2.31
 5 5 -4 28.62 2.3
 -5 5 4 31.35 2.64
 -5 5 4 31.7 2.21
 -5 5 4 30.15 1.93
 4 -5 -4 11.63 0.86
 4 -5 -4 9.86 1.68
 4 -5 -4 14.06 1.68
 -4 -5 4 12.77 1.86
 -4 -5 4 13.94 1.84
 4 -5 -4 14.35 1.9
 -4 -5 4 15.29 1.91
 -4 5 4 16.11 1.89
 -4 5 4 13.31 1.98
 -4 5 4 15.51 1.64
 4 5 -4 14.84 1.89
 4 5 -4 15.82 2.15
 4 5 -4 13.72 1.91
 -3 -5 4 22.28 1.87
 -3 -5 4 24.15 1.86
 -3 -5 4 22.55 1.86
 3 -5 -4 23.18 2.05
 3 -5 -4 22.14 1.8
 3 -5 -4 25.73 2.13
 -3 5 4 24.06 1.75
 3 5 -4 24.96 2.76
 3 5 -4 27.07 2.14
 3 5 -4 24.5 1.97
 -3 5 4 23.12 1.92
 -3 5 4 26.5 2.22
 -2 -5 4 13.21 1.66
 2 -5 -4 13.51 1.68
 -2 -5 4 12.9 1.5
 2 -5 -4 15.77 1.94
 2 -5 -4 13.95 1.9
 -2 -5 4 13.75 1.15
 -2 5 4 13.53 1.57
 -2 5 4 16.72 2.11
 -2 5 4 17.48 1.98
 2 5 -4 11.48 1.52
 2 5 -4 12.63 1.63
 1 -5 -4 14.47 1.75
 -1 -5 4 15.37 1.32
 1 -5 -4 15.53 1.91
 -1 -5 4 15.93 1.73
 1 -5 -4 17.45 1.4
 -1 -5 4 15.58 0.74
 1 -5 -4 14.9 2.03
 -1 5 4 19.54 1.61
 -1 5 4 16.47 1.97
 -1 5 4 20.44 2.36
 1 5 -4 19.85 1.6
 1 5 -4 16.64 1.77
 -1 5 4 17.52 2.03
 0 -5 -4 4.78 1.03
 0 -5 4 7.39 1.16
 0 -5 -4 5.16 1.13
 0 -5 -4 4.54 1.16
 0 -5 -4 7.36 1.23
 0 5 4 5.08 1.03
 0 5 4 8.8 1.44
 0 5 -4 6.09 1.02
 0 5 -4 7.64 1.13
 0 5 4 9.99 1.61
 -1 -5 -4 3.88 1.15
 -1 -5 -4 3.71 1.04
 -1 -5 -4 6.21 1.28
 1 -5 4 4.18 0.9
 -1 -5 -4 4.95 1.12
 -1 5 -4 3.09 0.75
 1 5 4 3.98 1.08
 1 5 4 5.71 1.17
 -1 5 -4 3.58 0.91
 1 5 4 4.14 0.94
 -1 5 -4 4.67 0.9
 -1 5 -4 4.74 0.53
 -2 -5 -4 42.63 2.67
 2 -5 4 37.73 2.17
 -2 -5 -4 32.83 2.65
 -2 -5 -4 33.91 2.68
 -2 -5 -4 39.87 2.79
 2 5 4 39.85 2.65
 2 5 4 42.81 2.78
 -2 5 -4 42.88 2.34
 -2 5 -4 42.54 2.11
 -2 5 -4 38.23 2.14
 2 5 4 39.62 2.51
 -2 5 -4 37.07 1.85
 3 -5 4 17.89 1.44
 -3 -5 -4 18.74 2.41
 -3 -5 -4 17.41 2.36
 -3 -5 -4 21.64 2.31
 -3 5 -4 21.49 1.63
 3 5 4 23.5 2.82
 3 5 4 17.68 2.09
 3 5 4 21.41 2.36
 -3 5 -4 19.79 1.25
 -3 5 -4 20.97 1.39
 -4 -5 -4 2.59 1.16
 4 -5 4 2.62 0.64
 -4 -5 -4 3.47 1.17
 4 5 4 3.72 1.09
 -4 5 -4 3.25 0.46
 -4 5 -4 3.17 0.47
 -4 5 -4 3.21 0.95
 -5 -5 -4 2.15 1.01
 -5 -5 -4 1.27 0.93
 -5 5 -4 4.28 1.08
 5 5 4 2.01 0.88
 -5 5 -4 1.31 0.87
 -6 -5 -4 10.13 1.99
 -6 -5 -4 10.7 2.25
 -6 5 -4 11.94 2.03
 -6 5 -4 11.05 1.76
 -6 5 -4 11.29 1.77
 -8 -6 4 2.3 0.93
 -8 -6 4 1.65 1.03
 -8 -6 4 0.79 1.11
 -8 6 4 2.03 0.89
 -8 6 4 2.16 1.17
 8 6 -4 2.85 1.01
 -7 -6 4 15.91 2.16
 -7 -6 4 8.54 1.99
 -7 -6 4 14.1 2.2
 7 -6 -4 16.19 1.92
 -7 6 4 15.99 1.99
 -7 6 4 17.54 2.71
 7 6 -4 16.73 2.07
 7 6 -4 16.77 2.26
 -7 6 4 17.68 1.82
 -6 -6 4 38.46 2.88
 6 -6 -4 46.59 1.78
 -6 -6 4 46.56 3.3
 6 -6 -4 40.09 2.68
 -6 -6 4 42.82 3.63
 6 6 -4 48.84 3.24
 -6 6 4 52.66 3.75
 -6 6 4 51.28 3.14
 6 6 -4 50.52 3.33
 -6 6 4 47.83 2.66
 -5 -6 4 25.32 2.73
 -5 -6 4 19.83 2.66
 5 -6 -4 20.81 2.24
 -5 -6 4 22.77 2.49
 5 -6 -4 20.76 1.09
 5 -6 -4 22.14 2.74
 -5 6 4 25.35 2.18
 5 6 -4 26.63 2.33
 5 6 -4 25.72 2.81
 -5 6 4 22.95 2.79
 -5 6 4 27.23 1.92
 4 -6 -4 17.5 2.41
 4 -6 -4 16.19 0.97
 -4 -6 4 20.08 2.28
 -4 -6 4 20.09 2.24
 -4 -6 4 15.27 2.1
 4 -6 -4 15.58 1.89
 4 -6 -4 17.84 2.33
 4 6 -4 19.99 2.4
 4 6 -4 20.67 2.63
 -4 6 4 16.64 1.79
 -4 6 4 16.04 2.06
 4 6 -4 20.91 2.37
 -4 6 4 21.27 2.59
 -3 -6 4 1.57 0.7
 3 -6 -4 3.27 0.62
 3 -6 -4 2.43 0.94
 3 -6 -4 4.36 1.27
 -3 -6 4 2.72 0.88
 3 -6 -4 2.66 0.87
 -3 6 4 1.43 0.73
 -3 6 4 3.34 1.07
 -3 6 4 2.97 0.84
 -3 6 4 2.03 0.91
 3 6 -4 2.34 0.87
 3 6 -4 1.19 0.81
 3 6 -4 4.37 1.14
 2 -6 -4 6.81 1.28
 2 -6 -4 4.66 1.27
 -2 -6 4 4.71 1.09
 -2 -6 4 6.55 1.12
 2 -6 -4 6.48 0.94
 -2 -6 4 5.58 0.78
 2 -6 -4 7.32 1.44
 2 6 -4 7.22 1.72
 2 6 -4 5.72 1.19
 -2 6 4 6.25 1.36
 2 6 -4 9.05 1.47
 -2 6 4 8.36 1.33
 -2 6 4 4.26 1.03
 -2 6 4 7.65 1.59
 -1 -6 4 11.49 1.6
 -1 -6 4 10.01 1.32
 1 -6 -4 10.58 1.65
 1 -6 -4 10.31 1.33
 1 -6 -4 12.49 1.81
 1 -6 -4 9.62 1.78
 -1 -6 4 10.63 0.74
 1 6 -4 14.54 1.81
 -1 6 4 12.53 1.67
 1 6 -4 10.48 1.46
 -1 6 4 11.64 1.8
 -1 6 4 11.82 1.81
 -1 6 4 7.5 1.58
 0 -6 -4 4.93 1.15
 0 -6 -4 6.89 1.44
 0 -6 -4 6.15 1.18
 0 -6 4 4.17 1.01
 0 -6 4 5.29 0.62
 0 -6 -4 6.74 1.49
 0 6 4 5.68 1.17
 0 6 -4 6.66 1.3
 0 6 -4 5.34 0.98
 0 6 4 7.23 1.43
 0 6 4 5.37 1.26
 0 6 -4 6.39 1.15
 -1 -6 -4 14.21 2.13
 -1 -6 -4 14.55 1.95
 1 -6 4 15.76 1.8
 -1 -6 -4 10.95 1.81
 1 -6 4 12.51 0.99
 -1 -6 -4 10.75 1.65
 -1 6 -4 14.92 1.55
 1 6 4 17.83 2.01
 -1 6 -4 12.96 1.71
 1 6 4 11.75 1.8
 1 6 4 14.39 2
 -1 6 -4 12.34 0.86
 -1 6 -4 17.42 1.87
 2 -6 4 16.14 1.76
 -2 -6 -4 20.88 2.72
 -2 -6 -4 19.49 2.28
 2 -6 4 19.2 1.49
 -2 -6 -4 20.68 2.43
 -2 6 -4 20.26 1.54
 2 6 4 19.13 2.33
 -2 6 -4 21.51 1.62
 -2 6 -4 21.14 1.31
 -2 6 -4 20.79 1.73
 -3 -6 -4 30.22 2.65
 3 -6 4 29.58 1.99
 -3 -6 -4 23.38 2.89
 3 6 4 34.1 2.67
 -3 6 -4 35.52 2.06
 -3 6 -4 31.83 1.95
 -3 6 -4 33.66 1.92
 -3 6 -4 31.47 1.96
 -4 -6 -4 9.74 1.92
 -4 -6 -4 14.76 2.39
 4 -6 4 12.16 1.38
 -4 6 -4 14.83 1.77
 -4 6 -4 10.07 1.28
 -4 6 -4 11.98 0.97
 4 6 4 14.02 2.07
 -5 -6 -4 7.03 1.76
 -5 -6 -4 6.11 1.68
 -5 6 -4 5.4 0.43
 -5 6 -4 4.09 1.12
 -5 6 -4 5 1.15
 -8 -7 4 -0.89 0.76
 -8 7 4 -0.61 0.71
 -8 7 4 0.13 0.6
 8 7 -4 0.89 0.87
 7 -7 -4 5.97 1.29
 -7 -7 4 6 1.92
 -7 -7 4 7.12 1.74
 7 7 -4 6.24 1.4
 7 7 -4 5.52 1.38
 -7 7 4 8.11 1.88
 -7 7 4 7.21 1.44
 -7 7 4 6.51 1.43
 -6 -7 4 10.21 1.83
 6 -7 -4 8.92 1.59
 -6 -7 4 6.11 1.78
 -6 7 4 12.02 2.16
 -6 7 4 10.54 1.9
 -6 7 4 10.39 1.47
 6 7 -4 10.29 1.85
 6 7 -4 14.61 2.17
 -6 7 4 11.04 1.85
 5 -7 -4 6.79 1.37
 -5 -7 4 6.83 1.45
 -5 -7 4 3.64 1.2
 5 -7 -4 5.01 1.45
 -5 -7 4 8.33 1.72
 -5 7 4 5.22 1.35
 -5 7 4 10.28 1.77
 -5 7 4 9.41 1.45
 -5 7 4 7.51 1.68
 5 7 -4 8.75 1.77
 5 7 -4 5.78 1.44
 -4 -7 4 14.76 2.36
 -4 -7 4 27.1 2.78
 4 -7 -4 28.89 3.34
 4 -7 -4 23.45 1.18
 4 -7 -4 21.75 2.4
 4 -7 -4 23.59 1.11
 -4 7 4 26.09 2.81
 -4 7 4 26.62 2.08
 4 7 -4 28.35 3.33
 4 7 -4 28.22 2.44
 -4 7 4 27.85 3.12
 4 7 -4 21.87 2.66
 -4 7 4 27.4 2.46
 3 -7 -4 30.24 1.64
 -3 -7 4 32.23 2.38
 3 -7 -4 30.15 3.34
 -3 -7 4 36.08 3.04
 3 -7 -4 26.84 2.31
 -3 7 4 35.59 2.76
 3 7 -4 34.81 2.68
 -3 7 4 34.79 2.89
 3 7 -4 26.22 3.2
 3 7 -4 30.29 2.5
 -3 7 4 34.57 2.77
 -3 7 4 36.95 2.48
 2 -7 -4 0.8 0.68
 -2 -7 4 0.45 0.48
 2 -7 -4 -0.06 0.67
 -2 -7 4 -0.06 0.29
 2 -7 -4 0.88 0.46
 2 -7 -4 0.55 0.65
 -2 7 4 1.06 0.77
 -2 7 4 0.32 0.65
 2 7 -4 0.47 0.57
 -2 7 4 -0.2 0.46
 2 7 -4 1.37 0.69
 -2 7 4 0.95 0.65
 2 7 -4 -0.01 0.7
 1 -7 -4 2.35 1.13
 1 -7 -4 2.99 1.01
 -1 -7 4 4.05 0.9
 1 -7 -4 3.09 1.09
 1 -7 -4 3.6 0.88
 -1 -7 4 3.68 0.61
 -1 7 4 4.36 1.24
 -1 7 4 3.92 1.03
 1 7 -4 5.51 1.18
 1 7 -4 5.07 1.16
 1 7 -4 2.49 1.06
 -1 7 4 4.25 1.21
 -1 7 4 2.73 1.1
 1 7 -4 3.56 1.59
 0 -7 -4 0.91 0.64
 0 -7 -4 1.6 0.96
 0 -7 4 2.58 0.54
 0 -7 -4 1.29 0.78
 0 7 -4 2.18 0.79
 0 7 -4 1.67 0.83
 0 7 -4 3.29 0.87
 0 7 4 1.37 0.79
 -1 -7 -4 8.05 1.52
 -1 -7 -4 6.96 1.49
 -1 -7 -4 4.77 1.44
 1 -7 4 5.72 0.86
 -1 7 -4 7.4 1.34
 1 7 4 6.97 1.57
 -1 7 -4 7.64 1.48
 -1 7 -4 7.72 1.19
 -2 -7 -4 2.17 0.93
 -2 -7 -4 1.37 0.84
 2 -7 4 1.16 0.59
 -2 -7 -4 2.91 1.18
 -2 7 -4 3.37 0.9
 2 7 4 2.84 1.22
 -2 7 -4 3.16 0.94
 -2 7 -4 3.01 0.79
 -2 7 -4 2.01 0.56
 -3 -7 -4 4.93 1.49
 -3 -7 -4 3.61 1.25
 3 -7 4 2.98 0.84
 -3 7 -4 4.5 0.85
 -3 7 -4 4.33 0.89
 -3 7 -4 3.62 0.85
 3 7 4 3.31 1.21
 -4 -7 -4 10.52 2.01
 -4 -7 -4 10.14 2.09
 -4 7 -4 15.79 1.3
 4 7 4 13.84 2.2
 -4 7 -4 12.85 1.58
 -5 -7 -4 0.06 0.86
 -5 -7 -4 0.74 0.87
 -5 7 -4 1.51 0.44
 -7 -8 4 0.27 0.8
 7 -8 -4 1.52 0.81
 -7 -8 4 1.67 1.27
 -7 8 4 3.02 1.39
 7 8 -4 2.04 1.09
 -7 8 4 3.11 1.17
 -6 -8 4 2.74 1.26
 6 -8 -4 2.63 1.02
 -6 -8 4 4.74 1.31
 -6 8 4 2.95 1.24
 -6 8 4 4.48 1.06
 6 8 -4 2.76 1.16
 -6 8 4 3.19 1.15
 -5 -8 4 13.37 2.1
 5 -8 -4 13.87 2.1
 -5 8 4 15.79 2.44
 -5 8 4 14.68 1.93
 5 8 -4 15.92 2.3
 -5 8 4 12.34 2.02
 4 -8 -4 33.2 2.69
 4 -8 -4 29.07 3.52
 -4 -8 4 38.45 2.81
 4 -8 -4 29.68 1.28
 -4 8 4 32.85 2.47
 -4 8 4 37.07 3.15
 -4 8 4 34.18 2.87
 4 8 -4 32.5 2.79
 3 -8 -4 5.81 1.57
 -3 -8 4 4.44 0.93
 -3 -8 4 4.77 1.16
 3 -8 -4 6.19 1.48
 3 -8 -4 7.03 0.89
 -3 8 4 6.48 1.51
 3 8 -4 4.65 1.29
 3 8 -4 6.04 1.43
 -3 8 4 7.65 1.79
 -3 8 4 4.67 1.19
 2 -8 -4 12.72 2.04
 -2 -8 4 13.25 1.2
 2 -8 -4 14.52 1.29
 2 -8 -4 11.62 2.21
 -2 -8 4 14.75 1.77
 2 8 -4 17.7 2.18
 2 8 -4 14.71 2.32
 -2 8 4 12.75 2.25
 -2 8 4 16.7 2.44
 2 8 -4 18.6 2.46
 1 -8 -4 4.48 0.99
 -1 -8 4 3.23 0.81
 1 -8 -4 1.81 1.1
 1 -8 -4 2.46 0.98
 -1 -8 4 3.96 0.72
 -1 8 4 3.18 1.2
 1 8 -4 1.85 0.84
 1 8 -4 4.45 1.06
 1 8 -4 2.93 1.22
 0 -8 4 31.66 1.73
 0 -8 -4 25.58 2.15
 0 -8 -4 30.87 3.61
 0 -8 -4 29.14 3.15
 0 8 -4 34.25 2.36
 0 8 -4 34.47 2.85
 0 8 4 31.3 3.38
 0 8 -4 31.95 2.54
 -1 -8 -4 4.28 1.52
 -1 -8 -4 2.61 0.93
 1 -8 4 4.46 0.84
 -1 -8 -4 6.89 1.57
 -1 8 -4 5.75 1.12
 -1 8 -4 5.09 1.25
 1 8 4 4.45 1.37
 -1 8 -4 6.31 1.3
 -2 -8 -4 1.54 0.98
 -2 -8 -4 1.21 0.83
 -2 -8 -4 1.36 0.85
 2 8 4 2.21 1.1
 -2 8 -4 1.96 0.72
 -2 8 -4 2.3 0.61
 -2 8 -4 2.44 0.83
 -3 -8 -4 0.22 0.92
 -3 -8 -4 2.25 1.14
 -3 8 -4 2.22 0.8
 3 8 4 1.22 0.96
 -4 -8 -4 4.63 1.47
 -4 -8 -4 3.67 1.46
 -4 8 -4 6.34 1.11
 4 8 4 4.29 1.45
 -6 -9 4 2.68 1.51
 -6 -9 4 2.87 1.13
 6 -9 -4 4.47 1.31
 6 9 -4 6.41 1.6
 -6 9 4 2.82 1.36
 5 -9 -4 4.23 1.32
 -5 -9 4 5.09 1.35
 -5 9 4 9.02 2
 5 9 -4 6.19 1.65
 -5 9 4 8.12 1.78
 -5 9 4 7.03 1.48
 4 -9 -4 0.1 0.83
 -4 -9 4 1.65 0.77
 -4 -9 4 1.98 0.93
 4 -9 -4 0.93 0.86
 4 9 -4 0.95 0.9
 -4 9 4 3.1 1.32
 -4 9 4 0.84 0.79
 3 -9 -4 4.03 1.61
 -3 -9 4 3.02 0.86
 3 -9 -4 4.41 1.4
 -3 -9 4 5.75 1.21
 -3 9 4 5.29 1.51
 -3 9 4 7.01 1.88
 3 9 -4 6.36 1.51
 2 -9 -4 1.13 0.57
 2 -9 -4 2.02 1.27
 -2 -9 4 0.95 0.59
 -2 -9 4 1.34 0.74
 2 -9 -4 2.6 1.11
 -2 9 4 1.48 0.98
 2 9 -4 1.64 0.91
 -2 9 4 1.13 1.03
 2 9 -4 0.47 0.71
 -1 -9 4 3.65 0.88
 1 -9 -4 3.43 1.44
 1 -9 -4 2.79 0.88
 1 -9 -4 5.36 1.45
 -1 9 4 4.46 1.44
 1 9 -4 4.83 1.21
 1 9 -4 5.04 1.39
 1 9 -4 4.98 1.34
 0 -9 -4 7.06 1.98
 0 -9 -4 9.67 1.95
 0 -9 -4 4 1.03
 0 9 -4 7.19 1.36
 0 9 4 5.35 1.5
 0 9 -4 7.57 1.61
 0 9 -4 6.41 1.55
 -1 -9 -4 0.93 0.8
 -1 -9 -4 1.33 1.08
 -1 -9 -4 0.74 0.77
 1 9 4 0.83 0.9
 -1 9 -4 0.37 0.63
 -2 -9 -4 4.75 1.31
 -2 -9 -4 5.44 1.68
 2 9 4 6.68 1.8
 -2 9 -4 4.66 1.12
 -3 -9 -4 1.92 1.12
 -3 9 -4 0.7 0.6
 3 9 4 1.33 1.01
 -4 -10 4 0.24 0.79
 4 -10 -4 1 0.91
 4 -10 -4 1.07 1.17
 -4 10 4 0.2 0.89
 4 10 -4 1.63 1.09
 -3 -10 4 16.61 2.13
 3 -10 -4 14.27 2.37
 3 -10 -4 14.96 2.87
 -3 10 4 14.58 2.71
 3 10 -4 20.43 2.79
 -3 10 4 22.2 3.44
 2 -10 -4 10.41 2.54
 2 -10 -4 9.31 1.97
 -2 -10 4 12.1 1.73
 -2 10 4 12.94 2.46
 2 10 -4 11.39 2.06
 -2 10 4 13.65 2.48
 2 10 -4 15.5 2.56
 1 -10 -4 17.07 2.68
 1 -10 -4 19.12 3.25
 -1 -10 4 16.49 1.78
 1 10 -4 29.13 3.23
 -1 10 4 18.43 2.95
 0 -10 -4 3.22 1.03
 0 -10 -4 3.22 1.3
 0 -10 -4 5.42 2.08
 0 10 -4 2.35 1.03
 0 10 4 2.73 1.34
 -1 -10 -4 0.32 0.68
 1 10 4 0.65 0.85
 -10 0 5 0.73 1.16
 -10 0 5 1.41 0.87
 -9 0 5 2.13 1.31
 9 0 -5 0.6 0.55
 -9 0 5 3.14 1.12
 -9 0 5 2.48 0.81
 -8 0 5 0.38 0.6
 -8 0 5 -0.04 0.35
 8 0 -5 -0.26 0.31
 -8 0 5 0.27 0.71
 8 0 -5 0.44 0.64
 -7 0 5 0.43 0.46
 -7 0 5 -0.61 0.55
 -7 0 5 0.8 0.6
 7 0 -5 0.54 0.83
 7 0 -5 -0.3 0.25
 7 0 -5 -0.03 0.51
 -6 0 5 32.28 2.04
 -6 0 5 35.64 2.34
 6 0 -5 29.38 2.24
 6 0 -5 30.42 1.9
 -6 0 5 31.76 2.72
 6 0 -5 31.64 3.49
 5 0 -5 42.42 3.03
 -5 0 5 40.62 2.22
 5 0 -5 40.65 1.54
 5 0 -5 35.91 2.35
 -5 0 5 39.65 2.78
 5 0 -5 46.88 2.28
 -5 0 5 42.4 2.46
 4 0 -5 18.36 2.11
 4 0 -5 15.84 1.39
 4 0 -5 16.04 0.94
 -4 0 5 17.14 1.58
 -4 0 5 15.14 1.34
 -4 0 5 15.7 1.27
 4 0 -5 14.55 1.2
 3 0 -5 0.21 0.36
 3 0 -5 0.96 0.4
 -3 0 5 0.65 0.41
 3 0 -5 0.96 0.55
 3 0 -5 1.49 0.4
 -3 0 5 0.67 0.39
 -3 0 5 0.89 0.48
 2 0 -5 8.75 0.99
 2 0 -5 10.24 0.9
 2 0 -5 10.18 1.23
 -2 0 5 9.37 1.06
 -2 0 5 7.65 0.87
 -2 0 5 11.22 1.22
 2 0 -5 12.45 1.32
 1 0 -5 60.67 2.6
 -1 0 5 61.35 2.56
 1 0 -5 61.25 2.45
 1 0 -5 58.8 2.59
 -1 0 5 59.15 2.45
 -1 0 5 59.99 2.68
 0 0 5 0.16 0.27
 0 0 -5 1.1 0.46
 0 0 5 0.48 0.25
 0 0 -5 0.95 0.34
 0 0 -5 1.06 0.44
 -1 0 -5 -0.07 0.33
 -1 0 -5 0.19 0.24
 1 0 5 -0.39 0.13
 1 0 5 0.19 0.35
 2 0 5 9.87 0.74
 -2 0 -5 11.94 1.48
 2 0 5 11.8 1.37
 -2 0 -5 8.81 0.75
 -3 0 -5 1.39 0.34
 -3 0 -5 1.15 0.6
 3 0 5 1.42 0.34
 -4 0 -5 5.22 1.28
 -4 0 -5 2.85 0.84
 4 0 5 2.9 0.42
 -5 0 -5 0.33 0.65
 5 0 5 0.22 0.25
 5 0 5 0.66 0.22
 -5 0 -5 0.85 0.6
 -5 0 -5 1.29 1.21
 -6 0 -5 1.37 0.96
 -6 0 -5 1.15 1.25
 -6 0 -5 0.91 0.62
 -10 -1 5 15.06 2.98
 -10 -1 5 18.88 2.57
 -10 1 5 17.89 3.3
 -10 1 5 16.3 2.34
 9 -1 -5 2.77 0.8
 -9 -1 5 1.66 1.04
 -9 -1 5 0.7 1.17
 -9 -1 5 2.13 0.8
 9 -1 -5 2.91 1.13
 -9 1 5 2.08 0.81
 -9 1 5 1.68 1.25
 -9 1 5 1.77 0.88
 9 1 -5 2.52 0.81
 -8 -1 5 0.77 0.86
 8 -1 -5 1.43 0.79
 8 -1 -5 0.5 0.41
 -8 -1 5 1.11 0.57
 -8 -1 5 0.47 0.61
 -8 1 5 1.13 0.58
 -8 1 5 1.21 0.78
 8 1 -5 1.15 0.63
 -8 1 5 1.77 1.12
 -7 -1 5 28.61 2.03
 7 -1 -5 25.26 3.26
 -7 -1 5 32.41 2.98
 -7 -1 5 25.34 2.22
 7 -1 -5 27.45 1.83
 7 -1 -5 24.78 2.09
 -7 1 5 27.32 3.28
 7 1 -5 30.76 3.73
 -7 1 5 28.32 1.93
 7 1 -5 29.91 2.47
 -7 1 5 29.3 2.19
 7 1 -5 28.45 1.95
 -6 -1 5 22.86 1.95
 6 -1 -5 25.63 3.13
 -6 -1 5 19.68 2.59
 -6 -1 5 20.56 1.65
 6 -1 -5 21.51 1.82
 6 -1 -5 20.33 1.5
 6 1 -5 20.52 0.79
 6 1 -5 20.13 0.94
 -6 1 5 20.08 1.67
 6 1 -5 19.08 2.16
 -6 1 5 25.13 2.88
 6 1 -5 21.31 1.61
 -6 1 5 21.13 1.56
 6 1 -5 19.97 2.74
 -5 -1 5 6.35 1.09
 5 -1 -5 6.75 0.72
 5 -1 -5 6.51 0.98
 5 -1 -5 7.56 1.55
 5 -1 -5 6.37 1.04
 -5 -1 5 6.05 1.13
 -5 -1 5 7.33 1.5
 -5 1 5 6.77 1.09
 5 1 -5 6.91 1.04
 5 1 -5 6.94 1.22
 -5 1 5 7.57 1.44
 -5 1 5 4.48 0.85
 5 1 -5 4.99 1.29
 5 1 -5 6.22 0.51
 4 -1 -5 5.26 0.91
 -4 -1 5 5.26 0.92
 4 -1 -5 5.37 0.87
 -4 -1 5 5.81 1.17
 4 -1 -5 4.82 1.18
 -4 -1 5 6.6 1.11
 4 -1 -5 5.21 0.71
 4 1 -5 4.63 0.96
 -4 1 5 5.24 0.9
 4 1 -5 3.64 0.95
 -4 1 5 5.44 0.89
 4 1 -5 5.4 0.63
 -4 1 5 4.67 0.58
 -4 1 5 3.49 0.93
 4 1 -5 5.1 0.87
 -3 -1 5 2.61 0.66
 3 -1 -5 2.85 0.79
 3 -1 -5 2.39 0.64
 3 -1 -5 2.09 0.51
 3 -1 -5 2.33 0.56
 -3 -1 5 4.8 0.9
 -3 -1 5 2.73 0.65
 3 1 -5 3.19 0.56
 -3 1 5 3.98 0.86
 3 1 -5 3.26 0.74
 -3 1 5 2.77 0.64
 -3 1 5 4.28 0.62
 3 1 -5 3.69 0.74
 3 1 -5 3.12 0.82
 2 -1 -5 16.86 1.31
 2 -1 -5 17.18 1.41
 2 -1 -5 17.54 1.26
 2 -1 -5 18.81 1.26
 -2 -1 5 18.04 1.18
 -2 -1 5 20.14 1.33
 -2 1 5 19 1.49
 -2 1 5 17.03 1.17
 2 1 -5 18.14 1.27
 2 1 -5 19.35 1.46
 2 1 -5 20.03 1.3
 -2 1 5 18.78 1.26
 2 1 -5 18.79 1.21
 1 -1 -5 63.15 2.86
 1 -1 -5 59.59 2.54
 1 -1 -5 61.76 2.74
 -1 -1 5 63.93 2.5
 -1 -1 5 58.94 2.53
 1 1 -5 62.98 2.49
 -1 1 5 65.43 2.73
 1 1 -5 66.34 2.6
 -1 1 5 61.89 3.01
 1 1 -5 65.72 2.97
 -1 1 5 67.23 2.65
 1 1 -5 66.19 2.78
 0 -1 -5 33.08 1.95
 0 -1 -5 32.42 1.69
 0 -1 -5 31.75 1.98
 0 -1 5 31.89 1.62
 0 1 -5 31.94 1.64
 0 1 -5 31.48 1.85
 0 1 5 32.99 1.63
 0 1 5 32.78 1.85
 0 1 -5 33.34 1.57
 -1 -1 -5 8.49 1.18
 -1 -1 -5 5.78 1.07
 1 -1 5 6.87 0.8
 -1 -1 -5 5.94 0.81
 1 1 5 6.4 0.97
 -1 1 -5 5.86 0.66
 1 1 5 5.07 0.69
 -1 1 -5 4.82 0.9
 -2 -1 -5 6.39 0.84
 2 -1 5 5.23 0.65
 -2 -1 -5 4.89 1.01
 -2 1 -5 5.84 1.04
 -2 1 -5 6.77 0.57
 2 1 5 6.84 0.78
 2 1 5 4.91 0.92
 -3 -1 -5 66.04 2.57
 -3 -1 -5 62.19 3.3
 3 -1 5 63.99 2.27
 -3 -1 -5 62.31 3.68
 3 1 5 71.4 3.33
 -3 1 -5 67.9 2.02
 3 1 5 64.68 2.48
 -3 1 -5 67.65 3.34
 4 -1 5 16.07 0.84
 -4 -1 -5 18.41 2.11
 -4 -1 -5 15.76 2.24
 4 1 5 16.89 1
 -4 1 -5 14.84 2.08
 -4 1 -5 16.04 2.54
 -4 1 -5 15.8 1.85
 4 1 5 14.96 1.73
 -5 -1 -5 16.07 2.46
 -5 -1 -5 18.04 2.15
 5 1 5 17.9 1
 -5 1 -5 17.94 2.46
 -5 1 -5 20.88 1.87
 5 1 5 19.12 1.47
 -5 1 -5 17.1 2.7
 -6 -1 -5 1.38 1.23
 -6 -1 -5 3.55 1.02
 -6 -1 -5 0.5 0.75
 -6 1 -5 2.34 1.25
 -6 1 -5 3.03 0.98
 -6 1 -5 2.21 1.07
 6 1 5 2.84 0.57
 -10 -2 5 5.65 1.92
 -10 -2 5 4.96 1.39
 -10 2 5 6.47 1.44
 -10 2 5 5.88 2.32
 9 -2 -5 10.87 1.79
 9 -2 -5 11.76 1.45
 -9 -2 5 9.48 1.52
 -9 -2 5 8.73 1.82
 -9 -2 5 12.75 2.57
 9 2 -5 11.59 1.59
 -9 2 5 10.8 1.64
 -9 2 5 13.95 2.72
 8 -2 -5 11.56 1.74
 -8 -2 5 8.4 2.03
 -8 -2 5 11.14 1.92
 -8 -2 5 11.18 1.6
 8 -2 -5 11.93 1.46
 -8 2 5 12.01 1.65
 8 2 -5 13.47 1.69
 -8 2 5 8.81 2.04
 -8 2 5 12.21 1.51
 -7 -2 5 11.62 2.17
 7 -2 -5 15.84 1.87
 -7 -2 5 13.36 1.69
 -7 -2 5 15.05 2.07
 7 -2 -5 8.25 2.14
 7 -2 -5 15.34 1.57
 7 2 -5 15.75 0.85
 -7 2 5 12.87 2.26
 7 2 -5 16.74 2.8
 -7 2 5 17.01 1.75
 7 2 -5 15.78 2.17
 7 2 -5 15.93 1.81
 -7 2 5 18.01 1.95
 6 -2 -5 5.47 0.93
 -6 -2 5 6.87 1.32
 6 -2 -5 4.94 1.01
 6 -2 -5 3.75 1.2
 6 -2 -5 3.3 0.57
 -6 -2 5 6.14 1.5
 -6 -2 5 5.96 1.12
 6 2 -5 5.04 1.04
 -6 2 5 7.81 1.16
 -6 2 5 5.03 0.95
 6 2 -5 5.13 0.76
 6 2 -5 5.08 1.43
 6 2 -5 5.49 1.23
 -6 2 5 6.25 1.5
 -6 2 5 5.96 0.46
 5 -2 -5 3.82 0.69
 -5 -2 5 2.87 0.97
 5 -2 -5 3.2 0.77
 5 -2 -5 2.05 0.89
 -5 -2 5 2.47 0.78
 -5 -2 5 3.21 0.82
 5 -2 -5 3.53 0.75
 -5 2 5 2.84 0.46
 5 2 -5 2.32 0.96
 -5 2 5 4.63 0.85
 -5 2 5 3.51 1.07
 -5 2 5 3.09 0.72
 5 2 -5 2.79 0.85
 5 2 -5 2.55 0.7
 4 -2 -5 0.65 0.41
 4 -2 -5 1.4 0.47
 4 -2 -5 1.87 0.74
 -4 -2 5 1.55 0.69
 -4 -2 5 2.4 0.7
 4 -2 -5 1.21 0.5
 -4 -2 5 2.28 0.7
 -4 2 5 1.11 0.61
 -4 2 5 2.81 0.52
 4 2 -5 0.55 0.59
 4 2 -5 0.63 0.45
 -4 2 5 0.68 0.39
 4 2 -5 1.8 0.6
 3 -2 -5 44.65 2.2
 -3 -2 5 42.58 2.16
 3 -2 -5 41.94 2.12
 3 -2 -5 39.81 2.1
 -3 -2 5 41.13 2.25
 -3 -2 5 43.71 2.41
 3 -2 -5 41.84 2.54
 -3 2 5 41.38 1.96
 3 2 -5 40.8 2.21
 3 2 -5 41.69 2.38
 3 2 -5 44.35 2.49
 -3 2 5 45.87 2.19
 -3 2 5 43.93 2.57
 -2 -2 5 16.86 1.39
 2 -2 -5 13.94 1.23
 2 -2 -5 16.06 1.43
 2 -2 -5 15.59 1.22
 -2 -2 5 13.51 1.18
 -2 -2 5 15.24 0.95
 -2 2 5 17.26 1.24
 -2 2 5 19.16 1.59
 2 2 -5 16.06 1.24
 2 2 -5 16.51 1.4
 -2 2 5 16.25 1.2
 2 2 -5 15.31 1.14
 1 -2 -5 64.6 2.76
 1 -2 -5 59.55 2.86
 1 -2 -5 61.55 3.02
 -1 -2 5 59.11 2.65
 1 2 -5 64.12 2.96
 1 2 -5 61.99 2.65
 -1 2 5 64.18 3.24
 1 2 -5 64 2.27
 -1 2 5 63.8 2.69
 -1 2 5 68.35 2.88
 0 -2 5 31.51 1.72
 0 -2 -5 36.6 2.16
 0 -2 -5 32.51 2.14
 0 -2 -5 33.61 1.86
 0 2 -5 35.11 1.49
 0 2 -5 35.54 2.02
 0 2 5 33.57 1.79
 0 2 -5 35.31 1.71
 0 2 5 36.65 2.05
 -1 -2 -5 14.31 1.17
 -1 -2 -5 12.56 1.67
 -1 -2 -5 12.08 1.54
 1 -2 5 12.64 0.98
 -1 2 -5 12.26 0.85
 1 2 5 12.88 1.44
 1 2 5 12.14 0.99
 -1 2 -5 12.28 1.41
 -2 -2 -5 24.56 2.11
 2 -2 5 26.63 1.38
 -2 -2 -5 26.89 1.66
 -2 -2 -5 20.75 1.83
 2 2 5 25.61 1.82
 -2 2 -5 28.63 1.91
 -2 2 -5 24.54 1.13
 -2 2 -5 19.13 1.81
 2 2 5 28.81 1.55
 -3 -2 -5 17.29 1.32
 3 -2 5 17.53 1.04
 -3 -2 -5 17.77 2.27
 -3 -2 -5 16.48 1.94
 3 2 5 17.94 1.59
 3 2 5 18.19 1.42
 -3 2 -5 21.41 1.73
 3 2 5 18.85 1.26
 -3 2 -5 19.03 2.38
 -4 -2 -5 8.42 1.69
 -4 -2 -5 5.91 1.27
 -4 2 -5 2.98 0.95
 -4 2 -5 4.07 1.28
 4 2 5 6.44 0.99
 4 2 5 5.26 0.77
 -4 2 -5 8.09 1.31
 -5 -2 -5 4.17 1.24
 -5 -2 -5 6.3 1.62
 -5 2 -5 2.68 1.24
 -5 2 -5 2.11 0.94
 5 2 5 2.93 0.58
 -5 2 -5 3.37 0.95
 -6 -2 -5 7.84 1.84
 -6 -2 -5 6.81 1.47
 -6 2 -5 7.75 1.77
 6 2 5 10.87 0.9
 -6 2 -5 5.89 1.85
 -6 2 -5 8.04 1.45
 -10 -3 5 3.39 1.74
 -10 -3 5 5.49 1.59
 -10 3 5 8.21 1.47
 9 -3 -5 7.9 1.42
 -9 -3 5 4.37 1.63
 -9 -3 5 9.76 1.92
 -9 -3 5 12.17 2.19
 9 -3 -5 10.46 1.44
 -9 3 5 11.08 1.61
 -9 3 5 11.6 2.49
 9 3 -5 6.83 1.28
 -8 -3 5 2.76 0.87
 8 -3 -5 3.16 0.95
 8 -3 -5 4.41 0.93
 -8 -3 5 4.48 1.29
 -8 -3 5 3.43 1.58
 -8 3 5 4.12 1.5
 8 3 -5 4.41 0.61
 8 3 -5 3.45 0.96
 -8 3 5 4.09 0.35
 -8 3 5 4.41 0.94
 -8 3 5 4.97 1.07
 -7 -3 5 10.2 1.77
 7 -3 -5 11.38 1.47
 -7 -3 5 11.32 1.66
 7 -3 -5 7.97 1.22
 -7 -3 5 8.09 1.89
 7 3 -5 13.45 1.72
 -7 3 5 12.09 1.44
 -7 3 5 12.04 0.79
 7 3 -5 11.45 1.04
 -7 3 5 8.78 1.23
 -7 3 5 12.87 2.43
 6 -3 -5 7.22 1.11
 6 -3 -5 10.64 1.23
 6 -3 -5 10.57 1.98
 -6 -3 5 9.65 1.45
 -6 -3 5 8.99 1.85
 6 -3 -5 8.13 1.17
 -6 -3 5 11.71 1.8
 -6 3 5 13.16 2.08
 6 3 -5 8.25 1.57
 6 3 -5 10.12 1.25
 -6 3 5 11.56 1.36
 -6 3 5 10.94 0.86
 6 3 -5 9.36 1.44
 -6 3 5 10.61 1.3
 -5 -3 5 19.34 1.98
 5 -3 -5 16.99 2.3
 5 -3 -5 16.39 1.34
 -5 -3 5 16.73 1.99
 5 -3 -5 19.84 1.51
 -5 -3 5 23.63 2.17
 5 -3 -5 15.2 1.35
 5 3 -5 16.98 2.09
 5 3 -5 16.97 1.54
 -5 3 5 18.82 1.44
 5 3 -5 18.79 1.62
 -5 3 5 20.39 2.44
 -5 3 5 19.06 1.24
 4 -3 -5 30.16 2.35
 -4 -3 5 30.28 2.05
 -4 -3 5 29.86 2.13
 4 -3 -5 28.66 1.9
 4 -3 -5 28.89 1.85
 -4 -3 5 31.41 2.17
 4 -3 -5 27.86 1.68
 -4 3 5 29.67 1.82
 4 3 -5 29.29 2.24
 4 3 -5 31.19 2.05
 -4 3 5 31.08 2.36
 -4 3 5 32.7 1.75
 4 3 -5 28.59 2.19
 -3 -3 5 25.12 1.8
 3 -3 -5 24.76 1.98
 3 -3 -5 22.51 1.62
 3 -3 -5 22.85 1.48
 -3 -3 5 28.15 1.66
 3 -3 -5 27.74 1.86
 -3 -3 5 23.07 1.78
 -3 3 5 25.96 1.65
 3 3 -5 26.51 1.96
 3 3 -5 21.6 1.65
 -3 3 5 24.97 2.02
 -3 3 5 30.31 1.74
 3 3 -5 24.99 1.76
 -2 -3 5 20.04 1.54
 2 -3 -5 21.31 1.56
 2 -3 -5 19.98 1.62
 -2 -3 5 21.69 1.62
 -2 -3 5 20.71 1.02
 2 -3 -5 23.12 1.82
 -2 3 5 23.65 1.92
 2 3 -5 20.64 1.53
 2 3 -5 23.17 1.75
 -2 3 5 21.3 1.56
 -2 3 5 24 1.56
 1 -3 -5 24.67 1.71
 1 -3 -5 23.27 1.82
 -1 -3 5 29.01 1.78
 1 -3 -5 28.56 2.04
 -1 3 5 27.47 1.7
 1 3 -5 29.58 1.72
 -1 3 5 28.7 2.19
 -1 3 5 27.56 1.84
 1 3 -5 26.77 1.82
 0 -3 -5 19.32 1.5
 0 -3 -5 18.16 1.68
 0 -3 5 19.08 1.39
 0 -3 -5 19.52 1.69
 0 3 5 21.1 1.61
 0 3 -5 21.35 1.58
 0 3 -5 19.7 1.31
 0 3 5 16.51 1.3
 -1 -3 -5 16.88 1.43
 1 -3 5 17.55 1.27
 -1 -3 -5 19.91 1.75
 -1 -3 -5 18.18 2.11
 1 3 5 19.82 1.62
 -1 3 -5 18.37 1.25
 -1 3 -5 20.23 1.2
 1 3 5 18.76 1.37
 2 -3 5 91.63 3.43
 -2 -3 -5 96.38 4.64
 -2 -3 -5 92.36 3.91
 -2 -3 -5 88.74 4.31
 -2 3 -5 91.58 4.03
 -2 3 -5 97.27 3.2
 -2 3 -5 99.28 4.22
 2 3 5 97.88 4.26
 2 3 5 102.31 3.86
 -3 -3 -5 68.66 4.05
 3 -3 5 71.87 2.75
 -3 -3 -5 71.5 3.83
 -3 -3 -5 67.2 3.2
 -3 3 -5 83.29 3.8
 -3 3 -5 69.57 3.79
 3 3 5 79.95 3.79
 3 3 5 74.92 3.51
 -3 3 -5 76.29 2.33
 3 3 5 78.73 3.26
 -3 3 -5 73.64 2.48
 -4 -3 -5 3.37 1.02
 4 -3 5 2.8 0.5
 -4 -3 -5 0.57 0.7
 -4 3 -5 1.24 0.67
 -4 3 -5 2.03 0.92
 4 3 5 2.11 0.61
 4 3 5 2.09 0.71
 -5 -3 -5 4.54 1.25
 -5 -3 -5 3.49 1.27
 -5 3 -5 4.33 1.24
 -5 3 -5 6.64 1.32
 -5 3 -5 4.55 1.4
 -6 -3 -5 20.97 2.6
 -6 -3 -5 24.84 3.27
 -6 3 -5 27.38 2.26
 -6 3 -5 29.48 3.2
 -6 3 -5 23.09 3.09
 -9 -4 5 1.16 1.25
 9 -4 -5 0.35 0.62
 -9 -4 5 2.16 1.13
 -9 4 5 2.32 0.78
 -9 4 5 2.52 1.38
 9 4 -5 1.59 0.82
 8 -4 -5 5.59 1.08
 -8 -4 5 4.57 1.2
 -8 -4 5 3.08 1.13
 -8 -4 5 2.38 1.26
 8 -4 -5 5.85 1.12
 8 4 -5 7.24 1.38
 -8 4 5 5.8 1
 -8 4 5 6.31 1.1
 -8 4 5 8.11 1.98
 8 4 -5 5.04 0.87
 -7 -4 5 24.22 3.19
 -7 -4 5 31.14 2.72
 7 -4 -5 28.88 1.97
 7 -4 -5 31.46 2.13
 -7 -4 5 34.06 2.49
 -7 4 5 33.65 2.15
 7 4 -5 35.42 2.54
 -7 4 5 34.14 1.83
 -7 4 5 33.76 1.99
 -7 4 5 34.03 3.1
 7 4 -5 39.17 2.27
 6 -4 -5 10.37 2.26
 -6 -4 5 9.82 1.88
 -6 -4 5 9.05 1.74
 -6 -4 5 11.81 1.69
 6 -4 -5 11.03 1.48
 6 -4 -5 11.29 1.32
 6 -4 -5 9.8 1.4
 6 4 -5 9.88 1.43
 -6 4 5 12.27 2.13
 6 4 -5 13.91 2.39
 -6 4 5 11.94 1.32
 -6 4 5 15.06 1.61
 6 4 -5 12.33 1.7
 5 -4 -5 6.24 0.93
 -5 -4 5 6.77 1.43
 5 -4 -5 5.52 1.12
 -5 -4 5 5.75 1.16
 5 -4 -5 6.86 1.58
 5 -4 -5 7.8 1.25
 -5 -4 5 6.52 1.3
 5 4 -5 8.99 1.61
 -5 4 5 7.4 1.51
 5 4 -5 3.73 1.03
 -5 4 5 9.77 1.26
 5 4 -5 8.11 1.37
 -5 4 5 8.91 1.18
 4 -4 -5 12.67 1.86
 4 -4 -5 14.86 1.68
 4 -4 -5 11.84 1.03
 -4 -4 5 13.73 1.71
 4 -4 -5 14.7 1.81
 -4 -4 5 13.08 1.73
 -4 -4 5 13.69 1.71
 -4 4 5 15.13 1.32
 4 4 -5 13.7 1.88
 -4 4 5 17.16 2.22
 4 4 -5 14.45 1.76
 -4 4 5 15.07 1.33
 4 4 -5 16 2
 3 -4 -5 5.96 1.26
 3 -4 -5 6.2 1.24
 -3 -4 5 7.89 1.26
 -3 -4 5 7.22 1.2
 -3 -4 5 4.73 0.85
 3 -4 -5 7.79 1.21
 3 4 -5 6.41 1.19
 -3 4 5 7.14 1.14
 3 4 -5 8.75 1.32
 -3 4 5 7.31 1.1
 -3 4 5 4.23 1.05
 -2 -4 5 2.15 0.36
 -2 -4 5 2.03 0.64
 -2 -4 5 1.22 0.57
 2 -4 -5 2.25 0.69
 2 -4 -5 1.94 0.77
 2 -4 -5 2.02 0.77
 2 4 -5 1.25 0.56
 -2 4 5 2.96 0.76
 -2 4 5 1.75 0.62
 -2 4 5 2.76 0.95
 2 4 -5 0.88 0.54
 -1 -4 5 3.62 0.82
 1 -4 -5 5.01 1.01
 1 -4 -5 3.57 0.99
 1 -4 -5 4.75 1.07
 -1 4 5 3.58 0.9
 -1 4 5 3.68 1.09
 1 4 -5 5.91 1.04
 1 4 -5 3.98 0.83
 -1 4 5 4.38 0.88
 0 -4 -5 30.44 2.33
 0 -4 -5 33.73 2.41
 0 -4 -5 35.06 2.23
 0 -4 5 29.71 1.93
 0 4 5 34.44 2.29
 0 4 5 34.92 2.1
 0 4 -5 33.41 1.92
 0 4 -5 36.39 2.16
 -1 -4 -5 2.27 0.86
 -1 -4 -5 2.04 0.78
 1 -4 5 1.9 0.58
 -1 -4 -5 1.49 0.73
 -1 -4 -5 0.73 0.56
 -1 4 -5 2.35 0.7
 -1 4 -5 2.48 0.37
 1 4 5 1.36 0.55
 1 4 5 1.04 0.63
 -1 4 -5 2.15 0.54
 -2 -4 -5 5.78 1.29
 -2 -4 -5 4.9 1.02
 -2 -4 -5 5.25 1.3
 -2 -4 -5 3.22 0.99
 2 -4 5 4.17 0.77
 -2 4 -5 4.6 0.82
 -2 4 -5 5.12 0.71
 -2 4 -5 4.73 0.81
 2 4 5 4.56 1.01
 2 4 5 4.26 1.06
 2 4 5 5.87 1.02
 -3 -4 -5 24.62 1.92
 -3 -4 -5 19.25 2.44
 3 -4 5 25.66 1.58
 -3 -4 -5 27.6 3.05
 -3 4 -5 25.1 1.36
 3 4 5 27.7 1.9
 3 4 5 28.34 2.12
 -3 4 -5 24.33 1.15
 -3 4 -5 27.43 2.04
 -4 -4 -5 13.9 2.04
 4 -4 5 14.41 1.1
 -4 -4 -5 15.93 2.39
 -4 4 -5 11.59 1.83
 -4 4 -5 16.85 1.98
 4 4 5 14.55 1.81
 5 -4 5 5.23 0.63
 -5 -4 -5 3.86 1.34
 -5 -4 -5 5.07 1.4
 -5 4 -5 5.15 1.22
 -5 4 -5 7.25 1.66
 -5 4 -5 7.48 1.51
 -6 -4 -5 2.42 1.16
 -6 4 -5 2.01 1.05
 -6 4 -5 3.99 1.11
 -6 4 -5 3.37 1.15
 -9 -5 5 -0.68 0.53
 -9 -5 5 1.56 1.33
 -9 5 5 0.74 0.99
 9 5 -5 -0.24 0.51
 -8 -5 5 2 1.22
 8 -5 -5 1.51 0.71
 -8 -5 5 0.97 0.75
 -8 -5 5 1.41 0.92
 -8 5 5 1.71 0.57
 -8 5 5 3.47 1.38
 8 5 -5 3.02 1.02
 -7 -5 5 17.69 2.43
 7 -5 -5 12.62 1.33
 -7 -5 5 15.56 2.08
 -7 -5 5 13.85 2.45
 7 -5 -5 14.62 1.76
 -7 5 5 19.74 1.6
 -7 5 5 17.02 1.79
 7 5 -5 17.48 2.18
 7 5 -5 16.52 1.92
 -7 5 5 14.3 2.48
 -6 -5 5 9.63 1.75
 6 -5 -5 9.24 1.45
 -6 -5 5 9.66 1.98
 6 -5 -5 11.21 1.23
 6 -5 -5 8.94 1.48
 -6 -5 5 10.53 1.69
 -6 5 5 9.65 1.88
 6 5 -5 8.89 1.52
 -6 5 5 10.19 1.37
 6 5 -5 9.93 1.67
 -6 5 5 9.71 1.37
 -5 -5 5 6.05 1.33
 -5 -5 5 9.1 1.58
 5 -5 -5 9.72 1.79
 5 -5 -5 6.04 1.2
 5 -5 -5 10.7 1.14
 5 -5 -5 6.61 1.36
 -5 -5 5 8.03 1.6
 -5 5 5 7.62 1.26
 -5 5 5 7.42 1.56
 -5 5 5 7.21 1.12
 5 5 -5 7.96 1.49
 5 5 -5 8.93 1.52
 5 5 -5 9.58 1.73
 -4 -5 5 4.4 1.07
 -4 -5 5 5.17 1.16
 4 -5 -5 5.39 1.13
 4 -5 -5 5.16 1.34
 -4 -5 5 6.39 1.31
 4 -5 -5 6.18 0.84
 4 -5 -5 7.19 1.45
 4 5 -5 8.47 1.57
 -4 5 5 4.4 1.19
 -4 5 5 6.72 1.21
 4 5 -5 5.29 1.43
 4 5 -5 6.83 1.27
 -4 5 5 6.27 1.1
 -3 -5 5 29.31 1.88
 3 -5 -5 26.6 2.07
 -3 -5 5 29.53 2.2
 -3 -5 5 33.39 2.27
 3 -5 -5 29.16 2.38
 3 -5 -5 32.2 2.48
 -3 5 5 30.91 2.09
 3 5 -5 37.63 2.46
 -3 5 5 33.16 2.64
 3 5 -5 37.88 2.6
 -3 5 5 34.84 2.36
 -2 -5 5 1.93 0.66
 2 -5 -5 1.61 0.78
 -2 -5 5 2.86 0.4
 2 -5 -5 1.89 0.71
 -2 -5 5 2.31 0.71
 2 -5 -5 3.79 1
 -2 -5 5 2.85 0.46
 2 5 -5 1.88 0.73
 2 5 -5 1.08 0.63
 -2 5 5 3.35 1.06
 -2 5 5 1.59 0.64
 -2 5 5 3.51 0.95
 1 -5 -5 4.42 1.13
 -1 -5 5 4.68 1.04
 1 -5 -5 4.62 1.11
 1 -5 -5 3.28 1.06
 1 5 -5 4.02 0.94
 -1 5 5 4.49 0.96
 -1 5 5 4.67 1.22
 1 5 -5 4.2 0.92
 -1 5 5 5.03 1.12
 0 -5 -5 8.25 1.38
 0 -5 -5 9.98 1.72
 0 -5 5 9.7 1.35
 0 -5 -5 9.47 1.43
 0 -5 -5 11.69 1.8
 0 5 5 10.64 1.43
 0 5 -5 8.74 1.26
 0 5 -5 7.39 1.15
 0 5 5 6.78 1.27
 0 5 5 7.95 1.43
 1 -5 5 0.56 0.43
 -1 -5 -5 1.28 0.67
 -1 -5 -5 0.48 0.59
 -1 -5 -5 0.79 0.71
 -1 -5 -5 1.39 0.74
 1 5 5 0.53 0.52
 1 5 5 0.71 0.53
 -1 5 -5 1.34 0.55
 -1 5 -5 0.67 0.52
 1 5 5 0.06 0.42
 -2 -5 -5 42.07 2.76
 -2 -5 -5 44.93 3.16
 2 -5 5 45.16 2.47
 -2 -5 -5 44.67 3.21
 2 5 5 38.47 2.74
 -2 5 -5 44.67 2.18
 -2 5 -5 47.09 2.51
 -2 5 -5 48.25 2.58
 -2 5 -5 45.56 1.99
 -3 -5 -5 1.29 0.83
 3 -5 5 2.2 0.64
 -3 -5 -5 2.97 1.1
 -3 -5 -5 2.36 0.79
 -3 5 -5 2.56 0.62
 -3 5 -5 2.38 0.71
 3 5 5 2.4 0.89
 -3 5 -5 4.15 0.63
 4 -5 5 4.2 0.8
 -4 -5 -5 2.05 1.09
 -4 -5 -5 5.41 1.4
 4 5 5 4.48 1.19
 -4 5 -5 4.59 0.39
 -4 5 -5 4.36 1.09
 5 -5 5 1.03 0.47
 -5 -5 -5 -0.13 0.66
 -5 -5 -5 2.09 1.15
 -5 5 -5 0.91 0.7
 -5 5 -5 0.85 0.83
 -5 5 -5 0.25 0.62
 8 -6 -5 4.33 1.11
 -8 -6 5 5.75 1.99
 -8 -6 5 6.62 1.64
 -8 -6 5 6.97 1.53
 8 6 -5 4.24 1.3
 -8 6 5 4.66 1.61
 -7 -6 5 3.17 1.5
 -7 -6 5 1.05 0.76
 -7 -6 5 2.07 1.03
 7 -6 -5 1.59 0.79
 -7 6 5 1.9 0.74
 7 6 -5 3.73 1.14
 7 6 -5 1.04 0.69
 -7 6 5 2.24 1.11
 -7 6 5 1 0.65
 6 -6 -5 0.8 0.36
 -6 -6 5 0.31 0.82
 6 -6 -5 0.02 0.56
 6 -6 -5 0.47 0.57
 -6 -6 5 0.67 0.69
 -6 -6 5 -0.07 0.57
 6 6 -5 0.16 0.71
 -6 6 5 -0.04 0.61
 -6 6 5 -0.25 0.36
 6 6 -5 0.92 0.73
 -6 6 5 -0.08 0.44
 -5 -6 5 2.09 0.9
 -5 -6 5 1.62 0.76
 5 -6 -5 1.55 0.83
 -5 -6 5 0.97 0.86
 5 -6 -5 3.07 0.91
 5 -6 -5 0.85 0.37
 5 6 -5 1.46 0.89
 5 6 -5 3.14 1.01
 -5 6 5 0.37 0.56
 -5 6 5 0.67 0.5
 -5 6 5 0.63 0.76
 4 -6 -5 8.33 1.7
 4 -6 -5 9.35 1.56
 -4 -6 5 7.85 1.46
 -4 -6 5 11.22 1.66
 4 -6 -5 9.42 1.01
 -4 -6 5 9.86 1.59
 4 6 -5 8.37 1.58
 -4 6 5 7.4 1.25
 4 6 -5 8.02 1.73
 4 6 -5 8.44 1.54
 -4 6 5 11.69 1.98
 -4 6 5 9.71 1.59
 3 -6 -5 18.23 2.39
 3 -6 -5 19.69 2.46
 -3 -6 5 15.87 1.47
 -3 -6 5 21.84 2.39
 3 -6 -5 24.1 2.53
 -3 -6 5 20.59 1.83
 3 6 -5 18.01 2.57
 3 6 -5 20.92 2.39
 -3 6 5 18.61 1.98
 -3 6 5 19.99 2.29
 -3 6 5 20.36 2.64
 3 6 -5 19.28 2.2
 2 -6 -5 8.42 1.2
 2 -6 -5 11.26 1.89
 2 -6 -5 7.89 1.45
 -2 -6 5 10.11 1.4
 -2 -6 5 7.07 1.31
 -2 -6 5 6.07 0.78
 2 -6 -5 7.3 1.42
 -2 -6 5 7.91 0.62
 2 6 -5 6.37 1.25
 -2 6 5 7.22 1.59
 2 6 -5 6.97 1.31
 -2 6 5 10.68 1.56
 -2 6 5 5.95 1.27
 1 -6 -5 29.7 2.36
 1 -6 -5 29.2 3.14
 1 -6 -5 32.33 2.58
 -1 -6 5 35.86 2.18
 1 -6 -5 31.03 2.18
 -1 -6 5 31.76 2.3
 -1 6 5 39.99 2.78
 -1 6 5 37.92 2.5
 -1 6 5 32.74 2.85
 1 6 -5 32.43 2.33
 1 6 -5 32.12 2.31
 -1 6 5 36.3 2.7
 0 -6 5 1.07 0.67
 0 -6 -5 2.64 0.96
 0 -6 -5 3.08 0.93
 0 -6 -5 1.1 0.8
 0 6 -5 3.39 0.9
 0 6 5 2.7 1.06
 0 6 -5 2.66 0.83
 0 6 5 2.66 0.99
 1 -6 5 20.6 1.8
 -1 -6 -5 19.15 2.66
 -1 -6 -5 19.59 2.3
 -1 -6 -5 22.45 2.51
 -1 6 -5 19.11 2.14
 -1 6 -5 23.73 1.76
 1 6 5 23.73 2.65
 -1 6 -5 21.92 1.75
 -2 -6 -5 10.18 1.73
 -2 -6 -5 4.18 1.3
 -2 -6 -5 10.09 1.84
 2 6 5 12.77 1.98
 -2 6 -5 11.87 1.37
 -2 6 -5 10.06 0.79
 -2 6 -5 10.4 1.44
 -2 6 -5 8.16 1.26
 -3 -6 -5 0.35 0.72
 -3 -6 -5 0.59 0.66
 -3 -6 -5 -0.42 0.5
 -3 6 -5 0.06 0.34
 -3 6 -5 -0.05 0.4
 3 6 5 0.29 0.64
 -3 6 -5 0.17 0.38
 -4 -6 -5 0.35 0.77
 -4 -6 -5 0.88 0.91
 -4 6 -5 0.61 0.31
 -4 6 -5 -0.36 0.36
 4 6 5 0.56 0.79
 -5 -6 -5 1.23 1.06
 -5 6 -5 2.51 1
 -8 -7 5 4.74 1.66
 8 7 -5 4.91 1.47
 -8 7 5 7.51 1.66
 -7 -7 5 1.21 0.91
 7 -7 -5 1.49 0.81
 -7 -7 5 0.56 0.92
 7 7 -5 2.42 0.98
 -7 7 5 2.55 1.21
 7 7 -5 0.45 0.69
 -7 7 5 2.24 1
 -7 7 5 2.38 0.99
 -6 -7 5 4.14 1.29
 6 -7 -5 3.51 1.09
 6 -7 -5 3.97 1.31
 -6 -7 5 3.95 1.4
 -6 7 5 4.11 1.11
 -6 7 5 3.84 1.19
 -6 7 5 4.1 1.09
 6 7 -5 5.19 1.35
 6 7 -5 1.78 1.04
 -6 7 5 4.76 1.46
 5 -7 -5 1.08 0.76
 5 -7 -5 2.25 1
 -5 -7 5 0.74 0.79
 5 -7 -5 0.88 0.35
 -5 -7 5 0.22 0.72
 5 7 -5 1.15 0.85
 -5 7 5 0.91 0.72
 -5 7 5 1.83 0.77
 -5 7 5 0.09 0.7
 5 7 -5 0.57 0.85
 -5 7 5 1.27 0.76
 -4 -7 5 5.72 1.24
 -4 -7 5 4.91 1.21
 4 -7 -5 6.58 0.82
 4 -7 -5 8.21 0.98
 4 -7 -5 7.09 1.7
 4 -7 -5 4.69 1.2
 -4 7 5 10.09 1.97
 4 7 -5 8.46 1.6
 -4 7 5 7.7 1.37
 -4 7 5 8.34 1.67
 -4 7 5 5.93 1.39
 4 7 -5 7.06 1.72
 -3 -7 5 17.67 1.33
 -3 -7 5 19.65 2.2
 3 -7 -5 24.6 2.59
 3 -7 -5 18.17 1.42
 -3 -7 5 19.32 1.7
 3 -7 -5 20.01 2.73
 -3 7 5 21.27 2.27
 3 7 -5 23.55 3.56
 -3 7 5 24.52 3.06
 -3 7 5 24.82 2.81
 3 7 -5 23.32 2.62
 3 7 -5 20.08 2.4
 -3 7 5 25 2.8
 -2 -7 5 5.92 0.93
 -2 -7 5 7.98 0.72
 2 -7 -5 10.46 1.98
 2 -7 -5 7.03 1.44
 2 -7 -5 6.22 1.08
 -2 -7 5 11.59 1.58
 2 7 -5 8.84 1.56
 -2 7 5 8.83 1.86
 2 7 -5 9.43 1.6
 -2 7 5 9.64 1.8
 -1 -7 5 3.4 0.44
 -1 -7 5 3.02 0.78
 -1 -7 5 2.79 0.37
 1 -7 -5 2.35 1.11
 1 -7 -5 3.05 0.89
 1 -7 -5 3.53 1.12
 -1 7 5 4.56 1.32
 1 7 -5 4.43 1.1
 1 7 -5 1.66 0.71
 0 -7 -5 7.7 1.54
 0 -7 -5 5.65 1.25
 0 -7 -5 3.01 1.2
 0 7 -5 5.69 1.21
 0 7 -5 3.87 1
 0 7 5 7.02 1.59
 0 7 -5 6.3 1.38
 -1 -7 -5 6.17 1.39
 -1 -7 -5 8.46 1.61
 -1 -7 -5 4.02 1.32
 -1 7 -5 5.59 1.19
 1 7 5 5.86 1.43
 -1 7 -5 7.49 1.34
 -1 7 -5 7.51 1.27
 -2 -7 -5 2.61 1.12
 -2 -7 -5 0.9 0.76
 -2 -7 -5 3.75 1.15
 -2 7 -5 3.78 0.93
 -2 7 -5 4.91 1.02
 2 7 5 3.78 1.24
 -3 -7 -5 5.58 1.39
 -3 -7 -5 4.96 1.51
 -3 -7 -5 2.6 1.09
 -3 7 -5 4.87 0.91
 -3 7 -5 5.55 1.05
 3 7 5 5.06 1.37
 -4 -7 -5 0.06 0.77
 -4 -7 -5 -0.25 0.83
 -4 7 -5 -0.08 0.34
 -7 -8 5 1.05 1.08
 7 -8 -5 0.83 0.81
 -7 -8 5 3.38 1.37
 7 8 -5 2.75 1.18
 -7 8 5 6.19 1.83
 -6 -8 5 -0.08 0.75
 -6 -8 5 0.59 0.77
 6 -8 -5 0.74 0.71
 -6 8 5 1.14 0.9
 6 8 -5 1.44 0.92
 -6 8 5 -0.06 0.52
 -6 8 5 0.99 0.96
 -5 -8 5 7.11 1.5
 -5 -8 5 10.19 1.92
 5 -8 -5 10.09 2.1
 5 -8 -5 7.73 1.65
 -5 8 5 9.79 1.59
 5 8 -5 8.28 1.8
 -5 8 5 9.79 2.16
 -5 8 5 9.7 1.81
 -4 -8 5 15.22 2.09
 -4 -8 5 17.44 2.2
 4 -8 -5 22.84 2.7
 4 -8 -5 11.96 2.3
 4 -8 -5 16.44 1.19
 4 8 -5 18.68 2.54
 -4 8 5 19.38 2.65
 -4 8 5 19.7 2.81
 3 -8 -5 4.16 0.81
 3 -8 -5 2.51 1.01
 -3 -8 5 3.81 1.08
 3 -8 -5 3.36 1.33
 -3 -8 5 4.23 0.8
 -3 -8 5 3.5 0.94
 -3 8 5 2.89 1.16
 3 8 -5 1.88 0.91
 -3 8 5 3.13 1.28
 -2 -8 5 14.1 1.04
 2 -8 -5 11.79 2.28
 2 -8 -5 11.45 1.47
 2 -8 -5 15.16 2.24
 -2 -8 5 9.71 1.49
 -2 8 5 17.66 2.53
 2 8 -5 13.33 1.93
 2 8 -5 17.5 2.32
 -2 8 5 20.2 2.89
 1 -8 -5 10.07 2.1
 1 -8 -5 8.65 1.4
 -1 -8 5 7.93 1.25
 1 -8 -5 7.42 1.61
 1 8 -5 7.02 1.45
 -1 8 5 5.4 1.49
 1 8 -5 10.13 1.94
 1 8 -5 7.52 1.44
 0 -8 -5 2.43 1.18
 0 -8 -5 2.05 0.86
 0 -8 -5 2.73 1.07
 0 8 -5 3.61 1.03
 0 8 -5 2.51 0.92
 0 8 5 2.83 1.18
 0 8 -5 3.7 1.26
 -1 -8 -5 1.31 0.82
 -1 -8 -5 2.67 1.15
 -1 -8 -5 1.37 0.99
 -1 8 -5 2.07 0.78
 1 8 5 2.23 1.1
 -1 8 -5 2.17 0.84
 -2 -8 -5 0.69 0.75
 -2 -8 -5 3.43 1.18
 -2 -8 -5 1.36 1.15
 2 8 5 1.68 0.99
 -2 8 -5 1.35 0.71
 -3 -8 -5 0.61 0.94
 -3 -8 -5 2.02 1.22
 3 8 5 -0.29 0.77
 -3 8 -5 2.66 0.82
 5 -9 -5 6.43 1.54
 -5 -9 5 8.84 1.89
 5 -9 -5 8.95 2.22
 -5 -9 5 7.76 1.63
 -5 9 5 9.89 2.21
 5 9 -5 6.82 1.69
 -4 -9 5 11.6 1.91
 4 -9 -5 12.69 2.18
 -4 -9 5 13.33 2.02
 4 -9 -5 12.47 2.55
 -4 9 5 15.4 2.7
 4 9 -5 18.83 2.62
 -4 9 5 12.1 2.19
 3 -9 -5 -0.37 0.54
 3 -9 -5 0.24 0.9
 -3 -9 5 0.24 0.68
 -3 9 5 0.3 0.78
 -3 9 5 1.17 1.03
 3 9 -5 0.24 0.64
 -2 -9 5 3.06 0.93
 2 -9 -5 1.89 0.69
 2 -9 -5 2.2 1.09
 2 -9 -5 2.05 1.22
 -2 9 5 1.47 0.95
 2 9 -5 3.24 1.14
 -2 9 5 0.11 0.83
 2 9 -5 4.14 1.43
 1 -9 -5 10.23 2.33
 -1 -9 5 14.15 1.71
 1 -9 -5 11.79 2.12
 1 -9 -5 12.33 1.74
 -1 9 5 16.38 2.64
 1 9 -5 12.85 2.02
 1 9 -5 15.63 2.12
 1 9 -5 19.1 2.73
 0 -9 -5 3.65 1.29
 0 -9 -5 5.4 1.29
 0 -9 -5 6.37 1.74
 0 9 -5 4.59 1.15
 0 9 5 4.37 1.55
 0 9 -5 6.3 1.45
 -1 -9 -5 -0.16 0.66
 -1 -9 -5 -0.48 0.66
 -1 -9 -5 0.64 0.82
 -1 9 -5 -0.03 0.57
 1 9 5 0.36 0.74
 -2 -9 -5 0.66 0.76
 2 9 5 -0.08 0.81
 -2 9 -5 -0.06 0.51
 2 -10 -5 0.6 0.72
 2 -10 -5 0.69 1
 -2 -10 5 1.23 0.77
 -2 10 5 1.22 1.09
 1 -10 -5 19.93 3.26
 -1 10 5 23.9 3.28
 -10 0 6 11.45 1.99
 10 0 -6 8.64 1.44
 -10 0 6 4.35 1.74
 -9 0 6 4.52 1.13
 -9 0 6 2.09 1.24
 9 0 -6 2.94 0.84
 -9 0 6 2.51 1.03
 -8 0 6 -0.14 0.37
 8 0 -6 -0.46 0.39
 -8 0 6 0.46 0.92
 -8 0 6 0.19 0.47
 8 0 -6 -0.04 0.55
 7 0 -6 22.86 3.17
 7 0 -6 25.95 1.87
 -7 0 6 26.42 1.97
 -7 0 6 28.06 2.21
 -7 0 6 25.95 3.13
 7 0 -6 21.87 2.41
 6 0 -6 3.36 1.17
 -6 0 6 3.67 0.88
 6 0 -6 4.23 0.5
 6 0 -6 5.59 0.99
 -6 0 6 4.89 1.06
 -6 0 6 1.99 0.89
 6 0 -6 2.78 0.81
 5 0 -6 1.89 0.94
 5 0 -6 0.3 0.26
 5 0 -6 0.21 0.45
 5 0 -6 1.92 0.61
 -5 0 6 0.6 0.57
 -5 0 6 1.22 0.6
 -5 0 6 0.03 0.32
 4 0 -6 20.41 1.85
 4 0 -6 19.29 1.61
 -4 0 6 21.91 1.76
 4 0 -6 19.98 1.49
 -4 0 6 20.19 1.53
 -4 0 6 22.93 1.72
 4 0 -6 19.39 1.22
 3 0 -6 34.84 1.79
 3 0 -6 33.87 1.91
 -3 0 6 32.8 1.93
 -3 0 6 33.33 2.04
 3 0 -6 29.54 1.99
 3 0 -6 35.83 2.22
 2 0 -6 24.73 1.52
 2 0 -6 23.11 1.54
 2 0 -6 24.33 1.73
 -2 0 6 25.12 1.56
 -2 0 6 23.46 1.63
 2 0 -6 22.34 1.58
 1 0 -6 17.96 1.4
 1 0 -6 16.44 1.31
 -1 0 6 16.68 1.22
 -1 0 6 18.14 1.34
 1 0 -6 17.44 1.22
 0 0 6 0.35 0.36
 0 0 6 -0.08 0.25
 0 0 -6 0.1 0.41
 0 0 -6 0.84 0.36
 0 0 -6 0.13 0.33
 -1 0 -6 1.34 0.62
 -1 0 -6 2.07 0.63
 1 0 6 2.49 0.54
 -1 0 -6 2.3 0.54
 1 0 6 1.5 0.59
 -2 0 -6 98.85 4.35
 2 0 6 95.84 3.39
 -2 0 -6 97.12 3.46
 -3 0 -6 0 0.27
 3 0 6 -0.04 0.25
 -3 0 -6 -0.03 0.46
 -4 0 -6 0.36 0.68
 4 0 6 -0.08 0.22
 -4 0 -6 -0.13 0.49
 5 0 6 2.07 0.38
 -5 0 -6 2.89 1.39
 -5 0 -6 0.47 0.76
 -5 0 -6 2.39 0.9
 -6 0 -6 3.36 1.66
 -6 0 -6 7.52 1.62
 -6 0 -6 4.8 1.64
 -10 -1 6 0.75 0.82
 -10 -1 6 2.01 1.23
 -10 1 6 3.58 1.23
 -10 1 6 3.3 1.52
 10 1 -6 2.48 0.86
 -9 -1 6 2.29 0.97
 -9 -1 6 0.69 0.9
 -9 -1 6 1.41 0.76
 9 -1 -6 1.72 0.69
 9 1 -6 2.01 0.78
 -9 1 6 3.19 1.43
 -9 1 6 1.93 0.78
 -9 1 6 3.01 0.97
 8 -1 -6 14.03 1.99
 -8 -1 6 16.66 2.71
 -8 -1 6 17.47 2
 -8 -1 6 17 2.25
 8 -1 -6 12.02 1.52
 -8 1 6 15.17 1.75
 -8 1 6 12.01 2.33
 -8 1 6 14.29 1.92
 8 1 -6 14.38 1.74
 -7 -1 6 5.48 1.63
 -7 -1 6 7.53 1.38
 7 -1 -6 4.91 1.17
 -7 -1 6 8.18 1.33
 7 -1 -6 7.82 1.85
 7 -1 -6 4.82 0.96
 7 1 -6 3.37 1.39
 7 1 -6 5.81 1.33
 -7 1 6 4.44 1.06
 -7 1 6 6 1.09
 -7 1 6 7.64 1.68
 7 1 -6 4.48 1.01
 -6 -1 6 8.02 1.62
 -6 -1 6 10.99 1.65
 -6 -1 6 8.33 1.29
 6 -1 -6 8.53 1.79
 6 -1 -6 6.83 1.22
 6 -1 -6 9.55 0.78
 6 -1 -6 6.65 1.06
 6 1 -6 10.2 1.37
 6 1 -6 8.3 1.46
 6 1 -6 9.56 1.87
 -6 1 6 10.52 1.47
 -6 1 6 7.5 1.59
 6 1 -6 9.38 0.65
 -6 1 6 7.02 1.15
 -5 -1 6 20.96 1.77
 5 -1 -6 21.2 1.55
 5 -1 -6 18.18 2.37
 -5 -1 6 18.85 2.18
 5 -1 -6 17.56 1.16
 5 -1 -6 14.96 1.71
 -5 -1 6 17.27 1.83
 -5 1 6 18.73 2.25
 5 1 -6 16.66 2.24
 5 1 -6 18.81 2.06
 -5 1 6 17.79 1.54
 5 1 -6 20.03 1.11
 5 1 -6 16.17 1.43
 -5 1 6 20.82 1.58
 4 -1 -6 21.87 1.98
 4 -1 -6 25.9 1.51
 -4 -1 6 26.3 1.91
 -4 -1 6 26.12 1.79
 4 -1 -6 22.79 1.7
 -4 -1 6 25.46 1.87
 4 -1 -6 26.39 1.7
 4 1 -6 27.54 1.79
 4 1 -6 26.58 1.42
 -4 1 6 26.28 1.38
 -4 1 6 24.81 1.96
 -4 1 6 26.52 1.73
 4 1 -6 21.67 1.93
 4 1 -6 22.61 1.84
 3 -1 -6 49.01 2.36
 3 -1 -6 50.02 2.43
 -3 -1 6 47.47 2.47
 3 -1 -6 52.88 2.87
 3 -1 -6 49.44 2.57
 -3 -1 6 50.29 2.44
 -3 1 6 50.72 2.27
 3 1 -6 50.92 2.8
 -3 1 6 53.05 2.52
 3 1 -6 56.92 2.83
 -3 1 6 53.03 2.82
 3 1 -6 56.37 2.58
 3 1 -6 46.54 2.26
 2 -1 -6 38.49 2.06
 2 -1 -6 41.52 2.36
 -2 -1 6 40.27 2.01
 -2 -1 6 40.05 2.12
 2 -1 -6 40.01 2.16
 -2 1 6 40.17 2.38
 -2 1 6 40.22 2.06
 2 1 -6 42.16 2.14
 2 1 -6 40.18 2.38
 -2 1 6 41.01 2.09
 2 1 -6 40.03 2.07
 2 1 -6 42.37 2.12
 1 -1 -6 107.08 4.33
 -1 -1 6 110.7 4.08
 1 -1 -6 109.3 4.07
 1 -1 -6 116.96 4.49
 1 1 -6 103.85 3.85
 -1 1 6 107.82 3.92
 -1 1 6 100.66 4.4
 1 1 -6 111.54 3.87
 -1 1 6 110.81 4.13
 1 1 -6 106.63 4.15
 0 -1 6 28.21 1.62
 0 -1 -6 29.95 2.01
 0 -1 -6 28.82 1.96
 0 -1 -6 28.99 1.68
 0 1 -6 33.17 1.65
 0 1 6 29.64 1.64
 0 1 -6 31.01 1.97
 0 1 6 28.67 1.86
 0 1 -6 30.19 1.72
 -1 -1 -6 27.58 1.66
 1 -1 6 28.5 1.56
 -1 -1 -6 31.68 2.2
 -1 -1 -6 30.98 2.13
 1 1 6 30.78 1.65
 -1 1 -6 34.27 2.17
 1 1 6 32.04 2.05
 -1 1 -6 30.73 1.55
 -1 1 -6 31.19 1.91
 -2 -1 -6 2.34 0.6
 2 -1 6 1.21 0.42
 -2 -1 -6 1.09 0.64
 2 1 6 0.96 0.39
 2 1 6 0.74 0.51
 -2 1 -6 1.38 0.65
 -2 1 -6 1.64 0.42
 -3 -1 -6 99.07 5.04
 3 -1 6 96.75 3.35
 -3 -1 -6 96.66 4.59
 -3 -1 -6 100.68 3.64
 -3 1 -6 94.25 4.41
 -3 1 -6 98.34 3.06
 3 1 6 98.81 3.44
 4 -1 6 26.92 1.31
 -4 -1 -6 30.08 2.41
 -4 -1 -6 28.3 3.12
 -4 1 -6 26.8 2.2
 4 1 6 25.35 1.35
 -4 1 -6 25.79 3.12
 -4 1 -6 22.03 2.63
 -5 -1 -6 2.47 0.9
 -5 -1 -6 2.74 1.23
 -5 1 -6 2.87 0.99
 -5 1 -6 0.93 1.03
 5 1 6 1.26 0.39
 -5 1 -6 0.3 0.69
 -10 -2 6 0.97 1.07
 -10 -2 6 0.13 0.7
 -10 2 6 0.15 0.55
 10 2 -6 -0.11 0.51
 -9 -2 6 2.16 1.17
 -9 -2 6 3.29 0.97
 9 -2 -6 3.09 1.05
 -9 -2 6 1.37 1.01
 9 -2 -6 1.1 0.58
 9 2 -6 1.91 0.78
 -9 2 6 2.78 0.96
 -9 2 6 2.86 1.02
 -9 2 6 4.13 1.52
 -8 -2 6 0.95 0.63
 8 -2 -6 1.32 0.74
 8 -2 -6 1.36 0.66
 -8 -2 6 1.51 0.89
 -8 -2 6 2.83 1.26
 -8 2 6 2.18 0.83
 -8 2 6 2.06 0.67
 -8 2 6 1.02 0.89
 8 2 -6 1.06 0.62
 7 -2 -6 10.3 1.58
 7 -2 -6 9.65 1.32
 -7 -2 6 10.89 2.16
 -7 -2 6 8.5 1.41
 -7 -2 6 9.02 1.6
 7 2 -6 9.04 0.61
 7 2 -6 9.26 1.4
 -7 2 6 7.27 1.73
 7 2 -6 10.16 0.85
 -7 2 6 7.72 1.23
 -7 2 6 9.23 1.41
 7 2 -6 6.79 1.86
 6 -2 -6 4.66 0.77
 -6 -2 6 5.83 1.18
 -6 -2 6 3.96 1.2
 6 -2 -6 4.59 0.92
 6 -2 -6 3.54 1.14
 -6 -2 6 3.72 1.04
 6 -2 -6 2.68 0.81
 6 2 -6 3.09 0.98
 6 2 -6 3.21 0.74
 -6 2 6 3.46 1.14
 6 2 -6 3.75 0.9
 -6 2 6 4.04 0.88
 -6 2 6 3.36 0.86
 -6 2 6 4.4 0.55
 6 2 -6 5.54 1.47
 -5 -2 6 1.1 0.61
 -5 -2 6 1.26 0.57
 5 -2 -6 2.36 1.02
 -5 -2 6 2.28 0.89
 5 -2 -6 1.48 0.59
 5 -2 -6 1.32 0.59
 5 -2 -6 2.33 0.61
 -5 2 6 1.84 0.42
 -5 2 6 2.41 0.95
 5 2 -6 1.75 0.7
 5 2 -6 1.8 0.85
 5 2 -6 1.52 0.63
 -5 2 6 1.81 0.63
 4 -2 -6 55.61 2.63
 4 -2 -6 52.69 3.23
 -4 -2 6 58.96 3.1
 -4 -2 6 54.45 2.87
 4 -2 -6 55.37 2.72
 -4 -2 6 58.1 2.9
 4 -2 -6 52.2 2.68
 4 2 -6 55.53 3.18
 4 2 -6 56.48 2.85
 4 2 -6 58.05 3.17
 -4 2 6 52.46 2.66
 -4 2 6 55.86 3.22
 -4 2 6 59.54 2.43
 -3 -2 6 0.54 0.36
 -3 -2 6 1.07 0.56
 3 -2 -6 1.54 0.56
 3 -2 -6 1.14 0.49
 3 -2 -6 1.08 0.5
 -3 -2 6 1.88 0.51
 3 -2 -6 2.72 0.89
 -3 2 6 2.86 0.62
 3 2 -6 0.78 0.48
 3 2 -6 2.52 0.72
 3 2 -6 1.04 0.55
 -3 2 6 2.54 0.66
 -3 2 6 2.2 0.82
 2 -2 -6 5.61 1.06
 2 -2 -6 6.79 1
 -2 -2 6 7.1 0.81
 -2 -2 6 7 1.05
 2 -2 -6 7.29 1.12
 -2 2 6 6.61 1.21
 2 2 -6 7.79 1.06
 2 2 -6 7.04 0.93
 -2 2 6 6.88 0.97
 2 2 -6 8.94 1.27
 -2 2 6 6.45 0.95
 2 2 -6 5.82 0.95
 -1 -2 6 99.9 3.85
 1 -2 -6 87.58 3.76
 1 -2 -6 105.47 4.35
 1 -2 -6 95.65 4.11
 -1 2 6 94.06 4.44
 1 2 -6 104.24 4.07
 -1 2 6 104.33 4.05
 -1 2 6 99.86 3.82
 1 2 -6 99.93 3.39
 1 2 -6 96.02 3.71
 1 2 -6 103.01 4.24
 0 -2 -6 11.54 1.32
 0 -2 6 11.21 1.21
 0 -2 -6 10.13 1.4
 0 -2 -6 10 1.46
 0 2 6 8.54 1.22
 0 2 -6 9.3 1
 0 2 -6 8.13 1.2
 0 2 6 10.98 1.15
 0 2 -6 10.68 0.83
 -1 -2 -6 6.94 1.28
 1 -2 6 7.96 0.98
 -1 -2 -6 6.72 1.28
 -1 -2 -6 9.16 1.22
 1 2 6 5.18 0.83
 1 2 6 7.88 1.25
 -1 2 -6 10.86 1.46
 -1 2 -6 8.88 0.9
 -1 2 -6 5.45 0.83
 -2 -2 -6 13.51 1.82
 2 -2 6 15.28 1.11
 -2 -2 -6 11.76 1.74
 -2 -2 -6 14.07 1.48
 2 2 6 14.14 1.12
 2 2 6 13.69 1.66
 -2 2 -6 12.7 1.66
 -2 2 -6 16.02 0.95
 -3 -2 -6 21.71 1.55
 -3 -2 -6 24.23 2.59
 -3 -2 -6 22.82 2.67
 3 -2 6 21.6 1.3
 -3 2 -6 24.39 2.7
 -3 2 -6 24.18 0.99
 3 2 6 21.18 1.41
 -3 2 -6 26.74 2.09
 -4 -2 -6 0.39 0.57
 -4 -2 -6 1.53 0.94
 4 -2 6 0.62 0.31
 4 2 6 1.71 0.71
 -4 2 -6 0.87 0.86
 -4 2 -6 0.92 0.76
 -4 2 -6 0.51 0.57
 4 2 6 0.54 0.36
 -5 -2 -6 1.51 1.08
 -5 -2 -6 1.47 0.83
 5 2 6 1.3 0.52
 -5 2 -6 1 0.94
 -5 2 -6 0.54 0.92
 -5 2 -6 0.75 0.65
 -10 -3 6 0.06 0.86
 10 3 -6 0.07 0.65
 9 -3 -6 1.05 0.73
 9 -3 -6 0.13 0.52
 -9 -3 6 0.44 0.63
 -9 -3 6 -0.49 0.51
 -9 -3 6 1.07 1.2
 9 3 -6 0.54 0.6
 -9 3 6 1.37 0.78
 -9 3 6 0.7 1.03
 -8 -3 6 9.61 1.84
 -8 -3 6 8.99 1.59
 8 -3 -6 6.96 1.31
 -8 -3 6 10 2.08
 8 -3 -6 8.01 1.28
 -8 3 6 8.32 1.36
 -8 3 6 10.9 0.78
 8 3 -6 8.73 0.94
 8 3 -6 9.71 1.57
 -8 3 6 7.99 1.28
 -8 3 6 8.19 1.99
 7 -3 -6 1.69 0.62
 -7 -3 6 1.36 0.7
 -7 -3 6 2.72 1.19
 -7 -3 6 1.94 0.89
 7 -3 -6 2.56 0.81
 7 3 -6 2.39 0.67
 7 3 -6 2.84 0.91
 -7 3 6 1.86 0.75
 -7 3 6 2.03 1.05
 -7 3 6 1.83 0.68
 -7 3 6 1.77 0.4
 6 -3 -6 3.89 0.87
 -6 -3 6 4.55 1.29
 6 -3 -6 4.65 0.92
 -6 -3 6 3.71 1
 -6 -3 6 5.43 1.33
 6 -3 -6 2.7 1.22
 6 -3 -6 2.52 0.73
 -6 3 6 4.77 1.37
 6 3 -6 3.4 1.13
 -6 3 6 4.53 0.68
 6 3 -6 3.22 0.88
 6 3 -6 4.34 1.01
 -6 3 6 4 0.88
 6 3 -6 1.95 1.03
 -5 -3 6 7.68 1.42
 5 -3 -6 8.1 1.69
 5 -3 -6 7.25 1.19
 5 -3 -6 7.73 1.21
 5 -3 -6 7.06 1.14
 -5 -3 6 9.3 1.57
 -5 -3 6 6.22 1.19
 5 3 -6 6.32 1.31
 -5 3 6 6.33 1.05
 -5 3 6 6.41 1.37
 -5 3 6 7.5 0.93
 5 3 -6 7.85 1.29
 5 3 -6 8.62 1.66
 4 -3 -6 48.38 3.07
 4 -3 -6 39.84 2.41
 -4 -3 6 48.36 2.83
 4 -3 -6 45.41 2.5
 -4 -3 6 40.67 2.55
 4 -3 -6 41.58 2.28
 -4 -3 6 45.14 2.5
 -4 3 6 48.06 2.29
 4 3 -6 39.16 2.64
 -4 3 6 42.91 2.39
 4 3 -6 46.41 2.9
 4 3 -6 44.74 2.59
 -4 3 6 54.47 3.26
 -3 -3 6 29.09 2.06
 3 -3 -6 26.35 1.85
 3 -3 -6 27.32 1.77
 -3 -3 6 27.16 1.95
 3 -3 -6 24.55 1.86
 3 -3 -6 30.64 2.27
 -3 -3 6 30.1 1.59
 3 3 -6 27.68 1.91
 -3 3 6 28.77 1.84
 -3 3 6 29.44 2.3
 3 3 -6 29.05 2.13
 -3 3 6 30.4 1.84
 3 3 -6 27.87 1.83
 2 -3 -6 65.03 3.33
 2 -3 -6 65.83 3.18
 -2 -3 6 68.26 3.23
 2 -3 -6 67.23 3.51
 -2 -3 6 70.56 2.34
 2 3 -6 66.33 3.38
 -2 3 6 75.46 3.26
 2 3 -6 69.66 2.64
 2 3 -6 68.92 3.15
 -2 3 6 69.16 3.1
 -2 3 6 67.99 3.71
 1 -3 -6 37.62 2.53
 1 -3 -6 41.57 2.36
 1 -3 -6 37.94 2.47
 -1 -3 6 40.98 2.29
 1 3 -6 37.26 1.4
 -1 3 6 43.81 2.43
 -1 3 6 41.19 2.83
 1 3 -6 43.6 2.21
 -1 3 6 43.22 2.26
 1 3 -6 42.17 2.48
 0 -3 -6 34.51 2.44
 0 -3 -6 42.02 2.71
 0 -3 -6 37.18 2.25
 0 -3 6 39.78 2.16
 0 3 -6 38.96 2.41
 0 3 -6 42.42 1.51
 0 3 6 45.62 2.3
 0 3 -6 42.42 2.09
 0 3 6 45.42 2.55
 0 3 -6 38.61 1.67
 -1 -3 -6 23.27 2.02
 -1 -3 -6 23.85 2.12
 1 -3 6 25.95 1.64
 -1 -3 -6 22.53 1.73
 -1 3 -6 25.13 1.42
 -1 3 -6 22.82 1.56
 -1 3 -6 23.31 1.31
 -1 3 -6 27.98 1.99
 1 3 6 23.7 1.61
 1 3 6 25.55 1.93
 -2 -3 -6 40.06 2.9
 -2 -3 -6 44.3 2.49
 -2 -3 -6 39.45 2.8
 -2 -3 -6 39.43 2.95
 2 -3 6 41.05 2.08
 -2 3 -6 42.86 1.76
 -2 3 -6 39.7 2.48
 2 3 6 39.46 2.15
 -2 3 -6 39.06 2.54
 -3 -3 -6 0.33 0.55
 3 -3 6 1.83 0.51
 -3 -3 -6 1.53 0.62
 -3 -3 -6 2.71 1.08
 3 3 6 1.19 0.51
 -3 3 -6 1.39 0.7
 3 3 6 2.06 0.69
 -3 3 -6 1.67 0.79
 -3 3 -6 2.19 0.34
 -3 3 -6 1.68 0.37
 4 -3 6 5.96 0.77
 -4 -3 -6 4.31 1.42
 -4 -3 -6 5.77 1.37
 -4 3 -6 3.6 1.18
 -4 3 -6 5.93 1.25
 -5 -3 -6 0.23 0.7
 -5 -3 -6 0.31 0.82
 -5 3 -6 -0.25 0.56
 -5 3 -6 0.97 0.7
 -5 3 -6 0.76 0.96
 -9 -4 6 0.87 0.91
 9 -4 -6 0.57 0.53
 -9 -4 6 0.83 1.03
 -9 -4 6 0.49 0.62
 -9 4 6 0.26 0.81
 9 4 -6 1.02 0.71
 -9 4 6 1.32 0.64
 -8 -4 6 2.47 1.28
 8 -4 -6 3.51 0.94
 -8 -4 6 2.47 0.93
 8 -4 -6 1.55 0.7
 -8 -4 6 0.86 0.79
 -8 4 6 2.06 1.18
 -8 4 6 2.96 0.78
 8 4 -6 2.28 0.88
 -8 4 6 2.33 0.81
 -7 -4 6 12.92 2.25
 -7 -4 6 11.82 1.94
 7 -4 -6 9.84 1.4
 7 -4 -6 10.6 1.48
 7 -4 -6 11.54 1.55
 -7 -4 6 8.04 1.54
 -7 4 6 11.98 1.03
 7 4 -6 11.41 1.73
 -7 4 6 13.86 1.67
 7 4 -6 10.9 1.48
 -7 4 6 13.74 2.44
 6 -4 -6 16.23 1.84
 6 -4 -6 15.66 1.84
 -6 -4 6 13.83 1.83
 6 -4 -6 14.42 1.54
 -6 -4 6 13.61 2.1
 -6 -4 6 13.39 1.95
 6 4 -6 14.36 1.83
 -6 4 6 16.01 1.77
 -6 4 6 17.75 2.52
 -6 4 6 17.66 1.33
 6 4 -6 19.83 2.2
 5 -4 -6 4.9 0.86
 -5 -4 6 7.11 1.43
 5 -4 -6 7.02 1.29
 -5 -4 6 6.6 1.27
 -5 -4 6 5.06 1.18
 5 -4 -6 4.14 1.25
 5 -4 -6 5.25 1.1
 -5 4 6 6.21 1.4
 5 4 -6 3.73 0.98
 -5 4 6 7.48 1.1
 -5 4 6 7.3 1.19
 5 4 -6 6.76 1.43
 5 4 -6 5.29 1.23
 -4 -4 6 58.17 2.93
 4 -4 -6 55.86 3.15
 4 -4 -6 56.78 2.68
 4 -4 -6 55.9 3.03
 -4 -4 6 61.12 3.26
 4 -4 -6 54.78 3.47
 -4 -4 6 55.95 3.22
 -4 4 6 58.29 3.58
 4 4 -6 58.5 3.16
 4 4 -6 57.66 3.4
 -4 4 6 56.36 2.88
 -4 4 6 56.09 2.82
 -3 -4 6 4.84 1.07
 -3 -4 6 2.6 0.54
 -3 -4 6 3.83 0.94
 3 -4 -6 2.87 0.9
 3 -4 -6 2.14 0.72
 3 -4 -6 4.66 1.08
 -3 4 6 3.42 1.11
 3 4 -6 3.54 0.97
 3 4 -6 1.81 0.71
 -3 4 6 2.63 0.73
 -3 4 6 3.21 0.81
 2 -4 -6 5.94 1.24
 2 -4 -6 3.73 1.04
 2 -4 -6 4.49 0.99
 -2 -4 6 4.26 0.93
 -2 4 6 6.6 1.41
 -2 4 6 4.4 0.97
 -2 4 6 5.43 0.99
 2 4 -6 6.11 1.09
 2 4 -6 4.33 1.04
 1 -4 -6 0.01 0.43
 -1 -4 6 0.16 0.34
 1 -4 -6 -0.53 0.38
 1 -4 -6 0.48 0.41
 1 4 -6 0.45 0.45
 -1 4 6 0.82 0.7
 -1 4 6 -0.07 0.35
 -1 4 6 0.35 0.39
 1 4 -6 0.2 0.42
 0 -4 -6 84.49 3.99
 0 -4 -6 93.22 4.52
 0 -4 -6 85.79 4.34
 0 -4 6 86.76 3.78
 0 4 -6 90.5 3.62
 0 4 -6 83.6 3.93
 0 4 6 87.64 3.81
 0 4 6 93.62 4.2
 -1 -4 -6 17.17 1.95
 -1 -4 -6 14.47 2.02
 -1 -4 -6 16.78 2.13
 1 -4 6 17.72 1.45
 -1 -4 -6 15.85 2.15
 -1 4 -6 17.57 0.92
 -1 4 -6 18.35 0.88
 1 4 6 20.64 1.62
 1 4 6 16.58 2.24
 -1 4 -6 15.89 1.23
 -1 4 -6 18.37 1.64
 -2 -4 -6 15.22 2.09
 -2 -4 -6 14.75 2.22
 -2 -4 -6 16.01 1.88
 2 -4 6 16.8 1.37
 2 4 6 17.13 2.02
 -2 4 -6 18.84 1.17
 -2 4 -6 18.75 1.46
 -3 -4 -6 -0.74 0.4
 3 -4 6 1.1 0.48
 -3 -4 -6 -0.06 0.53
 -3 -4 -6 0.72 0.57
 -3 4 -6 0.37 0.23
 -3 4 -6 -0.47 0.5
 -3 4 -6 0.12 0.31
 -3 4 -6 0.9 0.69
 3 4 6 0.12 0.55
 -4 -4 -6 6.66 1.75
 4 -4 6 7 0.93
 -4 -4 -6 5.95 1.53
 -4 4 -6 9.24 1.59
 -4 4 -6 4.51 1.2
 -5 -4 -6 2.73 1.11
 -5 4 -6 0.93 0.82
 -5 4 -6 0.71 0.68
 -5 4 -6 1.74 1.07
 -9 -5 6 0.18 0.9
 9 5 -6 0.17 0.69
 -8 -5 6 11.76 2.12
 8 -5 -6 5.25 1.16
 -8 -5 6 6.06 1.83
 -8 -5 6 6.42 1.43
 -8 5 6 6.47 1.2
 8 5 -6 6.71 1.46
 -8 5 6 5.94 1.69
 7 -5 -6 2.28 0.85
 -7 -5 6 0.72 0.71
 7 -5 -6 0.94 0.54
 -7 -5 6 0.43 0.62
 -7 -5 6 0.26 0.73
 7 -5 -6 1.38 0.68
 7 5 -6 1.21 0.77
 -7 5 6 2.18 1.09
 -7 5 6 1.44 0.69
 7 5 -6 1.66 0.73
 -7 5 6 0.96 0.52
 6 -5 -6 0.81 0.63
 -6 -5 6 1.25 0.68
 6 -5 -6 0.29 0.57
 -6 -5 6 0.95 0.79
 6 -5 -6 0.44 0.42
 -6 -5 6 -0.33 0.5
 -6 5 6 0.33 0.62
 -6 5 6 1.02 0.6
 -6 5 6 0.79 0.48
 6 5 -6 0.39 0.61
 6 5 -6 0.48 0.67
 5 -5 -6 37.87 2.74
 5 -5 -6 40.16 2.14
 5 -5 -6 40.35 2.64
 -5 -5 6 42.75 2.93
 -5 -5 6 34.85 2.64
 -5 -5 6 46.33 2.98
 5 5 -6 45.88 3.25
 -5 5 6 50.6 3.54
 -5 5 6 44.91 2.64
 -5 5 6 47.23 2.69
 5 5 -6 48.23 3.05
 4 -5 -6 19.76 2.35
 4 -5 -6 18.24 1.39
 4 -5 -6 22.11 2.58
 -4 -5 6 21.49 2.32
 4 -5 -6 22.74 1.92
 -4 -5 6 18.03 2.15
 -4 -5 6 20.58 1.69
 4 5 -6 21.57 2.5
 -4 5 6 26.7 2.46
 4 5 -6 22.45 1.97
 -4 5 6 19.92 1.76
 -4 5 6 24.28 1.86
 3 -5 -6 10.48 1.72
 3 -5 -6 8.24 1.39
 -3 -5 6 9.62 1.54
 -3 -5 6 13.43 1.76
 3 -5 -6 9.13 1.58
 -3 -5 6 11.25 0.94
 -3 5 6 14.62 2.15
 3 5 -6 9.03 1.56
 -3 5 6 13.54 1.64
 -3 5 6 9.97 1.45
 3 5 -6 11.75 1.67
 -2 -5 6 0 0.35
 2 -5 -6 0.66 0.55
 -2 -5 6 0.66 0.48
 2 -5 -6 1.65 0.75
 2 -5 -6 1.53 0.77
 2 5 -6 0.43 0.53
 2 5 -6 0.81 0.56
 -2 5 6 0.12 0.42
 -2 5 6 1.69 0.62
 -2 5 6 0.3 0.67
 1 -5 -6 45.91 3.16
 1 -5 -6 50.22 3.03
 -1 -5 6 52.58 2.92
 1 -5 -6 50.5 3.27
 1 5 -6 52.53 3.03
 -1 5 6 55.04 3.22
 1 5 -6 58.28 2.99
 -1 5 6 57.85 3.03
 0 -5 -6 75.46 3.87
 0 -5 -6 65.82 3.59
 0 -5 -6 63.62 3.88
 0 -5 6 65.37 3.34
 0 -5 -6 71.47 4.51
 0 5 -6 72.9 3.62
 0 5 -6 72.96 3.32
 -1 -5 -6 15.45 2.14
 -1 -5 -6 11.93 1.96
 -1 -5 -6 14.29 1.9
 1 -5 6 18.74 1.6
 1 5 6 19.44 2.25
 -1 5 -6 15.57 1.3
 -1 5 -6 17.66 1.92
 2 -5 6 17.47 1.5
 -2 -5 -6 11.58 1.99
 -2 -5 -6 12.84 2.12
 -2 -5 -6 14 1.91
 -2 5 -6 16.06 1.2
 -2 5 -6 13.93 1.66
 -2 5 -6 16.68 1.07
 2 5 6 16.48 2.15
 -2 5 -6 14.09 1.6
 3 -5 6 2.34 0.71
 -3 -5 -6 3.19 1.3
 -3 -5 -6 2.09 0.83
 -3 -5 -6 1.25 0.82
 3 5 6 1.87 0.86
 -3 5 -6 2.22 0.48
 -3 5 -6 1.54 0.63
 4 -5 6 6.94 1.02
 -4 -5 -6 7.66 1.71
 -4 -5 -6 7.52 1.87
 -4 5 -6 8.37 1.57
 8 -6 -6 0.5 0.61
 -8 -6 6 1.68 1.1
 -8 -6 6 -0.04 0.81
 -8 6 6 3.46 1.38
 8 6 -6 0.67 0.78
 -7 -6 6 2.94 1.19
 7 -6 -6 5.95 1.34
 -7 -6 6 6.61 1.67
 7 6 -6 8.25 1.58
 -7 6 6 7.69 1.3
 -7 6 6 4.49 1.05
 7 6 -6 6.61 1.49
 -7 6 6 7.66 1.94
 6 -6 -6 8.97 1.12
 -6 -6 6 8.24 1.65
 6 -6 -6 7.71 1.63
 -6 -6 6 7.83 1.72
 6 -6 -6 7.34 1.39
 -6 6 6 11.05 1.57
 6 6 -6 7.57 1.58
 6 6 -6 6.23 1.37
 -6 6 6 7.78 1.78
 -6 6 6 7.68 1.32
 5 -6 -6 20.27 1.41
 5 -6 -6 19.52 2.48
 -5 -6 6 23.18 2.61
 5 -6 -6 21.1 2.31
 -5 -6 6 21.88 2.47
 -5 6 6 26.37 2.13
 -5 6 6 26.21 2.04
 -5 6 6 29.13 3.33
 5 6 -6 26.05 2.76
 5 6 -6 26.39 3.1
 -4 -6 6 13.54 1.86
 4 -6 -6 11.11 1.24
 -4 -6 6 10.83 1.47
 4 -6 -6 13.74 2.13
 4 -6 -6 13.36 1.87
 -4 6 6 10.66 2.01
 -4 6 6 12.5 1.68
 4 6 -6 11.39 2.08
 4 6 -6 14.25 1.98
 -4 6 6 13.87 1.87
 3 -6 -6 7.13 1.41
 3 -6 -6 8.33 1.65
 -3 -6 6 8.51 0.99
 -3 -6 6 8.64 1.49
 3 6 -6 7.48 1.41
 3 6 -6 10.61 1.74
 -3 6 6 8.43 1.46
 -3 6 6 10.28 1.93
 -3 6 6 7.74 1.32
 2 -6 -6 5.27 1.32
 -2 -6 6 9.05 1.41
 2 -6 -6 6.15 1.37
 -2 6 6 6.97 1.42
 2 6 -6 4.02 1.07
 -2 6 6 4.55 1.36
 2 6 -6 6.79 1.3
 1 -6 -6 46.55 3.04
 1 -6 -6 46.5 2.86
 1 -6 -6 38.93 3.12
 1 6 -6 51.18 3.08
 1 6 -6 53.27 3.02
 0 -6 -6 10.01 1.89
 0 -6 -6 11.92 1.92
 0 -6 -6 12.49 1.88
 0 6 -6 13.03 1.62
 0 6 6 13.71 2.03
 0 6 -6 12.48 1.66
 -1 -6 -6 7.59 1.63
 -1 -6 -6 8.2 1.61
 -1 -6 -6 10.29 1.68
 1 6 6 11.53 1.91
 -1 6 -6 7.77 1.4
 -1 6 -6 10.5 1.5
 -1 6 -6 13.12 1.52
 -2 -6 -6 1.33 0.94
 -2 -6 -6 2.4 1.12
 -2 -6 -6 3.65 1.11
 -2 6 -6 1.62 0.57
 2 6 6 3.5 1.13
 -2 6 -6 1.67 0.71
 -3 -6 -6 0.59 0.69
 -3 -6 -6 0.79 0.92
 -3 -6 -6 -0.03 0.76
 -3 6 -6 0.22 0.34
 -3 6 -6 -0.05 0.5
 3 6 6 0.18 0.56
 -4 -6 -6 10.52 2.19
 -4 -6 -6 7.43 2.05
 -7 -7 6 5.53 1.68
 -7 -7 6 2.9 1.18
 7 -7 -6 5.26 1.29
 7 7 -6 3.52 1.22
 -7 7 6 6.94 1.31
 -7 7 6 6.96 1.77
 7 7 -6 5.55 1.49
 -6 -7 6 0.74 0.8
 -6 -7 6 0.38 0.64
 6 -7 -6 -0.33 0.45
 6 -7 -6 0.59 0.87
 -6 7 6 -0.2 0.7
 -6 7 6 0.58 0.62
 6 7 -6 1.08 1.01
 -6 7 6 1.08 0.78
 6 7 -6 0.2 0.6
 -5 -7 6 2.37 0.96
 5 -7 -6 2.67 0.63
 -5 -7 6 3.08 1.06
 5 -7 -6 1.87 0.85
 5 -7 -6 3.56 1.29
 -5 7 6 6.05 1.3
 -5 7 6 3.91 1.39
 5 7 -6 4.32 1.23
 -5 7 6 5.23 1.26
 5 7 -6 4.91 1.72
 -4 -7 6 2.7 1.02
 4 -7 -6 2.95 0.64
 4 -7 -6 2.74 1.01
 4 -7 -6 3.15 1.27
 -4 -7 6 3.91 0.96
 4 7 -6 4.45 1.18
 -4 7 6 4.16 1.36
 -4 7 6 3.95 1.26
 -3 -7 6 2.77 0.66
 3 -7 -6 5.33 1.37
 3 -7 -6 2.22 0.69
 -3 -7 6 2.21 0.48
 -3 -7 6 1.91 0.79
 3 -7 -6 3.81 1.31
 3 7 -6 3.02 1
 -3 7 6 4.28 1.5
 -3 7 6 1.55 0.9
 2 -7 -6 4.74 1.25
 2 -7 -6 2.72 1.15
 2 -7 -6 2.61 0.78
 -2 -7 6 5.11 1.08
 2 7 -6 2.64 0.95
 -2 7 6 5.6 1.6
 2 7 -6 3.83 1.16
 -2 7 6 4.27 1.27
 1 -7 -6 22.1 2.61
 1 -7 -6 16.58 2.51
 1 -7 -6 16.69 2.04
 -1 7 6 20.77 2.79
 1 7 -6 21.18 2.37
 1 7 -6 23.94 2.53
 0 -7 -6 21.33 2.42
 0 -7 -6 21.66 2.55
 0 -7 -6 19.05 2.7
 0 7 6 33.11 3.4
 0 7 -6 24.69 2.13
 0 7 -6 22.52 1.99
 -1 -7 -6 1.55 0.92
 -1 -7 -6 1.26 0.76
 -1 -7 -6 1.85 1.11
 -1 7 -6 0.16 0.5
 1 7 6 0.41 0.82
 -1 7 -6 1.1 0.64
 -2 -7 -6 10.05 2.01
 -2 -7 -6 9.55 2.08
 -2 -7 -6 8.86 1.72
 -2 7 -6 13.02 1.51
 2 7 6 11.12 1.96
 -2 7 -6 12.5 1.69
 -3 -7 -6 7.75 1.86
 -3 -7 -6 5.41 1.37
 -3 -7 -6 3.7 1.48
 3 7 6 5.21 1.54
 -3 7 -6 8.35 1.1
 -6 -8 6 1.21 0.91
 6 -8 -6 0.84 0.82
 -6 -8 6 1.83 1.17
 6 -8 -6 1.09 1.08
 6 8 -6 1.78 1.06
 -6 8 6 1.97 1.03
 -6 8 6 1.58 1
 -5 -8 6 5.05 1.35
 -5 -8 6 2.09 0.98
 5 -8 -6 5.12 1.68
 5 -8 -6 4.52 1.32
 5 8 -6 3.6 1.33
 -5 8 6 3.48 1.37
 -5 8 6 4.01 1.32
 -4 -8 6 9.02 1.67
 4 -8 -6 6.63 1.85
 4 -8 -6 8.3 1.69
 4 -8 -6 7.75 1.08
 -4 -8 6 5.41 1.22
 -4 8 6 6.36 1.58
 -4 8 6 12.02 2.37
 4 8 -6 8.28 1.74
 3 -8 -6 5.54 1.42
 3 -8 -6 8.11 1.92
 3 -8 -6 4.82 1.01
 -3 -8 6 5.2 1.23
 -3 8 6 5.6 1.62
 -3 8 6 10.21 1.97
 3 8 -6 6.13 1.45
 2 -8 -6 6.44 1.46
 -2 -8 6 7.08 1.33
 2 -8 -6 7.02 1.74
 2 -8 -6 2.9 0.9
 2 8 -6 7.89 1.59
 -2 8 6 6.45 1.62
 -2 8 6 6.17 1.73
 1 -8 -6 8.24 1.95
 1 -8 -6 6.45 1.35
 1 -8 -6 6.9 1.56
 1 8 -6 9.09 1.58
 1 8 -6 9.08 1.64
 -1 8 6 6.28 1.69
 0 -8 -6 12.67 2.37
 0 -8 -6 10.46 1.76
 0 -8 -6 9.84 1.91
 0 8 -6 13.14 1.86
 0 8 -6 15.35 2.05
 0 8 6 15.7 2.46
 -1 -8 -6 4.35 1.22
 -1 -8 -6 6.86 1.56
 -1 -8 -6 4.91 1.59
 1 8 6 3.85 1.39
 -1 8 -6 6.13 1.26
 -1 8 -6 3.49 1.04
 -2 -8 -6 1.81 1.13
 -2 8 -6 5.01 1.07
 2 8 6 3.19 1.35
 4 -9 -6 -0.12 0.83
 4 -9 -6 2.58 1.14
 -4 -9 6 1.54 0.93
 -4 9 6 0.44 0.89
 4 9 -6 1.03 0.87
 -4 9 6 1.3 1.19
 3 -9 -6 0.16 0.67
 3 -9 -6 0.06 0.72
 -3 -9 6 -0.15 0.6
 3 9 -6 0.24 0.68
 -3 9 6 0.57 0.9
 -3 9 6 0.05 0.83
 2 -9 -6 6.18 1.6
 -2 -9 6 7.9 1.47
 2 -9 -6 4.06 1.09
 2 -9 -6 5.1 1.69
 -2 9 6 7.96 1.91
 2 9 -6 5.56 1.45
 1 -9 -6 4.7 1.57
 1 -9 -6 4.43 1.18
 1 -9 -6 3.48 1.25
 -1 9 6 9.36 2.08
 1 9 -6 5.96 1.4
 0 -9 -6 1.8 0.92
 0 9 6 0.45 0.87
 0 9 -6 1.15 0.76
 -10 0 7 0.84 0.68
 10 0 -7 1.68 0.85
 -10 0 7 -0.25 0.9
 -9 0 7 8.05 1.46
 -9 0 7 6.46 1.53
 9 0 -7 8.32 1.39
 -9 0 7 7.82 2.02
 -8 0 7 1.44 0.87
 8 0 -7 1.02 0.65
 -8 0 7 2.01 1.09
 -8 0 7 1.15 0.65
 7 0 -7 32.83 2.61
 -7 0 7 33.69 2.92
 7 0 -7 27.99 2.06
 7 0 -7 32.61 1.37
 -7 0 7 28.91 2.33
 -7 0 7 27.91 2.14
 7 0 -7 24.85 3.23
 6 0 -7 1.06 0.64
 6 0 -7 0.21 0.26
 -6 0 7 0.06 0.57
 6 0 -7 -0.03 0.31
 6 0 -7 -0.14 0.59
 -6 0 7 0.35 0.5
 -6 0 7 0.5 0.45
 -5 0 7 20.54 1.68
 -5 0 7 21.23 1.86
 -5 0 7 22.31 1.97
 5 0 -7 18.64 2.41
 5 0 -7 21.61 1.68
 5 0 -7 20.09 2.16
 5 0 -7 23.12 1.39
 4 0 -7 0.3 0.46
 -4 0 7 0.54 0.39
 4 0 -7 0.15 0.37
 4 0 -7 1.28 0.49
 4 0 -7 1.1 0.66
 -4 0 7 2.31 0.73
 3 0 -7 1.44 0.67
 3 0 -7 1.14 0.48
 3 0 -7 0.75 0.43
 3 0 -7 0.98 0.58
 -3 0 7 1.75 0.61
 -3 0 7 0.78 0.52
 -2 0 7 15.7 1.43
 2 0 -7 18.25 1.46
 -2 0 7 17.89 1.42
 2 0 -7 16.8 1.86
 2 0 -7 16.77 1.32
 2 0 -7 18.18 1.49
 1 0 -7 2.45 0.6
 1 0 -7 1.2 0.56
 1 0 -7 2.31 0.68
 -1 0 7 2.24 0.64
 0 0 -7 2.29 0.68
 0 0 7 1.65 0.53
 1 0 7 2.58 0.6
 -1 0 -7 2.95 0.78
 -1 0 -7 2.72 0.62
 -1 0 -7 1.57 0.68
 -2 0 -7 51.82 3.08
 -2 0 -7 48.9 2.95
 2 0 7 48.91 2.23
 -2 0 -7 48.92 2.26
 -3 0 -7 1.17 0.68
 -3 0 -7 3.84 0.63
 3 0 7 2.34 0.55
 -4 0 -7 -0.35 0.55
 -4 0 -7 -0.13 0.38
 4 0 7 -0.11 0.26
 -5 0 -7 3.42 1.25
 -5 0 -7 2.68 1.03
 -5 0 -7 0.94 1.14
 -10 -1 7 0.06 0.94
 10 -1 -7 0.23 0.49
 -10 -1 7 0.41 0.74
 10 1 -7 0.24 0.59
 -10 1 7 -0.35 0.94
 -10 1 7 0.8 0.73
 -9 -1 7 0.25 0.62
 9 -1 -7 0.68 0.58
 -9 -1 7 1.27 0.77
 -9 -1 7 0.96 1.07
 -9 1 7 -0.33 0.83
 -9 1 7 0.13 0.48
 9 1 -7 -0.56 0.4
 -9 1 7 0.83 0.77
 -8 -1 7 18.52 2.36
 8 -1 -7 18.49 2.35
 -8 -1 7 22.22 3.08
 -8 -1 7 24.27 2.5
 8 -1 -7 18.79 1.95
 8 1 -7 20.27 2.13
 -8 1 7 26.81 3.31
 -8 1 7 26.05 2.21
 -8 1 7 24.25 2
 7 -1 -7 21.36 1.18
 -7 -1 7 22.51 1.93
 7 -1 -7 17.86 2.17
 -7 -1 7 23.72 2.59
 7 -1 -7 19.95 1.7
 -7 -1 7 21.87 2.82
 -7 1 7 19.38 2.17
 7 1 -7 22.07 1.84
 -7 1 7 23.51 2.93
 7 1 -7 21.04 3
 -7 1 7 19.74 2.07
 7 1 -7 22.58 1.1
 -6 -1 7 12.78 1.98
 6 -1 -7 12.04 1.01
 6 -1 -7 10.73 2.06
 -6 -1 7 13.46 1.85
 6 -1 -7 13.5 1.79
 -6 -1 7 10.05 1.51
 6 -1 -7 10.78 1.45
 -6 1 7 16.33 2.27
 6 1 -7 12.98 1.81
 -6 1 7 13.93 1.78
 -6 1 7 12.47 1.6
 6 1 -7 10.53 0.85
 6 1 -7 14.28 1.68
 6 1 -7 6.21 1.51
 5 -1 -7 15.25 1.2
 -5 -1 7 12.64 1.61
 5 -1 -7 9.9 1.72
 5 -1 -7 13.26 1.63
 -5 -1 7 17.48 2.03
 5 -1 -7 16.44 1.71
 -5 -1 7 20.28 2.13
 5 1 -7 13.8 1.6
 5 1 -7 13.53 1.78
 -5 1 7 15.16 1.67
 5 1 -7 14.69 1.08
 5 1 -7 13.27 2.04
 -5 1 7 15.68 2.05
 -4 -1 7 65.24 3.19
 4 -1 -7 68.54 3.13
 -4 -1 7 66.42 3.21
 4 -1 -7 65.39 3.62
 4 -1 -7 63.03 3.23
 4 -1 -7 61.84 2.86
 4 1 -7 60.78 3.35
 -4 1 7 69.17 3.55
 4 1 -7 69.91 2.86
 4 1 -7 72.3 3.23
 4 1 -7 62.34 3.48
 -4 1 7 63.36 3.1
 -4 1 7 65.68 2.74
 3 -1 -7 5.4 0.96
 3 -1 -7 4.56 1.04
 3 -1 -7 3.78 0.88
 3 -1 -7 3.73 0.8
 -3 -1 7 4.25 0.89
 -3 -1 7 4.56 0.85
 -3 1 7 4.91 0.81
 -3 1 7 6.01 0.98
 3 1 -7 6.19 0.97
 -3 1 7 6.27 1.16
 3 1 -7 2.41 0.67
 3 1 -7 4.27 0.94
 3 1 -7 3.07 0.86
 -2 -1 7 20.33 1.48
 2 -1 -7 21.56 1.73
 2 -1 -7 20.33 1.6
 -2 -1 7 19.29 1.49
 2 -1 -7 19.3 1.47
 2 1 -7 20.52 1.58
 -2 1 7 22.25 1.85
 2 1 -7 18.47 2
 -2 1 7 22.3 1.55
 2 1 -7 20.96 1.49
 -2 1 7 22.04 1.54
 2 1 -7 21.51 1.54
 1 -1 -7 30.44 2.07
 -1 -1 7 31.24 1.85
 1 -1 -7 28.17 2.02
 1 -1 -7 28.1 1.79
 1 1 -7 30.11 1.75
 1 1 -7 31.55 1.8
 1 1 -7 29.15 1.98
 -1 1 7 30.46 1.94
 -1 1 7 30.84 1.82
 0 -1 -7 18.03 1.98
 0 -1 7 15.59 1.25
 0 -1 -7 17.07 1.93
 0 -1 -7 15.24 1.27
 0 1 -7 18.51 1.39
 0 1 -7 19.7 2.03
 0 1 7 18.02 1.3
 0 1 7 14.04 1.6
 0 1 -7 13.92 1.14
 -1 -1 -7 0.08 0.43
 -1 -1 -7 0.72 0.43
 1 -1 7 0.08 0.28
 -1 -1 -7 -0.1 0.4
 -1 1 -7 0.06 0.26
 1 1 7 0.29 0.45
 -1 1 -7 0.07 0.39
 1 1 7 0.43 0.36
 -1 1 -7 0.35 0.5
 -2 -1 -7 7.22 1.01
 2 -1 7 6.98 0.9
 -2 -1 -7 3.72 1.01
 -2 -1 -7 4.77 1.16
 -2 1 -7 6.09 1.22
 2 1 7 7.41 0.95
 -2 1 -7 5.15 0.74
 3 -1 7 0.31 0.31
 -3 -1 -7 2.23 0.98
 -3 -1 -7 1.1 0.73
 -3 -1 -7 1.07 0.48
 -3 1 -7 0.89 0.7
 -3 1 -7 0.51 0.3
 3 1 7 0.93 0.4
 -4 -1 -7 3.21 1.09
 -4 -1 -7 2.59 1.17
 4 -1 7 2.92 0.56
 -4 1 -7 1.83 0.86
 -4 1 -7 6.5 1.72
 4 1 7 3.87 0.67
 -4 1 -7 4.6 1.36
 -5 -1 -7 0.5 0.64
 -5 -1 -7 0.59 0.96
 -5 1 -7 -1.06 0.91
 -5 1 -7 0.36 0.62
 -5 1 -7 0.54 0.78
 -10 -2 7 6.31 1.62
 10 -2 -7 3.35 1.1
 -10 -2 7 1.36 1.23
 10 2 -7 3.72 1.15
 -10 2 7 4.38 1.26
 -9 -2 7 5.66 1.31
 -9 -2 7 6.48 1.96
 -9 -2 7 8.71 1.7
 9 -2 -7 8.28 1.45
 -9 2 7 8.69 2.14
 -9 2 7 8.95 1.53
 -9 2 7 6.94 1.33
 9 2 -7 8.02 1.47
 -8 -2 7 4.73 1.31
 -8 -2 7 4.22 1.45
 8 -2 -7 2.64 0.95
 8 -2 -7 7.93 1.32
 -8 -2 7 5.03 1.21
 -8 2 7 5.26 1.22
 -8 2 7 4.89 1.61
 -8 2 7 8 1.35
 8 2 -7 3.36 1.02
 8 2 -7 5.69 0.46
 7 -2 -7 27.44 2.16
 -7 -2 7 20.1 2.66
 7 -2 -7 23.46 1.47
 7 -2 -7 29.5 2.06
 -7 -2 7 27.28 2.39
 -7 -2 7 21.73 2.38
 -7 2 7 25.78 2.02
 7 2 -7 22.81 1.61
 7 2 -7 19.3 2.83
 7 2 -7 26.28 1.3
 7 2 -7 29.06 2.17
 -7 2 7 27.97 2.05
 -7 2 7 31.2 2.85
 -6 -2 7 3.24 0.92
 6 -2 -7 1.2 0.66
 -6 -2 7 1.09 0.71
 -6 -2 7 0.16 0.6
 6 -2 -7 2.24 0.63
 6 -2 -7 1.36 0.91
 6 -2 -7 1.72 0.66
 6 2 -7 2.36 1.1
 -6 2 7 1.79 0.93
 6 2 -7 0.39 0.71
 6 2 -7 2.02 0.48
 6 2 -7 1.14 0.66
 -6 2 7 2.83 0.51
 -6 2 7 2.14 0.73
 5 -2 -7 2.3 0.99
 5 -2 -7 2.13 0.69
 -5 -2 7 2.02 0.72
 5 -2 -7 3.31 0.78
 5 -2 -7 2.49 0.71
 -5 -2 7 2.57 0.85
 -5 -2 7 2.47 0.83
 5 2 -7 2.7 0.59
 5 2 -7 1.58 0.78
 -5 2 7 3.88 0.67
 5 2 -7 1.91 0.74
 -5 2 7 4.6 0.99
 5 2 -7 1.78 0.87
 -5 2 7 2.79 0.95
 -4 -2 7 63.39 2.99
 -4 -2 7 60.67 3.33
 -4 -2 7 61.02 3.18
 4 -2 -7 61.96 2.98
 4 -2 -7 62.95 3.59
 4 -2 -7 56.06 2.99
 4 -2 -7 64.28 3.09
 -4 2 7 62.76 3.53
 4 2 -7 62.3 3.11
 4 2 -7 60.86 2.75
 4 2 -7 61.62 3.43
 -4 2 7 65.06 2.76
 -4 2 7 67.7 3.13
 4 2 -7 60.61 3.36
 3 -2 -7 7.85 1.21
 3 -2 -7 8.14 1.41
 3 -2 -7 6.7 1.13
 -3 -2 7 8.06 1.25
 -3 -2 7 10.43 1.15
 3 -2 -7 7.89 1.17
 3 2 -7 9.24 1.22
 3 2 -7 7.95 1.18
 3 2 -7 7.33 1.3
 3 2 -7 8.3 1.23
 -3 2 7 10.17 1.63
 -3 2 7 9.03 1.1
 -3 2 7 7.56 1.14
 -2 -2 7 14.59 1.59
 -2 -2 7 13.43 1.06
 2 -2 -7 14.83 1.7
 2 -2 -7 12.69 1.45
 2 -2 -7 15.07 1.83
 2 2 -7 12.26 1.11
 2 2 -7 15.13 1.55
 -2 2 7 15.56 1.96
 2 2 -7 16.19 1.89
 -2 2 7 15.21 1.3
 2 2 -7 13.72 1.54
 -2 2 7 14.23 1.28
 -1 -2 7 30.5 1.93
 1 -2 -7 30.04 2.17
 1 -2 -7 29.75 1.94
 1 -2 -7 27.48 2.11
 -1 2 7 31.14 1.86
 1 2 -7 25.45 2.01
 1 2 -7 27.17 1.94
 -1 2 7 26.29 1.88
 1 2 -7 31.96 1.61
 1 2 -7 32.67 1.83
 0 -2 -7 3.34 0.99
 0 -2 7 3.53 0.74
 0 -2 -7 3.5 0.8
 0 -2 -7 3.04 0.92
 0 2 7 2.81 0.82
 0 2 7 2.74 0.67
 0 2 -7 2.66 0.59
 0 2 -7 3.34 0.63
 0 2 -7 3.74 0.95
 -1 -2 -7 55.04 2.75
 -1 -2 -7 54.42 3.23
 1 -2 7 51.4 2.49
 -1 -2 -7 51.38 3.18
 -1 2 -7 53.45 3.04
 1 2 7 52.77 2.5
 -1 2 -7 51.22 2.5
 -1 2 -7 52.02 2.27
 -2 -2 -7 0.73 0.63
 2 -2 7 1.11 0.45
 -2 -2 -7 0.86 0.48
 -2 -2 -7 1.6 0.83
 2 2 7 1.53 0.56
 -2 2 -7 0.86 0.6
 -2 2 -7 1.51 0.42
 3 -2 7 1.62 0.51
 -3 -2 -7 1.37 0.79
 -3 -2 -7 0.54 0.68
 -3 -2 -7 1.48 0.55
 -3 2 -7 1.63 0.95
 -3 2 -7 0.88 0.65
 -3 2 -7 1.88 0.37
 -4 -2 -7 -0.28 0.53
 -4 -2 -7 0.52 0.69
 4 -2 7 0.17 0.29
 -4 2 -7 0.12 0.61
 -4 2 -7 0.53 0.79
 -9 -3 7 11.26 1.83
 9 -3 -7 10.36 1.72
 -9 -3 7 13.18 2.23
 -9 -3 7 10.49 2.34
 9 -3 -7 11.64 1.64
 -9 3 7 12.88 1.78
 -9 3 7 8.67 2.15
 9 3 -7 10.51 1.7
 -8 -3 7 5.39 1.59
 -8 -3 7 4.97 1.22
 8 -3 -7 5.38 1.15
 -8 -3 7 9.16 1.8
 8 -3 -7 5.31 1.22
 -8 3 7 6.94 1.87
 8 3 -7 8.8 1.55
 -8 3 7 6.7 1.26
 -8 3 7 5.9 1.18
 7 -3 -7 13.53 1.47
 -7 -3 7 15.08 2
 7 -3 -7 13.16 1.69
 -7 -3 7 12.11 2.14
 7 -3 -7 10.97 1.55
 -7 -3 7 17.08 2.26
 -7 3 7 9.7 1.47
 7 3 -7 11.59 2.26
 7 3 -7 12.2 1.56
 -7 3 7 13.57 0.93
 -7 3 7 12.74 2.22
 7 3 -7 11.19 1.64
 6 -3 -7 2.54 0.74
 6 -3 -7 2.53 0.76
 -6 -3 7 3.57 1.14
 -6 -3 7 3.34 1.08
 6 -3 -7 3 0.85
 -6 -3 7 3.18 0.95
 6 3 -7 3.24 1.15
 -6 3 7 4.7 1.02
 -6 3 7 3.68 0.69
 6 3 -7 2.39 0.83
 -6 3 7 3.36 1.11
 5 -3 -7 34.05 2.27
 5 -3 -7 36.13 2.88
 -5 -3 7 36.32 2.61
 5 -3 -7 29.29 2.13
 -5 -3 7 37.64 2.46
 -5 -3 7 36.57 2.51
 5 -3 -7 34.49 2.2
 5 3 -7 38.27 2.84
 -5 3 7 44.07 2.5
 5 3 -7 37.19 2.48
 -5 3 7 40.17 2.97
 -5 3 7 38.63 2.02
 5 3 -7 35.25 2.71
 4 -3 -7 134.2 5.86
 -4 -3 7 127.88 5.41
 4 -3 -7 131.45 5.15
 4 -3 -7 117.72 5.03
 4 -3 -7 121.74 4.91
 -4 -3 7 128.05 5.3
 -4 -3 7 137.39 4.85
 -4 3 7 141.75 4.97
 -4 3 7 140.59 5.24
 4 3 -7 136.26 5.5
 4 3 -7 126.34 5.67
 4 3 -7 134.37 5.35
 -4 3 7 131.54 5.92
 3 -3 -7 57.67 2.98
 3 -3 -7 56.78 3.15
 -3 -3 7 63.3 2.48
 3 -3 -7 59.08 3.45
 3 -3 -7 56.09 3.01
 -3 -3 7 65.1 3.25
 3 3 -7 64.46 3.47
 -3 3 7 68.93 3.79
 -3 3 7 63.14 3.06
 -3 3 7 60.28 2.95
 3 3 -7 57.69 2.85
 3 3 -7 64.85 3.16
 2 -3 -7 20.35 1.69
 2 -3 -7 20.49 2.17
 2 -3 -7 20.07 2.26
 -2 -3 7 20.04 1.66
 2 3 -7 17.19 1.16
 2 3 -7 20 1.58
 -2 3 7 21.55 1.67
 2 3 -7 16.36 1.93
 -2 3 7 19.3 1.53
 -2 3 7 16.91 2.2
 1 -3 -7 30.82 2.37
 -1 -3 7 41.69 2.36
 1 -3 -7 37.68 2.62
 1 -3 -7 35.69 2.28
 -1 3 7 37.25 2.18
 -1 3 7 38.76 2.39
 1 3 -7 41.3 2.58
 1 3 -7 38.78 1.57
 1 3 -7 33.23 2.25
 1 3 -7 40.51 2.2
 0 -3 7 54.45 2.79
 0 -3 -7 53.87 2.94
 0 -3 -7 63.73 3.54
 0 -3 -7 55.17 3.31
 0 3 7 67.84 3.36
 0 3 -7 57.27 3.17
 0 3 -7 63.03 2.75
 0 3 -7 64.25 2.26
 0 3 -7 58.35 3.26
 0 3 7 59.32 2.89
 -1 -3 -7 14.53 2.04
 -1 -3 -7 13.53 1.65
 -1 -3 -7 14.42 2.08
 1 -3 7 12.99 1.44
 -1 3 -7 14.72 1.08
 -1 3 -7 13.99 1.78
 -1 3 -7 16.17 1.39
 -1 3 -7 12.97 1.05
 -2 -3 -7 8.35 1.63
 -2 -3 -7 9.63 1.41
 2 -3 7 7.3 1.03
 -2 -3 -7 9.5 1.84
 -2 3 -7 6.48 1.29
 -2 3 -7 6.24 1.24
 -2 3 -7 7.87 0.84
 -3 -3 -7 4.57 1.01
 3 -3 7 6.61 0.95
 -3 -3 -7 5.11 1.43
 -3 -3 -7 3.05 1.05
 -3 3 -7 8.02 1.47
 -3 3 -7 5.25 0.55
 -3 3 -7 3.18 1.11
 4 -3 7 5.82 0.84
 -4 -3 -7 3.15 1.27
 -4 -3 -7 5.34 1.43
 -4 3 -7 6.36 1.55
 -4 3 -7 3.7 1.11
 9 -4 -7 0.14 0.53
 -9 -4 7 0.59 0.75
 -9 -4 7 0.8 1.13
 -9 4 7 -0.15 0.42
 -9 4 7 0.27 0.89
 9 4 -7 -0.41 0.6
 -8 -4 7 2.79 1.14
 8 -4 -7 3.85 1
 -8 -4 7 2.58 1.26
 8 -4 -7 1.81 0.78
 -8 4 7 2.48 0.82
 8 4 -7 3.12 1.08
 -8 4 7 4.86 1.65
 7 -4 -7 0.51 0.53
 -7 -4 7 0.9 0.87
 -7 -4 7 0.51 0.64
 7 -4 -7 0.05 0.45
 7 -4 -7 0.58 0.53
 7 4 -7 0.44 0.6
 -7 4 7 0.41 0.35
 7 4 -7 0.82 0.62
 -7 4 7 0.59 0.56
 -7 4 7 0.38 0.82
 6 -4 -7 7.1 1.31
 6 -4 -7 10.5 1.56
 6 -4 -7 9.62 1.35
 -6 -4 7 9.17 1.64
 -6 -4 7 9.79 1.74
 -6 -4 7 11.9 1.8
 6 4 -7 13.35 1.88
 -6 4 7 10.2 1.93
 6 4 -7 9.19 1.61
 -6 4 7 12.22 1.31
 -6 4 7 10.64 1.5
 5 -4 -7 29.73 1.97
 -5 -4 7 27.56 2.34
 -5 -4 7 27.1 2.23
 5 -4 -7 23.06 2.01
 -5 -4 7 28.4 2.14
 5 -4 -7 27.64 2.12
 5 4 -7 31.82 2.37
 -5 4 7 27.28 2.56
 -5 4 7 31.66 1.96
 -5 4 7 29.79 2.11
 4 -4 -7 9.24 1.71
 -4 -4 7 8.83 1.14
 4 -4 -7 8.92 1.41
 4 -4 -7 6.39 1.34
 -4 -4 7 7.56 1.34
 -4 -4 7 10.06 1.59
 4 -4 -7 8.23 1.21
 4 4 -7 10.09 1.71
 -4 4 7 10.28 1.45
 -4 4 7 9.21 1.27
 4 4 -7 6.67 1.24
 -4 4 7 7.37 1.61
 3 -4 -7 23.32 2.05
 -3 -4 7 23.44 1.21
 3 -4 -7 20.15 2.35
 -3 -4 7 28.32 2.11
 3 -4 -7 24 1.95
 -3 -4 7 24.41 2.03
 3 4 -7 26.52 1.99
 -3 4 7 26.53 1.92
 -3 4 7 24.76 1.86
 3 4 -7 23.38 2.09
 -3 4 7 32.58 2.64
 -2 -4 7 37.47 2.39
 2 -4 -7 31.07 2.25
 2 -4 -7 34.38 2.6
 2 -4 -7 29.9 2.44
 -2 4 7 34.99 2.22
 -2 4 7 36.16 2.35
 2 4 -7 38.71 2.58
 2 4 -7 34.91 2.23
 -2 4 7 31.56 2.71
 -1 -4 7 29.14 2.07
 1 -4 -7 25.02 2.03
 1 -4 -7 27.13 2.33
 1 -4 -7 30.85 2.48
 1 4 -7 31.44 2.3
 -1 4 7 31.28 2.23
 1 4 -7 30.1 1.96
 0 -4 -7 11.49 1.84
 0 -4 -7 10.56 1.54
 0 -4 -7 10.12 1.78
 0 -4 7 9.8 1.36
 0 4 -7 8.59 1.41
 0 4 -7 12.74 1.39
 1 -4 7 7.75 1.18
 -1 -4 -7 8.34 1.42
 -1 -4 -7 5.61 1.32
 -1 -4 -7 7.89 1.63
 -1 4 -7 8.14 0.69
 -1 4 -7 8.52 1.05
 -1 4 -7 8.32 1.41
 -1 4 -7 8.59 0.61
 -1 4 -7 7.32 1.3
 -2 -4 -7 23.79 2.86
 -2 -4 -7 22.84 2.75
 2 -4 7 25.16 1.91
 -2 -4 -7 22.47 2.34
 -2 4 -7 23.95 1.37
 -2 4 -7 25.57 1.74
 -2 4 -7 24.71 2.14
 2 4 7 25 2.15
 3 -4 7 2.01 0.65
 -3 -4 -7 0.93 0.97
 -3 -4 -7 1.7 0.87
 -3 -4 -7 1.13 0.66
 -3 4 -7 1.66 0.87
 -3 4 -7 2.28 0.4
 -4 -4 -7 3.98 1.36
 -4 4 -7 3.34 1.1
 -8 -5 7 1.36 1.05
 -8 -5 7 3.87 1.38
 8 -5 -7 2.84 1.03
 -8 5 7 2.79 1.27
 -8 5 7 4.21 1.05
 8 5 -7 4.89 1.3
 -7 -5 7 4.06 1.26
 7 -5 -7 4.78 1.22
 7 -5 -7 3.65 0.88
 -7 -5 7 4.3 1.3
 7 -5 -7 2.09 0.87
 -7 5 7 6.75 1.74
 7 5 -7 2.96 0.96
 7 5 -7 6.34 1.38
 -7 5 7 5.52 0.98
 -7 5 7 4.32 1.01
 6 -5 -7 5.03 1.01
 6 -5 -7 2.63 0.96
 -6 -5 7 4.03 1.22
 6 -5 -7 1.56 0.76
 -6 -5 7 2.22 0.95
 6 5 -7 2.4 0.97
 6 5 -7 4.87 1.18
 -6 5 7 1.96 1.1
 -6 5 7 5.02 1.11
 -6 5 7 3.5 0.82
 5 -5 -7 48.45 3.05
 -5 -5 7 50.5 2.94
 5 -5 -7 48.29 2.58
 5 -5 -7 47.77 3.16
 -5 -5 7 51.54 3.31
 -5 5 7 54.04 3.05
 -5 5 7 57.62 3.02
 -5 5 7 55.73 3.87
 5 5 -7 59.34 3.44
 4 -5 -7 22.46 1.67
 4 -5 -7 22.85 2.01
 -4 -5 7 21.66 1.54
 4 -5 -7 20.74 2.46
 -4 -5 7 27.66 2.26
 -4 5 7 21.82 1.84
 4 5 -7 25.53 2.12
 -4 5 7 20.4 2.14
 -4 5 7 23.41 2.94
 -3 -5 7 34.65 1.34
 3 -5 -7 32.59 2.63
 -3 -5 7 36 2.52
 3 -5 -7 30.91 2.38
 -3 5 7 33.37 2.39
 3 5 -7 36.13 2.47
 -3 5 7 36.19 2.99
 3 5 -7 37.37 2.76
 2 -5 -7 1.01 0.66
 2 -5 -7 2.22 0.86
 -2 5 7 0.82 0.72
 -2 5 7 1.33 0.7
 2 5 -7 0.47 0.6
 2 5 -7 0.73 0.58
 1 -5 -7 10.81 1.65
 1 -5 -7 8.31 1.68
 1 5 -7 12.56 1.72
 1 5 -7 9.33 1.38
 0 -5 -7 35.5 2.87
 0 -5 -7 37.65 2.68
 0 -5 -7 35.67 2.74
 0 5 -7 40.4 2.72
 0 5 -7 45.97 2.49
 -1 -5 -7 0.41 0.56
 -1 -5 -7 0.28 0.69
 -1 -5 -7 0.56 0.8
 1 5 7 2.07 0.9
 -1 5 -7 0.91 0.78
 -1 5 -7 1.04 0.5
 -2 -5 -7 1.14 0.91
 -2 -5 -7 1.64 0.75
 -2 -5 -7 2.93 1.09
 2 5 7 1.81 0.9
 -2 5 -7 2.59 0.6
 -3 -5 -7 1.08 0.92
 -3 -5 -7 0.79 0.86
 -3 -5 -7 0.8 0.66
 -3 5 -7 0.57 0.31
 -3 5 -7 0.72 0.7
 -8 -6 7 1.93 1.18
 8 -6 -7 1.53 0.87
 8 6 -7 0.85 0.83
 7 -6 -7 7.3 1.6
 -7 -6 7 10.12 1.92
 -7 -6 7 5.65 1.52
 7 -6 -7 7.2 1.46
 7 6 -7 6.56 1.53
 7 6 -7 4.96 1.34
 -7 6 7 6.84 1.8
 -7 6 7 7.62 1.94
 6 -6 -7 2.53 1.01
 6 -6 -7 2.62 0.78
 -6 -6 7 3.76 1.23
 6 -6 -7 5.27 1.28
 -6 -6 7 5.54 1.43
 -6 6 7 4.23 1.02
 6 6 -7 1.86 0.98
 -6 6 7 2.54 1.15
 6 6 -7 2.37 0.99
 5 -6 -7 18.62 2.46
 5 -6 -7 15.47 2.07
 -5 -6 7 17.81 1.98
 -5 -6 7 18.7 2.38
 5 -6 -7 15.47 1.39
 -5 6 7 18.66 2.7
 5 6 -7 15.43 2.43
 5 6 -7 13.43 1.96
 -5 6 7 17.06 1.96
 -4 -6 7 5.5 1.33
 4 -6 -7 3.68 0.77
 4 -6 -7 5.23 1.43
 4 -6 -7 2.44 0.87
 -4 -6 7 3.36 0.75
 -4 6 7 4.02 1.07
 4 6 -7 3.69 1.07
 -4 6 7 2.83 1.18
 3 -6 -7 0.87 0.76
 3 -6 -7 1.22 0.69
 -3 -6 7 1.21 0.66
 -3 6 7 0.77 0.83
 3 6 -7 1.19 0.71
 2 -6 -7 5.47 1.32
 2 -6 -7 2.3 1.05
 -2 6 7 4.59 1.47
 2 6 -7 4.23 1.04
 1 -6 -7 10.96 1.71
 1 -6 -7 7.11 1.69
 1 -6 -7 7.68 1.51
 1 6 -7 9.65 1.63
 1 6 -7 12.07 1.67
 0 -6 -7 3.82 1.29
 0 -6 -7 5.95 1.41
 0 -6 -7 5.36 1.26
 0 6 7 6.72 1.58
 0 6 -7 7.07 1.21
 0 6 -7 6.36 1.29
 -1 -6 -7 0.45 0.75
 -1 -6 -7 0.47 0.66
 -1 -6 -7 1.12 0.78
 -1 6 -7 1.68 0.63
 1 6 7 0.09 0.59
 -1 6 -7 0.23 0.64
 -2 -6 -7 2.23 1.18
 -2 -6 -7 0.16 0.76
 -2 -6 -7 1.15 0.82
 2 6 7 3.18 1.13
 -2 6 -7 3.04 0.72
 -3 -6 -7 2.16 0.93
 -3 -6 -7 1.07 0.99
 -3 6 -7 1.36 0.45
 7 -7 -7 13.66 2.17
 7 7 -7 12.52 2.05
 6 -7 -7 2.96 1.23
 -6 -7 7 1.87 0.92
 6 -7 -7 1.56 0.87
 -6 -7 7 3.75 1.23
 -6 7 7 3.4 1.05
 -6 7 7 3.36 1.31
 6 7 -7 2.67 1.04
 -5 -7 7 8.74 1.71
 5 -7 -7 9.03 1.9
 -5 -7 7 8.05 1.42
 5 -7 -7 8.05 1.65
 -5 7 7 7.88 1.89
 5 7 -7 7.48 1.65
 4 -7 -7 4.05 1.23
 4 -7 -7 2.71 0.71
 4 -7 -7 2.39 1.11
 -4 -7 7 1.58 0.87
 4 7 -7 3.89 1.16
 -4 7 7 3.43 1.33
 -3 -7 7 1.6 0.74
 3 -7 -7 2.74 1.12
 3 -7 -7 2.96 1.24
 3 7 -7 4.75 1.2
 -3 7 7 1.86 1.02
 2 -7 -7 15.23 1.89
 2 -7 -7 15.38 2.22
 2 -7 -7 16.83 2.58
 -2 7 7 16.02 2.43
 2 7 -7 19.13 2.3
 -2 7 7 15.43 2.59
 1 -7 -7 5.88 1.38
 1 -7 -7 6.64 1.43
 1 -7 -7 4.53 1.53
 -1 7 7 6 1.52
 1 7 -7 3.52 1.03
 0 -7 -7 3.37 1.09
 0 -7 -7 6.34 1.46
 0 -7 -7 4.88 1.46
 0 7 7 5.77 1.48
 0 7 -7 5.17 1.14
 -1 -7 -7 1.83 1.14
 -1 -7 -7 1.9 0.98
 -1 -7 -7 1.6 0.94
 -1 7 -7 1.07 0.58
 1 7 7 2.58 1.18
 -2 -7 -7 1.3 0.98
 -2 -7 -7 -0.02 0.59
 -2 7 -7 2.43 0.7
 2 7 7 0.69 0.78
 5 -8 -7 2.81 1.26
 5 -8 -7 6.27 1.55
 -5 -8 7 2.63 1.16
 -5 8 7 3.74 1.56
 5 8 -7 3.89 1.28
 -5 8 7 4.39 1.5
 4 -8 -7 2 1.06
 -4 -8 7 3.77 1.21
 4 -8 -7 3.17 1.36
 4 -8 -7 2.39 0.75
 4 8 -7 4.5 1.34
 -4 8 7 3.86 1.38
 -4 8 7 2.91 1.37
 3 -8 -7 22.37 3.07
 3 -8 -7 17.27 2.46
 3 -8 -7 13.02 1.68
 3 8 -7 22.8 2.74
 -3 8 7 28.11 3.38
 -3 8 7 19.96 3.09
 2 -8 -7 12.61 1.84
 2 -8 -7 9.79 1.88
 2 -8 -7 11.29 2.29
 2 8 -7 14.35 2.07
 -2 8 7 15.65 2.58
 1 -8 -7 3.41 1.1
 1 -8 -7 3.03 1.21
 1 -8 -7 4.14 1.29
 1 8 -7 4.38 1.29
 -1 8 7 2.43 1.2
 0 -8 -7 1.05 0.93
 0 -8 -7 1.21 0.87
 0 -8 -7 4.32 1.47
 0 8 7 4.02 1.44
 0 8 -7 2.44 0.88
 -9 0 8 1.47 0.8
 9 0 -8 -0.65 0.37
 -9 0 8 -0.29 0.72
 -9 0 8 0.37 0.68
 -8 0 8 8.66 2.02
 8 0 -8 11.61 1.65
 -8 0 8 9.8 1.7
 -8 0 8 9.03 1.59
 7 0 -8 -0.45 0.31
 7 0 -8 0.7 0.88
 -7 0 8 1.06 0.64
 -7 0 8 0.63 0.75
 7 0 -8 0.44 0.3
 -7 0 8 0.92 0.68
 -6 0 8 9.4 1.75
 6 0 -8 9.04 1.38
 6 0 -8 8.23 1.48
 6 0 -8 6.72 1.61
 -6 0 8 13.04 1.78
 -6 0 8 11.8 1.78
 6 0 -8 11.16 1.18
 5 0 -8 1.65 0.76
 5 0 -8 1.08 0.5
 5 0 -8 2.57 1.02
 -5 0 8 1.03 0.62
 -5 0 8 0.6 0.58
 5 0 -8 2.06 0.71
 4 0 -8 64.29 2.99
 -4 0 8 63.26 3.21
 4 0 -8 61.81 3.41
 -4 0 8 60.76 3.3
 4 0 -8 66.74 3.19
 4 0 -8 62.94 3.56
 3 0 -8 27.93 1.9
 -3 0 8 30.46 2.13
 3 0 -8 29.15 2.18
 -3 0 8 25.58 1.88
 3 0 -8 27.72 1.93
 3 0 -8 32.24 2.21
 2 0 -8 0.17 0.33
 -2 0 8 0.85 0.56
 -2 0 8 0.3 0.39
 2 0 -8 0.03 0.37
 2 0 -8 1.42 0.59
 2 0 -8 1.58 0.61
 1 0 -8 2.03 0.75
 1 0 -8 2.49 0.67
 1 0 -8 1.89 0.68
 -1 0 8 2.5 0.72
 0 0 -8 1.61 0.66
 0 0 8 1.26 0.49
 0 0 -8 1.53 0.54
 0 0 -8 1.35 0.59
 -1 0 -8 4.93 0.86
 -1 0 -8 3.29 0.97
 -1 0 -8 3.2 0.92
 -2 0 -8 3.02 0.7
 -2 0 -8 3.21 1.07
 -2 0 -8 1.54 0.74
 -3 0 -8 0.21 0.33
 -3 0 -8 0.45 0.63
 -4 0 -8 -0.21 0.64
 -4 0 -8 0.66 0.88
 -9 -1 8 1.58 0.78
 9 -1 -8 1.23 0.74
 -9 -1 8 2.22 1.29
 -9 -1 8 1.36 0.86
 -9 1 8 3.28 1.08
 -9 1 8 3.84 1.1
 -9 1 8 1.91 1.21
 9 1 -8 0.66 0.63
 -8 -1 8 12.43 2.34
 -8 -1 8 15.62 2.14
 8 -1 -8 16.71 1.93
 -8 -1 8 15.82 2.21
 8 1 -8 14.31 1.9
 -8 1 8 18.46 2.24
 -8 1 8 13.42 2.52
 -8 1 8 13.89 1.89
 -7 -1 8 7.64 1.4
 -7 -1 8 7.12 1.64
 -7 -1 8 9.73 1.68
 7 -1 -8 4.88 0.79
 7 -1 -8 3.55 0.99
 7 -1 -8 8.52 1.73
 7 1 -8 5.9 0.77
 -7 1 8 7.03 1.64
 -7 1 8 5.81 1.2
 7 1 -8 7.29 1.85
 -7 1 8 7.15 1.44
 7 1 -8 3.89 0.96
 6 -1 -8 11.55 1.7
 -6 -1 8 10.01 1.55
 6 -1 -8 11.83 2.03
 6 -1 -8 10.64 1.5
 -6 -1 8 14.54 2.11
 -6 -1 8 12.93 1.84
 6 -1 -8 12.19 1.34
 -6 1 8 13.62 2.09
 6 1 -8 12.68 1.05
 6 1 -8 10.75 1.55
 6 1 -8 14.24 2.31
 -6 1 8 10.69 1.52
 5 -1 -8 40.31 3.03
 -5 -1 8 38.39 2.53
 5 -1 -8 43.77 2.56
 5 -1 -8 41.53 2.3
 -5 -1 8 43.06 2.85
 -5 -1 8 44.44 2.76
 5 -1 -8 41.38 2.69
 5 1 -8 40.26 2.84
 5 1 -8 37.31 2.89
 5 1 -8 43.24 2.21
 -5 1 8 42.53 2.6
 -5 1 8 46.35 3.02
 5 1 -8 51.64 2.77
 4 -1 -8 8.66 1.23
 4 -1 -8 7.89 1.36
 -4 -1 8 9.16 1.36
 4 -1 -8 8.83 1.31
 -4 -1 8 10.21 1.45
 4 -1 -8 7.59 1.47
 4 1 -8 11.11 1.34
 -4 1 8 8.36 1.3
 4 1 -8 8.73 1.29
 4 1 -8 8.26 1.4
 -4 1 8 10.67 1.62
 -4 1 8 10.24 1.21
 4 1 -8 11.65 1.73
 -3 -1 8 9.43 1.27
 3 -1 -8 9.52 1.37
 3 -1 -8 11.57 1.64
 3 -1 -8 11.65 1.69
 -3 -1 8 11.88 1.49
 3 -1 -8 9.91 1.36
 3 1 -8 8.58 1.37
 3 1 -8 10.75 1.4
 3 1 -8 10.36 1.57
 -3 1 8 8.59 1.17
 -3 1 8 11.27 1.63
 3 1 -8 11.5 1.41
 -3 1 8 6.67 1.11
 -2 -1 8 0.08 0.35
 2 -1 -8 -0.05 0.32
 2 -1 -8 0.41 0.42
 2 -1 -8 0.29 0.44
 -2 -1 8 -0.03 0.39
 -2 1 8 0.42 0.43
 -2 1 8 -0.08 0.4
 2 1 -8 0.72 0.44
 2 1 -8 1.12 0.63
 2 1 -8 0.41 0.35
 2 1 -8 0.28 0.47
 -2 1 8 -0.24 0.31
 -1 -1 8 12.33 1.45
 1 -1 -8 15.5 1.83
 1 -1 -8 13.08 1.51
 1 -1 -8 13.34 1.78
 1 1 -8 13.68 1.43
 1 1 -8 13.26 1.45
 -1 1 8 12.02 1.38
 -1 1 8 12.09 1.49
 1 1 -8 12.12 1.59
 0 -1 8 3.11 0.75
 0 -1 -8 2.71 0.84
 0 -1 -8 3.24 0.97
 0 -1 -8 4.88 0.94
 0 1 -8 2.9 0.66
 0 1 -8 3.66 0.82
 0 1 -8 3.7 1
 -1 -1 -8 2.77 0.73
 -1 -1 -8 2.53 0.9
 1 -1 8 1.91 0.71
 -1 -1 -8 1.8 0.78
 -1 1 -8 2.67 0.61
 -1 1 -8 3.52 0.84
 -1 1 -8 3.68 0.97
 -2 -1 -8 12.21 1.93
 -2 -1 -8 10.04 1.28
 -2 -1 -8 12.77 1.89
 -2 1 -8 11.4 1.15
 -2 1 -8 12.52 1.87
 -2 1 -8 9.17 1.44
 -3 -1 -8 0.8 0.76
 -3 -1 -8 2.44 1.04
 -3 -1 -8 1.9 0.61
 -3 1 -8 2.82 0.97
 -3 1 -8 1.13 0.39
 -4 1 -8 1.62 1.04
 -4 1 -8 2.29 1.28
 9 -2 -8 6.36 1.24
 -9 -2 8 7.36 1.65
 -9 -2 8 8.51 2.11
 -9 2 8 6.06 1.37
 -9 2 8 4.93 1.6
 -9 2 8 5.23 1.23
 9 2 -8 4.24 1.06
 8 -2 -8 3.95 1
 -8 -2 8 6.02 1.5
 -8 -2 8 5.56 1.53
 -8 2 8 5.78 1.25
 8 2 -8 4.07 1.14
 -8 2 8 7.02 1.76
 -8 2 8 3.12 0.96
 7 -2 -8 11.49 1.69
 -7 -2 8 17.09 2.31
 7 -2 -8 12.89 1.73
 -7 -2 8 14.54 2.3
 7 -2 -8 13.14 1.44
 7 2 -8 11.21 1.66
 -7 2 8 12.74 1.7
 7 2 -8 13.1 1
 7 2 -8 11.6 2.25
 -7 2 8 13.4 2.27
 -6 -2 8 2.35 0.97
 6 -2 -8 3.03 0.84
 6 -2 -8 2.65 0.77
 6 -2 -8 1.87 0.76
 -6 -2 8 2.41 0.94
 -6 -2 8 2.35 0.94
 -6 2 8 1.5 0.67
 6 2 -8 3.15 0.63
 6 2 -8 2.25 1.12
 -6 2 8 3.58 1.16
 -6 2 8 3.46 0.68
 6 2 -8 3.19 0.9
 5 -2 -8 0.53 0.76
 -5 -2 8 1.16 0.62
 5 -2 -8 1.01 0.52
 -5 -2 8 0.97 0.65
 -5 -2 8 1.07 0.63
 5 -2 -8 0.49 0.55
 5 -2 -8 1.14 0.57
 -5 2 8 1.6 0.54
 -5 2 8 1.37 0.59
 -5 2 8 1.01 0.75
 5 2 -8 1.07 0.63
 5 2 -8 0.92 0.48
 5 2 -8 0.51 0.7
 4 -2 -8 20.88 1.73
 4 -2 -8 19.61 2.4
 4 -2 -8 22.6 1.79
 -4 -2 8 20.1 1.58
 -4 -2 8 20.72 1.82
 4 -2 -8 21.44 1.82
 4 2 -8 17.27 2.04
 -4 2 8 23.57 2.14
 4 2 -8 22.81 1.81
 4 2 -8 24.69 1.7
 -4 2 8 25.73 1.67
 -4 2 8 19.53 1.68
 3 -2 -8 21.71 1.84
 3 -2 -8 28.66 1.97
 -3 -2 8 21.14 1.5
 3 -2 -8 17.07 2.14
 3 -2 -8 22.34 1.84
 -3 -2 8 21 1.77
 -3 2 8 23.12 1.77
 3 2 -8 22.79 1.72
 -3 2 8 22.36 1.68
 3 2 -8 24.64 2.1
 -3 2 8 26.26 2.27
 3 2 -8 24.23 1.8
 3 2 -8 25.35 1.83
 2 -2 -8 4.05 0.93
 2 -2 -8 2.68 0.94
 2 -2 -8 3.11 0.91
 -2 -2 8 3.51 0.86
 2 2 -8 3.06 0.78
 -2 2 8 4.52 0.96
 2 2 -8 1.31 0.67
 -2 2 8 2.98 0.93
 -2 2 8 4.14 1.01
 2 2 -8 3.77 0.79
 2 2 -8 3.31 0.85
 -1 -2 8 0.22 0.39
 1 -2 -8 -0.05 0.35
 1 -2 -8 0.4 0.48
 1 -2 -8 -0.07 0.42
 1 2 -8 -0.16 0.26
 -1 2 8 0.25 0.44
 1 2 -8 -0.23 0.34
 1 2 -8 0.15 0.35
 0 -2 -8 2.74 0.96
 0 -2 -8 1.61 0.6
 0 -2 -8 3.11 0.98
 0 2 -8 1.84 0.76
 0 2 -8 2.7 0.66
 0 2 -8 2.9 0.63
 -1 -2 -8 9.07 1.29
 -1 -2 -8 6.72 1.43
 -1 -2 -8 9.31 1.6
 -1 2 -8 10.65 1.66
 -1 2 -8 9.31 1.22
 -1 2 -8 11.07 1.15
 -2 -2 -8 1.13 0.73
 -2 -2 -8 0.89 0.56
 -2 2 -8 1.22 0.71
 -2 2 -8 1.04 0.41
 -2 2 -8 0.47 0.44
 -3 -2 -8 11.19 1.37
 -3 -2 -8 10.15 2.05
 -3 -2 -8 9.58 1.8
 -3 2 -8 11.07 1.99
 -3 2 -8 13.4 0.87
 -3 2 -8 12.94 1.94
 -9 -3 8 3.63 1.28
 9 -3 -8 4.59 1.13
 -9 -3 8 5.36 1.71
 -9 3 8 4.01 1.05
 -9 3 8 3.46 1.51
 9 3 -8 2.67 1
 -9 3 8 6.06 1.67
 -8 -3 8 4.33 1.38
 8 -3 -8 5.28 1.12
 8 -3 -8 6.56 1.28
 -8 -3 8 8.25 1.69
 -8 3 8 10.45 2.09
 -8 3 8 6.99 1.39
 8 3 -8 8.82 1.6
 7 -3 -8 41.22 2.7
 -7 -3 8 38.29 3.09
 -7 -3 8 42.36 3.14
 7 -3 -8 38.48 2.66
 7 -3 -8 43.73 2.49
 -7 3 8 38.4 3.31
 7 3 -8 44.23 2.9
 -7 3 8 42.98 2
 -7 3 8 42.76 2.74
 7 3 -8 41.95 3.53
 7 3 -8 40.14 2.67
 7 3 -8 46.88 2.16
 6 -3 -8 13.13 1.67
 -6 -3 8 14.32 2.07
 6 -3 -8 19.43 2.13
 -6 -3 8 18.04 2.13
 6 -3 -8 15.52 1.86
 6 3 -8 16.32 1.96
 -6 3 8 19.78 2.67
 6 3 -8 17.98 1.36
 6 3 -8 16.1 2.29
 -6 3 8 16.72 1.91
 -6 3 8 13.87 1.17
 5 -3 -8 16.08 1.87
 -5 -3 8 14.49 1.99
 -5 -3 8 15.68 1.77
 5 -3 -8 11.6 1.58
 5 -3 -8 10.55 1.51
 5 3 -8 16.56 1.99
 -5 3 8 14.03 1.24
 5 3 -8 13.4 1.96
 5 3 -8 13.56 1.52
 -5 3 8 13.03 1.68
 -5 3 8 11.56 1.95
 4 -3 -8 6.32 1.19
 4 -3 -8 5.64 1.17
 4 -3 -8 2.91 0.86
 4 -3 -8 6.1 1.4
 -4 -3 8 6.24 0.92
 4 3 -8 7.07 1.16
 4 3 -8 5.66 1.13
 4 3 -8 4.74 1.14
 -4 3 8 3.14 0.77
 -4 3 8 8.17 1.64
 3 -3 -8 2.39 0.76
 3 -3 -8 2.02 0.75
 3 -3 -8 2.48 0.9
 -3 -3 8 1.38 0.44
 3 3 -8 1.31 0.6
 3 3 -8 1.22 0.56
 3 3 -8 2.19 0.72
 -3 3 8 1.14 0.55
 -3 3 8 1.5 0.87
 2 -3 -8 3.37 0.89
 2 -3 -8 1.84 0.83
 2 -3 -8 2.29 0.89
 2 3 -8 2.37 0.56
 2 3 -8 1.93 0.71
 2 3 -8 2.68 0.82
 -2 3 8 3.28 1.08
 -2 3 8 3.63 0.93
 1 -3 -8 1.53 0.65
 1 -3 -8 0.71 0.63
 1 -3 -8 1.75 0.79
 1 3 -8 1.55 0.6
 1 3 -8 0.32 0.5
 1 3 -8 0.63 0.34
 0 -3 -8 3.42 1.08
 0 -3 -8 4.67 1.02
 0 -3 -8 6.82 1.43
 0 3 -8 5.09 1.14
 0 3 -8 4.92 0.83
 0 3 -8 5.08 0.68
 -1 -3 -8 4.36 1.25
 -1 -3 -8 6.34 1.23
 -1 3 -8 6.95 0.92
 -1 3 -8 6.66 0.89
 -1 3 -8 4.92 1.03
 -1 3 -8 7.75 1.52
 -2 -3 -8 0.01 0.63
 -2 -3 -8 0.35 0.67
 -2 -3 -8 -0.14 0.42
 -2 3 -8 -0.48 0.43
 -2 3 -8 -0.01 0.55
 -2 3 -8 -0.17 0.24
 -3 -3 -8 1.79 0.96
 -3 -3 -8 1.88 0.96
 -3 -3 -8 3.05 0.85
 -3 3 -8 2.95 1.08
 -3 3 -8 2.17 0.42
 -9 -4 8 0.93 1.03
 9 -4 -8 2.93 1.03
 9 4 -8 2.56 1.01
 8 -4 -8 13.56 1.82
 -8 -4 8 14.72 2.48
 8 -4 -8 12.22 1.78
 -8 -4 8 14.05 2.23
 -8 4 8 11.46 2.24
 8 4 -8 14.08 2.05
 -8 4 8 14.07 2.09
 -7 -4 8 1.2 0.95
 7 -4 -8 1.57 0.76
 7 -4 -8 2.48 0.8
 -7 -4 8 3.06 1.13
 7 -4 -8 2.66 0.88
 7 4 -8 3.38 1.06
 -7 4 8 2.21 0.64
 7 4 -8 0.8 0.65
 -7 4 8 1.89 1.07
 6 -4 -8 7.46 1.4
 6 -4 -8 5.93 1.26
 -6 -4 8 10.82 1.77
 -6 -4 8 8.41 1.69
 6 -4 -8 8.1 1.38
 -6 4 8 6.42 1.01
 6 4 -8 7.16 1.44
 -6 4 8 10.79 2.06
 5 -4 -8 5.81 1.21
 -5 -4 8 6.89 1.44
 5 -4 -8 4.95 1.08
 5 -4 -8 8.09 1.43
 -5 -4 8 6.33 1.1
 -5 4 8 7.94 1.68
 5 4 -8 8.3 1.46
 -5 4 8 8.79 1.21
 -4 -4 8 3.86 1.03
 -4 -4 8 2.35 0.56
 4 -4 -8 1.06 0.67
 4 -4 -8 2.02 0.84
 4 -4 -8 0.93 0.52
 -4 4 8 2.48 1.02
 4 4 -8 1.88 0.72
 -4 4 8 2.49 0.73
 -3 -4 8 4.87 0.6
 3 -4 -8 4.04 1.07
 3 -4 -8 5.14 1.25
 -3 4 8 3.76 1.27
 -3 4 8 4.33 0.92
 3 4 -8 7.35 1.27
 2 -4 -8 12.73 1.88
 2 -4 -8 13.85 1.85
 -2 4 8 16.14 2.4
 2 4 -8 15.11 1.74
 1 -4 -8 4.64 1.2
 1 -4 -8 6.92 1.34
 1 4 -8 4.91 0.97
 0 -4 -8 0.93 0.64
 0 -4 -8 0.28 0.61
 0 4 -8 2.56 0.91
 0 4 -8 0.58 0.48
 -1 -4 -8 4.28 1.19
 -1 -4 -8 3.3 0.95
 -1 4 -8 1.45 0.83
 -1 4 -8 3.34 0.73
 -2 -4 -8 2.91 0.91
 -2 -4 -8 4.46 1.35
 -2 -4 -8 3.29 1.24
 -2 4 -8 2.59 0.91
 -2 4 -8 3.36 0.61
 -3 -4 -8 3.16 0.95
 -8 -5 8 4.95 1.63
 -8 -5 8 3.45 1.42
 8 -5 -8 2.25 0.98
 8 5 -8 2.68 1.06
 -8 5 8 4.15 1.49
 7 -5 -8 57.14 3.48
 -7 -5 8 58.63 3.79
 7 -5 -8 53.72 3.06
 -7 -5 8 54.97 3.79
 7 -5 -8 53.08 3.35
 7 5 -8 65.28 3.83
 -7 5 8 59.8 4.36
 7 5 -8 55.84 3.67
 6 -5 -8 3.18 0.86
 -6 -5 8 2.58 1.03
 -6 -5 8 4.49 1.12
 6 -5 -8 3.93 1.19
 6 -5 -8 4.69 1.2
 6 5 -8 2.21 1.1
 -6 5 8 4.13 0.9
 -6 5 8 4.31 1.37
 6 5 -8 4.75 1.16
 -5 -5 8 18.4 2.41
 5 -5 -8 16.85 2.16
 5 -5 -8 19.76 1.7
 -5 -5 8 20.52 1.65
 5 -5 -8 18.01 2.31
 -5 5 8 22.82 1.85
 5 5 -8 20.32 2.32
 -5 5 8 24.85 3.14
 -4 -5 8 2.51 0.54
 -4 -5 8 2.71 0.96
 4 -5 -8 2.4 1.03
 4 -5 -8 1.77 0.81
 4 -5 -8 2.82 0.8
 4 5 -8 2.71 0.94
 -4 5 8 0.52 0.77
 -4 5 8 2.61 0.84
 3 -5 -8 14.88 2.15
 3 -5 -8 13.06 1.86
 -3 5 8 12.84 2.25
 3 5 -8 12.63 1.73
 2 -5 -8 4.31 1.16
 2 -5 -8 1.64 0.9
 -2 5 8 2.58 1.13
 2 5 -8 0.88 0.6
 1 -5 -8 12.62 1.85
 1 -5 -8 11.71 2.01
 1 5 -8 14.3 1.72
 0 -5 -8 11.37 1.74
 0 -5 -8 13.41 2.21
 0 5 -8 18.63 1.54
 -1 -5 -8 -0.11 0.66
 -1 -5 -8 -0.08 0.52
 -1 -5 -8 -0.16 0.57
 -1 5 -8 0 0.39
 -1 5 -8 -0.16 0.5
 -2 -5 -8 5.43 1.3
 -2 -5 -8 1.82 1.09
 -2 -5 -8 3.64 1.32
 -2 5 -8 4.36 0.75
 -2 5 -8 8.55 1.64
 7 -6 -8 6.09 1.5
 -7 -6 8 6.69 1.62
 7 -6 -8 6.69 1.46
 -7 -6 8 8.09 1.78
 7 6 -8 4.36 1.26
 -7 6 8 4.33 1.6
 6 -6 -8 1.2 0.83
 -6 -6 8 1.3 0.81
 -6 -6 8 2.55 1.1
 6 -6 -8 3.31 1.21
 6 -6 -8 1.9 0.77
 6 6 -8 1.47 1.03
 6 6 -8 1.14 0.81
 -6 6 8 3.91 0.95
 -6 6 8 1.86 1.09
 -5 -6 8 1.62 0.84
 -5 -6 8 2 0.74
 5 -6 -8 0.98 0.59
 5 -6 -8 1.23 0.78
 5 -6 -8 1.26 0.89
 -5 6 8 0.43 0.84
 5 6 -8 3.7 1.16
 -5 6 8 2.11 0.97
 4 -6 -8 1.67 0.89
 4 -6 -8 0.39 0.56
 -4 -6 8 0.87 0.75
 4 -6 -8 2.4 0.77
 -4 6 8 2.21 1.2
 4 6 -8 0.31 0.53
 3 -6 -8 6.56 1.64
 3 -6 -8 4.56 1.19
 -3 6 8 7.22 1.88
 3 6 -8 9.73 1.63
 2 -6 -8 16.66 2.23
 2 -6 -8 15.76 2.49
 -2 6 8 22.58 3.06
 2 6 -8 20.13 2.19
 1 -6 -8 2.09 0.89
 1 -6 -8 2.63 1.17
 1 6 -8 3.06 0.89
 0 -6 -8 6.66 1.52
 0 -6 -8 7.69 1.66
 0 -6 -8 5.33 1.55
 0 6 -8 9.39 1.35
 -1 -6 -8 4.09 1.38
 -1 -6 -8 6.77 1.69
 -1 -6 -8 6.47 1.42
 -1 6 -8 5.01 0.94
 1 6 8 3 1.21
 6 -7 -8 11.24 1.95
 6 -7 -8 7.76 1.9
 -6 -7 8 9.24 1.85
 6 7 -8 10.8 1.88
 -5 -7 8 3.86 1.18
 5 -7 -8 3.78 1.22
 5 -7 -8 3.45 1.44
 -5 7 8 4.64 1.59
 5 7 -8 5.08 1.37
 4 -7 -8 2.2 0.99
 4 -7 -8 2.49 1.16
 4 -7 -8 1.57 0.66
 -4 -7 8 2.9 1.17
 -4 7 8 1.19 1
 4 7 -8 2.03 0.97
 3 -7 -8 0.02 0.67
 3 -7 -8 -0.26 0.57
 -3 7 8 -0.51 0.64
 3 7 -8 1.38 0.82
 2 -7 -8 11.59 1.97
 2 -7 -8 10.94 2.17
 2 -7 -8 7.93 1.48
 2 7 -8 14.41 1.99
 1 -7 -8 30.65 2.64
 1 -7 -8 25.53 2.96
 1 -7 -8 28.28 3.51
 1 7 -8 31.73 2.4
 -1 7 8 28.18 3.35
 0 -7 -8 8.71 2
 0 -7 -8 3.39 1.44
 0 -7 -8 6.23 1.56
 0 7 8 9.32 1.93
 0 7 -8 8.91 1.41
 4 -8 -8 2.79 1.08
 4 -8 -8 5.94 1.59
 4 -8 -8 3.38 1.31
 -4 -8 8 4.36 1.24
 3 -8 -8 4.87 1.21
 3 -8 -8 2.22 1.11
 3 -8 -8 2.42 1.25
 -3 8 8 3.77 1.44
 2 -8 -8 -0.45 0.58
 2 -8 -8 -0.78 0.78
 -2 8 8 0.98 0.99
 9 0 -9 2.48 0.89
 -9 0 9 2.74 1.32
 -9 0 9 2.43 1.05
 -8 0 9 0.82 0.71
 -8 0 9 -0.13 0.72
 8 0 -9 -0.23 0.54
 -7 0 9 3.91 1.26
 -7 0 9 3.14 1.05
 7 0 -9 3.55 1.05
 7 0 -9 2.91 0.68
 6 0 -9 18.42 1.45
 6 0 -9 20.3 2.16
 -6 0 9 16.36 2.18
 6 0 -9 14.82 2.34
 5 0 -9 3.72 0.88
 -5 0 9 4.84 1.18
 5 0 -9 4.71 1.03
 5 0 -9 3.06 1.06
 4 0 -9 42.21 2.93
 4 0 -9 45.5 2.59
 -4 0 9 45.65 2.86
 4 0 -9 45.61 2.67
 -3 0 9 0.47 0.55
 3 0 -9 2.17 0.79
 3 0 -9 0.11 0.39
 3 0 -9 0.41 0.57
 2 0 -9 1.45 0.65
 2 0 -9 2.03 0.8
 2 0 -9 1.17 0.55
 1 0 -9 12.57 1.47
 1 0 -9 12.02 1.76
 1 0 -9 9.78 1.44
 0 0 -9 0.52 0.61
 0 0 -9 1.06 0.61
 0 0 -9 1.66 0.59
 -1 0 -9 4.08 1.02
 -1 0 -9 4.36 0.91
 -1 0 -9 5.63 1.31
 -2 0 -9 -0.01 0.35
 -2 0 -9 0.18 0.54
 -2 0 -9 -0.16 0.61
 9 -1 -9 0.37 0.62
 -9 -1 9 0.41 0.96
 -9 -1 9 0.13 0.67
 -9 1 9 0.18 0.67
 9 1 -9 0.3 0.55
 -9 1 9 1.97 1.24
 -8 -1 9 8.65 1.89
 -8 -1 9 8.07 1.7
 8 -1 -9 8.99 1.55
 -8 1 9 7.48 1.53
 -8 1 9 8.78 1.91
 8 1 -9 6.32 1.32
 -7 -1 9 4.01 1.23
 -7 -1 9 7.33 1.5
 7 -1 -9 3.59 0.99
 7 -1 -9 3.2 0.75
 -7 1 9 3.16 1.24
 7 1 -9 2.95 1.24
 7 1 -9 4.56 0.79
 7 1 -9 4 1.04
 6 -1 -9 17.86 1.51
 6 -1 -9 17.84 2.03
 6 -1 -9 16.57 2.89
 -6 -1 9 19.87 2.42
 -6 -1 9 20.73 2.42
 -6 1 9 19.55 2.46
 6 1 -9 15.85 2.37
 6 1 -9 21.96 1.9
 6 1 -9 19.93 1.46
 -5 -1 9 67.45 3.55
 5 -1 -9 63.81 3.99
 5 -1 -9 65.86 3.25
 5 -1 -9 67.9 3.47
 5 1 -9 69.07 3.45
 5 1 -9 57.46 3.72
 -5 1 9 58.94 3.65
 5 1 -9 67.03 3.09
 4 -1 -9 24.47 1.93
 4 -1 -9 25.06 2.24
 -4 -1 9 29.43 2.07
 4 -1 -9 22.96 1.9
 -4 1 9 21.02 2.36
 4 1 -9 23.39 2.12
 4 1 -9 23.59 1.8
 4 1 -9 23.7 1.88
 -3 -1 9 20.76 1.72
 3 -1 -9 23.21 2.02
 3 -1 -9 21.29 1.88
 3 -1 -9 15.81 1.83
 3 1 -9 19.04 1.71
 -3 1 9 21.3 2.4
 3 1 -9 19.25 1.76
 3 1 -9 17.25 1.86
 -3 1 9 20.13 1.64
 2 -1 -9 5.77 1.17
 2 -1 -9 8.18 1.39
 2 -1 -9 5.37 1.04
 2 1 -9 7.45 1.14
 2 1 -9 6.96 1.14
 2 1 -9 8.43 1.42
 1 -1 -9 0.46 0.46
 1 -1 -9 0.18 0.55
 1 -1 -9 0.38 0.65
 1 1 -9 0.51 0.43
 1 1 -9 1.01 0.55
 1 1 -9 0.91 0.67
 0 -1 -9 0.27 0.63
 0 -1 -9 -0.28 0.34
 0 -1 -9 -0.35 0.34
 0 1 -9 0.45 0.54
 0 1 -9 0.13 0.36
 0 1 -9 0.35 0.45
 -1 -1 -9 0.87 0.74
 -1 -1 -9 -0.31 0.5
 -1 -1 -9 0.43 0.42
 -1 1 -9 0.3 0.68
 -1 1 -9 -0.12 0.34
 -1 1 -9 -0.19 0.41
 -2 -1 -9 1.65 0.64
 -2 -1 -9 2.5 0.99
 -2 1 -9 1.72 0.88
 -2 1 -9 3.1 0.71
 9 -2 -9 8.73 1.51
 -9 -2 9 9.37 2.14
 -9 -2 9 14.8 2.35
 -9 2 9 8.39 2
 9 2 -9 10.5 1.77
 -9 2 9 8.1 1.57
 -8 -2 9 -0.03 0.83
 -8 -2 9 1.28 0.89
 8 -2 -9 1.14 0.76
 8 2 -9 0.69 0.73
 -8 2 9 0.26 0.76
 -7 -2 9 13.79 2.15
 7 -2 -9 11.74 1.49
 7 -2 -9 9.24 1.52
 -7 -2 9 13.7 2.1
 7 2 -9 13.51 1.15
 -7 2 9 14.31 2.31
 7 2 -9 11.05 1.74
 7 2 -9 9.35 2.06
 -6 -2 9 1.79 0.8
 6 -2 -9 1.69 0.69
 6 -2 -9 1.52 0.75
 -6 -2 9 2.57 1.04
 -6 2 9 3.71 1.2
 6 2 -9 2.01 0.64
 -6 2 9 2.38 0.64
 6 2 -9 0.67 0.63
 6 2 -9 2.27 1.05
 5 -2 -9 24.08 2.02
 -5 -2 9 27.72 2.05
 5 -2 -9 27.85 3.5
 5 -2 -9 28.02 2.08
 5 2 -9 25.59 2.36
 -5 2 9 30.79 2.6
 -5 2 9 28.42 1.82
 5 2 -9 29.98 1.94
 5 2 -9 25.02 2.06
 4 -2 -9 4.6 1.05
 4 -2 -9 1.93 0.96
 -4 -2 9 2.24 0.67
 4 -2 -9 2.84 0.87
 4 2 -9 2.57 0.88
 4 2 -9 2.8 0.74
 -4 2 9 3.05 0.75
 -4 2 9 3.52 1.12
 4 2 -9 2.74 0.85
 3 -2 -9 4.71 1.18
 3 -2 -9 6.16 1.28
 3 -2 -9 7.36 1.27
 -3 -2 9 8.93 1.21
 -3 2 9 7.15 1.2
 -3 2 9 7.12 1.51
 3 2 -9 7.58 1.25
 3 2 -9 6.94 1.19
 3 2 -9 10 1.41
 2 -2 -9 2.48 0.8
 2 -2 -9 3.58 1
 2 -2 -9 5.13 1.19
 2 2 -9 3.6 0.92
 2 2 -9 4.04 0.85
 2 2 -9 3.63 0.85
 1 -2 -9 8.4 1.55
 1 -2 -9 6.41 1.21
 1 -2 -9 5.26 1.22
 1 2 -9 4.77 0.94
 1 2 -9 7.41 1.06
 1 2 -9 6.17 1.21
 0 -2 -9 7.63 1.56
 0 -2 -9 8 1.27
 0 -2 -9 6.8 1.44
 0 2 -9 6.71 1.02
 0 2 -9 9.09 1.56
 0 2 -9 9.05 1.18
 -1 -2 -9 1.29 0.64
 -1 -2 -9 0.53 0.72
 -1 2 -9 1.23 0.48
 -1 2 -9 0.61 0.64
 -2 -2 -9 2.62 0.82
 -2 -2 -9 3.61 1.21
 -2 2 -9 3.2 1.03
 -2 2 -9 3.88 0.73
 -8 -3 9 26.18 3.06
 8 -3 -9 28.96 2.36
 -8 -3 9 23.49 2.92
 8 3 -9 31.09 2.55
 -8 3 9 29.85 3.61
 7 -3 -9 7.55 1.35
 -7 -3 9 6.98 1.55
 7 -3 -9 9.6 1.58
 -7 -3 9 9.87 1.88
 -7 3 9 8.76 1.92
 7 3 -9 6.64 1.42
 7 3 -9 7.99 1.07
 7 3 -9 4.26 1.4
 -6 -3 9 15.07 2.14
 6 -3 -9 10.09 1.57
 6 -3 -9 12.34 1.73
 -6 -3 9 10.16 1.56
 -6 3 9 13.57 1.44
 6 3 -9 15.34 1.37
 6 3 -9 14.56 2.23
 -6 3 9 18.39 2.59
 6 3 -9 12.6 1.77
 5 -3 -9 -0.38 0.38
 5 -3 -9 -0.23 0.5
 -5 -3 9 0.35 0.37
 5 3 -9 -0.13 0.63
 5 3 -9 -0.19 0.42
 5 3 -9 0.34 0.43
 -5 3 9 0.12 0.63
 -5 3 9 0.6 0.43
 4 -3 -9 18.94 2.2
 -4 -3 9 22.08 1.53
 4 -3 -9 17.29 2.01
 4 3 -9 15.23 1.84
 -4 3 9 20.62 1.67
 4 3 -9 19.81 1.68
 -4 3 9 21.57 2.72
 4 3 -9 21.6 2.22
 3 -3 -9 4.84 1.21
 -3 -3 9 5.45 0.85
 3 -3 -9 4.87 1.12
 3 3 -9 6.17 1.26
 3 3 -9 4.93 0.95
 -3 3 9 3.37 1.19
 3 3 -9 4.98 1.05
 2 -3 -9 3.58 1.04
 2 -3 -9 3.67 0.99
 2 3 -9 3.96 0.93
 2 3 -9 6.6 1.28
 2 3 -9 4.4 0.78
 1 -3 -9 4.9 1.1
 1 -3 -9 3.15 0.99
 1 3 -9 4.78 1.15
 1 3 -9 4.57 0.92
 0 -3 -9 -0.61 0.46
 0 -3 -9 0.75 0.53
 0 3 -9 0.52 0.41
 0 3 -9 0.53 0.57
 -1 -3 -9 0.01 0.59
 -1 -3 -9 0.12 0.52
 -1 3 -9 0.37 0.37
 -1 3 -9 -0.24 0.46
 -2 -3 -9 11.53 1.61
 -2 3 -9 15.37 1.16
 -8 -4 9 4.89 1.46
 8 -4 -9 3.32 1.05
 8 4 -9 5.26 1.35
 -8 4 9 5.31 1.6
 7 -4 -9 21.33 2.41
 -7 -4 9 16.56 2.41
 7 -4 -9 21.72 2.39
 -7 -4 9 21.55 2.55
 7 -4 -9 23.11 2.69
 -7 4 9 23.11 3.12
 7 4 -9 21.95 2.57
 6 -4 -9 15.26 1.88
 6 -4 -9 15.41 2.04
 -6 -4 9 15.46 2.26
 -6 -4 9 15.61 1.95
 6 -4 -9 13.35 1.89
 -6 4 9 15.63 1.63
 6 4 -9 16.15 2.13
 -6 4 9 9.26 1.95
 5 -4 -9 8.87 1.66
 5 -4 -9 10.08 1.69
 5 -4 -9 11.92 1.82
 -5 -4 9 10.36 1.29
 -5 -4 9 11.78 1.94
 -5 4 9 9.94 1.36
 5 4 -9 10.77 1.68
 -5 4 9 12.91 2.24
 5 4 -9 11.87 1.75
 4 -4 -9 6.3 1.34
 -4 -4 9 4.85 0.75
 4 -4 -9 3.41 1.07
 -4 4 9 5.05 1.06
 -4 4 9 5.79 1.52
 4 4 -9 3.45 1.02
 3 -4 -9 1.1 0.77
 3 -4 -9 0.93 0.66
 3 4 -9 1.72 0.72
 3 4 -9 2.45 0.84
 -3 4 9 2.46 1.03
 2 -4 -9 0.59 0.6
 2 -4 -9 1.15 0.72
 2 4 -9 0.56 0.63
 2 4 -9 1.18 0.63
 1 -4 -9 2.49 0.99
 1 -4 -9 1.97 0.82
 1 4 -9 2.39 0.85
 1 4 -9 3.89 0.89
 0 -4 -9 -0.63 0.36
 0 -4 -9 1 0.73
 0 4 -9 0.77 0.61
 0 4 -9 0.17 0.38
 -1 -4 -9 2 0.9
 -1 -4 -9 0.04 0.46
 -1 4 -9 -0.08 0.62
 -1 4 -9 0.14 0.36
 -7 -5 9 2.39 0.99
 -7 -5 9 2.34 1.22
 7 -5 -9 4.11 1.19
 7 -5 -9 4.81 1.17
 7 -5 -9 3.24 1.1
 -7 5 9 3.78 1.41
 7 5 -9 2.89 1.02
 6 -5 -9 1.19 0.75
 -6 -5 9 1.16 0.86
 6 -5 -9 0.9 0.62
 6 -5 -9 0.25 0.54
 -6 -5 9 0.92 0.7
 6 5 -9 0.16 0.58
 -6 5 9 0.72 0.52
 -6 5 9 1.46 0.97
 5 -5 -9 0.58 0.72
 5 -5 -9 1.48 0.78
 -5 -5 9 1.31 0.79
 5 -5 -9 0.51 0.55
 5 5 -9 2.64 0.95
 -5 5 9 3.39 1.27
 -5 5 9 1.5 0.77
 4 -5 -9 0.07 0.58
 4 -5 -9 0.05 0.66
 4 5 -9 0.4 0.58
 -4 5 9 1.26 0.99
 3 -5 -9 3.48 1.24
 3 -5 -9 2.58 0.92
 -3 5 9 4.33 1.41
 3 5 -9 1.87 0.79
 2 -5 -9 13.19 1.91
 2 -5 -9 9.1 1.87
 2 5 -9 15.87 1.86
 1 -5 -9 10.59 1.75
 1 -5 -9 7.19 1.76
 1 5 -9 9.02 1.62
 1 5 -9 10.37 1.44
 0 -5 -9 0.48 0.59
 0 -5 -9 1.64 1
 0 5 -9 1.24 0.64
 0 5 -9 0.77 0.76
 -1 -5 -9 0.77 0.94
 -1 -5 -9 1.77 0.93
 -1 5 -9 1.92 0.63
 6 -6 -9 0.64 0.71
 -6 -6 9 0.39 0.7
 6 -6 -9 1.1 0.9
 6 6 -9 1.62 0.91
 -6 6 9 1 0.99
 5 -6 -9 1.11 0.9
 5 -6 -9 0.7 0.61
 -5 -6 9 0.72 0.72
 5 -6 -9 1.02 0.75
 5 6 -9 1.29 0.79
 -5 6 9 0.86 0.97
 4 -6 -9 2.72 1.02
 4 -6 -9 1.03 0.99
 -4 6 9 1.4 1.06
 4 6 -9 0.52 0.67
 3 -6 -9 2.36 1.2
 3 -6 -9 2.2 0.91
 -3 6 9 1.8 1.18
 3 6 -9 1.67 0.82
 2 -6 -9 8.85 1.72
 2 -6 -9 8.35 1.94
 2 6 -9 9.91 1.54
 1 -6 -9 8.81 1.83
 1 -6 -9 9.04 1.68
 1 6 -9 12.56 1.68
 0 -6 -9 7.97 1.75
 0 6 -9 8.94 1.39
 4 -7 -9 0.74 0.91
 4 -7 -9 0.49 0.7
 3 -7 -9 0.81 0.85
 2 -7 -9 8.93 2.14
 -8 0 10 6.59 1.75
 8 0 -10 7.88 1.5
 -8 0 10 5.87 1.46
 7 0 -10 3.58 0.8
 -7 0 10 3.15 1.12
 7 0 -10 4.5 1.1
 6 0 -10 8.81 1.89
 6 0 -10 11.12 1.63
 -6 0 10 11.56 1.89
 6 0 -10 10.55 1.42
 5 0 -10 9.34 1.49
 5 0 -10 10.56 1.92
 5 0 -10 11.22 1.57
 -5 0 10 8.74 1.56
 -4 0 10 0.76 0.64
 4 0 -10 -0.05 0.39
 4 0 -10 1.52 0.84
 4 0 -10 -0.03 0.49
 3 0 -10 3.03 0.98
 3 0 -10 1.52 0.68
 -3 0 10 1.88 0.8
 3 0 -10 0.72 0.61
 2 0 -10 9.79 1.69
 2 0 -10 10.33 1.56
 2 0 -10 9.56 1.42
 1 0 -10 18.7 2.3
 1 0 -10 16.6 1.94
 1 0 -10 20.78 1.7
 0 0 -10 1.31 0.8
 0 0 -10 1.17 0.67
 0 0 -10 1.37 0.61
 -1 0 -10 0.85 0.53
 8 -1 -10 10.15 1.73
 -8 -1 10 16.01 2.45
 -8 -1 10 16.57 2.39
 8 1 -10 16.56 2.16
 -8 1 10 15.65 2.46
 -7 -1 10 8.88 1.72
 7 -1 -10 8.16 1.25
 7 -1 -10 5.16 1.19
 7 1 -10 11.71 1.36
 -7 1 10 6.34 1.56
 7 1 -10 9.13 1.55
 6 -1 -10 6.32 1.17
 -6 -1 10 7.88 1.53
 6 1 -10 3.78 1.08
 6 1 -10 3.34 0.83
 6 1 -10 4.77 1.41
 -6 1 10 4.98 1.33
 5 -1 -10 3.33 0.94
 5 -1 -10 1.3 0.87
 -5 -1 10 4.88 1.15
 5 -1 -10 3.69 0.95
 -5 1 10 3.2 1.09
 5 1 -10 3.8 0.96
 5 1 -10 4.82 1.3
 5 1 -10 5.13 1.16
 4 -1 -10 4.14 1.04
 4 -1 -10 5.2 1.13
 4 -1 -10 3.13 1.12
 -4 -1 10 4.37 1.05
 4 1 -10 5.1 1.12
 4 1 -10 4.52 1.24
 4 1 -10 3.79 0.96
 -4 1 10 3.83 1.19
 3 -1 -10 4.91 1.06
 3 -1 -10 5.93 1.3
 3 -1 -10 3.9 1.09
 -3 -1 10 5.98 1.17
 3 1 -10 6.98 1.28
 3 1 -10 6.44 1.16
 -3 1 10 5.02 1.24
 3 1 -10 6.95 1.31
 2 -1 -10 1.41 0.75
 2 -1 -10 1.76 0.71
 2 -1 -10 0.88 0.73
 2 1 -10 1.45 0.76
 2 1 -10 0.91 0.54
 2 1 -10 0.92 0.64
 1 -1 -10 6.07 1.45
 1 -1 -10 5.01 1.04
 1 -1 -10 8.05 1.47
 1 1 -10 6.4 1.39
 1 1 -10 4.77 1.07
 0 -1 -10 0.34 0.65
 0 -1 -10 -0.11 0.47
 0 -1 -10 -0.32 0.43
 0 1 -10 0.12 0.39
 0 1 -10 0.65 0.67
 -1 -1 -10 0.28 0.53
 -1 1 -10 0.37 0.46
 -8 -2 10 3.74 1.24
 8 -2 -10 4.27 1.18
 -8 -2 10 3.32 1.27
 8 2 -10 4.99 1.35
 -8 2 10 3.65 1.33
 7 -2 -10 3.03 0.96
 7 -2 -10 2.83 0.83
 -7 -2 10 4.4 1.23
 -7 -2 10 5.93 1.47
 7 2 -10 2.19 1.19
 -7 2 10 2.46 1.15
 7 2 -10 3.35 0.8
 7 2 -10 2.95 1.01
 6 -2 -10 10.76 1.67
 6 -2 -10 8.94 1.46
 -6 -2 10 8.21 1.44
 6 2 -10 10.86 1.4
 6 2 -10 9.57 1.61
 6 2 -10 7.02 1.59
 -6 2 10 7.89 1.73
 5 -2 -10 6.33 1.22
 5 -2 -10 5.87 1.26
 -5 -2 10 11.55 1.57
 5 2 -10 9.32 1.67
 5 2 -10 6.61 1.29
 -5 2 10 10.59 1.38
 5 2 -10 10.63 1.51
 -5 2 10 9.68 1.76
 4 -2 -10 13.58 1.82
 4 -2 -10 13.56 1.93
 -4 -2 10 16.93 1.82
 4 2 -10 12.9 1.65
 -4 2 10 15.41 2.27
 4 2 -10 14.29 1.72
 4 2 -10 15.27 1.99
 3 -2 -10 4.38 1.05
 3 -2 -10 5 1.19
 3 2 -10 5.28 1.08
 3 2 -10 6.49 1.18
 -3 2 10 6.78 1.53
 3 2 -10 7.96 1.41
 2 -2 -10 0.51 0.7
 2 -2 -10 1.28 0.68
 2 2 -10 -0.27 0.49
 2 2 -10 1.46 0.65
 1 -2 -10 7.35 1.3
 1 -2 -10 10.59 1.88
 1 2 -10 8.08 1.54
 1 2 -10 11.89 1.47
 0 -2 -10 3.54 1.26
 0 -2 -10 4.3 1.06
 0 2 -10 2.99 0.79
 0 2 -10 4.93 1.3
 -1 -2 -10 0.05 0.49
 -1 2 -10 0.5 0.42
 -8 -3 10 5.43 1.49
 8 -3 -10 7.66 1.47
 8 3 -10 8.18 1.55
 -8 3 10 5.95 1.67
 7 -3 -10 5.97 1.32
 7 -3 -10 4.03 1.09
 -7 -3 10 7.76 1.64
 -7 -3 10 5.83 1.39
 -7 3 10 4.92 1.47
 7 3 -10 6.96 1.4
 7 3 -10 6.89 1.11
 7 3 -10 5.67 2.37
 6 -3 -10 4.16 1.14
 6 -3 -10 5.11 1.21
 -6 -3 10 2.38 0.79
 -6 3 10 3.8 0.83
 6 3 -10 4.1 0.96
 -6 3 10 2.78 1.2
 6 3 -10 1.52 0.79
 -5 -3 10 5.08 1.01
 5 -3 -10 1.62 0.85
 5 -3 -10 2.67 0.91
 5 3 -10 3.53 0.95
 -5 3 10 3.45 0.85
 -5 3 10 2.47 1.09
 5 3 -10 3.11 1.01
 4 -3 -10 3.67 1.07
 4 -3 -10 2.16 0.85
 -4 -3 10 1.6 0.62
 4 3 -10 0.93 0.66
 4 3 -10 1.85 0.76
 -4 3 10 1.08 0.85
 3 -3 -10 9 1.52
 3 -3 -10 12.89 1.93
 -3 3 10 13.27 2.28
 3 3 -10 12.39 1.68
 3 3 -10 13.25 1.82
 2 -3 -10 0.57 0.61
 2 -3 -10 0.45 0.65
 2 3 -10 0.04 0.48
 2 3 -10 0.11 0.42
 1 -3 -10 2.63 1
 1 -3 -10 4.58 1.07
 1 3 -10 6.47 1.11
 1 3 -10 4.29 1.12
 0 -3 -10 3.63 1.01
 0 -3 -10 3.74 1.28
 0 3 -10 5.21 0.95
 0 3 -10 2.14 0.96
 7 -4 -10 1.17 0.82
 7 -4 -10 1.01 0.76
 -7 -4 10 0.82 0.83
 7 4 -10 0.19 0.76
 7 4 -10 0.34 0.5
 -7 4 10 1.44 1.02
 6 -4 -10 0.66 0.62
 6 -4 -10 0.5 0.66
 -6 -4 10 0.22 0.69
 6 4 -10 0.42 0.56
 -6 4 10 0.42 0.5
 -6 4 10 1.56 1.03
 6 4 -10 -0.48 0.49
 5 -4 -10 3.74 1.14
 5 -4 -10 4.07 1.24
 -5 4 10 4.2 1.39
 5 4 -10 6.14 1.2
 5 4 -10 3.93 1.14
 4 -4 -10 7.66 1.6
 4 -4 -10 7.09 1.44
 4 4 -10 10.55 1.66
 -4 4 10 9.39 2.03
 4 4 -10 8.82 1.56
 3 -4 -10 1.01 0.76
 3 -4 -10 0.47 0.79
 3 4 -10 0.54 0.65
 -3 4 10 -0.51 0.58
 3 4 -10 -0.04 0.45
 2 -4 -10 2.52 1.03
 2 -4 -10 1.33 0.76
 2 4 -10 2.09 0.82
 2 4 -10 2.24 0.88
 1 -4 -10 13.09 2.18
 1 -4 -10 15.33 2.1
 1 4 -10 12.54 1.55
 1 4 -10 13.94 1.97
 0 -4 -10 11.71 1.81
 0 4 -10 15.37 1.66
 6 -5 -10 9.97 1.83
 6 -5 -10 4.14 1.21
 -6 5 10 7.07 1.96
 5 -5 -10 2.51 1
 5 -5 -10 0.73 0.8
 -5 5 10 2.31 1.25
 5 5 -10 2.13 0.9
 4 -5 -10 2.47 1.13
 4 -5 -10 2.28 0.94
 4 5 -10 1.4 0.73
 -4 5 10 2.32 1.23
 3 -5 -10 4.92 1.29
 3 -5 -10 2.53 1.18
 3 5 -10 6.54 1.41
 -3 5 10 2.66 1.25
 3 5 -10 5.21 1.22
 2 -5 -10 4.32 1.38
 2 -5 -10 2.78 1.16
 2 5 -10 3.23 1.01
 2 5 -10 2.42 1.05
 1 5 -10 7.5 1.3
 -7 0 11 6.51 1.65
 7 0 -11 9.23 1.7
 7 0 -11 9.13 1.61
 -6 0 11 8.03 1.67
 6 0 -11 5.22 1.17
 6 0 -11 8.76 1.53
 5 0 -11 0.57 0.91
 5 0 -11 1.34 0.7
 5 0 -11 0.68 0.6
 -5 0 11 1.76 0.87
 -4 0 11 8.53 1.49
 4 0 -11 9.83 1.59
 4 0 -11 11.35 1.63
 4 0 -11 6.1 1.41
 3 0 -11 1.13 0.88
 3 0 -11 2.21 0.8
 3 0 -11 3.05 1.02
 2 0 -11 1.03 0.72
 2 0 -11 0.67 0.55
 1 0 -11 0.7 0.72
 1 0 -11 0.06 0.43
 7 -1 -11 0.74 0.69
 -7 -1 11 0.06 0.67
 7 1 -11 2.26 0.93
 7 1 -11 1.33 0.72
 -7 1 11 0.38 0.77
 6 -1 -11 0.03 0.54
 -6 -1 11 0.59 0.7
 6 -1 -11 -0.03 0.47
 6 1 -11 0.77 0.99
 -6 1 11 0.57 0.88
 6 1 -11 -0.23 0.47
 6 1 -11 -0.32 0.45
 5 -1 -11 -0.09 0.48
 -5 -1 11 0.26 0.6
 5 -1 -11 1.39 0.76
 5 1 -11 -0.4 0.42
 5 1 -11 0.36 0.86
 -5 1 11 0 0.7
 5 1 -11 -0.03 0.52
 4 -1 -11 1.95 0.87
 -4 -1 11 3.23 1
 4 -1 -11 1.51 0.75
 4 1 -11 3.94 1.06
 -4 1 11 1.87 0.99
 4 1 -11 2.22 0.86
 3 -1 -11 0.55 0.54
 3 -1 -11 0.77 0.8
 3 -1 -11 1.93 0.88
 3 1 -11 0.45 0.55
 3 1 -11 0.95 0.69
 2 -1 -11 2.49 0.86
 2 -1 -11 3.79 1.15
 2 -1 -11 0.86 0.79
 2 1 -11 3.14 0.87
 2 1 -11 3.24 1.11
 1 -1 -11 2.37 1.09
 1 -1 -11 -0.54 0.5
 1 1 -11 0.65 0.74
 1 1 -11 0.23 0.5
 7 -2 -11 5.96 1.32
 -7 -2 11 10.5 1.74
 7 2 -11 7.38 1.4
 7 2 -11 12.14 2.08
 -7 2 11 10.27 2.13
 -6 -2 11 1.81 0.82
 6 -2 -11 0.23 0.57
 6 -2 -11 1.58 0.79
 6 2 -11 1.75 0.85
 6 2 -11 1.4 0.71
 -6 2 11 1.49 1.01
 -5 -2 11 1.56 0.75
 5 -2 -11 1.99 0.92
 5 -2 -11 2.27 0.88
 5 2 -11 1.82 0.77
 -5 2 11 1.62 1.1
 5 2 -11 2.45 0.96
 4 -2 -11 8.43 1.53
 4 -2 -11 7.98 1.6
 4 2 -11 5.88 1.21
 4 2 -11 8.95 1.46
 -4 2 11 11.62 2.09
 3 -2 -11 1.32 0.78
 3 -2 -11 2.75 1.08
 3 2 -11 3.72 0.99
 3 2 -11 1.44 0.74
 2 -2 -11 0.69 0.76
 2 -2 -11 0.91 0.61
 2 2 -11 1.26 0.86
 2 2 -11 0.86 0.63
 6 -3 -11 -0.01 0.7
 6 -3 -11 0.67 0.64
 6 3 -11 0.37 0.59
 -6 3 11 -0.13 0.79
 5 -3 -11 2.63 0.99
 5 -3 -11 1.51 0.77
 5 3 -11 2.95 0.94
 -5 3 11 1.8 1.12
 4 -3 -11 8.93 1.62
 4 -3 -11 6.1 1.46
 4 3 -11 10.73 1.69
 -4 3 11 5.31 1.55
 4 3 -11 6.77 1.32
 3 -3 -11 7.7 1.66
 3 3 -11 5.16 1.11
 3 3 -11 6.04 1.38
 2 -3 -11 3.94 1.25
 2 3 -11 6.05 1.34
 2 3 -11 5.52 1.14

_iucr_refine_instructions_details
;
TITL 2017_12_04cold_01m_a.res in P2(1)
    2017_12_04cold_0m.res
    created by SHELXL-2016/6 at 09:18:38 on 05-Dec-2017
REM Old TITL 2017_12_04cold_01m in P2(1)
REM SHELXT solution in P2(1)
REM R1 0.132, Rweak 0.024, Alpha 0.003, Orientation as input
REM Flack x = -9.990 ( 9.990 ) from Parsons' quotients
REM Formula found by SHELXT: C14 O3
CELL 0.56086 8.5919 9.104 9.673 90 114.391 90
ZERR 2 0.0014 0.0016 0.0017 0 0.004 0
LATT -1
SYMM -X,0.5+Y,-Z
SFAC C H O
UNIT 28 48 6

L.S. 10
PLAN  9
SIZE 0.11 0.13 0.17
TEMP -173.15
BOND $H
list 4
fmap 2
acta
REM <olex2.extras>
REM <HklSrc "%.\\2017_12_04cold_0m.hkl">
REM </olex2.extras>

WGHT    0.048100    0.189500
FVAR       0.45357
O1    3    0.344241    0.600120    0.564189    11.00000    0.01722    0.01652 =
         0.02355    0.00351    0.01107    0.00059
O2    3    0.460577    0.520239    0.294774    11.00000    0.03004    0.03246 =
         0.02441    0.00371    0.01265   -0.00539
O3    3    0.269743    0.342403    0.268656    11.00000    0.02100    0.02724 =
         0.01855   -0.00021    0.00445   -0.00191
C1    1    0.211204    0.529745    0.594057    11.00000    0.01929    0.01482 =
         0.02248   -0.00067    0.01203   -0.00188
AFIX  13
H1    2    0.190102    0.430396    0.545662    11.00000   -1.20000
AFIX   0
C2    1    0.267384    0.509886    0.764445    11.00000    0.02400    0.02060 =
         0.02203    0.00050    0.01290   -0.00148
AFIX  13
H2    2    0.177092    0.452379    0.780547    11.00000   -1.20000
AFIX   0
C3    1    0.432336    0.418839    0.825227    11.00000    0.02367    0.02365 =
         0.01961    0.00091    0.01044   -0.00121
AFIX  23
H3A   2    0.475729    0.411159    0.937011    11.00000   -1.20000
H3B   2    0.406699    0.318323    0.782733    11.00000   -1.20000
AFIX   0
C4    1    0.571085    0.486637    0.784283    11.00000    0.02152    0.02026 =
         0.01764   -0.00145    0.00767   -0.00250
AFIX  13
H4    2    0.603446    0.583084    0.838133    11.00000   -1.20000
AFIX   0
C5    1    0.501848    0.518024    0.614128    11.00000    0.01409    0.01707 =
         0.02251    0.00097    0.00901    0.00127
AFIX  13
H5    2    0.587129    0.583255    0.598945    11.00000   -1.20000
AFIX   0
C6    1    0.050653    0.623866    0.512763    11.00000    0.02250    0.01626 =
         0.02869    0.00011    0.01510    0.00079
AFIX  13
H6    2    0.079248    0.726316    0.552490    11.00000   -1.20000
AFIX   0
C7    1   -0.097434    0.571938    0.548587    11.00000    0.02446    0.02352 =
         0.03918    0.00270    0.01861    0.00482
AFIX 137
H7A   2   -0.117004    0.466908    0.525850    11.00000   -1.50000
H7B   2   -0.200879    0.626974    0.486592    11.00000   -1.50000
H7C   2   -0.069564    0.588568    0.656334    11.00000   -1.50000
AFIX   0
C8    1    0.006875    0.628970    0.345233    11.00000    0.02513    0.02424 =
         0.03149    0.00468    0.01384    0.00400
AFIX  43
H8    2    0.093731    0.662813    0.316313    11.00000   -1.20000
AFIX   0
C9    1   -0.139697    0.591251    0.234702    11.00000    0.03016    0.03511 =
         0.03146    0.00192    0.00904    0.00519
AFIX  93
H9A   2   -0.230689    0.556694    0.257623    11.00000   -1.20000
H9B   2   -0.154420    0.598602    0.132061    11.00000   -1.20000
AFIX   0
C10   1    0.481530    0.383334    0.514971    11.00000    0.01980    0.01614 =
         0.02029    0.00141    0.00889    0.00205
AFIX  23
H10A  2    0.594351    0.336460    0.542257    11.00000   -1.20000
H10B  2    0.405729    0.311285    0.533171    11.00000   -1.20000
AFIX   0
C11   1    0.407043    0.425428    0.350284    11.00000    0.01969    0.01975 =
         0.02367   -0.00197    0.01165    0.00183
C12   1    0.190955    0.375044    0.108378    11.00000    0.02801    0.04147 =
         0.02130    0.00335    0.00179    0.00159
AFIX 137
H12A  2    0.093730    0.309020    0.057985    11.00000   -1.50000
H12B  2    0.274636    0.361208    0.064829    11.00000   -1.50000
H12C  2    0.151004    0.477065    0.093499    11.00000   -1.50000
AFIX   0
C13   1    0.290905    0.656363    0.849323    11.00000    0.03510    0.02825 =
         0.02780   -0.00513    0.01599    0.00267
AFIX 137
H13A  2    0.364592    0.721102    0.821594    11.00000   -1.50000
H13B  2    0.343840    0.638355    0.958980    11.00000   -1.50000
H13C  2    0.179301    0.703149    0.821584    11.00000   -1.50000
AFIX   0
C14   1    0.731925    0.391439    0.840067    11.00000    0.02142    0.03040 =
         0.02215    0.00671    0.00781    0.00101
AFIX 137
H14A  2    0.702344    0.292448    0.797413    11.00000   -1.50000
H14B  2    0.781002    0.385870    0.951131    11.00000   -1.50000
H14C  2    0.815557    0.434960    0.807424    11.00000   -1.50000
AFIX   0
HKLF 4


REM  2017_12_04cold_01m_a.res in P2(1)
REM R1 =  0.0431 for    2308 Fo > 4sig(Fo)  and  0.0511 for all    2616 data
REM    158 parameters refined using      1 restraints

END  
     
WGHT      0.0479      0.1898 

REM Highest difference peak  0.140,  deepest hole -0.187,  1-sigma level  0.041
Q1    1   0.0025  0.6189  0.7430  11.00000  0.05    0.14
Q2    1   0.2605  0.8535  0.7463  11.00000  0.05    0.12
Q3    1  -0.1911  0.3556  0.5574  11.00000  0.05    0.12
Q4    1   0.5296  0.4973  0.6997  11.00000  0.05    0.12
Q5    1   0.1928  0.5486  0.0531  11.00000  0.05    0.12
Q6    1   0.4327  0.1971  0.9210  11.00000  0.05    0.12
Q7    1   0.0275  0.5215 -0.1013  11.00000  0.05    0.12
Q8    1   0.2842  0.2372  0.7141  11.00000  0.05    0.12
Q9    1   0.0529  0.1185  0.0457  11.00000  0.05    0.12

  REM The information below was added by Olex2.
  REM
  REM R1 = 0.0431 for 2308 Fo > 4sig(Fo) and 0.0511 for all 11717 data
  REM n/a parameters refined using n/a restraints
  REM Highest difference peak 0.14, deepest hole -0.19
  REM Mean Shift 0, Max Shift 0.000.

  REM +++ Tabular Listing of Refinement Information +++
  REM R1_all = 0.0511
  REM R1_gt = 0.0431
  REM wR_ref = 0.1030
  REM GOOF = 1.048
  REM Shift_max = 0.000
  REM Shift_mean = 0
  REM Reflections_all = 11717
  REM Reflections_gt = 2308
  REM Parameters = n/a
  REM Hole = -0.19
  REM Peak = 0.14
  REM Flack = -0.5(10)

  
;
_olex2_submission_special_instructions 'No special instructions were received'
