# Supplementary material for: Expanding the antibacterial selectivity of polyether ionophore antibiotics through diversity-focused semisynthesis
Source: Springer Nature journal article supplement (doi:10.1038/s41557-020-00601-1), 2020-12-22
Supplement: 41557_2020_601_MOESM32_ESM.fcf [file 41557_2020_601_MOESM32_ESM.fcf]

#
# h,k,l, Fc-squared, Fo-squared, sigma(Fo-squared), status flag
#
data_2017_12_04cold_0m
_shelx_title ' 2017_12_04cold_01m_a.res in P2(1)'
_shelx_refln_list_code          4
_shelx_F_calc_maximum       71.35
_exptl_crystal_F_000       264.00
_reflns_d_resolution_high  0.8201

loop_
 _space_group_symop_operation_xyz
 'x, y, z'
 '-x, y+1/2, -z'

_cell_length_a     8.5919
_cell_length_b     9.1040
_cell_length_c     9.6730
_cell_angle_alpha  90.000
_cell_angle_beta  114.391
_cell_angle_gamma  90.000

_shelx_F_squared_multiplier     1.000

loop_
 _refln_index_h
 _refln_index_k
 _refln_index_l
 _refln_F_squared_calc
 _refln_F_squared_meas
 _refln_F_squared_sigma
 _refln_observed_status
   0 -10   0        102.36        107.91         8.26 o
   1 -10   0         36.64         40.37         5.13 o
   2 -10   0         24.73         23.14         3.65 o
   3 -10   0          6.47          7.94         3.25 o
   4 -10   0         29.22         30.11         5.96 o
   1  -9   0         44.31         37.97         2.78 o
   2  -9   0          5.25          3.74         1.77 o
   3  -9   0         85.59         77.29         5.57 o
   4  -9   0         27.15         28.22         3.62 o
   5  -9   0         49.91         48.03         7.32 o
   0  -8   0        198.38        231.67         7.28 o
   1  -8   0         55.78         54.44         2.82 o
   2  -8   0         26.83         20.48         3.63 o
   3  -8   0         42.25         38.45         3.19 o
   4  -8   0        262.43        273.18         7.93 o
   5  -8   0          4.67          3.26         1.65 o
   6  -8   0         28.44         32.23         6.10 o
   1  -7   0        112.01        107.01         4.37 o
   2  -7   0        127.15        119.91         3.87 o
   3  -7   0         86.80         87.55         6.04 o
   4  -7   0        272.64        260.22         7.37 o
   5  -7   0         30.33         29.87         3.09 o
   6  -7   0         23.74         22.61         3.80 o
   7  -7   0          5.06         12.06         3.93 o
   0  -6   0         36.74         37.90         2.64 o
   1  -6   0        133.48        125.91         3.12 o
   2  -6   0         72.89         77.90         3.28 o
   3  -6   0        314.00        290.91         7.26 o
   4  -6   0        431.09        394.99         9.01 o
   5  -6   0         54.34         45.13         3.43 o
   6  -6   0          1.18          5.09         1.51 o
   7  -6   0         26.99         19.40         4.46 o
   8  -6   0          6.45          8.36         4.76 o
   1  -5   0         67.48         73.78         2.27 o
   2  -5   0        246.93        234.20         5.24 o
   3  -5   0        346.18        337.33         7.54 o
   4  -5   0         74.14         73.32         3.99 o
   5  -5   0         20.87         20.16         2.25 o
   6  -5   0         60.74         48.36         3.42 o
   7  -5   0         56.49         59.06         7.17 o
   8  -5   0         18.28         15.54         3.65 o
   0  -4   0       1206.85       1119.35        15.97 o
   1  -4   0        307.72        289.34         5.24 o
   2  -4   0        122.27        122.61         3.37 o
   3  -4   0        313.30        303.21         6.63 o
   4  -4   0          1.64         20.64         4.84 o
   5  -4   0         64.16         61.24         4.87 o
   6  -4   0         24.97         21.23         2.21 o
   7  -4   0         43.01         43.98         4.05 o
   8  -4   0         18.25         32.11         5.15 o
   1  -3   0        205.77        186.43         3.48 o
   2  -3   0        175.25        167.68         3.65 o
   3  -3   0        301.71        300.62         6.17 o
   4  -3   0        400.39        384.79         7.54 o
   5  -3   0          0.95          1.37         0.82 o
   6  -3   0         34.03         39.88         3.56 o
   7  -3   0         22.58         22.30         2.07 o
   8  -3   0         16.68         13.24         3.28 o
   9  -3   0         18.30         16.31         4.17 o
   0  -2   0       4955.97       4397.77        62.89 o
   1  -2   0       2542.87       2265.15        25.44 o
   2  -2   0        470.40        455.43         7.32 o
   3  -2   0       1028.19        974.58        12.49 o
   4  -2   0        210.80        212.50         5.63 o
   5  -2   0         23.38         26.22         2.12 o
   6  -2   0        139.87        133.77         3.51 o
   7  -2   0         35.82         33.44         2.06 o
   8  -2   0          0.65          1.71         1.45 o
   9  -2   0         42.72         36.01         5.68 o
   1  -1   0       1609.82       1423.91        17.57 o
   2  -1   0        975.74        899.73        12.19 o
   3  -1   0         51.59         51.42         2.37 o
   4  -1   0        355.42        360.94         7.99 o
   5  -1   0        152.35        149.02         3.33 o
   6  -1   0         37.50         38.77         2.88 o
   7  -1   0        107.82        104.08         4.85 o
   8  -1   0          5.88          4.00         1.59 o
   9  -1   0          4.38          3.91         2.23 o
   1   0   0       1303.51       1205.81        12.45 o
   2   0   0          0.32          0.58         0.52 o
   3   0   0        162.58        173.79         3.20 o
   4   0   0        359.30        385.20         6.85 o
   5   0   0         28.74         31.26         1.86 o
   6   0   0         22.03         23.33         1.87 o
   7   0   0         28.31         31.04         2.75 o
   8   0   0          1.38          0.80         0.78 o
   9   0   0          5.93          5.00         2.35 o
   1   1   0       1609.99       1459.25        15.03 o
   2   1   0        975.75        924.56        11.14 o
   3   1   0         51.66         54.69         1.63 o
   4   1   0        355.39        363.69         5.27 o
   5   1   0        152.51        156.49         3.12 o
   6   1   0         37.41         43.54         2.96 o
   7   1   0        107.75        106.16         4.03 o
   8   1   0          5.85          5.00         1.96 o
   9   1   0          4.40          6.43         2.36 o
   0   2   0       4955.66       4586.27        61.23 o
   1   2   0       2541.62       2357.52        22.97 o
   2   2   0        470.51        486.35         6.21 o
   3   2   0       1028.25       1079.43        12.42 o
   4   2   0        210.92        220.95         3.79 o
   5   2   0         23.39         24.33         1.38 o
   6   2   0        140.00        141.41         2.74 o
   7   2   0         35.85         29.62         3.99 o
   8   2   0          0.65          0.40         1.02 o
   9   2   0         42.75         39.43         6.23 o
   1   3   0        206.09        193.49         3.03 o
   2   3   0        175.30        181.80         3.06 o
   3   3   0        301.35        323.92         5.04 o
   4   3   0        400.13        420.00         6.27 o
   5   3   0          0.95          0.28         0.59 o
   6   3   0         34.00         33.89         1.58 o
   7   3   0         22.67         22.01         1.08 o
   8   3   0         16.65         11.59         3.42 o
   9   3   0         18.29         13.64         4.33 o
   0   4   0       1207.62       1176.06        18.77 o
   1   4   0        307.53        312.04         4.60 o
   2   4   0        122.19        126.32         3.05 o
   3   4   0        313.41        340.38         4.96 o
   4   4   0          1.63         20.30         2.69 o
   5   4   0         64.12         66.50         2.37 o
   6   4   0         24.97         22.81         2.61 o
   7   4   0         42.98         38.71         2.38 o
   8   4   0         18.22         28.22         2.86 o
   1   5   0         67.31         79.74         2.85 o
   2   5   0        247.04        254.29         4.68 o
   3   5   0        346.12        366.53         6.26 o
   4   5   0         74.26         80.44         2.36 o
   5   5   0         20.90         20.75         1.72 o
   6   5   0         60.65         58.73         2.61 o
   7   5   0         56.48         62.16         3.71 o
   8   5   0         18.24         19.72         7.07 o
   0   6   0         36.80         37.79         3.10 o
   1   6   0        133.50        133.28         3.25 o
   2   6   0         72.92         90.23         2.71 o
   3   6   0        314.24        335.76         6.30 o
   4   6   0        431.15        451.03         7.64 o
   5   6   0         54.37         54.96         3.20 o
   6   6   0          1.18          2.29         0.83 o
   7   6   0         26.88         29.17         3.80 o
   8   6   0          6.46          3.87         1.94 o
   1   7   0        112.20        116.45         3.41 o
   2   7   0        127.04        136.07         3.38 o
   3   7   0         86.86         97.91         3.83 o
   4   7   0        272.88        302.45         6.70 o
   5   7   0         30.33         32.09         2.84 o
   6   7   0         23.76         23.52         4.53 o
   7   7   0          5.05          7.32         2.25 o
   0   8   0        198.62        269.04         9.12 o
   1   8   0         55.84         65.10         4.00 o
   2   8   0         26.76         29.14         1.92 o
   3   8   0         42.26         44.25         3.53 o
   4   8   0        262.40        321.74         9.91 o
   5   8   0          4.69          4.75         2.21 o
   6   8   0         28.45         33.59         4.19 o
   1   9   0         44.30         44.55         4.81 o
   2   9   0          5.23          3.54         1.62 o
   3   9   0         85.67        101.65         6.27 o
   4   9   0         27.18         33.67         4.44 o
   5   9   0         49.83         57.18         5.62 o
   0  10   0        102.32         96.24        13.56 o
   1  10   0         36.61         49.45         5.26 o
   2  10   0         24.75         27.32         3.18 o
   3  10   0          6.48          7.40         2.85 o
   4  10   0         29.15         33.47         4.80 o
   1  11   0         70.05         74.95        14.78 o
  -4 -10   1          5.79          2.66         2.33 o
  -3 -10   1          1.03          0.54         1.96 o
  -2 -10   1          3.39         -0.01         4.18 o
  -1 -10   1         15.04         10.20         2.85 o
   0 -10   1         41.10         36.86         3.28 o
   1 -10   1         33.69         27.71         3.76 o
   2 -10   1          2.91          0.33         1.86 o
   3 -10   1          9.68          9.36         4.62 o
  -5  -9   1         44.51         37.27         4.75 o
  -4  -9   1         19.59         17.17         3.54 o
  -3  -9   1         25.30         21.97         2.77 o
  -2  -9   1        179.86        183.28         4.83 o
  -1  -9   1         81.38         75.92         4.89 o
   0  -9   1         34.20         29.66         2.64 o
   1  -9   1         13.72         13.99         1.99 o
   2  -9   1         28.59         23.98         3.58 o
   3  -9   1         32.22         21.98         3.77 o
   4  -9   1         52.07         60.70         8.49 o
   5  -9   1          0.27         -0.41         2.85 o
  -6  -8   1         41.39         37.61         4.79 o
  -5  -8   1         89.43         86.22         5.84 o
  -4  -8   1        145.64        138.90         5.88 o
  -3  -8   1        203.92        179.38         5.57 o
  -2  -8   1         78.32         74.30         2.83 o
  -1  -8   1         11.08          9.08         1.34 o
   0  -8   1         15.85         11.69         1.52 o
   1  -8   1         25.23         22.77         1.97 o
   2  -8   1         92.01         82.34         5.88 o
   3  -8   1         15.16         12.34         4.13 o
   4  -8   1         11.56          8.79         2.31 o
   5  -8   1          5.33          6.71         2.32 o
   6  -8   1         18.65         15.32         4.50 o
  -7  -7   1         28.51         31.45        12.64 o
  -6  -7   1          3.25          2.07         1.56 o
  -5  -7   1        104.10        112.30         5.52 o
  -4  -7   1        204.75        199.17         7.07 o
  -3  -7   1         56.08         49.40         3.64 o
  -2  -7   1        160.16        147.82         3.64 o
  -1  -7   1         50.43         48.92         2.36 o
   0  -7   1         40.74         36.21         2.11 o
   1  -7   1         26.64         27.53         2.47 o
   2  -7   1         23.24         22.27         2.21 o
   3  -7   1         25.69         27.64         3.08 o
   4  -7   1          2.51          0.48         1.20 o
   5  -7   1         15.69         14.93         2.31 o
   6  -7   1         15.26         14.66         3.51 o
  -8  -6   1         16.55         15.69         3.90 o
  -7  -6   1         23.11         25.01         4.08 o
  -6  -6   1         43.90         43.08         3.55 o
  -5  -6   1         38.99         41.86         3.37 o
  -4  -6   1        205.03        198.06         6.04 o
  -3  -6   1        342.11        318.47         7.71 o
  -2  -6   1         29.23         24.54         1.32 o
  -1  -6   1        209.19        194.62         3.88 o
   0  -6   1         31.87         34.55         1.93 o
   1  -6   1         14.22         13.60         1.25 o
   2  -6   1          5.90          5.36         1.13 o
   3  -6   1        149.49        149.10         5.32 o
   4  -6   1         19.12         15.89         2.25 o
   5  -6   1         33.68         36.86         3.18 o
   6  -6   1         26.57         21.70         3.16 o
   7  -6   1         21.86         18.65         4.50 o
  -8  -5   1         45.49         30.78         4.63 o
  -7  -5   1         69.37         58.67         3.95 o
  -6  -5   1         45.27         42.11         3.28 o
  -5  -5   1         19.66         21.51         2.32 o
  -4  -5   1         61.52         62.46         3.71 o
  -3  -5   1        119.16        116.52         4.22 o
  -2  -5   1        307.70        281.40         7.14 o
  -1  -5   1        164.40        150.52         4.48 o
   0  -5   1        116.27        118.48         2.95 o
   1  -5   1         71.18         79.37         2.35 o
   2  -5   1         34.14         29.58         2.15 o
   3  -5   1         46.31         48.03         2.73 o
   4  -5   1         93.88         79.72         3.95 o
   5  -5   1         65.50         64.78         3.62 o
   6  -5   1          1.26          2.45         1.47 o
   7  -5   1         11.12         10.87         3.46 o
   8  -5   1          4.89          2.77         3.65 o
  -9  -4   1         11.09         23.67         7.83 o
  -8  -4   1         15.31         18.06         3.59 o
  -7  -4   1         55.05         49.82         3.39 o
  -6  -4   1         55.88         46.20         3.80 o
  -5  -4   1        150.62        137.48         4.51 o
  -4  -4   1        184.25        184.28         5.27 o
  -3  -4   1       1380.02       1303.00        21.04 o
  -2  -4   1         39.49         42.09         3.12 o
  -1  -4   1         68.49         67.77         2.47 o
   0  -4   1        422.61        422.70         5.86 o
   1  -4   1        181.98        183.89         4.07 o
   2  -4   1        488.82        466.92         9.46 o
   3  -4   1         58.18         56.71         2.76 o
   4  -4   1         16.64         19.03         1.94 o
   5  -4   1         15.00          8.31         2.98 o
   6  -4   1         77.12         89.29         3.84 o
   7  -4   1         50.25         47.89         5.49 o
   8  -4   1         20.92         21.18         4.13 o
  -9  -3   1         19.75         18.46         3.52 o
  -8  -3   1         18.40         17.04         3.55 o
  -7  -3   1        267.70        245.06         5.45 o
  -6  -3   1         91.41        104.89         3.90 o
  -5  -3   1         51.21         48.01         2.42 o
  -4  -3   1        427.74        431.25         7.12 o
  -3  -3   1        142.06        144.84         3.22 o
  -2  -3   1         60.65         56.89         3.35 o
  -1  -3   1        121.82        110.82         2.49 o
   0  -3   1        427.78        412.54         5.35 o
   1  -3   1        231.35        215.91         4.16 o
   2  -3   1        252.97        243.50         4.60 o
   3  -3   1         98.91         96.54         3.78 o
   4  -3   1          6.38          2.19         1.66 o
   5  -3   1         23.58         25.79         2.03 o
   6  -3   1         46.18         40.92         2.41 o
   7  -3   1          6.10          4.12         1.29 o
   8  -3   1         10.62          9.58         2.97 o
  -9  -2   1         31.59         32.59         4.53 o
  -8  -2   1         20.48         24.23         2.00 o
  -7  -2   1        196.21        205.22         4.73 o
  -6  -2   1         46.58         47.81         2.29 o
  -5  -2   1         63.24         60.69         2.36 o
  -4  -2   1        195.00        202.01         3.99 o
  -3  -2   1       1228.97       1218.14        15.09 o
  -2  -2   1        283.19        268.90         4.68 o
  -1  -2   1       5091.10       4571.20        49.86 o
   0  -2   1       1968.04       1813.97        18.98 o
   1  -2   1        559.05        529.55         7.25 o
   2  -2   1        116.54        105.69         2.80 o
   3  -2   1       1036.28       1056.77        14.93 o
   4  -2   1         98.24        101.37         3.90 o
   5  -2   1         20.43         21.19         1.70 o
   6  -2   1         13.37         12.97         1.66 o
   7  -2   1          8.60          6.66         1.25 o
   8  -2   1         68.20         55.67         5.60 o
  -9  -1   1         37.87         33.02         7.46 o
  -8  -1   1          0.27          0.37         0.78 o
  -7  -1   1        120.92        117.00         3.43 o
  -6  -1   1        257.99        254.50         5.45 o
  -5  -1   1         52.19         50.60         1.98 o
  -4  -1   1         24.72         25.97         2.14 o
  -3  -1   1         39.02         34.00         1.41 o
  -2  -1   1        836.36        763.88         8.92 o
  -1  -1   1       1167.08       1026.85        10.97 o
   0  -1   1        440.12        372.96         5.31 o
   1  -1   1         78.86         64.29         1.69 o
   2  -1   1        816.36        759.47         9.28 o
   3  -1   1        180.41        175.57         3.53 o
   4  -1   1         18.53         18.82         1.80 o
   5  -1   1         47.30         45.31         2.59 o
   6  -1   1         22.86         19.80         1.71 o
   7  -1   1          5.63          4.78         1.69 o
   8  -1   1         12.91          8.65         2.61 o
   9  -1   1         18.90         16.85         3.67 o
  -9   0   1          6.98          2.87         3.15 o
  -8   0   1          3.99          2.16         0.92 o
  -7   0   1        134.48        130.56         3.60 o
  -6   0   1         94.94         95.14         3.68 o
  -5   0   1        495.88        484.01         7.21 o
  -4   0   1         66.80         73.09         2.04 o
  -3   0   1         63.21         67.14         1.72 o
  -2   0   1       2851.33       2586.69        28.86 o
  -1   0   1         16.51         14.97         0.57 o
   0   0   1       2648.28       2255.93        34.28 o
   1   0   1          0.05          0.14         0.26 o
   2   0   1        534.07        538.79         7.65 o
   3   0   1         80.09         83.28         2.67 o
   4   0   1         28.13         31.76         1.56 o
   5   0   1        105.18        108.43         3.33 o
   6   0   1          3.89          3.72         1.19 o
   7   0   1        162.57        160.74         4.63 o
   8   0   1         35.72         35.54         4.28 o
   9   0   1          0.01          1.44         1.96 o
  -9   1   1         37.83         31.43         5.91 o
  -8   1   1          0.28          0.02         0.75 o
  -7   1   1        121.06        120.72         3.42 o
  -6   1   1        257.76        262.59         4.59 o
  -5   1   1         52.20         53.67         1.75 o
  -4   1   1         24.70         25.07         1.20 o
  -3   1   1         38.97         35.29         1.43 o
  -2   1   1        836.20        786.64         8.92 o
  -1   1   1       1166.73       1042.53        13.21 o
   0   1   1        439.54        380.09         5.38 o
   1   1   1         78.73         67.60         1.65 o
   2   1   1        815.97        772.23         9.90 o
   3   1   1        180.59        182.42         3.67 o
   4   1   1         18.47         22.76         1.81 o
   5   1   1         47.30         48.87         2.73 o
   6   1   1         22.90         25.29         2.83 o
   7   1   1          5.61          3.56         1.16 o
   8   1   1         12.92          9.69         2.47 o
   9   1   1         18.87         16.76         3.37 o
  -9   2   1         31.55         34.54         2.60 o
  -8   2   1         20.49         22.71         2.30 o
  -7   2   1        196.18        204.98         4.19 o
  -6   2   1         46.47         47.19         3.06 o
  -5   2   1         63.24         65.39         2.34 o
  -4   2   1        195.07        221.99         4.68 o
  -3   2   1       1229.27       1267.43        14.40 o
  -2   2   1        283.37        272.88         4.04 o
  -1   2   1       5090.86       4659.12        50.76 o
   0   2   1       1968.04       1849.83        18.97 o
   1   2   1        558.88        547.25         7.19 o
   2   2   1        116.60        112.69         2.44 o
   3   2   1       1036.26       1091.92        14.38 o
   4   2   1         98.16         99.16         3.05 o
   5   2   1         20.47         20.97         1.58 o
   6   2   1         13.34         13.63         1.67 o
   7   2   1          8.59          8.09         1.33 o
   8   2   1         68.30         59.53         3.60 o
  -9   3   1         19.82         27.53         5.12 o
  -8   3   1         18.34         16.44         1.35 o
  -7   3   1        267.60        267.33         4.82 o
  -6   3   1         91.48        104.61         5.96 o
  -5   3   1         51.12         50.67         2.41 o
  -4   3   1        427.91        450.70         6.78 o
  -3   3   1        142.15        153.95         2.90 o
  -2   3   1         60.72         60.64         2.70 o
  -1   3   1        121.69        118.82         2.79 o
   0   3   1        427.65        423.64         7.12 o
   1   3   1        231.09        225.37         3.68 o
   2   3   1        252.97        266.57         5.75 o
   3   3   1         99.10        105.68         2.36 o
   4   3   1          6.38          5.31         0.64 o
   5   3   1         23.59         24.94         2.12 o
   6   3   1         46.09         48.93         3.85 o
   7   3   1          6.09          3.57         1.14 o
   8   3   1         10.62          5.06         1.65 o
  -9   4   1         11.06          9.67         6.46 o
  -8   4   1         15.34         15.83         1.92 o
  -7   4   1         55.07         59.31         2.68 o
  -6   4   1         55.76         56.17         2.57 o
  -5   4   1        150.66        146.99         3.31 o
  -4   4   1        184.20        186.17         3.57 o
  -3   4   1       1380.41       1449.62        17.39 o
  -2   4   1         39.50         40.72         2.27 o
  -1   4   1         68.54         73.12         2.49 o
   0   4   1        422.45        431.78         6.08 o
   1   4   1        182.05        198.42         3.47 o
   2   4   1        488.70        509.25         6.80 o
   3   4   1         58.18         62.99         2.12 o
   4   4   1         16.62         18.18         1.30 o
   5   4   1         15.03         16.69         1.21 o
   6   4   1         77.13         89.96         2.08 o
   7   4   1         50.29         50.21         3.34 o
   8   4   1         20.97         25.69         2.89 o
  -8   5   1         45.45         50.39         3.58 o
  -7   5   1         69.39         63.58         2.75 o
  -6   5   1         45.25         43.42         2.19 o
  -5   5   1         19.61         20.45         1.37 o
  -4   5   1         61.62         64.39         2.93 o
  -3   5   1        119.18        131.32         4.06 o
  -2   5   1        307.54        301.71         5.52 o
  -1   5   1        164.43        174.69         3.51 o
   0   5   1        116.59        126.07         3.15 o
   1   5   1         71.21         86.68         2.47 o
   2   5   1         34.16         38.65         1.75 o
   3   5   1         46.32         50.93         2.24 o
   4   5   1         93.85         92.21         2.79 o
   5   5   1         65.51         71.46         2.54 o
   6   5   1          1.27          2.49         0.81 o
   7   5   1         11.13          7.90         2.16 o
   8   5   1          4.92          4.12         2.69 o
  -8   6   1         16.54         16.08         2.93 o
  -7   6   1         23.09         29.95         2.92 o
  -6   6   1         43.90         43.90         2.88 o
  -5   6   1         39.07         42.26         3.83 o
  -4   6   1        204.91        208.43         4.88 o
  -3   6   1        342.00        349.44         6.51 o
  -2   6   1         29.26         29.40         2.11 o
  -1   6   1        209.33        220.27         4.33 o
   0   6   1         31.86         41.22         2.28 o
   1   6   1         14.13         17.19         1.43 o
   2   6   1          5.88          5.28         0.91 o
   3   6   1        149.68        152.13         3.39 o
   4   6   1         19.16         18.71         1.24 o
   5   6   1         33.59         45.41         2.50 o
   6   6   1         26.59         27.04         2.58 o
   7   6   1         21.80         25.12         5.20 o
  -7   7   1         28.49         30.77         3.90 o
  -6   7   1          3.26          5.67         2.95 o
  -5   7   1        103.99        113.04         4.50 o
  -4   7   1        204.69        225.12         5.74 o
  -3   7   1         56.11         60.23         3.23 o
  -2   7   1        159.98        168.32         4.52 o
  -1   7   1         50.53         56.29         2.56 o
   0   7   1         40.63         42.13         3.26 o
   1   7   1         26.65         32.66         2.02 o
   2   7   1         23.22         25.17         1.76 o
   3   7   1         25.67         24.25         2.19 o
   4   7   1          2.49          2.25         1.22 o
   5   7   1         15.64         18.90         3.27 o
   6   7   1         15.21         17.60         3.13 o
  -6   8   1         41.46         37.43         6.10 o
  -5   8   1         89.40         94.36         5.87 o
  -4   8   1        145.46        162.46         6.64 o
  -3   8   1        203.91        226.38         6.90 o
  -2   8   1         78.18         94.33         4.76 o
  -1   8   1         11.09          9.96         2.52 o
   0   8   1         15.88         17.33         1.99 o
   1   8   1         25.25         25.47         2.13 o
   2   8   1         92.00         99.71         3.79 o
   3   8   1         15.13         17.31         2.37 o
   4   8   1         11.54          5.89         1.82 o
   5   8   1          5.32          5.66         2.25 o
   6   8   1         18.67         19.29         3.17 o
  -5   9   1         44.45         45.66         5.10 o
  -4   9   1         19.59         19.21         3.27 o
  -3   9   1         25.26         26.53         3.04 o
  -2   9   1        179.89        196.37         6.67 o
  -1   9   1         81.53         98.88         6.18 o
   0   9   1         34.26         37.07         3.16 o
   1   9   1         13.75         15.99         2.13 o
   2   9   1         28.60         32.81         3.16 o
   3   9   1         32.16         33.58         3.63 o
   4   9   1         52.12         55.15         5.33 o
   5   9   1          0.28          0.42         1.76 o
  -4  10   1          5.79          8.21         2.82 o
  -3  10   1          1.04          0.04         1.67 o
  -2  10   1          3.38          2.10         1.93 o
  -1  10   1         15.05         13.36         3.18 o
   0  10   1         41.16         45.17        19.93 o
   1  10   1         33.72         32.56         3.88 o
   2  10   1          2.90          2.16         1.64 o
   3  10   1          9.72          8.96         2.71 o
  -4 -10   2         24.59         19.63         4.46 o
  -3 -10   2          6.26          6.98         3.16 o
  -2 -10   2         26.88         23.28         3.12 o
  -1 -10   2         15.83         12.00         2.35 o
   0 -10   2         10.64         11.63         2.35 o
   1 -10   2         48.62         49.13         6.45 o
   2 -10   2         44.71         35.00        11.35 o
   3 -10   2         37.61         23.96         6.81 o
  -6  -9   2         22.97         17.15         4.96 o
  -5  -9   2         12.11          9.32         3.00 o
  -4  -9   2         18.22         12.91         4.20 o
  -3  -9   2         18.66         11.41         2.61 o
  -2  -9   2         64.66         62.25         3.33 o
  -1  -9   2         98.47         96.01         4.12 o
   0  -9   2         52.21         47.54         3.29 o
   1  -9   2          7.62          5.18         2.65 o
   2  -9   2         16.77         15.80         3.10 o
   3  -9   2         61.82         60.87         6.15 o
   4  -9   2         56.95         49.53         7.33 o
  -7  -8   2         36.05         32.49         6.00 o
  -6  -8   2         25.27         25.07         4.19 o
  -5  -8   2          5.36          2.13         1.79 o
  -4  -8   2         10.75          8.53         2.57 o
  -3  -8   2        129.21        120.71         5.70 o
  -2  -8   2         44.83         42.88         2.51 o
  -1  -8   2         36.88         32.68         2.75 o
   0  -8   2          1.29          1.60         0.98 o
   1  -8   2         54.67         55.16         3.93 o
   2  -8   2        118.24        118.15         5.76 o
   3  -8   2         14.46          8.41         2.33 o
   4  -8   2          9.45          8.27         2.28 o
   5  -8   2          0.14          0.95         2.76 o
  -7  -7   2         16.96         17.64         3.18 o
  -6  -7   2         27.02         25.11         3.23 o
  -5  -7   2         23.44         20.80         2.68 o
  -4  -7   2         43.59         38.32         3.32 o
  -3  -7   2        328.66        311.31         7.48 o
  -2  -7   2          0.75          0.32         0.70 o
  -1  -7   2         44.15         37.11         2.28 o
   0  -7   2          5.99          5.27         1.60 o
   1  -7   2        117.41        118.25         4.19 o
   2  -7   2         26.79         20.30         2.06 o
   3  -7   2        208.95        190.99         7.56 o
   4  -7   2         26.51         22.85         3.03 o
   5  -7   2         55.38         52.31         4.74 o
   6  -7   2         11.87          4.49         2.53 o
  -8  -6   2         16.84         13.36         4.88 o
  -7  -6   2         10.98          4.71         2.28 o
  -6  -6   2         61.75         58.46         6.66 o
  -5  -6   2        100.84         90.92         4.70 o
  -4  -6   2        292.19        270.57         8.09 o
  -3  -6   2        260.79        256.56         7.55 o
  -2  -6   2        111.19        101.40         5.00 o
  -1  -6   2         30.17         26.26         1.83 o
   0  -6   2        212.58        203.13         6.11 o
   1  -6   2        127.75        125.29         6.37 o
   2  -6   2          0.16         -0.51         0.68 o
   3  -6   2        170.17        160.15         5.17 o
   4  -6   2         11.05          9.01         1.75 o
   5  -6   2         22.90         20.64         2.94 o
   6  -6   2          0.32         -0.41         1.77 o
   7  -6   2          5.70          4.18         4.03 o
  -9  -5   2         39.03         37.28        13.85 o
  -8  -5   2         13.13          8.91         2.85 o
  -7  -5   2         57.06         50.92         4.14 o
  -6  -5   2         52.94         47.65         3.28 o
  -5  -5   2        137.50        129.91         4.83 o
  -4  -5   2        271.48        276.74         6.98 o
  -3  -5   2         44.98         43.07         2.80 o
  -2  -5   2          9.97          8.92         1.13 o
  -1  -5   2        160.27        153.02         3.54 o
   0  -5   2        373.69        376.94         6.14 o
   1  -5   2        203.54        197.64         4.73 o
   2  -5   2         29.40         29.32         2.19 o
   3  -5   2         10.30         10.16         1.80 o
   4  -5   2         11.58         17.29         2.21 o
   5  -5   2          7.05          3.56         3.19 o
   6  -5   2          9.32          6.50         2.65 o
   7  -5   2          5.21          1.44         2.57 o
  -9  -4   2         14.86         11.43         4.58 o
  -8  -4   2         63.84         65.34         3.70 o
  -7  -4   2         11.84         15.65         1.75 o
  -6  -4   2         10.20         10.79         1.37 o
  -5  -4   2         32.46         32.95         2.05 o
  -4  -4   2        157.06        152.36         3.69 o
  -3  -4   2         81.27         77.18         2.49 o
  -2  -4   2        192.07        182.43         4.11 o
  -1  -4   2        205.60        218.25         4.06 o
   0  -4   2        321.41        334.76         5.33 o
   1  -4   2        348.69        338.40         6.18 o
   2  -4   2        390.10        396.36         7.79 o
   3  -4   2          5.98          4.62         1.33 o
   4  -4   2         20.21         19.25         3.60 o
   5  -4   2         19.92         20.74         3.31 o
   6  -4   2         24.43         14.91         3.75 o
   7  -4   2         62.51         62.93         7.42 o
   8  -4   2         13.49         13.66         5.69 o
  -9  -3   2          6.82          3.91         4.06 o
  -8  -3   2         14.59         15.23         1.82 o
  -7  -3   2         28.99         30.84         2.21 o
  -6  -3   2        176.68        167.46         6.24 o
  -5  -3   2         56.05         59.60         2.53 o
  -4  -3   2        388.96        402.29         6.53 o
  -3  -3   2        222.24        213.17         4.00 o
  -2  -3   2         18.90         20.67         1.47 o
  -1  -3   2        639.52        616.44         9.71 o
   0  -3   2        797.98        764.47         9.33 o
   1  -3   2         68.59         65.82         2.45 o
   2  -3   2         83.51         84.62         2.90 o
   3  -3   2         39.24         37.17         2.40 o
   4  -3   2         74.57         66.75         5.23 o
   5  -3   2         72.08         68.28        14.58 o
   6  -3   2         11.14          4.12         2.37 o
   7  -3   2         14.75         11.98         3.00 o
   8  -3   2         64.80         70.05        10.29 o
  -9  -2   2          1.71          2.14         2.19 o
  -8  -2   2         39.44         41.87         2.64 o
  -7  -2   2         57.36         53.71         2.83 o
  -6  -2   2        145.88        142.35         3.75 o
  -5  -2   2         88.55         85.32         3.51 o
  -4  -2   2         38.98         45.43         2.12 o
  -3  -2   2       1387.29       1318.62        15.11 o
  -2  -2   2       1338.68       1273.91        14.30 o
  -1  -2   2        809.76        776.04        12.07 o
   0  -2   2        439.97        426.48        12.21 o
   1  -2   2        211.45        210.12         4.22 o
   2  -2   2        173.63        171.95         4.22 o
   3  -2   2        358.82        360.88         8.14 o
   4  -2   2         17.14         21.72         3.45 o
   5  -2   2          4.88          7.37         2.22 o
   6  -2   2        146.00        137.89         7.34 o
   7  -2   2         46.85         39.73         4.85 o
   8  -2   2          8.65          4.64         3.12 o
 -10  -1   2         20.97         30.04         7.78 o
  -9  -1   2          3.00          2.97         3.04 o
  -8  -1   2         20.67         18.35         1.73 o
  -7  -1   2        662.42        669.17        10.08 o
  -6  -1   2        100.75        103.71         3.00 o
  -5  -1   2         51.29         47.68         2.49 o
  -4  -1   2        214.80        220.84         4.04 o
  -3  -1   2        518.51        528.86         7.79 o
  -2  -1   2        216.65        197.56         3.21 o
  -1  -1   2        887.82        835.80        10.07 o
   0  -1   2         37.48         34.41         1.57 o
   1  -1   2        213.42        205.89         4.58 o
   2  -1   2         22.43         26.13         1.76 o
   3  -1   2         40.38         45.95         9.04 o
   4  -1   2         22.44         20.76         3.02 o
   5  -1   2        146.85        149.78        10.34 o
   6  -1   2        280.33        259.68        13.32 o
   7  -1   2         88.79         74.34         6.62 o
   8  -1   2         13.19          5.88         2.65 o
 -10   0   2          7.63          6.37         4.57 o
  -9   0   2          8.76          7.79         3.65 o
  -8   0   2         72.42         78.62         2.98 o
  -7   0   2        431.01        438.33         7.82 o
  -6   0   2        701.69        705.40         9.91 o
  -5   0   2        140.14        138.36         3.03 o
  -4   0   2        203.32        195.27         4.24 o
  -3   0   2        604.72        573.78         8.24 o
  -2   0   2       1060.51        954.15        10.66 o
  -1   0   2        958.49        854.17         8.67 o
   0   0   2        603.81        562.50         7.53 o
   1   0   2        121.56        120.96         2.56 o
   2   0   2         25.65         30.16         1.91 o
   3   0   2        389.84        369.27         5.81 o
   4   0   2         94.14         99.93         2.37 o
   5   0   2         28.79         30.29         1.44 o
   6   0   2          0.35          0.73         0.54 o
   7   0   2        448.26        455.62         8.02 o
   8   0   2         11.48          3.90         3.65 o
 -10   1   2         21.04         25.96         6.95 o
  -9   1   2          2.98          1.31         2.58 o
  -8   1   2         20.66         18.65         1.70 o
  -7   1   2        662.43        703.87        10.72 o
  -6   1   2        100.81        106.28         2.51 o
  -5   1   2         51.22         50.87         1.53 o
  -4   1   2        214.99        233.74         3.66 o
  -3   1   2        519.04        529.50         6.40 o
  -2   1   2        216.62        198.88         3.19 o
  -1   1   2        888.13        840.99        10.12 o
   0   1   2         37.52         38.39         1.67 o
   1   1   2        213.17        204.02         4.38 o
   2   1   2         22.41         24.45         1.47 o
   3   1   2         40.36         41.44         2.08 o
   4   1   2         22.47         20.96         2.09 o
   5   1   2        146.90        143.87         3.55 o
   6   1   2        280.26        280.59         5.57 o
   7   1   2         88.74         93.95         3.39 o
   8   1   2         13.18         10.97         1.94 o
  -9   2   2          1.73          4.62         2.99 o
  -8   2   2         39.38         45.01         2.19 o
  -7   2   2         57.39         56.50         2.11 o
  -6   2   2        145.84        151.53         3.45 o
  -5   2   2         88.43         88.09         2.49 o
  -4   2   2         38.94         44.07         1.70 o
  -3   2   2       1387.78       1401.37        15.75 o
  -2   2   2       1339.07       1301.79        15.87 o
  -1   2   2        809.27        801.78        11.28 o
   0   2   2        440.33        443.11         8.58 o
   1   2   2        211.73        224.48         4.23 o
   2   2   2        173.37        183.30         3.26 o
   3   2   2        358.63        373.92         6.45 o
   4   2   2         17.10         14.45         1.30 o
   5   2   2          4.90          6.06         0.98 o
   6   2   2        146.09        153.65         4.17 o
   7   2   2         46.85         49.46         3.39 o
   8   2   2          8.61          6.47         2.32 o
  -9   3   2          6.82          4.23         2.77 o
  -8   3   2         14.64         15.64         2.33 o
  -7   3   2         28.97         27.08         1.95 o
  -6   3   2        176.75        185.84         4.12 o
  -5   3   2         56.07         62.34         2.99 o
  -4   3   2        389.43        424.40         6.46 o
  -3   3   2        221.91        216.71         4.87 o
  -2   3   2         18.87         18.11         1.46 o
  -1   3   2        639.59        635.69         9.95 o
   0   3   2        797.67        810.54        10.92 o
   1   3   2         68.48         68.60         1.90 o
   2   3   2         83.41         89.19         2.34 o
   3   3   2         39.21         35.37         1.45 o
   4   3   2         74.49         78.95         3.10 o
   5   3   2         71.99         77.13         3.87 o
   6   3   2         11.11         13.41         1.64 o
   7   3   2         14.71         16.84         2.13 o
   8   3   2         64.88         66.85        10.81 o
  -9   4   2         14.88         19.30         5.34 o
  -8   4   2         63.85         67.53         3.36 o
  -7   4   2         11.87         16.39         1.74 o
  -6   4   2         10.21         14.76         1.66 o
  -5   4   2         32.51         34.44         2.81 o
  -4   4   2        156.92        171.37         4.44 o
  -3   4   2         81.17         75.06         3.14 o
  -2   4   2        192.13        193.00         4.21 o
  -1   4   2        205.56        219.41         4.49 o
   0   4   2        321.22        361.39         6.40 o
   1   4   2        348.52        369.04         5.41 o
   2   4   2        389.78        429.25         6.10 o
   3   4   2          6.01          4.71         1.19 o
   4   4   2         20.15         21.67         1.38 o
   5   4   2         19.91         17.83         2.04 o
   6   4   2         24.50         25.38         2.80 o
   7   4   2         62.54         71.23         5.69 o
   8   4   2         13.51         17.25         3.23 o
  -9   5   2         38.99         39.41         6.68 o
  -8   5   2         13.11         10.99         1.76 o
  -7   5   2         57.06         60.57         2.72 o
  -6   5   2         52.88         51.34         2.28 o
  -5   5   2        137.47        151.25         4.78 o
  -4   5   2        271.57        291.79         6.76 o
  -3   5   2         44.95         45.38         2.59 o
  -2   5   2          9.97          9.20         2.01 o
  -1   5   2        160.18        166.95         3.92 o
   0   5   2        373.36        404.51         8.13 o
   1   5   2        203.40        218.11         4.13 o
   2   5   2         29.42         36.09         1.88 o
   3   5   2         10.31         10.58         1.13 o
   4   5   2         11.58         11.72         1.16 o
   5   5   2          7.07          8.74         1.14 o
   6   5   2          9.31          7.43         2.18 o
   7   5   2          5.21          2.57         1.89 o
  -8   6   2         16.86         17.79         2.68 o
  -7   6   2         10.97         10.49         1.97 o
  -6   6   2         61.76         64.89         3.40 o
  -5   6   2        100.84        108.81         4.78 o
  -4   6   2        292.15        317.40         6.62 o
  -3   6   2        260.97        270.41         7.17 o
  -2   6   2        111.30        118.28         3.67 o
  -1   6   2         30.18         28.02         2.05 o
   0   6   2        212.40        231.19         5.30 o
   1   6   2        127.42        134.08         3.30 o
   2   6   2          0.16          1.20         0.80 o
   3   6   2        170.19        179.44         3.96 o
   4   6   2         11.05         13.01         1.26 o
   5   6   2         22.88         23.55         2.19 o
   6   6   2          0.32          0.13         0.97 o
   7   6   2          5.69          8.17         5.54 o
  -7   7   2         17.04         12.37         2.69 o
  -6   7   2         26.95         24.79         2.42 o
  -5   7   2         23.50         23.45         2.65 o
  -4   7   2         43.59         45.83         2.97 o
  -3   7   2        328.78        345.55         6.88 o
  -2   7   2          0.75          0.10         0.84 o
  -1   7   2         44.29         51.05         3.66 o
   0   7   2          6.01          3.48         1.12 o
   1   7   2        117.50        131.31         3.50 o
   2   7   2         26.80         29.89         1.99 o
   3   7   2        208.97        220.53         5.20 o
   4   7   2         26.53         26.64         1.85 o
   5   7   2         55.31         56.32         4.65 o
   6   7   2         11.91         11.52         2.38 o
  -7   8   2         36.06         38.20         4.74 o
  -6   8   2         25.35         26.94         4.12 o
  -5   8   2          5.35          8.01         1.95 o
  -4   8   2         10.78         12.48         2.35 o
  -3   8   2        129.15        144.90         5.82 o
  -2   8   2         44.79         46.87         4.16 o
  -1   8   2         36.86         39.80         3.14 o
   0   8   2          1.30          1.01         1.26 o
   1   8   2         54.79         62.23         4.17 o
   2   8   2        118.38        123.63         4.16 o
   3   8   2         14.50         13.75         1.77 o
   4   8   2          9.40          6.64         2.14 o
   5   8   2          0.14          1.71         1.66 o
  -6   9   2         22.99         28.90         4.44 o
  -5   9   2         12.10         10.18         2.82 o
  -4   9   2         18.25         17.56         2.98 o
  -3   9   2         18.68         18.71         2.71 o
  -2   9   2         64.66         67.26         6.75 o
  -1   9   2         98.51        106.64         7.18 o
   0   9   2         52.19         55.91         4.56 o
   1   9   2          7.59          4.15         1.67 o
   2   9   2         16.72         16.98         2.40 o
   3   9   2         61.86         80.81         8.52 o
   4   9   2         56.99         55.53         5.14 o
  -4  10   2         24.62         28.44         4.83 o
  -3  10   2          6.24          5.82         2.52 o
  -2  10   2         26.80         27.07         3.72 o
  -1  10   2         15.83         15.20         3.11 o
   0  10   2         10.59          5.03         3.65 o
   1  10   2         48.60         58.01         5.99 o
   2  10   2         44.75         50.94         5.37 o
   3  10   2         37.66         42.07         6.42 o
  -4 -10   3         12.01          6.05         3.42 o
  -3 -10   3         33.18         27.08         4.23 o
  -2 -10   3         17.32         14.82         6.88 o
  -1 -10   3         76.92         82.47         5.83 o
   0 -10   3         81.84         86.04         5.34 o
   1 -10   3          1.30          4.77         2.90 o
   2 -10   3         50.81         33.00         7.29 o
  -6  -9   3         19.95         15.24         4.42 o
  -5  -9   3          1.46         -0.37         2.02 o
  -4  -9   3         15.91         20.71         3.36 o
  -3  -9   3         62.86         60.58         4.72 o
  -2  -9   3         12.92         10.40         1.98 o
  -1  -9   3         23.45         21.08         3.15 o
   0  -9   3          2.01          1.41         1.32 o
   1  -9   3          8.80          9.32         2.41 o
   2  -9   3         52.46         42.97         6.22 o
   3  -9   3         23.68         29.24         5.65 o
  -7  -8   3         27.42         28.43         6.12 o
  -6  -8   3         22.48         23.89         5.10 o
  -5  -8   3         13.29          6.05         6.42 o
  -4  -8   3          0.40          1.48         2.01 o
  -3  -8   3         85.72         79.16         3.77 o
  -2  -8   3         18.87         14.33         1.86 o
  -1  -8   3          7.38          4.99         1.29 o
   0  -8   3         15.12         12.88         1.91 o
   1  -8   3         13.12          9.94         2.06 o
   2  -8   3        155.52        144.35         8.09 o
   3  -8   3         45.64         36.06         7.23 o
   4  -8   3         61.19         52.45        11.79 o
   5  -8   3          3.47          6.37         3.72 o
  -8  -7   3          1.15          2.15         3.37 o
  -7  -7   3          4.90          6.63         2.03 o
  -6  -7   3          8.42          4.12         1.79 o
  -5  -7   3          8.08          6.50         2.80 o
  -4  -7   3         99.82         88.44         5.00 o
  -3  -7   3         64.51         58.14         2.77 o
  -2  -7   3         52.59         47.36         3.31 o
  -1  -7   3         68.66         65.34         4.37 o
   0  -7   3          5.56          6.27         1.12 o
   1  -7   3         26.04         20.49         2.05 o
   2  -7   3         59.59         58.32         4.35 o
   3  -7   3         46.39         33.46         5.09 o
   4  -7   3         68.53         58.21         5.68 o
   5  -7   3          7.19          2.18         2.78 o
  -8  -6   3         18.88         19.05         4.05 o
  -7  -6   3          5.21          4.00         2.16 o
  -6  -6   3         64.05         69.12         4.56 o
  -5  -6   3        148.01        145.64         8.48 o
  -4  -6   3         91.38         92.68         4.84 o
  -3  -6   3         91.58         98.39         2.75 o
  -2  -6   3          5.02          4.18         0.95 o
  -1  -6   3         47.53         46.41         2.30 o
   0  -6   3         74.25         81.76         2.94 o
   1  -6   3         38.37         35.13         2.47 o
   2  -6   3         43.28         37.79         2.69 o
   3  -6   3          2.57          2.52         1.33 o
   4  -6   3         30.22         21.67         2.76 o
   5  -6   3          2.84          3.57         2.22 o
   6  -6   3          9.61          2.17         2.85 o
  -9  -5   3          1.23         -0.20         2.99 o
  -8  -5   3         48.32         47.67         3.89 o
  -7  -5   3         38.81         34.86         2.54 o
  -6  -5   3         65.44         60.88         2.82 o
  -5  -5   3        106.93        113.72         3.66 o
  -4  -5   3        114.93        112.77         3.46 o
  -3  -5   3         57.81         51.51         2.38 o
  -2  -5   3          6.46          4.59         0.93 o
  -1  -5   3         11.09         10.90         1.15 o
   0  -5   3        291.69        283.35         5.14 o
   1  -5   3         86.80         85.09         3.30 o
   2  -5   3         44.40         43.10         2.74 o
   3  -5   3        201.11        193.77         6.40 o
   4  -5   3        131.93        142.56         5.59 o
   5  -5   3         22.57         12.66         3.59 o
   6  -5   3          2.86          1.66         4.18 o
   7  -5   3         80.33         97.41        13.08 o
  -9  -4   3          2.09          2.74         3.31 o
  -8  -4   3          1.89          0.11         0.98 o
  -7  -4   3         84.54         86.34         3.70 o
  -6  -4   3         10.34          4.02         1.07 o
  -5  -4   3        201.58        191.38         4.81 o
  -4  -4   3        812.24        801.53        11.05 o
  -3  -4   3        452.81        446.39         6.99 o
  -2  -4   3        109.23        101.17         3.93 o
  -1  -4   3        225.01        230.06         4.57 o
   0  -4   3        391.35        375.48         6.48 o
   1  -4   3        146.65        136.73         4.03 o
   2  -4   3        188.96        179.71         4.85 o
   3  -4   3         89.02         87.14         4.06 o
   4  -4   3        129.23        128.30         5.40 o
   5  -4   3         42.99         36.46         6.51 o
   6  -4   3         17.90         17.89         4.05 o
   7  -4   3         17.28          5.71         2.95 o
  -9  -3   3         17.45         11.81         2.94 o
  -8  -3   3         91.88         98.46         3.94 o
  -7  -3   3         12.18         11.39         1.54 o
  -6  -3   3         62.95         70.10         2.96 o
  -5  -3   3        102.67        107.51         3.62 o
  -4  -3   3        629.79        643.77         9.16 o
  -3  -3   3         35.58         36.21         1.80 o
  -2  -3   3        126.52        135.39         3.40 o
  -1  -3   3         72.76         71.73         2.16 o
   0  -3   3        769.05        761.78        13.26 o
   1  -3   3          9.77          8.15         1.22 o
   2  -3   3        270.58        257.50         6.28 o
   3  -3   3        533.45        512.54        11.69 o
   4  -3   3         26.66         32.04         2.45 o
   5  -3   3          3.48         -0.70         2.14 o
   6  -3   3         94.31        100.54         8.76 o
   7  -3   3        170.70        165.60         9.69 o
 -10  -2   3          2.59          5.93         4.81 o
  -9  -2   3         39.48         38.22         4.99 o
  -8  -2   3        125.38        115.22         3.83 o
  -7  -2   3        165.38        164.19         4.29 o
  -6  -2   3         35.27         36.24         2.97 o
  -5  -2   3        159.69        159.58         4.20 o
  -4  -2   3        676.94        687.00         9.34 o
  -3  -2   3        368.84        378.02         5.79 o
  -2  -2   3        953.47        935.16        11.11 o
  -1  -2   3        281.87        277.21         4.49 o
   0  -2   3         22.14         23.28         1.85 o
   1  -2   3        209.14        203.72         5.44 o
   2  -2   3          3.57          4.36         0.92 o
   3  -2   3         61.99         61.29         2.91 o
   4  -2   3         84.69         74.79         6.44 o
   5  -2   3          1.70         -0.21         2.38 o
   6  -2   3        165.21        164.80         9.23 o
   7  -2   3         49.56         57.91         6.78 o
 -10  -1   3          4.72          0.74         3.09 o
  -9  -1   3         16.50         12.84         3.30 o
  -8  -1   3        128.87        122.49         3.79 o
  -7  -1   3        335.00        325.10         7.09 o
  -6  -1   3         28.06         26.96         2.11 o
  -5  -1   3        109.86        129.64         3.84 o
  -4  -1   3        979.53       1026.64        13.93 o
  -3  -1   3         58.01         60.26         1.90 o
  -2  -1   3         98.81         93.35         2.64 o
  -1  -1   3         95.44         90.87         2.68 o
   0  -1   3       1176.80       1132.31        16.74 o
   1  -1   3        313.57        307.25         6.70 o
   2  -1   3         28.87         30.24         2.44 o
   3  -1   3        139.51        140.88         3.98 o
   4  -1   3         39.77         43.14         8.63 o
   5  -1   3        137.96        137.69         8.11 o
   6  -1   3         78.20         77.73        11.80 o
   7  -1   3         30.83         37.35         4.85 o
   8  -1   3          5.76          4.32         2.82 o
 -10   0   3         11.27          7.59         3.83 o
  -9   0   3          0.46          0.13         1.30 o
  -8   0   3        177.53        190.26         5.76 o
  -7   0   3         88.19         89.94         3.80 o
  -6   0   3         24.65         24.27         1.99 o
  -5   0   3          0.41          3.13         1.12 o
  -4   0   3         17.04         25.31         1.96 o
  -3   0   3         26.66         24.90         1.37 o
  -2   0   3       2398.05       2293.93        23.97 o
  -1   0   3         30.62         30.14         1.34 o
   0   0   3       1063.80       1047.94        13.66 o
   1   0   3         39.83         41.68         2.50 o
   2   0   3         94.39        100.43         2.58 o
   3   0   3          4.54          6.27         0.90 o
   4   0   3         31.69         28.96         2.06 o
   5   0   3        107.62        107.46         2.73 o
   6   0   3         14.65         12.39         3.18 o
   7   0   3         11.84         12.75         3.03 o
   8   0   3          0.28          1.96         1.99 o
 -10   1   3          4.68          1.11         3.09 o
  -9   1   3         16.53         10.14         3.03 o
  -8   1   3        128.92        132.81         8.12 o
  -7   1   3        334.78        354.10         7.49 o
  -6   1   3         27.99         25.79         1.20 o
  -5   1   3        109.93        122.19         2.80 o
  -4   1   3        979.68       1045.68        13.56 o
  -3   1   3         58.09         61.20         3.34 o
  -2   1   3         98.70         95.21         2.33 o
  -1   1   3         95.59         94.86         2.17 o
   0   1   3       1177.43       1158.75        16.59 o
   1   1   3        313.36        323.72         5.86 o
   2   1   3         28.85         31.31         1.40 o
   3   1   3        139.46        144.71         3.82 o
   4   1   3         39.84         43.30         2.05 o
   5   1   3        137.92        148.82         3.71 o
   6   1   3         78.13         80.91         2.93 o
   7   1   3         30.84         35.07         2.75 o
   8   1   3          5.77          4.75         2.38 o
 -10   2   3          2.58          3.69         3.84 o
  -9   2   3         39.47         45.50         4.62 o
  -8   2   3        125.31        124.85         4.34 o
  -7   2   3        165.25        169.91         3.12 o
  -6   2   3         35.24         37.82         1.72 o
  -5   2   3        159.71        167.62         3.45 o
  -4   2   3        677.09        712.37        11.15 o
  -3   2   3        368.88        386.13         8.06 o
  -2   2   3        953.57        960.62        12.36 o
  -1   2   3        282.04        289.57         4.69 o
   0   2   3         22.18         24.51         1.54 o
   1   2   3        209.12        210.14         5.23 o
   2   2   3          3.58          4.38         0.62 o
   3   2   3         61.97         63.52         2.68 o
   4   2   3         84.69         88.69         3.01 o
   5   2   3          1.70          1.32         0.77 o
   6   2   3        165.13        173.26         5.22 o
   7   2   3         49.60         51.02         6.99 o
  -9   3   3         17.49         15.85         3.06 o
  -8   3   3         92.06        102.54         4.05 o
  -7   3   3         12.14         14.79         1.40 o
  -6   3   3         62.89         68.25         2.60 o
  -5   3   3        102.62        115.89         3.01 o
  -4   3   3        630.02        696.44         9.39 o
  -3   3   3         35.63         39.65         2.42 o
  -2   3   3        126.59        140.71         3.81 o
  -1   3   3         72.91         75.15         2.69 o
   0   3   3        768.89        797.84        13.22 o
   1   3   3          9.76          6.94         0.99 o
   2   3   3        270.41        261.41         4.76 o
   3   3   3        533.75        552.11         7.86 o
   4   3   3         26.68         27.71         2.31 o
   5   3   3          3.49          1.93         0.94 o
   6   3   3         94.23         98.71         3.64 o
   7   3   3        170.65        181.26         8.34 o
  -9   4   3          2.07          1.31         1.79 o
  -8   4   3          1.89          3.88         1.27 o
  -7   4   3         84.59         88.62         3.19 o
  -6   4   3         10.30          7.70         1.12 o
  -5   4   3        201.56        215.32         4.48 o
  -4   4   3        812.44        871.79        12.91 o
  -3   4   3        452.75        487.01         8.42 o
  -2   4   3        109.33        103.00         3.37 o
  -1   4   3        224.70        233.44         5.57 o
   0   4   3        391.35        419.43        10.07 o
   1   4   3        146.81        147.06         3.20 o
   2   4   3        188.86        198.85         4.31 o
   3   4   3         88.94         96.40         2.84 o
   4   4   3        129.19        131.82         2.73 o
   5   4   3         43.00         30.10         2.63 o
   6   4   3         17.94         16.05         2.69 o
   7   4   3         17.30          9.22         3.18 o
  -9   5   3          1.23          2.13         2.20 o
  -8   5   3         48.31         53.13         3.18 o
  -7   5   3         38.76         33.57         2.26 o
  -6   5   3         65.60         65.81         3.75 o
  -5   5   3        106.93        117.88         4.15 o
  -4   5   3        115.00        118.08         4.02 o
  -3   5   3         57.91         56.39         3.13 o
  -2   5   3          6.47         10.23         1.35 o
  -1   5   3         11.11         11.34         1.42 o
   0   5   3        291.80        318.02         6.99 o
   1   5   3         86.88         90.88         2.73 o
   2   5   3         44.44         44.07         2.44 o
   3   5   3        201.17        201.89         4.71 o
   4   5   3        131.74        145.02         3.52 o
   5   5   3         22.58         24.93         1.49 o
   6   5   3          2.86          3.49         2.49 o
   7   5   3         80.40         78.25         7.49 o
  -8   6   3         18.93         23.34         3.24 o
  -7   6   3          5.20          4.58         1.39 o
  -6   6   3         63.95         68.25         3.78 o
  -5   6   3        147.92        163.67         4.77 o
  -4   6   3         91.30        104.83         4.10 o
  -3   6   3         91.62        109.49         4.15 o
  -2   6   3          5.02          5.60         1.23 o
  -1   6   3         47.46         49.35         3.54 o
   0   6   3         74.18         83.50         3.55 o
   1   6   3         38.43         37.49         2.25 o
   2   6   3         43.25         49.95         2.52 o
   3   6   3          2.57          0.53         0.82 o
   4   6   3         30.22         32.74         2.38 o
   5   6   3          2.86          2.02         1.06 o
   6   6   3          9.63          5.20         4.03 o
  -8   7   3          1.14          0.07         1.84 o
  -7   7   3          4.87          3.32         1.57 o
  -6   7   3          8.38          7.04         2.75 o
  -5   7   3          8.08          9.27         1.77 o
  -4   7   3         99.95        103.41         5.17 o
  -3   7   3         64.55         63.88         3.60 o
  -2   7   3         52.55         48.97         2.93 o
  -1   7   3         68.70         71.92         4.44 o
   0   7   3          5.52          4.79         1.24 o
   1   7   3         26.08         27.46         2.83 o
   2   7   3         59.48         71.16         3.36 o
   3   7   3         46.41         44.67         2.85 o
   4   7   3         68.48         78.81         4.24 o
   5   7   3          7.20          9.36         2.12 o
  -7   8   3         27.45         33.19         4.56 o
  -6   8   3         22.44         24.62         3.93 o
  -5   8   3         13.28         17.79         2.71 o
  -4   8   3          0.40          0.19         1.20 o
  -3   8   3         85.66         95.15         5.93 o
  -2   8   3         18.87         20.48         2.35 o
  -1   8   3          7.35          7.71         1.68 o
   0   8   3         15.14         14.21         3.54 o
   1   8   3         13.19          7.90         2.76 o
   2   8   3        155.52        164.85         5.15 o
   3   8   3         45.58         48.03         5.71 o
   4   8   3         61.15         56.81         4.81 o
   5   8   3          3.46          4.66         2.30 o
  -6   9   3         20.02         17.09         3.65 o
  -5   9   3          1.47          2.42         1.86 o
  -4   9   3         15.87         21.03         3.16 o
  -3   9   3         62.78         77.51         5.12 o
  -2   9   3         12.90         14.44         2.78 o
  -1   9   3         23.51         20.73         3.07 o
   0   9   3          2.00          3.42         1.65 o
   1   9   3          8.80         10.54         2.25 o
   2   9   3         52.36         57.79         5.52 o
   3   9   3         23.73         23.34         4.55 o
  -4  10   3         12.01         20.46         5.25 o
  -3  10   3         33.19         33.41         4.90 o
  -2  10   3         17.25         14.42         2.92 o
  -1  10   3         76.97         94.11         8.27 o
   0  10   3         81.84        112.11         8.47 o
   1  10   3          1.30          1.79         3.43 o
   2  10   3         50.78         51.34         6.94 o
  -4 -10   4          7.28          3.50         2.58 o
  -3 -10   4         79.96         75.32         6.74 o
  -2 -10   4         50.96         53.13         5.62 o
  -1 -10   4         87.82         83.33         6.56 o
   0 -10   4         18.86         17.92         3.66 o
   1 -10   4          0.02          1.56         3.31 o
  -6  -9   4         20.35         16.49         3.62 o
  -5  -9   4         30.57         22.80         4.59 o
  -4  -9   4          9.50          5.61         2.05 o
  -3  -9   4         24.66         20.99         2.84 o
  -2  -9   4          8.64          6.99         1.60 o
  -1  -9   4         22.60         18.04         2.58 o
   0  -9   4         34.88         31.38         7.19 o
   1  -9   4          5.09          4.69         2.40 o
   2  -9   4         28.56         24.47         5.02 o
   3  -9   4          3.36          9.33         5.44 o
  -7  -8   4         12.42          5.24         2.52 o
  -6  -8   4         19.42         16.45         3.30 o
  -5  -8   4         61.48         66.23         7.22 o
  -4  -8   4        111.96        153.60         9.05 o
  -3  -8   4         28.91         28.49         2.42 o
  -2  -8   4         74.75         66.59         3.39 o
  -1  -8   4         15.44         16.77         2.13 o
   0  -8   4        122.00        144.15         5.70 o
   1  -8   4         25.58         21.84         3.18 o
   2  -8   4         11.08          6.61         2.47 o
   3  -8   4         10.70          5.48         4.93 o
   4  -8   4         21.31         20.22         5.04 o
  -8  -7   4          0.99         -3.69         3.69 o
  -7  -7   4         28.94         30.79         4.43 o
  -6  -7   4         52.26         42.51         4.90 o
  -5  -7   4         37.96         30.43         3.42 o
  -4  -7   4        130.34        114.00         7.11 o
  -3  -7   4        163.59        149.84         5.79 o
  -2  -7   4          2.07          1.82         0.92 o
  -1  -7   4         18.90         16.89         1.74 o
   0  -7   4         16.23          8.78         1.68 o
   1  -7   4         32.84         30.67         3.17 o
   2  -7   4         11.13          8.49         1.96 o
   3  -7   4         23.00         17.70         3.07 o
   4  -7   4         73.27         50.26         7.04 o
   5  -7   4          6.98          1.93         2.97 o
  -8  -6   4          8.59          7.90         2.85 o
  -7  -6   4         76.99         69.81         6.64 o
  -6  -6   4        221.09        213.53         7.64 o
  -5  -6   4        105.76        104.37         3.83 o
  -4  -6   4         88.04         82.93         3.23 o
  -3  -6   4         13.00         13.80         1.62 o
  -2  -6   4         31.11         29.38         1.96 o
  -1  -6   4         46.46         51.91         2.33 o
   0  -6   4         28.78         26.85         1.99 o
   1  -6   4         69.44         63.37         3.74 o
   2  -6   4         98.29         92.32         4.31 o
   3  -6   4        146.85        138.91         8.98 o
   4  -6   4         68.71         59.24         5.78 o
   5  -6   4         23.25         31.99         5.91 o
  -9  -5   4          3.58          0.46         2.98 o
  -8  -5   4         18.08         14.58         2.60 o
  -7  -5   4         35.54         30.98         3.00 o
  -6  -5   4         68.75         61.44         3.35 o
  -5  -5   4        141.31        132.55         3.85 o
  -4  -5   4         66.76         62.07         3.01 o
  -3  -5   4        120.74        113.22         3.81 o
  -2  -5   4         68.52         66.93         3.10 o
  -1  -5   4         88.05         76.39         2.40 o
   0  -5   4         32.22         29.26         3.06 o
   1  -5   4         20.72         22.40         2.34 o
   2  -5   4        180.27        183.28         7.67 o
   3  -5   4         93.95         91.16         4.81 o
   4  -5   4         15.00         13.62         2.46 o
   5  -5   4         12.68          8.22         3.33 o
   6  -5   4         43.83         50.49         7.25 o
  -9  -4   4         29.98         27.12         5.60 o
  -8  -4   4         26.29         31.43         2.83 o
  -7  -4   4        239.84        234.64         7.25 o
  -6  -4   4         84.47         82.15         3.86 o
  -5  -4   4        175.20        173.02         4.67 o
  -4  -4   4         27.10         44.63         2.25 o
  -3  -4   4         17.24         18.96         1.51 o
  -2  -4   4         81.80         87.05         3.41 o
  -1  -4   4         48.81         47.81         2.88 o
   0  -4   4        157.13        169.25         4.79 o
   1  -4   4         30.85         30.72         2.49 o
   2  -4   4        107.36        109.67         5.15 o
   3  -4   4        179.03        170.15         5.55 o
   4  -4   4          1.84          1.03         1.16 o
   5  -4   4         10.50          7.36         3.16 o
   6  -4   4         28.75         26.55         5.23 o
 -10  -3   4          4.44          3.84         4.47 o
  -9  -3   4        113.98        123.62         7.83 o
  -8  -3   4         10.33         11.10         1.96 o
  -7  -3   4        122.06        109.76         6.07 o
  -6  -3   4          0.14          1.87         0.86 o
  -5  -3   4        141.92        138.22         3.67 o
  -4  -3   4          3.48          1.65         0.74 o
  -3  -3   4        155.26        151.94         3.49 o
  -2  -3   4        184.27        181.83         4.05 o
  -1  -3   4        102.02        114.15         3.52 o
   0  -3   4          7.09          5.90         1.23 o
   1  -3   4        102.10        102.63         3.46 o
   2  -3   4         75.93         78.49         3.52 o
   3  -3   4        311.71        301.32         7.22 o
   4  -3   4         16.81         21.41         3.03 o
   5  -3   4          5.80          2.08         2.17 o
   6  -3   4         84.21         82.22         8.33 o
   7  -3   4         19.63         29.41         7.24 o
 -10  -2   4         28.58         22.99         5.45 o
  -9  -2   4         44.18         43.63         3.87 o
  -8  -2   4         77.41         74.00         3.93 o
  -7  -2   4        175.13        178.54         5.20 o
  -6  -2   4         15.08         17.47         1.82 o
  -5  -2   4          1.91          0.31         0.88 o
  -4  -2   4        145.50        145.65         3.44 o
  -3  -2   4        147.93        134.32         3.09 o
  -2  -2   4         83.90         78.99         2.38 o
  -1  -2   4        331.13        333.47         6.70 o
   0  -2   4          1.93          1.73         1.09 o
   1  -2   4         13.94         17.68         1.72 o
   2  -2   4         21.56         18.08         1.74 o
   3  -2   4          2.15          2.41         1.28 o
   4  -2   4        269.95        272.66         7.05 o
   5  -2   4         68.00         75.63         7.37 o
   6  -2   4         21.08         20.76         4.34 o
   7  -2   4          9.51          6.52         4.71 o
 -10  -1   4         87.73        102.06        10.70 o
  -9  -1   4         81.70         84.81         4.97 o
  -8  -1   4         11.81          7.59         2.85 o
  -7  -1   4         77.77         74.11         3.62 o
  -6  -1   4         12.12         12.98         1.59 o
  -5  -1   4        137.79        150.10         4.10 o
  -4  -1   4         78.91         83.00         2.42 o
  -3  -1   4         73.06         71.17         2.93 o
  -2  -1   4        138.10        133.28         2.80 o
  -1  -1   4        588.09        585.81         8.80 o
   0  -1   4       3244.95       3251.27        49.08 o
   1  -1   4        382.61        383.94         8.44 o
   2  -1   4         32.55         36.88         2.14 o
   3  -1   4        232.62        230.22         5.17 o
   4  -1   4        190.64        197.73         5.38 o
   5  -1   4         64.45         51.81        14.36 o
   6  -1   4        148.83        142.84         8.32 o
   7  -1   4          3.11          1.68         2.07 o
 -10   0   4         89.33         98.42        16.96 o
  -9   0   4          1.23          1.15         1.53 o
  -8   0   4          4.00         21.64         2.97 o
  -7   0   4        195.70        197.69         7.09 o
  -6   0   4         54.02         64.89         3.63 o
  -5   0   4        111.71        121.99         3.65 o
  -4   0   4         40.91         42.64         1.75 o
  -3   0   4          0.07         -0.36         0.45 o
  -2   0   4        109.47         98.29         2.25 o
  -1   0   4        924.31        909.81        11.41 o
   0   0   4         63.71        105.91         2.71 o
   1   0   4        487.47        512.17         8.76 o
   2   0   4        106.77         96.12         2.81 o
   3   0   4          7.09          4.13         1.53 o
   4   0   4         15.84         18.09         1.85 o
   5   0   4         97.93         97.01         2.66 o
   6   0   4         30.62         26.32         4.03 o
   7   0   4          5.48          4.65         2.64 o
 -10   1   4         87.87         87.19         9.40 o
  -9   1   4         81.82         85.24         6.39 o
  -8   1   4         11.82         13.05         1.90 o
  -7   1   4         77.85         76.67         3.54 o
  -6   1   4         12.04         15.50         1.79 o
  -5   1   4        137.89        144.42         4.70 o
  -4   1   4         78.89         84.74         2.38 o
  -3   1   4         73.04         73.31         2.15 o
  -2   1   4        138.13        138.94         3.10 o
  -1   1   4        587.60        587.86         7.48 o
   0   1   4       3244.58       3394.77        41.86 o
   1   1   4        382.29        379.83         7.00 o
   2   1   4         32.56         33.82         1.72 o
   3   1   4        232.73        245.00         6.79 o
   4   1   4        190.84        203.95         5.14 o
   5   1   4         64.48         60.00         3.78 o
   6   1   4        148.93        163.54         5.57 o
   7   1   4          3.12          1.06         2.08 o
 -10   2   4         28.64         28.40         5.73 o
  -9   2   4         44.18         44.09         4.55 o
  -8   2   4         77.41         76.35         2.85 o
  -7   2   4        175.09        180.31         4.21 o
  -6   2   4         15.12         18.46         1.20 o
  -5   2   4          1.90          1.03         0.56 o
  -4   2   4        145.43        149.71         3.36 o
  -3   2   4        147.80        141.44         3.46 o
  -2   2   4         83.87         82.44         2.44 o
  -1   2   4        331.05        339.17         5.47 o
   0   2   4          1.93          1.91         0.67 o
   1   2   4         13.89         21.27         1.86 o
   2   2   4         21.51         20.54         1.57 o
   3   2   4          2.17          3.44         1.06 o
   4   2   4        269.91        283.78         6.98 o
   5   2   4         68.03         75.89         4.53 o
   6   2   4         21.05         22.69         2.71 o
   7   2   4          9.57         10.18         4.68 o
 -10   3   4          4.47          3.06         3.11 o
  -9   3   4        113.99        132.98         6.86 o
  -8   3   4         10.32          8.67         1.13 o
  -7   3   4        122.10        118.01         3.57 o
  -6   3   4          0.14         -0.06         0.58 o
  -5   3   4        141.91        150.33         4.29 o
  -4   3   4          3.50          3.56         0.86 o
  -3   3   4        155.39        147.29         4.12 o
  -2   3   4        184.51        191.83         5.95 o
  -1   3   4        101.98        120.04         3.57 o
   0   3   4          7.11          2.96         1.40 o
   1   3   4        101.95        106.03         3.32 o
   2   3   4         75.87         78.88         2.80 o
   3   3   4        311.87        319.69         5.22 o
   4   3   4         16.83         17.81         1.76 o
   5   3   4          5.80          4.44         1.31 o
   6   3   4         84.28         90.42         6.06 o
   7   3   4         19.59         28.59         4.20 o
  -9   4   4         29.99         32.70         3.98 o
  -8   4   4         26.27         30.69         2.16 o
  -7   4   4        239.71        263.74         5.66 o
  -6   4   4         84.43         86.54         3.51 o
  -5   4   4        175.19        179.17         4.71 o
  -4   4   4         27.16         44.53         2.66 o
  -3   4   4         17.24         19.75         1.90 o
  -2   4   4         81.59         97.53         3.59 o
  -1   4   4         48.86         49.30         2.90 o
   0   4   4        157.07        175.55         5.11 o
   1   4   4         30.89         30.08         3.39 o
   2   4   4        107.40        113.58         3.16 o
   3   4   4        178.92        195.44         5.67 o
   4   4   4          1.83          2.57         1.40 o
   5   4   4         10.52          7.36         1.82 o
   6   4   4         28.67         29.18         3.99 o
  -9   5   4          3.59          1.42         2.61 o
  -8   5   4         18.06         19.59         2.43 o
  -7   5   4         35.47         30.24         2.21 o
  -6   5   4         68.69         67.16         3.90 o
  -5   5   4        141.41        145.61         4.52 o
  -4   5   4         66.75         72.82         3.75 o
  -3   5   4        120.88        121.22         4.10 o
  -2   5   4         68.64         68.90         5.22 o
  -1   5   4         88.00         90.33         3.65 o
   0   5   4         32.23         35.69         3.85 o
   1   5   4         20.72         21.32         1.50 o
   2   5   4        180.17        195.57         4.19 o
   3   5   4         93.94        100.23         3.38 o
   4   5   4         15.04         15.82         1.45 o
   5   5   4         12.70         12.50         4.05 o
   6   5   4         43.90         55.37         5.17 o
  -8   6   4          8.62         11.38         2.82 o
  -7   6   4         77.01         82.38         4.59 o
  -6   6   4        220.90        242.83         6.88 o
  -5   6   4        105.62        126.14         5.06 o
  -4   6   4         88.09         92.20         4.45 o
  -3   6   4         13.00         12.03         1.75 o
  -2   6   4         31.10         33.80         2.58 o
  -1   6   4         46.45         56.45         3.38 o
   0   6   4         28.70         29.49         2.36 o
   1   6   4         69.44         68.12         3.83 o
   2   6   4         98.21        101.03         3.52 o
   3   6   4        146.89        161.66         4.49 o
   4   6   4         68.91         59.76         4.77 o
   5   6   4         23.37         25.47         1.84 o
  -8   7   4          0.99          0.44         1.97 o
  -7   7   4         28.94         32.41         3.21 o
  -6   7   4         52.34         55.34         3.67 o
  -5   7   4         38.01         39.00         3.60 o
  -4   7   4        130.30        129.86         4.80 o
  -3   7   4        163.52        164.81         5.24 o
  -2   7   4          2.08          2.47         1.13 o
  -1   7   4         18.91         20.01         2.01 o
   0   7   4         16.27         10.57         1.99 o
   1   7   4         32.83         36.39         3.33 o
   2   7   4         11.16         13.54         1.74 o
   3   7   4         23.06         19.77         2.24 o
   4   7   4         73.28         70.95         4.44 o
   5   7   4          6.97          7.34         2.14 o
  -7   8   4         12.42         13.08         3.36 o
  -6   8   4         19.41         16.95         2.79 o
  -5   8   4         61.51         71.20         5.21 o
  -4   8   4        112.05        165.20         6.78 o
  -3   8   4         28.91         28.23         3.05 o
  -2   8   4         74.56         79.27         5.05 o
  -1   8   4         15.39         15.33         2.54 o
   0   8   4        122.01        161.50         6.58 o
   1   8   4         25.63         26.85         3.04 o
   2   8   4         11.11         10.84         1.85 o
   3   8   4         10.73          8.58         2.99 o
   4   8   4         21.34         27.96         4.98 o
  -6   9   4         20.38         22.98         8.73 o
  -5   9   4         30.58         36.71         4.12 o
  -4   9   4          9.49          6.93         3.13 o
  -3   9   4         24.69         30.10         4.51 o
  -2   9   4          8.61          5.48         2.14 o
  -1   9   4         22.60         23.55         3.25 o
   0   9   4         34.93         32.76         3.64 o
   1   9   4          5.11          2.72         2.51 o
   2   9   4         28.58         26.16         4.91 o
   3   9   4          3.37          4.54         2.51 o
  -4  10   4          7.27          4.10         3.48 o
  -3  10   4         79.97         93.09        10.20 o
  -2  10   4         50.97         64.69         5.74 o
  -1  10   4         87.88        119.16        26.00 o
   0  10   4         18.87         12.23         3.97 o
   1  10   4          0.02          3.16         4.13 o
  -2 -10   5          5.28          4.11         2.26 o
  -1 -10   5         87.63         96.87        15.85 o
  -5  -9   5         47.84         38.32         4.29 o
  -4  -9   5         60.95         60.89         5.17 o
  -3  -9   5          1.51         -0.07         1.86 o
  -2  -9   5         12.26         11.19         2.23 o
  -1  -9   5         65.80         61.18         4.68 o
   0  -9   5         24.30         24.96         3.93 o
   1  -9   5          0.82         -0.22         1.97 o
   2  -9   5          1.54          3.21         3.69 o
  -7  -8   5         13.23          7.51         3.49 o
  -6  -8   5          3.77          2.05         2.08 o
  -5  -8   5         46.28         42.08         4.25 o
  -4  -8   5         83.44         81.78         6.55 o
  -3  -8   5         19.87         18.31         1.89 o
  -2  -8   5         73.78         62.41         4.45 o
  -1  -8   5         37.04         40.74         3.66 o
   0  -8   5         12.22         11.55         2.83 o
   1  -8   5         10.56          8.32         2.69 o
   2  -8   5          8.48          7.98         3.46 o
   3  -8   5          8.49          5.95         3.62 o
  -8  -7   5         28.81         23.04         8.07 o
  -7  -7   5          8.68          5.37         2.46 o
  -6  -7   5         20.85         18.82         3.05 o
  -5  -7   5          6.57          4.61         1.28 o
  -4  -7   5         36.94         32.02         2.38 o
  -3  -7   5        108.12         93.33         3.53 o
  -2  -7   5         39.39         38.37         3.93 o
  -1  -7   5         17.28         14.84         1.18 o
   0  -7   5         24.03         27.49         5.38 o
   1  -7   5         34.42         31.38         5.42 o
   2  -7   5         14.97         10.88         3.69 o
   3  -7   5         27.12         21.18         4.10 o
   4  -7   5          1.41         -0.43         2.74 o
  -8  -6   5         25.92         28.31         3.56 o
  -7  -6   5         10.37          8.66         2.24 o
  -6  -6   5          2.55          1.95         1.07 o
  -5  -6   5          8.62          7.54         1.29 o
  -4  -6   5         45.55         45.76         2.82 o
  -3  -6   5        101.61         95.29         4.68 o
  -2  -6   5         39.37         38.52         2.16 o
  -1  -6   5        156.34        155.89         4.76 o
   0  -6   5          9.38          9.17         2.49 o
   1  -6   5        107.16         99.81         5.44 o
   2  -6   5         50.21         41.19         8.73 o
   3  -6   5          1.55          0.54         1.69 o
   4  -6   5          2.96          2.88         2.86 o
   5  -6   5          8.32          5.98         5.15 o
  -9  -5   5          0.94         -0.20         5.44 o
  -8  -5   5          9.86          6.89         2.05 o
  -7  -5   5         81.16         70.25         4.03 o
  -6  -5   5         51.39         48.85         3.06 o
  -5  -5   5         40.52         40.83         3.17 o
  -4  -5   5         29.86         28.02         2.09 o
  -3  -5   5        150.42        145.75         4.34 o
  -2  -5   5         13.86         12.76         1.24 o
  -1  -5   5         23.24         21.00         2.63 o
   0  -5   5         38.12         47.33         3.27 o
   1  -5   5          5.45          4.12         1.28 o
   2  -5   5        204.47        214.99         6.93 o
   3  -5   5         12.17         10.51         1.93 o
   4  -5   5         21.05         19.38         4.09 o
   5  -5   5          4.00          4.11         2.76 o
  -9  -4   5         11.09          5.02         2.42 o
  -8  -4   5         27.27         22.68         2.95 o
  -7  -4   5        167.34        148.60         6.31 o
  -6  -4   5         47.68         51.59         2.96 o
  -5  -4   5         34.75         31.45         2.21 o
  -4  -4   5         69.62         64.49         2.85 o
  -3  -4   5         31.90         32.01         2.25 o
  -2  -4   5          9.74          9.67         1.12 o
  -1  -4   5         23.48         20.64         2.33 o
   0  -4   5        159.57        156.39         6.06 o
   1  -4   5         10.58          7.91         1.46 o
   2  -4   5         19.71         22.35         2.20 o
   3  -4   5        126.54        120.13         6.59 o
   4  -4   5         72.00         70.73         4.36 o
   5  -4   5         25.88         24.48         2.57 o
   6  -4   5         12.05         11.76         5.64 o
 -10  -3   5         32.09         22.17         5.71 o
  -9  -3   5         44.61         45.14         5.27 o
  -8  -3   5         21.61         17.95         2.27 o
  -7  -3   5         47.68         48.16         3.37 o
  -6  -3   5         44.67         45.69         2.59 o
  -5  -3   5         86.01         87.96         4.42 o
  -4  -3   5        145.08        143.05         3.65 o
  -3  -3   5        127.33        121.16         3.61 o
  -2  -3   5        106.54        102.20         2.88 o
  -1  -3   5        130.44        128.65         6.76 o
   0  -3   5        103.77         92.61         3.77 o
   1  -3   5         85.01         87.33         3.77 o
   2  -3   5        466.49        447.89         9.71 o
   3  -3   5        339.68        340.46         8.11 o
   4  -3   5         10.44         11.61         3.68 o
   5  -3   5         24.16         19.78         4.33 o
   6  -3   5        108.87        109.98         9.89 o
 -10  -2   5         32.57         25.38         5.47 o
  -9  -2   5         55.70         52.08         3.76 o
  -8  -2   5         53.56         54.31         3.72 o
  -7  -2   5         85.31         68.29         4.71 o
  -6  -2   5         24.70         23.92         2.15 o
  -5  -2   5         14.36         15.45         1.46 o
  -4  -2   5          7.82          7.44         1.03 o
  -3  -2   5        199.90        205.32         4.12 o
  -2  -2   5         77.22         73.73         2.38 o
  -1  -2   5        285.71        297.73         6.84 o
   0  -2   5        155.93        162.44         4.72 o
   1  -2   5         66.10         63.52         3.04 o
   2  -2   5        125.66        123.23         5.76 o
   3  -2   5         92.02         84.33         3.47 o
   4  -2   5         31.84         34.17         6.10 o
   5  -2   5         13.91         25.13         5.18 o
   6  -2   5         38.14         35.22         5.58 o
 -10  -1   5         76.19         84.86         9.46 o
  -9  -1   5         11.99         10.30         2.06 o
  -8  -1   5          4.87          3.91         1.27 o
  -7  -1   5        141.80        132.66         4.74 o
  -6  -1   5         98.03        103.95         3.81 o
  -5  -1   5         31.14         32.25         1.92 o
  -4  -1   5         21.73         26.50         1.72 o
  -3  -1   5         14.49         13.49         1.18 o
  -2  -1   5         89.37         88.32         2.55 o
  -1  -1   5        280.68        298.77         5.70 o
   0  -1   5        150.71        156.85         4.35 o
   1  -1   5         26.60         32.76         2.55 o
   2  -1   5         21.59         27.07         2.23 o
   3  -1   5        311.71        311.41         6.80 o
   4  -1   5         80.23         79.52         3.58 o
   5  -1   5         86.18         83.81         7.87 o
   6  -1   5         14.74          8.62         3.95 o
 -10   0   5          4.82          5.44         3.38 o
  -9   0   5          9.76          8.88         2.45 o
  -8   0   5          0.23          0.34         0.96 o
  -7   0   5          1.39          0.21         0.98 o
  -6   0   5        166.39        154.89         4.60 o
  -5   0   5        186.74        201.00         4.60 o
  -4   0   5         77.68         77.19         2.39 o
  -3   0   5          4.71          4.08         0.76 o
  -2   0   5         37.88         47.88         2.40 o
  -1   0   5        263.26        292.73         5.06 o
   0   0   5          0.05          3.26         0.88 o
   1   0   5          0.17         -0.51         0.64 o
   2   0   5         42.32         48.70         3.55 o
   3   0   5          5.78          6.62         1.08 o
   4   0   5         19.63         15.57         3.06 o
   5   0   5          2.85          2.66         0.83 o
   6   0   5          7.51          5.37         2.34 o
 -10   1   5         76.24         81.98         9.28 o
  -9   1   5         12.00          9.99         2.18 o
  -8   1   5          4.89          6.12         1.73 o
  -7   1   5        141.75        140.43         4.70 o
  -6   1   5         97.95        100.09         2.33 o
  -5   1   5         31.23         30.36         1.77 o
  -4   1   5         21.75         23.72         1.37 o
  -3   1   5         14.51         17.13         1.27 o
  -2   1   5         89.52         90.85         2.38 o
  -1   1   5        280.58        316.91         5.02 o
   0   1   5        150.52        158.33         3.69 o
   1   1   5         26.66         27.04         1.88 o
   2   1   5         21.63         31.22         2.01 o
   3   1   5        311.71        328.47         6.34 o
   4   1   5         80.10         78.53         3.43 o
   5   1   5         86.22         90.44         3.39 o
   6   1   5         14.75         13.13         2.05 o
 -10   2   5         32.57         30.61         5.95 o
  -9   2   5         55.72         56.93         5.12 o
  -8   2   5         53.62         58.72         4.11 o
  -7   2   5         85.30         78.02         2.90 o
  -6   2   5         24.71         28.25         1.48 o
  -5   2   5         14.36         15.19         1.33 o
  -4   2   5          7.85          6.83         1.61 o
  -3   2   5        199.54        208.80         4.51 o
  -2   2   5         77.33         80.79         2.54 o
  -1   2   5        285.40        312.81         5.42 o
   0   2   5        155.77        170.96         3.86 o
   1   2   5         65.94         59.88         2.64 o
   2   2   5        125.65        124.82         6.73 o
   3   2   5         92.00         92.45         3.41 o
   4   2   5         31.78         27.56         3.83 o
   5   2   5         13.92         13.82         2.01 o
   6   2   5         38.13         46.69         5.89 o
 -10   3   5         32.06         39.91         7.15 o
  -9   3   5         44.55         45.97         7.32 o
  -8   3   5         21.51         20.43         1.28 o
  -7   3   5         47.78         56.85         2.47 o
  -6   3   5         44.75         51.77         2.36 o
  -5   3   5         86.01         90.10         3.18 o
  -4   3   5        145.07        148.91         4.03 o
  -3   3   5        127.38        126.07         4.06 o
  -2   3   5        106.45        109.41         3.58 o
  -1   3   5        130.48        136.27         3.98 o
   0   3   5        103.69         95.03         4.59 o
   1   3   5         84.92         93.89         3.24 o
   2   3   5        466.48        475.31         8.37 o
   3   3   5        339.79        371.37         6.79 o
   4   3   5         10.44          9.09         1.71 o
   5   3   5         24.18         26.11         3.69 o
   6   3   5        108.93        131.11         7.79 o
  -9   4   5         11.11         10.15         2.54 o
  -8   4   5         27.27         29.81         2.45 o
  -7   4   5        167.10        170.29         4.40 o
  -6   4   5         47.67         60.84         3.28 o
  -5   4   5         34.77         39.54         3.05 o
  -4   4   5         69.72         73.74         3.28 o
  -3   4   5         31.92         33.66         2.74 o
  -2   4   5          9.72          8.89         1.78 o
  -1   4   5         23.50         21.36         2.03 o
   0   4   5        159.70        168.90         5.12 o
   1   4   5         10.61         10.13         1.21 o
   2   4   5         19.73         23.88         1.74 o
   3   4   5        126.68        125.85         3.96 o
   4   4   5         72.06         70.58         6.06 o
   5   4   5         25.86         31.86         4.00 o
   6   4   5         12.02         15.33         3.09 o
  -9   5   5          0.94          0.45         2.38 o
  -8   5   5          9.83         11.91         2.67 o
  -7   5   5         81.25         85.65         4.19 o
  -6   5   5         51.44         47.21         3.32 o
  -5   5   5         40.52         38.96         2.78 o
  -4   5   5         29.90         31.24         2.52 o
  -3   5   5        150.44        169.12         5.58 o
  -2   5   5         13.84         10.46         2.17 o
  -1   5   5         23.26         21.63         2.20 o
   0   5   5         38.14         40.70         2.81 o
   1   5   5          5.50          3.05         1.09 o
   2   5   5        204.54        219.81         6.09 o
   3   5   5         12.20         15.38         2.20 o
   4   5   5         21.03         22.15         1.71 o
   5   5   5          3.98          3.12         1.97 o
  -8   6   5         25.93         21.48         4.92 o
  -7   6   5         10.37          8.79         1.96 o
  -6   6   5          2.54          0.28         1.10 o
  -5   6   5          8.60          5.16         1.94 o
  -4   6   5         45.55         42.93         3.11 o
  -3   6   5        101.55         94.88         4.59 o
  -2   6   5         39.33         36.63         3.29 o
  -1   6   5        156.41        171.36         6.13 o
   0   6   5          9.39         14.04         2.27 o
   1   6   5        107.12        108.34         4.84 o
   2   6   5         50.17         50.55         3.12 o
   3   6   5          1.54          0.48         0.99 o
   4   6   5          2.97          1.12         1.49 o
   5   6   5          8.33         12.20         4.86 o
  -8   7   5         28.81         30.76         6.32 o
  -7   7   5          8.70          9.04         2.01 o
  -6   7   5         20.91         19.15         2.34 o
  -5   7   5          6.56          4.66         1.53 o
  -4   7   5         36.84         38.40         3.14 o
  -3   7   5        108.05        111.99         4.98 o
  -2   7   5         39.37         44.68         4.11 o
  -1   7   5         17.27         16.27         4.56 o
   0   7   5         24.09         27.19         3.01 o
   1   7   5         34.37         32.65         3.16 o
   2   7   5         14.97         20.62         2.92 o
   3   7   5         27.15         25.08         2.99 o
   4   7   5          1.42         -0.39         1.65 o
  -7   8   5         13.20         20.41         8.36 o
  -6   8   5          3.77          3.53         1.81 o
  -5   8   5         46.18         45.84         4.39 o
  -4   8   5         83.44         93.47         7.46 o
  -3   8   5         19.83         12.41         3.04 o
  -2   8   5         73.68         81.84         5.86 o
  -1   8   5         37.10         36.63         3.76 o
   0   8   5         12.19         15.30         2.61 o
   1   8   5         10.57         10.44         2.47 o
   2   8   5          8.50          7.23         2.80 o
   3   8   5          8.48          5.81         7.17 o
  -5   9   5         47.78         40.00         7.46 o
  -4   9   5         60.83         75.57         7.88 o
  -3   9   5          1.51          2.41         2.17 o
  -2   9   5         12.29          9.40         4.07 o
  -1   9   5         65.83         76.77         5.63 o
   0   9   5         24.32         25.03         3.79 o
   1   9   5          0.83          0.68         2.19 o
   2   9   5          1.54         -0.33         2.10 o
  -2  10   5          5.28          5.93         5.30 o
  -1  10   5         87.79        116.17        15.94 o
  -4  -9   6          6.63          5.81         3.49 o
  -3  -9   6          0.08          0.08         1.85 o
  -2  -9   6         26.88         28.80         3.45 o
  -1  -9   6         28.57         20.39         3.66 o
   0  -9   6          6.98          8.75         4.47 o
  -6  -8   6          9.84          5.84         2.35 o
  -5  -8   6         19.66         19.65         3.17 o
  -4  -8   6         41.00         36.35         3.06 o
  -3  -8   6         35.00         27.33         3.13 o
  -2  -8   6         31.89         28.01         4.29 o
  -1  -8   6         43.25         34.29         4.40 o
   0  -8   6         62.66         52.78         5.52 o
   1  -8   6         30.66         26.31         4.00 o
   2  -8   6         17.88          8.80         5.49 o
  -7  -7   6         30.37         22.10         3.83 o
  -6  -7   6          1.14          1.15         1.52 o
  -5  -7   6         20.46         12.84         1.91 o
  -4  -7   6         20.84         15.12         1.97 o
  -3  -7   6         11.68         13.21         2.02 o
  -2  -7   6         26.39         18.70         3.17 o
  -1  -7   6         92.90         89.61         8.32 o
   0  -7   6        115.72        101.22         7.15 o
   1  -7   6          3.65          7.37         2.52 o
   2  -7   6         47.99         45.90         5.38 o
   3  -7   6         33.02         27.50         4.92 o
  -8  -6   6          4.30          2.95         2.17 o
  -7  -6   6         26.15         25.35         5.05 o
  -6  -6   6         42.28         39.85         3.14 o
  -5  -6   6        114.83        101.84         4.51 o
  -4  -6   6         62.43         59.22         3.52 o
  -3  -6   6         45.42         40.10         3.18 o
  -2  -6   6         28.12         34.61         5.44 o
  -1  -6   6        226.83        216.11        11.07 o
   0  -6   6         64.15         56.24         5.32 o
   1  -6   6         56.32         42.81         4.60 o
   2  -6   6         10.71         11.82         2.94 o
   3  -6   6          1.39          2.11         2.17 o
   4  -6   6         30.04         44.43         7.51 o
  -9  -5   6          0.26          0.87         4.37 o
  -8  -5   6         28.15         34.92         5.89 o
  -7  -5   6          5.75          4.66         1.33 o
  -6  -5   6          2.76          2.43         1.11 o
  -5  -5   6        205.61        196.34         6.03 o
  -4  -5   6        108.70         98.36         3.55 o
  -3  -5   6         58.47         51.63         3.06 o
  -2  -5   6          4.21          3.50         1.25 o
  -1  -5   6        253.26        243.19         7.50 o
   0  -5   6        338.06        331.50         9.88 o
   1  -5   6         83.43         77.44         6.27 o
   2  -5   6         73.07         72.68         6.28 o
   3  -5   6         10.93         10.37         2.07 o
   4  -5   6         31.03         35.06         3.86 o
  -9  -4   6          7.07          3.17         1.69 o
  -8  -4   6          9.55         10.37         1.90 o
  -7  -4   6         55.75         51.89         3.23 o
  -6  -4   6         78.68         71.18         3.62 o
  -5  -4   6         31.30         27.78         2.12 o
  -4  -4   6        285.28        277.18         5.65 o
  -3  -4   6         13.08         16.31         2.07 o
  -2  -4   6         25.43         22.36         2.51 o
  -1  -4   6          1.75          0.13         0.94 o
   0  -4   6        420.36        424.80        10.03 o
   1  -4   6         79.70         81.21         4.08 o
   2  -4   6         84.56         77.95         4.35 o
   3  -4   6          2.17          0.94         1.84 o
   4  -4   6         35.39         32.73         3.52 o
   5  -4   6          9.11         13.27         5.40 o
 -10  -3   6          1.90          0.29         4.18 o
  -9  -3   6          1.75          1.47         1.37 o
  -8  -3   6         47.72         41.24         3.34 o
  -7  -3   6          9.24          9.61         1.70 o
  -6  -3   6         14.61         19.02         1.81 o
  -5  -3   6         34.12         36.63         2.40 o
  -4  -3   6        225.96        213.72         6.02 o
  -3  -3   6        134.27        136.02         3.52 o
  -2  -3   6        341.88        330.39         6.56 o
  -1  -3   6        194.84        193.11         5.85 o
   0  -3   6        193.70        186.82         7.09 o
   1  -3   6        120.01        117.14         4.49 o
   2  -3   6        195.52        200.02         5.60 o
   3  -3   6          9.07          7.16         1.96 o
   4  -3   6         25.60         27.66         2.95 o
   5  -3   6          0.92          1.30         2.59 o
 -10  -2   6          3.26          2.25         2.85 o
  -9  -2   6         12.26         10.15         1.94 o
  -8  -2   6          7.56          7.09         1.66 o
  -7  -2   6         45.73         46.52         3.37 o
  -6  -2   6         19.33         20.77         1.78 o
  -5  -2   6          8.61          8.19         1.20 o
  -4  -2   6        273.34        269.16         5.24 o
  -3  -2   6          8.86          6.38         1.03 o
  -2  -2   6         33.64         33.24         2.15 o
  -1  -2   6        470.03        471.64        15.53 o
   0  -2   6         50.76         52.66         3.25 o
   1  -2   6         30.27         38.26         2.84 o
   2  -2   6         70.41         69.07         3.53 o
   3  -2   6        109.82        107.44         4.27 o
   4  -2   6          3.50          3.47         1.41 o
   5  -2   6          5.61          7.23         3.20 o
 -10  -1   6         11.57          6.10         3.32 o
  -9  -1   6          8.78          7.40         1.96 o
  -8  -1   6         71.41         73.52         4.84 o
  -7  -1   6         32.76         31.21         3.01 o
  -6  -1   6         39.62         41.99         2.30 o
  -5  -1   6         89.22         90.34         3.30 o
  -4  -1   6        121.13        122.37         3.23 o
  -3  -1   6        259.07        241.86         4.98 o
  -2  -1   6        197.41        194.52         4.64 o
  -1  -1   6        517.90        539.34        10.28 o
   0  -1   6        140.75        140.57         4.36 o
   1  -1   6        143.33        142.48         4.62 o
   2  -1   6          5.63          7.68         1.86 o
   3  -1   6        488.04        477.85         9.69 o
   4  -1   6        127.88        135.02         5.25 o
   5  -1   6          4.39         12.56         3.53 o
 -10   0   6         38.80         42.40         8.23 o
  -9   0   6         20.81         15.14         2.50 o
  -8   0   6          0.02         -0.34         1.02 o
  -7   0   6        125.97        124.94         4.59 o
  -6   0   6         19.49         19.64         1.97 o
  -5   0   6          5.44          3.19         1.29 o
  -4   0   6        105.89         99.43         2.86 o
  -3   0   6        158.47        162.64         3.90 o
  -2   0   6        104.03        116.12         3.15 o
  -1   0   6         79.68         84.18         2.81 o
   0   0   6          0.51          1.17         0.71 o
   1   0   6         11.31          9.90         1.26 o
   2   0   6        481.91        471.71        10.28 o
   3   0   6          0.82         -0.11         0.83 o
   4   0   6          0.01         -0.06         0.94 o
   5   0   6          9.15          9.35         2.13 o
   6   0   6         21.76         27.21         5.68 o
 -10   1   6         11.58         14.70         3.11 o
  -9   1   6          8.79         11.78         2.21 o
  -8   1   6         71.42         69.38         4.61 o
  -7   1   6         32.76         25.85         2.59 o
  -6   1   6         39.62         44.38         2.19 o
  -5   1   6         89.10         91.49         2.93 o
  -4   1   6        121.18        124.37         3.47 o
  -3   1   6        259.34        254.34         5.35 o
  -2   1   6        197.69        198.93         3.98 o
  -1   1   6        517.95        520.96         8.02 o
   0   1   6        140.77        149.11         3.81 o
   1   1   6        143.31        153.49         3.96 o
   2   1   6          5.61          5.90         1.13 o
   3   1   6        488.01        474.74         9.87 o
   4   1   6        127.80        122.95         4.85 o
   5   1   6          4.41          6.06         2.03 o
 -10   2   6          3.25          0.07         1.82 o
  -9   2   6         12.26         13.33         2.39 o
  -8   2   6          7.57          7.67         1.77 o
  -7   2   6         45.66         44.13         1.96 o
  -6   2   6         19.38         19.10         1.45 o
  -5   2   6          8.57          8.88         1.25 o
  -4   2   6        273.83        274.72         5.69 o
  -3   2   6          8.92          9.71         1.56 o
  -2   2   6         33.65         34.28         1.89 o
  -1   2   6        470.16        487.54         7.20 o
   0   2   6         50.73         47.87         2.69 o
   1   2   6         30.25         36.52         4.61 o
   2   2   6         70.38         71.82         3.54 o
   3   2   6        109.89        115.84         4.54 o
   4   2   6          3.50          4.06         1.22 o
   5   2   6          5.62          4.59         1.68 o
 -10   3   6          1.92          0.34         3.16 o
  -9   3   6          1.72          4.14         2.10 o
  -8   3   6         47.69         46.51         2.36 o
  -7   3   6          9.25          9.91         1.28 o
  -6   3   6         14.60         19.10         1.72 o
  -5   3   6         34.21         34.86         2.39 o
  -4   3   6        226.00        222.92         8.02 o
  -3   3   6        134.37        140.31         3.88 o
  -2   3   6        341.95        339.16         6.26 o
  -1   3   6        194.75        199.36         4.59 o
   0   3   6        193.75        204.13         5.19 o
   1   3   6        120.22        119.12         3.20 o
   2   3   6        195.35        198.24         5.25 o
   3   3   6          9.05          8.87         0.96 o
   4   3   6         25.54         24.24         5.66 o
   5   3   6          0.91          1.98         1.93 o
  -9   4   6          7.06          4.42         1.99 o
  -8   4   6          9.54         12.06         2.14 o
  -7   4   6         55.77         59.27         3.23 o
  -6   4   6         78.70         83.35         3.91 o
  -5   4   6         31.30         30.66         2.36 o
  -4   4   6        285.36        278.26         6.80 o
  -3   4   6         13.09         13.96         1.80 o
  -2   4   6         25.46         26.00         2.33 o
  -1   4   6          1.76          1.42         0.93 o
   0   4   6        419.94        432.08         9.41 o
   1   4   6         79.65         87.21         2.65 o
   2   4   6         84.54         90.13         4.04 o
   3   4   6          2.20          0.98         0.83 o
   4   4   6         35.36         34.30        11.50 o
   5   4   6          9.07          5.10         2.29 o
  -9   5   6          0.25          0.83         3.35 o
  -8   5   6         28.22         31.28         3.95 o
  -7   5   6          5.75          6.83         1.52 o
  -6   5   6          2.76          2.99         1.27 o
  -5   5   6        205.58        229.20         6.47 o
  -4   5   6        108.70        111.33         4.83 o
  -3   5   6         58.55         57.01         4.46 o
  -2   5   6          4.22          3.03         1.17 o
  -1   5   6        253.20        272.52         7.45 o
   0   5   6        337.96        354.51        11.89 o
   1   5   6         83.30         82.46         5.23 o
   2   5   6         73.05         76.71         3.05 o
   3   5   6         10.96          9.58         1.70 o
   4   5   6         31.01         40.68         7.63 o
  -8   6   6          4.31          8.15         6.78 o
  -7   6   6         26.11         33.23         3.01 o
  -6   6   6         42.21         40.13         3.26 o
  -5   6   6        114.84        129.39         5.48 o
  -4   6   6         62.45         61.89         4.15 o
  -3   6   6         45.40         42.59         3.32 o
  -2   6   6         28.09         27.72         3.64 o
  -1   6   6        227.13        254.05        10.48 o
   0   6   6         64.19         63.25         4.89 o
   1   6   6         56.30         53.07         4.48 o
   2   6   6         10.69         10.01         2.60 o
   3   6   6          1.40          0.63         1.22 o
  -7   7   6         30.37         28.61         3.42 o
  -6   7   6          1.15          2.39         1.53 o
  -5   7   6         20.48         24.33         2.94 o
  -4   7   6         20.83         20.47         3.54 o
  -3   7   6         11.68         13.29         3.45 o
  -2   7   6         26.41         19.19         2.87 o
  -1   7   6         92.93        107.36         7.15 o
   0   7   6        115.70        124.10        13.10 o
   1   7   6          3.67          2.58         1.73 o
   2   7   6         48.00         60.38         4.75 o
   3   7   6         33.05         36.90         7.63 o
  -6   8   6          9.83          8.63         2.89 o
  -5   8   6         19.68         17.99         3.76 o
  -4   8   6         40.98         42.28         6.96 o
  -3   8   6         35.01         35.87         6.71 o
  -2   8   6         31.89         33.84         4.61 o
  -1   8   6         43.29         40.91         4.59 o
   0   8   6         62.64         70.99         5.84 o
   1   8   6         30.68         22.73         3.97 o
   2   8   6         17.93         21.37         4.42 o
  -4   9   6          6.63          4.33         2.68 o
  -3   9   6          0.09          1.34         2.21 o
  -2   9   6         26.83         32.30         5.83 o
  -1   9   6         28.56         35.84         8.26 o
   0   9   6          6.95          4.00         2.78 o
  -5  -8   7         16.97         19.15         5.47 o
  -4  -8   7         17.71         13.33         2.46 o
  -3  -8   7         97.71         80.24        11.59 o
  -2  -8   7         57.24         55.31         5.54 o
  -1  -8   7         18.36         17.12         3.35 o
   0  -8   7         12.69          9.13         4.51 o
  -7  -7   7         48.21         66.40        10.55 o
  -6  -7   7         18.62         11.70         2.49 o
  -5  -7   7         37.86         40.89         3.99 o
  -4  -7   7         14.76         12.77         2.22 o
  -3  -7   7         20.28         11.15         2.69 o
  -2  -7   7         77.27         76.24         6.11 o
  -1  -7   7         30.15         28.48         4.05 o
   0  -7   7         23.07         23.76         3.64 o
   1  -7   7          9.55          8.61         2.83 o
   2  -7   7          7.69          2.31         3.21 o
  -8  -6   7         13.52          8.26         3.40 o
  -7  -6   7         38.62         36.92         3.89 o
  -6  -6   7         17.22         18.62         2.79 o
  -5  -6   7         78.38         81.88         4.19 o
  -4  -6   7         20.61         18.67         2.47 o
  -3  -6   7          4.51          5.39         1.96 o
  -2  -6   7         23.15         19.25         7.70 o
  -1  -6   7         45.11         42.83         5.71 o
   0  -6   7         28.32         25.04         3.69 o
   1  -6   7          5.09          3.23         2.03 o
   2  -6   7          9.18          5.03         2.50 o
   3  -6   7          8.14          7.93         3.29 o
  -8  -5   7         17.77         12.59         3.16 o
  -7  -5   7         25.13         18.02         2.29 o
  -6  -5   7         17.38         15.53         2.84 o
  -5  -5   7        266.61        239.37         6.47 o
  -4  -5   7        106.61        111.81         4.35 o
  -3  -5   7        165.68        165.32         5.02 o
  -2  -5   7          5.98          7.46         2.94 o
  -1  -5   7         50.20         47.37         6.08 o
   0  -5   7        199.28        176.66         7.75 o
   1  -5   7          5.27          1.99         1.86 o
   2  -5   7         10.82          8.89         2.48 o
   3  -5   7          4.04          4.27         2.21 o
  -9  -4   7          1.90          2.08         1.96 o
  -8  -4   7         17.23         13.49         2.42 o
  -7  -4   7          1.93          2.23         1.22 o
  -6  -4   7         52.95         46.91         3.04 o
  -5  -4   7        137.30        133.17         4.22 o
  -4  -4   7         42.34         41.27         2.49 o
  -3  -4   7        119.69        117.00         3.61 o
  -2  -4   7        165.96        162.31         7.63 o
  -1  -4   7        146.04        136.02         5.50 o
   0  -4   7         47.38         50.65         3.88 o
   1  -4   7         40.25         36.44         3.30 o
   2  -4   7        111.33        115.97         5.76 o
   3  -4   7         10.82          7.19         1.83 o
   4  -4   7         13.78         19.35         6.61 o
  -9  -3   7         52.69         55.38         4.12 o
  -8  -3   7         34.18         28.92         2.90 o
  -7  -3   7         71.34         65.87         3.53 o
  -6  -3   7         17.02         14.36         1.75 o
  -5  -3   7        175.66        169.05         4.41 o
  -4  -3   7        641.88        624.57        10.25 o
  -3  -3   7        295.43        292.02         6.86 o
  -2  -3   7         92.51         98.33         4.59 o
  -1  -3   7        170.48        179.07         9.02 o
   0  -3   7        288.95        274.49         9.25 o
   1  -3   7         67.40         66.59         4.23 o
   2  -3   7         44.61         41.19         3.34 o
   3  -3   7         26.43         25.60         3.10 o
   4  -3   7         22.75         25.51         3.16 o
 -10  -2   7         20.80         17.73         6.01 o
  -9  -2   7         39.21         36.02         3.77 o
  -8  -2   7         28.53         25.41         3.40 o
  -7  -2   7        124.72        123.36         6.86 o
  -6  -2   7         10.19          7.54         1.40 o
  -5  -2   7         12.64         12.19         1.43 o
  -4  -2   7        300.64        299.03         5.78 o
  -3  -2   7         44.13         40.60         2.40 o
  -2  -2   7         65.76         67.72         3.13 o
  -1  -2   7        138.25        143.59         4.93 o
   0  -2   7         13.49         16.50         2.06 o
   1  -2   7        261.71        257.76         6.96 o
   2  -2   7          5.44          5.03         1.34 o
   3  -2   7          9.39          6.29         1.47 o
   4  -2   7          0.94          0.58         1.16 o
 -10  -1   7          3.12          1.19         1.82 o
  -9  -1   7          2.22          3.60         1.70 o
  -8  -1   7        113.35         98.80         5.35 o
  -7  -1   7        103.69        103.03         3.60 o
  -6  -1   7         58.48         57.92         2.81 o
  -5  -1   7         71.76         73.88         5.23 o
  -4  -1   7        312.58        316.15         6.32 o
  -3  -1   7         22.67         21.36         1.77 o
  -2  -1   7         98.45         97.74         3.36 o
  -1  -1   7        143.26        143.56         4.67 o
   0  -1   7         72.01         78.28         3.64 o
   1  -1   7          1.43          0.86         0.89 o
   2  -1   7         34.14         30.10         4.01 o
   3  -1   7          2.43          4.43         1.59 o
   4  -1   7         16.13         14.18         2.23 o
   5  -1   7          1.19          2.61         2.59 o
 -10   0   7          4.88          3.79         2.28 o
  -9   0   7         30.23         37.73         3.77 o
  -8   0   7          8.32          6.46         1.85 o
  -7   0   7        137.39        148.90         5.70 o
  -6   0   7          3.05          1.21         0.75 o
  -5   0   7         99.36        104.61         3.31 o
  -4   0   7          3.95          3.93         1.34 o
  -3   0   7          9.49          5.36         1.05 o
  -2   0   7         86.74         84.17         2.92 o
  -1   0   7         12.25         10.07         1.50 o
   0   0   7          3.18          9.44         2.03 o
   1   0   7         11.01         12.20         1.60 o
   2   0   7        263.27        240.28         6.19 o
   3   0   7         17.35         13.46         3.55 o
   4   0   7          0.06         -0.82         0.97 o
   5   0   7         13.43         11.31         3.25 o
 -10   1   7          3.14          1.33         2.00 o
  -9   1   7          2.22         -0.31         1.31 o
  -8   1   7        113.21        117.36         6.00 o
  -7   1   7        103.63        105.94         3.63 o
  -6   1   7         58.61         58.67         4.83 o
  -5   1   7         71.71         70.28         3.14 o
  -4   1   7        312.48        323.63         7.31 o
  -3   1   7         22.74         23.56         2.49 o
  -2   1   7         98.54        103.67         2.98 o
  -1   1   7        143.44        148.16         4.03 o
   0   1   7         72.04         81.34         5.61 o
   1   1   7          1.43          1.07         0.79 o
   2   1   7         34.16         30.05         2.69 o
   3   1   7          2.43          3.55         1.10 o
   4   1   7         16.13         18.95         3.79 o
   5   1   7          1.17          0.13         2.21 o
 -10   2   7         20.70         19.67         4.13 o
  -9   2   7         39.14         39.20         3.76 o
  -8   2   7         28.56         27.61         2.85 o
  -7   2   7        124.53        127.43         5.78 o
  -6   2   7         10.16          9.64         1.20 o
  -5   2   7         12.59         14.31         1.86 o
  -4   2   7        300.70        306.98         5.72 o
  -3   2   7         44.13         41.34         2.26 o
  -2   2   7         65.80         69.79         2.64 o
  -1   2   7        138.33        144.31         6.11 o
   0   2   7         13.53         14.73         1.52 o
   1   2   7        261.85        254.06         6.16 o
   2   2   7          5.42          6.53         1.42 o
   3   2   7          9.37          7.92         1.48 o
   4   2   7          0.93          1.45         2.35 o
  -9   3   7         52.63         54.22         5.56 o
  -8   3   7         34.10         34.21         3.39 o
  -7   3   7         71.30         60.17         2.90 o
  -6   3   7         17.00         17.41         1.97 o
  -5   3   7        175.64        190.25         5.01 o
  -4   3   7        642.19        660.24        10.75 o
  -3   3   7        295.31        305.28         6.45 o
  -2   3   7         92.54         91.07         3.76 o
  -1   3   7        170.37        186.76         4.36 o
   0   3   7        289.06        302.01         7.31 o
   1   3   7         67.47         70.02         3.02 o
   2   3   7         44.59         35.19         2.98 o
   3   3   7         26.37         26.48         5.77 o
   4   3   7         22.73         24.04         6.46 o
  -9   4   7          1.90         -0.69         1.56 o
  -8   4   7         17.26         15.64         2.95 o
  -7   4   7          1.92          2.52         1.14 o
  -6   4   7         52.99         55.08         3.47 o
  -5   4   7        137.41        148.03         5.38 o
  -4   4   7         42.28         42.94         3.26 o
  -3   4   7        119.74        128.75         5.35 o
  -2   4   7        166.05        172.29         5.21 o
  -1   4   7        146.26        150.03         6.03 o
   0   4   7         47.36         53.94        10.09 o
   1   4   7         40.33         40.47         1.87 o
   2   4   7        111.40        119.98         4.27 o
   3   4   7         10.85         10.50         1.77 o
   4   4   7         13.75         16.23         5.35 o
  -8   5   7         17.79         19.72         3.34 o
  -7   5   7         25.13         24.80         3.03 o
  -6   5   7         17.27         17.90         2.78 o
  -5   5   7        266.51        275.60         8.01 o
  -4   5   7        106.69        110.86         5.27 o
  -3   5   7        165.66        173.32         6.37 o
  -2   5   7          5.95          3.98         1.56 o
  -1   5   7         50.13         52.64         7.85 o
   0   5   7        199.35        211.97        13.54 o
   1   5   7          5.30          6.14         1.85 o
   2   5   7         10.86         11.39         2.43 o
   3   5   7          4.03          2.99         1.38 o
  -8   6   7         13.53          4.13         4.03 o
  -7   6   7         38.58         31.04         3.89 o
  -6   6   7         17.28         13.97         2.50 o
  -5   6   7         78.27         78.16         5.34 o
  -4   6   7         20.69         17.40         3.10 o
  -3   6   7          4.50          4.84         2.62 o
  -2   6   7         23.17         21.18         4.13 o
  -1   6   7         45.06         53.30         5.88 o
   0   6   7         28.35         32.80         3.75 o
   1   6   7          5.09          3.19         2.31 o
   2   6   7          9.17         14.99         2.95 o
   3   6   7          8.08          6.61         2.19 o
  -7   7   7         48.25         60.86         9.96 o
  -6   7   7         18.55         15.23         3.13 o
  -5   7   7         37.82         37.22         6.04 o
  -4   7   7         14.69         17.93         4.25 o
  -3   7   7         20.26         16.47         7.02 o
  -2   7   7         77.32         83.44         6.82 o
  -1   7   7         30.15         22.40         6.03 o
   0   7   7         23.02         26.29         4.39 o
   1   7   7          9.56          7.62         3.67 o
   2   7   7          7.71          8.12         4.23 o
  -5   8   7         16.94         19.46         4.01 o
  -4   8   7         17.74         18.43         3.83 o
  -3   8   7         97.63        115.39        10.41 o
  -2   8   7         57.32         72.36         7.85 o
  -1   8   7         18.36         16.67         4.74 o
   0   8   7         12.66         14.77         3.84 o
  -4  -8   8         20.92         19.82         3.08 o
  -3  -8   8         24.45         16.15         4.07 o
  -2  -8   8          2.34         -2.26         2.26 o
  -6  -7   8         45.71         46.61         5.33 o
  -5  -7   8         15.99         18.07         3.55 o
  -4  -7   8         10.96         10.57         2.22 o
  -3  -7   8          2.26         -0.64         2.11 o
  -2  -7   8         53.36         48.30         5.34 o
  -1  -7   8        117.95        138.68         8.35 o
   0  -7   8         34.46         29.91         6.18 o
  -7  -6   8         30.20         33.38         3.83 o
  -6  -6   8         11.04          9.39         1.96 o
  -5  -6   8         11.15          6.79         1.62 o
  -4  -6   8          6.62          6.06         1.97 o
  -3  -6   8         33.64         26.35         4.86 o
  -2  -6   8         85.07         79.09         8.07 o
  -1  -6   8         14.30         11.29         3.44 o
   0  -6   8         36.93         32.33         4.42 o
   1  -6   8         23.84         28.65         4.15 o
  -8  -5   8         14.64         16.16         3.51 o
  -7  -5   8        259.15        269.10         7.52 o
  -6  -5   8         18.52         18.33         2.29 o
  -5  -5   8         98.84         93.08         4.28 o
  -4  -5   8         10.26         11.97         1.66 o
  -3  -5   8         77.27         67.55         6.84 o
  -2  -5   8         12.10         14.33         6.49 o
  -1  -5   8         78.04         59.40         6.62 o
   0  -5   8         84.47         59.45         6.65 o
   1  -5   8          0.21         -0.56         1.61 o
   2  -5   8         19.45         18.13         4.24 o
  -9  -4   8         11.88          9.38         4.86 o
  -8  -4   8         63.23         65.54         4.91 o
  -7  -4   8          8.75         10.50         1.91 o
  -6  -4   8         36.98         39.31         3.18 o
  -5  -4   8         35.51         30.98         2.66 o
  -4  -4   8          3.38          9.54         2.08 o
  -3  -4   8         25.68         23.18         2.35 o
  -2  -4   8         80.29         64.76         6.41 o
  -1  -4   8         35.60         28.59         5.54 o
   0  -4   8          4.12          2.90         2.15 o
   1  -4   8         11.73         18.20         3.61 o
   2  -4   8         17.70         16.88         3.13 o
   3  -4   8         24.87         15.36         4.62 o
  -9  -3   8         20.69         21.79         3.69 o
  -8  -3   8         42.84         29.86         3.65 o
  -7  -3   8        188.69        199.62         6.05 o
  -6  -3   8         76.59         78.13         5.14 o
  -5  -3   8         65.75         66.47         5.07 o
  -4  -3   8         25.02         27.02         2.30 o
  -3  -3   8          7.36          9.43         1.54 o
  -2  -3   8         15.54         12.41         2.44 o
  -1  -3   8          4.27          6.30         1.91 o
   0  -3   8         23.01         24.28         4.27 o
   1  -3   8         29.99         26.97         4.81 o
   2  -3   8          1.30          0.18         1.51 o
   3  -3   8          7.65         11.30         2.58 o
  -9  -2   8         31.15         34.70         4.36 o
  -8  -2   8         24.65         24.26         3.55 o
  -7  -2   8         61.25         65.94         3.91 o
  -6  -2   8         15.86         11.98         1.70 o
  -5  -2   8          6.02          4.46         1.11 o
  -4  -2   8        103.10        102.02         3.60 o
  -3  -2   8        115.51        108.92         5.45 o
  -2  -2   8         17.27         16.58         2.21 o
  -1  -2   8          0.48          0.53         0.98 o
   0  -2   8         12.60         11.41         2.19 o
   1  -2   8         49.67         41.40         3.99 o
   2  -2   8          4.94          4.83         2.16 o
   3  -2   8         52.62         51.27         4.68 o
  -9  -1   8         10.90          7.43         2.09 o
  -8  -1   8         76.38         75.31         5.20 o
  -7  -1   8         30.80         31.52         4.21 o
  -6  -1   8         58.37         57.69         3.06 o
  -5  -1   8        208.21        203.61         4.86 o
  -4  -1   8         44.42         42.75         2.69 o
  -3  -1   8         49.37         51.41         2.87 o
  -2  -1   8          0.95          0.60         0.82 o
  -1  -1   8         60.17         65.46         3.93 o
   0  -1   8         15.53         17.42         2.10 o
   1  -1   8         15.83         11.07         1.87 o
   2  -1   8         55.81         55.12         4.52 o
   3  -1   8         11.26          8.10         2.15 o
  -9   0   8          0.18          0.16         1.95 o
  -8   0   8         43.72         48.56         4.18 o
  -7   0   8          2.35          1.88         0.96 o
  -6   0   8         43.83         49.73         3.64 o
  -5   0   8          6.15          6.69         1.29 o
  -4   0   8        309.24        308.44         6.47 o
  -3   0   8        130.67        139.75         4.02 o
  -2   0   8          1.95          2.85         1.21 o
  -1   0   8         10.24         10.95         1.71 o
   0   0   8         11.60          6.93         1.36 o
   1   0   8         12.81         19.68         2.85 o
   2   0   8         10.81         12.64         2.39 o
   3   0   8          0.95          1.42         1.42 o
   4   0   8          0.32          0.76         2.52 o
  -9   1   8         10.90         10.76         3.19 o
  -8   1   8         76.43         73.74         5.09 o
  -7   1   8         30.76         28.93         2.26 o
  -6   1   8         58.40         59.65         3.32 o
  -5   1   8        208.30        213.72         8.18 o
  -4   1   8         44.36         48.00         2.54 o
  -3   1   8         49.37         46.76         2.95 o
  -2   1   8          0.95          1.49         0.75 o
  -1   1   8         60.19         61.68         3.18 o
   0   1   8         15.47         16.28         2.22 o
   1   1   8         15.87         15.45         2.14 o
   2   1   8         55.71         53.70         4.24 o
   3   1   8         11.25          7.85         4.11 o
   4   1   8          6.50          9.33         3.92 o
  -9   2   8         31.16         24.78         3.09 o
  -8   2   8         24.70         23.60         3.94 o
  -7   2   8         61.31         61.48         3.35 o
  -6   2   8         15.83         14.28         1.56 o
  -5   2   8          6.01          5.35         1.18 o
  -4   2   8        103.23        111.02         5.21 o
  -3   2   8        115.60        116.48         3.40 o
  -2   2   8         17.26         16.20         1.53 o
  -1   2   8          0.48         -0.12         0.80 o
   0   2   8         12.64         12.59         1.90 o
   1   2   8         49.69         50.49         3.63 o
   2   2   8          4.95          4.23         1.34 o
   3   2   8         52.71         63.49         3.58 o
  -9   3   8         20.68         19.20         2.96 o
  -8   3   8         42.83         41.47         4.56 o
  -7   3   8        188.54        209.90         4.79 o
  -6   3   8         76.64         79.62         3.33 o
  -5   3   8         65.67         67.15         3.27 o
  -4   3   8         25.08         27.14         3.61 o
  -3   3   8          7.37          6.98         1.37 o
  -2   3   8         15.48         13.06         1.65 o
  -1   3   8          4.27          3.73         1.57 o
   0   3   8         23.01         24.45         2.32 o
   1   3   8         30.02         31.97         2.49 o
   2   3   8          1.31         -0.95         0.95 o
   3   3   8          7.65         11.25         1.90 o
  -9   4   8         11.85         12.44         4.91 o
  -8   4   8         63.12         65.14         5.96 o
  -7   4   8          8.75          9.55         2.03 o
  -6   4   8         36.91         36.61         5.43 o
  -5   4   8         35.57         41.08         3.96 o
  -4   4   8          3.36         11.04         2.23 o
  -3   4   8         25.73         26.06         5.29 o
  -2   4   8         80.32         75.25         6.85 o
  -1   4   8         35.67         23.87         4.71 o
   0   4   8          4.10          6.14         4.81 o
   1   4   8         11.71         12.87         4.59 o
   2   4   8         17.70         15.33         2.46 o
  -8   5   8         14.65         16.00         4.20 o
  -7   5   8        258.96        293.97        11.59 o
  -6   5   8         18.50         19.14         2.66 o
  -5   5   8         98.85        109.30         6.39 o
  -4   5   8         10.24          9.16         3.34 o
  -3   5   8         77.20         61.77         6.67 o
  -2   5   8         12.13          7.14         4.13 o
  -1   5   8         78.06         69.51         8.36 o
   0   5   8         84.40         90.56         7.49 o
   1   5   8          0.21         -0.34         1.49 o
   2   5   8         19.42         27.12        10.18 o
  -7   6   8         30.20         21.13         4.81 o
  -6   6   8         11.06         10.84         2.74 o
  -5   6   8         11.18          9.42         3.94 o
  -4   6   8          6.62          4.34         4.62 o
  -3   6   8         33.56         42.93         6.10 o
  -2   6   8         85.16        102.19         8.66 o
  -1   6   8         14.29         14.87         4.33 o
   0   6   8         36.93         45.64         6.56 o
   1   6   8         23.88         21.38         4.89 o
  -6   7   8         45.65         52.50         9.14 o
  -5   7   8         16.00         23.81         5.04 o
  -4   7   8         10.93          7.86         3.38 o
  -3   7   8          2.28          1.55         4.59 o
  -2   7   8         53.31         70.04         9.67 o
  -1   7   8        117.89        148.83         9.48 o
   0   7   8         34.40         44.02         5.53 o
  -3   8   8         24.48         18.32         7.00 o
  -2   8   8          2.34          4.76         4.81 o
  -4  -7   9          8.41          2.91         2.70 o
  -3  -7   9          5.63          3.94         4.13 o
  -2  -7   9         36.53         43.41        10.40 o
  -6  -6   9          3.19          3.30         2.12 o
  -5  -6   9          5.84          4.21         1.76 o
  -4  -6   9          6.25          9.05         4.11 o
  -3  -6   9          8.80         11.03         3.52 o
  -2  -6   9         42.81         41.98         6.26 o
  -1  -6   9         58.17         43.44         6.02 o
   0  -6   9         44.10         38.74         8.51 o
  -7  -5   9         20.19         16.83         2.44 o
  -6  -5   9          3.60          4.05         1.45 o
  -5  -5   9          7.77          4.47         1.67 o
  -4  -5   9          1.32          0.29         2.12 o
  -3  -5   9         16.08         14.40         3.59 o
  -2  -5   9         58.83         55.79         9.94 o
  -1  -5   9         51.74         44.84         8.26 o
   0  -5   9          6.14          4.43         2.82 o
   1  -5   9          8.43          6.19         3.21 o
  -8  -4   9         25.05         19.44         4.14 o
  -7  -4   9         94.28        102.03         5.40 o
  -6  -4   9         61.64         73.01         4.33 o
  -5  -4   9         50.52         51.41         3.54 o
  -4  -4   9         22.32         23.83         3.37 o
  -3  -4   9         13.14          4.90         2.44 o
  -2  -4   9          7.29          4.11         2.24 o
  -1  -4   9         15.64         10.72         3.07 o
   0  -4   9          2.66         -0.45         3.96 o
   1  -4   9          0.62          3.42         4.76 o
  -8  -3   9        120.45        130.44         7.65 o
  -7  -3   9         38.71         41.21         3.79 o
  -6  -3   9         63.89         57.09         5.02 o
  -5  -3   9          0.37         -0.34         1.14 o
  -4  -3   9         94.92         98.28         6.95 o
  -3  -3   9         21.85         25.08         2.87 o
  -2  -3   9         25.72         17.63         3.49 o
  -1  -3   9         21.36         20.05         4.25 o
   0  -3   9          0.31          0.11         3.31 o
   1  -3   9          1.46          0.33         1.90 o
   2  -3   9         62.32         56.04         7.83 o
  -9  -2   9         46.36         52.42         8.58 o
  -8  -2   9          4.38          3.87         2.31 o
  -7  -2   9         57.41         57.76         4.57 o
  -6  -2   9         11.79          8.94         1.93 o
  -5  -2   9        128.28        130.34         5.45 o
  -4  -2   9         15.44         14.26         2.43 o
  -3  -2   9         37.12         34.71         3.80 o
  -2  -2   9         17.72         17.99         3.18 o
  -1  -2   9         34.89         32.39         3.89 o
   0  -2   9         41.71         36.71         3.95 o
   1  -2   9          5.50          4.53         2.33 o
   2  -2   9         19.44         14.61         3.30 o
  -9  -1   9          6.45          1.43         2.00 o
  -8  -1   9         37.04         41.86         4.76 o
  -7  -1   9         20.35         20.98         3.62 o
  -6  -1   9         88.44         90.12         4.55 o
  -5  -1   9        302.39        322.83         8.59 o
  -4  -1   9        116.24        124.32         5.68 o
  -3  -1   9        101.45         99.62         5.94 o
  -2  -1   9         39.56         31.02         3.92 o
  -1  -1   9          5.13          1.68         1.51 o
   0  -1   9          0.67         -0.93         1.09 o
   1  -1   9          0.85          1.34         1.53 o
   2  -1   9         12.83          9.64         2.61 o
  -9   0   9         12.01         12.31         2.93 o
  -8   0   9          1.82          0.57         1.79 o
  -7   0   9         14.21         15.84         2.26 o
  -6   0   9         78.72         87.35         5.29 o
  -5   0   9         20.73         20.09         2.48 o
  -4   0   9        216.83        218.16         6.69 o
  -3   0   9          7.75          3.02         1.70 o
  -2   0   9         10.09          7.28         1.81 o
  -1   0   9         55.04         55.94         4.32 o
   0   0   9          3.91          5.28         1.69 o
   1   0   9         21.77         22.39         2.93 o
   2   0   9          0.14          0.03         1.29 o
  -9   1   9          6.45          2.84         2.38 o
  -8   1   9         37.10         35.79         4.30 o
  -7   1   9         20.38         19.30         2.48 o
  -6   1   9         88.40         96.79         4.66 o
  -5   1   9        302.37        311.35        13.82 o
  -4   1   9        116.08        112.55         4.88 o
  -3   1   9        101.31         94.04         3.97 o
  -2   1   9         39.51         36.68         3.41 o
  -1   1   9          5.16          3.78         1.47 o
   0   1   9          0.67          1.40         1.21 o
   1   1   9          0.84         -0.27         1.19 o
   2   1   9         12.86         12.68         3.35 o
  -9   2   9         46.32         44.19         4.92 o
  -8   2   9          4.37          2.33         2.56 o
  -7   2   9         57.36         61.52         5.21 o
  -6   2   9         11.83          9.98         1.76 o
  -5   2   9        128.37        136.63         5.09 o
  -4   2   9         15.45         14.17         1.83 o
  -3   2   9         37.03         38.01         2.81 o
  -2   2   9         17.65         18.35         2.45 o
  -1   2   9         34.91         30.18         3.07 o
   0   2   9         41.68         39.64         3.75 o
   1   2   9          5.52          4.69         1.87 o
   2   2   9         19.41         17.89         2.89 o
  -8   3   9        120.45        149.17        10.12 o
  -7   3   9         38.65         35.32         4.10 o
  -6   3   9         63.91         71.27         3.75 o
  -5   3   9          0.36          0.82         1.05 o
  -4   3   9         94.72         95.99         4.44 o
  -3   3   9         21.77         24.29         2.66 o
  -2   3   9         25.70         23.49         3.52 o
  -1   3   9         21.38         22.62         3.49 o
   0   3   9          0.31          2.55         1.62 o
   1   3   9          1.44          0.48         1.48 o
   2   3   9         62.30         74.71         5.64 o
  -8   4   9         25.00         25.67         5.02 o
  -7   4   9         94.45        109.04         9.64 o
  -6   4   9         61.74         70.38         9.21 o
  -5   4   9         50.53         54.00         4.08 o
  -4   4   9         22.34         22.92         3.22 o
  -3   4   9         13.16         10.53         2.35 o
  -2   4   9          7.29          4.23         2.17 o
  -1   4   9         15.65         15.86         3.65 o
   0   4   9          2.65          1.95         1.57 o
   1   4   9          0.62          0.29         1.51 o
  -7   5   9         20.13         15.86         4.02 o
  -6   5   9          3.63          3.29         1.75 o
  -5   5   9          7.79         11.45         2.63 o
  -4   5   9          1.32          3.49         2.43 o
  -3   5   9         16.08         13.45         5.98 o
  -2   5   9         58.84         77.14         9.04 o
  -1   5   9         51.73         47.73         5.23 o
   0   5   9          6.15          4.98         2.38 o
   1   5   9          8.42          9.33         3.06 o
  -6   6   9          3.19          6.43         3.26 o
  -5   6   9          5.84          5.33         2.98 o
  -4   6   9          6.24          4.18         2.75 o
  -3   6   9          8.80          8.38         3.27 o
  -2   6   9         42.78         48.17         7.49 o
  -1   6   9         58.26         61.05         8.17 o
   0   6   9         44.17         43.46         6.76 o
  -6  -5  10         26.90         34.66        14.17 o
  -5  -5  10          8.96          7.39         4.33 o
  -4  -5  10          7.05         11.50         3.51 o
  -3  -5  10         19.67         18.54         5.81 o
  -2  -5  10         13.10         17.01         4.32 o
  -7  -4  10          1.58          4.87         2.25 o
  -6  -4  10          3.47          2.27         1.84 o
  -5  -4  10         19.62         18.95         4.08 o
  -4  -4  10         41.15         35.76         5.20 o
  -3  -4  10          3.65          3.62         2.66 o
  -2  -4  10         10.31          8.92         2.97 o
  -1  -4  10         61.12         69.70         7.35 o
   0  -4  10         43.61         56.92         8.80 o
  -8  -3  10         38.86         32.81         5.42 o
  -7  -3  10         29.93         28.32         3.20 o
  -6  -3  10         19.08         18.61         3.51 o
  -5  -3  10         14.20         16.39         4.77 o
  -4  -3  10          6.13         11.39         2.58 o
  -3  -3  10         47.54         52.64         9.45 o
  -2  -3  10          1.17          2.49         2.16 o
  -1  -3  10         27.29         18.20         4.74 o
   0  -3  10         21.19         17.86         3.85 o
  -8  -2  10         16.62         18.57         3.45 o
  -7  -2  10         15.67         18.87         3.14 o
  -6  -2  10         42.15         45.13         4.25 o
  -5  -2  10         50.12         39.52         8.57 o
  -4  -2  10         62.63         72.46         5.38 o
  -3  -2  10         31.10         22.71         3.83 o
  -2  -2  10          3.64          4.38         2.37 o
  -1  -2  10         31.26         42.15         7.87 o
   0  -2  10         13.57         19.48         3.94 o
   1  -2  10          4.21          0.24         2.38 o
  -8  -1  10         67.45         67.92         9.69 o
  -7  -1  10         44.50         36.07         5.11 o
  -6  -1  10         20.67         33.92         4.52 o
  -5  -1  10         20.73         16.25         2.76 o
  -4  -1  10         21.15         20.97         2.63 o
  -3  -1  10         34.96         25.41         2.78 o
  -2  -1  10          8.54          6.58         2.05 o
  -1  -1  10         25.90         30.57         3.73 o
   0  -1  10          0.72         -0.37         1.39 o
   1  -1  10          5.29          1.36         2.58 o
  -8   0  10         35.84         33.50         4.36 o
  -7   0  10         19.51         18.32         2.72 o
  -6   0  10         52.06         51.72         4.06 o
  -5   0  10         47.58         48.56         3.92 o
  -4   0  10          6.11          1.85         1.66 o
  -3   0  10          8.70          8.04         1.87 o
  -2   0  10         45.69         48.06         4.34 o
  -1   0  10         80.22         92.72         5.43 o
   0   0  10          4.63          6.24         1.91 o
   1   0  10          3.65          4.13         2.58 o
  -8   1  10         67.47         78.63         7.89 o
  -7   1  10         44.54         47.84         6.97 o
  -6   1  10         20.67         19.70         2.64 o
  -5   1  10         20.70         20.74         2.69 o
  -4   1  10         21.12         21.09         2.70 o
  -3   1  10         35.00         31.22         3.02 o
  -2   1  10          8.52          5.17         1.76 o
  -1   1  10         25.97         26.69         4.12 o
   0   1  10          0.73          1.53         1.64 o
   1   1  10          5.29          1.80         2.24 o
  -8   2  10         16.65         21.31         4.61 o
  -7   2  10         15.67         13.94         2.43 o
  -6   2  10         42.21         45.07         3.87 o
  -5   2  10         50.07         46.13         3.24 o
  -4   2  10         62.70         69.62         4.53 o
  -3   2  10         31.16         31.92         3.07 o
  -2   2  10          3.66          2.30         4.20 o
  -1   2  10         31.29         50.71         9.26 o
   0   2  10         13.54         18.10         4.71 o
   1   2  10          4.22          2.43         2.04 o
  -8   3  10         38.90         35.59         5.52 o
  -7   3  10         29.95         31.28         3.47 o
  -6   3  10         19.08         15.52         2.53 o
  -5   3  10         14.20         15.62         2.34 o
  -4   3  10          6.18          6.20         2.09 o
  -3   3  10         47.52         62.75         5.28 o
  -2   3  10          1.18          0.38         1.54 o
  -1   3  10         27.26         27.27         5.30 o
   0   3  10         21.14         20.08         7.46 o
  -7   4  10          1.58          2.65         1.88 o
  -6   4  10          3.49          1.52         1.58 o
  -5   4  10         19.61         24.25         3.45 o
  -4   4  10         41.24         46.83         4.82 o
  -3   4  10          3.66         -0.12         1.52 o
  -2   4  10         10.33         10.51         2.92 o
  -1   4  10         61.09         63.73         5.92 o
   0   4  10         43.66         74.71         8.07 o
  -6   5  10         26.94         34.37         9.53 o
  -5   5  10          8.96         10.72         3.55 o
  -4   5  10          7.02          8.47         3.05 o
  -3   5  10         19.67         24.40         4.66 o
  -2   5  10         13.09         13.83         3.54 o
  -1   5  10         36.32         36.46         6.32 o
  -6  -3  11          2.74          1.68         2.30 o
  -5  -3  11         12.31          9.72         2.95 o
  -4  -3  11         31.29         37.12         6.88 o
  -3  -3  11         33.24         37.43         8.07 o
  -2  -3  11         24.29         19.15         6.08 o
  -7  -2  11         40.49         40.08        11.03 o
  -6  -2  11          6.96          5.29         2.37 o
  -5  -2  11          9.81          9.32         2.36 o
  -4  -2  11         40.59         39.96         5.37 o
  -3  -2  11         14.75          9.33         3.48 o
  -2  -2  11          5.44          3.95         2.31 o
  -7  -1  11          6.17          1.92         2.34 o
  -6  -1  11          0.74          0.75         1.54 o
  -5  -1  11          1.34          1.99         1.87 o
  -4  -1  11         13.29         10.56         2.40 o
  -3  -1  11          4.14          4.79         1.94 o
  -2  -1  11          9.21         10.92         3.63 o
  -1  -1  11          1.00          1.82         7.07 o
  -7   0  11         36.34         41.21         4.64 o
  -6   0  11         38.40         35.31         4.93 o
  -5   0  11          5.50          5.18         1.79 o
  -4   0  11         35.54         44.57         4.60 o
  -3   0  11         11.47         10.16         2.49 o
  -2   0  11          4.17          4.01         2.12 o
  -1   0  11          3.63          1.45         1.79 o
  -7   1  11          6.19          6.16         2.23 o
  -6   1  11          0.74          0.17         1.42 o
  -5   1  11          1.35         -0.42         1.36 o
  -4   1  11         13.30         13.20         2.94 o
  -3   1  11          4.13          3.27         2.09 o
  -2   1  11          9.19         15.45         3.33 o
  -1   1  11          1.02          1.94         2.01 o
  -7   2  11         40.45         46.82         6.18 o
  -6   2  11          6.99          7.49         2.33 o
  -5   2  11          9.78          9.56         2.56 o
  -4   2  11         40.55         41.17         7.13 o
  -3   2  11         14.73         12.36         5.54 o
  -2   2  11          5.45          5.00         2.47 o
  -6   3  11          2.72          0.76         2.30 o
  -5   3  11         12.32         11.85         3.50 o
  -4   3  11         31.22         38.65         7.56 o
  -3   3  11         33.21         26.92         4.20 o
  -2   3  11         24.28         27.97         4.22 o
                                                
