# Supplementary material for: Expanding the antibacterial selectivity of polyether ionophore antibiotics through diversity-focused semisynthesis
Source: Springer Nature journal article supplement (doi:10.1038/s41557-020-00601-1), 2020-12-22
Supplement: 41557_2020_601_MOESM33_ESM.mol [file 41557_2020_601_MOESM33_ESM.mol]

nchem.19061130C-comp14.mol
  ChemDraw11042002272D

 19 19  0  0  1  0  0  0  0  0999 V2000
   -0.7145    0.8250    0.0000 C   0  0  0  0  0  0  0  0  0  0  0  0
   -0.7145    0.0000    0.0000 C   0  0  0  0  0  0  0  0  0  0  0  0
   -0.0000   -0.4125    0.0000 O   0  0  0  0  0  0  0  0  0  0  0  0
    0.7145    0.0000    0.0000 C   0  0  0  0  0  0  0  0  0  0  0  0
    0.7145    0.8250    0.0000 C   0  0  0  0  0  0  0  0  0  0  0  0
   -0.0000    1.2375    0.0000 C   0  0  0  0  0  0  0  0  0  0  0  0
    1.4289   -0.4125    0.0000 C   0  0  0  0  0  0  0  0  0  0  0  0
   -1.4289    1.2375    0.0000 C   0  0  0  0  0  0  0  0  0  0  0  0
    1.4289    1.2375    0.0000 C   0  0  0  0  0  0  0  0  0  0  0  0
   -1.4289   -0.4125    0.0000 C   0  0  0  0  0  0  0  0  0  0  0  0
    1.4289   -1.2375    0.0000 C   0  0  0  0  0  0  0  0  0  0  0  0
    2.1434    0.0000    0.0000 C   0  0  0  0  0  0  0  0  0  0  0  0
    2.8579   -0.4125    0.0000 C   0  0  0  0  0  0  0  0  0  0  0  0
    0.7145   -0.8250    0.0000 H   0  0  0  0  0  0  0  0  0  0  0  0
   -2.1434    0.0000    0.0000 C   0  0  0  0  0  0  0  0  0  0  0  0
   -2.1434    0.8250    0.0000 O   0  0  0  0  0  0  0  0  0  0  0  0
   -0.7145   -0.8250    0.0000 H   0  0  0  0  0  0  0  0  0  0  0  0
   -2.8579   -0.4125    0.0000 O   0  0  0  0  0  0  0  0  0  0  0  0
   -2.8579   -1.2338    0.0000 C   0  0  0  0  0  0  0  0  0  0  0  0
 18 19  1  0      
 15 18  1  0      
  1  2  1  0      
  2  3  1  0      
  3  4  1  0      
  4  5  1  0      
  5  6  1  0      
  6  1  1  0      
  4  7  1  0      
  1  8  1  6      
  5  9  1  1      
  2 10  1  0      
  7 11  1  1      
  7 12  1  0      
 12 13  2  0      
  4 14  1  6      
 10 15  1  0      
 15 16  2  0      
  2 17  1  1      
M  STY  1   1 SUP
M  SLB  1   1   1
M  SAL   1  2  18  19
M  SBL   1  1   2
M  SMT   1 OMe
M  SBV   1   2    0.7145    0.4125
M  END
