# Supplementary material for: Expanding the antibacterial selectivity of polyether ionophore antibiotics through diversity-focused semisynthesis
Source: Springer Nature journal article supplement (doi:10.1038/s41557-020-00601-1), 2020-12-22
Supplement: 41557_2020_601_MOESM63_ESM.mol [file 41557_2020_601_MOESM63_ESM.mol]

nchem.19061130C-comp27.mol
  ChemDraw11042002272D

 45 47  0  0  1  0  0  0  0  0999 V2000
   -0.7139   -0.3075    0.0000 C   0  0  0  0  0  0  0  0  0  0  0  0
    0.0006    0.1050    0.0000 C   0  0  0  0  0  0  0  0  0  0  0  0
    0.7151   -0.3075    0.0000 C   0  0  0  0  0  0  0  0  0  0  0  0
    1.4295    0.1050    0.0000 C   0  0  0  0  0  0  0  0  0  0  0  0
    0.0006    0.9300    0.0000 O   0  0  0  0  0  0  0  0  0  0  0  0
   -0.7139   -1.1325    0.0000 C   0  0  0  0  0  0  0  0  0  0  0  0
    0.7151   -1.1325    0.0000 C   0  0  0  0  0  0  0  0  0  0  0  0
    1.4295   -1.5450    0.0000 C   0  0  0  0  0  0  0  0  0  0  0  0
    2.1832   -0.2305    0.0000 O   0  0  0  0  0  0  0  0  0  0  0  0
    2.7352    0.3826    0.0000 C   0  0  0  0  0  0  0  0  0  0  0  0
    2.3227    1.0970    0.0000 C   0  0  0  0  0  0  0  0  0  0  0  0
    1.5158    0.9255    0.0000 C   0  0  0  0  0  0  0  0  0  0  0  0
    3.5557    0.2963    0.0000 C   0  0  0  0  0  0  0  0  0  0  0  0
    3.8913   -0.4573    0.0000 C   0  0  0  0  0  0  0  0  0  0  0  0
    4.7118   -0.5436    0.0000 C   0  0  0  0  0  0  0  0  0  0  0  0
    5.1967    0.1239    0.0000 C   0  0  0  0  0  0  0  0  0  0  0  0
    4.8611    0.8775    0.0000 C   0  0  0  0  0  0  0  0  0  0  0  0
    4.0406    0.9638    0.0000 O   0  0  0  0  0  0  0  0  0  0  0  0
    3.1432    1.0108    0.0000 H   0  0  0  0  0  0  0  0  0  0  0  0
    5.3460    1.5450    0.0000 C   0  0  0  0  0  0  0  0  0  0  0  0
    6.0172    0.0376    0.0000 C   0  0  0  0  0  0  0  0  0  0  0  0
    5.6092   -0.5906    0.0000 O   0  0  0  0  0  0  0  0  0  0  0  0
    6.4297    0.7521    0.0000 C   0  0  0  0  0  0  0  0  0  0  0  0
    3.1477   -0.3319    0.0000 C   0  0  0  0  0  0  0  0  0  0  0  0
    2.7352   -1.0464    0.0000 C   0  0  0  0  0  0  0  0  0  0  0  0
    1.4295   -0.7200    0.0000 H   0  0  0  0  0  0  0  0  0  0  0  0
    0.9027    1.4775    0.0000 C   0  0  0  0  0  0  0  0  0  0  0  0
   -1.4284    0.1050    0.0000 C   0  0  0  0  0  0  0  0  0  0  0  0
   -2.1428   -0.3075    0.0000 C   0  0  0  0  0  0  0  0  0  0  0  0
   -1.4284    0.9300    0.0000 O   0  0  0  0  0  0  0  0  0  0  0  0
   -2.8573    0.1050    0.0000 C   0  0  0  0  0  0  0  0  0  0  0  0
   -2.1428   -1.1325    0.0000 C   0  0  0  0  0  0  0  0  0  0  0  0
   -2.8573    0.9300    0.0000 C   0  0  0  0  0  0  0  0  0  0  0  0
   -3.5718    1.3425    0.0000 C   0  0  0  0  0  0  0  0  0  0  0  0
   -4.2862    0.9300    0.0000 C   0  0  0  0  0  0  0  0  0  0  0  0
   -4.2862    0.1050    0.0000 C   0  0  0  0  0  0  0  0  0  0  0  0
   -3.5718   -0.3075    0.0000 O   0  0  0  0  0  0  0  0  0  0  0  0
   -5.0007    1.3425    0.0000 C   0  0  0  0  0  0  0  0  0  0  0  0
   -2.1428    1.3425    0.0000 C   0  0  0  0  0  0  0  0  0  0  0  0
   -5.0007   -0.3075    0.0000 C   0  0  0  0  0  0  0  0  0  0  0  0
   -5.7152    0.1050    0.0000 C   0  0  0  0  0  0  0  0  0  0  0  0
   -6.4297   -0.3075    0.0000 O   0  0  0  0  0  0  0  0  0  0  0  0
   -5.7152    0.9300    0.0000 O   0  0  0  0  0  0  0  0  0  0  0  0
   -2.8573   -0.7200    0.0000 H   0  0  0  0  0  0  0  0  0  0  0  0
   -4.2862   -0.7200    0.0000 H   0  0  0  0  0  0  0  0  0  0  0  0
  1  2  1  0      
  2  3  1  0      
  3  4  1  0      
  2  5  2  0      
  1  6  1  1      
  3  7  1  1      
  7  8  1  0      
  4  9  1  0      
  9 10  1  0      
 10 11  1  0      
 11 12  1  0      
 12  4  1  0      
 10 13  1  0      
 13 14  1  0      
 14 15  1  0      
 15 16  1  0      
 16 17  1  0      
 17 18  1  0      
 18 13  1  0      
 13 19  1  1      
 17 20  1  1      
 16 21  1  0      
 16 22  1  6      
 21 23  1  0      
 10 24  1  6      
 24 25  1  0      
  4 26  1  1      
 12 27  1  1      
  1 28  1  0      
 28 29  1  0      
 28 30  1  1      
 29 31  1  0      
 29 32  1  1      
 31 33  1  0      
 33 34  1  0      
 34 35  1  0      
 35 36  1  0      
 36 37  1  0      
 37 31  1  0      
 35 38  1  6      
 33 39  1  1      
 36 40  1  0      
 40 41  1  0      
 41 42  1  0      
 41 43  2  0      
 31 44  1  6      
 36 45  1  1      
M  END
