# Supplementary material for: Expanding the antibacterial selectivity of polyether ionophore antibiotics through diversity-focused semisynthesis
Source: Springer Nature journal article supplement (doi:10.1038/s41557-020-00601-1), 2020-12-22
Supplement: 41557_2020_601_MOESM69_ESM.cif [file 41557_2020_601_MOESM69_ESM.cif]

data_exp_64
_audit_creation_date               2019-05-24
_audit_creation_method
;
Olex2 1.2
(compiled 2018.05.29 svn.r3508 for OlexSys, GUI svn.r5506)
;
_shelx_SHELXL_version_number       '2016/6'
_audit_contact_author_address      ?
_audit_contact_author_email        ?
_audit_contact_author_name         ''
_audit_contact_author_phone        ?
_publ_contact_author_id_orcid      ?
_publ_section_references
;
Dolomanov, O.V., Bourhis, L.J., Gildea, R.J, Howard, J.A.K. & Puschmann, H.
 (2009), J. Appl. Cryst. 42, 339-341.

Sheldrick, G.M. (2015). Acta Cryst. C71, 3-8.
;
_chemical_name_common              ?
_chemical_name_systematic          ?
_chemical_formula_moiety           'C38 H58 Br O10, Na'
_chemical_formula_sum              'C38 H58 Br Na O10'
_chemical_formula_weight           777.74
_chemical_absolute_configuration   ad
_chemical_melting_point            ?
_chemical_oxdiff_formula           'C38 H58 Br Na O10'
loop_
  _atom_type_symbol
  _atom_type_description
  _atom_type_scat_dispersion_real
  _atom_type_scat_dispersion_imag
  _atom_type_scat_source
 'C' 'C' 0.0033 0.0016 'International Tables Vol C Tables 4.2.6.8 and 6.1.1.4'
 'H' 'H' 0.0000 0.0000 'International Tables Vol C Tables 4.2.6.8 and 6.1.1.4'
 'Br' 'Br' -0.2901 2.4595
 'International Tables Vol C Tables 4.2.6.8 and 6.1.1.4'
 'Na' 'Na' 0.0362 0.0249 'International Tables Vol C Tables 4.2.6.8 and 6.1.1.4'
 'O' 'O' 0.0106 0.0060 'International Tables Vol C Tables 4.2.6.8 and 6.1.1.4'

_shelx_space_group_comment
;
The symmetry employed for this shelxl refinement is uniquely defined
by the following loop, which should always be used as a source of
symmetry information in preference to the above space-group names.
They are only intended as comments.
;
_space_group_crystal_system        'orthorhombic'
_space_group_IT_number             19
_space_group_name_H-M_alt          'P 21 21 21'
_space_group_name_Hall             'P 2ac 2ab'
loop_
  _space_group_symop_operation_xyz
 'x, y, z'
 '-x+1/2, -y, z+1/2'
 '-x, y+1/2, -z+1/2'
 'x+1/2, -y+1/2, -z'

_cell_length_a                     17.5111(4)
_cell_length_b                     18.5108(5)
_cell_length_c                     53.5509(11)
_cell_angle_alpha                  90
_cell_angle_beta                   90
_cell_angle_gamma                  90
_cell_volume                       17358.2(7)
_cell_formula_units_Z              16
_cell_measurement_reflns_used      12260
_cell_measurement_temperature      99.9(4)
_cell_measurement_theta_max        22.0820
_cell_measurement_theta_min        1.5990
_shelx_estimated_absorpt_T_max     ?
_shelx_estimated_absorpt_T_min     ?
_exptl_absorpt_coefficient_mu      1.006
_exptl_absorpt_correction_T_max    1.000
_exptl_absorpt_correction_T_min    0.607
_exptl_absorpt_correction_type     gaussian
_exptl_absorpt_process_details
;
CrysAlisPro 1.171.39.46 (Rigaku Oxford Diffraction, 2018)
Numerical absorption correction based on gaussian integration over
			a multifaceted crystal model
Empirical absorption correction using spherical harmonics,
 implemented in SCALE3 ABSPACK scaling algorithm.
;
_exptl_absorpt_special_details     ?
_exptl_crystal_colour              'clear colourless'
_exptl_crystal_colour_lustre       clear
_exptl_crystal_colour_modifier     .
_exptl_crystal_colour_primary      colourless
_exptl_crystal_density_diffrn      1.190
_exptl_crystal_density_meas        ?
_exptl_crystal_density_method      ?
_exptl_crystal_description         block
_exptl_crystal_F_000               6592
loop_
  _exptl_crystal_face_index_h
  _exptl_crystal_face_index_k
  _exptl_crystal_face_index_l
  _exptl_crystal_face_perp_dist
 -1 2 -5 0.0984
 3 -5 -5 0.1060
 -1 0 -5 0.1662
 0 0 -1 0.1055
 0 0 1 0.1623
 -2 5 1 0.1472
 -2 -2 -5 0.2166
 1 5 -3 0.1561
 5 0 -4 0.1814
 -5 0 4 0.1814
 1 -1 5 0.1397
 1 -2 5 0.0984

_exptl_crystal_preparation         ?
_exptl_crystal_recrystallization_method  'Crystallized in acetonitrile'
_exptl_crystal_size_max            0.523
_exptl_crystal_size_mid            0.353
_exptl_crystal_size_min            0.197
loop_
  _exptl_oxdiff_crystal_face_indexfrac_h
  _exptl_oxdiff_crystal_face_indexfrac_k
  _exptl_oxdiff_crystal_face_indexfrac_l
  _exptl_oxdiff_crystal_face_x
  _exptl_oxdiff_crystal_face_y
  _exptl_oxdiff_crystal_face_z
 -1.0108 2.0018 -4.9740 0.0014 0.0141 -0.1081
 2.9138 -5.0493 -5.1121 -0.1706 -0.1067 0.1247
 -1.0339 0.0008 -4.9354 -0.0511 0.0244 -0.0531
 -0.0065 -0.0022 -1.0008 -0.0096 -0.0030 -0.0086
 0.0065 0.0022 1.0008 0.0096 0.0030 0.0086
 -1.9385 5.0286 1.0409 0.1349 0.0556 -0.1491
 -2.0582 -1.9883 -4.8285 -0.1064 0.0740 -0.0082
 1.0393 4.9840 -3.1670 0.1051 -0.0739 -0.1532
 4.9804 -0.0683 -4.3445 -0.0241 -0.2080 0.0160
 -4.9804 0.0683 4.3445 0.0241 0.2080 -0.0160
 1.0224 -1.0013 4.9547 0.0248 -0.0193 0.0806
 1.0108 -2.0018 4.9740 -0.0014 -0.0141 0.1081

_exptl_transmission_factor_max     ?
_exptl_transmission_factor_min     ?
_diffrn_reflns_av_R_equivalents    0.0443
_diffrn_reflns_av_unetI/netI       0.0691
_diffrn_reflns_Laue_measured_fraction_full  0.998
_diffrn_reflns_Laue_measured_fraction_max  0.998
_diffrn_reflns_limit_h_max         17
_diffrn_reflns_limit_h_min         -13
_diffrn_reflns_limit_k_max         18
_diffrn_reflns_limit_k_min         -11
_diffrn_reflns_limit_l_max         35
_diffrn_reflns_limit_l_min         -53
_diffrn_reflns_number              35203
_diffrn_reflns_point_group_measured_fraction_full  0.965
_diffrn_reflns_point_group_measured_fraction_max  0.965
_diffrn_reflns_theta_full          20.816
_diffrn_reflns_theta_max           20.82
_diffrn_reflns_theta_min           1.58
_diffrn_ambient_environment        N~2~
_diffrn_ambient_temperature        99.9(4)
_diffrn_detector                   'CCD plate'
_diffrn_detector_area_resol_mean   10.3590
_diffrn_detector_type              Atlas
_diffrn_measured_fraction_theta_full  0.9977
_diffrn_measured_fraction_theta_max  0.9646
_diffrn_measurement_details
;
List of Runs (angles in degrees, time in seconds):

  # Type    Start    End  Width  t~exp~   \w     \q     \k     \f   Frames
--------------------------------------------------------------------------
  1  \w   -122.00   2.20   0.30   43.33    --  -13.63 -66.00 131.00  414
  2  \w     44.00  77.90   0.30   43.33    --  -13.63 178.00-180.00  113
  3  \w     53.00  83.00   0.30   43.33    --  -13.63 178.00 150.00  100
;
_diffrn_measurement_device         'four-circle diffractometer'
_diffrn_measurement_device_type   
 'SuperNova, Single source at offset/far, Atlas'
_diffrn_measurement_method         '\w scans'
_diffrn_orient_matrix_type        
 'CrysAlisPro convention (1999,Acta A55,543-557)'
_diffrn_orient_matrix_UB_11        0.0038502000
_diffrn_orient_matrix_UB_12        0.0263398000
_diffrn_orient_matrix_UB_13        0.0095421000
_diffrn_orient_matrix_UB_21        -0.0390116000
_diffrn_orient_matrix_UB_22        -0.0046424000
_diffrn_orient_matrix_UB_23        0.0032206000
_diffrn_orient_matrix_UB_31        0.0103269000
_diffrn_orient_matrix_UB_32        -0.0274389000
_diffrn_orient_matrix_UB_33        0.0085870000
_diffrn_radiation_monochromator    mirror
_diffrn_radiation_probe            x-ray
_diffrn_radiation_type             'Mo K\a'
_diffrn_radiation_wavelength       0.71073
_diffrn_source                     'micro-focus sealed X-ray tube'
_diffrn_source_type                'SuperNova (Mo) X-ray Source'
_reflns_Friedel_coverage           0.766
_reflns_Friedel_fraction_full      0.924
_reflns_Friedel_fraction_max       0.924
_reflns_number_gt                  14358
_reflns_number_total               17560
_reflns_odcompleteness_completeness  99.77
_reflns_odcompleteness_iscentric   1
_reflns_odcompleteness_theta       20.77
_reflns_special_details
;
 Reflections were merged by SHELXL according to the crystal
 class for the calculation of statistics and refinement.
 
 Structure factors included contributions from the .fab file.
 
 _reflns_Friedel_fraction is defined as the number of unique
 Friedel pairs measured divided by the number that would be
 possible theoretically, ignoring centric projections and
 systematic absences.
;
_reflns_threshold_expression       'I > 2\s(I)'
_computing_cell_refinement         'CrysAlisPro 1.171.39.46 (Rigaku OD, 2018)'
_computing_data_collection         'CrysAlisPro 1.171.39.46 (Rigaku OD, 2018)'
_computing_data_reduction          'CrysAlisPro 1.171.39.46 (Rigaku OD, 2018)'
_computing_molecular_graphics      'Olex2 (Dolomanov et al., 2009)'
_computing_publication_material    'Olex2 (Dolomanov et al., 2009)'
_computing_structure_refinement    'ShelXL (Sheldrick, 2015)'
_computing_structure_solution      'SHELXT 2018/2 (Sheldrick, 2018)'
_refine_diff_density_max           1.118
_refine_diff_density_min           -0.427
_refine_diff_density_rms           0.105
_refine_ls_abs_structure_details
;
 Flack x determined using 4786 quotients [(I+)-(I-)]/[(I+)+(I-)]
 (Parsons, Flack and Wagner, Acta Cryst. B69 (2013) 249-259).
;
_refine_ls_abs_structure_Flack     0.055(5)
_refine_ls_extinction_coef         0.0025(3)
_refine_ls_extinction_expression  
 'Fc^*^=kFc[1+0.001xFc^2^\l^3^/sin(2\q)]^-1/4^'
_refine_ls_extinction_method       'SHELXL-2016/6 (Sheldrick 2016)'
_refine_ls_goodness_of_fit_ref     1.040
_refine_ls_hydrogen_treatment      constr
_refine_ls_matrix_type             full
_refine_ls_number_parameters       1759
_refine_ls_number_reflns           17560
_refine_ls_number_restraints       1578
_refine_ls_R_factor_all            0.0977
_refine_ls_R_factor_gt             0.0844
_refine_ls_restrained_S_all        1.013
_refine_ls_shift/su_max            0.001
_refine_ls_shift/su_mean           0.000
_refine_ls_structure_factor_coef   Fsqd
_refine_ls_weighting_details      
 'w=1/[\s^2^(Fo^2^)+(0.1687P)^2^+4.2649P] where P=(Fo^2^+2Fc^2^)/3'
_refine_ls_weighting_scheme        calc
_refine_ls_wR_factor_gt            0.2268
_refine_ls_wR_factor_ref           0.2421
_refine_special_details            ?
_olex2_refinement_description
;
1. Fixed Uiso
 At 1.2 times of:
  All C(H) groups, All C(H,H) groups
 At 1.5 times of:
  All C(H,H,H) groups, All O(H) groups
2. Restrained distances
 C1A-C2A
 1.5 with sigma of 0.02
 O1A-C3A = C3B-O1B
 1.41 with sigma of 0.02
 C3D-O1D = C3C-O1C
 1.41 with sigma of 0.02
 C3A-C1A
 2.5 with sigma of 0.2
3. Uiso/Uaniso restraints and constraints
C2A \\sim C2B: within 1.7A with sigma of 0.04 and sigma for terminal atoms of
0.08
Uanis(C2A) = Uanis(C2B) = Uanis(C2D) = Uanis(C2C)
Uanis(C38C) = Uanis(C38D) = Uanis(C38A)
4. Rigid body (RIGU) restrains
 All non-hydrogen atoms
 with sigma for 1-2 distances of 0.004 and sigma for 1-3 distances of 0.004
5.a Riding coordinates:
 O1C(H1C), O5C(H5C)
5.b Ternary CH refined with riding coordinates:
 C23A(H23A), C25A(H25A), C8B(H8B), C20B(H20B), C23B(H23B), C29B(H29B),
 C16B(H16B), C15A(H15A), C20A(H20A), C26A(H26A), C16A(H16A), C31B(H31B),
 C26B(H26B), C22A(H22A), C25B(H25B), C22B(H22B), C13A(H13A), C22D(H22D),
 C4B(H4B), C31A(H31A), C23D(H23D), C15B(H15B), C8A(H8A), C16D(H16D), C13C(H13C),
  C31D(H31D), C8D(H8D), C16C(H16C), C13D(H13D), C29A(H29A), C6C(H6C), C4D(H4D),
 C13B(H13B), C8C(H8C), C20D(H20D), C29D(H29D), C25D(H25D), C15C(H15C),
 C26D(H26D), C29C(H29C), C20C(H20C), C25C(H25C), C22C(H22C), C15D(H15D),
 C31C(H31C), C23C(H23C), C4A(H4A), C26C(H26C)
5.c Secondary CH2 refined with riding coordinates:
 C7B(H7BA,H7BB), C28B(H28A,H28B), C2B(H2BA,H2BB), C17A(H17C,H17D), C6B(H6BA,
 H6BB), C17B(H17A,H17B), C32B(H32A,H32B), C12B(H12A,H12B), C28A(H28C,H28D),
 C32D(H32E,H32F), C32A(H32C,H32D), C17D(H17E,H17F), C28D(H28E,H28F), C17C(H17G,
 H17H), C7D(H7DA,H7DB), C10A(H10C,H10D), C12C(H12G,H12H), C12D(H12E,H12F),
 C32C(H32G,H32H), C6D(H6DA,H6DB), C10B(H10A,H10B), C2D(H2DA,H2DB), C12A(H12C,
 H12D), C10D(H10E,H10F), C7A(H7AA,H7AB), C5C(H5CA,H5CB), C10C(H10G,H10H),
 C4C(H4CA,H4CB), C6A(H6AA,H6AB), C28C(H28G,H28H), C2A(H2AA,H2AB), C2C(H2CA,H2CB)
5.d Aromatic/amide H refined with riding coordinates:
 C38B(H38B), C38D(H38D), C38C(H38C), C38A(H38A)
5.e Idealised Me refined with riding coordinates:
 C24A(H24D,H24E,H24F), C27B(H27A,H27B,H27C), C24B(H24A,H24B,H24C), C5B(H5BA,
 H5BB,H5BC), C21B(H21A,H21B,H21C), C14A(H14D,H14E,H14F), C1B(H1BA,H1BB,H1BC),
 C30B(H30A,H30B,H30C), C21A(H21D,H21E,H21F), C27A(H27D,H27E,H27F), C18A(H18D,
 H18E,H18F), C24D(H24G,H24H,H24I), C11B(H11A,H11B,H11C), C14D(H14G,H14H,H14I),
 C18B(H18A,H18B,H18C), C27D(H27G,H27H,H27I), C21D(H21G,H21H,H21I), C7C(H7CA,
 H7CB,H7CC), C14B(H14A,H14B,H14C), C18D(H18G,H18H,H18I), C30A(H30D,H30E,H30F),
 C18C(H18J,H18K,H18L), C5D(H5DA,H5DB,H5DC), C11A(H11D,H11E,H11F), C27C(H27J,
 H27K,H27L), C21C(H21J,H21K,H21L), C30D(H30G,H30H,H30I), C1C(H1CA,H1CB,H1CC),
 C14C(H14J,H14K,H14L), C5A(H5AA,H5AB,H5AC), C11D(H11G,H11H,H11I), C30C(H30J,
 H30K,H30L), C1D(H1DA,H1DB,H1DC), C11C(H11J,H11K,H11L), C1A(H1AA,H1AB,H1AC)
5.f Idealised Me refined as rotating group:
 C24C(H24J,H24K,H24L)
5.g Idealised tetrahedral OH refined as rotating group:
 O1B(H1B), O5A(H5A), O5B(H5B), O5D(H5D), O1D(H1D), O1A(H1A)
;
_atom_sites_solution_hydrogens     mixed
_atom_sites_solution_primary       ?
_atom_sites_solution_secondary     ?
loop_
  _atom_site_label
  _atom_site_type_symbol
  _atom_site_fract_x
  _atom_site_fract_y
  _atom_site_fract_z
  _atom_site_U_iso_or_equiv
  _atom_site_adp_type
  _atom_site_occupancy
  _atom_site_site_symmetry_order
  _atom_site_calc_flag
  _atom_site_refinement_flags_posn
  _atom_site_refinement_flags_adp
  _atom_site_refinement_flags_occupancy
  _atom_site_disorder_assembly
  _atom_site_disorder_group
 Br1B Br 0.47262(9) 0.73707(11) 0.60047(3) 0.0768(6) Uani 1 1 d . U . . .
 Br1A Br 0.32978(13) 0.13184(14) 0.55316(5) 0.1207(9) Uani 1 1 d . U . . .
 Br1D Br 0.50635(16) 0.25166(15) 0.64658(4) 0.1298(10) Uani 1 1 d . U . . .
 Na1B Na 0.38920(17) 0.47937(17) 0.49624(6) 0.0101(7) Uiso 1 1 d . U . . .
 Br1C Br 1.1335(2) 0.39644(15) 0.68874(7) 0.1694(15) Uani 1 1 d . U . . .
 Na1A Na 0.18941(18) 0.51718(18) 0.53387(6) 0.0144(8) Uiso 1 1 d . U . . .
 Na1D Na 0.77951(18) 0.32315(17) 0.75074(6) 0.0167(8) Uiso 1 1 d . U . . .
 Na1C Na 0.7335(2) 0.51317(19) 0.71736(6) 0.0223(9) Uiso 1 1 d . U . . .
 O4B O 0.4753(6) 0.5330(5) 0.45558(17) 0.063(3) Uani 1 1 d . U . . .
 O3B O 0.4771(5) 0.3799(4) 0.46907(15) 0.051(2) Uani 1 1 d . U . . .
 O2B O 0.4682(5) 0.3645(4) 0.51994(16) 0.053(2) Uani 1 1 d . U . . .
 O1B O 0.5063(5) 0.5064(4) 0.53507(15) 0.053(2) Uani 1 1 d D U . . .
 H1B H 0.465068 0.518766 0.540957 0.079 Uiso 1 1 calc GR . . . .
 O7B O 0.2781(5) 0.5962(5) 0.49349(16) 0.053(2) Uani 1 1 d . U . . .
 O5A O 0.1025(5) 0.5572(5) 0.48311(16) 0.050(2) Uani 1 1 d . U . . .
 H5A H 0.139501 0.532342 0.479320 0.075 Uiso 1 1 calc GR . . . .
 O5B O 0.3008(5) 0.5329(5) 0.44640(16) 0.056(2) Uani 1 1 d . U . . .
 H5B H 0.280084 0.549537 0.458876 0.083 Uiso 1 1 calc GR . . . .
 O6B O 0.2852(5) 0.7218(4) 0.45228(15) 0.049(2) Uani 1 1 d . U . . .
 O4A O 0.0217(6) 0.5048(5) 0.53197(16) 0.067(3) Uani 1 1 d . U . . .
 O6A O 0.0740(5) 0.3958(5) 0.45245(16) 0.060(2) Uani 1 1 d . U . . .
 O7D O 0.6561(6) 0.4238(6) 0.75514(17) 0.070(3) Uani 1 1 d . U . . .
 O2C O 0.6848(6) 0.4801(6) 0.66838(18) 0.073(3) Uani 1 1 d . U . . .
 O4D O 0.7282(6) 0.2332(6) 0.7901(2) 0.077(3) Uani 1 1 d . U . . .
 O9B O 0.2976(6) 0.8096(6) 0.52766(17) 0.069(3) Uani 1 1 d . U . . .
 O9D O 0.6845(6) 0.3475(6) 0.70931(17) 0.078(3) Uani 1 1 d . U . . .
 O7A O 0.2135(6) 0.4490(5) 0.48640(17) 0.065(3) Uani 1 1 d . U . . .
 O3D O 0.8882(6) 0.2352(6) 0.77581(18) 0.076(3) Uani 1 1 d . U . . .
 O10A O 0.2779(7) 0.3928(6) 0.53273(18) 0.074(3) Uani 1 1 d . U . . .
 O3A O 0.1000(5) 0.6113(6) 0.56312(17) 0.071(3) Uani 1 1 d . U . . .
 O5D O 0.7250(5) 0.3977(6) 0.80108(19) 0.066(3) Uani 1 1 d . U . . .
 H5D H 0.706725 0.412894 0.787995 0.100 Uiso 1 1 calc GR . . . .
 O8B O 0.3650(6) 0.5649(6) 0.53788(17) 0.068(3) Uani 1 1 d . U . . .
 O6D O 0.5277(6) 0.4106(6) 0.79831(17) 0.067(3) Uani 1 1 d . U . . .
 O1C O 0.8425(6) 0.5104(6) 0.67506(17) 0.078(3) Uani 1 1 d D U . . .
 H1C H 0.844296 0.475350 0.684394 0.117 Uiso 1 1 d R . . . .
 O7C O 0.8103(6) 0.4879(7) 0.76380(18) 0.084(3) Uani 1 1 d . U . . .
 O1D O 0.7476(6) 0.2134(6) 0.7110(2) 0.079(3) Uani 1 1 d D U . . .
 H1D H 0.732854 0.253599 0.706754 0.118 Uiso 1 1 calc GR . . . .
 O2D O 0.8963(6) 0.2527(6) 0.7249(2) 0.078(3) Uani 1 1 d . U . . .
 O2A O 0.2314(6) 0.5555(7) 0.58189(18) 0.086(3) Uani 1 1 d . U . . .
 O10D O 0.4868(7) 0.3439(7) 0.6942(2) 0.091(3) Uani 1 1 d . U . . .
 O10C O 0.8672(6) 0.4323(6) 0.71729(18) 0.073(3) Uani 1 1 d . U . . .
 O6C O 0.8687(8) 0.6165(7) 0.8005(2) 0.094(3) Uani 1 1 d . U . . .
 O8D O 0.4272(6) 0.4160(6) 0.7224(2) 0.077(3) Uani 1 1 d . U . . .
 O3C O 0.6232(6) 0.6020(6) 0.69249(17) 0.073(3) Uani 1 1 d . U . . .
 O10B O 0.3701(6) 0.7508(7) 0.5545(2) 0.092(3) Uani 1 1 d . U . . .
 O5C O 0.6928(8) 0.5868(6) 0.7743(2) 0.095(4) Uani 1 1 d . U . . .
 H5C H 0.725669 0.556501 0.771182 0.143 Uiso 1 1 d R . . . .
 O4C O 0.7376(7) 0.6609(6) 0.7251(2) 0.080(3) Uani 1 1 d . U . . .
 C23A C 0.0134(9) 0.5119(7) 0.4520(2) 0.057(3) Uani 1 1 d . U . . .
 H23A H -0.035853 0.487001 0.450655 0.069 Uiso 1 1 calc R . . . .
 C25A C 0.0734(10) 0.4666(8) 0.4396(2) 0.063(3) Uani 1 1 d . U . . .
 H25A H 0.123227 0.489783 0.441955 0.075 Uiso 1 1 calc R . . . .
 C8B C 0.5383(7) 0.3444(7) 0.5075(2) 0.048(3) Uani 1 1 d . U . . .
 H8B H 0.561374 0.303854 0.516515 0.058 Uiso 1 1 calc R . . . .
 C34B C 0.3186(7) 0.6759(7) 0.5238(3) 0.053(3) Uani 1 1 d . U . . .
 C19A C -0.0018(7) 0.5592(8) 0.5223(3) 0.052(3) Uani 1 1 d . U . . .
 C20B C 0.4022(8) 0.5563(7) 0.4186(2) 0.053(3) Uani 1 1 d . U . . .
 H20B H 0.377569 0.525305 0.406178 0.063 Uiso 1 1 calc R . . . .
 O8C O 1.0584(9) 0.4686(8) 0.7778(3) 0.127(5) Uani 1 1 d . U . . .
 C33B C 0.2713(8) 0.6571(8) 0.5026(3) 0.053(3) Uani 1 1 d . U . . .
 C19B C 0.4511(7) 0.5069(7) 0.4356(2) 0.048(3) Uani 1 1 d . U . . .
 C23B C 0.2878(7) 0.6371(7) 0.4191(2) 0.047(3) Uani 1 1 d . U . . .
 H23B H 0.317732 0.672372 0.409571 0.056 Uiso 1 1 calc R . . . .
 C29B C 0.1893(8) 0.8132(7) 0.4603(3) 0.055(3) Uani 1 1 d . U . . .
 H29B H 0.216129 0.847531 0.449448 0.066 Uiso 1 1 calc R . . . .
 C16B C 0.4698(7) 0.4333(7) 0.4280(2) 0.047(3) Uani 1 1 d . U . . .
 H16B H 0.499417 0.438818 0.412576 0.057 Uiso 1 1 calc R . . . .
 C7B C 0.5925(8) 0.4062(7) 0.5078(2) 0.053(3) Uani 1 1 d . U . . .
 H7BA H 0.570394 0.447055 0.499081 0.064 Uiso 1 1 calc R . . . .
 H7BB H 0.639459 0.392824 0.499420 0.064 Uiso 1 1 calc R . . . .
 C35B C 0.3253(9) 0.7506(9) 0.5336(3) 0.065(3) Uani 1 1 d . U . . .
 C15A C 0.0192(8) 0.6197(8) 0.5630(2) 0.055(3) Uani 1 1 d . U . . .
 H15A H -0.003301 0.575822 0.570180 0.066 Uiso 1 1 calc R . . . .
 C20A C -0.0275(8) 0.5574(8) 0.4951(2) 0.055(3) Uani 1 1 d . U . . .
 H20A H -0.030196 0.607487 0.489237 0.066 Uiso 1 1 calc R . . . .
 C26A C 0.0599(9) 0.4531(8) 0.4102(3) 0.063(3) Uani 1 1 d . U . . .
 H26A H 0.067880 0.498879 0.401357 0.075 Uiso 1 1 calc R . . . .
 C16A C -0.0092(8) 0.6270(7) 0.5365(2) 0.050(3) Uani 1 1 d . U . . .
 H16A H -0.064097 0.636868 0.537686 0.060 Uiso 1 1 calc R . . . .
 C31B C 0.2483(7) 0.7617(8) 0.4724(2) 0.055(3) Uani 1 1 d . U . . .
 H31B H 0.287092 0.791164 0.480762 0.066 Uiso 1 1 calc R . . . .
 C24A C 0.0076(10) 0.5845(8) 0.4388(3) 0.074(4) Uani 1 1 d . U . . .
 H24D H 0.057411 0.605951 0.437709 0.111 Uiso 1 1 calc R . . . .
 H24E H -0.025719 0.615742 0.448033 0.111 Uiso 1 1 calc R . . . .
 H24F H -0.012464 0.577508 0.422274 0.111 Uiso 1 1 calc R . . . .
 O1A O 0.2027(8) 0.4042(8) 0.5772(2) 0.114(4) Uani 1 1 d D U . . .
 H1A H 0.221889 0.418982 0.564213 0.171 Uiso 1 1 calc GR . . . .
 C26B C 0.1758(8) 0.7284(7) 0.4238(2) 0.055(3) Uani 1 1 d . U . . .
 H26B H 0.138208 0.698066 0.415231 0.066 Uiso 1 1 calc R . . . .
 C33D C 0.5901(9) 0.4315(8) 0.7482(2) 0.054(3) Uani 1 1 d . U . . .
 C28B C 0.1317(7) 0.7743(9) 0.4455(3) 0.066(4) Uani 1 1 d . U . . .
 H28A H 0.096474 0.808346 0.437950 0.079 Uiso 1 1 calc R . . . .
 H28B H 0.102892 0.741913 0.456160 0.079 Uiso 1 1 calc R . . . .
 C2B C 0.5462(13) 0.4669(12) 0.5758(3) 0.107(3) Uani 1 1 d . U . . .
 H2BA H 0.569422 0.426308 0.584332 0.128 Uiso 1 1 calc R . . . .
 H2BB H 0.496463 0.474992 0.583189 0.128 Uiso 1 1 calc R . . . .
 C17A C 0.0262(8) 0.6926(7) 0.5229(2) 0.053(3) Uani 1 1 d . U . . .
 H17C H 0.065608 0.713534 0.533360 0.064 Uiso 1 1 calc R . . . .
 H17D H 0.050200 0.676195 0.507577 0.064 Uiso 1 1 calc R . . . .
 C22A C 0.0350(8) 0.5175(7) 0.4792(2) 0.050(3) Uani 1 1 d . U . . .
 H22A H 0.042021 0.468707 0.485887 0.060 Uiso 1 1 calc R . . . .
 C9A C 0.1321(9) 0.6399(11) 0.5866(3) 0.078(4) Uani 1 1 d . U . . .
 C25B C 0.2324(8) 0.6802(8) 0.4363(2) 0.054(3) Uani 1 1 d . U . . .
 H25B H 0.204653 0.645744 0.446820 0.065 Uiso 1 1 calc R . . . .
 C34D C 0.5641(8) 0.3930(8) 0.7250(3) 0.058(3) Uani 1 1 d . U . . .
 C22B C 0.3415(8) 0.5920(7) 0.4328(2) 0.047(3) Uani 1 1 d . U . . .
 H22B H 0.366031 0.622694 0.445370 0.057 Uiso 1 1 calc R . . . .
 C6B C 0.6099(8) 0.4275(8) 0.5352(3) 0.061(3) Uani 1 1 d . U . . .
 H6BA H 0.634719 0.387580 0.543685 0.074 Uiso 1 1 calc R . . . .
 H6BB H 0.644305 0.468599 0.535508 0.074 Uiso 1 1 calc R . . . .
 C36B C 0.3601(7) 0.6344(8) 0.5397(2) 0.051(3) Uani 1 1 d . U . . .
 C37B C 0.3939(8) 0.6734(11) 0.5584(2) 0.069(4) Uani 1 1 d . U . . .
 C17B C 0.4027(7) 0.3888(8) 0.4207(2) 0.051(3) Uani 1 1 d . U . . .
 H17A H 0.356908 0.416952 0.423766 0.061 Uiso 1 1 calc R . . . .
 H17B H 0.400706 0.347013 0.431647 0.061 Uiso 1 1 calc R . . . .
 C3B C 0.5353(8) 0.4469(7) 0.5488(2) 0.049(3) Uani 1 1 d D U . . .
 C13A C 0.0033(9) 0.6814(10) 0.5807(3) 0.077(4) Uani 1 1 d . U . . .
 H13A H 0.015353 0.727664 0.572686 0.092 Uiso 1 1 calc R . . . .
 C27B C 0.2085(8) 0.7823(9) 0.4049(3) 0.066(4) Uani 1 1 d . U . . .
 H27A H 0.247340 0.810950 0.412775 0.099 Uiso 1 1 calc R . . . .
 H27B H 0.168405 0.813276 0.398987 0.099 Uiso 1 1 calc R . . . .
 H27C H 0.230236 0.756475 0.391069 0.099 Uiso 1 1 calc R . . . .
 O8A O 0.2293(8) 0.2188(6) 0.4687(3) 0.113(4) Uani 1 1 d . U . . .
 C22D C 0.6682(9) 0.3596(9) 0.8146(3) 0.070(4) Uani 1 1 d . U . . .
 H22D H 0.634582 0.336502 0.802325 0.084 Uiso 1 1 calc R . . . .
 C4B C 0.4801(9) 0.3843(7) 0.5468(2) 0.059(3) Uani 1 1 d . U . . .
 H4B H 0.430883 0.402073 0.552937 0.071 Uiso 1 1 calc R . . . .
 C32B C 0.2154(8) 0.7098(7) 0.4913(3) 0.053(3) Uani 1 1 d . U . . .
 H32A H 0.192560 0.737669 0.504744 0.063 Uiso 1 1 calc R . . . .
 H32B H 0.174766 0.682554 0.483388 0.063 Uiso 1 1 calc R . . . .
 C33A C 0.2191(9) 0.3868(8) 0.4772(3) 0.066(4) Uani 1 1 d . U . . .
 C12B C 0.5775(9) 0.2955(7) 0.4655(2) 0.059(3) Uani 1 1 d . U . . .
 H12A H 0.581865 0.243232 0.465047 0.071 Uiso 1 1 calc R . . . .
 H12B H 0.624967 0.315522 0.471776 0.071 Uiso 1 1 calc R . . . .
 C37A C 0.2848(8) 0.2719(11) 0.5290(4) 0.094(5) Uani 1 1 d . U . . .
 C24B C 0.2402(8) 0.5919(7) 0.3997(3) 0.053(3) Uani 1 1 d . U . . .
 H24A H 0.271417 0.553961 0.393011 0.080 Uiso 1 1 calc R . . . .
 H24B H 0.223383 0.622844 0.386429 0.080 Uiso 1 1 calc R . . . .
 H24C H 0.196552 0.571220 0.407914 0.080 Uiso 1 1 calc R . . . .
 C3D C 0.8121(9) 0.1909(10) 0.6950(3) 0.075(4) Uani 1 1 d D U . . .
 C9B C 0.5127(7) 0.3178(7) 0.4813(2) 0.051(3) Uani 1 1 d . U . . .
 C31A C 0.1283(8) 0.3486(7) 0.4440(2) 0.055(3) Uani 1 1 d . U . . .
 H31A H 0.118839 0.303797 0.453236 0.066 Uiso 1 1 calc R . . . .
 C28A C 0.1246(11) 0.3989(8) 0.4022(3) 0.086(5) Uani 1 1 d . U . . .
 H28C H 0.119127 0.387636 0.384576 0.103 Uiso 1 1 calc R . . . .
 H28D H 0.174038 0.421584 0.404536 0.103 Uiso 1 1 calc R . . . .
 C5B C 0.4982(10) 0.3167(7) 0.5618(3) 0.070(4) Uani 1 1 d . U . . .
 H5BA H 0.552569 0.310502 0.562808 0.105 Uiso 1 1 calc R . . . .
 H5BB H 0.475913 0.275400 0.553784 0.105 Uiso 1 1 calc R . . . .
 H5BC H 0.477582 0.321457 0.578345 0.105 Uiso 1 1 calc R . . . .
 C36A C 0.2704(9) 0.3402(10) 0.5203(4) 0.074(4) Uani 1 1 d . U . . .
 C3C C 0.8151(10) 0.4877(12) 0.6515(2) 0.086(4) Uani 1 1 d D U . . .
 C23D C 0.6198(9) 0.4072(9) 0.8303(3) 0.070(4) Uani 1 1 d . U . . .
 H23D H 0.585349 0.375811 0.839769 0.084 Uiso 1 1 calc R . . . .
 C21B C 0.4537(9) 0.6067(8) 0.4049(3) 0.068(4) Uani 1 1 d . U . . .
 H21A H 0.425647 0.629975 0.391755 0.102 Uiso 1 1 calc R . . . .
 H21B H 0.495519 0.580054 0.397853 0.102 Uiso 1 1 calc R . . . .
 H21C H 0.473033 0.642496 0.416212 0.102 Uiso 1 1 calc R . . . .
 C15B C 0.5245(8) 0.3958(8) 0.4463(2) 0.051(3) Uani 1 1 d . U . . .
 H15B H 0.565156 0.429661 0.450870 0.061 Uiso 1 1 calc R . . . .
 C8A C 0.1724(9) 0.5755(11) 0.5997(3) 0.085(4) Uani 1 1 d . U . . .
 H8A H 0.197832 0.594385 0.614607 0.102 Uiso 1 1 calc R . . . .
 C14A C -0.0802(8) 0.6823(10) 0.5910(3) 0.071(4) Uani 1 1 d . U . . .
 H14D H -0.093725 0.634822 0.596680 0.107 Uiso 1 1 calc R . . . .
 H14E H -0.114583 0.697087 0.578046 0.107 Uiso 1 1 calc R . . . .
 H14F H -0.083424 0.715663 0.604728 0.107 Uiso 1 1 calc R . . . .
 C35D C 0.4885(10) 0.3891(11) 0.7154(3) 0.080(5) Uani 1 1 d . U . . .
 C9C C 0.5944(10) 0.5771(10) 0.6681(3) 0.082(4) Uani 1 1 d . U . . .
 C34A C 0.2407(8) 0.3273(8) 0.4955(3) 0.067(3) Uani 1 1 d . U . . .
 C34C C 0.9381(11) 0.4628(8) 0.7543(3) 0.078(4) Uani 1 1 d . U . . .
 C16D C 0.8366(9) 0.2390(9) 0.8176(3) 0.077(4) Uani 1 1 d . U . . .
 H16D H 0.832273 0.210986 0.833101 0.093 Uiso 1 1 calc R . . . .
 C13C C 0.5560(11) 0.7025(10) 0.6753(3) 0.092(5) Uani 1 1 d . U . . .
 H13C H 0.506657 0.697838 0.683823 0.110 Uiso 1 1 calc R . . . .
 C31D C 0.4837(9) 0.4490(8) 0.7797(3) 0.064(3) Uani 1 1 d . U . . .
 H31D H 0.453188 0.412190 0.771178 0.077 Uiso 1 1 calc R . . . .
 C37D C 0.5695(11) 0.3262(9) 0.6905(3) 0.079(4) Uani 1 1 d . U . . .
 C1B C 0.5963(10) 0.5350(9) 0.5803(3) 0.075(4) Uani 1 1 d . U . . .
 H1BA H 0.647556 0.525678 0.574817 0.112 Uiso 1 1 calc R . . . .
 H1BB H 0.596663 0.546238 0.597829 0.112 Uiso 1 1 calc R . . . .
 H1BC H 0.575683 0.575056 0.571170 0.112 Uiso 1 1 calc R . . . .
 C8D C 0.9246(10) 0.1884(8) 0.7361(3) 0.074(4) Uani 1 1 d . U . . .
 H8D H 0.968369 0.171722 0.726263 0.088 Uiso 1 1 calc R . . . .
 C16C C 0.6089(10) 0.7029(9) 0.7190(3) 0.080(4) Uani 1 1 d . U . . .
 H16C H 0.603597 0.755592 0.718183 0.096 Uiso 1 1 calc R . . . .
 C36D C 0.6155(10) 0.3544(10) 0.7098(3) 0.072(4) Uani 1 1 d . U . . .
 C30B C 0.1495(9) 0.8554(8) 0.4819(3) 0.065(4) Uani 1 1 d . U . . .
 H30A H 0.112903 0.888517 0.475081 0.097 Uiso 1 1 calc R . . . .
 H30B H 0.187207 0.881759 0.491242 0.097 Uiso 1 1 calc R . . . .
 H30C H 0.124055 0.821897 0.492784 0.097 Uiso 1 1 calc R . . . .
 C19C C 0.6853(12) 0.6865(9) 0.7342(3) 0.083(4) Uani 1 1 d . U . . .
 O9C O 1.0551(8) 0.4397(8) 0.7362(3) 0.121(4) Uani 1 1 d . U . . .
 C32D C 0.5346(9) 0.4825(9) 0.7595(3) 0.072(4) Uani 1 1 d . U . . .
 H32E H 0.502291 0.501790 0.746430 0.087 Uiso 1 1 calc R . . . .
 H32F H 0.562540 0.522601 0.766798 0.087 Uiso 1 1 calc R . . . .
 C36C C 0.9257(10) 0.4415(9) 0.7287(3) 0.075(4) Uani 1 1 d . U . . .
 C13D C 0.9499(11) 0.1627(9) 0.8034(3) 0.090(5) Uani 1 1 d . U . . .
 H13D H 0.980934 0.201475 0.810601 0.108 Uiso 1 1 calc R . . . .
 C29A C 0.1213(10) 0.3283(8) 0.4175(3) 0.074(4) Uani 1 1 d . U . . .
 H29A H 0.070260 0.307657 0.415189 0.089 Uiso 1 1 calc R . . . .
 C37C C 1.0001(10) 0.4282(8) 0.7179(4) 0.075(4) Uani 1 1 d . U . . .
 C32A C 0.2110(8) 0.3722(9) 0.4518(3) 0.071(4) Uani 1 1 d . U . . .
 H32C H 0.246451 0.334117 0.447279 0.085 Uiso 1 1 calc R . . . .
 H32D H 0.224966 0.415032 0.442445 0.085 Uiso 1 1 calc R . . . .
 C6C C 0.7444(10) 0.4381(11) 0.6550(3) 0.083(4) Uani 1 1 d . U . . .
 H6C H 0.760254 0.399454 0.666357 0.100 Uiso 1 1 calc R . . . .
 C19D C 0.7604(10) 0.2575(8) 0.8095(3) 0.074(4) Uani 1 1 d . U . . .
 C4D C 0.8711(10) 0.2472(10) 0.6983(3) 0.082(4) Uani 1 1 d . U . . .
 H4D H 0.848518 0.293680 0.693630 0.098 Uiso 1 1 calc R . . . .
 C17D C 0.8818(9) 0.3098(8) 0.8235(3) 0.067(4) Uani 1 1 d . U . . .
 H17E H 0.846372 0.350024 0.824125 0.080 Uiso 1 1 calc R . . . .
 H17F H 0.917853 0.318915 0.810162 0.080 Uiso 1 1 calc R . . . .
 C33C C 0.8800(11) 0.4785(9) 0.7716(3) 0.080(4) Uani 1 1 d . U . . .
 O9A O 0.2702(9) 0.2167(8) 0.5095(3) 0.129(5) Uani 1 1 d . U . . .
 C21A C -0.1094(8) 0.5257(8) 0.4940(3) 0.063(4) Uani 1 1 d . U . . .
 H21D H -0.109743 0.478688 0.501568 0.095 Uiso 1 1 calc R . . . .
 H21E H -0.125307 0.521926 0.476917 0.095 Uiso 1 1 calc R . . . .
 H21F H -0.143787 0.556923 0.502881 0.095 Uiso 1 1 calc R . . . .
 C13B C 0.5592(8) 0.3252(9) 0.4399(3) 0.065(4) Uani 1 1 d . U . . .
 H13B H 0.520073 0.294583 0.432206 0.078 Uiso 1 1 calc R . . . .
 C9D C 0.9532(9) 0.2098(8) 0.7615(3) 0.074(3) Uani 1 1 d . U . . .
 C27A C -0.0183(10) 0.4273(8) 0.4048(3) 0.078(4) Uani 1 1 d . U . . .
 H27D H -0.025634 0.424782 0.387058 0.117 Uiso 1 1 calc R . . . .
 H27E H -0.054708 0.460110 0.411907 0.117 Uiso 1 1 calc R . . . .
 H27F H -0.025185 0.380158 0.411939 0.117 Uiso 1 1 calc R . . . .
 C8C C 0.6667(10) 0.5486(10) 0.6539(3) 0.072(4) Uani 1 1 d . U . . .
 H8C H 0.649728 0.533653 0.637252 0.087 Uiso 1 1 calc R . . . .
 C18A C -0.0322(9) 0.7505(9) 0.5166(3) 0.090(5) Uani 1 1 d . U . . .
 H18D H -0.072274 0.729773 0.506690 0.135 Uiso 1 1 calc R . . . .
 H18E H -0.007873 0.788566 0.507388 0.135 Uiso 1 1 calc R . . . .
 H18F H -0.053299 0.769680 0.531754 0.135 Uiso 1 1 calc R . . . .
 C20D C 0.7102(10) 0.2988(9) 0.8286(3) 0.078(4) Uani 1 1 d . U . . .
 H20D H 0.742974 0.320008 0.841491 0.094 Uiso 1 1 calc R . . . .
 C28D C 0.4731(11) 0.5538(11) 0.8088(3) 0.090(5) Uani 1 1 d . U . . .
 H28E H 0.439663 0.587890 0.817166 0.109 Uiso 1 1 calc R . . . .
 H28F H 0.508488 0.580583 0.798399 0.109 Uiso 1 1 calc R . . . .
 C29D C 0.4252(10) 0.5000(11) 0.7925(3) 0.089(5) Uani 1 1 d . U . . .
 H29D H 0.390712 0.472020 0.803204 0.107 Uiso 1 1 calc R . . . .
 C24D C 0.6687(10) 0.4480(11) 0.8493(3) 0.086(5) Uani 1 1 d . U . . .
 H24G H 0.704822 0.477989 0.840643 0.129 Uiso 1 1 calc R . . . .
 H24H H 0.695526 0.414078 0.859609 0.129 Uiso 1 1 calc R . . . .
 H24I H 0.636421 0.477686 0.859530 0.129 Uiso 1 1 calc R . . . .
 C17C C 0.5334(10) 0.6724(10) 0.7322(3) 0.090(5) Uani 1 1 d . U . . .
 H17G H 0.504320 0.644171 0.720221 0.109 Uiso 1 1 calc R . . . .
 H17H H 0.547683 0.640825 0.745851 0.109 Uiso 1 1 calc R . . . .
 C35C C 1.0171(12) 0.4585(10) 0.7589(4) 0.100(5) Uani 1 1 d . U . . .
 C35A C 0.2436(9) 0.2499(10) 0.4887(4) 0.088(4) Uani 1 1 d . U . . .
 C3A C 0.2426(14) 0.4362(14) 0.5985(4) 0.125(6) Uani 1 1 d D U . . .
 C25D C 0.5716(9) 0.4552(8) 0.8150(3) 0.065(3) Uani 1 1 d . U . . .
 H25D H 0.605881 0.484542 0.804648 0.078 Uiso 1 1 calc R . . . .
 C15C C 0.6220(12) 0.6767(10) 0.6924(3) 0.092(5) Uani 1 1 d . U . . .
 H15C H 0.670802 0.695291 0.686147 0.110 Uiso 1 1 calc R . . . .
 C7D C 0.8638(10) 0.1318(9) 0.7346(3) 0.079(4) Uani 1 1 d . U . . .
 H7DA H 0.819627 0.147055 0.744139 0.094 Uiso 1 1 calc R . . . .
 H7DB H 0.882578 0.087047 0.741680 0.094 Uiso 1 1 calc R . . . .
 C26D C 0.5179(10) 0.5072(10) 0.8286(3) 0.081(4) Uani 1 1 d . U . . .
 H26D H 0.550779 0.540953 0.837688 0.097 Uiso 1 1 calc R . . . .
 C29C C 0.9437(16) 0.5630(11) 0.8344(4) 0.125(6) Uani 1 1 d . U . . .
 H29C H 0.969105 0.609583 0.836979 0.150 Uiso 1 1 calc R . . . .
 C20C C 0.6829(13) 0.7095(10) 0.7625(3) 0.095(5) Uani 1 1 d . U . . .
 H20C H 0.629744 0.706981 0.768132 0.114 Uiso 1 1 calc R . . . .
 C10A C 0.1883(9) 0.6999(11) 0.5797(3) 0.087(5) Uani 1 1 d . U . . .
 H10C H 0.221870 0.680700 0.566946 0.104 Uiso 1 1 calc R . . . .
 H10D H 0.158892 0.738271 0.572002 0.104 Uiso 1 1 calc R . . . .
 C11B C 0.4687(12) 0.1958(8) 0.4982(3) 0.078(5) Uani 1 1 d . U . . .
 H11A H 0.510642 0.171554 0.490260 0.117 Uiso 1 1 calc R . . . .
 H11B H 0.425141 0.164306 0.498568 0.117 Uiso 1 1 calc R . . . .
 H11C H 0.482639 0.208802 0.514905 0.117 Uiso 1 1 calc R . . . .
 C12C C 0.5652(13) 0.6422(11) 0.6544(3) 0.102(6) Uani 1 1 d . U . . .
 H12G H 0.516595 0.631961 0.646470 0.122 Uiso 1 1 calc R . . . .
 H12H H 0.601343 0.657473 0.641700 0.122 Uiso 1 1 calc R . . . .
 C12D C 0.9797(10) 0.1457(8) 0.7782(3) 0.080(4) Uani 1 1 d . U . . .
 H12E H 0.958745 0.100420 0.772201 0.096 Uiso 1 1 calc R . . . .
 H12F H 1.034920 0.142184 0.778470 0.096 Uiso 1 1 calc R . . . .
 C25C C 0.8034(13) 0.6154(11) 0.8150(3) 0.094(5) Uani 1 1 d . U . . .
 H25C H 0.780699 0.567424 0.812950 0.112 Uiso 1 1 calc R . . . .
 C22C C 0.7289(11) 0.6540(9) 0.7774(3) 0.082(4) Uani 1 1 d . U . . .
 H22C H 0.778308 0.649922 0.768871 0.098 Uiso 1 1 calc R . . . .
 C15D C 0.8757(11) 0.1909(8) 0.7978(3) 0.077(4) Uani 1 1 d . U . . .
 H15D H 0.841553 0.150822 0.793421 0.092 Uiso 1 1 calc R . . . .
 C32C C 0.8906(11) 0.4862(9) 0.7990(3) 0.088(5) Uani 1 1 d . U . . .
 H32G H 0.927823 0.450778 0.804430 0.105 Uiso 1 1 calc R . . . .
 H32H H 0.842635 0.475051 0.807143 0.105 Uiso 1 1 calc R . . . .
 C6D C 0.8400(11) 0.1190(10) 0.7070(3) 0.085(4) Uani 1 1 d . U . . .
 H6DA H 0.799423 0.083367 0.706292 0.102 Uiso 1 1 calc R . . . .
 H6DB H 0.883219 0.100387 0.697627 0.102 Uiso 1 1 calc R . . . .
 C31C C 0.9181(13) 0.5643(10) 0.8079(4) 0.101(5) Uani 1 1 d . U . . .
 H31C H 0.964767 0.573577 0.798351 0.121 Uiso 1 1 calc R . . . .
 C14D C 0.9546(12) 0.0970(9) 0.8204(3) 0.096(6) Uani 1 1 d . U . . .
 H14G H 0.956930 0.112468 0.837477 0.144 Uiso 1 1 calc R . . . .
 H14H H 0.999685 0.069686 0.816433 0.144 Uiso 1 1 calc R . . . .
 H14I H 0.910323 0.067238 0.817976 0.144 Uiso 1 1 calc R . . . .
 C23C C 0.7472(12) 0.6686(11) 0.8045(3) 0.093(5) Uani 1 1 d . U . . .
 H23C H 0.773118 0.715488 0.804770 0.112 Uiso 1 1 calc R . . . .
 C18B C 0.4004(11) 0.3609(11) 0.3925(3) 0.096(6) Uani 1 1 d . U . . .
 H18A H 0.367854 0.391855 0.382856 0.144 Uiso 1 1 calc R . . . .
 H18B H 0.380853 0.312466 0.392122 0.144 Uiso 1 1 calc R . . . .
 H18C H 0.451037 0.361648 0.385698 0.144 Uiso 1 1 calc R . . . .
 C27D C 0.4670(11) 0.4734(11) 0.8476(3) 0.095(6) Uani 1 1 d . U . . .
 H27G H 0.449789 0.427343 0.841598 0.143 Uiso 1 1 calc R . . . .
 H27H H 0.423799 0.504222 0.850461 0.143 Uiso 1 1 calc R . . . .
 H27I H 0.494699 0.467039 0.862883 0.143 Uiso 1 1 calc R . . . .
 C10B C 0.4498(8) 0.2606(8) 0.4842(3) 0.062(3) Uani 1 1 d . U . . .
 H10A H 0.406293 0.283359 0.492169 0.075 Uiso 1 1 calc R . . . .
 H10B H 0.433680 0.246065 0.467586 0.075 Uiso 1 1 calc R . . . .
 C2D C 0.7890(13) 0.1836(13) 0.6687(3) 0.107(3) Uani 1 1 d . U . . .
 H2DA H 0.766390 0.228833 0.663333 0.128 Uiso 1 1 calc R . . . .
 H2DB H 0.834594 0.175999 0.658702 0.128 Uiso 1 1 calc R . . . .
 C21D C 0.6513(11) 0.2460(12) 0.8412(4) 0.114(7) Uani 1 1 d . U . . .
 H21G H 0.636321 0.264896 0.857114 0.171 Uiso 1 1 calc R . . . .
 H21H H 0.674530 0.199436 0.843371 0.171 Uiso 1 1 calc R . . . .
 H21I H 0.607137 0.241346 0.830663 0.171 Uiso 1 1 calc R . . . .
 C12A C 0.0623(8) 0.6641(11) 0.6010(3) 0.080(5) Uani 1 1 d . U . . .
 H12C H 0.073460 0.706485 0.610946 0.096 Uiso 1 1 calc R . . . .
 H12D H 0.044010 0.625919 0.611854 0.096 Uiso 1 1 calc R . . . .
 C10D C 1.0118(10) 0.2742(11) 0.7614(4) 0.101(5) Uani 1 1 d . U . . .
 H10E H 0.985355 0.317116 0.755632 0.121 Uiso 1 1 calc R . . . .
 H10F H 1.027508 0.283127 0.778509 0.121 Uiso 1 1 calc R . . . .
 C7A C 0.1288(11) 0.5145(12) 0.6070(3) 0.100(5) Uani 1 1 d . U . . .
 H7AA H 0.099579 0.497344 0.592822 0.120 Uiso 1 1 calc R . . . .
 H7AB H 0.092969 0.528872 0.619906 0.120 Uiso 1 1 calc R . . . .
 C5C C 0.7272(11) 0.5923(12) 0.6507(3) 0.089(5) Uani 1 1 d . U . . .
 H5CA H 0.743150 0.611012 0.666766 0.107 Uiso 1 1 calc R . . . .
 H5CB H 0.712274 0.632930 0.640342 0.107 Uiso 1 1 calc R . . . .
 C7C C 0.7133(13) 0.4029(12) 0.6332(4) 0.127(9) Uani 1 1 d . U . . .
 H7CA H 0.708051 0.352142 0.636363 0.190 Uiso 1 1 calc R . . . .
 H7CB H 0.747024 0.410128 0.619250 0.190 Uiso 1 1 calc R . . . .
 H7CC H 0.664157 0.423132 0.629375 0.190 Uiso 1 1 calc R . . . .
 C10C C 0.5296(12) 0.5268(13) 0.6746(3) 0.111(6) Uani 1 1 d . U . . .
 H10G H 0.489692 0.553346 0.683171 0.133 Uiso 1 1 calc R . . . .
 H10H H 0.547834 0.489100 0.685696 0.133 Uiso 1 1 calc R . . . .
 C14B C 0.6270(11) 0.3311(10) 0.4219(3) 0.088(5) Uani 1 1 d . U . . .
 H14A H 0.610403 0.353011 0.406610 0.132 Uiso 1 1 calc R . . . .
 H14B H 0.646807 0.283769 0.418544 0.132 Uiso 1 1 calc R . . . .
 H14C H 0.666163 0.360291 0.429374 0.132 Uiso 1 1 calc R . . . .
 C18D C 0.9262(12) 0.3057(10) 0.8489(3) 0.097(6) Uani 1 1 d . U . . .
 H18G H 0.890355 0.303552 0.862484 0.146 Uiso 1 1 calc R . . . .
 H18H H 0.957738 0.347764 0.850740 0.146 Uiso 1 1 calc R . . . .
 H18I H 0.957639 0.263202 0.849128 0.146 Uiso 1 1 calc R . . . .
 C30A C 0.1790(10) 0.2745(9) 0.4061(3) 0.089(5) Uani 1 1 d . U . . .
 H30D H 0.216876 0.300552 0.396803 0.133 Uiso 1 1 calc R . . . .
 H30E H 0.152721 0.241653 0.395260 0.133 Uiso 1 1 calc R . . . .
 H30F H 0.203415 0.247856 0.419293 0.133 Uiso 1 1 calc R . . . .
 C4C C 0.7930(12) 0.5541(12) 0.6387(3) 0.099(5) Uani 1 1 d . U . . .
 H4CA H 0.779604 0.542608 0.621551 0.119 Uiso 1 1 calc R . . . .
 H4CB H 0.836531 0.586501 0.638256 0.119 Uiso 1 1 calc R . . . .
 C4A C 0.2837(12) 0.4992(14) 0.5919(4) 0.113(5) Uani 1 1 d . U . . .
 H4A H 0.318234 0.485707 0.578317 0.136 Uiso 1 1 calc R . . . .
 C18C C 0.4842(13) 0.7335(11) 0.7420(5) 0.128(8) Uani 1 1 d . U . . .
 H18J H 0.516323 0.771029 0.748540 0.192 Uiso 1 1 calc R . . . .
 H18K H 0.451622 0.715611 0.755052 0.192 Uiso 1 1 calc R . . . .
 H18L H 0.453457 0.752494 0.728707 0.192 Uiso 1 1 calc R . . . .
 C5D C 0.9442(12) 0.2355(13) 0.6817(4) 0.128(8) Uani 1 1 d . U . . .
 H5DA H 0.966252 0.189200 0.685455 0.192 Uiso 1 1 calc R . . . .
 H5DB H 0.980802 0.272761 0.685245 0.192 Uiso 1 1 calc R . . . .
 H5DC H 0.930255 0.237282 0.664426 0.192 Uiso 1 1 calc R . . . .
 C26C C 0.8132(19) 0.6268(12) 0.8420(3) 0.136(7) Uani 1 1 d . U . . .
 H26C H 0.763322 0.622125 0.850168 0.163 Uiso 1 1 calc R . . . .
 C11A C 0.2357(10) 0.7326(16) 0.5983(4) 0.139(11) Uani 1 1 d . U . . .
 H11D H 0.204221 0.752470 0.611288 0.208 Uiso 1 1 calc R . . . .
 H11E H 0.265337 0.770468 0.590821 0.208 Uiso 1 1 calc R . . . .
 H11F H 0.269211 0.696893 0.605263 0.208 Uiso 1 1 calc R . . . .
 C27C C 0.850(2) 0.7041(14) 0.8496(4) 0.171(14) Uani 1 1 d . U . . .
 H27J H 0.892008 0.714697 0.838648 0.256 Uiso 1 1 calc R . . . .
 H27K H 0.867904 0.702177 0.866507 0.256 Uiso 1 1 calc R . . . .
 H27L H 0.811967 0.741156 0.848044 0.256 Uiso 1 1 calc R . . . .
 C21C C 0.7075(12) 0.7905(10) 0.7623(4) 0.111(6) Uani 1 1 d . U . . .
 H21J H 0.695965 0.811886 0.778203 0.166 Uiso 1 1 calc R . . . .
 H21K H 0.680315 0.815608 0.749408 0.166 Uiso 1 1 calc R . . . .
 H21L H 0.761416 0.793755 0.759238 0.166 Uiso 1 1 calc R . . . .
 C6A C 0.1786(12) 0.4525(14) 0.6169(4) 0.118(6) Uani 1 1 d . U . . .
 H6AA H 0.200202 0.465894 0.632968 0.141 Uiso 1 1 calc R . . . .
 H6AB H 0.147487 0.409701 0.619316 0.141 Uiso 1 1 calc R . . . .
 C30D C 0.3793(11) 0.5449(11) 0.7740(3) 0.101(6) Uani 1 1 d . U . . .
 H30G H 0.412706 0.577611 0.765412 0.152 Uiso 1 1 calc R . . . .
 H30H H 0.340895 0.571844 0.782779 0.152 Uiso 1 1 calc R . . . .
 H30I H 0.355198 0.513412 0.762111 0.152 Uiso 1 1 calc R . . . .
 C28C C 0.8647(18) 0.5677(13) 0.8514(4) 0.139(7) Uani 1 1 d . U . . .
 H28G H 0.837969 0.521869 0.850575 0.167 Uiso 1 1 calc R . . . .
 H28H H 0.877895 0.576916 0.868657 0.167 Uiso 1 1 calc R . . . .
 C2A C 0.3022(13) 0.3837(12) 0.6093(3) 0.107(3) Uani 1 1 d D U . . .
 H2AA H 0.341466 0.374656 0.596870 0.128 Uiso 1 1 calc R . . . .
 H2AB H 0.326266 0.405155 0.623788 0.128 Uiso 1 1 calc R . . . .
 C1C C 0.9465(14) 0.4677(18) 0.6355(4) 0.165(12) Uani 1 1 d . U . . .
 H1CA H 0.943276 0.500536 0.621661 0.248 Uiso 1 1 calc R . . . .
 H1CB H 0.984553 0.431681 0.632069 0.248 Uiso 1 1 calc R . . . .
 H1CC H 0.960138 0.493750 0.650315 0.248 Uiso 1 1 calc R . . . .
 C14C C 0.5673(11) 0.7795(10) 0.6656(3) 0.095(5) Uani 1 1 d . U . . .
 H14J H 0.558317 0.813235 0.678909 0.142 Uiso 1 1 calc R . . . .
 H14K H 0.532066 0.788583 0.652250 0.142 Uiso 1 1 calc R . . . .
 H14L H 0.618626 0.784927 0.659613 0.142 Uiso 1 1 calc R . . . .
 C5A C 0.3368(14) 0.5342(17) 0.6142(4) 0.163(10) Uani 1 1 d . U . . .
 H5AA H 0.317838 0.518832 0.630184 0.245 Uiso 1 1 calc R . . . .
 H5AB H 0.335089 0.585909 0.613226 0.245 Uiso 1 1 calc R . . . .
 H5AC H 0.388629 0.518091 0.612266 0.245 Uiso 1 1 calc R . . . .
 C11D C 1.0838(13) 0.2646(12) 0.7455(6) 0.166(12) Uani 1 1 d . U . . .
 H11G H 1.123280 0.243020 0.755468 0.249 Uiso 1 1 calc R . . . .
 H11H H 1.100595 0.310809 0.739566 0.249 Uiso 1 1 calc R . . . .
 H11I H 1.072528 0.233792 0.731564 0.249 Uiso 1 1 calc R . . . .
 C30C C 1.0009(16) 0.5089(12) 0.8413(4) 0.142(8) Uani 1 1 d . U . . .
 H30J H 0.979171 0.461515 0.839763 0.213 Uiso 1 1 calc R . . . .
 H30K H 1.016701 0.516745 0.858254 0.213 Uiso 1 1 calc R . . . .
 H30L H 1.044194 0.513077 0.830423 0.213 Uiso 1 1 calc R . . . .
 C38B C 0.4345(13) 0.6675(14) 0.5760(4) 0.119(7) Uani 1 1 d . U . . .
 H38B H 0.451718 0.620635 0.578623 0.143 Uiso 1 1 calc R . . . .
 C2C C 0.8729(12) 0.4328(13) 0.6391(3) 0.107(3) Uani 1 1 d . U . . .
 H2CA H 0.879003 0.390917 0.649821 0.128 Uiso 1 1 calc R . . . .
 H2CB H 0.853056 0.416614 0.623172 0.128 Uiso 1 1 calc R . . . .
 C24C C 0.6790(13) 0.6771(15) 0.8204(4) 0.136(9) Uani 1 1 d . U . . .
 H24J H 0.653884 0.631295 0.822173 0.204 Uiso 1 1 calc GR . . . .
 H24K H 0.644693 0.711114 0.812861 0.204 Uiso 1 1 calc GR . . . .
 H24L H 0.694160 0.694430 0.836570 0.204 Uiso 1 1 calc GR . . . .
 C38D C 0.5718(17) 0.2905(14) 0.6714(4) 0.139(4) Uani 1 1 d . U . . .
 H38D H 0.622112 0.278413 0.667786 0.167 Uiso 1 1 calc R . . . .
 C1D C 0.7349(16) 0.1251(18) 0.6631(4) 0.159(11) Uani 1 1 d . U . . .
 H1DA H 0.751862 0.081343 0.670992 0.239 Uiso 1 1 calc R . . . .
 H1DB H 0.732166 0.117949 0.645391 0.239 Uiso 1 1 calc R . . . .
 H1DC H 0.685293 0.137776 0.669372 0.239 Uiso 1 1 calc R . . . .
 C11C C 0.4969(14) 0.4923(19) 0.6504(4) 0.162(12) Uani 1 1 d . U . . .
 H11J H 0.475261 0.529387 0.640086 0.242 Uiso 1 1 calc R . . . .
 H11K H 0.458000 0.457938 0.654755 0.242 Uiso 1 1 calc R . . . .
 H11L H 0.537119 0.468309 0.641534 0.242 Uiso 1 1 calc R . . . .
 C1A C 0.2665(16) 0.3167(16) 0.6162(5) 0.172(11) Uani 1 1 d D U . . .
 H1AA H 0.253028 0.318152 0.633535 0.258 Uiso 1 1 calc R . . . .
 H1AB H 0.301387 0.277599 0.613276 0.258 Uiso 1 1 calc R . . . .
 H1AC H 0.221344 0.309736 0.606310 0.258 Uiso 1 1 calc R . . . .
 C38C C 1.0257(17) 0.4128(14) 0.6970(5) 0.139(4) Uani 1 1 d . U . . .
 H38C H 0.990569 0.408576 0.684086 0.167 Uiso 1 1 calc R . . . .
 C38A C 0.3076(16) 0.2365(14) 0.5469(4) 0.139(4) Uani 1 1 d . U . . .
 H38A H 0.316726 0.265051 0.560873 0.167 Uiso 1 1 calc R . . . .

loop_
  _atom_site_aniso_label
  _atom_site_aniso_U_11
  _atom_site_aniso_U_22
  _atom_site_aniso_U_33
  _atom_site_aniso_U_23
  _atom_site_aniso_U_13
  _atom_site_aniso_U_12
 Br1B 0.0605(9) 0.1208(14) 0.0490(10) -0.0038(9) -0.0010(7) -0.0106(10)
 Br1A 0.0928(14) 0.1218(17) 0.147(2) 0.0491(15) -0.0094(13) 0.0297(14)
 Br1D 0.157(2) 0.165(2) 0.0679(13) -0.0508(14) -0.0003(13) -0.0218(19)
 Br1C 0.200(3) 0.1043(17) 0.204(3) 0.0373(19) 0.095(3) 0.034(2)
 O4B 0.083(6) 0.059(6) 0.047(6) -0.003(4) -0.023(5) 0.007(5)
 O3B 0.063(5) 0.054(5) 0.037(5) 0.000(4) 0.008(4) 0.011(4)
 O2B 0.063(5) 0.047(5) 0.049(5) -0.007(4) -0.001(4) -0.006(5)
 O1B 0.072(6) 0.045(5) 0.041(5) 0.000(4) -0.014(4) 0.003(5)
 O7B 0.066(6) 0.047(5) 0.044(5) 0.009(4) -0.008(4) 0.006(5)
 O5A 0.052(5) 0.053(5) 0.046(6) -0.013(4) 0.011(4) -0.003(4)
 O5B 0.062(6) 0.062(5) 0.043(6) 0.021(4) 0.008(4) 0.001(5)
 O6B 0.051(5) 0.052(5) 0.044(5) 0.008(4) -0.006(4) -0.006(4)
 O4A 0.099(7) 0.071(6) 0.032(5) -0.004(4) 0.012(5) 0.039(6)
 O6A 0.073(6) 0.060(5) 0.048(6) -0.004(4) 0.020(5) -0.016(5)
 O7D 0.078(6) 0.086(7) 0.047(6) 0.010(5) -0.010(5) -0.011(6)
 O2C 0.082(6) 0.082(6) 0.055(6) -0.001(5) 0.003(5) 0.014(6)
 O4D 0.076(6) 0.067(6) 0.086(7) 0.007(6) -0.010(5) -0.013(6)
 O9B 0.084(7) 0.073(6) 0.049(6) -0.007(5) 0.015(5) 0.005(6)
 O9D 0.074(6) 0.116(9) 0.043(6) 0.023(6) 0.010(5) 0.033(7)
 O7A 0.084(7) 0.050(5) 0.062(6) -0.015(4) -0.004(5) 0.000(5)
 O3D 0.084(6) 0.079(7) 0.064(6) 0.014(5) -0.002(5) 0.015(6)
 O10A 0.084(7) 0.087(7) 0.051(6) 0.020(5) -0.008(6) 0.023(7)
 O3A 0.059(5) 0.116(8) 0.039(5) -0.012(5) 0.009(4) 0.003(6)
 O5D 0.058(5) 0.075(6) 0.066(7) 0.006(5) -0.003(5) -0.017(5)
 O8B 0.070(6) 0.079(6) 0.056(6) 0.010(5) 0.019(5) 0.030(6)
 O6D 0.066(6) 0.092(7) 0.043(6) -0.016(4) 0.010(4) -0.011(5)
 O1C 0.077(6) 0.113(8) 0.043(6) -0.002(5) 0.004(5) 0.007(7)
 O7C 0.083(6) 0.120(9) 0.048(6) 0.038(6) -0.011(5) -0.025(7)
 O1D 0.078(7) 0.090(8) 0.069(7) 0.009(6) 0.014(5) 0.015(6)
 O2D 0.076(7) 0.080(6) 0.079(6) 0.022(6) 0.014(5) 0.019(6)
 O2A 0.053(6) 0.153(10) 0.052(6) 0.020(6) 0.006(5) 0.025(6)
 O10D 0.113(7) 0.096(8) 0.064(7) 0.003(5) -0.013(6) 0.003(7)
 O10C 0.076(6) 0.091(7) 0.052(6) 0.010(5) -0.005(5) -0.003(6)
 O6C 0.122(9) 0.099(8) 0.060(7) 0.022(6) -0.015(6) -0.052(7)
 O8D 0.065(6) 0.095(8) 0.072(7) 0.011(6) 0.002(5) -0.008(6)
 O3C 0.089(7) 0.092(6) 0.039(5) 0.009(5) 0.017(5) 0.037(6)
 O10B 0.084(7) 0.120(8) 0.071(7) -0.018(6) -0.012(5) -0.008(7)
 O5C 0.117(9) 0.096(7) 0.073(7) -0.015(6) 0.010(7) -0.027(7)
 O4C 0.084(7) 0.087(8) 0.069(7) 0.020(6) 0.008(6) 0.026(6)
 C23A 0.073(8) 0.057(7) 0.042(7) -0.006(6) 0.011(6) -0.019(7)
 C25A 0.090(10) 0.061(7) 0.037(7) -0.005(6) 0.005(6) -0.009(7)
 C8B 0.047(6) 0.052(7) 0.046(7) -0.001(6) -0.003(5) 0.003(5)
 C34B 0.043(7) 0.054(6) 0.061(8) 0.001(5) -0.004(6) 0.003(6)
 C19A 0.043(7) 0.065(7) 0.049(7) -0.004(5) 0.007(6) 0.018(6)
 C20B 0.067(8) 0.058(8) 0.034(7) 0.006(6) 0.001(5) -0.005(6)
 O8C 0.123(11) 0.103(10) 0.156(12) 0.024(9) -0.065(9) -0.013(9)
 C33B 0.052(7) 0.054(7) 0.052(8) -0.001(5) 0.008(6) -0.002(6)
 C19B 0.050(7) 0.062(7) 0.033(7) 0.012(5) 0.000(5) -0.002(6)
 C23B 0.053(7) 0.052(7) 0.036(7) 0.013(5) -0.002(5) -0.010(5)
 C29B 0.056(7) 0.052(7) 0.058(8) 0.010(5) -0.011(6) 0.000(6)
 C16B 0.042(6) 0.072(7) 0.027(7) -0.007(5) 0.006(5) 0.005(6)
 C7B 0.060(8) 0.055(7) 0.045(7) -0.007(6) 0.012(6) -0.002(6)
 C35B 0.072(9) 0.070(7) 0.052(8) -0.018(6) 0.003(6) -0.008(7)
 C15A 0.056(6) 0.071(8) 0.039(6) -0.001(5) 0.003(6) 0.016(7)
 C20A 0.056(7) 0.060(8) 0.050(7) -0.004(6) 0.005(6) 0.014(6)
 C26A 0.085(8) 0.061(8) 0.042(7) -0.001(6) 0.015(7) -0.023(7)
 C16A 0.053(7) 0.050(6) 0.047(7) 0.008(5) -0.001(6) 0.000(6)
 C31B 0.054(7) 0.065(8) 0.045(7) 0.006(5) -0.009(5) 0.001(6)
 C24A 0.099(12) 0.078(9) 0.045(9) 0.012(7) -0.030(8) -0.019(9)
 O1A 0.107(10) 0.145(11) 0.091(9) 0.043(8) -0.022(7) 0.023(9)
 C26B 0.062(8) 0.062(8) 0.040(7) 0.011(5) -0.006(6) -0.010(6)
 C33D 0.067(7) 0.063(8) 0.032(7) 0.009(6) -0.001(5) -0.002(7)
 C28B 0.042(7) 0.080(9) 0.075(9) 0.000(7) -0.004(6) 0.001(7)
 C2B 0.119(7) 0.141(7) 0.060(5) -0.022(5) -0.017(5) 0.005(5)
 C17A 0.065(8) 0.063(7) 0.032(7) 0.003(6) 0.006(6) 0.001(7)
 C22A 0.066(7) 0.037(6) 0.048(6) -0.004(6) 0.007(6) -0.003(6)
 C9A 0.064(7) 0.139(11) 0.030(8) -0.021(7) 0.025(6) -0.008(7)
 C25B 0.053(7) 0.068(8) 0.041(8) -0.002(5) -0.011(5) -0.001(6)
 C34D 0.070(7) 0.061(8) 0.044(8) 0.001(6) -0.008(6) 0.004(7)
 C22B 0.061(7) 0.043(7) 0.037(7) 0.006(5) -0.006(5) -0.006(5)
 C6B 0.064(7) 0.066(9) 0.053(8) -0.010(7) -0.012(6) 0.004(7)
 C36B 0.044(7) 0.069(6) 0.039(7) 0.005(5) 0.017(5) 0.012(6)
 C37B 0.056(8) 0.134(10) 0.017(7) 0.002(7) 0.007(5) -0.001(8)
 C17B 0.047(7) 0.067(8) 0.039(7) 0.013(6) 0.005(6) 0.004(6)
 C3B 0.069(7) 0.053(6) 0.025(6) 0.008(5) -0.009(5) 0.009(6)
 C13A 0.068(8) 0.102(11) 0.061(9) -0.038(8) -0.007(6) 0.014(8)
 C27B 0.057(8) 0.091(11) 0.049(9) 0.018(7) -0.001(7) -0.001(8)
 O8A 0.089(8) 0.062(7) 0.189(13) -0.030(8) -0.022(9) -0.023(7)
 C22D 0.078(9) 0.093(9) 0.039(9) 0.014(6) 0.009(7) -0.011(7)
 C4B 0.087(9) 0.051(7) 0.039(7) 0.000(5) 0.002(7) 0.007(6)
 C32B 0.057(8) 0.047(7) 0.055(8) 0.001(5) -0.008(6) -0.007(6)
 C33A 0.076(10) 0.055(7) 0.066(8) -0.018(6) 0.003(7) -0.021(8)
 C12B 0.082(9) 0.045(7) 0.050(7) 0.003(6) 0.008(6) 0.025(7)
 C37A 0.030(7) 0.090(9) 0.162(13) 0.039(8) 0.003(9) 0.023(8)
 C24B 0.063(8) 0.040(7) 0.057(9) 0.003(6) -0.025(7) -0.005(7)
 C3D 0.073(8) 0.095(10) 0.057(8) 0.003(7) 0.007(6) 0.025(7)
 C9B 0.050(7) 0.060(7) 0.045(6) -0.003(5) -0.014(5) 0.020(5)
 C31A 0.070(7) 0.052(7) 0.043(7) 0.001(6) 0.009(6) -0.015(6)
 C28A 0.126(12) 0.075(9) 0.056(9) -0.018(7) 0.053(10) -0.022(8)
 C5B 0.096(11) 0.050(8) 0.064(9) 0.012(6) 0.001(8) -0.010(8)
 C36A 0.054(9) 0.079(8) 0.090(10) 0.016(6) 0.020(8) 0.007(8)
 C3C 0.093(9) 0.144(12) 0.021(7) -0.016(7) 0.013(7) 0.015(8)
 C23D 0.075(9) 0.089(10) 0.047(9) 0.009(6) 0.014(6) -0.029(7)
 C21B 0.075(9) 0.078(10) 0.050(9) 0.022(7) 0.012(7) 0.002(8)
 C15B 0.054(7) 0.070(7) 0.029(7) -0.004(5) -0.006(5) 0.002(6)
 C8A 0.070(9) 0.142(11) 0.042(9) -0.021(8) 0.012(7) -0.010(7)
 C14A 0.066(8) 0.101(12) 0.047(9) -0.011(8) 0.007(7) -0.006(9)
 C35D 0.072(7) 0.112(13) 0.055(9) 0.000(8) -0.017(7) 0.007(8)
 C9C 0.079(9) 0.113(10) 0.053(9) 0.012(7) -0.011(7) 0.030(7)
 C34A 0.046(8) 0.048(6) 0.108(9) -0.002(6) 0.021(7) -0.007(7)
 C34C 0.094(8) 0.049(9) 0.090(9) 0.025(8) -0.019(6) -0.017(8)
 C16D 0.087(8) 0.074(9) 0.071(9) 0.003(7) -0.010(7) -0.026(7)
 C13C 0.104(12) 0.108(10) 0.063(10) 0.030(8) 0.006(9) 0.052(11)
 C31D 0.061(8) 0.062(8) 0.069(9) -0.017(6) 0.007(6) -0.010(6)
 C37D 0.113(9) 0.067(10) 0.058(9) -0.004(7) -0.013(8) 0.012(9)
 C1B 0.095(11) 0.088(10) 0.041(9) 0.008(7) -0.004(8) 0.017(8)
 C8D 0.076(9) 0.055(8) 0.090(9) -0.004(7) 0.007(7) 0.020(7)
 C16C 0.092(9) 0.068(9) 0.081(9) 0.006(8) 0.005(7) 0.025(9)
 C36D 0.076(7) 0.101(12) 0.039(8) 0.005(7) -0.001(6) 0.027(8)
 C30B 0.082(10) 0.068(9) 0.046(8) 0.010(6) -0.019(7) 0.000(8)
 C19C 0.106(10) 0.055(9) 0.087(9) 0.009(7) 0.000(8) 0.032(9)
 O9C 0.097(8) 0.103(10) 0.162(11) 0.013(9) -0.031(7) 0.005(8)
 C32D 0.073(9) 0.094(10) 0.050(9) -0.019(7) 0.006(7) -0.008(8)
 C36C 0.079(8) 0.064(10) 0.081(9) 0.011(8) -0.013(6) 0.001(8)
 C13D 0.104(11) 0.073(10) 0.093(10) 0.011(8) -0.036(9) 0.002(9)
 C29A 0.099(11) 0.069(8) 0.054(8) -0.025(6) 0.017(8) -0.019(8)
 C37C 0.073(8) 0.041(8) 0.111(9) 0.014(8) -0.011(7) 0.009(8)
 C32A 0.066(7) 0.080(10) 0.067(8) -0.037(8) 0.027(7) -0.019(8)
 C6C 0.085(9) 0.105(11) 0.059(10) -0.023(8) -0.021(7) 0.029(7)
 C19D 0.090(8) 0.061(9) 0.071(9) 0.019(7) -0.005(6) -0.028(7)
 C4D 0.079(9) 0.091(10) 0.076(9) 0.010(9) 0.025(7) 0.012(8)
 C17D 0.064(9) 0.061(8) 0.075(10) 0.029(7) -0.014(7) -0.008(7)
 C33C 0.094(8) 0.069(10) 0.078(9) 0.006(8) -0.025(7) -0.025(9)
 O9A 0.108(10) 0.094(8) 0.185(12) 0.042(8) -0.015(10) 0.007(9)
 C21A 0.063(7) 0.069(9) 0.059(9) -0.001(8) 0.001(7) 0.015(7)
 C13B 0.055(8) 0.088(9) 0.051(7) -0.006(7) -0.011(6) 0.028(8)
 C9D 0.065(8) 0.059(8) 0.099(9) 0.000(7) -0.011(6) 0.027(6)
 C27A 0.110(10) 0.054(9) 0.070(10) 0.008(8) -0.011(9) -0.033(9)
 C8C 0.085(8) 0.112(11) 0.021(7) 0.017(7) -0.005(7) 0.029(7)
 C18A 0.071(10) 0.080(11) 0.118(15) 0.038(10) 0.006(10) 0.003(9)
 C20D 0.081(10) 0.084(10) 0.070(10) 0.017(7) -0.011(7) -0.023(7)
 C28D 0.100(12) 0.124(12) 0.047(9) -0.041(7) 0.014(8) 0.030(10)
 C29D 0.083(10) 0.116(13) 0.069(11) -0.026(8) 0.016(7) 0.017(9)
 C24D 0.086(11) 0.121(14) 0.051(9) -0.003(8) 0.010(7) -0.026(11)
 C17C 0.088(10) 0.096(12) 0.087(12) 0.005(9) 0.015(9) 0.041(10)
 C35C 0.096(9) 0.077(12) 0.127(12) 0.020(11) -0.040(8) 0.000(11)
 C35A 0.051(9) 0.054(8) 0.159(12) 0.003(7) -0.002(9) 0.006(8)
 C3A 0.135(15) 0.159(15) 0.079(13) 0.027(12) -0.027(9) 0.008(10)
 C25D 0.082(9) 0.069(8) 0.043(8) -0.009(6) 0.011(6) -0.020(6)
 C15C 0.116(13) 0.094(8) 0.067(8) 0.016(8) 0.003(8) 0.049(10)
 C7D 0.089(10) 0.061(8) 0.085(10) 0.000(8) -0.018(9) 0.012(7)
 C26D 0.089(10) 0.104(11) 0.050(9) -0.024(7) 0.015(6) -0.017(8)
 C29C 0.205(18) 0.086(12) 0.086(12) 0.021(10) -0.074(11) -0.076(12)
 C20C 0.109(13) 0.093(9) 0.084(9) -0.005(8) 0.006(9) -0.005(10)
 C10A 0.057(9) 0.143(13) 0.060(10) -0.023(9) 0.013(7) -0.021(9)
 C11B 0.128(14) 0.057(8) 0.049(9) 0.000(6) -0.003(10) -0.004(9)
 C12C 0.121(14) 0.123(11) 0.061(10) 0.025(7) 0.004(9) 0.062(11)
 C12D 0.085(10) 0.063(9) 0.093(9) 0.006(7) -0.022(8) 0.007(8)
 C25C 0.150(12) 0.103(12) 0.028(8) 0.013(8) 0.008(8) -0.048(10)
 C22C 0.103(12) 0.084(9) 0.058(8) -0.008(8) 0.008(8) -0.021(8)
 C15D 0.101(10) 0.052(8) 0.077(10) 0.021(6) -0.018(7) 0.000(8)
 C32C 0.105(13) 0.080(9) 0.079(9) 0.025(8) -0.046(9) -0.037(10)
 C6D 0.090(11) 0.090(10) 0.076(10) 0.007(8) 0.002(8) 0.022(9)
 C31C 0.126(12) 0.097(10) 0.079(10) 0.020(9) -0.050(9) -0.062(9)
 C14D 0.117(14) 0.073(10) 0.098(13) 0.032(9) -0.023(11) 0.001(11)
 C23C 0.130(12) 0.093(12) 0.056(9) -0.016(8) 0.021(8) -0.037(9)
 C18B 0.104(13) 0.129(15) 0.053(9) -0.027(9) 0.000(9) -0.081(13)
 C27D 0.096(12) 0.117(14) 0.072(11) -0.037(9) 0.030(9) -0.046(12)
 C10B 0.067(8) 0.062(7) 0.058(9) -0.002(6) -0.014(7) 0.007(6)
 C2D 0.119(7) 0.141(7) 0.060(5) -0.022(5) -0.017(5) 0.005(5)
 C21D 0.102(12) 0.139(17) 0.101(14) 0.082(13) 0.010(11) -0.006(13)
 C12A 0.056(7) 0.141(15) 0.042(8) -0.007(9) 0.008(6) -0.006(8)
 C10D 0.072(9) 0.089(11) 0.141(16) 0.014(11) -0.012(9) -0.006(9)
 C7A 0.087(11) 0.168(14) 0.044(10) 0.019(11) 0.002(8) -0.027(9)
 C5C 0.088(9) 0.136(13) 0.042(10) 0.032(10) -0.003(8) 0.016(8)
 C7C 0.139(17) 0.130(16) 0.112(15) -0.079(13) -0.052(13) 0.064(14)
 C10C 0.100(12) 0.165(17) 0.067(11) 0.028(11) -0.006(9) -0.001(11)
 C14B 0.113(13) 0.091(12) 0.059(10) 0.008(9) 0.027(9) 0.020(11)
 C18D 0.123(15) 0.085(12) 0.083(11) 0.003(9) -0.031(10) -0.031(12)
 C30A 0.088(11) 0.085(10) 0.094(12) -0.047(9) 0.007(9) -0.024(9)
 C4C 0.109(12) 0.154(14) 0.035(9) 0.004(9) 0.020(8) 0.007(10)
 C4A 0.101(12) 0.156(14) 0.082(13) 0.016(11) -0.023(9) 0.030(9)
 C18C 0.121(16) 0.089(13) 0.17(2) 0.001(13) 0.040(15) 0.059(13)
 C5D 0.102(13) 0.134(17) 0.148(16) 0.059(15) 0.080(13) 0.044(13)
 C26C 0.24(2) 0.118(13) 0.051(9) -0.009(10) -0.016(11) -0.058(14)
 C11A 0.072(11) 0.26(3) 0.083(13) -0.068(17) 0.028(9) -0.059(15)
 C27C 0.31(4) 0.131(15) 0.074(14) -0.011(12) 0.023(19) -0.08(2)
 C21C 0.097(14) 0.094(10) 0.141(18) -0.040(11) -0.010(13) 0.006(11)
 C6A 0.104(12) 0.165(16) 0.084(12) 0.010(11) -0.040(9) -0.029(11)
 C30D 0.097(13) 0.130(15) 0.077(12) -0.043(10) -0.004(9) 0.032(11)
 C28C 0.24(2) 0.128(14) 0.050(11) 0.011(11) -0.058(11) -0.081(14)
 C2A 0.119(7) 0.141(7) 0.060(5) -0.022(5) -0.017(5) 0.005(5)
 C1C 0.122(14) 0.28(4) 0.089(16) 0.07(2) 0.020(13) -0.022(17)
 C14C 0.104(13) 0.106(10) 0.074(12) 0.024(9) 0.010(10) 0.039(11)
 C5A 0.136(19) 0.24(3) 0.112(17) 0.017(18) -0.079(15) 0.029(19)
 C11D 0.106(15) 0.084(14) 0.31(4) -0.057(19) 0.064(18) 0.002(13)
 C30C 0.23(2) 0.130(16) 0.072(13) 0.047(12) -0.081(14) -0.061(14)
 C38B 0.126(16) 0.148(16) 0.083(13) 0.005(11) -0.045(11) -0.001(14)
 C2C 0.119(7) 0.141(7) 0.060(5) -0.022(5) -0.017(5) 0.005(5)
 C24C 0.126(14) 0.19(2) 0.088(14) -0.066(15) 0.025(11) -0.043(15)
 C38D 0.164(11) 0.142(10) 0.112(8) -0.019(7) -0.010(7) 0.040(10)
 C1D 0.15(2) 0.22(3) 0.101(17) -0.010(18) -0.014(16) -0.057(19)
 C11C 0.103(16) 0.27(3) 0.112(17) -0.022(18) -0.024(13) -0.04(2)
 C1A 0.14(2) 0.21(2) 0.16(2) 0.07(2) -0.026(19) -0.021(18)
 C38C 0.164(11) 0.142(10) 0.112(8) -0.019(7) -0.010(7) 0.040(10)
 C38A 0.164(11) 0.142(10) 0.112(8) -0.019(7) -0.010(7) 0.040(10)

_geom_special_details
;
 All esds (except the esd in the dihedral angle between two l.s. planes)
 are estimated using the full covariance matrix.  The cell esds are taken
 into account individually in the estimation of esds in distances, angles
 and torsion angles; correlations between esds in cell parameters are only
 used when they are defined by crystal symmetry.  An approximate (isotropic)
 treatment of cell esds is used for estimating esds involving l.s. planes.
;
loop_
  _geom_bond_atom_site_label_1
  _geom_bond_atom_site_label_2
  _geom_bond_distance
  _geom_bond_site_symmetry_2
  _geom_bond_publ_flag
 Br1B C38B 1.96(2) . ?
 Br1A C38A 2.00(3) . ?
 Br1D C38D 1.90(3) . ?
 Br1C C38C 1.96(3) . ?
 O4B C19B 1.250(15) . ?
 O3B C9B 1.462(15) . ?
 O3B C15B 1.505(16) . ?
 O2B C8B 1.445(15) . ?
 O2B C4B 1.499(15) . ?
 O1B C3B 1.418(13) . ?
 O7B C33B 1.235(16) . ?
 O5A C22A 1.408(15) . ?
 O5B C22B 1.495(15) . ?
 O6B C31B 1.458(16) . ?
 O6B C25B 1.476(15) . ?
 O4A C19A 1.206(16) . ?
 O6A C25A 1.480(17) . ?
 O6A C31A 1.368(16) . ?
 O7D C33D 1.223(17) . ?
 O2C C6C 1.487(19) . ?
 O2C C8C 1.519(18) . ?
 O4D C19D 1.264(18) . ?
 O9B C35B 1.237(18) . ?
 O9D C36D 1.215(19) . ?
 O7A C33A 1.257(17) . ?
 O3D C9D 1.450(18) . ?
 O3D C15D 1.450(17) . ?
 O10A C36A 1.18(2) . ?
 O3A C15A 1.424(17) . ?
 O3A C9A 1.474(18) . ?
 O5D C22D 1.418(17) . ?
 O8B C36B 1.292(17) . ?
 O6D C31D 1.445(18) . ?
 O6D C25D 1.439(17) . ?
 O1C C3C 1.415(15) . ?
 O7C C33C 1.30(2) . ?
 O1D C3D 1.479(15) . ?
 O2D C8D 1.423(18) . ?
 O2D C4D 1.491(19) . ?
 O2A C8A 1.454(18) . ?
 O2A C4A 1.49(2) . ?
 O10D C35D 1.41(2) . ?
 O10D C37D 1.50(2) . ?
 O10C C36C 1.206(19) . ?
 O6C C25C 1.38(2) . ?
 O6C C31C 1.36(2) . ?
 O8D C35D 1.24(2) . ?
 O3C C9C 1.47(2) . ?
 O3C C15C 1.38(2) . ?
 O10B C35B 1.366(18) . ?
 O10B C37B 1.51(2) . ?
 O5C C22C 1.406(19) . ?
 O4C C19C 1.140(19) . ?
 C23A C25A 1.50(2) . ?
 C23A C24A 1.52(2) . ?
 C23A C22A 1.509(19) . ?
 C25A C26A 1.61(2) . ?
 C8B C7B 1.487(19) . ?
 C8B C9B 1.554(18) . ?
 C34B C33B 1.448(19) . ?
 C34B C35B 1.48(2) . ?
 C34B C36B 1.356(19) . ?
 C19A C20A 1.521(19) . ?
 C19A C16A 1.475(19) . ?
 C20B C19B 1.546(19) . ?
 C20B C22B 1.465(19) . ?
 C20B C21B 1.491(19) . ?
 O8C C35C 1.26(2) . ?
 C33B C32B 1.508(19) . ?
 C19B C16B 1.459(19) . ?
 C23B C25B 1.558(19) . ?
 C23B C22B 1.457(18) . ?
 C23B C24B 1.570(18) . ?
 C29B C31B 1.548(18) . ?
 C29B C28B 1.470(19) . ?
 C29B C30B 1.56(2) . ?
 C16B C17B 1.487(18) . ?
 C16B C15B 1.535(18) . ?
 C7B C6B 1.548(19) . ?
 C15A C16A 1.513(18) . ?
 C15A C13A 1.51(2) . ?
 C20A C22A 1.574(18) . ?
 C20A C21A 1.55(2) . ?
 C26A C28A 1.57(2) . ?
 C26A C27A 1.48(2) . ?
 C16A C17A 1.546(18) . ?
 C31B C32B 1.511(19) . ?
 O1A C3A 1.46(2) . ?
 C26B C28B 1.63(2) . ?
 C26B C25B 1.492(19) . ?
 C26B C27B 1.533(19) . ?
 C33D C34D 1.50(2) . ?
 C33D C32D 1.48(2) . ?
 C2B C3B 1.50(2) . ?
 C2B C1B 1.55(3) . ?
 C17A C18A 1.52(2) . ?
 C9A C8A 1.55(3) . ?
 C9A C10A 1.53(2) . ?
 C9A C12A 1.51(2) . ?
 C34D C35D 1.42(2) . ?
 C34D C36D 1.41(2) . ?
 C6B C3B 1.54(2) . ?
 C36B C37B 1.37(2) . ?
 C37B C38B 1.18(2) . ?
 C17B C18B 1.595(19) . ?
 C3B C4B 1.51(2) . ?
 C13A C14A 1.56(2) . ?
 C13A C12A 1.53(2) . ?
 O8A C35A 1.24(2) . ?
 C22D C23D 1.48(2) . ?
 C22D C20D 1.54(2) . ?
 C4B C5B 1.522(19) . ?
 C33A C34A 1.52(2) . ?
 C33A C32A 1.39(2) . ?
 C12B C9B 1.474(19) . ?
 C12B C13B 1.513(19) . ?
 C37A C36A 1.37(2) . ?
 C37A O9A 1.48(3) . ?
 C37A C38A 1.23(3) . ?
 C3D C4D 1.48(2) . ?
 C3D C6D 1.56(2) . ?
 C3D C2D 1.47(2) . ?
 C9B C10B 1.53(2) . ?
 C31A C29A 1.473(19) . ?
 C31A C32A 1.57(2) . ?
 C28A C29A 1.54(2) . ?
 C36A C34A 1.45(2) . ?
 C3C C6C 1.55(3) . ?
 C3C C4C 1.46(3) . ?
 C3C C2C 1.58(3) . ?
 C23D C24D 1.53(2) . ?
 C23D C25D 1.48(2) . ?
 C15B C13B 1.48(2) . ?
 C8A C7A 1.42(3) . ?
 C9C C8C 1.57(2) . ?
 C9C C12C 1.50(2) . ?
 C9C C10C 1.51(3) . ?
 C34A C35A 1.48(2) . ?
 C34C C36C 1.44(2) . ?
 C34C C33C 1.41(3) . ?
 C34C C35C 1.41(3) . ?
 C16D C19D 1.45(2) . ?
 C16D C17D 1.56(2) . ?
 C16D C15D 1.55(2) . ?
 C13C C15C 1.55(2) . ?
 C13C C12C 1.59(3) . ?
 C13C C14C 1.53(3) . ?
 C31D C32D 1.53(2) . ?
 C31D C29D 1.55(2) . ?
 C37D C36D 1.41(2) . ?
 C37D C38D 1.22(3) . ?
 C8D C9D 1.50(2) . ?
 C8D C7D 1.50(2) . ?
 C16C C19C 1.60(3) . ?
 C16C C17C 1.60(2) . ?
 C16C C15C 1.52(2) . ?
 C19C C20C 1.57(3) . ?
 O9C C37C 1.39(2) . ?
 O9C C35C 1.43(3) . ?
 C36C C37C 1.45(2) . ?
 C13D C12D 1.48(2) . ?
 C13D C15D 1.43(3) . ?
 C13D C14D 1.52(2) . ?
 C29A C30A 1.54(2) . ?
 C37C C38C 1.24(3) . ?
 C6C C7C 1.44(2) . ?
 C19D C20D 1.55(2) . ?
 C4D C5D 1.57(2) . ?
 C17D C18D 1.57(2) . ?
 C33C C32C 1.48(2) . ?
 O9A C35A 1.35(2) . ?
 C13B C14B 1.53(2) . ?
 C9D C12D 1.56(2) . ?
 C9D C10D 1.57(2) . ?
 C8C C5C 1.34(2) . ?
 C20D C21D 1.57(2) . ?
 C28D C29D 1.57(3) . ?
 C28D C26D 1.58(3) . ?
 C29D C30D 1.52(3) . ?
 C17C C18C 1.52(2) . ?
 C3A C4A 1.42(3) . ?
 C3A C6A 1.52(3) . ?
 C3A C2A 1.54(3) . ?
 C25D C26D 1.53(2) . ?
 C7D C6D 1.55(2) . ?
 C26D C27D 1.49(2) . ?
 C29C C31C 1.49(3) . ?
 C29C C28C 1.66(4) . ?
 C29C C30C 1.46(3) . ?
 C20C C22C 1.53(3) . ?
 C20C C21C 1.56(3) . ?
 C10A C11A 1.43(2) . ?
 C11B C10B 1.45(2) . ?
 C25C C23C 1.50(3) . ?
 C25C C26C 1.47(2) . ?
 C22C C23C 1.51(2) . ?
 C32C C31C 1.60(2) . ?
 C23C C24C 1.48(3) . ?
 C2D C1D 1.47(3) . ?
 C10D C11D 1.53(3) . ?
 C7A C6A 1.54(3) . ?
 C5C C4C 1.50(3) . ?
 C10C C11C 1.55(3) . ?
 C4A C5A 1.65(3) . ?
 C26C C27C 1.62(3) . ?
 C26C C28C 1.50(4) . ?
 C2A C1A 1.44(2) . ?
 C1C C2C 1.45(3) . ?

loop_
  _geom_angle_atom_site_label_1
  _geom_angle_atom_site_label_2
  _geom_angle_atom_site_label_3
  _geom_angle
  _geom_angle_site_symmetry_1
  _geom_angle_site_symmetry_3
  _geom_angle_publ_flag
 C9B O3B C15B 106.4(9) . . ?
 C8B O2B C4B 112.8(10) . . ?
 C31B O6B C25B 114.6(9) . . ?
 C31A O6A C25A 114.6(10) . . ?
 C6C O2C C8C 109.7(12) . . ?
 C9D O3D C15D 111.3(12) . . ?
 C15A O3A C9A 110.0(10) . . ?
 C25D O6D C31D 115.4(11) . . ?
 C8D O2D C4D 116.6(12) . . ?
 C8A O2A C4A 112.3(13) . . ?
 C35D O10D C37D 102.5(12) . . ?
 C31C O6C C25C 110.6(15) . . ?
 C15C O3C C9C 107.7(12) . . ?
 C35B O10B C37B 105.7(12) . . ?
 C25A C23A C24A 109.6(12) . . ?
 C25A C23A C22A 106.8(12) . . ?
 C22A C23A C24A 113.8(11) . . ?
 O6A C25A C23A 107.1(11) . . ?
 O6A C25A C26A 108.5(11) . . ?
 C23A C25A C26A 114.5(13) . . ?
 O2B C8B C7B 109.8(10) . . ?
 O2B C8B C9B 104.6(10) . . ?
 C7B C8B C9B 116.1(11) . . ?
 C33B C34B C35B 123.2(13) . . ?
 C36B C34B C33B 131.3(13) . . ?
 C36B C34B C35B 105.3(13) . . ?
 O4A C19A C20A 119.6(12) . . ?
 O4A C19A C16A 121.3(12) . . ?
 C16A C19A C20A 119.0(12) . . ?
 C22B C20B C19B 111.4(10) . . ?
 C22B C20B C21B 114.3(12) . . ?
 C21B C20B C19B 109.0(12) . . ?
 O7B C33B C34B 118.4(12) . . ?
 O7B C33B C32B 119.7(12) . . ?
 C34B C33B C32B 122.0(12) . . ?
 O4B C19B C20B 117.5(12) . . ?
 O4B C19B C16B 121.6(11) . . ?
 C16B C19B C20B 120.9(12) . . ?
 C25B C23B C24B 109.5(10) . . ?
 C22B C23B C25B 113.3(10) . . ?
 C22B C23B C24B 111.8(11) . . ?
 C31B C29B C30B 107.1(11) . . ?
 C28B C29B C31B 112.5(12) . . ?
 C28B C29B C30B 109.8(12) . . ?
 C19B C16B C17B 114.3(11) . . ?
 C19B C16B C15B 112.6(11) . . ?
 C17B C16B C15B 114.2(11) . . ?
 C8B C7B C6B 109.5(11) . . ?
 O9B C35B O10B 115.8(13) . . ?
 O9B C35B C34B 134.4(14) . . ?
 O10B C35B C34B 109.7(14) . . ?
 O3A C15A C16A 109.9(10) . . ?
 O3A C15A C13A 105.4(12) . . ?
 C13A C15A C16A 117.3(12) . . ?
 C19A C20A C22A 108.8(11) . . ?
 C19A C20A C21A 108.6(11) . . ?
 C21A C20A C22A 116.4(11) . . ?
 C28A C26A C25A 105.0(13) . . ?
 C27A C26A C25A 112.1(12) . . ?
 C27A C26A C28A 114.0(13) . . ?
 C19A C16A C15A 112.3(11) . . ?
 C19A C16A C17A 112.9(11) . . ?
 C15A C16A C17A 112.5(11) . . ?
 O6B C31B C29B 107.3(10) . . ?
 O6B C31B C32B 110.0(11) . . ?
 C32B C31B C29B 114.8(11) . . ?
 C25B C26B C28B 107.9(10) . . ?
 C25B C26B C27B 115.9(12) . . ?
 C27B C26B C28B 107.9(12) . . ?
 O7D C33D C34D 118.7(13) . . ?
 O7D C33D C32D 124.8(14) . . ?
 C32D C33D C34D 116.2(13) . . ?
 C29B C28B C26B 108.2(11) . . ?
 C3B C2B C1B 115.1(15) . . ?
 C18A C17A C16A 112.8(12) . . ?
 O5A C22A C23A 113.0(10) . . ?
 O5A C22A C20A 105.0(10) . . ?
 C23A C22A C20A 112.5(11) . . ?
 O3A C9A C8A 106.4(14) . . ?
 O3A C9A C10A 107.6(11) . . ?
 O3A C9A C12A 103.4(12) . . ?
 C10A C9A C8A 111.9(14) . . ?
 C12A C9A C8A 111.4(13) . . ?
 C12A C9A C10A 115.3(16) . . ?
 O6B C25B C23B 102.8(10) . . ?
 O6B C25B C26B 111.3(11) . . ?
 C26B C25B C23B 117.0(11) . . ?
 C35D C34D C33D 127.3(14) . . ?
 C36D C34D C33D 121.8(13) . . ?
 C36D C34D C35D 110.9(14) . . ?
 C20B C22B O5B 105.6(10) . . ?
 C23B C22B O5B 110.9(10) . . ?
 C23B C22B C20B 117.7(11) . . ?
 C3B C6B C7B 109.8(11) . . ?
 O8B C36B C34B 123.6(14) . . ?
 O8B C36B C37B 123.3(14) . . ?
 C34B C36B C37B 113.0(14) . . ?
 C36B C37B O10B 106.2(12) . . ?
 C38B C37B O10B 111.3(19) . . ?
 C38B C37B C36B 142(2) . . ?
 C16B C17B C18B 116.5(11) . . ?
 O1B C3B C2B 110.6(12) . . ?
 O1B C3B C6B 103.9(10) . . ?
 O1B C3B C4B 109.2(10) . . ?
 C2B C3B C6B 113.8(13) . . ?
 C2B C3B C4B 109.8(12) . . ?
 C4B C3B C6B 109.3(11) . . ?
 C15A C13A C14A 113.8(14) . . ?
 C15A C13A C12A 99.2(13) . . ?
 C12A C13A C14A 112.4(13) . . ?
 O5D C22D C23D 113.2(13) . . ?
 O5D C22D C20D 106.1(13) . . ?
 C23D C22D C20D 115.6(13) . . ?
 O2B C4B C3B 110.2(10) . . ?
 O2B C4B C5B 109.6(10) . . ?
 C3B C4B C5B 117.4(12) . . ?
 C33B C32B C31B 115.6(11) . . ?
 O7A C33A C34A 115.6(13) . . ?
 O7A C33A C32A 123.5(15) . . ?
 C32A C33A C34A 120.8(14) . . ?
 C9B C12B C13B 104.8(11) . . ?
 C36A C37A O9A 111.6(18) . . ?
 C38A C37A C36A 145(3) . . ?
 C38A C37A O9A 103.8(19) . . ?
 O1D C3D C6D 104.0(13) . . ?
 C4D C3D O1D 105.4(13) . . ?
 C4D C3D C6D 109.5(14) . . ?
 C2D C3D O1D 111.8(14) . . ?
 C2D C3D C4D 111.9(15) . . ?
 C2D C3D C6D 113.7(16) . . ?
 O3B C9B C8B 106.1(10) . . ?
 O3B C9B C12B 107.0(10) . . ?
 O3B C9B C10B 106.3(10) . . ?
 C12B C9B C8B 112.6(11) . . ?
 C12B C9B C10B 114.6(12) . . ?
 C10B C9B C8B 109.6(11) . . ?
 O6A C31A C29A 115.1(13) . . ?
 O6A C31A C32A 112.1(11) . . ?
 C29A C31A C32A 113.9(12) . . ?
 C29A C28A C26A 111.6(12) . . ?
 O10A C36A C37A 123.3(19) . . ?
 O10A C36A C34A 133.6(16) . . ?
 C37A C36A C34A 102.9(18) . . ?
 O1C C3C C6C 109.8(12) . . ?
 O1C C3C C4C 105.0(16) . . ?
 O1C C3C C2C 110.3(14) . . ?
 C6C C3C C2C 100.4(16) . . ?
 C4C C3C C6C 110.1(16) . . ?
 C4C C3C C2C 121.0(14) . . ?
 C22D C23D C24D 110.6(14) . . ?
 C25D C23D C22D 111.7(12) . . ?
 C25D C23D C24D 113.1(14) . . ?
 O3B C15B C16B 105.2(10) . . ?
 C13B C15B O3B 103.9(11) . . ?
 C13B C15B C16B 120.5(11) . . ?
 O2A C8A C9A 102.9(12) . . ?
 C7A C8A O2A 111.2(16) . . ?
 C7A C8A C9A 119.5(15) . . ?
 O10D C35D C34D 110.0(15) . . ?
 O8D C35D O10D 117.6(14) . . ?
 O8D C35D C34D 132.4(16) . . ?
 O3C C9C C8C 105.0(12) . . ?
 O3C C9C C12C 107.4(15) . . ?
 O3C C9C C10C 104.3(13) . . ?
 C12C C9C C8C 107.8(14) . . ?
 C12C C9C C10C 110.7(16) . . ?
 C10C C9C C8C 120.7(17) . . ?
 C36A C34A C33A 124.1(13) . . ?
 C36A C34A C35A 111.8(16) . . ?
 C35A C34A C33A 123.6(17) . . ?
 C33C C34C C36C 125.0(16) . . ?
 C35C C34C C36C 107.4(19) . . ?
 C35C C34C C33C 127.3(19) . . ?
 C19D C16D C17D 109.3(14) . . ?
 C19D C16D C15D 109.7(14) . . ?
 C15D C16D C17D 113.4(14) . . ?
 C15C C13C C12C 97.1(13) . . ?
 C14C C13C C15C 113.0(18) . . ?
 C14C C13C C12C 113.7(14) . . ?
 O6D C31D C32D 112.1(12) . . ?
 O6D C31D C29D 110.3(12) . . ?
 C32D C31D C29D 116.7(14) . . ?
 C36D C37D O10D 111.9(14) . . ?
 C38D C37D O10D 105(2) . . ?
 C38D C37D C36D 143(2) . . ?
 O2D C8D C9D 106.1(12) . . ?
 O2D C8D C7D 108.4(13) . . ?
 C7D C8D C9D 118.2(14) . . ?
 C19C C16C C17C 113.5(13) . . ?
 C15C C16C C19C 106.9(14) . . ?
 C15C C16C C17C 115.1(16) . . ?
 O9D C36D C34D 134.4(17) . . ?
 O9D C36D C37D 120.9(16) . . ?
 C37D C36D C34D 104.4(15) . . ?
 O4C C19C C16C 122.3(17) . . ?
 O4C C19C C20C 123.0(18) . . ?
 C20C C19C C16C 114.7(16) . . ?
 C37C O9C C35C 108.4(16) . . ?
 C33D C32D C31D 114.3(14) . . ?
 O10C C36C C34C 130.5(17) . . ?
 O10C C36C C37C 122.4(17) . . ?
 C34C C36C C37C 107.0(16) . . ?
 C12D C13D C14D 110.8(15) . . ?
 C15D C13D C12D 101.9(14) . . ?
 C15D C13D C14D 117.8(17) . . ?
 C31A C29A C28A 107.0(12) . . ?
 C31A C29A C30A 119.4(15) . . ?
 C30A C29A C28A 108.2(13) . . ?
 O9C C37C C36C 108.3(17) . . ?
 C38C C37C O9C 115(2) . . ?
 C38C C37C C36C 137(2) . . ?
 C33A C32A C31A 114.1(12) . . ?
 O2C C6C C3C 108.0(14) . . ?
 C7C C6C O2C 111.2(14) . . ?
 C7C C6C C3C 118.0(17) . . ?
 O4D C19D C16D 125.2(16) . . ?
 O4D C19D C20D 117.7(15) . . ?
 C16D C19D C20D 116.1(15) . . ?
 O2D C4D C5D 107.8(15) . . ?
 C3D C4D O2D 111.7(13) . . ?
 C3D C4D C5D 113.8(16) . . ?
 C16D C17D C18D 112.7(12) . . ?
 O7C C33C C34C 119.5(16) . . ?
 O7C C33C C32C 115.0(17) . . ?
 C34C C33C C32C 125.5(17) . . ?
 C35A O9A C37A 108.9(15) . . ?
 C12B C13B C14B 115.6(12) . . ?
 C15B C13B C12B 101.4(11) . . ?
 C15B C13B C14B 113.6(14) . . ?
 O3D C9D C8D 107.5(12) . . ?
 O3D C9D C12D 100.2(13) . . ?
 O3D C9D C10D 105.6(13) . . ?
 C8D C9D C12D 114.7(13) . . ?
 C8D C9D C10D 114.5(15) . . ?
 C12D C9D C10D 112.7(13) . . ?
 O2C C8C C9C 101.6(12) . . ?
 C5C C8C O2C 113.8(13) . . ?
 C5C C8C C9C 119.8(17) . . ?
 C22D C20D C19D 108.0(13) . . ?
 C22D C20D C21D 110.5(14) . . ?
 C19D C20D C21D 110.3(15) . . ?
 C29D C28D C26D 107.0(15) . . ?
 C31D C29D C28D 106.2(14) . . ?
 C30D C29D C31D 113.0(14) . . ?
 C30D C29D C28D 107.4(16) . . ?
 C18C C17C C16C 111.0(16) . . ?
 O8C C35C C34C 134(2) . . ?
 O8C C35C O9C 116.9(19) . . ?
 C34C C35C O9C 108.7(18) . . ?
 O8A C35A C34A 130.7(19) . . ?
 O8A C35A O9A 124.6(17) . . ?
 O9A C35A C34A 104.6(19) . . ?
 O1A C3A C6A 103.6(18) . . ?
 O1A C3A C2A 111.0(19) . . ?
 C4A C3A O1A 112.4(18) . . ?
 C4A C3A C6A 112(2) . . ?
 C4A C3A C2A 106(2) . . ?
 C6A C3A C2A 112.6(18) . . ?
 O6D C25D C23D 107.7(12) . . ?
 O6D C25D C26D 109.1(13) . . ?
 C23D C25D C26D 117.8(13) . . ?
 O3C C15C C13C 108.7(17) . . ?
 O3C C15C C16C 108.6(13) . . ?
 C16C C15C C13C 109.9(14) . . ?
 C8D C7D C6D 110.5(14) . . ?
 C25D C26D C28D 109.3(12) . . ?
 C27D C26D C28D 113.0(16) . . ?
 C27D C26D C25D 115.4(15) . . ?
 C31C C29C C28C 106(2) . . ?
 C30C C29C C31C 117(2) . . ?
 C30C C29C C28C 118.0(19) . . ?
 C22C C20C C19C 107.9(15) . . ?
 C22C C20C C21C 120.2(17) . . ?
 C21C C20C C19C 104.2(15) . . ?
 C11A C10A C9A 121.0(16) . . ?
 C9C C12C C13C 104.7(13) . . ?
 C13D C12D C9D 104.9(14) . . ?
 O6C C25C C23C 108.8(13) . . ?
 O6C C25C C26C 117(2) . . ?
 C26C C25C C23C 110.5(19) . . ?
 O5C C22C C20C 107.1(15) . . ?
 O5C C22C C23C 111.6(14) . . ?
 C23C C22C C20C 119.5(16) . . ?
 O3D C15D C16D 107.4(12) . . ?
 C13D C15D O3D 103.9(15) . . ?
 C13D C15D C16D 117.8(15) . . ?
 C33C C32C C31C 115.0(14) . . ?
 C7D C6D C3D 110.2(14) . . ?
 O6C C31C C29C 119(2) . . ?
 O6C C31C C32C 111.3(13) . . ?
 C29C C31C C32C 111.3(15) . . ?
 C25C C23C C22C 112.4(16) . . ?
 C24C C23C C25C 112.6(18) . . ?
 C24C C23C C22C 113.8(18) . . ?
 C11B C10B C9B 117.2(12) . . ?
 C1D C2D C3D 116(2) . . ?
 C9A C12A C13A 104.2(11) . . ?
 C11D C10D C9D 116.8(17) . . ?
 C8A C7A C6A 112.7(17) . . ?
 C8C C5C C4C 112.2(18) . . ?
 C9C C10C C11C 109.8(16) . . ?
 C3C C4C C5C 113.5(15) . . ?
 O2A C4A C5A 109.6(19) . . ?
 C3A C4A O2A 110.8(18) . . ?
 C3A C4A C5A 115.4(19) . . ?
 C25C C26C C27C 114.7(17) . . ?
 C25C C26C C28C 107(2) . . ?
 C28C C26C C27C 109(2) . . ?
 C3A C6A C7A 110.0(18) . . ?
 C26C C28C C29C 110.9(19) . . ?
 C1A C2A C3A 110(2) . . ?
 C37B C38B Br1B 133(2) . . ?
 C1C C2C C3C 110(2) . . ?
 C37D C38D Br1D 141(2) . . ?
 C37C C38C Br1C 126(2) . . ?
 C37A C38A Br1A 135(2) . . ?

_smtbx_masks_special_details       ?
loop_
  _smtbx_masks_void_nr
  _smtbx_masks_void_average_x
  _smtbx_masks_void_average_y
  _smtbx_masks_void_average_z
  _smtbx_masks_void_volume
  _smtbx_masks_void_count_electrons
  _smtbx_masks_void_content
 1 0.190 -0.035 0.001 401.5 75.1 ?
 2 -0.190 0.465 0.499 401.5 77.9 ?
 3 0.230 0.409 0.773 333.6 68.7 ?
 4 -0.230 0.909 0.727 333.6 70.5 ?
 5 0.069 0.625 0.389 7.1 0.4 ?
 6 0.310 0.035 0.501 401.5 78.6 ?
 7 0.270 0.591 0.273 333.6 71.3 ?
 8 0.690 0.535 -0.001 401.5 76.1 ?
 9 0.431 0.375 0.889 7.1 0.5 ?
 10 0.730 0.091 0.227 333.6 69.7 ?
 11 0.569 0.875 0.611 7.1 0.2 ?
 12 0.931 0.125 0.111 7.1 0.6 ?

_olex2_submission_special_instructions  'No special instructions were received'
_oxdiff_exptl_absorpt_empirical_details
;
Empirical correction (ABSPACK) includes:
- Absorption correction using spherical harmonics
- Frame scaling
;
_oxdiff_exptl_absorpt_empirical_full_max  1.902
_oxdiff_exptl_absorpt_empirical_full_min  0.612
# start Validation Reply Form
_vrf_THETM01_exp_64
;
PROBLEM: The value of sine(theta_max)/wavelength is less than 0.550
RESPONSE: The long range order of crystal was the not good enough to 
give scattering out to more than 0.5001 sin(theta)/lambda. 
It is likely due to the disorder of solvent(acetonitrile) 
and large number of degrees of freedom in the fragments that 
are around the sodium atoms. However, the absolute configuration is 
not affected by this disorder. Furthermore, it was observed 
that the crystals decomposes when taken out of the 
mother liqour.
;
_vrf_PLAT027_exp_64
;
PROBLEM: _diffrn_reflns_theta_full value (too) Low ......      20.82 Degree
RESPONSE: The crystals decomposes when taken out of the mother liqour.
Hence, the crystal quality is poor and the crystals do not scatter to high q.
;
_vrf_PLAT090_exp_64
;
PROBLEM: Poor Data / Parameter Ratio (Zmax > 18) ........       5.65 Note  
RESPONSE: The crystal quality and the size of the unit cell give rise to 
this poor ratio.
;
_vrf_PLAT341_exp_64
;
PROBLEM: Low Bond Precision on  C-C Bonds ...............    0.02374 Ang.  
RESPONSE: The poor crystal quality give a high degree of disorder in the crystal
structure. Hence, precise determination of bonds is not possible.
;
# end Validation Reply Form
