# Supplementary material for: Expanding the antibacterial selectivity of polyether ionophore antibiotics through diversity-focused semisynthesis
Source: Springer Nature journal article supplement (doi:10.1038/s41557-020-00601-1), 2020-12-22
Supplement: 41557_2020_601_MOESM70_ESM.fcf [file 41557_2020_601_MOESM70_ESM.fcf]

#
# h,k,l, Fc-squared, Fo-squared, sigma(Fo-squared), status flag
#
data_exp_64
_shelx_title ' exp_64_a.res in P2(1)2(1)2(1)'
_shelx_refln_list_code          4
_shelx_F_calc_maximum      724.41
_exptl_crystal_F_000      6592.00
_reflns_d_resolution_high  1.0000

loop_
 _space_group_symop_operation_xyz
 'x, y, z'
 '-x+1/2, -y, z+1/2'
 '-x, y+1/2, -z+1/2'
 'x+1/2, -y+1/2, -z'

_cell_length_a    17.5111
_cell_length_b    18.5108
_cell_length_c    53.5509
_cell_angle_alpha  90.000
_cell_angle_beta   90.000
_cell_angle_gamma  90.000

_shelx_F_squared_multiplier     1.000

loop_
 _refln_index_h
 _refln_index_k
 _refln_index_l
 _refln_F_squared_calc
 _refln_F_squared_meas
 _refln_F_squared_sigma
 _refln_observed_status
   2   0   0      12191.68       1804.91        81.13 o
   4   0   0     255882.59     347310.84      3138.77 o
   6   0   0      75313.09      57098.78      1196.13 o
   8   0   0      32016.49      35388.69       978.29 o
  10   0   0       8400.96       7708.54       512.79 o
  12   0   0       2390.71       2804.39       338.77 o
  14   0   0       3663.13       5142.51       484.14 o
  16   0   0        442.87        943.57       246.05 o
   1   1   0        444.48        390.02        56.87 o
   2   1   0       3487.96       4007.05        89.16 o
   3   1   0        621.50        244.91        34.18 o
   4   1   0       8676.64       7946.82       170.45 o
   5   1   0      74723.45      56766.07       590.60 o
   6   1   0        535.60       1229.59        84.62 o
   7   1   0       3741.12       3033.44       290.06 o
   8   1   0       5322.71       4734.26       252.38 o
   9   1   0       5126.95       4743.01       270.28 o
  10   1   0       6463.26       4615.82       279.33 o
  11   1   0      10582.32      15255.70       526.92 o
  12   1   0        371.25        262.88       111.28 o
  13   1   0        732.80        463.52       167.10 o
  14   1   0        174.84         23.91        95.67 o
  15   1   0         31.79        299.62       118.58 o
  16   1   0       3176.91       2389.38       266.97 o
  17   1   0        286.56        315.02       132.05 o
   0   2   0       1170.78       5825.62       260.59 o
   1   2   0      35810.66      33430.22       433.19 o
   2   2   0      40315.84      24352.48       522.74 o
   3   2   0     233450.95     315375.59      4719.18 o
   4   2   0      41382.74      36430.78       712.91 o
   5   2   0        336.29        429.14        63.22 o
   6   2   0       4785.27       4160.90       176.14 o
   7   2   0        450.69        954.90       135.05 o
   8   2   0       7435.10       8063.70       348.10 o
   9   2   0       1750.19       1876.64       176.31 o
  10   2   0       1305.05       2036.87       195.49 o
  11   2   0       4212.44       5111.31       382.83 o
  12   2   0         62.11        104.32        84.00 o
  13   2   0        414.17        320.96       113.76 o
  14   2   0        767.36        542.14       168.30 o
  15   2   0         38.97         19.28       102.29 o
  16   2   0        706.79        659.60       145.06 o
  17   2   0        394.51        715.77       166.28 o
   1   3   0        480.23        273.80        54.74 o
   2   3   0      59994.82      51403.38       480.90 o
   3   3   0        733.15       1287.27       111.13 o
   4   3   0       8809.31       5496.71       184.93 o
   5   3   0       1641.80       2034.43       196.33 o
   6   3   0        367.43        458.76       118.84 o
   7   3   0       1885.48       1387.02       144.58 o
   8   3   0      20032.52      16193.88       480.45 o
   9   3   0       8978.11       9172.83       515.44 o
  10   3   0        354.69        199.22        86.98 o
  11   3   0        137.39        108.09        71.71 o
  12   3   0       9381.17       8520.94       426.62 o
  13   3   0         88.80        234.51       106.28 o
  14   3   0       7566.90       6435.62       407.28 o
  15   3   0        688.72        557.18       140.02 o
  16   3   0         32.38        118.56        97.52 o
  17   3   0        160.48        168.78       120.14 o
   0   4   0      60989.97      83704.25      2952.55 o
   1   4   0      14017.21      12967.18       232.17 o
   2   4   0      69754.98      65498.47       647.93 o
   3   4   0       6415.40       4209.10       215.21 o
   4   4   0      75464.42      65215.26      1185.86 o
   5   4   0        634.01        654.66        79.79 o
   6   4   0       1278.86        637.09       151.02 o
   7   4   0       1623.74       1095.27       209.47 o
   8   4   0         49.82         89.63        76.37 o
   9   4   0       3318.36       3280.83       241.91 o
  10   4   0       1792.17       2827.74       262.34 o
  11   4   0        145.25        243.91        91.43 o
  12   4   0        470.62        483.59       119.24 o
  13   4   0        492.77        296.88       104.99 o
  14   4   0       2192.56       2244.97       249.91 o
  15   4   0       4924.49       5192.16       394.72 o
  16   4   0        230.45         18.98        85.97 o
  17   4   0          7.76        -75.39       104.69 o
   1   5   0      14524.17      14869.99       579.64 o
   2   5   0      25333.88      19734.57       311.38 o
   3   5   0        349.19        209.96        49.39 o
   4   5   0       1357.57       1579.43       110.53 o
   5   5   0        126.73        354.15       124.62 o
   6   5   0      58844.92      61032.15      1345.79 o
   7   5   0      10262.54      10924.34       582.90 o
   8   5   0      28372.29      24555.89       916.09 o
   9   5   0        343.91        268.98       143.53 o
  10   5   0       3760.07       2601.84       327.60 o
  11   5   0       1740.26       1282.99       259.25 o
  12   5   0        400.89        413.71       150.77 o
  13   5   0       2524.24       1840.15       322.60 o
  14   5   0       4938.20       7075.39       614.06 o
  15   5   0       1172.53        958.97       251.81 o
  16   5   0        621.68        743.85       258.94 o
   0   6   0      65058.83      43477.31      1358.86 o
   1   6   0      12129.92       9905.61       255.08 o
   2   6   0       7981.20      10224.46       251.03 o
   3   6   0      23813.48      18425.37       423.43 o
   4   6   0         66.99         85.64        54.80 o
   5   6   0       3427.85       4711.93       843.82 o
   6   6   0        279.76       1142.24       238.42 o
   7   6   0         58.34        131.03       110.53 o
   8   6   0      12399.56      13734.39       708.79 o
   9   6   0       1289.53       1378.81       266.83 o
  10   6   0        270.08        486.84       188.14 o
  11   6   0        642.06        636.19       212.33 o
  12   6   0        230.25         33.77       106.53 o
  13   6   0         31.96         58.28       112.94 o
  14   6   0         17.73        -65.51       138.66 o
  15   6   0         57.61        133.84       139.47 o
  16   6   0       1141.24       1425.88       312.93 o
   1   7   0       8368.92       8965.42       727.72 o
   2   7   0       9291.31      11465.37       323.92 o
   3   7   0      21169.32      22626.30       481.20 o
   4   7   0        349.79       1081.34       201.66 o
   5   7   0        276.32        283.07        80.11 o
   6   7   0       3489.32       2753.30       541.31 o
   7   7   0       7808.96       6464.10       486.26 o
   8   7   0        139.94        531.80       192.94 o
   9   7   0        895.35        666.96       223.26 o
  10   7   0      19455.91      15377.32       841.02 o
  11   7   0       2670.59       2443.34       347.26 o
  12   7   0        103.77        119.78       130.63 o
  13   7   0       1170.14       1280.04       286.82 o
  14   7   0        940.50       1201.34       283.94 o
  15   7   0         15.02         61.89       133.84 o
  16   7   0          8.64       -162.77       166.39 o
   0   8   0      26392.93      25012.88       664.41 o
   1   8   0        387.08        524.90       119.59 o
   2   8   0       4500.41       4868.16       234.12 o
   3   8   0        186.48        434.05       122.20 o
   4   8   0       2409.02       1636.00       173.69 o
   5   8   0        193.83        857.07       221.50 o
   6   8   0      31532.45      34830.78      1829.70 o
   7   8   0       9357.40      11019.30      1622.17 o
   8   8   0       6356.73       6304.48       545.70 o
   9   8   0        472.86        858.46       230.80 o
  10   8   0        156.61         28.94       106.52 o
  11   8   0        325.41        269.35       176.49 o
  12   8   0        301.71        105.73       126.63 o
  13   8   0       5414.32       4075.32       470.97 o
  14   8   0       2139.81       2973.52       423.06 o
  15   8   0        182.99        217.06       156.76 o
   1   9   0       8459.91       7418.82       268.97 o
   2   9   0       3700.77       5602.56       265.75 o
   3   9   0      21249.38      17388.16       535.74 o
   4   9   0       1616.62       1632.45       179.90 o
   5   9   0       3683.26       2778.31       360.41 o
   6   9   0      13093.01      13832.87       773.16 o
   7   9   0       3450.56       3828.62       258.01 o
   8   9   0        356.73        614.97       169.06 o
   9   9   0       1602.26       2361.45       354.20 o
  10   9   0       1342.32       1520.17       305.40 o
  11   9   0       1538.07       1911.07       341.25 o
  12   9   0         14.03         59.48       111.73 o
  13   9   0         70.12        440.11       170.82 o
  14   9   0        446.68        117.80       167.25 o
  15   9   0        744.91        631.31       232.42 o
   0  10   0        825.14       1086.18       174.96 o
   1  10   0       1052.72        968.76       118.59 o
   2  10   0       8771.89       8345.57       593.96 o
   3  10   0       5052.29       6271.22       468.45 o
   4  10   0       1726.93       2434.52       379.31 o
   5  10   0        470.37        590.29       199.44 o
   6  10   0        512.17        439.51       174.52 o
   7  10   0       1101.72       1339.77       319.45 o
   8  10   0        378.81        378.73       186.55 o
   9  10   0        632.33       1302.89       290.74 o
  10  10   0       2490.39       3306.49       436.17 o
  11  10   0         44.67         21.70       119.77 o
  12  10   0        498.42        576.95       227.16 o
  13  10   0       2111.25       1707.89       347.37 o
  14  10   0        304.53        405.61       213.05 o
   1  11   0       2149.72       2940.01       215.66 o
   2  11   0       5195.71       6113.03       388.78 o
   3  11   0        159.61        237.06       102.65 o
   4  11   0        128.71        273.73       175.25 o
   5  11   0       8139.71       7590.10       643.72 o
   6  11   0       1016.59        708.03       210.80 o
   7  11   0         24.90        218.64       166.39 o
   8  11   0        740.69        583.14       205.10 o
   9  11   0        865.56       1032.03       276.71 o
  10  11   0        506.25        404.08       199.02 o
  11  11   0       9774.03      11609.74       852.72 o
  12  11   0       5168.14       6909.48       655.57 o
  13  11   0          3.28        -53.45       137.45 o
  14  11   0         79.61        278.53       209.40 o
   0  12   0       6449.26       5407.40       362.42 o
   1  12   0       1246.85        842.06       112.38 o
   2  12   0        219.61        314.37        75.27 o
   3  12   0        670.01        647.40       150.48 o
   4  12   0       3826.65       4946.76       552.19 o
   5  12   0       1891.81       2434.94       384.49 o
   6  12   0         29.90        147.10       165.99 o
   7  12   0        325.94        710.77       254.07 o
   8  12   0       4597.59       4709.26       546.25 o
   9  12   0         84.27        352.49       192.12 o
  10  12   0         29.06        284.15       189.30 o
  11  12   0        457.47        533.51       232.78 o
  12  12   0        169.09        301.46       193.34 o
  13  12   0        207.29        -56.68       139.08 o
   1  13   0        148.06        148.14        69.76 o
   2  13   0        172.35         43.14        60.58 o
   3  13   0        125.15        182.51       157.36 o
   4  13   0        704.55        616.61       132.51 o
   5  13   0        642.27        440.73       190.21 o
   6  13   0        470.17        439.86       234.40 o
   7  13   0       3159.69       2289.89       411.40 o
   8  13   0       9963.67      11337.27       861.94 o
   9  13   0        202.54        212.24       166.01 o
  10  13   0        968.08        687.34       229.25 o
  11  13   0         47.38        310.28       206.59 o
  12  13   0         13.00        -30.14       146.70 o
   0  14   0       9262.13      10027.40       533.69 o
   1  14   0        178.28        287.33        85.63 o
   2  14   0        773.66       1277.16       137.40 o
   3  14   0       1895.36       1453.20       284.60 o
   4  14   0        172.07        102.90       170.43 o
   5  14   0        964.44       1048.18       288.39 o
   6  14   0        773.96        689.69       236.87 o
   7  14   0        734.87       1277.58       347.04 o
   8  14   0         85.75        311.90       213.02 o
   9  14   0       1289.64       2081.81       386.59 o
  10  14   0        134.52        171.23       139.07 o
  11  14   0        723.25        548.07       235.23 o
   1  15   0       3160.02       3569.11       208.13 o
   2  15   0       1302.81        882.52       145.08 o
   3  15   0        623.87        463.09       113.90 o
   4  15   0        398.21        498.52       265.34 o
   5  15   0        240.80        413.64       242.39 o
   6  15   0        469.41        657.75       244.04 o
   7  15   0        825.00       1420.39       342.63 o
   8  15   0         11.80        161.57       194.12 o
   9  15   0         11.09       -194.52       194.52 o
  10  15   0        123.71        176.45       171.23 o
   0  16   0       1537.65       1951.13       414.45 o
   1  16   0       2039.56       1681.07       262.93 o
   2  16   0       2127.21       2326.26       310.95 o
   3  16   0       1057.36        460.71       388.35 o
   4  16   0        478.04        363.32       342.75 o
   5  16   0          1.21       -116.15       203.36 o
   6  16   0       1462.71       2144.80       432.50 o
   7  16   0        269.50        278.17       195.76 o
   8  16   0        258.45        584.47       270.13 o
   1  17   0         16.59        -53.40       110.11 o
   2  17   0       5615.68       5478.29      1588.89 o
   3  17   0        553.87        586.49       243.45 o
   4  17   0         24.58       -137.70       180.86 o
   5  17   0          1.43        -39.92       284.15 o
   6  17   0        259.59        248.82       214.25 o
   0  18   0         58.78        155.14       188.90 o
   1  18   0        558.89        551.12       164.44 o
   2  18   0         18.13         72.77       130.46 o
   3  18   0        183.08        284.46       179.67 o
   4  18   0       1160.78       1183.34       320.37 o
   2   0   1       7814.78       4323.16       110.16 o
   3   0   1      45499.68      52181.40       603.33 o
   4   0   1      26654.64      21622.63       718.71 o
   5   0   1     142442.06     154738.53      1235.82 o
   6   0   1      10737.19       8129.90       208.05 o
   7   0   1       3272.97       4733.58       233.07 o
   8   0   1      27304.88      18017.47       549.33 o
   9   0   1       3879.28       3130.65       227.30 o
  10   0   1       2221.85       1992.76       195.53 o
  11   0   1        910.08        932.71       142.49 o
  12   0   1       2901.74       3045.80       251.20 o
  13   0   1       1123.16        985.27       163.18 o
  14   0   1       1552.47       2004.64       235.23 o
  15   0   1       3106.93       3645.09       305.06 o
  16   0   1        233.73        568.36       155.53 o
  17   0   1         67.65         62.85       101.06 o
 -17   1   1        379.32        230.08       144.92 o
 -16   1   1       1345.66       2112.60       248.76 o
 -15   1   1        335.50        538.17       131.30 o
 -14   1   1        476.70        361.68       116.46 o
 -13   1   1        277.64        268.21       105.50 o
 -12   1   1       3395.05       2825.97       241.72 o
 -11   1   1       4797.20       6177.66       341.55 o
 -10   1   1        832.63       1352.54       161.26 o
  -9   1   1       7728.06       5006.90       279.44 o
  -8   1   1       2590.29       2574.59       329.13 o
  -7   1   1        344.30       1001.69       213.93 o
  -6   1   1       9819.90       8809.06       215.82 o
  -5   1   1      22414.11      29524.79       363.27 o
  -4   1   1       4805.61       4970.56       133.69 o
  -3   1   1      24925.93      15350.62       389.48 o
  -2   1   1      40730.36      42619.20       538.43 o
  -1   1   1       9537.45      12429.78       187.48 o
   1   1   1       8006.70      11131.03       305.85 o
   2   1   1      46735.11      49766.66       655.73 o
   3   1   1      30106.51      19904.04       299.08 o
   4   1   1       3684.12       3883.24       117.77 o
   5   1   1      25136.59      32986.13       475.79 o
   6   1   1       7715.03       7039.14       192.57 o
   7   1   1        905.91        920.21       121.37 o
   8   1   1       2710.60       2809.98       225.91 o
   9   1   1       7806.18       5454.84       340.45 o
  10   1   1        689.61       1318.45       161.51 o
  11   1   1       5753.88       6870.44       578.51 o
  12   1   1       2857.26       2246.16       216.61 o
  13   1   1        349.40        310.99       112.09 o
  14   1   1        327.57        164.29        87.64 o
  15   1   1        491.86        719.40       150.13 o
  16   1   1       1711.46       2205.40       252.37 o
  17   1   1        473.37        403.08       134.34 o
 -17   2   1        231.30        137.68        95.03 o
 -16   2   1        463.57        205.61       113.41 o
 -15   2   1        786.54        397.76       126.10 o
 -14   2   1       3017.11       2480.06       244.17 o
 -13   2   1       2705.77       2939.64       254.97 o
 -12   2   1       1003.54       1404.12       344.15 o
 -11   2   1       2764.34       2074.45       204.79 o
 -10   2   1       2003.27       1967.21       267.46 o
  -9   2   1       1128.61       1794.36       184.38 o
  -8   2   1       1175.52       1517.07       155.36 o
  -7   2   1      17908.34      18909.59       479.81 o
  -6   2   1      23019.97      28301.23       518.41 o
  -5   2   1      34241.00      26423.92       635.65 o
  -4   2   1       6588.04       4823.57       138.71 o
  -3   2   1       3990.61       5617.78       329.29 o
  -2   2   1      10011.84       7720.37       210.24 o
  -1   2   1      16721.79      16206.96       482.24 o
   0   2   1       7351.27       2019.37        99.70 o
   1   2   1      20875.54      21041.72       268.10 o
   2   2   1       8889.17       6990.23       200.54 o
   3   2   1       6670.30       7232.16       188.26 o
   4   2   1       4782.71       4074.18       213.84 o
   5   2   1      35518.00      28086.60       369.19 o
   6   2   1      22076.33      27526.78       390.17 o
   7   2   1      18842.00      19009.49       483.32 o
   8   2   1       1969.19       1804.70       165.41 o
   9   2   1       1242.62       1612.04       178.65 o
  10   2   1       1395.66       1748.23       272.91 o
  11   2   1       2924.17       2629.27       231.73 o
  12   2   1        984.92       1174.33       246.39 o
  13   2   1       3315.72       3401.70       275.69 o
  14   2   1       2813.76       1974.90       220.61 o
  15   2   1        919.96        593.65       144.48 o
  16   2   1        536.30        307.45       115.76 o
  17   2   1        236.68        162.14        99.36 o
 -17   3   1        463.74        658.09       166.02 o
 -16   3   1        596.59        625.57       152.59 o
 -15   3   1        523.24        233.92       116.43 o
 -14   3   1       2919.96       3422.85       397.21 o
 -13   3   1       1157.95       1467.41       192.13 o
 -12   3   1       3902.38       4121.31       293.47 o
 -11   3   1       3249.31       3443.28       259.73 o
 -10   3   1       5143.21       6615.46       478.71 o
  -9   3   1       6428.26       6853.10       336.18 o
  -8   3   1       7638.32       7641.04       330.04 o
  -7   3   1       2718.19       2218.38       185.12 o
  -6   3   1       4016.78       6068.70       477.02 o
  -5   3   1      15670.45      14903.03       320.35 o
  -4   3   1       9364.54       5685.26       265.66 o
  -3   3   1       4891.85       2349.64       142.79 o
  -2   3   1     117038.10      96928.02      4221.45 o
  -1   3   1      31778.72      22282.53       330.14 o
   0   3   1      53840.40      61612.81       494.92 o
   1   3   1      26031.46      18445.09       302.49 o
   2   3   1     114680.85      98201.16      1949.01 o
   3   3   1       3782.88       1764.61       215.76 o
   4   3   1       9451.80       5870.46       190.60 o
   5   3   1      15124.44      15113.66       323.63 o
   6   3   1       3689.32       4863.87       268.71 o
   7   3   1       3287.81       2779.75       201.60 o
   8   3   1       7254.97       7487.72       327.59 o
   9   3   1       7556.82       8323.87       369.02 o
  10   3   1       6016.75       7126.67       356.33 o
  11   3   1       3174.67       3036.13       244.98 o
  12   3   1       3597.96       4015.78       289.67 o
  13   3   1       1314.69       1403.67       188.50 o
  14   3   1       3675.73       4086.12       633.87 o
  15   3   1        468.83        194.70       112.84 o
  16   3   1        467.97        530.05       150.15 o
  17   3   1        504.63        607.38       159.02 o
 -17   4   1        569.94        445.63       145.11 o
 -16   4   1        360.24        600.24       153.21 o
 -15   4   1        490.33        795.07       168.54 o
 -14   4   1       1296.82       1550.93       201.66 o
 -13   4   1        325.18        385.15       130.19 o
 -12   4   1        232.72        255.79       105.07 o
 -11   4   1       1483.37       1433.72       176.87 o
 -10   4   1      13485.90      12290.79       493.19 o
  -9   4   1       2914.53       3457.50       241.40 o
  -8   4   1       1373.16       1195.33       202.91 o
  -7   4   1      15279.13      12576.98       604.57 o
  -6   4   1       4668.91       7976.98       450.99 o
  -5   4   1      12258.22      13907.37       330.42 o
  -4   4   1      17898.61      23195.86       684.96 o
  -3   4   1      36626.47      27537.27       873.20 o
  -2   4   1      21116.55      20228.61       331.31 o
  -1   4   1      18391.32      16563.96       350.42 o
   0   4   1     198402.69     226672.14      1824.62 o
   1   4   1      18864.93      16254.36       363.59 o
   2   4   1      19946.74      18762.65       376.95 o
   3   4   1      36031.35      28641.45      1341.58 o
   4   4   1      17653.22      21737.16       550.92 o
   5   4   1      13373.24      14625.86       338.49 o
   6   4   1       5428.25       8980.58       480.30 o
   7   4   1      16269.08      12382.07       599.21 o
   8   4   1       1606.59       1290.72       213.44 o
   9   4   1       2564.82       3317.96       267.85 o
  10   4   1      11844.25       9981.04       422.01 o
  11   4   1       1596.52       1657.93       191.69 o
  12   4   1        343.72        401.69       116.12 o
  13   4   1        234.64        214.29       106.17 o
  14   4   1       1273.59       1626.36       212.69 o
  15   4   1        540.51        712.87       165.86 o
  16   4   1        576.71        819.13       173.61 o
  17   4   1        655.76        525.76       158.62 o
 -16   5   1       1171.04       1661.23       333.86 o
 -15   5   1        391.86        587.35       215.89 o
 -14   5   1       3482.13       3200.61       417.10 o
 -13   5   1       2516.29       2138.97       340.32 o
 -12   5   1        117.33        228.71       141.89 o
 -11   5   1        561.01        430.67       155.22 o
 -10   5   1       1295.68       1723.64       271.64 o
  -9   5   1      11769.48       9634.78       584.62 o
  -8   5   1        448.82        992.44       231.62 o
  -7   5   1       1144.70       1547.26       255.60 o
  -6   5   1      21006.90      27098.92       884.00 o
  -5   5   1        418.71        307.26       136.74 o
  -4   5   1       2617.46       2856.43       139.73 o
  -3   5   1        615.99        763.17        79.99 o
  -2   5   1      25274.21      22210.14       333.62 o
  -1   5   1      45820.21      41197.80       768.25 o
   0   5   1     119194.84     157428.17      1621.12 o
   1   5   1      49835.97      44588.85       495.65 o
   2   5   1      24435.33      20994.20       317.70 o
   3   5   1        299.51        465.27        60.24 o
   4   5   1       2195.34       2587.10       159.29 o
   5   5   1        169.53        438.60       147.14 o
   6   5   1      20405.14      26666.07       878.72 o
   7   5   1        591.29        860.35       206.34 o
   8   5   1       1026.73       1281.25       252.31 o
   9   5   1      10659.33       9266.60       577.41 o
  10   5   1       1674.52       2210.23       300.74 o
  11   5   1        350.99        165.64       141.92 o
  12   5   1        155.47        227.91       147.12 o
  13   5   1       2208.46       2253.58       349.09 o
  14   5   1       3700.61       3513.94       438.54 o
  15   5   1        526.43        652.95       220.33 o
  16   5   1       1124.94       1805.98       338.67 o
 -16   6   1       1131.74       1264.18       300.46 o
 -15   6   1        899.83        887.58       246.93 o
 -14   6   1        679.55        617.24       204.68 o
 -13   6   1         89.63        -12.86       122.59 o
 -12   6   1        352.20        278.60       147.95 o
 -11   6   1       4439.84       4991.03       472.55 o
 -10   6   1       5164.10       5778.06       494.83 o
  -9   6   1       4619.70       4841.60       449.51 o
  -8   6   1      15877.95      15429.85       736.90 o
  -7   6   1       1511.48       1572.39       247.64 o
  -6   6   1       7001.58       8934.26       554.59 o
  -5   6   1      31813.18      31626.50      1056.94 o
  -4   6   1       4645.90       5013.61       357.52 o
  -3   6   1      10999.23       8480.37       278.76 o
  -2   6   1       5550.71       6425.16       200.37 o
  -1   6   1       1897.26       1604.64       106.82 o
   0   6   1        258.41        412.54        76.77 o
   1   6   1       3298.66       2851.77       138.30 o
   2   6   1       6177.79       7363.00       268.70 o
   3   6   1      12412.44       9191.18       333.08 o
   4   6   1       5299.91       5555.17       742.32 o
   5   6   1      34767.41      34433.13      3620.22 o
   6   6   1       7392.93       8440.45       539.86 o
   7   6   1       1517.58       1372.28       222.67 o
   8   6   1      14416.47      14542.53       719.36 o
   9   6   1       4987.38       5533.15       480.39 o
  10   6   1       5047.25       4792.69       459.64 o
  11   6   1       4745.49       4441.43       452.90 o
  12   6   1        325.09        203.42       125.03 o
  13   6   1         52.17         67.92       132.23 o
  14   6   1        637.51        443.52       179.34 o
  15   6   1        701.81        507.86       198.64 o
  16   6   1       1217.48       1287.58       305.30 o
 -16   7   1        232.00         74.36       126.22 o
 -15   7   1        286.32        464.70       212.25 o
 -14   7   1        419.56        687.88       202.22 o
 -13   7   1       2151.36       2136.13       344.62 o
 -12   7   1        809.03        667.21       212.35 o
 -11   7   1        709.30        926.57       232.45 o
 -10   7   1       7174.46       8023.40       596.02 o
  -9   7   1       9570.42       8716.25       604.21 o
  -8   7   1       4965.20       4761.12       442.86 o
  -7   7   1        842.81        881.04       209.20 o
  -6   7   1       4904.92       4619.48       239.53 o
  -5   7   1      12122.21       9135.51       930.79 o
  -4   7   1       4255.91       3398.07       227.89 o
  -3   7   1       5395.92       6065.93       242.08 o
  -2   7   1       4876.87       6849.76       330.13 o
  -1   7   1       1822.98       2276.20       262.43 o
   0   7   1      45320.70      38362.41       558.45 o
   1   7   1       1291.96       1802.61       294.62 o
   2   7   1       5500.02       7001.70       373.86 o
   3   7   1       5573.20       5825.46       210.00 o
   4   7   1       3671.49       2943.58       171.72 o
   5   7   1      15043.53      11694.24       502.01 o
   6   7   1       4375.50       4600.30       253.22 o
   7   7   1        646.54        824.12       208.34 o
   8   7   1       5624.51       5152.27       468.65 o
   9   7   1       9006.45       7954.18       575.48 o
  10   7   1       7113.92       8237.38       600.03 o
  11   7   1        670.40        893.56       241.29 o
  12   7   1        569.10        375.96       169.68 o
  13   7   1       2254.28       2464.04       386.92 o
  14   7   1        457.25        784.38       242.43 o
  15   7   1        148.38        367.38       194.54 o
  16   7   1        203.16        257.66       176.06 o
 -15   8   1        162.78        361.35       191.33 o
 -14   8   1       1547.09       1676.63       337.58 o
 -13   8   1       2458.04       2472.76       395.82 o
 -12   8   1        550.68        290.71       164.05 o
 -11   8   1        515.94        778.03       235.22 o
 -10   8   1       1386.21        990.74       238.63 o
  -9   8   1       1280.17       1800.75       306.63 o
  -8   8   1       4781.15       3864.27       423.26 o
  -7   8   1       7211.40       6648.80       540.15 o
  -6   8   1       2313.54       2707.12       203.59 o
  -5   8   1      15563.96      15201.55       758.11 o
  -4   8   1       2766.64       3376.26       240.79 o
  -3   8   1      15180.24      14359.58       395.29 o
  -2   8   1      16311.23      16121.34       464.32 o
  -1   8   1       2108.74       2300.21       200.59 o
   0   8   1        360.13        553.30        93.11 o
   1   8   1       2988.77       3274.35       229.88 o
   2   8   1      15450.25      14657.43       399.64 o
   3   8   1      15421.44      14438.89       364.77 o
   4   8   1       1538.48       2359.75       226.32 o
   5   8   1      14299.50      13806.58       475.59 o
   6   8   1       2932.85       3282.99       303.67 o
   7   8   1       6600.99       6347.57       314.40 o
   8   8   1       4037.71       2456.93       349.09 o
   9   8   1       1217.23       1586.57       292.93 o
  10   8   1       1170.01       1005.83       242.20 o
  11   8   1        877.10        985.81       241.32 o
  12   8   1        402.23        370.68       183.73 o
  13   8   1       2302.54       2153.60       366.38 o
  14   8   1       1394.40       1502.24       314.21 o
  15   8   1        100.58         43.81       140.68 o
 -15   9   1        276.63         90.04       141.90 o
 -14   9   1        293.24        521.78       217.48 o
 -13   9   1        438.85        383.14       171.27 o
 -12   9   1       1399.00       1246.47       284.86 o
 -11   9   1       2379.02       3202.22       419.20 o
 -10   9   1       3208.95       3418.88       432.85 o
  -9   9   1       5202.27       4342.72       468.03 o
  -8   9   1       1586.85        963.37       130.09 o
  -7   9   1        683.59        746.77       127.76 o
  -6   9   1       1079.39       1116.59       251.08 o
  -5   9   1       5796.26       6227.26       521.47 o
  -4   9   1        113.06         75.58        55.36 o
  -3   9   1      12310.31      14090.14       570.07 o
  -2   9   1       7616.49       7203.62       300.71 o
  -1   9   1       2412.41       2152.31       149.91 o
   0   9   1        105.91        150.78        59.68 o
   1   9   1       2591.76       2570.19       193.82 o
   2   9   1       7224.99       6647.26       288.70 o
   3   9   1      13651.76      15312.06       553.24 o
   4   9   1        274.77        290.27       150.36 o
   5   9   1       5166.83       4807.12       460.46 o
   6   9   1       1656.56       1401.69       246.41 o
   7   9   1        843.15       1165.59       169.55 o
   8   9   1       1510.90       1004.98       138.79 o
   9   9   1       4266.37       3354.93       413.57 o
  10   9   1       3030.92       3157.63       419.49 o
  11   9   1       2726.07       3145.13       417.31 o
  12   9   1       1831.86       1793.06       326.01 o
  13   9   1        421.18        364.64       172.07 o
  14   9   1        390.05        543.12       215.08 o
  15   9   1        337.15        220.29       180.90 o
 -14  10   1        382.70        284.62       168.04 o
 -13  10   1        248.96        436.95       200.18 o
 -12  10   1        666.77       1032.61       274.24 o
 -11  10   1        448.62        449.49       187.35 o
 -10  10   1        788.86       1062.93       292.78 o
  -9  10   1       1211.47       1102.39       263.12 o
  -8  10   1       3182.40       3506.39       428.07 o
  -7  10   1      22493.40      23050.46      1071.50 o
  -6  10   1        981.69       1174.73       251.84 o
  -5  10   1        681.05        791.52       230.05 o
  -4  10   1        985.79        805.08       247.04 o
  -3  10   1       7957.56       7731.92       309.25 o
  -2  10   1       8436.20       8786.68       446.71 o
  -1  10   1       4087.89       3200.02       185.28 o
   0  10   1       4109.97       4804.83       228.62 o
   1  10   1       4239.21       3030.24       292.32 o
   2  10   1       7457.68       8751.87       432.53 o
   3  10   1       7956.54       7050.12       345.92 o
   4  10   1        768.54        379.32       199.51 o
   5  10   1        712.59        948.40       253.79 o
   6  10   1        852.40       1129.52       254.22 o
   7  10   1      22930.82      22179.24      1056.33 o
   8  10   1       3948.08       4342.59       474.76 o
   9  10   1       1161.43       1421.37       298.92 o
  10  10   1        713.62        921.31       278.28 o
  11  10   1        469.18        453.52       179.32 o
  12  10   1        636.27        751.92       239.25 o
  13  10   1        428.16        681.84       237.20 o
  14  10   1        519.94        623.98       243.24 o
 -14  11   1        188.83        356.94       196.15 o
 -13  11   1        311.10        631.53       242.80 o
 -12  11   1        515.93       1088.77       311.59 o
 -11  11   1       2353.86       2667.81       417.12 o
 -10  11   1        635.42       1022.16       279.87 o
  -9  11   1       2437.39       3448.91       460.71 o
  -8  11   1        932.54       1318.11       277.54 o
  -7  11   1         98.65        395.91       209.01 o
  -6  11   1       1185.15        957.20       255.09 o
  -5  11   1       1701.26       1619.56       330.92 o
  -4  11   1       3122.35       3303.63       435.83 o
  -3  11   1       4861.52       4348.72       303.78 o
  -2  11   1        516.71        137.71       251.53 o
  -1  11   1       6625.88       7240.94       293.84 o
   0  11   1        784.71        582.78        91.02 o
   1  11   1       6801.55       7392.90       295.78 o
   2  11   1        438.00        147.16       121.83 o
   3  11   1       4408.67       3944.45       278.85 o
   4  11   1       2820.55       2979.78       416.76 o
   5  11   1       1751.76       1540.73       321.67 o
   6  11   1       1135.53       1108.84       260.71 o
   7  11   1         64.26        329.98       187.70 o
   8  11   1       1179.08       1307.13       286.05 o
   9  11   1       2829.16       4130.85       499.54 o
  10  11   1        692.05        859.75       259.77 o
  11  11   1       2539.96       2769.67       423.62 o
  12  11   1        629.22       1414.95       338.96 o
  13  11   1        299.56        329.63       177.68 o
  14  11   1        172.80        159.17       168.42 o
 -13  12   1         36.87        215.02       168.80 o
 -12  12   1       1186.88       1104.96       289.21 o
 -11  12   1        217.70        234.35       181.29 o
 -10  12   1        476.39        246.46       186.55 o
  -9  12   1        620.80        754.35       230.41 o
  -8  12   1        506.77        403.28       224.36 o
  -7  12   1       6515.78       6583.17       621.18 o
  -6  12   1         15.92         -1.21       141.47 o
  -5  12   1       1225.16       1194.19       274.81 o
  -4  12   1        551.95        904.35       258.56 o
  -3  12   1       3688.98       3756.49       303.43 o
  -2  12   1         79.99         85.62        56.66 o
  -1  12   1       5982.11       4886.81       262.48 o
   0  12   1       3767.92       2969.35       195.16 o
   1  12   1       6072.08       4972.61       438.80 o
   2  12   1        148.43        125.27        72.66 o
   3  12   1       3889.32       4134.29       307.89 o
   4  12   1        962.46       1494.43       318.60 o
   5  12   1       1171.38       1066.60       260.71 o
   6  12   1         63.55         49.84       143.89 o
   7  12   1       6108.45       6632.20       620.96 o
   8  12   1        533.46        650.57       227.98 o
   9  12   1        488.89        533.13       208.27 o
  10  12   1        323.83        131.46       162.01 o
  11  12   1        200.20        220.68       195.35 o
  12  12   1       1131.33       1014.01       275.12 o
  13  12   1         22.24         36.98       139.86 o
 -12  13   1        122.80        268.90       195.74 o
 -11  13   1       1523.99       2141.65       407.57 o
 -10  13   1       1281.31       1517.01       330.68 o
  -9  13   1       2026.69       2235.22       390.05 o
  -8  13   1       2911.65       3423.21       480.97 o
  -7  13   1       1807.98       1956.93       366.27 o
  -6  13   1        962.67       1073.15       295.64 o
  -5  13   1        200.68        -83.61       172.04 o
  -4  13   1       2223.39       2576.10       241.29 o
  -3  13   1        290.86        197.05       109.95 o
  -2  13   1        667.79        796.58       133.79 o
  -1  13   1        524.01        429.83        89.79 o
   0  13   1       1506.67       1342.14       133.60 o
   1  13   1        757.78        689.00       104.53 o
   2  13   1        595.68        655.52       111.73 o
   3  13   1        343.86        233.72       129.05 o
   4  13   1       2430.92       3252.75       463.99 o
   5  13   1        128.95        157.16       153.95 o
   6  13   1       1045.98        963.00       280.37 o
   7  13   1       2174.91       2670.55       422.75 o
   8  13   1       2913.10       3168.22       460.03 o
   9  13   1       1997.73       1931.27       373.53 o
  10  13   1       1003.34        833.76       265.45 o
  11  13   1       1623.15       1992.52       391.91 o
  12  13   1        106.21        265.28       184.49 o
 -11  14   1        307.10        793.12       293.85 o
 -10  14   1         69.29        101.28       157.96 o
  -9  14   1        253.48         47.43       147.12 o
  -8  14   1        762.43       1193.54       325.33 o
  -7  14   1       7254.98       7675.66       716.16 o
  -6  14   1       1340.08        981.69       276.40 o
  -5  14   1       2037.21       2481.44       430.35 o
  -4  14   1       1037.44       1310.13       331.45 o
  -3  14   1       4253.76       4698.10       320.90 o
  -2  14   1         13.98        -54.22        69.35 o
  -1  14   1        557.52        450.65        88.46 o
   0  14   1        126.62        352.77       109.01 o
   1  14   1        449.39        297.00        86.11 o
   2  14   1          4.75        -59.21        77.72 o
   3  14   1       3516.87       3367.00       332.96 o
   4  14   1       1278.95       2008.44       391.87 o
   5  14   1       2247.92       2659.03       441.69 o
   6  14   1       1169.19        982.36       298.09 o
   7  14   1       7026.09       7678.36       711.99 o
   8  14   1        691.85       1070.83       312.04 o
   9  14   1        358.72        137.89       147.14 o
  10  14   1         58.64        365.35       205.38 o
  11  14   1        316.81        512.94       242.00 o
 -10  15   1        118.00         12.86       168.41 o
  -9  15   1        293.97         20.90       161.20 o
  -8  15   1        213.58         53.46       152.75 o
  -7  15   1        454.40        465.96       212.68 o
  -6  15   1       1799.12       1778.02       371.46 o
  -5  15   1       3157.16       3012.74       483.05 o
  -4  15   1       2745.38       3090.04       488.56 o
  -3  15   1        390.03        342.14       136.69 o
  -2  15   1        218.33        138.23        82.55 o
  -1  15   1       1169.44       1367.23       157.50 o
   0  15   1       1067.12        829.65       153.95 o
   1  15   1       1415.21       1545.74       196.88 o
   2  15   1        189.46        102.90        83.27 o
   3  15   1        384.59        202.30       209.86 o
   4  15   1       2592.76       2738.50       487.29 o
   5  15   1       3346.07       3386.30       511.73 o
   6  15   1       1719.69       2015.35       395.99 o
   7  15   1        384.06        559.21       253.67 o
   8  15   1        251.14        166.82       182.10 o
   9  15   1        291.83         90.45       147.13 o
  10  15   1        169.01        192.53       188.11 o
  -8  16   1        943.33       1188.80       339.43 o
  -7  16   1        958.08        879.15       307.26 o
  -6  16   1        328.94        458.68       237.18 o
  -5  16   1        284.66        916.13       301.89 o
  -4  16   1        522.71        389.46       182.13 o
  -3  16   1        898.81        996.60       217.25 o
  -2  16   1        932.05        996.03       453.27 o
  -1  16   1       1541.03       1751.88       378.03 o
   0  16   1        878.86        550.22       182.37 o
   1  16   1       1242.67       1175.22       412.34 o
   2  16   1        997.19        905.49       209.13 o
   3  16   1        845.23        619.50       171.39 o
   4  16   1        502.18        502.36       257.11 o
   5  16   1        164.87        186.51       179.67 o
   6  16   1        362.20        416.08       234.37 o
   7  16   1        817.33        622.91       265.01 o
   8  16   1       1009.19       1581.38       385.69 o
  -6  17   1        848.34        626.13       269.03 o
  -5  17   1       1433.17       1233.97       277.99 o
  -4  17   1        550.32        348.91       247.47 o
  -3  17   1        391.04        461.53       179.50 o
  -2  17   1        493.34        978.73       229.40 o
  -1  17   1        573.85        765.23       202.56 o
   0  17   1        554.15        541.82       176.11 o
   1  17   1        660.93        887.94       208.60 o
   2  17   1        459.81        851.36       213.55 o
   3  17   1        342.31        374.67       262.91 o
   4  17   1        543.45        420.53       402.26 o
   5  17   1       1394.93       1130.08       231.13 o
   6  17   1       1004.66        643.09       268.66 o
  -4  18   1         40.32        328.20       403.32 o
  -3  18   1         76.97        182.17       218.25 o
  -2  18   1        824.58       1159.41       252.80 o
  -1  18   1         14.63         68.01       144.51 o
   0  18   1        686.86       1107.11       250.45 o
   1  18   1         31.93        -40.23       202.77 o
   2  18   1        776.01       1018.60       260.57 o
   3  18   1         60.53         95.24       126.17 o
   4  18   1         31.29         47.75       247.38 o
   2   0   2       3176.09       1015.27        58.20 o
   3   0   2       7402.24       6295.72       128.86 o
   4   0   2      52465.40      29850.53       352.23 o
   5   0   2      30116.81      30929.28       936.87 o
   6   0   2      18094.58      25526.77       762.98 o
   7   0   2      18195.82      14947.39       631.37 o
   8   0   2        791.57        871.03       119.06 o
   9   0   2       9528.34       9249.43       368.72 o
  10   0   2      11155.72      13489.80       473.61 o
  11   0   2       1773.90       1781.65       187.88 o
  12   0   2       1128.83       1051.78       150.69 o
  13   0   2       2375.22       2378.49       228.66 o
  14   0   2       4248.84       3681.19       294.16 o
  15   0   2         38.18         21.47       145.49 o
  16   0   2        585.16       2011.15       248.39 o
  17   0   2        291.25        291.46       109.83 o
 -17   1   2       1025.62        889.37       182.36 o
 -16   1   2        485.89        537.96       148.24 o
 -15   1   2        552.41        670.51       153.53 o
 -14   1   2        401.90        306.82       106.68 o
 -13   1   2       3849.33       4668.87       320.46 o
 -12   1   2        303.99        520.65       136.89 o
 -11   1   2      14910.28      14132.92       505.74 o
 -10   1   2       5534.03       4958.61       289.77 o
  -9   1   2        509.90        469.78       111.29 o
  -8   1   2      10087.51      10081.39       506.70 o
  -7   1   2       7144.98       8964.65       781.29 o
  -6   1   2       1832.27       2508.51       117.49 o
  -5   1   2      45762.45      52385.54       848.12 o
  -4   1   2      13565.46      15490.45       236.59 o
  -3   1   2      13348.06      10324.17       304.72 o
  -2   1   2      45419.60      45994.49       421.04 o
  -1   1   2     200271.83     421244.47      6546.09 o
   1   1   2     201714.47     430985.75      7161.74 o
   2   1   2      48064.55      50769.68       612.40 o
   3   1   2      12417.30       9364.08       181.25 o
   4   1   2      15158.12      16618.11       412.52 o
   5   1   2      47358.61      54745.50      1070.05 o
   6   1   2       2407.55       2918.78       125.05 o
   7   1   2       7856.12       9198.90       709.73 o
   8   1   2      10996.88      10801.94       376.30 o
   9   1   2        498.06        605.38       123.31 o
  10   1   2       5607.52       4665.18       498.65 o
  11   1   2      12999.40      12856.74       485.03 o
  12   1   2        225.87        355.54       116.31 o
  13   1   2       3881.91       4565.04       365.77 o
  14   1   2        481.60        356.90       116.36 o
  15   1   2        650.20        643.74       147.56 o
  16   1   2        607.79        794.37       174.91 o
  17   1   2       1279.50       1123.97       195.23 o
 -17   2   2        184.90        114.29        98.50 o
 -16   2   2        102.91        187.17       102.11 o
 -15   2   2        559.87        480.25       130.42 o
 -14   2   2       1189.67        716.31       142.73 o
 -13   2   2       2494.68       2402.75       239.78 o
 -12   2   2        689.14        992.16       152.78 o
 -11   2   2       2019.05       1577.92       181.03 o
 -10   2   2      17898.11      17232.49       534.14 o
  -9   2   2      28002.66      26325.48       632.80 o
  -8   2   2       4817.04       4057.24       431.22 o
  -7   2   2       8793.85       7933.68       313.95 o
  -6   2   2       6201.76       6159.13       183.69 o
  -5   2   2      15725.07      14449.66       259.00 o
  -4   2   2      22378.74      22073.59       471.97 o
  -3   2   2     110017.88      94269.94      2200.29 o
  -2   2   2      41659.03      41853.56       506.41 o
  -1   2   2       9111.93       8159.02       160.49 o
   0   2   2       2405.72        538.12        58.93 o
   1   2   2       9197.88       8211.71       158.92 o
   2   2   2      36681.62      36768.94       638.21 o
   3   2   2     112572.93      97933.34      1766.89 o
   4   2   2      19341.05      19079.66       272.40 o
   5   2   2      18097.24      16548.56       337.84 o
   6   2   2       6738.08       6617.48       216.22 o
   7   2   2       9283.46       8919.58       332.06 o
   8   2   2       3842.23       3312.26       217.67 o
   9   2   2      29059.22      27782.79       651.51 o
  10   2   2      17706.09      16879.76       536.91 o
  11   2   2       2255.25       1996.29       200.89 o
  12   2   2        845.22       1007.79       153.32 o
  13   2   2       2183.78       2109.98       227.23 o
  14   2   2       1421.63        643.18       141.27 o
  15   2   2        337.47        393.61       126.07 o
  16   2   2         71.47        103.42        92.63 o
  17   2   2        138.48        183.67       116.68 o
 -17   3   2        615.18        755.56       168.12 o
 -16   3   2       1559.67       1601.95       223.10 o
 -15   3   2       1893.07       1449.08       204.57 o
 -14   3   2        224.32        258.06       119.18 o
 -13   3   2       2648.83       3094.47       267.02 o
 -12   3   2       4594.29       5257.02       333.19 o
 -11   3   2        271.12        369.26       101.22 o
 -10   3   2        360.38        487.72       146.35 o
  -9   3   2       8194.57       7525.55       455.31 o
  -8   3   2       5707.89       4898.72       268.01 o
  -7   3   2      22595.28      22068.11      1259.72 o
  -6   3   2       5932.42       6024.77       260.82 o
  -5   3   2       9313.17       9498.29       257.03 o
  -4   3   2       8902.20       8987.64       238.49 o
  -3   3   2      21188.38      19068.86       406.27 o
  -2   3   2     247382.47     388793.25      3517.80 o
  -1   3   2       4132.96       3678.39        93.86 o
   0   3   2       6960.70       7244.15       202.60 o
   1   3   2       2657.91       3315.44       128.71 o
   2   3   2     261712.53     417280.97      2313.21 o
   3   3   2      21154.25      19125.12      1272.32 o
   4   3   2       7751.76       8323.57       231.33 o
   5   3   2       8986.44       9390.50       305.91 o
   6   3   2       5690.33       5741.46       256.61 o
   7   3   2      23315.19      21983.94      1185.15 o
   8   3   2       5446.22       4726.25       265.32 o
   9   3   2       7946.90       7416.71       340.43 o
  10   3   2        409.83        600.18       128.65 o
  11   3   2        357.10        425.80       109.43 o
  12   3   2       5095.30       5716.19       413.08 o
  13   3   2       2880.79       2671.43       250.13 o
  14   3   2        270.24        277.68       114.97 o
  15   3   2       1266.77       1292.05       198.41 o
  16   3   2       1537.01       1531.87       220.47 o
  17   3   2        874.72       1042.84       194.03 o
 -17   4   2        298.51        230.26       119.96 o
 -16   4   2        532.68        309.18       121.21 o
 -15   4   2        271.91        663.87       157.42 o
 -14   4   2       1125.77       1054.70       177.20 o
 -13   4   2       3873.63       4223.32       310.92 o
 -12   4   2       4977.17       4271.56       301.00 o
 -11   4   2       3235.26       2573.28       337.86 o
 -10   4   2       2926.08       2906.75       299.54 o
  -9   4   2        544.58        496.22       119.57 o
  -8   4   2       1855.10       2045.25       262.66 o
  -7   4   2      18560.54      18717.25       722.62 o
  -6   4   2        415.28        355.92       130.70 o
  -5   4   2       6829.07       7741.41       292.69 o
  -4   4   2      19117.74      19802.67       479.01 o
  -3   4   2       7200.67       5604.58       250.82 o
  -2   4   2      11515.26       8305.30       338.81 o
  -1   4   2      26065.28      24082.30       454.54 o
   0   4   2       5700.55       4383.14       177.22 o
   1   4   2      28319.79      26942.15       428.66 o
   2   4   2      10945.67       7891.37       376.39 o
   3   4   2       8235.39       6794.22       207.20 o
   4   4   2      20167.87      21923.48      1279.79 o
   5   4   2      10264.86      10851.10       598.35 o
   6   4   2        670.76        723.79       158.92 o
   7   4   2      16524.77      16678.37       684.89 o
   8   4   2       2764.93       2833.63       302.08 o
   9   4   2        454.74        316.38       106.69 o
  10   4   2       2835.17       3225.22       270.28 o
  11   4   2       2478.57       2132.70       212.14 o
  12   4   2       4685.99       3876.60       290.24 o
  13   4   2       4156.67       4601.94       325.69 o
  14   4   2        957.51        994.93       176.04 o
  15   4   2        256.57        350.75       132.25 o
  16   4   2        532.82        639.24       163.70 o
  17   4   2        256.05        153.75       102.08 o
 -16   5   2        132.39        412.79       207.80 o
 -15   5   2       1425.81       1936.41       347.21 o
 -14   5   2        693.73        866.17       236.05 o
 -13   5   2       2224.18       2022.89       322.92 o
 -12   5   2       1321.04       1051.40       241.83 o
 -11   5   2       1227.22       1483.14       267.18 o
 -10   5   2        989.44       1160.26       230.93 o
  -9   5   2       2121.10       2553.65       308.18 o
  -8   5   2       3467.38       4381.69       387.04 o
  -7   5   2       8591.01       6364.49       463.75 o
  -6   5   2       8311.07       9345.29       528.36 o
  -5   5   2      12947.46       9787.94       523.83 o
  -4   5   2       9808.73       8514.67       359.59 o
  -3   5   2        820.36        413.06        78.38 o
  -2   5   2       1891.97        779.40       122.18 o
  -1   5   2      20538.42      29494.12       459.05 o
   0   5   2      11100.23      13511.34       713.12 o
   1   5   2      16526.89      24798.46       827.13 o
   2   5   2       1618.99        904.08       130.28 o
   3   5   2        810.64        623.50        62.14 o
   4   5   2       9141.76       8433.84       295.41 o
   5   5   2      11558.55       8160.29       483.41 o
   6   5   2       9338.81      11233.09       576.79 o
   7   5   2       7781.89       6527.96       465.30 o
   8   5   2       3763.28       3603.24       350.84 o
   9   5   2       2195.64       2047.44       281.61 o
  10   5   2       1060.37        978.89       212.44 o
  11   5   2       1041.73       1150.58       236.55 o
  12   5   2       1395.31       1238.19       255.93 o
  13   5   2       1908.61       1637.54       299.89 o
  14   5   2        578.99        588.25       216.32 o
  15   5   2       1985.13       2821.08       406.52 o
  16   5   2        175.12        592.48       225.09 o
 -16   6   2       1420.76       1523.11       317.01 o
 -15   6   2        304.73        213.46       160.80 o
 -14   6   2        261.96        400.38       195.36 o
 -13   6   2        361.64        359.01       179.70 o
 -12   6   2        188.94        322.78       161.99 o
 -11   6   2        849.61        764.62       211.16 o
 -10   6   2       2695.59       2661.62       345.35 o
  -9   6   2        586.12       1466.66       256.17 o
  -8   6   2       1712.15       2114.13       288.33 o
  -7   6   2       6342.41       5700.80       448.81 o
  -6   6   2       7981.90       7835.49       505.74 o
  -5   6   2       4566.61       5648.97       224.24 o
  -4   6   2      14279.28      17447.03       754.55 o
  -3   6   2      20999.99      20205.53      1045.84 o
  -2   6   2      35185.89      38635.35       493.90 o
  -1   6   2      33150.93      41341.61       864.80 o
   0   6   2      11571.29       9928.90       258.70 o
   1   6   2      35166.44      43156.64       817.62 o
   2   6   2      40157.79      43257.02       523.04 o
   3   6   2      18803.77      19786.88       441.78 o
   4   6   2      15759.91      19438.82       488.25 o
   5   6   2       4579.97       5750.01       326.92 o
   6   6   2       7673.66       7389.30       492.94 o
   7   6   2       6294.07       5843.84       455.26 o
   8   6   2       1943.33       1843.20       269.47 o
   9   6   2       1091.91       1998.97       301.78 o
  10   6   2       2247.01       2094.93       310.96 o
  11   6   2        752.46        913.76       222.81 o
  12   6   2        221.67        275.36       153.96 o
  13   6   2        301.57        412.45       180.90 o
  14   6   2        358.53        519.81       204.63 o
  15   6   2        335.57        235.57       172.46 o
  16   6   2       1226.83       1290.81       298.47 o
 -16   7   2        214.60        160.79       169.23 o
 -15   7   2       1195.15       1140.37       293.24 o
 -14   7   2        573.21        231.19       151.18 o
 -13   7   2       1010.17       1151.97       276.73 o
 -12   7   2       1782.51       1475.18       289.00 o
 -11   7   2       4043.79       3357.86       398.10 o
 -10   7   2       2495.67       2063.42       323.49 o
  -9   7   2       2481.91       2792.99       346.91 o
  -8   7   2       1680.41       1844.48       300.77 o
  -7   7   2       1709.43       2301.45       298.00 o
  -6   7   2       3387.77       3109.58       185.84 o
  -5   7   2      27748.54      22592.57       674.53 o
  -4   7   2       3589.75       3294.83       351.86 o
  -3   7   2       2375.41       2428.65       173.50 o
  -2   7   2      14527.50      12256.78       333.38 o
  -1   7   2      18269.55      23664.85       850.32 o
   0   7   2       1477.42       1067.22       107.92 o
   1   7   2      16272.04      24320.59       786.60 o
   2   7   2      16389.78      14262.67       364.24 o
   3   7   2       2117.27       2259.96       134.54 o
   4   7   2       3035.02       3498.98       411.70 o
   5   7   2      29991.50      24748.45       594.65 o
   6   7   2       4977.36       4544.60       250.52 o
   7   7   2       1278.84       1321.82       229.43 o
   8   7   2       1572.86       1936.05       308.38 o
   9   7   2       2644.49       2737.44       343.34 o
  10   7   2       2227.93       1880.05       304.48 o
  11   7   2       4643.87       3874.99       425.76 o
  12   7   2       1557.66       1181.93       257.15 o
  13   7   2       1395.16       1670.95       313.83 o
  14   7   2        435.36         76.79       119.00 o
  15   7   2        945.93       1009.46       254.58 o
  16   7   2        173.88        248.41       157.16 o
 -15   8   2        165.73        -39.79       153.95 o
 -14   8   2         91.52        543.01       212.22 o
 -13   8   2       1533.68       1843.30       333.97 o
 -12   8   2        239.51        147.53       145.92 o
 -11   8   2       2994.97       3169.49       416.64 o
 -10   8   2        713.46        534.08       180.17 o
  -9   8   2       1215.69       1245.76       257.92 o
  -8   8   2       6476.77       5257.35       488.72 o
  -7   8   2       8313.02       8140.62       862.99 o
  -6   8   2       2038.46       1205.07       144.22 o
  -5   8   2       2093.12       2532.49       341.69 o
  -4   8   2       3704.42       3581.80       243.26 o
  -3   8   2       1131.97       1609.97       130.84 o
  -2   8   2        313.61        384.42        80.89 o
  -1   8   2       1994.32       1602.30       175.71 o
   0   8   2      22544.29      23987.46       465.44 o
   1   8   2       1164.27        902.66       125.37 o
   2   8   2        526.17        283.06       117.10 o
   3   8   2       1469.93       1924.01       134.82 o
   4   8   2       3897.52       3650.19       257.29 o
   5   8   2       1762.96       2698.55       226.45 o
   6   8   2       1755.83       1429.11       183.04 o
   7   8   2       9128.97       8725.54       513.86 o
   8   8   2       5961.51       5020.89       471.48 o
   9   8   2       1149.99       1180.90       252.68 o
  10   8   2        800.76        649.95       198.69 o
  11   8   2       3350.48       3334.50       414.75 o
  12   8   2        142.46        -62.70       119.78 o
  13   8   2       1652.31       1818.92       327.57 o
  14   8   2        113.53        256.03       171.23 o
  15   8   2        159.42        116.16       165.20 o
 -15   9   2        252.65         52.26       129.44 o
 -14   9   2        495.91        443.46       205.04 o
 -13   9   2         89.87        164.39       132.64 o
 -12   9   2        935.21        923.05       243.33 o
 -11   9   2       4312.35       4608.09       508.60 o
 -10   9   2       2574.40       2472.41       368.57 o
  -9   9   2        903.77       1355.54       294.44 o
  -8   9   2       2593.58       1942.96       185.67 o
  -7   9   2      12391.00      10200.50       814.77 o
  -6   9   2       1456.29       1649.20       293.85 o
  -5   9   2       6177.86       7036.07       558.52 o
  -4   9   2       1697.93       1575.16       469.97 o
  -3   9   2       3241.44       3505.72       197.30 o
  -2   9   2       8219.88       9539.59       342.45 o
  -1   9   2       6203.50       5095.39       250.05 o
   0   9   2       3014.74       3169.65       179.21 o
   1   9   2       6188.59       5710.21       232.98 o
   2   9   2       9498.97      10486.90       360.73 o
   3   9   2       3950.26       4312.56       209.57 o
   4   9   2       1458.38       1162.31       232.30 o
   5   9   2       7006.11       8132.73       599.95 o
   6   9   2       1480.11       1833.92       196.18 o
   7   9   2      10794.79       9239.92       584.30 o
   8   9   2       2060.44       1405.87       229.54 o
   9   9   2        923.21       1042.62       255.83 o
  10   9   2       2828.92       2068.45       345.68 o
  11   9   2       3638.27       3852.93       464.79 o
  12   9   2        816.17        694.94       218.37 o
  13   9   2         48.44       -124.59       158.76 o
  14   9   2        479.33        598.64       236.80 o
  15   9   2        322.09         39.80       142.31 o
 -14  10   2        295.87        572.43       241.19 o
 -13  10   2        835.05       1073.33       279.89 o
 -12  10   2       1097.26       1117.02       285.99 o
 -11  10   2       3018.08       3179.43       437.92 o
 -10  10   2       5385.81       4889.68       531.68 o
  -9  10   2        972.77        777.94       236.52 o
  -8  10   2       2905.48       2732.58       390.08 o
  -7  10   2        986.13       1282.49       296.08 o
  -6  10   2       1167.14       1595.83       300.17 o
  -5  10   2       6079.70       4942.26       498.72 o
  -4  10   2       6617.07       6654.37       378.37 o
  -3  10   2       1469.63       1863.15       162.91 o
  -2  10   2       6519.79       6108.59       383.88 o
  -1  10   2        308.72        469.57        83.30 o
   0  10   2        799.65        997.77       190.39 o
   1  10   2        387.46        463.38        93.73 o
   2  10   2       5396.13       5025.45       348.20 o
   3  10   2       1615.98       1928.98       193.07 o
   4  10   2       7136.76       7481.84       621.33 o
   5  10   2       5571.64       4251.19       463.69 o
   6  10   2       1450.75       1970.61       334.07 o
   7  10   2        796.92       1073.02       411.26 o
   8  10   2       2794.33       3230.74       414.62 o
   9  10   2        775.85        431.13       193.05 o
  10  10   2       5039.60       3905.14       470.99 o
  11  10   2       2744.70       3077.65       435.41 o
  12  10   2        939.88        875.17       250.97 o
  13  10   2        671.13       1008.47       275.44 o
  14  10   2        235.53        445.79       231.13 o
 -14  11   2        148.98        253.23       176.86 o
 -13  11   2       1306.29       1147.28       278.78 o
 -12  11   2       2035.31       2316.81       392.44 o
 -11  11   2        151.40        453.00       210.22 o
 -10  11   2       3600.57       5057.18       549.77 o
  -9  11   2       2209.53       2483.11       386.54 o
  -8  11   2       1799.25       1642.34       334.91 o
  -7  11   2       1613.26       1287.58       305.09 o
  -6  11   2         70.06        293.41       170.02 o
  -5  11   2        491.98        235.63       157.62 o
  -4  11   2       2307.47       2235.79       373.84 o
  -3  11   2       4860.70       4424.80       248.51 o
  -2  11   2       7333.97       7700.88       549.02 o
  -1  11   2      10602.55      11268.15       390.62 o
   0  11   2        488.14        653.09        89.63 o
   1  11   2      11485.60      12337.11       373.96 o
   2  11   2       6596.43       6440.19       441.34 o
   3  11   2       5055.15       4432.32       289.74 o
   4  11   2       2253.86       2366.98       373.01 o
   5  11   2        398.86        322.86       176.51 o
   6  11   2         91.12        315.12       184.09 o
   7  11   2       1357.09       1083.26       282.08 o
   8  11   2       1926.67       2035.84       363.53 o
   9  11   2       2809.16       3474.54       454.41 o
  10  11   2       3283.40       4854.43       535.53 o
  11  11   2         79.14        321.14       198.95 o
  12  11   2       2225.64       2912.52       437.58 o
  13  11   2       1332.80       1210.46       303.32 o
  14  11   2        143.36        195.34       172.03 o
 -13  12   2        116.16         41.80       139.87 o
 -12  12   2        262.04        642.76       250.43 o
 -11  12   2        278.21        485.60       229.53 o
 -10  12   2       1794.79       2114.10       396.82 o
  -9  12   2       2428.48       1914.75       358.79 o
  -8  12   2       1350.56       1643.61       329.12 o
  -7  12   2       1304.22       1660.52       327.92 o
  -6  12   2       2027.17       2011.13       350.29 o
  -5  12   2        878.21        852.32       240.53 o
  -4  12   2       1038.15        683.10       234.94 o
  -3  12   2      10447.95      12583.89       540.42 o
  -2  12   2       1780.56       1446.67       236.80 o
  -1  12   2       3090.46       3373.40       208.13 o
   0  12   2       7204.92       9136.73       336.90 o
   1  12   2       3546.53       3828.85       219.49 o
   2  12   2       1607.57       1245.98       132.56 o
   3  12   2      10592.88      12411.80       597.83 o
   4  12   2        901.75        720.83       238.93 o
   5  12   2        906.70        663.69       213.59 o
   6  12   2       2492.58       2324.53       372.58 o
   7  12   2       1414.70       1801.51       329.16 o
   8  12   2       1239.54       1406.90       303.75 o
   9  12   2       2096.50       1933.97       370.37 o
  10  12   2       1728.29       1711.96       355.75 o
  11  12   2        267.32        475.14       229.53 o
  12  12   2        378.85        576.08       234.78 o
  13  12   2         91.76         -6.43       140.68 o
 -12  13   2        408.64        360.21       209.85 o
 -11  13   2        496.63        549.60       242.84 o
 -10  13   2        163.90         42.21       147.52 o
  -9  13   2        345.09        544.72       203.42 o
  -8  13   2        368.42        522.63       220.71 o
  -7  13   2        288.85        399.99       229.94 o
  -6  13   2       1648.19       1688.72       345.31 o
  -5  13   2        620.38        432.28       187.39 o
  -4  13   2       1020.37        999.24       170.41 o
  -3  13   2        370.33        532.99       133.20 o
  -2  13   2        687.70        823.45       147.25 o
  -1  13   2        287.91        242.40        67.60 o
   0  13   2       1564.80       2180.73       176.22 o
   1  13   2        411.76        381.58        85.60 o
   2  13   2        485.55        275.00        70.94 o
   3  13   2        577.21        821.67       177.94 o
   4  13   2       1154.78        707.67       267.54 o
   5  13   2        665.34        641.41       237.26 o
   6  13   2       1318.13       1396.55       322.68 o
   7  13   2        246.45        348.92       213.05 o
   8  13   2        342.57        632.77       225.13 o
   9  13   2        284.50        218.68       147.13 o
  10  13   2        115.70        196.15       186.50 o
  11  13   2        572.07        544.40       227.17 o
  12  13   2        395.88        408.85       224.73 o
 -11  14   2        379.30        376.68       233.97 o
 -10  14   2         93.30        112.54       142.28 o
  -9  14   2         51.10       -155.94       163.98 o
  -8  14   2        271.65        350.53       214.66 o
  -7  14   2        490.65        632.44       253.30 o
  -6  14   2        175.43        185.30       181.69 o
  -5  14   2         19.94         59.08       145.89 o
  -4  14   2        510.64        643.32       262.55 o
  -3  14   2       6632.68       5011.70       471.11 o
  -2  14   2         45.50         42.65        64.31 o
  -1  14   2        118.52        116.02        61.79 o
   0  14   2         18.06        109.56        73.48 o
   1  14   2         83.20         66.83        85.97 o
   2  14   2         58.02         59.37        70.72 o
   3  14   2       6171.77       5082.17       475.43 o
   4  14   2        529.57        727.77       273.82 o
   5  14   2         19.26        -40.59       159.16 o
   6  14   2        222.91        517.34       230.73 o
   7  14   2        565.42        563.31       232.00 o
   8  14   2        199.86        403.97       239.17 o
   9  14   2         76.96       -200.16       200.16 o
  10  14   2        130.80        218.66       165.20 o
  11  14   2        344.40        390.34       225.12 o
 -10  15   2         46.94        262.45       171.62 o
  -9  15   2        663.09        554.88       242.06 o
  -8  15   2        375.76        427.74       246.03 o
  -7  15   2         88.83        -48.23       166.80 o
  -6  15   2        489.51        419.34       213.89 o
  -5  15   2        770.22        863.80       279.09 o
  -4  15   2        933.21        992.63       306.07 o
  -3  15   2       3104.82       3488.73       681.50 o
  -2  15   2       1385.94       1530.82       251.07 o
  -1  15   2        609.84        842.88       125.02 o
   0  15   2       1139.21       1360.12       202.25 o
   1  15   2        620.93        663.25       133.92 o
   2  15   2       1227.53       1324.40       181.54 o
   3  15   2       3111.57       3067.53       391.31 o
   4  15   2        892.55       1159.10       323.76 o
   5  15   2        627.02        591.89       230.00 o
   6  15   2        413.89        579.73       227.15 o
   7  15   2         55.02         81.59       172.42 o
   8  15   2        319.93        467.52       237.98 o
   9  15   2        662.55        848.81       274.23 o
  10  15   2         53.94        -71.14       180.06 o
  -8  16   2         89.06        250.00       208.20 o
  -7  16   2        638.25        743.45       290.31 o
  -6  16   2       2568.00       2636.92       467.07 o
  -5  16   2         12.40        106.91       178.05 o
  -4  16   2       1190.18       1120.24       462.20 o
  -3  16   2        201.71        190.97       291.42 o
  -2  16   2       2108.73       2061.00       294.31 o
  -1  16   2        726.20        613.39       174.11 o
   0  16   2         22.54        265.66       138.91 o
   1  16   2        649.18        473.37       151.08 o
   2  16   2       2305.47       2182.03       299.05 o
   3  16   2        168.02        106.49       262.68 o
   4  16   2       1313.08       1369.95       303.53 o
   5  16   2          8.07       -101.28       180.05 o
   6  16   2       2493.88       2891.64       494.42 o
   7  16   2        667.32        675.92       269.40 o
   8  16   2         72.00         55.47       137.86 o
  -6  17   2       1182.16       1769.01       398.21 o
  -5  17   2        556.47        265.80       168.87 o
  -4  17   2        294.64        272.91       285.01 o
  -3  17   2        265.88        202.47       276.96 o
  -2  17   2        224.14        199.79       185.31 o
  -1  17   2        189.93        524.58       178.83 o
   0  17   2        464.89        563.36       203.01 o
   1  17   2        122.45        223.94       130.74 o
   2  17   2        287.59        295.97       161.20 o
   3  17   2        219.14        251.52       137.47 o
   4  17   2        350.81        413.77       485.22 o
   5  17   2        518.36        303.46       136.88 o
   6  17   2       1229.23       2036.56       435.23 o
  -4  18   2        275.17        345.77       458.06 o
  -3  18   2         59.82        172.64       334.00 o
  -2  18   2        150.08          8.13       143.39 o
  -1  18   2       1065.39       1379.47       438.60 o
   0  18   2        112.30        206.62       150.91 o
   1  18   2       1091.44       1246.39       258.50 o
   2  18   2        165.04        263.00       148.77 o
   3  18   2         36.99        217.48       147.58 o
   4  18   2        329.85        251.05       290.04 o
   2   0   3      96499.16     108433.30      1619.41 o
   3   0   3        114.09        111.19        26.85 o
   4   0   3      11126.00      10016.05       187.68 o
   5   0   3        820.17       1189.11        85.24 o
   6   0   3       2610.62       3951.81       265.55 o
   7   0   3      18872.25      16217.16       493.33 o
   8   0   3        128.63        854.18       115.53 o
   9   0   3         49.50        169.75        81.06 o
  10   0   3       3463.84       5441.22       299.52 o
  11   0   3       1991.28       2401.14       213.72 o
  12   0   3         88.52         66.46        70.99 o
  13   0   3        164.41        353.92       114.46 o
  14   0   3        194.24        291.32       107.23 o
  15   0   3         54.03         56.33        86.38 o
  16   0   3       3279.91       4219.01       340.98 o
  17   0   3        144.07        198.25       115.98 o
 -17   1   3       1160.49        837.12       191.68 o
 -16   1   3       1367.38       1733.21       228.19 o
 -15   1   3        113.30         66.43        91.38 o
 -14   1   3        920.55        870.03       155.46 o
 -13   1   3       1443.63       1520.08       203.66 o
 -12   1   3       5066.32       4800.56       472.87 o
 -11   1   3      10467.57       8213.58       499.40 o
 -10   1   3       9497.62       9842.99       403.64 o
  -9   1   3       5227.81       4488.17       262.91 o
  -8   1   3       3713.46       3313.30       213.80 o
  -7   1   3      12391.11      14511.00       408.51 o
  -6   1   3      24166.83      24513.23       360.36 o
  -5   1   3      11360.23      17239.57       279.58 o
  -4   1   3       3119.47       3285.01       109.84 o
  -3   1   3      28752.84      33158.48       685.74 o
  -2   1   3       1950.80       1842.33        62.54 o
  -1   1   3      12076.53      12203.92       296.01 o
   0   1   3        279.10       1269.28        66.42 o
   1   1   3      11156.59      11710.25       185.63 o
   2   1   3       1211.92       1065.31        77.29 o
   3   1   3      26555.72      31245.17       297.62 o
   4   1   3       2137.33       2428.81       118.77 o
   5   1   3      14174.02      21440.94       312.76 o
   6   1   3      22842.79      23295.22       459.93 o
   7   1   3      11543.37      13368.55       393.70 o
   8   1   3       2905.82       2627.81       193.73 o
   9   1   3       6183.01       5230.46       314.45 o
  10   1   3      10634.96      11399.95       433.85 o
  11   1   3      12325.87      10174.97       585.78 o
  12   1   3       5161.57       4234.32       453.93 o
  13   1   3       1461.45       1138.91       182.12 o
  14   1   3        764.14        714.74       145.51 o
  15   1   3        176.79         78.49        89.44 o
  16   1   3       1584.05       1930.67       240.43 o
  17   1   3       1164.23        943.95       194.59 o
 -17   2   3        383.62        768.48       176.13 o
 -16   2   3        369.80        249.09       117.11 o
 -15   2   3       3008.90       3440.44       300.69 o
 -14   2   3        924.63        891.01       167.79 o
 -13   2   3       1081.40       1459.87       189.76 o
 -12   2   3       1473.90       1532.29       185.36 o
 -11   2   3        589.98        607.66       150.20 o
 -10   2   3       4677.64       5145.94       395.69 o
  -9   2   3       3866.63       4642.20       282.59 o
  -8   2   3        259.42        500.58       103.76 o
  -7   2   3       2760.04       2392.55       185.34 o
  -6   2   3      15863.92      15799.71       463.60 o
  -5   2   3      44330.66      48440.74       488.37 o
  -4   2   3      48256.24      36787.16       718.89 o
  -3   2   3      33966.14      39267.94       423.32 o
  -2   2   3      69788.43      49776.48       576.68 o
  -1   2   3      61895.44      69780.94       732.63 o
   0   2   3     126191.81     150879.39      1532.07 o
   1   2   3      60349.26      67660.10       482.94 o
   2   2   3      67730.16      45004.98      3889.25 o
   3   2   3      42191.00      46322.16       760.60 o
   4   2   3      49099.73      38708.04       535.60 o
   5   2   3      46509.88      50920.04       640.10 o
   6   2   3      12342.14      12766.50       384.31 o
   7   2   3       2124.08       2029.33       174.97 o
   8   2   3        316.62        466.68       101.07 o
   9   2   3       3447.57       4369.03       355.76 o
  10   2   3       4092.93       4587.54       280.16 o
  11   2   3        451.93        537.38       123.40 o
  12   2   3       1429.66       1577.68       189.05 o
  13   2   3        998.22       1348.32       183.74 o
  14   2   3        813.64        818.07       164.62 o
  15   2   3       2798.07       3092.36       284.79 o
  16   2   3        425.72        376.16       130.46 o
  17   2   3        527.19        768.99       174.92 o
 -17   3   3         37.95         31.09        85.06 o
 -16   3   3        247.54        419.64       126.42 o
 -15   3   3        386.41        532.40       143.84 o
 -14   3   3       1929.32       1550.65       210.57 o
 -13   3   3       3738.76       3678.76       298.29 o
 -12   3   3       3421.14       3531.49       279.53 o
 -11   3   3       1326.10       1311.20       170.00 o
 -10   3   3       2132.34       1756.74       262.04 o
  -9   3   3       2445.18       2040.24       193.05 o
  -8   3   3       3204.13       2621.62       202.90 o
  -7   3   3      34868.18      30585.32       637.57 o
  -6   3   3       3595.04       5021.68       240.05 o
  -5   3   3       4369.42       8247.79       399.82 o
  -4   3   3      46388.81      48111.76       549.50 o
  -3   3   3       3789.13       2661.48       155.21 o
  -2   3   3      68153.29      67846.39      2860.76 o
  -1   3   3       5632.16       8450.02       219.23 o
   0   3   3       9854.72       6306.01       495.66 o
   1   3   3       6568.55       9635.61       217.44 o
   2   3   3      63317.47      60724.31       951.45 o
   3   3   3       3264.02       2315.31       145.52 o
   4   3   3      43735.60      45418.44      1369.82 o
   5   3   3       2869.88       6340.13       382.76 o
   6   3   3       4945.42       6429.17       272.10 o
   7   3   3      35164.30      30728.78       963.27 o
   8   3   3       3577.98       2839.44       209.57 o
   9   3   3       2610.40       2101.56       193.07 o
  10   3   3       2616.11       2285.38       210.30 o
  11   3   3       1596.09       1421.59       177.17 o
  12   3   3       2533.64       2810.49       252.99 o
  13   3   3       3538.91       3425.44       288.64 o
  14   3   3       2118.25       1747.73       216.77 o
  15   3   3        532.16        886.73       201.44 o
  16   3   3        125.95         67.18        93.66 o
  17   3   3         38.95         -9.37        91.04 o
 -17   4   3        710.69        812.82       175.49 o
 -16   4   3        706.01        281.08       119.59 o
 -15   4   3        130.20        185.65       170.02 o
 -14   4   3        407.58        459.15       138.87 o
 -13   4   3       1015.65        783.43       190.87 o
 -12   4   3        357.48        305.42       110.69 o
 -11   4   3        795.54       1317.99       184.23 o
 -10   4   3       2194.16       1637.56       189.07 o
  -9   4   3       2275.58       2237.92       202.65 o
  -8   4   3       7523.97       7571.11       481.56 o
  -7   4   3       2306.11       2582.06       278.20 o
  -6   4   3       5235.28       5018.41       372.35 o
  -5   4   3      19168.87      24761.95       824.95 o
  -4   4   3      11454.58      11443.89       365.26 o
  -3   4   3      57390.54      62827.34      1507.83 o
  -2   4   3      20790.09      24705.83       390.62 o
  -1   4   3      79760.28      80244.75      1003.34 o
   0   4   3       2984.58       1589.22       138.47 o
   1   4   3      83501.73      87834.84       836.70 o
   2   4   3      26100.19      30689.78       632.57 o
   3   4   3      53628.19      56515.21      1039.70 o
   4   4   3       9651.62      10349.86       346.59 o
   5   4   3      21635.16      27044.27       459.74 o
   6   4   3       6226.58       5765.37       399.29 o
   7   4   3       2225.39       2945.01       298.33 o
   8   4   3       7633.64       7081.99       471.89 o
   9   4   3       2588.62       2249.95       201.43 o
  10   4   3       2195.92       1832.91       197.90 o
  11   4   3        876.04       1378.60       187.71 o
  12   4   3        364.48        456.45       125.14 o
  13   4   3       1056.97       1063.05       282.19 o
  14   4   3        392.09        322.30       131.26 o
  15   4   3        110.51        162.53       108.06 o
  16   4   3        551.40        357.44       139.91 o
  17   4   3        732.45        768.09       175.44 o
 -16   5   3        777.46        650.64       230.42 o
 -15   5   3        607.47        941.28       250.10 o
 -14   5   3       1238.56       1117.97       264.31 o
 -13   5   3       1136.27       1627.23       295.68 o
 -12   5   3       1848.58       2014.41       313.59 o
 -11   5   3       4224.01       3209.92       372.04 o
 -10   5   3       1193.69       1141.19       243.85 o
  -9   5   3       3272.59       2339.86       298.89 o
  -8   5   3       3177.90       2632.03       315.89 o
  -7   5   3      45957.23      47168.38      1216.19 o
  -6   5   3       9608.06      11222.44       593.68 o
  -5   5   3       5594.74       7521.90       459.83 o
  -4   5   3      25821.62      23042.32      1483.86 o
  -3   5   3        486.38        838.72       121.10 o
  -2   5   3      72172.03      63998.75      1231.64 o
  -1   5   3      21859.44      25092.89       662.40 o
   0   5   3       8915.95       8456.78       713.06 o
   1   5   3      25982.56      28209.18       495.33 o
   2   5   3      72321.45      66589.70       950.69 o
   3   5   3        822.53        924.49        80.32 o
   4   5   3      23690.63      21757.40       654.13 o
   5   5   3       6383.65       7840.61       476.64 o
   6   5   3      11176.41      12854.99       608.88 o
   7   5   3      43912.28      45416.29      1193.31 o
   8   5   3       3396.85       2624.64       312.34 o
   9   5   3       3663.34       2719.37       318.79 o
  10   5   3       1428.93       1229.61       240.69 o
  11   5   3       3547.82       2556.22       337.93 o
  12   5   3       1574.12       1400.57       272.47 o
  13   5   3        888.54       1211.83       256.60 o
  14   5   3       1089.46        833.05       243.76 o
  15   5   3        469.29        748.61       243.64 o
  16   5   3        825.73        902.40       255.76 o
 -16   6   3        622.57        581.81       224.76 o
 -15   6   3        382.16        763.03       225.93 o
 -14   6   3       1021.52       1242.05       285.58 o
 -13   6   3       2177.46       2042.46       322.09 o
 -12   6   3       1061.42        689.90       203.95 o
 -11   6   3        326.56        625.55       202.62 o
 -10   6   3         77.99        241.56       157.96 o
  -9   6   3        568.17        782.17       203.08 o
  -8   6   3      11132.92      11805.79       654.84 o
  -7   6   3       3076.59       4041.19       380.03 o
  -6   6   3       3630.27       3781.78       364.69 o
  -5   6   3      21258.81      17710.38       806.09 o
  -4   6   3       8405.04       8705.14       517.60 o
  -3   6   3      15333.52      16287.32      2309.68 o
  -2   6   3       9220.79       8558.93       341.95 o
  -1   6   3      25424.55      25088.61       367.84 o
   0   6   3        918.98        990.01        90.02 o
   1   6   3      29838.40      29274.23      1043.84 o
   2   6   3      10840.19       9927.39       446.90 o
   3   6   3      14093.37      15386.95       847.80 o
   4   6   3       9498.98      10087.74       705.72 o
   5   6   3      24070.18      21342.74       526.60 o
   6   6   3       4872.21       4912.23       411.81 o
   7   6   3       3927.46       4199.28       388.51 o
   8   6   3      10106.70      10067.43       609.37 o
   9   6   3        541.79        463.26       164.47 o
  10   6   3        116.34        553.89       194.54 o
  11   6   3        257.13        364.61       172.46 o
  12   6   3       1093.93        970.31       238.55 o
  13   6   3       2073.75       2000.82       324.88 o
  14   6   3        902.61        925.02       253.37 o
  15   6   3        280.18        826.08       245.61 o
  16   6   3        730.32        595.52       223.97 o
 -16   7   3        249.07        250.83       160.79 o
 -15   7   3       1524.75       1785.19       350.44 o
 -14   7   3        387.50        168.45       134.28 o
 -13   7   3         29.78        279.73       168.40 o
 -12   7   3       2151.43       2323.16       354.71 o
 -11   7   3       2629.87       2711.93       373.03 o
 -10   7   3       4176.93       4252.77       441.01 o
  -9   7   3        377.76        162.83       126.25 o
  -8   7   3      20574.69      19068.16       870.81 o
  -7   7   3       1734.94       1525.08       260.96 o
  -6   7   3        757.12       1013.73       101.23 o
  -5   7   3       2249.79       3868.77       207.12 o
  -4   7   3      14008.35      12910.82       666.49 o
  -3   7   3      19406.76      19382.12      1051.28 o
  -2   7   3      20643.15      22732.63       499.91 o
  -1   7   3        770.96        629.52       269.62 o
   0   7   3       3103.47       2469.09       143.18 o
   1   7   3        678.30        622.33       211.84 o
   2   7   3      21507.64      23533.96      1136.93 o
   3   7   3      18361.58      18410.12       350.20 o
   4   7   3      15364.14      15119.31       403.07 o
   5   7   3       1601.61       3382.37       228.65 o
   6   7   3       1200.96       1327.78       141.27 o
   7   7   3       1363.42       1168.98       227.84 o
   8   7   3      20633.32      18978.54       863.05 o
   9   7   3        442.26        577.39       186.16 o
  10   7   3       4515.51       4589.93       461.74 o
  11   7   3       2492.18       3178.44       396.75 o
  12   7   3       2137.26       2251.46       345.45 o
  13   7   3         21.90         74.35       123.79 o
  14   7   3        690.68        675.15       233.23 o
  15   7   3       1360.49       1227.80       302.12 o
  16   7   3        216.13        502.86       221.88 o
 -15   8   3        195.85        263.69       181.69 o
 -14   8   3        159.93         48.23       137.47 o
 -13   8   3        443.17        578.14       220.32 o
 -12   8   3        145.74        249.61       165.20 o
 -11   8   3       2881.79       3619.21       437.54 o
 -10   8   3        430.61        806.54       208.67 o
  -9   8   3       1737.98       2012.48       305.56 o
  -8   8   3       2691.51       2856.14       364.32 o
  -7   8   3      17098.12      17598.39       749.68 o
  -6   8   3        407.23        532.05        96.25 o
  -5   8   3       2239.47       1803.47       291.38 o
  -4   8   3      12367.21      11904.09       438.46 o
  -3   8   3       8415.62       6494.03       250.97 o
  -2   8   3      13318.05      13516.04       323.75 o
  -1   8   3      15120.85      11500.96       459.51 o
   0   8   3       4347.04       4623.39       197.04 o
   1   8   3      17212.36      13178.37       427.23 o
   2   8   3      14143.24      14518.47       825.29 o
   3   8   3       9246.63       7470.07       250.76 o
   4   8   3      11699.18      11916.53       674.38 o
   5   8   3       2478.01       2134.64       201.11 o
   6   8   3        258.01        618.75       120.48 o
   7   8   3      16307.88      16621.84       533.42 o
   8   8   3       3075.48       3095.12       376.16 o
   9   8   3       1815.98       1735.24       297.53 o
  10   8   3        495.81        575.38       198.63 o
  11   8   3       2966.91       2915.56       403.33 o
  12   8   3        163.42        256.05       173.65 o
  13   8   3        373.15        317.60       191.76 o
  14   8   3        141.00        100.89       164.40 o
  15   8   3        207.85        393.12       169.23 o
 -15   9   3        586.28        894.60       273.00 o
 -14   9   3       1251.26       1313.39       303.31 o
 -13   9   3        355.35        646.43       216.28 o
 -12   9   3        130.61        328.79       187.31 o
 -11   9   3        180.76         55.87       118.58 o
 -10   9   3       5625.09       5996.19       562.58 o
  -9   9   3       3728.71       4344.91       464.98 o
  -8   9   3        838.44        753.48       116.53 o
  -7   9   3        973.33        838.81       236.56 o
  -6   9   3       1847.80       2032.86       318.94 o
  -5   9   3      18485.15      16852.93       569.10 o
  -4   9   3       1599.54       1256.76       204.56 o
  -3   9   3        394.58        621.18        95.85 o
  -2   9   3       5617.07       6850.55       366.90 o
  -1   9   3       1188.77        939.08       114.43 o
   0   9   3        210.20        264.19        66.01 o
   1   9   3       1202.47       1453.73       119.19 o
   2   9   3       6390.75       7933.78       413.69 o
   3   9   3        760.01       1030.15       110.58 o
   4   9   3       1693.34       1508.56       279.08 o
   5   9   3      18876.04      17722.66       886.52 o
   6   9   3       2009.81       2097.37       210.56 o
   7   9   3        778.80       1121.72       234.50 o
   8   9   3        849.74        629.00       122.66 o
   9   9   3       3609.56       3860.96       437.11 o
  10   9   3       5810.31       6300.90       574.39 o
  11   9   3        351.13        574.49       218.70 o
  12   9   3        138.87        149.93       146.71 o
  13   9   3        340.07        510.95       206.23 o
  14   9   3       1125.64       1276.67       293.22 o
  15   9   3        699.78       1112.60       302.78 o
 -14  10   3       2487.53       1779.48       347.84 o
 -13  10   3        354.13        234.37       184.12 o
 -12  10   3       1415.26       1597.27       322.67 o
 -11  10   3       2700.93       2646.98       402.36 o
 -10  10   3       1425.63       2219.54       366.17 o
  -9  10   3       2189.54       2814.68       386.97 o
  -8  10   3       2562.91       2990.75       397.61 o
  -7  10   3        443.22        772.39       221.14 o
  -6  10   3       9036.42       9557.56       695.11 o
  -5  10   3        757.24        569.55       199.50 o
  -4  10   3        252.59        577.15       129.46 o
  -3  10   3      12942.86      14017.43       418.37 o
  -2  10   3       2132.79       2656.18       200.19 o
  -1  10   3      17572.21      17576.31       431.51 o
   0  10   3        287.33        129.88        53.82 o
   1  10   3      16930.06      16905.53       644.01 o
   2  10   3       2073.95       2934.90       394.81 o
   3  10   3      11304.26      12911.34       450.15 o
   4  10   3        270.44        721.23       231.57 o
   5  10   3        341.38        416.52       177.71 o
   6  10   3       7857.98       8212.08       640.02 o
   7  10   3        543.81        463.00       103.86 o
   8  10   3       2808.03       2566.72       368.29 o
   9  10   3       2092.67       2444.42       370.83 o
  10  10   3       1223.51       1629.37       325.07 o
  11  10   3       2658.69       2895.39       422.89 o
  12  10   3       1358.26       1120.05       290.88 o
  13  10   3        402.60        473.98       227.54 o
  14  10   3       2558.59       1868.15       364.77 o
 -14  11   3         66.62         64.31       156.75 o
 -13  11   3         44.17        139.06       163.58 o
 -12  11   3        403.32        533.89       237.60 o
 -11  11   3        305.28        797.97       256.88 o
 -10  11   3         89.42        338.43       189.31 o
  -9  11   3        561.13        782.47       234.02 o
  -8  11   3       3062.78       3457.52       452.54 o
  -7  11   3       5677.34       5620.42       563.94 o
  -6  11   3       1736.22       1792.21       335.33 o
  -5  11   3       3233.44       3175.41       408.82 o
  -4  11   3        510.23        422.28       112.51 o
  -3  11   3       1051.49       1434.82       218.70 o
  -2  11   3       8435.86       9123.39       374.24 o
  -1  11   3       1263.36       1447.50       123.22 o
   0  11   3       1668.99       2342.94       169.08 o
   1  11   3       1503.63       1827.73       210.86 o
   2  11   3       7863.51       7571.25       414.53 o
   3  11   3        977.12       1312.15       163.41 o
   4  11   3        259.65        182.51       157.59 o
   5  11   3       3083.39       2579.55       370.46 o
   6  11   3       1232.34       1392.61       293.33 o
   7  11   3       5199.37       4735.31       514.44 o
   8  11   3       3075.29       2897.82       412.65 o
   9  11   3        688.82       1077.72       271.04 o
  10  11   3        203.63        508.89       228.32 o
  11  11   3        422.86        876.03       266.55 o
  12  11   3        406.31        662.13       262.52 o
  13  11   3        101.54        143.49       166.80 o
  14  11   3         71.03          3.62       132.23 o
 -13  12   3        161.30        275.74       192.13 o
 -12  12   3       1366.25       1327.97       315.00 o
 -11  12   3        221.14        215.46       189.73 o
 -10  12   3       1343.72       1287.82       313.41 o
  -9  12   3       7293.98       8283.46       720.34 o
  -8  12   3       3492.08       3542.92       463.92 o
  -7  12   3       1312.82       1448.48       305.79 o
  -6  12   3       1350.25       1580.17       320.70 o
  -5  12   3        328.29        395.59       174.88 o
  -4  12   3        225.24        526.20       230.34 o
  -3  12   3        915.31        958.77       162.82 o
  -2  12   3       1337.08       1188.83       141.08 o
  -1  12   3       4435.46       4111.22       207.97 o
   0  12   3        291.56        371.32        79.89 o
   1  12   3       4102.58       3643.77       217.49 o
   2  12   3       1323.82       1335.64       150.94 o
   3  12   3       1163.72       1098.44       166.77 o
   4  12   3        385.64        505.38       208.66 o
   5  12   3        252.31        378.68       176.07 o
   6  12   3       1393.58       2249.02       373.03 o
   7  12   3       1173.87       1483.71       311.39 o
   8  12   3       3366.18       3361.19       464.28 o
   9  12   3       7530.30       8016.95       703.08 o
  10  12   3       1193.52        839.14       256.25 o
  11  12   3        338.26        402.41       204.62 o
  12  12   3       1380.17       1593.50       336.72 o
  13  12   3        168.06        235.94       180.48 o
 -12  13   3       1424.15       2056.14       399.48 o
 -11  13   3        221.51        357.75       221.08 o
 -10  13   3        634.74        421.79       217.93 o
  -9  13   3        114.56        129.42       132.64 o
  -8  13   3       3785.24       3642.00       494.60 o
  -7  13   3        373.75        703.55       240.81 o
  -6  13   3       5629.03       6464.75       661.82 o
  -5  13   3       1480.52        955.74       257.55 o
  -4  13   3        751.25        836.42       150.30 o
  -3  13   3       1461.36       1129.28       178.16 o
  -2  13   3        127.88        -16.93        75.15 o
  -1  13   3       1778.72       1494.97       132.21 o
   0  13   3        577.42        542.00       100.51 o
   1  13   3       1256.82       1134.35       161.05 o
   2  13   3        109.00        -76.57        76.57 o
   3  13   3       1584.95       1574.98       195.07 o
   4  13   3        804.97        830.92       256.60 o
   5  13   3       1399.28       1181.01       293.74 o
   6  13   3       6267.36       6521.10       671.46 o
   7  13   3        504.23        742.62       246.07 o
   8  13   3       3302.45       3183.28       473.46 o
   9  13   3        210.50        364.99       202.19 o
  10  13   3        719.20        885.06       277.06 o
  11  13   3        180.66        331.21       218.66 o
  12  13   3       1349.25       2269.24       424.00 o
 -11  14   3        421.79        792.38       271.36 o
 -10  14   3        320.60        339.28       207.43 o
  -9  14   3        493.07        585.78       248.47 o
  -8  14   3        554.62       1162.79       332.92 o
  -7  14   3       2622.19       2344.62       410.77 o
  -6  14   3        597.45        800.57       265.38 o
  -5  14   3        469.22        604.69       219.12 o
  -4  14   3       1994.91       1259.64       323.67 o
  -3  14   3       2480.50       2686.52       201.78 o
  -2  14   3       2616.68       2348.45       200.99 o
  -1  14   3        240.93        380.95        79.07 o
   0  14   3        102.38        173.81        81.34 o
   1  14   3        342.69        541.89       128.91 o
   2  14   3       2584.27       2076.54       225.75 o
   3  14   3       2204.18       2055.61       223.36 o
   4  14   3       2085.47       1831.02       378.44 o
   5  14   3        476.62        361.45       173.29 o
   6  14   3        527.52        712.47       259.34 o
   7  14   3       2478.03       2219.93       414.35 o
   8  14   3        483.10        985.42       295.10 o
   9  14   3        492.87        584.18       241.23 o
  10  14   3        397.73        749.36       273.77 o
  11  14   3        368.18        324.82       204.62 o
 -10  15   3          8.11       -210.20       210.20 o
  -9  15   3       1235.57       1030.16       316.17 o
  -8  15   3       2157.73       2598.70       460.09 o
  -7  15   3        860.97       1134.89       321.73 o
  -6  15   3        801.25        574.67       242.49 o
  -5  15   3        139.87        405.97       211.02 o
  -4  15   3       1754.54       1619.89       375.09 o
  -3  15   3       1945.17       2042.64       296.25 o
  -2  15   3       1348.77       1241.15       231.07 o
  -1  15   3       1511.44       1203.90       150.31 o
   0  15   3        272.67        341.22       108.42 o
   1  15   3       1384.57       1381.75       186.20 o
   2  15   3       1349.80       1234.17       180.06 o
   3  15   3       1601.73       1451.13       197.00 o
   4  15   3       1856.38       1798.72       391.22 o
   5  15   3        159.43        237.96       163.60 o
   6  15   3        709.80        349.04       206.29 o
   7  15   3       1004.93       1287.04       329.00 o
   8  15   3       2150.64       2758.49       470.55 o
   9  15   3       1068.44        957.65       315.73 o
  10  15   3         16.03        141.07       156.34 o
  -8  16   3        590.09        818.61       310.40 o
  -7  16   3        621.96        821.45       291.91 o
  -6  16   3       1620.27       1340.70       335.58 o
  -5  16   3       2012.85       2755.88       472.93 o
  -4  16   3       2270.43       1976.32       662.65 o
  -3  16   3       1773.84       2237.05       311.82 o
  -2  16   3         77.91        232.28       116.71 o
  -1  16   3        548.76        784.92       194.55 o
   0  16   3        711.03        947.75       196.66 o
   1  16   3        458.81        566.67       201.83 o
   2  16   3        145.53        148.82       117.40 o
   3  16   3       1906.00       2154.26       307.51 o
   4  16   3       2172.52       1723.01       750.96 o
   5  16   3       1910.68       2276.74       433.86 o
   6  16   3       1504.33       1643.55       382.62 o
   7  16   3        619.96        679.92       271.40 o
   8  16   3        517.04       1036.08       328.87 o
  -6  17   3        493.30        123.02       167.65 o
  -5  17   3        241.14       -144.23       147.43 o
  -4  17   3        928.21        697.90       453.44 o
  -3  17   3        989.50        966.12       481.02 o
  -2  17   3        283.66        197.77       118.60 o
  -1  17   3        147.51        167.60       139.07 o
   0  17   3         37.16        331.73       163.85 o
   1  17   3         89.45         92.47       134.81 o
   2  17   3        294.50        357.12       181.30 o
   3  17   3       1017.10       1117.84       232.10 o
   4  17   3        993.24       1390.34       374.03 o
   5  17   3        190.53        175.27       131.21 o
   6  17   3        503.40        298.32       203.43 o
  -3  18   3        423.53        280.42       345.94 o
  -2  18   3        121.91        268.54       152.28 o
  -1  18   3        459.96       1006.77       223.04 o
   0  18   3        750.78       1229.63       257.99 o
   1  18   3        455.31        946.68       234.39 o
   2  18   3        102.84        203.28       131.44 o
   3  18   3        478.27        432.76       178.05 o
   2   0   4       1276.67       5268.13       145.09 o
   3   0   4       4492.68       6705.76       204.80 o
   4   0   4      17554.24      26012.75       606.67 o
   5   0   4       2680.11       2272.04       107.12 o
   6   0   4      27139.72      29085.97       395.88 o
   7   0   4      25494.65      23451.99       522.71 o
   8   0   4       1566.52       2817.80       195.12 o
   9   0   4          0.76         -4.08        62.45 o
  10   0   4       2551.31       3148.42       228.81 o
  11   0   4        459.90        468.35       101.54 o
  12   0   4       2024.56       2249.98       221.66 o
  13   0   4       3564.20       3270.11       271.74 o
  14   0   4         11.98         30.24        78.56 o
  15   0   4        160.60         71.86        90.02 o
  16   0   4         34.06         71.47        95.89 o
  17   0   4        529.13        370.37       139.10 o
 -17   1   4        369.39        790.28       167.02 o
 -16   1   4        233.15        276.64       131.73 o
 -15   1   4         75.98        186.89       175.64 o
 -14   1   4        305.13        216.26        99.47 o
 -13   1   4       1675.25       1015.35       156.81 o
 -12   1   4       3378.98       3059.39       257.95 o
 -11   1   4       4079.71       4053.23       284.21 o
 -10   1   4      11499.06      12503.75       459.66 o
  -9   1   4        587.64       1308.07       158.21 o
  -8   1   4       7435.10       5193.26       308.55 o
  -7   1   4       8532.71       8333.63       374.42 o
  -6   1   4       5417.52       6067.98       208.57 o
  -5   1   4       3481.27       2587.07       183.54 o
  -4   1   4      10811.39       9615.52       226.48 o
  -3   1   4      87050.27      92744.67      1408.72 o
  -2   1   4      25699.62      27213.10       274.82 o
  -1   1   4       6711.74       3976.80       104.44 o
   0   1   4      12087.29      10224.75       260.77 o
   1   1   4       6306.35       3722.77        89.59 o
   2   1   4      28814.40      29788.20       370.12 o
   3   1   4      88601.83     100086.73      1241.04 o
   4   1   4       7748.08       6286.28       150.85 o
   5   1   4       4743.24       3001.08       200.55 o
   6   1   4       4371.52       4512.65       159.85 o
   7   1   4       8946.74       8706.85       858.50 o
   8   1   4       7139.82       5443.35       482.32 o
   9   1   4        349.91       1128.26       145.97 o
  10   1   4      10721.72      11962.20       452.48 o
  11   1   4       3936.37       3959.11       286.90 o
  12   1   4       3363.24       3137.70       266.11 o
  13   1   4       1600.58        880.52       236.65 o
  14   1   4        291.34        270.50       115.17 o
  15   1   4         81.52        128.77       107.72 o
  16   1   4        181.60        183.64       108.41 o
  17   1   4        297.36        561.43       151.93 o
 -17   2   4        292.16        420.29       133.57 o
 -16   2   4        677.81        583.11       178.94 o
 -15   2   4        145.64        189.42       112.57 o
 -14   2   4       2340.42       2073.01       245.43 o
 -13   2   4       2407.68       2349.45       243.77 o
 -12   2   4        652.20        693.18       143.37 o
 -11   2   4       3239.24       3622.13       261.43 o
 -10   2   4       3511.38       3867.30       265.02 o
  -9   2   4       1453.04       1554.71       239.35 o
  -8   2   4       8892.73       8946.93       508.56 o
  -7   2   4      13494.94      11284.00       904.34 o
  -6   2   4      15768.35      13638.54       517.55 o
  -5   2   4      21073.02      18947.93       426.06 o
  -4   2   4       5724.12       7039.00       291.42 o
  -3   2   4     203306.23     273616.16      1410.17 o
  -2   2   4     145390.53     167739.84      4247.58 o
  -1   2   4      29866.03      26945.09       310.47 o
   0   2   4       1925.42       1763.28        89.78 o
   1   2   4      32344.70      28068.29       367.36 o
   2   2   4     146681.02     167863.31      2164.14 o
   3   2   4     202812.31     276128.94      1299.38 o
   4   2   4       7531.24       8441.06       224.09 o
   5   2   4      20860.04      18856.44       518.33 o
   6   2   4      12520.56      10698.71       396.99 o
   7   2   4      15460.93      13476.70       708.72 o
   8   2   4      10069.02       9901.67       745.18 o
   9   2   4        871.19        862.72       147.45 o
  10   2   4       5011.20       4938.51       296.11 o
  11   2   4       3725.66       4353.40       283.69 o
  12   2   4        703.65        632.05       132.18 o
  13   2   4       2078.80       2025.43       228.15 o
  14   2   4       2256.54       1963.09       224.62 o
  15   2   4         89.29        130.09       103.47 o
  16   2   4        954.34        887.82       175.32 o
  17   2   4        275.51        579.99       150.74 o
 -17   3   4         49.59        147.08        98.87 o
 -16   3   4        153.96         92.19       126.41 o
 -15   3   4        865.83       1337.83       199.36 o
 -14   3   4        460.77       1078.18       181.40 o
 -13   3   4        201.89        359.14       119.28 o
 -12   3   4        778.75        614.98       137.50 o
 -11   3   4       2668.53       2809.44       237.62 o
 -10   3   4       8071.24       8162.05       524.37 o
  -9   3   4        330.00        440.22       117.20 o
  -8   3   4       4978.29       4831.96       434.64 o
  -7   3   4      22654.37      22114.61       965.61 o
  -6   3   4       4809.43       3798.33       210.67 o
  -5   3   4       1577.81       1926.37       126.26 o
  -4   3   4      39635.76      37027.49       482.02 o
  -3   3   4      42471.11      40977.34       606.37 o
  -2   3   4      39998.92      40012.11       572.87 o
  -1   3   4     249349.81     356387.44      2972.94 o
   0   3   4       3691.53       2985.24       133.25 o
   1   3   4     244762.61     342682.59      1576.28 o
   2   3   4      43994.93      43862.81       432.27 o
   3   3   4      41754.38      40643.64       601.35 o
   4   3   4      38225.74      35074.51      1339.76 o
   5   3   4       1833.87       2931.95       181.28 o
   6   3   4       4614.98       4019.31       218.74 o
   7   3   4      21716.69      20744.32       527.37 o
   8   3   4       5013.07       5013.24       269.84 o
   9   3   4        344.79        417.62       102.49 o
  10   3   4       8929.89       8765.68       413.06 o
  11   3   4       2495.20       2898.47       240.99 o
  12   3   4        378.44        160.82        97.43 o
  13   3   4        290.24        621.77       140.07 o
  14   3   4        539.93       1062.30       176.16 o
  15   3   4        704.69       1009.70       175.05 o
  16   3   4        207.41        104.24        87.24 o
  17   3   4         41.84        204.87       120.78 o
 -17   4   4        294.89        327.76       151.20 o
 -16   4   4       1925.30       2447.45       270.70 o
 -15   4   4       1051.68       1165.14       183.94 o
 -14   4   4       2012.77       1853.83       234.67 o
 -13   4   4        552.06        282.44        99.79 o
 -12   4   4        661.65        851.53       146.87 o
 -11   4   4       3799.36       3684.35       326.14 o
 -10   4   4       2006.97       2308.63       202.98 o
  -9   4   4       5293.92       5901.56       311.78 o
  -8   4   4        429.29        509.49       159.24 o
  -7   4   4        804.35        427.30       135.19 o
  -6   4   4      52459.21      50780.86      1165.97 o
  -5   4   4       5405.38       3995.11       177.25 o
  -4   4   4      16952.20      13695.28      1203.68 o
  -3   4   4      13494.19       8119.04       295.68 o
  -2   4   4      39825.49      40054.69       767.73 o
  -1   4   4       1387.38       1841.30       101.23 o
   0   4   4       1404.24        877.29       112.61 o
   1   4   4       1401.75       2102.63       198.83 o
   2   4   4      30902.19      29387.64       393.38 o
   3   4   4      13873.30       9159.07       247.60 o
   4   4   4      15383.00      12649.11       379.99 o
   5   4   4       6648.18       4712.68       230.85 o
   6   4   4      52710.86      52161.86      1185.43 o
   7   4   4       1192.51        979.05       191.22 o
   8   4   4        753.50        462.22       156.89 o
   9   4   4       4211.78       4857.65       287.13 o
  10   4   4       2229.13       2268.38       202.86 o
  11   4   4       2795.69       2771.93       244.06 o
  12   4   4        686.26        610.10       129.88 o
  13   4   4        627.04        518.06       142.35 o
  14   4   4       1686.30       1524.36       216.77 o
  15   4   4       1328.10       1438.61       256.87 o
  16   4   4       2093.62       2812.31       289.65 o
  17   4   4        281.99        309.71       132.15 o
 -16   5   4        803.75       1279.18       289.53 o
 -15   5   4       1375.67       1640.23       318.63 o
 -14   5   4        504.25        584.60       212.29 o
 -13   5   4        281.50        507.72       196.98 o
 -12   5   4       3984.35       4054.52       438.00 o
 -11   5   4        289.08        320.81       149.95 o
 -10   5   4       1426.05       1507.72       257.19 o
  -9   5   4       1884.55       1437.37       240.43 o
  -8   5   4        301.60        185.34       117.80 o
  -7   5   4      24235.07      26009.05       901.48 o
  -6   5   4       6133.43       7083.08       450.85 o
  -5   5   4       5715.08       5182.84       378.37 o
  -4   5   4       1908.22       1810.97       181.05 o
  -3   5   4      17580.45      20556.80       508.59 o
  -2   5   4      12078.53      10197.17       255.20 o
  -1   5   4       2102.25       2426.67       104.99 o
   0   5   4      74870.82      80242.21       733.12 o
   1   5   4       1029.95       1255.13       113.41 o
   2   5   4      11347.72       9660.77       250.01 o
   3   5   4      17730.06      19867.66       431.87 o
   4   5   4        875.06       1823.52       296.89 o
   5   5   4       3988.04       3716.06       324.37 o
   6   5   4       3820.21       4564.85       367.74 o
   7   5   4      25280.28      25212.94       895.17 o
   8   5   4        114.80        147.12       112.15 o
   9   5   4       2001.56       2059.06       283.56 o
  10   5   4        723.54        980.16       217.19 o
  11   5   4        334.59        397.61       161.62 o
  12   5   4       3835.52       4106.82       440.77 o
  13   5   4        268.13        573.65       205.02 o
  14   5   4        701.99        709.35       222.78 o
  15   5   4       1747.97       2250.75       366.20 o
  16   5   4        677.01        953.37       256.54 o
 -16   6   4        175.73        480.33       212.23 o
 -15   6   4        354.84        459.50       201.81 o
 -14   6   4       2275.11       2400.72       376.03 o
 -13   6   4       1228.23        561.62       197.13 o
 -12   6   4       1105.48        987.61       240.57 o
 -11   6   4       3494.99       3075.13       379.80 o
 -10   6   4       5329.02       6687.81       530.05 o
  -9   6   4       1621.22       1712.22       272.15 o
  -8   6   4       3022.15       3751.35       380.70 o
  -7   6   4        508.31        639.03       180.57 o
  -6   6   4      17424.37      16449.03       756.15 o
  -5   6   4       7952.27       8007.15       243.31 o
  -4   6   4      56410.24      58870.20      1332.64 o
  -3   6   4       8020.25      12466.67      1044.43 o
  -2   6   4       2575.47       3033.13       120.86 o
  -1   6   4      29033.43      41315.28       749.88 o
   0   6   4      38291.43      43267.58       908.51 o
   1   6   4      31881.94      45195.20       695.89 o
   2   6   4        979.66       2163.27       151.92 o
   3   6   4       8238.64      12697.83       544.34 o
   4   6   4      55126.91      60496.25      1167.29 o
   5   6   4       5118.09       5862.45       450.84 o
   6   6   4      16578.25      15424.52       724.94 o
   7   6   4        753.75        878.17       201.94 o
   8   6   4       3670.22       4551.98       422.14 o
   9   6   4       1822.32       1915.13       281.87 o
  10   6   4       5708.52       6813.54       533.88 o
  11   6   4       3991.34       3119.27       381.59 o
  12   6   4       1137.97        816.26       214.02 o
  13   6   4        987.20        841.46       234.10 o
  14   6   4       2064.64       2150.36       350.21 o
  15   6   4        393.45        325.23       198.60 o
  16   6   4        295.63        457.46       207.43 o
 -16   7   4        564.07        260.13       172.48 o
 -15   7   4        185.03        319.15       182.09 o
 -14   7   4        349.78        312.76       160.80 o
 -13   7   4       2279.64       2892.87       394.98 o
 -12   7   4       1317.94       1475.81       298.14 o
 -11   7   4        528.30        534.38       209.89 o
 -10   7   4        556.31        633.73       195.83 o
  -9   7   4       1307.49       1739.32       279.29 o
  -8   7   4      13886.05      13691.34       748.05 o
  -7   7   4       3743.92       4115.13       410.91 o
  -6   7   4        444.82        288.37        77.21 o
  -5   7   4      12170.03      12606.88       659.11 o
  -4   7   4       6232.15       6599.62       468.71 o
  -3   7   4      54823.39      44405.78      1417.18 o
  -2   7   4       2055.31       2686.23       134.79 o
  -1   7   4       1410.43       1398.27       136.19 o
   0   7   4        264.16        296.07        74.75 o
   1   7   4       1540.88       1862.27       288.49 o
   2   7   4       2556.53       3091.19       379.92 o
   3   7   4      56104.05      48401.93      1114.60 o
   4   7   4       5930.60       5231.63       427.24 o
   5   7   4      13907.59      15018.65       559.09 o
   6   7   4        576.42        460.31        94.88 o
   7   7   4       3772.81       3546.92       386.30 o
   8   7   4      13120.41      13162.76       734.41 o
   9   7   4        895.49       1259.90       238.95 o
  10   7   4        729.32        814.42       230.85 o
  11   7   4        717.95        597.61       214.75 o
  12   7   4       1566.04       2041.93       342.07 o
  13   7   4       2253.92       2861.41       396.58 o
  14   7   4        536.74        606.72       196.21 o
  15   7   4        159.56         50.24       126.61 o
  16   7   4        470.33        364.64       206.24 o
 -15   8   4         44.32         59.08       124.59 o
 -14   8   4        838.58        659.93       217.56 o
 -13   8   4       2087.87       2628.64       390.07 o
 -12   8   4       3224.06       2688.49       384.82 o
 -11   8   4       1877.89       1480.98       291.45 o
 -10   8   4       1614.83       1983.48       308.31 o
  -9   8   4         57.40        250.40       155.14 o
  -8   8   4       2591.86       1780.71       289.33 o
  -7   8   4       7425.52       5383.96       356.92 o
  -6   8   4       3162.62       2810.28       353.35 o
  -5   8   4       1358.42       1921.88       285.02 o
  -4   8   4       6101.81       4709.21       468.05 o
  -3   8   4       1460.56       1585.58       130.10 o
  -2   8   4       6999.10       5073.51       200.97 o
  -1   8   4       3566.50       2757.39       203.88 o
   0   8   4       1193.58       1096.19       104.48 o
   1   8   4       3901.39       3498.52       188.96 o
   2   8   4       9021.87       6851.20       442.39 o
   3   8   4       1102.44       1370.14       108.66 o
   4   8   4       4848.66       3554.84       381.77 o
   5   8   4       1393.56       1498.39       173.60 o
   6   8   4       2422.65       2050.15       252.30 o
   7   8   4       5561.21       4557.15       285.23 o
   8   8   4       1928.85       1561.05       173.59 o
   9   8   4         74.19        104.90       130.63 o
  10   8   4       1627.04       1687.67       299.46 o
  11   8   4       1944.35       1655.38       301.12 o
  12   8   4       3201.05       2464.41       383.20 o
  13   8   4       2821.35       3108.21       430.97 o
  14   8   4        870.49        730.32       233.25 o
  15   8   4         18.32         50.64       136.65 o
 -15   9   4        185.97        260.47       159.58 o
 -14   9   4        428.01        595.80       225.14 o
 -13   9   4        650.72        677.54       227.99 o
 -12   9   4       1497.35       1652.56       334.37 o
 -11   9   4        295.18        331.65       178.89 o
 -10   9   4        925.64       1065.10       267.48 o
  -9   9   4       2602.27       2544.87       376.67 o
  -8   9   4       2619.98       2133.18       170.03 o
  -7   9   4       7553.08       7815.50       611.54 o
  -6   9   4         96.61         49.04       112.95 o
  -5   9   4       3553.56       3273.90       249.42 o
  -4   9   4       4480.91       3854.18       357.37 o
  -3   9   4       7953.40       6095.04       261.89 o
  -2   9   4       3538.13       4346.96       197.05 o
  -1   9   4       2001.29       1903.34       127.75 o
   0   9   4        190.13        166.45        55.24 o
   1   9   4       1999.93       2213.88       147.04 o
   2   9   4       4165.96       5270.27       652.70 o
   3   9   4       7763.43       5433.15       260.52 o
   4   9   4       4273.07       3800.60       441.09 o
   5   9   4       3198.95       3019.53       377.94 o
   6   9   4        203.05        198.50        93.75 o
   7   9   4       8737.53       8916.12       423.86 o
   8   9   4       2047.74       1488.60       179.80 o
   9   9   4       2567.99       2485.17       364.98 o
  10   9   4        802.75       1078.66       273.08 o
  11   9   4        294.22        541.50       207.43 o
  12   9   4       1465.37       1570.43       329.13 o
  13   9   4        718.13        823.14       250.12 o
  14   9   4        455.11        792.01       255.69 o
  15   9   4        234.24        177.67       166.41 o
 -14  10   4        494.15        725.69       248.06 o
 -13  10   4       2251.02       1894.44       356.26 o
 -12  10   4         33.74         42.20       116.56 o
 -11  10   4       1133.00       1299.32       292.85 o
 -10  10   4        734.67       1081.78       269.44 o
  -9  10   4       4501.51       4481.05       504.35 o
  -8  10   4       1890.90       2112.44       345.43 o
  -7  10   4        368.99        136.29       138.30 o
  -6  10   4       1992.06       2086.03       343.11 o
  -5  10   4       9591.72       8027.37       668.36 o
  -4  10   4       5182.99       4372.76       299.39 o
  -3  10   4       6159.52       6035.24       276.95 o
  -2  10   4       4116.64       3569.72       223.60 o
  -1  10   4       2309.50       2449.66       149.15 o
   0  10   4       1451.98       1928.37       141.96 o
   1  10   4       2865.08       3204.78       307.61 o
   2  10   4       2708.98       2282.68       338.25 o
   3  10   4       5382.61       5241.50       284.50 o
   4  10   4       5012.08       5151.40       507.54 o
   5  10   4       9188.71       8505.14       631.77 o
   6  10   4       1827.24       1765.99       324.53 o
   7  10   4        227.30        182.63        85.03 o
   8  10   4       2429.04       2488.48       370.57 o
   9  10   4       4654.52       3934.04       483.84 o
  10  10   4        850.91       1157.90       302.04 o
  11  10   4       1172.93       1152.93       276.77 o
  12  10   4         28.15         -2.81       119.37 o
  13  10   4       2029.40       1703.36       345.34 o
  14  10   4        418.82        487.25       212.67 o
 -14  11   4        168.70        109.33       145.91 o
 -13  11   4        945.63       1712.85       358.74 o
 -12  11   4        668.62        843.61       252.12 o
 -11  11   4        809.90       1441.32       323.73 o
 -10  11   4       5349.99       4430.07       528.73 o
  -9  11   4         39.69        163.58       147.10 o
  -8  11   4       4186.45       4255.48       510.66 o
  -7  11   4        619.36        612.44       235.25 o
  -6  11   4        909.30        716.00       222.85 o
  -5  11   4       4624.08       5205.93       528.06 o
  -4  11   4       2167.04       2047.97       215.52 o
  -3  11   4       2813.16       2678.32       199.11 o
  -2  11   4       8344.70       7176.21       338.03 o
  -1  11   4       6703.88       6285.63       245.58 o
   0  11   4        234.75        218.10        71.13 o
   1  11   4       8175.68       7994.71       296.55 o
   2  11   4       7566.56       7112.94       631.16 o
   3  11   4       2636.48       2754.38       303.86 o
   4  11   4       2332.24       2526.67       369.82 o
   5  11   4       4967.17       5017.85       515.72 o
   6  11   4       1186.19       1045.72       256.30 o
   7  11   4        303.98        337.29       208.24 o
   8  11   4       3558.19       3373.11       451.92 o
   9  11   4         61.15        326.36       195.74 o
  10  11   4       6006.72       5117.65       567.37 o
  11  11   4        748.75        864.59       251.33 o
  12  11   4        966.85       1256.44       311.29 o
  13  11   4        962.87       1667.42       365.18 o
  14  11   4        162.92        178.47       166.41 o
 -13  12   4        449.00        360.62       189.35 o
 -12  12   4       1659.97       1774.88       357.31 o
 -11  12   4       1513.72       1715.22       347.63 o
 -10  12   4       1353.41       1424.21       323.06 o
  -9  12   4        937.76       1007.52       288.78 o
  -8  12   4       5030.08       5161.64       565.00 o
  -7  12   4        418.59        443.46       216.30 o
  -6  12   4       1447.35       2086.95       371.43 o
  -5  12   4       1955.64       2441.91       394.17 o
  -4  12   4        357.23        578.53       217.50 o
  -3  12   4        425.24        537.69       128.66 o
  -2  12   4      17171.95      16152.53       812.63 o
  -1  12   4        491.77        272.66        89.95 o
   0  12   4         72.51        119.99        57.74 o
   1  12   4        294.09        330.29       113.60 o
   2  12   4      16964.79      14734.86       659.94 o
   3  12   4        505.58        666.82       131.30 o
   4  12   4        525.10        659.85       221.16 o
   5  12   4       2463.56       3253.49       450.34 o
   6  12   4       1709.17       2336.59       377.15 o
   7  12   4        532.15        577.40       233.61 o
   8  12   4       5092.87       5118.32       564.62 o
   9  12   4        997.69       1149.15       325.80 o
  10  12   4       1384.44       1359.87       313.01 o
  11  12   4       1358.87       1897.27       368.11 o
  12  12   4       1698.60       2151.97       390.72 o
  13  12   4        364.22        756.97       256.08 o
 -12  13   4        755.29       1055.54       300.78 o
 -11  13   4        515.31       1026.03       304.35 o
 -10  13   4        983.89        722.34       242.12 o
  -9  13   4       1040.76        781.11       252.19 o
  -8  13   4        553.66        490.13       224.36 o
  -7  13   4        111.50        321.55       201.77 o
  -6  13   4        144.79        121.39       155.15 o
  -5  13   4       1421.73       2051.41       357.33 o
  -4  13   4        125.33        294.13       120.11 o
  -3  13   4        460.56        327.04       127.46 o
  -2  13   4       1745.20       1346.10       140.23 o
  -1  13   4       1811.35       2173.09       156.76 o
   0  13   4        158.05        376.05        89.46 o
   1  13   4       1722.78       1947.64       207.26 o
   2  13   4       1907.85       1250.73       141.62 o
   3  13   4        548.22        707.75       146.32 o
   4  13   4        208.67        403.18       217.47 o
   5  13   4       1592.79       1887.91       348.12 o
   6  13   4        244.55        321.19       203.41 o
   7  13   4         79.84        368.57       190.92 o
   8  13   4        508.42        406.49       218.72 o
   9  13   4        968.68        759.76       245.74 o
  10  13   4       1003.09        894.49       263.04 o
  11  13   4        642.08        762.36       255.73 o
  12  13   4        799.20       1052.76       318.48 o
 -11  14   4       1081.59       1749.57       372.04 o
 -10  14   4        794.75       1090.98       320.10 o
  -9  14   4         76.29       -178.86       191.32 o
  -8  14   4       1264.45       1190.76       327.86 o
  -7  14   4        449.37        389.98       227.96 o
  -6  14   4       1265.68       1795.50       365.70 o
  -5  14   4        765.98        915.30       261.00 o
  -4  14   4       2036.01       1907.43       397.35 o
  -3  14   4        519.60        484.14       104.87 o
  -2  14   4       3844.98       3938.61       294.32 o
  -1  14   4       2432.07       2693.12       178.78 o
   0  14   4         10.45        -27.66        67.34 o
   1  14   4       2607.03       2795.41       264.59 o
   2  14   4       3755.53       3654.33       357.55 o
   3  14   4        664.30        353.95       146.17 o
   4  14   4       2331.33       2795.80       466.30 o
   5  14   4        492.99        355.02       182.14 o
   6  14   4       1244.90       1210.92       315.00 o
   7  14   4        421.42        438.62       228.76 o
   8  14   4       1212.60       1285.65       329.06 o
   9  14   4        105.97         -0.80       151.13 o
  10  14   4        850.32       1062.47       314.08 o
  11  14   4       1153.27       1390.07       339.47 o
 -10  15   4         81.51       -223.47       223.47 o
  -9  15   4        430.87        424.54       235.18 o
  -8  15   4        442.06        841.85       293.48 o
  -7  15   4        641.77        655.41       262.57 o
  -6  15   4         17.57        -36.98       151.12 o
  -5  15   4        314.39        219.89       180.10 o
  -4  15   4       1468.23       2055.69       411.22 o
  -3  15   4        495.56        571.31       365.47 o
  -2  15   4        544.04        638.02       134.17 o
  -1  15   4        533.08        512.00       110.55 o
   0  15   4        958.64       1046.88       160.18 o
   1  15   4        562.77        808.37       154.71 o
   2  15   4        582.64        594.19       121.49 o
   3  15   4        365.59        613.52       129.83 o
   4  15   4       1671.86       2271.31       427.38 o
   5  15   4        260.41        -56.68       174.06 o
   6  15   4         38.13       -108.12       165.59 o
   7  15   4        557.48        427.00       206.66 o
   8  15   4        394.56        626.34       254.88 o
   9  15   4        452.28        496.11       234.38 o
  10  15   4         84.68        290.19       202.57 o
  -8  16   4        264.50        417.65       248.02 o
  -7  16   4       2187.35       2976.24       491.48 o
  -6  16   4        255.76        518.15       237.17 o
  -5  16   4        311.09        131.85       189.74 o
  -4  16   4        155.03        235.41       134.14 o
  -3  16   4        539.67        734.80       225.36 o
  -2  16   4        360.85        331.58       147.04 o
  -1  16   4       2554.66       2620.16       351.89 o
   0  16   4         47.46         61.72       107.86 o
   1  16   4       2190.81       1871.73       308.16 o
   2  16   4        224.26        149.14        96.21 o
   3  16   4        550.78        716.47       147.35 o
   4  16   4        132.65         41.23       107.66 o
   5  16   4        401.25        367.85       254.48 o
   6  16   4        399.37        469.16       226.34 o
   7  16   4       2333.56       3097.31       502.40 o
   8  16   4        294.78        477.56       218.28 o
  -6  17   4        985.41        841.75       303.64 o
  -5  17   4        514.00        202.51       135.85 o
  -4  17   4        379.55        528.36       480.00 o
  -3  17   4        172.29        268.54       129.23 o
  -2  17   4       1887.81       1517.87       271.25 o
  -1  17   4        276.78        392.56       164.28 o
   0  17   4        398.35        625.95       193.30 o
   1  17   4        243.87         41.27       281.99 o
   2  17   4       1922.34       1594.77       267.92 o
   3  17   4        165.67        125.58       130.37 o
   4  17   4        375.41        296.53       456.89 o
   5  17   4        517.49        221.75       279.22 o
   6  17   4       1050.28        950.78       300.04 o
  -3  18   4        138.86        330.51       170.42 o
  -2  18   4        312.80        551.83       186.70 o
  -1  18   4        493.88        327.85       201.82 o
   0  18   4         38.42        156.61       288.98 o
   1  18   4        567.66        599.76       172.28 o
   2  18   4        407.33       1032.42       234.97 o
   3  18   4        119.05        173.16       129.91 o
   2   0   5      26092.46      14631.89       304.05 o
   3   0   5     268460.62     324303.22      1382.49 o
   4   0   5     103944.13     100953.87      1283.68 o
   5   0   5       9911.39      20365.13       299.74 o
   6   0   5       1579.75       1343.31        95.81 o
   7   0   5        716.69       1125.20       145.79 o
   8   0   5       4946.13       4650.02       266.65 o
   9   0   5       5214.21       4062.65       255.61 o
  10   0   5        909.99       1008.96       148.21 o
  11   0   5       3773.72       2783.13       230.97 o
  12   0   5       4228.75       4267.67       288.54 o
  13   0   5        271.84        137.37        90.53 o
  14   0   5        163.15        267.70       100.00 o
  15   0   5        723.98        809.70       165.19 o
  16   0   5         70.65        -61.34        88.46 o
  17   0   5        315.94        464.72       146.19 o
 -17   1   5       1944.72       1884.24       293.78 o
 -16   1   5        711.16        945.21       175.03 o
 -15   1   5        139.26        259.19       108.30 o
 -14   1   5        338.94        359.99       111.21 o
 -13   1   5       1596.19       1470.55       214.71 o
 -12   1   5       3223.00       2825.78       244.15 o
 -11   1   5        420.94        742.32       166.06 o
 -10   1   5        694.49        914.54       249.98 o
  -9   1   5       2596.00       2325.30       188.69 o
  -8   1   5       7125.02       7378.03       750.30 o
  -7   1   5      21409.48      22364.61       913.89 o
  -6   1   5      17097.73      17674.09       304.04 o
  -5   1   5       8691.09       9400.14       228.28 o
  -4   1   5      23518.37      21460.04       380.38 o
  -3   1   5      49527.94      42697.75       491.03 o
  -2   1   5       9900.99       8915.39       145.07 o
  -1   1   5       5450.02       1049.27        49.25 o
   0   1   5      84094.53      92926.41       887.38 o
   1   1   5       6855.03       1767.84        63.76 o
   2   1   5       9331.56       8344.94       140.80 o
   3   1   5      52721.83      45092.38       368.84 o
   4   1   5      20390.36      18068.50       258.66 o
   5   1   5       8154.54       9374.92       203.95 o
   6   1   5      14722.37      15120.59       282.01 o
   7   1   5      21242.75      21077.24       497.34 o
   8   1   5       5965.18       5950.88       478.29 o
   9   1   5       2599.33       2238.94       189.01 o
  10   1   5       1042.29       1076.13       147.58 o
  11   1   5        524.20        767.64       129.78 o
  12   1   5       4116.83       3863.69       283.57 o
  13   1   5       1733.20       1453.03       186.77 o
  14   1   5        373.43        366.11       114.78 o
  15   1   5        145.45        329.62       119.56 o
  16   1   5        472.36        549.44       143.67 o
  17   1   5       1842.98       1608.98       264.59 o
 -17   2   5         99.51        107.37        98.60 o
 -16   2   5       1024.36       1263.38       203.91 o
 -15   2   5        175.82        108.91       103.87 o
 -14   2   5       1889.11       1762.25       220.79 o
 -13   2   5       4222.37       4317.93       313.10 o
 -12   2   5       2523.96       2462.45       231.44 o
 -11   2   5        330.07        473.67       108.94 o
 -10   2   5       2233.43       2739.76       227.18 o
  -9   2   5      21548.13      22092.52       582.03 o
  -8   2   5       5238.97       4808.07       263.71 o
  -7   2   5       2213.64        989.90       158.07 o
  -6   2   5      13008.96      16277.73       575.75 o
  -5   2   5      22547.66      18302.38       363.98 o
  -4   2   5      79126.91      93905.95       740.88 o
  -3   2   5     159478.66     172989.31      2145.30 o
  -2   2   5       1472.26        906.56        88.89 o
  -1   2   5      21922.94      13834.95       205.93 o
   0   2   5      27849.46      20229.41       275.53 o
   1   2   5      22102.12      13463.05       206.10 o
   2   2   5       2279.94        920.48        86.01 o
   3   2   5     154434.31     167891.19      1777.30 o
   4   2   5      79939.88      92870.52      1199.00 o
   5   2   5      19564.88      15771.46       274.04 o
   6   2   5       8671.48      11744.14       255.85 o
   7   2   5       2623.98       1481.10       143.51 o
   8   2   5       3843.57       3594.71       233.51 o
   9   2   5      22924.72      21976.87       584.39 o
  10   2   5       2410.20       2345.08       213.92 o
  11   2   5        514.27        702.42       126.73 o
  12   2   5       2181.23       2030.16       210.72 o
  13   2   5       4215.74       4320.88       313.45 o
  14   2   5       2149.91       2104.09       234.05 o
  15   2   5        235.86         65.35        99.50 o
  16   2   5        893.81       1202.09       197.09 o
  17   2   5        109.31        121.75       108.12 o
 -17   3   5        150.52         83.30        91.24 o
 -16   3   5        492.34        442.88       160.22 o
 -15   3   5        935.08        872.55       172.39 o
 -14   3   5       1461.80       1316.44       192.02 o
 -13   3   5        588.71        355.09       114.33 o
 -12   3   5       1668.82       1277.30       171.81 o
 -11   3   5       2396.93       2776.32       244.13 o
 -10   3   5       8516.74       8680.61       460.52 o
  -9   3   5       2481.70       3351.00       228.48 o
  -8   3   5       4485.19       5639.38       286.26 o
  -7   3   5       3872.60       3189.89       209.01 o
  -6   3   5       9255.88       8955.61       319.51 o
  -5   3   5       2747.86       3674.01       161.92 o
  -4   3   5      75922.04      72967.14       737.53 o
  -3   3   5      27564.06      20882.06       465.51 o
  -2   3   5       9816.49       8023.89       358.80 o
  -1   3   5      51594.53      49803.25       478.98 o
   0   3   5        367.43        552.11        64.47 o
   1   3   5      51832.15      51017.18       547.01 o
   2   3   5      10067.64       8607.03       192.10 o
   3   3   5      28114.71      22145.51       532.60 o
   4   3   5      77801.38      75845.48      1976.98 o
   5   3   5       2923.19       3809.13       167.56 o
   6   3   5       9683.65      10134.64       343.14 o
   7   3   5       2919.15       2333.50       183.29 o
   8   3   5       5245.06       6372.78       439.63 o
   9   3   5       1849.23       2670.15       204.20 o
  10   3   5       8882.31       8779.11       396.92 o
  11   3   5       2783.67       3196.67       271.83 o
  12   3   5       1876.28       1527.47       188.17 o
  13   3   5        662.52        507.14       126.01 o
  14   3   5       1318.61       1351.53       190.20 o
  15   3   5       1019.47        811.83       166.40 o
  16   3   5        614.69        779.57       165.59 o
  17   3   5        103.03        -26.99       101.89 o
 -17   4   5        336.60        629.43       166.56 o
 -16   4   5        795.89       1163.86       204.31 o
 -15   4   5        263.06        172.46       105.95 o
 -14   4   5       2972.92       3132.08       284.50 o
 -13   4   5        739.12        545.82       131.22 o
 -12   4   5       1615.39       1444.68       189.02 o
 -11   4   5       5103.02       5624.20       335.52 o
 -10   4   5       4723.63       4273.78       523.23 o
  -9   4   5       5756.12       5966.13       317.03 o
  -8   4   5       2685.58       2223.91       270.18 o
  -7   4   5        209.83        327.24       122.21 o
  -6   4   5      29097.66      35825.22       960.11 o
  -5   4   5      10544.75       9044.19       266.67 o
  -4   4   5      10652.07      12930.50       383.26 o
  -3   4   5       4724.97       4337.06       222.09 o
  -2   4   5      79874.11      84702.73      1796.35 o
  -1   4   5      42117.41      45939.80       952.84 o
   0   4   5     149735.20     155989.16      3263.85 o
   1   4   5      43734.60      46270.41       596.44 o
   2   4   5      84069.67      94080.13      1094.03 o
   3   4   5       5290.44       5531.88       408.30 o
   4   4   5      13531.60      15137.39       415.55 o
   5   4   5       8477.10       7687.81       245.62 o
   6   4   5      30218.79      37076.48       985.57 o
   7   4   5        764.66       1506.31       221.68 o
   8   4   5       2964.48       2274.70       275.92 o
   9   4   5       6025.39       6264.86       327.73 o
  10   4   5       5049.29       4985.20       307.12 o
  11   4   5       4498.87       4819.23       315.10 o
  12   4   5       1183.00       1220.11       177.89 o
  13   4   5        983.08        717.27       140.61 o
  14   4   5       3303.04       3181.49       288.77 o
  15   4   5        294.22        234.18       111.53 o
  16   4   5        695.25       1120.43       204.00 o
  17   4   5        446.96        620.48       179.10 o
 -16   5   5        344.27        446.22       197.78 o
 -15   5   5        660.82        390.04       179.74 o
 -14   5   5        868.85       1076.63       264.23 o
 -13   5   5        565.70        710.09       209.09 o
 -12   5   5        531.53        568.16       199.44 o
 -11   5   5       2962.48       1884.54       292.19 o
 -10   5   5       2642.67       1798.90       276.04 o
  -9   5   5        135.91        406.39       147.92 o
  -8   5   5        243.59        119.80       102.11 o
  -7   5   5       2921.68       3546.16       344.13 o
  -6   5   5       2214.23       1801.39       255.21 o
  -5   5   5      12337.39      13639.54       616.52 o
  -4   5   5      17467.38      18285.29       951.19 o
  -3   5   5       3817.85       4399.43       417.97 o
  -2   5   5       1625.69       1436.56       111.29 o
  -1   5   5       5441.92       5656.91       154.16 o
   0   5   5        744.99       1097.50       138.29 o
   1   5   5       4760.57       5521.90       339.40 o
   2   5   5       1351.18        959.06       110.06 o
   3   5   5       2522.56       2544.17       144.61 o
   4   5   5      14206.63      15350.54       356.66 o
   5   5   5      13014.93      12666.94       593.37 o
   6   5   5       1758.97       1363.46       228.05 o
   7   5   5       3350.74       3492.42       344.32 o
   8   5   5        170.24        252.85       124.62 o
   9   5   5        227.88        646.02       178.49 o
  10   5   5       2924.52       2310.13       305.95 o
  11   5   5       3318.87       2284.70       324.95 o
  12   5   5        635.08        548.91       200.26 o
  13   5   5        604.87        698.46       211.51 o
  14   5   5        659.81        846.04       242.87 o
  15   5   5        518.79        547.60       194.60 o
  16   5   5        381.07        662.11       233.17 o
 -16   6   5       1903.54       1563.04       315.91 o
 -15   6   5       1461.53       1681.34       314.62 o
 -14   6   5        137.34        379.44       198.96 o
 -13   6   5       1259.86       1735.18       318.63 o
 -12   6   5       2005.74       2641.43       366.36 o
 -11   6   5        576.30        742.71       207.49 o
 -10   6   5        580.21        891.13       230.42 o
  -9   6   5       1982.37       1836.50       289.57 o
  -8   6   5       4612.24       3912.33       386.22 o
  -7   6   5      10175.40      10928.19       613.99 o
  -6   6   5      27458.50      29548.23       982.53 o
  -5   6   5       1340.10       1796.36       268.19 o
  -4   6   5      14130.62      15514.51       668.19 o
  -3   6   5      10541.23       9042.31      2258.71 o
  -2   6   5        765.24       1540.85        87.79 o
  -1   6   5       6751.30       3722.62       181.27 o
   0   6   5      27201.12      26434.83       625.57 o
   1   6   5       5689.74       3532.37       203.58 o
   2   6   5       1091.59       1179.86       118.86 o
   3   6   5      10928.16      10466.64       470.22 o
   4   6   5      15666.53      16410.64       397.04 o
   5   6   5       1209.84       2805.35       344.43 o
   6   6   5      30920.66      33513.41      1044.01 o
   7   6   5       8256.60       9170.88       563.46 o
   8   6   5       5347.74       5087.71       433.85 o
   9   6   5       1742.46       2068.36       306.41 o
  10   6   5       1076.26       1208.99       245.82 o
  11   6   5        729.67        582.75       192.64 o
  12   6   5       1751.20       2075.73       321.20 o
  13   6   5       1109.58       1701.58       323.82 o
  14   6   5        220.03        355.75       186.11 o
  15   6   5       1655.55       1828.85       334.38 o
  16   6   5       1720.92       1417.99       308.63 o
 -16   7   5        415.71        723.63       240.81 o
 -15   7   5        437.26        490.48       210.66 o
 -14   7   5        522.34        858.80       248.07 o
 -13   7   5        310.10        568.83       217.08 o
 -12   7   5       1184.67        805.00       228.10 o
 -11   7   5       1664.66       1295.23       250.35 o
 -10   7   5       4164.21       3362.16       392.58 o
  -9   7   5       3061.77       3459.73       395.88 o
  -8   7   5       1354.31       1232.82       260.81 o
  -7   7   5      19236.91      19175.40       851.41 o
  -6   7   5       3145.88       3458.09       446.84 o
  -5   7   5       4090.57       3397.07       361.24 o
  -4   7   5       7138.19       6647.68       488.35 o
  -3   7   5       4010.79       3106.74       397.24 o
  -2   7   5      16528.17      14007.99       389.64 o
  -1   7   5      23863.82      22090.69       676.41 o
   0   7   5      45869.83      40524.88       543.74 o
   1   7   5      23523.93      21493.27       861.75 o
   2   7   5      14210.14      12411.38       464.41 o
   3   7   5       3827.85       3351.89       153.33 o
   4   7   5       7103.48       6348.05       332.17 o
   5   7   5       3968.73       3857.89       257.53 o
   6   7   5       3261.84       3603.39       955.94 o
   7   7   5      18346.43      18341.27       835.39 o
   8   7   5       1750.38       1249.86       257.30 o
   9   7   5       3288.53       3330.67       387.10 o
  10   7   5       3928.55       3388.85       392.50 o
  11   7   5       1642.73       1355.98       264.84 o
  12   7   5       1127.26       1376.61       284.01 o
  13   7   5        485.89        473.62       189.77 o
  14   7   5        465.88        820.57       241.23 o
  15   7   5        384.69        699.51       233.17 o
  16   7   5        516.32        831.43       257.31 o
 -15   8   5        344.57        391.15       184.52 o
 -14   8   5        150.85        213.43       154.75 o
 -13   8   5       3723.16       3010.78       428.84 o
 -12   8   5       1205.82       1383.09       293.68 o
 -11   8   5       1463.28       1713.44       309.45 o
 -10   8   5        144.89         53.46       112.55 o
  -9   8   5       4222.66       3780.64       435.41 o
  -8   8   5        271.59        386.75        82.08 o
  -7   8   5       8684.21      10041.53       317.43 o
  -6   8   5       4937.73       5807.25       482.59 o
  -5   8   5       1203.75       1051.72       226.60 o
  -4   8   5      12633.45      10628.70       620.74 o
  -3   8   5       3139.37       3328.75       179.42 o
  -2   8   5      15868.36      15912.97       386.11 o
  -1   8   5       4394.98       3811.49       226.52 o
   0   8   5       1335.53       1876.89       123.69 o
   1   8   5       3432.65       3523.45       615.30 o
   2   8   5      13819.96      14321.76       528.95 o
   3   8   5       4160.92       3484.41       161.11 o
   4   8   5      12400.94      10765.97       636.08 o
   5   8   5       1256.89       1010.34       145.45 o
   6   8   5       4832.32       4479.76       286.12 o
   7   8   5       8984.69       9719.62       422.40 o
   8   8   5        247.22        421.23       110.45 o
   9   8   5       4136.52       3210.60       407.93 o
  10   8   5         26.27        159.16       135.85 o
  11   8   5       1098.43       1130.81       261.48 o
  12   8   5       1579.09       1852.73       338.43 o
  13   8   5       3972.56       3307.25       436.18 o
  14   8   5        158.75        393.91       181.28 o
  15   8   5        279.95        127.43       140.29 o
 -15   9   5        538.67        524.68       225.15 o
 -14   9   5        417.82        153.57       167.24 o
 -13   9   5        993.98       1548.48       317.74 o
 -12   9   5       7696.09       6831.70       606.47 o
 -11   9   5        743.10       1000.15       256.17 o
 -10   9   5       1315.86       2159.88       362.53 o
  -9   9   5       2266.16       2289.95       359.24 o
  -8   9   5       1283.98       1223.70       251.50 o
  -7   9   5       1361.99       1214.63       260.79 o
  -6   9   5        112.11        273.33       168.82 o
  -5   9   5       1143.68       1635.43       188.32 o
  -4   9   5       3114.12       3063.51       239.15 o
  -3   9   5        595.28        641.80        94.68 o
  -2   9   5       7336.03       8493.72       337.86 o
  -1   9   5       1571.22       1519.87       118.40 o
   0   9   5         42.85         29.37        44.62 o
   1   9   5       1946.35       2288.09       287.36 o
   2   9   5       5995.56       7105.33       566.09 o
   3   9   5        573.19        568.80       132.72 o
   4   9   5       4209.42       4217.85       446.30 o
   5   9   5       1626.36       2380.00       343.05 o
   6   9   5        178.54        234.30        98.29 o
   7   9   5       1826.38       2062.42       405.87 o
   8   9   5       1413.47       1516.51       180.15 o
   9   9   5       2529.48       2361.40       375.04 o
  10   9   5       1115.55       1461.53       313.79 o
  11   9   5        839.58        809.99       242.52 o
  12   9   5       7190.17       6409.52       596.94 o
  13   9   5       1008.38       1367.50       313.32 o
  14   9   5        413.91        211.87       166.84 o
  15   9   5        466.64        350.97       188.96 o
 -14  10   5        433.27        700.73       247.65 o
 -13  10   5        879.68       1054.87       292.77 o
 -12  10   5       1914.16       1842.98       352.17 o
 -11  10   5       1630.48       2218.15       378.68 o
 -10  10   5        278.62        508.53       205.42 o
  -9  10   5       2336.01       2308.39       373.72 o
  -8  10   5         86.08        260.45       169.22 o
  -7  10   5        587.36        505.48       209.11 o
  -6  10   5       3827.21       3255.78       399.41 o
  -5  10   5       1180.55       1211.75       174.24 o
  -4  10   5       1765.13       1804.93       198.09 o
  -3  10   5       8057.03       7548.07       307.10 o
  -2  10   5       8291.54       8732.29       401.95 o
  -1  10   5       4525.94       5569.29       221.95 o
   0  10   5      13212.35      11633.54       341.09 o
   1  10   5       4882.22       5257.69       369.46 o
   2  10   5       8215.26       8122.48       647.87 o
   3  10   5       8305.18       8199.85       343.29 o
   4  10   5       2305.16       2565.72       372.29 o
   5  10   5       1043.35        789.40       224.10 o
   6  10   5       4300.26       3750.55       427.45 o
   7  10   5        415.55        304.67       132.08 o
   8  10   5        114.21        194.54       163.99 o
   9  10   5       2751.77       3147.59       420.59 o
  10  10   5        243.95        324.00       196.97 o
  11  10   5       1375.63       1618.22       319.06 o
  12  10   5       2009.05       1803.26       342.14 o
  13  10   5        721.54        861.73       267.81 o
  14  10   5        345.03        551.54       219.89 o
 -13  11   5        105.18        192.53       182.88 o
 -12  11   5         92.75        143.49       180.47 o
 -11  11   5       1000.50       1139.87       275.51 o
 -10  11   5       2547.08       2648.27       416.01 o
  -9  11   5       4429.39       5004.73       542.14 o
  -8  11   5       1321.58        883.59       260.73 o
  -7  11   5        457.33        797.71       248.48 o
  -6  11   5       1784.24       2562.00       366.75 o
  -5  11   5        765.99        851.87       242.93 o
  -4  11   5       3899.33       3497.50       407.51 o
  -3  11   5        388.53        718.64       110.37 o
  -2  11   5       2762.83       3129.87       224.23 o
  -1  11   5       1607.56       1566.99       127.66 o
   0  11   5        189.78        307.42        60.97 o
   1  11   5       1467.48       1620.42       183.02 o
   2  11   5       2740.19       2754.89       514.31 o
   3  11   5        654.84       1045.44       143.51 o
   4  11   5       3597.92       3384.56       434.41 o
   5  11   5       1007.03        869.77       248.22 o
   6  11   5       1744.45       2137.61       355.06 o
   7  11   5        373.33        710.81       238.81 o
   8  11   5        903.59        640.73       242.14 o
   9  11   5       3999.05       5765.47       575.42 o
  10  11   5       2715.92       3538.75       474.87 o
  11  11   5        921.88        995.41       270.67 o
  12  11   5         71.23         80.79       133.04 o
  13  11   5         72.81        130.22       168.00 o
 -13  12   5        358.88        504.92       221.10 o
 -12  12   5         78.12         49.04       129.82 o
 -11  12   5        169.55        233.54       157.97 o
 -10  12   5       1993.37       2467.82       401.71 o
  -9  12   5         69.14        179.66       178.86 o
  -8  12   5       4062.21       4304.25       523.01 o
  -7  12   5       7834.51       7680.21       671.20 o
  -6  12   5       2921.38       2827.03       411.00 o
  -5  12   5       1492.68       1242.77       288.16 o
  -4  12   5       2185.89       1973.77       367.69 o
  -3  12   5       1280.31       1317.33       194.21 o
  -2  12   5        293.01        379.25        99.31 o
  -1  12   5       9125.68      10131.43       322.74 o
   0  12   5       1251.35       1680.51       151.54 o
   1  12   5       7563.32       8189.56       403.55 o
   2  12   5        351.84        453.32       143.43 o
   3  12   5       1211.64       1280.08       167.58 o
   4  12   5       2151.15       1499.71       323.78 o
   5  12   5       1832.18       1349.03       297.10 o
   6  12   5       2908.10       2308.82       369.49 o
   7  12   5       8627.35       8179.66       691.89 o
   8  12   5       3533.34       3314.46       458.70 o
   9  12   5         46.83        169.21       161.57 o
  10  12   5       2179.52       3109.87       455.71 o
  11  12   5         75.27        213.83       172.83 o
  12  12   5        133.83        266.49       165.60 o
  13  12   5        461.91        555.61       240.82 o
 -12  13   5        933.97       1330.75       345.05 o
 -11  13   5        387.06        420.11       213.47 o
 -10  13   5        235.76        407.20       219.08 o
  -9  13   5       2215.48       2052.75       376.01 o
  -8  13   5        218.53        183.30       171.24 o
  -7  13   5        788.36       1257.15       310.87 o
  -6  13   5        266.58        553.55       218.68 o
  -5  13   5        995.28       1557.50       333.06 o
  -4  13   5       2634.80       2515.80       258.62 o
  -3  13   5       1581.95       1468.30       208.81 o
  -2  13   5       3686.88       3170.66       188.57 o
  -1  13   5       2318.97       2567.02       172.87 o
   0  13   5         44.77         38.50        82.49 o
   1  13   5       2391.60       2562.95       238.84 o
   2  13   5       3790.34       2807.22       248.05 o
   3  13   5       1579.71       1337.42       303.87 o
   4  13   5       2388.78       2285.59       405.97 o
   5  13   5       1338.16       2323.66       396.73 o
   6  13   5        183.12        353.33       192.54 o
   7  13   5        963.72        962.51       265.46 o
   8  13   5        255.16        258.48       166.02 o
   9  13   5       2229.85       2288.68       395.34 o
  10  13   5        330.19        431.35       203.41 o
  11  13   5        288.55        272.55       160.79 o
  12  13   5        813.65       1078.91       307.63 o
 -11  14   5         77.50        186.09       188.10 o
 -10  14   5         35.78       -189.30       189.30 o
  -9  14   5       2637.43       2256.58       416.77 o
  -8  14   5        899.88       1133.33       314.90 o
  -7  14   5       2165.70       2066.01       396.13 o
  -6  14   5       1018.44       1365.16       337.47 o
  -5  14   5        779.48        960.35       254.97 o
  -4  14   5        435.57        625.59       268.57 o
  -3  14   5       1889.83       1727.62       200.68 o
  -2  14   5         57.89         76.52        85.41 o
  -1  14   5       1470.90       1515.93       166.35 o
   0  14   5        911.15        356.12       178.57 o
   1  14   5       1384.37       1503.51       192.16 o
   2  14   5        143.73        165.34       100.36 o
   3  14   5       2110.10       1999.20       215.19 o
   4  14   5        357.36        729.27       279.00 o
   5  14   5        774.26        830.85       239.69 o
   6  14   5       1117.38       1566.80       353.59 o
   7  14   5       1831.25       1581.31       347.33 o
   8  14   5       1048.35       1018.02       297.24 o
   9  14   5       2290.00       2035.80       400.56 o
  10  14   5         32.26         51.04       155.14 o
  11  14   5        115.37        108.12       155.95 o
 -10  15   5        299.38        304.30       205.01 o
  -9  15   5        472.27        240.02       204.64 o
  -8  15   5        110.19        510.86       247.99 o
  -7  15   5        660.44        975.89       309.62 o
  -6  15   5         38.81        -38.18       156.35 o
  -5  15   5        276.32        -49.44       157.18 o
  -4  15   5        912.95        993.41       318.13 o
  -3  15   5        132.51        264.46       439.93 o
  -2  15   5       1996.73       2348.46       336.92 o
  -1  15   5        832.35       1061.44       145.98 o
   0  15   5        316.76        295.83       104.50 o
   1  15   5        475.50        451.15       110.02 o
   2  15   5       2157.02       2198.23       237.66 o
   3  15   5        121.53         46.06       110.53 o
   4  15   5       1152.64       1087.87       563.98 o
   5  15   5        227.72        -89.64       196.97 o
   6  15   5         34.30          8.04       152.73 o
   7  15   5        738.37        968.31       299.98 o
   8  15   5        147.32        196.55       187.31 o
   9  15   5        423.46        488.86       235.59 o
  10  15   5        240.71        371.42       204.60 o
  -8  16   5       1410.80       1667.50       397.06 o
  -7  16   5        772.70       1070.05       341.80 o
  -6  16   5        142.86        499.62       237.15 o
  -5  16   5        456.93        887.70       297.11 o
  -4  16   5        177.63        241.83       144.57 o
  -3  16   5       1836.37       2699.58       532.65 o
  -2  16   5        735.50        616.10       166.03 o
  -1  16   5         10.35        174.20       110.70 o
   0  16   5        681.74        841.17       131.06 o
   1  16   5         26.00         15.49        90.15 o
   2  16   5        855.63       1023.32       163.45 o
   3  16   5       1492.40       1849.89       266.05 o
   4  16   5        224.73        151.55       107.92 o
   5  16   5        460.31        846.69       283.84 o
   6  16   5        147.16        281.76       190.92 o
   7  16   5        839.92       1000.12       321.31 o
   8  16   5       1353.10       1800.99       412.74 o
  -6  17   5        229.46        288.21       208.22 o
  -5  17   5        696.97        337.54       203.26 o
  -4  17   5       1109.79       1049.70       450.08 o
  -3  17   5        194.82        282.46       149.37 o
  -2  17   5        977.10        971.18       218.33 o
  -1  17   5        496.29        488.50       164.42 o
   0  17   5        485.70        922.69       227.72 o
   1  17   5        353.41        228.06       127.33 o
   2  17   5        972.93        979.05       222.59 o
   3  17   5        192.09        229.76       133.96 o
   4  17   5        966.93        918.57       452.65 o
   5  17   5        618.63        603.80       188.93 o
   6  17   5        183.59        304.28       217.06 o
  -3  18   5         46.28         47.94       122.43 o
  -2  18   5        576.04        504.05       185.17 o
  -1  18   5        180.43        129.83       130.47 o
   0  18   5        145.00        107.13       118.93 o
   1  18   5        215.15        -14.59       109.29 o
   2  18   5        586.31        662.44       273.61 o
   3  18   5         61.46        161.38       220.45 o
   0   0   6        170.91        312.79        40.96 o
   1   0   6       7045.66       5973.11       334.77 o
   2   0   6      10433.59       7303.78       113.22 o
   3   0   6        625.00       1353.24        82.42 o
   4   0   6       3785.07       2275.89        94.17 o
   5   0   6      21374.28      21118.54       306.71 o
   6   0   6        481.21        562.57        69.57 o
   7   0   6       8711.89       8833.13       324.65 o
   8   0   6      17615.29      17636.17       479.65 o
   9   0   6       3480.78       3698.94       241.44 o
  10   0   6        306.06        202.43        88.98 o
  11   0   6        121.00        321.03       106.68 o
  12   0   6         29.82        333.13       102.47 o
  13   0   6         12.53        137.07        96.73 o
  14   0   6         59.14        104.89        86.82 o
  15   0   6         53.97        322.68       113.71 o
  16   0   6        246.02        217.60       103.90 o
  17   0   6          0.77        192.52       112.95 o
 -17   1   6        750.60        763.12       176.20 o
 -16   1   6       1643.49       1402.63       211.67 o
 -15   1   6       2177.98       2091.36       233.24 o
 -14   1   6        629.81        753.47       144.85 o
 -13   1   6        219.91        173.45        89.49 o
 -12   1   6       1471.44       1250.68       173.70 o
 -11   1   6        243.90        392.89       114.17 o
 -10   1   6        126.06        429.49       108.12 o
  -9   1   6       1130.31       1348.28       151.01 o
  -8   1   6      26490.76      21890.24       537.46 o
  -7   1   6       6153.66       5666.75       257.20 o
  -6   1   6       1956.11       1199.29        83.95 o
  -5   1   6      19249.07      19376.60       398.37 o
  -4   1   6     111445.09     133843.83       781.59 o
  -3   1   6      41266.03      39309.39       390.27 o
  -2   1   6      38346.30      28759.38       654.53 o
  -1   1   6      32681.82      19127.21       484.04 o
   0   1   6      20378.05      14578.19       359.60 o
   1   1   6      31371.27      18562.33       261.56 o
   2   1   6      40410.32      32626.30       916.50 o
   3   1   6      38935.03      38178.88       838.28 o
   4   1   6     109067.05     128754.06       736.75 o
   5   1   6      16915.50      17332.99       419.57 o
   6   1   6        881.51        565.72        62.89 o
   7   1   6       5978.29       6280.51       451.78 o
   8   1   6      26401.85      21286.06       533.14 o
   9   1   6       1143.29       1123.20       140.54 o
  10   1   6        327.52        310.91        96.13 o
  11   1   6        223.21        235.84        86.08 o
  12   1   6       1012.49        939.59       166.55 o
  13   1   6        154.80        119.78        88.88 o
  14   1   6        439.63        596.79       134.97 o
  15   1   6       2101.84       2298.94       245.52 o
  16   1   6       1493.04       1378.04       213.30 o
  17   1   6        661.03        816.41       176.02 o
 -17   2   6        518.58        372.86       133.12 o
 -16   2   6       1631.51       1923.68       240.63 o
 -15   2   6        537.86        378.30       115.98 o
 -14   2   6       3084.06       2991.19       267.06 o
 -13   2   6        667.79        624.04       135.70 o
 -12   2   6       1617.74       2056.80       212.46 o
 -11   2   6        436.15        351.50       134.29 o
 -10   2   6      17072.42      15848.69       514.39 o
  -9   2   6       1087.55       1510.66       169.64 o
  -8   2   6      11149.98      10422.69       494.66 o
  -7   2   6       3913.51       3586.80       215.32 o
  -6   2   6      27677.26      24378.48       487.36 o
  -5   2   6      24548.82      19338.65       302.13 o
  -4   2   6      30898.35      27633.16       662.32 o
  -3   2   6       1512.37       2339.04       178.73 o
  -2   2   6       9134.62       9798.06       236.05 o
  -1   2   6      23653.87      21782.07       263.19 o
   0   2   6        268.66        205.57        31.67 o
   1   2   6      22665.69      20684.84       278.12 o
   2   2   6       6404.48       7165.98       201.97 o
   3   2   6       1363.28       2129.17       109.46 o
   4   2   6      30138.82      27154.69       419.72 o
   5   2   6      24759.10      19710.31       306.75 o
   6   2   6      28901.24      25714.70       434.01 o
   7   2   6       4748.61       4284.88       236.53 o
   8   2   6       9364.74       8788.53       348.46 o
   9   2   6       1421.36       1879.45       241.75 o
  10   2   6      19700.15      17577.79       546.54 o
  11   2   6        361.54        391.78       107.51 o
  12   2   6       1520.79       1906.13       205.32 o
  13   2   6        813.03        698.81       140.55 o
  14   2   6       3517.63       3511.80       290.20 o
  15   2   6        709.35        667.08       189.00 o
  16   2   6       1833.52       2149.90       251.69 o
  17   2   6        547.93        484.64       135.63 o
 -17   3   6       1106.94        835.80       179.60 o
 -16   3   6        111.90          9.76        91.62 o
 -15   3   6        757.73        567.84       140.17 o
 -14   3   6       1440.79       1458.11       201.55 o
 -13   3   6        417.41        386.33       118.86 o
 -12   3   6       2329.14       2747.73       241.87 o
 -11   3   6      13213.94      11497.28       463.17 o
 -10   3   6       5918.01       5716.52       319.82 o
  -9   3   6       2407.69       2262.21       195.93 o
  -8   3   6       3084.31       3095.71       217.89 o
  -7   3   6       8886.03       7801.15       315.81 o
  -6   3   6       6410.39       6098.13       261.06 o
  -5   3   6        578.91        276.43        63.25 o
  -4   3   6      14180.70      16201.34       349.24 o
  -3   3   6      34441.80      37210.27       885.48 o
  -2   3   6     124017.85     138729.50      1157.30 o
  -1   3   6       4909.58       6013.12       201.90 o
   0   3   6      31084.82      13646.24       423.86 o
   1   3   6       3828.54       5237.04       238.21 o
   2   3   6     114041.03     131927.70      1505.00 o
   3   3   6      33729.37      37681.13       795.07 o
   4   3   6      14644.71      16606.54       487.41 o
   5   3   6        368.25        599.97        80.57 o
   6   3   6       5110.48       4832.04       237.36 o
   7   3   6       8941.32       8292.31       641.05 o
   8   3   6       2693.41       2515.11       194.10 o
   9   3   6       2228.29       2099.18       193.45 o
  10   3   6       5533.69       5214.53       308.97 o
  11   3   6      12654.59      11784.15       469.63 o
  12   3   6       2780.08       2879.43       247.27 o
  13   3   6        275.53        338.92       114.23 o
  14   3   6       1746.73       1685.04       214.28 o
  15   3   6        888.17        578.05       147.83 o
  16   3   6        153.19         28.48        84.69 o
  17   3   6       1059.60        872.67       181.03 o
 -16   4   6        373.71        545.44       152.27 o
 -15   4   6        955.11        966.93       176.66 o
 -14   4   6        312.52        437.55       153.36 o
 -13   4   6       2654.85       2299.71       322.64 o
 -12   4   6       3687.82       3619.76       280.60 o
 -11   4   6       3216.05       3100.47       434.39 o
 -10   4   6       2811.59       2674.30       224.55 o
  -9   4   6      24727.62      24022.98       630.89 o
  -8   4   6       4413.83       3118.40       320.85 o
  -7   4   6       1850.74       1433.18       211.94 o
  -6   4   6      17985.84      17749.83       673.97 o
  -5   4   6      29686.62      32419.38       504.48 o
  -4   4   6       2340.17       2873.70       216.58 o
  -3   4   6       8293.43       6563.90       260.47 o
  -2   4   6       9416.67      10724.43       514.01 o
  -1   4   6      45935.39      51518.92       557.92 o
   0   4   6      12070.68      11585.79       307.49 o
   1   4   6      54342.73      61844.78      1914.78 o
   2   4   6       8234.59      10272.17       338.64 o
   3   4   6       8177.24       6339.19       187.03 o
   4   4   6       2989.96       3241.23       194.77 o
   5   4   6      33697.10      36212.87       739.91 o
   6   4   6      16625.09      15944.67       640.11 o
   7   4   6       2547.26       2273.00       266.58 o
   8   4   6       4014.24       2790.93       304.13 o
   9   4   6      23903.25      23144.62       625.66 o
  10   4   6       3040.73       2705.90       274.76 o
  11   4   6       3098.95       3205.78       318.45 o
  12   4   6       4175.82       4571.61       314.35 o
  13   4   6       2322.31       1949.93       224.16 o
  14   4   6        208.38        261.41       112.23 o
  15   4   6        911.40        875.42       241.31 o
  16   4   6        424.97        406.16       128.22 o
 -16   5   6        207.40        353.33       186.91 o
 -15   5   6        128.93        140.28       149.92 o
 -14   5   6       1056.79        905.43       239.73 o
 -13   5   6       1526.38       1847.06       308.65 o
 -12   5   6       1627.76       1669.08       289.78 o
 -11   5   6       1375.05       1437.45       255.54 o
 -10   5   6        504.99        659.86       186.18 o
  -9   5   6       2346.57       1896.19       268.35 o
  -8   5   6       3291.36       3379.04       338.51 o
  -7   5   6      13676.05      12375.14       619.55 o
  -6   5   6      10097.81       9442.41       529.08 o
  -5   5   6        423.08       1180.37       222.80 o
  -4   5   6       5280.07       6777.93       350.78 o
  -3   5   6       4752.35       6238.79       280.81 o
  -2   5   6      30881.06      40483.63       538.07 o
  -1   5   6       6526.27       7615.59       271.35 o
   0   5   6       1398.96        796.81       110.46 o
   1   5   6       8244.03       9209.43       642.63 o
   2   5   6      33723.59      45118.29       866.13 o
   3   5   6       5847.36       6720.91       208.54 o
   4   5   6       5432.55       7087.42       539.87 o
   5   5   6        837.16       1383.95       231.40 o
   6   5   6       9128.86       8084.83       494.59 o
   7   5   6      12985.63      11701.73       608.40 o
   8   5   6       3686.60       3610.69       349.16 o
   9   5   6       2961.62       2921.18       332.64 o
  10   5   6        588.39        420.64       166.49 o
  11   5   6       2052.83       2281.57       310.87 o
  12   5   6       1561.84       1630.75       284.94 o
  13   5   6       1581.75       2374.73       350.51 o
  14   5   6       1208.07        927.66       244.59 o
  15   5   6        117.14        414.00       202.58 o
  16   5   6        167.78        476.71       202.99 o
 -16   6   6        198.49        471.90       215.85 o
 -15   6   6        151.00        215.04       163.19 o
 -14   6   6       3968.61       3116.50       418.03 o
 -13   6   6       1137.48       1269.97       255.85 o
 -12   6   6        459.63        443.88       182.54 o
 -11   6   6        706.10        486.62       181.78 o
 -10   6   6       2416.99       2395.34       330.34 o
  -9   6   6       6381.13       6081.19       494.39 o
  -8   6   6       6288.24       5000.18       445.22 o
  -7   6   6       2513.45       2474.03       301.95 o
  -6   6   6      12806.61      13255.87       673.44 o
  -5   6   6       8324.14       7720.05       493.69 o
  -4   6   6       2131.26       2025.00       255.24 o
  -3   6   6       9682.41       9488.98      1853.12 o
  -2   6   6      23696.51      28783.49       664.75 o
  -1   6   6      62842.95      64746.82       857.72 o
   0   6   6        100.28        124.23        41.11 o
   1   6   6      62399.13      64405.47      1855.95 o
   2   6   6      27163.85      33301.02       822.63 o
   3   6   6      10505.03      12254.65       364.34 o
   4   6   6       2697.72       2892.91       172.52 o
   5   6   6       9738.55       9024.46       367.12 o
   6   6   6      13235.20      14144.63       682.39 o
   7   6   6       3248.83       2574.28       317.55 o
   8   6   6       5981.13       4830.97       436.57 o
   9   6   6       5945.63       5536.16       473.55 o
  10   6   6       2092.22       2294.31       320.97 o
  11   6   6        497.89        480.49       176.92 o
  12   6   6        766.34        648.70       199.07 o
  13   6   6       1097.00       1307.75       282.39 o
  14   6   6       3414.20       2671.95       384.82 o
  15   6   6        118.50        163.59       159.57 o
  16   6   6        338.68        470.74       205.42 o
 -16   7   6        229.44        542.25       227.92 o
 -15   7   6        985.63        835.74       255.79 o
 -14   7   6       1115.63       1094.89       265.88 o
 -13   7   6       3698.65       3428.11       436.93 o
 -12   7   6       2079.68       1904.69       318.86 o
 -11   7   6        364.54        421.33       176.89 o
 -10   7   6       2613.98       2150.61       347.29 o
  -9   7   6       1297.29       1088.56       231.39 o
  -8   7   6        709.95        978.58       213.98 o
  -7   7   6      13487.83      13807.69       720.64 o
  -6   7   6      21510.41      19788.86       854.04 o
  -5   7   6      16708.64      15384.79       737.09 o
  -4   7   6      43481.62      47328.09      1277.91 o
  -3   7   6       1986.19       2269.18       137.46 o
  -2   7   6      10192.17      13229.02       295.38 o
  -1   7   6      19043.78      17979.88       915.68 o
   0   7   6        156.31        449.13       107.81 o
   1   7   6      19060.28      18882.77       811.77 o
   2   7   6      12170.96      15457.61       521.24 o
   3   7   6       1855.28       2146.42       400.19 o
   4   7   6      46929.27      52023.17      2931.04 o
   5   7   6      17953.35      15473.63       504.89 o
   6   7   6      23379.04      21459.93       599.19 o
   7   7   6      15111.07      14464.98       741.15 o
   8   7   6        552.53        515.14       160.05 o
   9   7   6        822.14        779.13       206.75 o
  10   7   6       2869.72       2280.08       354.22 o
  11   7   6        352.45        417.31       181.32 o
  12   7   6       1687.51       1480.68       285.35 o
  13   7   6       3002.00       2525.88       386.33 o
  14   7   6        967.93        898.50       243.33 o
  15   7   6       1220.94        948.51       268.70 o
  16   7   6        213.94        373.02       201.79 o
 -15   8   6        796.76        585.50       228.01 o
 -14   8   6        851.83        818.78       241.69 o
 -13   8   6        942.48       1137.81       279.12 o
 -12   8   6        252.91        676.54       229.53 o
 -11   8   6        115.96        137.46       170.02 o
 -10   8   6        277.66        271.76       149.95 o
  -9   8   6        939.47       1031.81       240.15 o
  -8   8   6       1491.50       1238.95       190.99 o
  -7   8   6       1491.13       1279.80       109.11 o
  -6   8   6        460.01        521.95       175.72 o
  -5   8   6      13069.42      13272.27       711.11 o
  -4   8   6       4604.73       4130.70       252.87 o
  -3   8   6       4172.13       4026.81       216.24 o
  -2   8   6        869.51        824.53        92.53 o
  -1   8   6      12543.69      12283.65       410.90 o
   0   8   6       6045.20       7946.21       247.28 o
   1   8   6      10873.82      10827.48       476.19 o
   2   8   6       1166.99       1009.91       160.24 o
   3   8   6       4253.81       3576.37       259.69 o
   4   8   6       4215.73       4360.69       351.53 o
   5   8   6      12938.30      12119.68       476.05 o
   6   8   6        469.65        422.87        99.45 o
   7   8   6       1758.91       1658.21       187.40 o
   8   8   6       1114.56        866.86       144.11 o
   9   8   6       1148.72       1104.44       233.36 o
  10   8   6        373.53        373.90       174.89 o
  11   8   6         49.96         69.53       126.61 o
  12   8   6        230.45        426.10       188.13 o
  13   8   6       1105.56       1241.73       280.77 o
  14   8   6        801.76        497.85       202.68 o
  15   8   6        665.74        633.69       226.38 o
 -15   9   6        441.13        637.61       227.14 o
 -14   9   6        316.45        372.25       198.59 o
 -13   9   6       2355.37       2258.22       371.20 o
 -12   9   6        550.00        634.08       224.76 o
 -11   9   6       1237.13       1102.33       285.64 o
 -10   9   6       3046.90       3159.61       413.03 o
  -9   9   6       1331.06       1700.91       304.61 o
  -8   9   6       1602.97       1250.64       267.68 o
  -7   9   6        168.58        180.08       116.57 o
  -6   9   6      10421.02       9553.98       659.50 o
  -5   9   6      11218.90      10559.68       692.17 o
  -4   9   6       2086.60       1761.86       175.50 o
  -3   9   6       7199.28       8458.81       302.12 o
  -2   9   6       3321.83       4273.55       247.95 o
  -1   9   6      19359.55      18075.85       421.53 o
   0   9   6        198.81        186.57       105.01 o
   1   9   6      21371.04      19810.69       725.12 o
   2   9   6       3127.66       4083.57       428.49 o
   3   9   6       8611.19      10109.62       332.21 o
   4   9   6       1599.74       1388.36       263.34 o
   5   9   6       9842.90      10055.64       467.57 o
   6   9   6       9683.72       9481.32       625.09 o
   7   9   6        364.58        371.30       109.21 o
   8   9   6       1384.51       1365.47       261.99 o
   9   9   6       1336.18       1887.22       319.90 o
  10   9   6       2732.20       2645.52       381.90 o
  11   9   6       1090.14        877.74       249.81 o
  12   9   6        459.13        499.34       207.46 o
  13   9   6       2584.08       2486.92       384.96 o
  14   9   6        237.09        568.39       231.13 o
  15   9   6        301.79        167.63       135.07 o
 -14  10   6         69.76        163.98       154.34 o
 -13  10   6        292.78        274.56       175.27 o
 -12  10   6       1193.55       1368.91       308.54 o
 -11  10   6       6392.84       6539.99       623.66 o
 -10  10   6       1105.32       1327.50       292.05 o
  -9  10   6        791.29        813.21       231.66 o
  -8  10   6       1848.75       1294.29       275.77 o
  -7  10   6        714.11        459.29       189.02 o
  -6  10   6       2264.71       3096.41       391.53 o
  -5  10   6        770.15        873.31       138.37 o
  -4  10   6       5476.00       5436.96       330.01 o
  -3  10   6       3061.71       2744.48       253.66 o
  -2  10   6        532.01        658.89       116.84 o
  -1  10   6      13043.97      11009.32       311.68 o
   0  10   6       6563.33       5565.58       239.89 o
   1  10   6      12624.51      11133.11       536.40 o
   2  10   6        274.06        464.75       177.70 o
   3  10   6       3557.69       3655.14       564.89 o
   4  10   6       4599.65       4662.98       500.83 o
   5  10   6        742.19        883.67       224.44 o
   6  10   6       2053.76       2723.05       309.29 o
   7  10   6        832.54        817.72       238.52 o
   8  10   6       1802.84       1273.31       269.31 o
   9  10   6        855.17        693.40       217.59 o
  10  10   6       1607.22       1592.85       319.54 o
  11  10   6       6393.07       6648.24       626.09 o
  12  10   6       1276.32       1137.28       285.22 o
  13  10   6        257.85         55.47       141.09 o
  14  10   6         29.72        127.00       158.35 o
 -13  11   6         79.63          3.62       149.11 o
 -12  11   6        348.52        369.85       182.51 o
 -11  11   6       1105.14       1059.51       273.93 o
 -10  11   6       1257.21        912.83       263.51 o
  -9  11   6       1146.77       1179.90       295.28 o
  -8  11   6        496.85        972.22       254.51 o
  -7  11   6       1352.64       1901.71       364.57 o
  -6  11   6       4077.59       4353.06       485.33 o
  -5  11   6       2559.80       2527.50       241.29 o
  -4  11   6       1695.13       1864.72       213.68 o
  -3  11   6       1265.08       1114.17       129.91 o
  -2  11   6        864.00        936.84       139.71 o
  -1  11   6       4175.35       4598.85       209.52 o
   0  11   6       9737.07       8816.58       306.84 o
   1  11   6       4305.55       4276.83       285.24 o
   2  11   6        862.22        684.21       154.94 o
   3  11   6       1370.05       1295.39       150.74 o
   4  11   6       1482.31       1487.64       311.94 o
   5  11   6       2305.64       2318.53       362.52 o
   6  11   6       5061.59       5433.98       531.00 o
   7  11   6       1419.22       1789.15       356.14 o
   8  11   6        515.98        555.68       207.48 o
   9  11   6       1038.77        831.05       252.21 o
  10  11   6       1081.35       1311.33       305.31 o
  11  11   6       1149.30       1057.13       279.57 o
  12  11   6        407.99        556.80       215.48 o
  13  11   6         75.49         12.86       139.87 o
 -13  12   6        483.11        329.27       205.44 o
 -12  12   6        153.69        383.46       194.54 o
 -11  12   6        255.72        223.50       158.38 o
 -10  12   6         89.29         16.88       131.03 o
  -9  12   6        315.38         73.57       132.26 o
  -8  12   6        302.13        308.74       202.61 o
  -7  12   6        992.84       1353.15       328.63 o
  -6  12   6       3939.81       3214.27       436.77 o
  -5  12   6        141.36        234.34       174.45 o
  -4  12   6       1827.94       2149.83       376.42 o
  -3  12   6       5837.98       6269.91       401.29 o
  -2  12   6       1838.60       1497.75       125.34 o
  -1  12   6       3099.46       2983.36       179.73 o
   0  12   6         62.60        295.43       104.88 o
   1  12   6       2444.93       2505.77       236.33 o
   2  12   6       1739.04       1299.69       168.73 o
   3  12   6       5732.69       6521.84       343.28 o
   4  12   6       1902.27       1811.38       351.89 o
   5  12   6        126.24        134.65       132.64 o
   6  12   6       3478.02       2588.12       390.23 o
   7  12   6        668.77        636.58       250.93 o
   8  12   6        319.80        545.13       236.78 o
   9  12   6        294.34        377.07       186.53 o
  10  12   6         19.07         88.02       135.85 o
  11  12   6        288.76        151.55       161.20 o
  12  12   6        109.77         96.46       165.20 o
  13  12   6        363.02        314.37       203.41 o
 -12  13   6        785.59        669.53       276.66 o
 -11  13   6        428.25        662.14       247.25 o
 -10  13   6         97.21        473.88       212.62 o
  -9  13   6       1277.20       1154.18       287.64 o
  -8  13   6       1930.08       2075.75       374.74 o
  -7  13   6       1406.13       1529.77       346.43 o
  -6  13   6        233.80         99.29       151.55 o
  -5  13   6       1452.05       1181.46       276.85 o
  -4  13   6        691.96        750.41       259.39 o
  -3  13   6        245.97        137.11       101.31 o
  -2  13   6        916.64       1128.48       113.46 o
  -1  13   6        933.25       1089.77       114.97 o
   0  13   6       3459.38       3617.92       218.31 o
   1  13   6       1032.05       1464.31       189.06 o
   2  13   6        736.57        664.23       155.12 o
   3  13   6        358.92        514.60       215.89 o
   4  13   6        664.16        751.19       251.74 o
   5  13   6       1549.84       1466.08       309.88 o
   6  13   6        364.56        285.04       188.95 o
   7  13   6       1568.13       1503.41       337.62 o
   8  13   6       1581.41       1594.72       337.21 o
   9  13   6       1510.44       1580.48       337.18 o
  10  13   6        126.39        502.03       220.26 o
  11  13   6        304.66        661.68       255.26 o
  12  13   6        820.88        683.62       264.60 o
 -11  14   6        276.42        963.14       289.02 o
 -10  14   6        216.72         55.07       180.88 o
  -9  14   6        561.67        387.19       209.88 o
  -8  14   6       1117.56       2034.12       398.62 o
  -7  14   6       1124.23       1394.20       330.65 o
  -6  14   6       2307.05       1708.78       371.63 o
  -5  14   6         76.98       -119.77       163.18 o
  -4  14   6        608.03        626.25       157.44 o
  -3  14   6        126.26        194.15        90.97 o
  -2  14   6       1339.25       1188.45       248.45 o
  -1  14   6       2772.67       1832.53       182.60 o
   0  14   6         80.70         88.81        88.08 o
   1  14   6       2793.42       1682.99       206.00 o
   2  14   6       1437.03       1043.46       211.80 o
   3  14   6        261.77        295.99        96.79 o
   4  14   6        721.11        714.61       256.17 o
   5  14   6         93.43        -42.20       166.80 o
   6  14   6       2308.01       1461.97       334.59 o
   7  14   6       1155.58       1522.96       330.26 o
   8  14   6       1148.15       2026.13       386.96 o
   9  14   6        509.51        217.11       170.07 o
  10  14   6        209.11        283.79       200.18 o
  11  14   6        259.66        832.09       292.64 o
 -10  15   6        333.47        765.80       281.40 o
  -9  15   6        224.48        463.07       220.28 o
  -8  15   6        821.83        610.45       243.70 o
  -7  15   6        570.56        775.20       264.56 o
  -6  15   6         30.83         53.05       144.69 o
  -5  15   6         97.76         72.35       162.38 o
  -4  15   6       1950.89       2093.88       432.30 o
  -3  15   6       1782.62       1547.94       697.88 o
  -2  15   6       3273.58       3469.37       307.14 o
  -1  15   6       1208.23       1309.90       162.48 o
   0  15   6         38.75         -4.31        96.76 o
   1  15   6       1260.34       1469.39       198.80 o
   2  15   6       3411.68       3214.91       281.80 o
   3  15   6       1812.80       1395.93       234.54 o
   4  15   6       1894.00       1409.20       189.62 o
   5  15   6         95.06         54.26       159.17 o
   6  15   6         24.75       -171.21       171.21 o
   7  15   6        374.88        226.33       168.04 o
   8  15   6        842.85        746.38       277.48 o
   9  15   6        213.41        246.40       174.85 o
  10  15   6        384.81        897.69       310.35 o
  -8  16   6        129.27        436.10       245.59 o
  -7  16   6        361.85        509.34       258.89 o
  -6  16   6       1145.93        963.35       293.23 o
  -5  16   6        507.36        299.53       196.20 o
  -4  16   6        307.00        444.80       239.19 o
  -3  16   6       2127.99       2716.37       733.84 o
  -2  16   6        195.49        247.40       133.18 o
  -1  16   6        166.52        202.88       113.85 o
   0  16   6         15.35         27.88        89.22 o
   1  16   6        179.60         -0.40        88.90 o
   2  16   6        175.11        230.95        93.55 o
   3  16   6       2099.72       1758.45       260.98 o
   4  16   6        343.49        274.11       127.49 o
   5  16   6        614.07        609.16       244.06 o
   6  16   6       1059.06       1233.97       335.84 o
   7  16   6        330.84        553.95       253.26 o
   8  16   6        153.78        338.04       231.52 o
  -6  17   6          8.54        210.20       176.44 o
  -5  17   6        180.00        188.52       175.25 o
  -4  17   6        339.18        233.44       183.11 o
  -3  17   6        684.23        764.97       208.91 o
  -2  17   6        277.48        521.62       178.78 o
  -1  17   6        226.63        467.35       350.92 o
   0  17   6        119.10        418.96       170.70 o
   1  17   6        179.34        477.67       150.55 o
   2  17   6        226.27         77.81       118.65 o
   3  17   6        542.99        677.79       187.57 o
   4  17   6        278.72        223.40       240.99 o
   5  17   6        197.96        150.26       163.40 o
   6  17   6         15.55       -133.03       168.40 o
  -3  18   6         81.75        -34.80       129.29 o
  -2  18   6        338.31        567.68       202.66 o
  -1  18   6        342.81        190.60       172.66 o
   0  18   6        212.34        163.58       129.66 o
   1  18   6        319.45        334.85       185.92 o
   2  18   6        298.08        287.84       156.30 o
   3  18   6         92.12        -29.79       140.47 o
   1   0   7      26422.97      22884.56       998.82 o
   2   0   7      14938.32      21332.05       437.05 o
   3   0   7      35387.31      19109.59       267.05 o
   4   0   7       2005.33       2323.85        95.97 o
   5   0   7       5549.28       7350.16       186.64 o
   6   0   7      22766.18      20406.04       326.54 o
   7   0   7      26959.57      28072.56       574.08 o
   8   0   7       8044.85       7979.87       418.42 o
   9   0   7       6970.52       8519.50       355.44 o
  10   0   7       9598.88       8299.15       370.16 o
  11   0   7        428.08        418.77       102.74 o
  12   0   7       1026.94        912.57       143.35 o
  13   0   7       5686.77       6397.49       372.96 o
  14   0   7       1528.62       1597.72       207.63 o
  15   0   7         20.16        142.12        89.38 o
  16   0   7       1531.21       1523.36       218.89 o
  17   0   7       1883.54       2015.80       254.88 o
 -17   1   7        383.01        838.00       188.14 o
 -16   1   7        271.31        609.28       152.11 o
 -15   1   7       1600.66       1080.06       195.87 o
 -14   1   7        595.47        391.98       117.02 o
 -13   1   7        954.69        726.35       139.79 o
 -12   1   7       4137.24       3907.03       280.56 o
 -11   1   7       2695.89       3119.87       245.04 o
 -10   1   7       1211.12       1367.45       169.25 o
  -9   1   7       7646.48       8190.71       350.22 o
  -8   1   7      22064.33      22680.59       545.27 o
  -7   1   7      10211.05      10658.36       348.64 o
  -6   1   7       1225.86       1799.53       103.03 o
  -5   1   7       3887.89       2979.06       123.72 o
  -4   1   7      90276.30     102244.68       647.37 o
  -3   1   7      23938.31      16364.98       213.17 o
  -2   1   7      16480.48      21226.49       239.21 o
  -1   1   7       3799.68       5491.04       223.11 o
   0   1   7      16164.02      19552.06       381.27 o
   1   1   7       4755.27       6352.52       268.58 o
   2   1   7      16749.82      18962.53       374.74 o
   3   1   7      26913.55      19225.71       280.32 o
   4   1   7      89215.28     104820.91       831.01 o
   5   1   7       3879.38       2964.37       124.25 o
   6   1   7       1473.07       1737.59       100.21 o
   7   1   7      11745.21      13042.64       387.32 o
   8   1   7      23621.87      23304.80       566.90 o
   9   1   7       8943.69       8873.62       366.42 o
  10   1   7       1428.92       1496.53       173.20 o
  11   1   7       3046.08       3239.57       249.17 o
  12   1   7       4223.03       4164.71       288.30 o
  13   1   7       1306.14       1211.57       176.96 o
  14   1   7        666.16        379.93       119.08 o
  15   1   7       1720.85       1349.07       211.09 o
  16   1   7        294.79        673.31       214.86 o
  17   1   7        425.27        948.69       185.82 o
 -17   2   7        927.95       1263.10       211.80 o
 -16   2   7        184.60        118.32       101.40 o
 -15   2   7        699.69        631.76       137.45 o
 -14   2   7       1844.05       1948.02       225.56 o
 -13   2   7       1590.19       1212.51       179.85 o
 -12   2   7       1643.55       1605.12       186.81 o
 -11   2   7        808.77       1033.26       148.23 o
 -10   2   7       4278.70       4356.01       498.65 o
  -9   2   7       1079.70       1425.11       158.35 o
  -8   2   7       7027.28       8052.44       330.32 o
  -7   2   7       9220.12      10098.77       916.25 o
  -6   2   7       4118.86       4092.52       152.41 o
  -5   2   7       1612.51       1967.38       110.03 o
  -4   2   7      23554.63      26980.20       578.08 o
  -3   2   7      50695.15      55066.52      1102.80 o
  -2   2   7      14138.90      13720.37       333.18 o
  -1   2   7      22876.87      15266.90       224.35 o
   0   2   7      24591.78      27039.61       547.97 o
   1   2   7      24005.54      16172.08       233.68 o
   2   2   7      15421.51      14646.23       858.12 o
   3   2   7      50570.36      55159.85       665.42 o
   4   2   7      24430.17      28106.00       511.08 o
   5   2   7       1451.39       1724.11       123.90 o
   6   2   7       3066.91       3357.23       140.28 o
   7   2   7       8519.09       9863.67       834.56 o
   8   2   7       9357.61      10475.77       381.17 o
   9   2   7        980.39       1170.03       148.75 o
  10   2   7       4441.64       4661.06       286.62 o
  11   2   7        698.89        749.94       124.81 o
  12   2   7       1483.33       1440.17       180.81 o
  13   2   7       1718.21       1480.59       195.66 o
  14   2   7       1555.46       1990.23       230.38 o
  15   2   7        891.76        973.94       162.95 o
  16   2   7        176.24        301.58       127.98 o
  17   2   7        911.69       1120.02       196.77 o
 -17   3   7        151.29        100.90        95.87 o
 -16   3   7        538.08        618.87       155.16 o
 -15   3   7       1587.46       1794.89       223.84 o
 -14   3   7       1419.86       1131.41       197.56 o
 -13   3   7        318.41        229.30       101.32 o
 -12   3   7       1125.57       1433.08       187.65 o
 -11   3   7       6201.66       5294.09       330.08 o
 -10   3   7        485.47        575.23       121.66 o
  -9   3   7       2128.39       2806.36       209.55 o
  -8   3   7       1524.61       2094.68       184.30 o
  -7   3   7       4848.00       3434.59       209.98 o
  -6   3   7      17373.27      15811.16       420.07 o
  -5   3   7      74189.00      76882.68      1197.64 o
  -4   3   7      10275.38       8633.29       229.43 o
  -3   3   7      20824.70      17335.93       388.23 o
  -2   3   7      41415.34      38313.87      1411.77 o
  -1   3   7      26385.29      19177.99       410.69 o
   0   3   7     146581.27     147635.31      2501.18 o
   1   3   7      23937.02      17179.44       282.59 o
   2   3   7      43903.17      42440.36       682.89 o
   3   3   7      18894.18      16398.29       505.53 o
   4   3   7      11318.90       9274.72       238.64 o
   5   3   7      76523.49      75339.77      1442.24 o
   6   3   7      19253.94      16815.43       440.25 o
   7   3   7       3608.97       3087.87       257.72 o
   8   3   7       1710.29       2414.34       197.64 o
   9   3   7       2127.76       3187.47       222.70 o
  10   3   7        397.01        551.76       124.98 o
  11   3   7       5158.70       4621.93       314.58 o
  12   3   7       1484.49       1884.27       209.73 o
  13   3   7        474.98        300.22       108.65 o
  14   3   7       1594.70       1505.22       210.75 o
  15   3   7       1322.85       1522.23       205.60 o
  16   3   7        496.00        520.22       144.28 o
  17   3   7        131.02         90.56       106.85 o
 -16   4   7       2079.91       1636.55       228.26 o
 -15   4   7       2090.87       2349.77       255.31 o
 -14   4   7        654.31        594.22       144.72 o
 -13   4   7       1042.79       1207.56       181.25 o
 -12   4   7        608.96        674.12       145.97 o
 -11   4   7       1548.83       1548.24       183.91 o
 -10   4   7       6404.20       6639.77       584.59 o
  -9   4   7       3423.51       4279.46       271.88 o
  -8   4   7       3786.65       3537.02       333.11 o
  -7   4   7       1761.48       2386.95       263.87 o
  -6   4   7       8557.80       9086.38       490.46 o
  -5   4   7      20487.02      22159.85       416.64 o
  -4   4   7      10753.86      11491.51       361.12 o
  -3   4   7       7250.62       7399.98       343.05 o
  -2   4   7      21219.38      25143.35       426.46 o
  -1   4   7      11296.86      12015.46       268.87 o
   0   4   7      24217.24      20227.79       726.70 o
   1   4   7      11435.01      12468.76       507.09 o
   2   4   7      21914.60      25484.69       382.02 o
   3   4   7       8599.84       8609.19       466.13 o
   4   4   7      11626.21      11926.71      1387.77 o
   5   4   7      23031.42      25575.88       657.07 o
   6   4   7       8411.42       8531.00       475.71 o
   7   4   7       1996.00       2822.12       289.75 o
   8   4   7       3592.99       3034.83       318.90 o
   9   4   7       3932.90       4859.10       292.55 o
  10   4   7       5981.59       5806.02       329.25 o
  11   4   7       1334.69       1677.18       219.32 o
  12   4   7        695.87        673.32       143.27 o
  13   4   7       1215.91       1155.58       178.36 o
  14   4   7        535.81        368.59       120.49 o
  15   4   7       2199.62       3069.46       290.63 o
  16   4   7       2310.64       1917.20       244.78 o
 -16   5   7        965.98       1841.56       356.73 o
 -15   5   7        899.46        978.08       253.77 o
 -14   5   7        162.45         68.33       124.61 o
 -13   5   7        473.77        481.67       202.64 o
 -12   5   7       1427.58       1584.67       303.01 o
 -11   5   7       3011.14       2782.14       354.27 o
 -10   5   7       2323.62       1948.54       286.02 o
  -9   5   7       3236.94       3223.67       355.32 o
  -8   5   7       5071.79       4644.52       403.48 o
  -7   5   7      10544.52       9199.22       532.74 o
  -6   5   7      65738.02      71837.05      1463.47 o
  -5   5   7      44913.73      40786.71      1061.63 o
  -4   5   7       4367.34       6462.02       380.16 o
  -3   5   7       6259.92       8270.41       328.04 o
  -2   5   7       3932.38       4941.69       178.74 o
  -1   5   7      24395.79      23762.58       477.27 o
   0   5   7      63728.79      69406.12       900.30 o
   1   5   7      25054.72      24352.19       621.20 o
   2   5   7       6021.25       5438.91       195.57 o
   3   5   7       5699.07       7467.56       406.20 o
   4   5   7       6327.52       8594.66       316.28 o
   5   5   7      39024.34      34098.09       975.74 o
   6   5   7      58763.41      63376.20      1376.73 o
   7   5   7      11989.60      11063.75       587.97 o
   8   5   7       5278.18       4352.85       395.90 o
   9   5   7       2177.28       2252.34       300.12 o
  10   5   7       2512.10       1988.80       292.92 o
  11   5   7       3959.20       3570.39       399.35 o
  12   5   7       1355.79       1529.05       287.30 o
  13   5   7        398.84        430.98       193.38 o
  14   5   7        101.79        119.78       113.75 o
  15   5   7        993.51       1135.40       285.96 o
  16   5   7       1087.75       2041.61       363.19 o
 -16   6   7        876.38        875.47       253.75 o
 -15   6   7        349.66        764.62       234.77 o
 -14   6   7        324.55        300.70       178.09 o
 -13   6   7        436.61        618.35       211.07 o
 -12   6   7        607.90        602.77       201.86 o
 -11   6   7       2782.58       2414.68       341.27 o
 -10   6   7       5112.72       5751.40       482.65 o
  -9   6   7        464.53        743.88       209.49 o
  -8   6   7      10713.58      12151.63       661.69 o
  -7   6   7       1822.91       1445.61       239.66 o
  -6   6   7        654.58        809.32       201.53 o
  -5   6   7       6594.12       7823.10       503.39 o
  -4   6   7       3351.20       2751.74       300.54 o
  -3   6   7       3396.72       2931.98       221.42 o
  -2   6   7      13162.20      10560.88       220.84 o
  -1   6   7      31468.10      33070.25       850.63 o
   0   6   7        837.09        702.07        70.07 o
   1   6   7      31307.44      32946.67       605.97 o
   2   6   7      13659.97      11008.02       339.33 o
   3   6   7       2983.12       2637.23       149.59 o
   4   6   7       4501.15       3827.59       242.72 o
   5   6   7       5751.86       7799.42       504.22 o
   6   6   7       1309.30        834.57       210.15 o
   7   6   7       2096.52       1493.63       242.96 o
   8   6   7       9611.69      11441.57       651.15 o
   9   6   7        737.31        889.29       225.64 o
  10   6   7       5513.94       6062.31       503.85 o
  11   6   7       2461.82       2358.40       331.10 o
  12   6   7        351.45        575.70       221.92 o
  13   6   7        638.83        888.66       234.43 o
  14   6   7        487.78        478.44       203.44 o
  15   6   7        250.64        360.17       182.50 o
  16   6   7        718.76        864.12       264.18 o
 -16   7   7        241.20        237.56       148.33 o
 -15   7   7        654.95        852.03       244.47 o
 -14   7   7        435.58        473.60       199.81 o
 -13   7   7       1810.72       2226.49       352.97 o
 -12   7   7        527.98        533.56       193.80 o
 -11   7   7       2885.27       2781.76       369.88 o
 -10   7   7       8039.02       7418.30       568.49 o
  -9   7   7        496.70        664.27       186.98 o
  -8   7   7        685.10        830.13       207.94 o
  -7   7   7       1608.80       1399.17       250.44 o
  -6   7   7       3139.29       3430.03       376.00 o
  -5   7   7       7201.47       7530.99       523.30 o
  -4   7   7       9636.67      10491.29       598.64 o
  -3   7   7       2160.41       1750.96       272.95 o
  -2   7   7      17018.08      14653.47       532.48 o
  -1   7   7       7454.75       7873.68       320.98 o
   0   7   7       8656.53       8414.95       227.11 o
   1   7   7       7933.22       8218.50       554.19 o
   2   7   7      16567.05      16466.33       545.69 o
   3   7   7       1186.38       1176.08       131.55 o
   4   7   7       9314.88       8269.66       689.77 o
   5   7   7       6503.46       7915.21       557.28 o
   6   7   7       3312.41       4534.79       673.48 o
   7   7   7       1530.48       1505.74       255.25 o
   8   7   7        876.41        935.30       217.63 o
   9   7   7        643.79        837.70       207.92 o
  10   7   7       7106.73       6633.57       541.71 o
  11   7   7       2859.92       2531.90       363.02 o
  12   7   7        585.85        692.42       198.24 o
  13   7   7       2044.20       2362.55       365.51 o
  14   7   7        415.69        535.90       214.68 o
  15   7   7        812.73       1183.48       290.74 o
  16   7   7        176.39        299.45       172.44 o
 -15   8   7        125.01        211.42       167.21 o
 -14   8   7         32.15         81.99       136.65 o
 -13   8   7       1499.12       1621.12       322.29 o
 -12   8   7       1421.59       1612.67       310.62 o
 -11   8   7       1169.10       1532.37       291.67 o
 -10   8   7        187.53        572.81       186.92 o
  -9   8   7        857.53        838.25       222.43 o
  -8   8   7       4814.68       4314.58       198.53 o
  -7   8   7       2261.85       1958.78       302.16 o
  -6   8   7       8538.82       9313.08       611.11 o
  -5   8   7       1424.67       1763.35       285.84 o
  -4   8   7       3479.55       3289.92       360.48 o
  -3   8   7       1785.97       1828.28       138.55 o
  -2   8   7       5730.30       5512.12       204.44 o
  -1   8   7      21748.39      21125.14       484.31 o
   0   8   7       9707.26      13197.12       563.31 o
   1   8   7      20635.25      18859.39       652.18 o
   2   8   7       4951.72       5473.37       464.11 o
   3   8   7       1838.07       1656.77       118.85 o
   4   8   7       2873.89       2859.88       242.51 o
   5   8   7        784.49       1623.89       304.93 o
   6   8   7       8177.55       7495.82       378.11 o
   7   8   7       2309.67       2064.45       218.77 o
   8   8   7       4551.74       3931.25       421.51 o
   9   8   7       1009.22        855.67       234.53 o
  10   8   7         99.28        468.26       175.65 o
  11   8   7       1341.62       1368.03       276.82 o
  12   8   7       1118.38       1327.07       286.41 o
  13   8   7       1356.58       1383.98       301.74 o
  14   8   7         19.99        -92.84       153.53 o
  15   8   7        141.79        296.23       194.94 o
 -15   9   7         23.32         48.23       128.21 o
 -14   9   7        130.32        377.42       207.40 o
 -13   9   7       1880.53       1778.49       334.05 o
 -12   9   7       2499.26       3144.97       428.46 o
 -11   9   7       5419.84       4784.82       513.08 o
 -10   9   7       2784.69       3651.17       443.15 o
  -9   9   7       4014.44       3467.72       435.23 o
  -8   9   7       4150.84       4892.38       487.83 o
  -7   9   7       2717.35       2071.03       320.39 o
  -6   9   7       1150.15       1208.79       246.27 o
  -5   9   7       3804.68       3202.99       376.16 o
  -4   9   7      14295.23      13377.67      1228.04 o
  -3   9   7       1578.67       1611.62       135.92 o
  -2   9   7      11340.29       8627.50       352.36 o
  -1   9   7       1893.38       1488.67       113.53 o
   0   9   7      24886.47      30110.51       507.02 o
   1   9   7       2143.07       1712.18       217.68 o
   2   9   7      10250.74       7083.62       568.56 o
   3   9   7       1600.61       2141.71       155.33 o
   4   9   7      14430.00      13872.05       769.78 o
   5   9   7       3716.86       2480.78       473.58 o
   6   9   7       1098.37       1068.84       161.71 o
   7   9   7       2509.32       2247.00       409.37 o
   8   9   7       3988.52       4359.90       469.60 o
   9   9   7       4010.73       3571.37       431.60 o
  10   9   7       2986.70       3012.34       411.80 o
  11   9   7       5506.63       4554.64       508.27 o
  12   9   7       2460.27       2860.99       425.62 o
  13   9   7       1529.95       1607.03       316.66 o
  14   9   7        123.25        542.22       212.22 o
  15   9   7         11.71        136.25       130.22 o
 -14  10   7         61.04        104.90       127.41 o
 -13  10   7        634.72        963.81       266.99 o
 -12  10   7       1607.14       2369.27       377.84 o
 -11  10   7       1134.54       1623.53       328.65 o
 -10  10   7        709.73        743.96       240.48 o
  -9  10   7        172.78        381.06       192.54 o
  -8  10   7       1502.24       1807.01       317.94 o
  -7  10   7       3708.22       3230.16       413.80 o
  -6  10   7       4195.98       4166.10       454.83 o
  -5  10   7        821.95       1007.86       186.84 o
  -4  10   7       2077.94       2175.42       211.08 o
  -3  10   7      19417.75      17991.76       666.51 o
  -2  10   7       4781.77       5054.51       281.72 o
  -1  10   7       4698.34       4758.75       206.61 o
   0  10   7        395.40        761.55       103.60 o
   1  10   7       5393.91       5943.26       325.94 o
   2  10   7       3444.25       2916.29       385.31 o
   3  10   7      20843.15      19684.46       501.62 o
   4  10   7       2147.48       2661.90       383.90 o
   5  10   7        812.38       1068.76       252.21 o
   6  10   7       3996.89       3534.86       292.62 o
   7  10   7       3787.54       3028.73       401.33 o
   8  10   7       2242.26       2377.66       365.67 o
   9  10   7        157.37        263.69       170.83 o
  10  10   7        650.30        594.74       197.84 o
  11  10   7       1138.70       1679.05       329.86 o
  12  10   7       1622.62       1836.13       336.80 o
  13  10   7        484.29        545.17       236.80 o
  14  10   7        108.81        260.86       183.68 o
 -13  11   7        300.32        266.12       171.65 o
 -12  11   7         96.96         49.44       121.79 o
 -11  11   7        403.23        541.93       223.53 o
 -10  11   7       2763.80       2842.03       424.93 o
  -9  11   7       8855.16      10299.68       763.51 o
  -8  11   7       5305.05       4342.16       514.36 o
  -7  11   7        268.31        567.63       226.73 o
  -6  11   7       1103.56       1433.46       296.51 o
  -5  11   7       2212.73       1969.14       266.63 o
  -4  11   7       3751.63       3168.65       329.78 o
  -3  11   7       1214.43       1703.23       226.12 o
  -2  11   7        522.49        634.14       106.67 o
  -1  11   7        320.21        312.09        72.99 o
   0  11   7       1360.32       2127.32       151.14 o
   1  11   7        215.69        488.06       118.82 o
   2  11   7        845.16        625.95       143.57 o
   3  11   7        983.99       1391.77       162.45 o
   4  11   7       3586.30       3662.31       449.72 o
   5  11   7       1577.77       1028.83       252.78 o
   6  11   7       1564.10       1664.29       310.32 o
   7  11   7        416.55        755.06       248.47 o
   8  11   7       4720.45       3798.46       471.73 o
   9  11   7       8144.25       9210.21       725.84 o
  10  11   7       2966.35       3002.41       429.03 o
  11  11   7        365.22        349.35       179.70 o
  12  11   7        182.34        188.92       165.20 o
  13  11   7        258.28        418.06       209.83 o
 -13  12   7        337.08        723.59       267.33 o
 -12  12   7        823.97       1017.81       289.14 o
 -11  12   7        698.86        566.57       239.66 o
 -10  12   7       1540.39       1918.52       367.37 o
  -9  12   7       2937.64       3143.72       446.34 o
  -8  12   7       1545.98       1208.44       278.87 o
  -7  12   7       2372.18       1652.73       347.14 o
  -6  12   7        332.67        318.00       174.08 o
  -5  12   7         24.28         27.33       116.55 o
  -4  12   7      11321.80      11008.93       817.91 o
  -3  12   7        231.88        233.51       109.77 o
  -2  12   7        515.06        714.90        87.69 o
  -1  12   7       5668.36       5633.52       239.23 o
   0  12   7        155.85        216.11        65.57 o
   1  12   7       6013.96       6431.68       362.35 o
   2  12   7        552.84        343.28       122.45 o
   3  12   7        348.21        693.46       133.75 o
   4  12   7      10781.03      10552.53       789.91 o
   5  12   7        113.07        169.22       157.16 o
   6  12   7        360.78        428.16       188.15 o
   7  12   7       2558.56       1888.61       359.28 o
   8  12   7       1649.24       1325.66       294.99 o
   9  12   7       3247.39       3414.04       473.04 o
  10  12   7       1686.10       1915.11       374.25 o
  11  12   7        654.55        561.33       231.21 o
  12  12   7        863.84        883.92       256.57 o
  13  12   7        294.10        645.99       245.61 o
 -12  13   7        753.37        985.57       305.60 o
 -11  13   7       1380.81       1898.43       377.75 o
 -10  13   7         10.68        208.99       186.49 o
  -9  13   7       2076.78       2383.80       402.13 o
  -8  13   7        859.35        645.89       258.20 o
  -7  13   7        473.32        808.14       247.27 o
  -6  13   7        740.92        875.89       275.88 o
  -5  13   7        426.43        229.97       149.16 o
  -4  13   7       1365.57       1495.25       342.43 o
  -3  13   7        728.27        833.28       236.07 o
  -2  13   7        269.89        377.96        94.76 o
  -1  13   7       1366.60       1525.44       129.72 o
   0  13   7       7087.80       9808.64       320.99 o
   1  13   7       1386.29       1518.33       184.85 o
   2  13   7        368.09        223.88        92.25 o
   3  13   7        881.81        759.44       346.11 o
   4  13   7       1317.49       1615.10       349.25 o
   5  13   7        483.29         21.71       149.17 o
   6  13   7        452.18        515.84       216.31 o
   7  13   7        475.54        676.66       240.83 o
   8  13   7       1081.80        801.27       258.24 o
   9  13   7       2125.55       2283.66       393.29 o
  10  13   7         18.71       -103.29       152.73 o
  11  13   7       1366.41       1686.81       370.11 o
  12  13   7        753.55        922.84       277.05 o
 -11  14   7        363.13        479.99       244.02 o
 -10  14   7         85.98        168.81       173.23 o
  -9  14   7         74.37         20.90       170.82 o
  -8  14   7        279.28        338.07       229.13 o
  -7  14   7       3878.19       4344.56       547.40 o
  -6  14   7       1225.66       1637.73       351.20 o
  -5  14   7        355.64        135.08       138.70 o
  -4  14   7       1069.72        709.98       274.34 o
  -3  14   7       1608.40       1114.21       158.50 o
  -2  14   7       1524.36       1450.41       190.34 o
  -1  14   7       1495.07       1241.70       169.08 o
   0  14   7       1753.00       2413.80       209.96 o
   1  14   7       1482.29       1367.81       183.16 o
   2  14   7       1517.92       1205.63       175.14 o
   3  14   7       1311.26        826.44       145.09 o
   4  14   7       1298.39       1188.89       326.29 o
   5  14   7        511.65        135.50       160.43 o
   6  14   7       1326.59       1250.82       317.03 o
   7  14   7       3869.64       4273.59       537.32 o
   8  14   7        231.91        435.74       244.40 o
   9  14   7        112.39        136.26       143.89 o
  10  14   7        108.91        346.87       202.17 o
  11  14   7        349.56        295.47       223.91 o
 -10  15   7       1027.75       1475.61       367.60 o
  -9  15   7        494.71        319.22       194.99 o
  -8  15   7         13.82        -84.40       172.42 o
  -7  15   7        393.92        481.22       241.61 o
  -6  15   7         82.68          0.40       142.68 o
  -5  15   7         23.61       -118.16       178.05 o
  -4  15   7        717.55        710.84       313.66 o
  -3  15   7       1132.16       1167.21       443.70 o
  -2  15   7       2750.62       3399.17       291.21 o
  -1  15   7        634.31        614.20       118.06 o
   0  15   7        972.24       1015.21       143.74 o
   1  15   7        634.22        365.14       114.39 o
   2  15   7       2427.94       2259.29       289.87 o
   3  15   7       1057.86       1210.57       179.07 o
   4  15   7        798.37        709.27       194.47 o
   5  15   7          7.20       -115.35       189.30 o
   6  15   7        120.37        142.69       186.90 o
   7  15   7        394.63        432.98       214.28 o
   8  15   7          3.12        301.43       213.41 o
   9  15   7        544.47        770.74       286.26 o
  10  15   7       1058.94       1439.44       357.95 o
  -8  16   7        352.81        661.29       268.94 o
  -7  16   7        105.80        400.33       233.52 o
  -6  16   7       1148.36       1648.75       382.52 o
  -5  16   7       2644.43       3175.09       504.95 o
  -4  16   7        530.47        301.13       329.89 o
  -3  16   7       2949.56       3824.51       834.78 o
  -2  16   7        882.45        869.07       200.70 o
  -1  16   7        282.48        680.19       134.63 o
   0  16   7        330.48        420.63       116.05 o
   1  16   7        240.28        306.52       113.82 o
   2  16   7        769.70        693.59       146.19 o
   3  16   7       2756.14       2938.98       345.44 o
   4  16   7        610.80        431.14       154.69 o
   5  16   7       2651.36       2801.42       471.94 o
   6  16   7       1317.01       1636.88       375.73 o
   7  16   7         97.70        457.40       235.93 o
   8  16   7        438.05        748.17       286.24 o
  -6  17   7        562.61        388.39       222.74 o
  -5  17   7        228.79        346.24       164.40 o
  -4  17   7         44.47        181.66       295.41 o
  -3  17   7        262.29        169.13       131.25 o
  -2  17   7         62.27         29.98       116.23 o
  -1  17   7       1207.81       1193.42       246.39 o
   0  17   7       1168.88        986.69       237.97 o
   1  17   7       1178.51        813.09       212.79 o
   2  17   7         62.13        103.77       120.29 o
   3  17   7        238.54        187.02       264.50 o
   4  17   7         28.57         29.48       163.98 o
   5  17   7        227.86        267.66       136.80 o
   6  17   7        499.37        445.06       246.05 o
  -3  18   7        272.84        101.51       111.72 o
  -2  18   7       1308.92       1305.22       265.52 o
  -1  18   7        219.55        257.00       306.30 o
   0  18   7       2483.23       2824.60       383.14 o
   1  18   7        168.30        238.29       289.40 o
   2  18   7       1407.83       1370.32       269.19 o
   3  18   7        328.56        257.12       145.31 o
   0   0   8     524765.25     929980.62      6706.17 o
   1   0   8      10952.72       2574.26        99.36 o
   2   0   8       1578.73       1707.01        54.77 o
   3   0   8      17237.18      12516.08       186.98 o
   4   0   8      88284.54      94723.09       801.85 o
   5   0   8      65685.81      46677.52       572.64 o
   6   0   8      32821.60      35530.91       657.01 o
   7   0   8      16885.63      12176.61       378.21 o
   8   0   8        254.33        460.47        94.81 o
   9   0   8      16853.02      17930.15       515.63 o
  10   0   8       1815.86       2447.99       229.48 o
  11   0   8       5956.04       4205.44       284.31 o
  12   0   8       1357.96       1326.69       170.89 o
  13   0   8        266.52        416.12       132.93 o
  14   0   8        167.00        277.15       102.89 o
  15   0   8       1701.67       1870.08       229.35 o
  16   0   8       1327.63       1994.94       255.65 o
  17   0   8          7.39         99.83       100.07 o
 -17   1   8       1138.65       1756.37       242.75 o
 -16   1   8        556.66        437.40       128.72 o
 -15   1   8       5170.93       5209.66       360.46 o
 -14   1   8       1886.52       2088.53       224.25 o
 -13   1   8       1054.46       1198.10       171.04 o
 -12   1   8       4887.26       4104.75       291.51 o
 -11   1   8       1311.17       2411.84       215.96 o
 -10   1   8       2987.95       3250.98       237.92 o
  -9   1   8      11340.88      10388.51       396.84 o
  -8   1   8      19623.95      20112.93       515.61 o
  -7   1   8       2664.33       2641.62       192.58 o
  -6   1   8       3921.65       6045.14       178.77 o
  -5   1   8      41361.15      42099.43       685.32 o
  -4   1   8       2065.54       2414.48        99.27 o
  -3   1   8      46919.88      43380.38       354.80 o
  -2   1   8       5604.55       7390.02       111.73 o
  -1   1   8      11009.00      10602.90       218.67 o
   0   1   8        103.95         88.37        40.16 o
   1   1   8      11568.58      10731.72       242.18 o
   2   1   8       6137.96       7603.60       293.34 o
   3   1   8      45489.41      41164.80       347.79 o
   4   1   8       2395.98       2635.34       134.38 o
   5   1   8      47776.94      48370.04       472.79 o
   6   1   8       6016.73       7732.80       201.99 o
   7   1   8       3562.54       3723.97       223.76 o
   8   1   8      19378.76      19474.94       789.95 o
   9   1   8      10170.69       9684.40       384.69 o
  10   1   8       3058.55       3073.74       233.33 o
  11   1   8       1643.61       2985.74       237.79 o
  12   1   8       5106.95       4418.21       373.92 o
  13   1   8       1303.22       1547.19       193.30 o
  14   1   8       1565.37       1888.28       216.60 o
  15   1   8       4780.84       4750.50       350.13 o
  16   1   8        511.67        271.43       117.15 o
  17   1   8       1119.55       1678.54       236.17 o
 -17   2   8        463.00        232.53       121.23 o
 -16   2   8       1188.80       1116.03       190.79 o
 -15   2   8        224.78        211.59       112.35 o
 -14   2   8        125.93        122.71       104.13 o
 -13   2   8        611.92        961.02       197.04 o
 -12   2   8        389.96        316.03        99.63 o
 -11   2   8       2264.84       1949.15       196.78 o
 -10   2   8         97.73        192.67        90.24 o
  -9   2   8      17627.08      17278.63       704.44 o
  -8   2   8       2810.79       2748.73       201.32 o
  -7   2   8      11429.61      13330.87       401.73 o
  -6   2   8      19819.37      23786.60       452.78 o
  -5   2   8      68187.79      72081.14       751.09 o
  -4   2   8     106606.45     132917.91      1791.23 o
  -3   2   8      84640.75      79052.50       854.98 o
  -2   2   8      31804.63      25285.04       528.80 o
  -1   2   8      36327.83      18957.25       286.51 o
   0   2   8      11965.10       9622.91       179.30 o
   1   2   8      29586.98      13683.62       188.68 o
   2   2   8      33104.20      27269.51       386.43 o
   3   2   8      84738.52      82523.38      1876.80 o
   4   2   8     101464.71     132650.03       771.74 o
   5   2   8      73566.46      78004.24       965.53 o
   6   2   8      22020.76      26160.92       381.90 o
   7   2   8       8691.58      10906.44       366.67 o
   8   2   8       2124.74       2418.46       191.76 o
   9   2   8      17908.08      17641.18       519.27 o
  10   2   8         85.64        641.96       121.76 o
  11   2   8       1360.73       1398.40       170.74 o
  12   2   8        368.24        175.79        86.24 o
  13   2   8       1111.69       1542.63       263.90 o
  14   2   8        119.65         97.68       102.70 o
  15   2   8        101.78        232.85       116.66 o
  16   2   8       1332.28       1381.50       206.01 o
  17   2   8        607.45        443.59       151.23 o
 -17   3   8        920.31        904.97       179.71 o
 -16   3   8       1533.52       1160.25       188.95 o
 -15   3   8        661.90        818.32       161.64 o
 -14   3   8        523.13       1047.30       172.83 o
 -13   3   8        520.06        687.28       137.45 o
 -12   3   8        451.70        561.79       120.07 o
 -11   3   8       4483.48       4781.42       306.61 o
 -10   3   8       6145.16       5625.44       311.07 o
  -9   3   8       1560.76       1260.51       155.27 o
  -8   3   8      14191.34      16636.63       482.18 o
  -7   3   8       9976.43       9303.39       339.88 o
  -6   3   8      15575.24      19102.89      1158.17 o
  -5   3   8       1380.50       1052.61        95.64 o
  -4   3   8       6839.57       8577.95       319.02 o
  -3   3   8      41917.68      46241.29       644.82 o
  -2   3   8      28179.53      23898.94       596.34 o
  -1   3   8      59514.51      56446.72       574.87 o
   0   3   8      86983.48      93328.36      1114.92 o
   1   3   8      61059.68      62358.55      1135.00 o
   2   3   8      26287.83      21101.96       315.28 o
   3   3   8      44101.72      46411.92      1313.13 o
   4   3   8       6851.11       8741.40       232.04 o
   5   3   8        388.24       1293.86       106.16 o
   6   3   8      16404.08      19721.11       946.34 o
   7   3   8      10251.44      10021.49       756.76 o
   8   3   8      14687.36      16260.29       654.46 o
   9   3   8       1806.17       1376.92       181.63 o
  10   3   8       4335.89       4118.38       272.19 o
  11   3   8       4575.86       4921.34       311.99 o
  12   3   8        507.06        707.49       140.82 o
  13   3   8        373.76        495.14       121.00 o
  14   3   8        623.21        947.49       159.32 o
  15   3   8        607.42        801.26       152.90 o
  16   3   8       1232.60       1108.75       188.78 o
  17   3   8       1217.57       1113.66       196.42 o
 -16   4   8         56.01        223.49       115.47 o
 -15   4   8        248.83        338.96       168.83 o
 -14   4   8       2886.40       3286.85       285.87 o
 -13   4   8        993.31       1438.85       197.57 o
 -12   4   8        176.66        150.70        95.79 o
 -11   4   8       2427.92       3243.63       262.10 o
 -10   4   8       3256.74       3151.00       237.23 o
  -9   4   8      12744.85      12365.04       452.76 o
  -8   4   8       8488.76       9418.42       548.96 o
  -7   4   8       5367.03       5209.49       399.11 o
  -6   4   8      15878.37      14573.29       613.95 o
  -5   4   8       3981.72       3623.60       169.78 o
  -4   4   8      14749.14      13323.57       935.52 o
  -3   4   8      13512.07      19492.60       486.82 o
  -2   4   8      29151.08      26691.55       451.54 o
  -1   4   8      23695.83      21179.11       358.65 o
   0   4   8     198151.91     246399.75      3097.83 o
   1   4   8      24495.75      22097.86       419.28 o
   2   4   8      28997.01      26185.13       648.77 o
   3   4   8      12323.61      17813.04       574.27 o
   4   4   8      13899.02      12101.23      1387.10 o
   5   4   8       4734.86       4552.46       189.53 o
   6   4   8      12318.98      12840.00       576.09 o
   7   4   8       6336.16       5621.03       416.24 o
   8   4   8       7888.54       9508.24       547.35 o
   9   4   8      13304.78      13185.79       701.26 o
  10   4   8       2749.38       2446.04       214.28 o
  11   4   8       2908.68       3683.54       283.97 o
  12   4   8         59.70        107.32        86.48 o
  13   4   8       1444.09       1683.99       215.85 o
  14   4   8       2780.88       2983.04       273.42 o
  15   4   8        163.30        208.24       107.75 o
  16   4   8         36.99         34.49        92.61 o
 -16   5   8       2294.90       2252.64       372.76 o
 -15   5   8        163.08        224.29       175.25 o
 -14   5   8        236.94        407.20       185.71 o
 -13   5   8        328.98        244.42       142.31 o
 -12   5   8       2616.57       2114.39       326.69 o
 -11   5   8        246.78        390.34       174.06 o
 -10   5   8       2348.81       2146.36       306.16 o
  -9   5   8       7953.70       8156.03       543.14 o
  -8   5   8      10837.49      12471.78       642.17 o
  -7   5   8       2474.14       2871.74       310.84 o
  -6   5   8      13006.94      13166.69       613.62 o
  -5   5   8      57437.07      63684.50      1334.34 o
  -4   5   8       6315.56       6593.19       446.90 o
  -3   5   8      59112.61      63933.04       930.13 o
  -2   5   8        697.03       1608.06       112.94 o
  -1   5   8      21022.07      19082.19       375.03 o
   0   5   8      34923.04      35356.51       672.67 o
   1   5   8      19803.44      18213.15       503.23 o
   2   5   8       1231.67       1697.04       121.54 o
   3   5   8      53186.35      55973.21       880.37 o
   4   5   8       4687.41       4889.08       223.96 o
   5   5   8      57180.75      64104.42      1336.07 o
   6   5   8      13604.31      14742.78       652.60 o
   7   5   8       3319.55       2925.65       328.12 o
   8   5   8      11485.24      13484.82       669.92 o
   9   5   8       8487.33       8736.52       559.26 o
  10   5   8       2500.78       2240.56       309.03 o
  11   5   8        291.93        530.26       180.10 o
  12   5   8       2938.17       2154.87       328.39 o
  13   5   8        518.36        346.19       171.28 o
  14   5   8        211.53        399.96       186.11 o
  15   5   8        224.30        522.16       225.91 o
  16   5   8       2481.62       2551.26       395.35 o
 -16   6   8       1426.47       1832.06       349.19 o
 -15   6   8        338.56        309.14       176.88 o
 -14   6   8         41.67        -28.94       114.55 o
 -13   6   8       2388.10       1804.77       322.14 o
 -12   6   8       4510.06       4616.96       473.23 o
 -11   6   8       1464.96       1553.00       278.08 o
 -10   6   8        501.66        270.61       142.34 o
  -9   6   8      11896.53      11068.98       654.97 o
  -8   6   8      16791.17      14080.61       714.69 o
  -7   6   8       2925.48       2717.91       312.97 o
  -6   6   8       6617.51       7125.72       482.75 o
  -5   6   8      45397.66      50003.93      1249.19 o
  -4   6   8       7619.06       9291.02       531.28 o
  -3   6   8      12955.19      13085.16       449.56 o
  -2   6   8      10111.66       9311.93       241.24 o
  -1   6   8      17892.93      22695.11       500.73 o
   0   6   8        724.75       1043.40       192.49 o
   1   6   8      15535.57      19894.42       469.81 o
   2   6   8       7834.62       7702.36       253.17 o
   3   6   8       9818.14      10275.43       290.28 o
   4   6   8       5953.50       8477.07      1233.49 o
   5   6   8      45509.52      48032.80       870.19 o
   6   6   8       6907.79       8382.09       514.96 o
   7   6   8       2311.69       1933.27       267.60 o
   8   6   8      17319.25      14419.08       721.65 o
   9   6   8       9621.97       8740.20       591.77 o
  10   6   8        408.63        302.35       151.58 o
  11   6   8       1361.70       1645.81       288.92 o
  12   6   8       4516.45       4184.09       445.80 o
  13   6   8       2651.35       2339.61       366.11 o
  14   6   8          4.41        129.01       148.71 o
  15   6   8        545.47        658.58       225.56 o
  16   6   8       1265.20       1397.83       319.79 o
 -15   7   8        621.56        764.36       250.50 o
 -14   7   8        462.09        396.01       197.00 o
 -13   7   8       1390.65       1755.81       320.67 o
 -12   7   8       1104.17        817.01       222.86 o
 -11   7   8       2928.24       3012.72       392.05 o
 -10   7   8       2147.73       2223.74       344.72 o
  -9   7   8       1903.06       3031.22       353.13 o
  -8   7   8       2877.96       2051.90       303.15 o
  -7   7   8       1087.48       1158.10       224.54 o
  -6   7   8       3784.85       3738.19       378.70 o
  -5   7   8      24755.21      21535.47       864.29 o
  -4   7   8      13287.88      14344.20       696.38 o
  -3   7   8       8176.71       7251.41       508.29 o
  -2   7   8       6935.76       8890.12       235.27 o
  -1   7   8      47243.23      45243.35       769.67 o
   0   7   8      13742.81       8361.22       213.86 o
   1   7   8      49203.71      46202.14      1291.03 o
   2   7   8       8842.07      10939.32       553.84 o
   3   7   8       6361.50       4702.62       632.71 o
   4   7   8      14735.14      15705.10       521.40 o
   5   7   8      22408.15      20164.26       676.03 o
   6   7   8       3940.80       4071.67       272.40 o
   7   7   8       1129.90       1197.19       224.95 o
   8   7   8       3125.73       2248.00       307.26 o
   9   7   8       2041.47       3034.46       355.60 o
  10   7   8       2311.01       1874.47       333.49 o
  11   7   8       2716.20       3081.05       384.33 o
  12   7   8       1270.27       1320.03       278.01 o
  13   7   8       1269.09       1525.53       306.96 o
  14   7   8        348.13        231.56       172.46 o
  15   7   8        614.01        830.69       258.13 o
 -15   8   8       1842.16       2229.79       390.34 o
 -14   8   8        866.17        976.84       251.75 o
 -13   8   8       1641.84       1043.04       268.81 o
 -12   8   8        556.72        518.29       202.25 o
 -11   8   8       2303.29       1826.18       335.44 o
 -10   8   8       2933.05       2690.93       375.15 o
  -9   8   8       5001.52       5140.76       492.23 o
  -8   8   8       1308.24       1101.42       206.04 o
  -7   8   8        749.74       1206.67       242.14 o
  -6   8   8       3173.59       3786.54       398.10 o
  -5   8   8       7439.94       7224.71       527.49 o
  -4   8   8       3705.63       2962.84       352.49 o
  -3   8   8      17702.32      18870.67       622.94 o
  -2   8   8      20187.93      18387.22       372.29 o
  -1   8   8       2350.64       2910.30       189.30 o
   0   8   8      22550.28      19034.28       359.22 o
   1   8   8       1896.89       2048.62       218.08 o
   2   8   8      19186.04      17939.38       847.95 o
   3   8   8      17863.00      18956.51       854.89 o
   4   8   8       4059.23       4180.57       380.72 o
   5   8   8       6388.90       6453.40       351.44 o
   6   8   8       3351.59       3497.48       262.42 o
   7   8   8       1090.55       1590.17       280.85 o
   8   8   8       1227.06       1164.54       242.65 o
   9   8   8       6025.62       5815.83       520.19 o
  10   8   8       2869.35       2608.98       376.34 o
  11   8   8       2595.70       2194.77       361.70 o
  12   8   8        753.10        651.88       221.98 o
  13   8   8       1475.62        945.94       263.54 o
  14   8   8       1108.31       1291.15       282.77 o
  15   8   8       1822.69       2100.58       379.47 o
 -15   9   8        348.78        296.68       182.91 o
 -14   9   8       1365.37       1721.00       342.75 o
 -13   9   8          4.68         94.85       149.11 o
 -12   9   8        562.70        647.35       231.60 o
 -11   9   8       3793.91       3975.40       464.82 o
 -10   9   8        290.39        370.65       186.93 o
  -9   9   8       1843.21       1749.58       327.69 o
  -8   9   8       2994.47       3597.59       424.00 o
  -7   9   8       1045.05        566.07       181.85 o
  -6   9   8       3614.80       3492.91       399.40 o
  -5   9   8      13816.09      17075.62       849.03 o
  -4   9   8       1013.85       1178.01       141.95 o
  -3   9   8        919.66       1108.95       112.73 o
  -2   9   8       2315.00       2454.21       199.85 o
  -1   9   8       4285.07       3466.00       176.61 o
   0   9   8        541.65        480.12       137.02 o
   1   9   8       3718.53       3174.43       236.15 o
   2   9   8       1211.87       1224.01       251.97 o
   3   9   8       1571.81       1799.61       137.71 o
   4   9   8       1148.65       1471.71       266.82 o
   5   9   8      15218.09      17178.82       624.15 o
   6   9   8       4457.72       4118.04       301.83 o
   7   9   8        526.81        324.51       142.75 o
   8   9   8       2737.79       3551.99       418.26 o
   9   9   8       1687.81       1897.86       329.66 o
  10   9   8        285.92        420.50       191.76 o
  11   9   8       3720.85       4042.49       454.72 o
  12   9   8        617.75        577.01       213.51 o
  13   9   8         37.04         99.27       135.85 o
  14   9   8       1135.30       1599.25       346.72 o
  15   9   8        444.19        404.84       199.00 o
 -14  10   8        238.70         41.80       123.40 o
 -13  10   8        458.94        230.77       163.63 o
 -12  10   8       1181.39       1059.96       280.38 o
 -11  10   8        973.73       1098.44       251.38 o
 -10  10   8        100.65        415.20       202.98 o
  -9  10   8       4946.57       5320.41       536.00 o
  -8  10   8       2651.50       2420.41       367.01 o
  -7  10   8       1975.86       1300.57       262.93 o
  -6  10   8        536.26        476.11       181.76 o
  -5  10   8       9897.30       9172.38       948.96 o
  -4  10   8        280.95        384.60       102.46 o
  -3  10   8        424.53        522.93        98.08 o
  -2  10   8       8562.01       6902.49       329.20 o
  -1  10   8       3142.68       3302.04       172.33 o
   0  10   8      11513.49      12072.48       416.04 o
   1  10   8       3300.57       3491.99       255.68 o
   2  10   8       9344.05       7873.62       614.03 o
   3  10   8        518.95        911.69       125.97 o
   4  10   8        201.83        192.15       147.53 o
   5  10   8       9789.90      10264.71       690.89 o
   6  10   8        307.89        492.88       190.56 o
   7  10   8       2494.34       1757.23       296.09 o
   8  10   8       2494.42       2117.96       337.15 o
   9  10   8       4325.37       4299.82       475.20 o
  10  10   8         71.74        204.58       149.92 o
  11  10   8       1430.94       1421.92       302.57 o
  12  10   8        969.43        933.10       270.68 o
  13  10   8        557.77        886.55       260.94 o
  14  10   8        230.74         90.84       154.76 o
 -13  11   8        111.50        299.44       209.01 o
 -12  11   8        323.06        246.43       168.04 o
 -11  11   8        263.01        451.83       192.55 o
 -10  11   8       2097.01       2726.59       403.37 o
  -9  11   8        339.99        909.76       274.18 o
  -8  11   8        967.31       1032.54       248.99 o
  -7  11   8       5143.85       5726.31       559.59 o
  -6  11   8       1974.12       1834.42       325.74 o
  -5  11   8        978.81       1148.31       160.05 o
  -4  11   8        485.22        738.02       131.28 o
  -3  11   8      16776.14      16607.27       730.76 o
  -2  11   8       2448.87       2657.81       189.55 o
  -1  11   8       6944.54       6424.48       242.65 o
   0  11   8       2964.43       2810.15       159.66 o
   1  11   8       6912.56       7123.33       366.47 o
   2  11   8       2880.75       2897.63       313.86 o
   3  11   8      17233.18      16622.74       504.94 o
   4  11   8        451.17        513.46       194.21 o
   5  11   8        997.10       1232.61       258.27 o
   6  11   8       2573.87       2693.94       386.34 o
   7  11   8       5462.55       5901.98       562.98 o
   8  11   8       1079.21       1409.57       287.63 o
   9  11   8        402.84       1088.32       278.21 o
  10  11   8       1749.13       2281.94       381.53 o
  11  11   8        326.21        355.37       191.35 o
  12  11   8        299.47        238.78       160.80 o
  13  11   8        105.30        212.62       197.35 o
 -13  12   8        707.91        771.62       275.44 o
 -12  12   8        446.51        661.74       246.85 o
 -11  12   8         65.16        100.08       167.20 o
 -10  12   8       1653.33       1513.05       329.17 o
  -9  12   8        214.91        486.79       213.05 o
  -8  12   8        858.86       1151.46       281.53 o
  -7  12   8       1418.00       1936.28       348.87 o
  -6  12   8         43.06         -8.44       131.03 o
  -5  12   8       4900.13       4519.94       514.69 o
  -4  12   8       1713.20       1859.34       357.05 o
  -3  12   8       2586.79       2829.71       281.98 o
  -2  12   8       1911.93       2528.24       202.81 o
  -1  12   8       1096.85        956.88       106.07 o
   0  12   8        917.44        921.13       102.93 o
   1  12   8       1278.40       1159.61       165.20 o
   2  12   8       1946.39       2451.97       227.18 o
   3  12   8       2753.30       3087.47       252.25 o
   4  12   8       1569.31       1720.63       331.65 o
   5  12   8       4855.36       4719.17       510.63 o
   6  12   8        152.09        139.48       135.86 o
   7  12   8       1647.25       2023.18       365.84 o
   8  12   8        809.25        808.76       238.89 o
   9  12   8        117.76        197.76       170.83 o
  10  12   8       1699.73       1520.75       330.79 o
  11  12   8         43.18        295.41       199.35 o
  12  12   8        274.78        391.13       207.02 o
  13  12   8        566.71        735.36       262.54 o
 -12  13   8        166.06        486.36       211.02 o
 -11  13   8        211.96        371.82       225.90 o
 -10  13   8        620.08        633.28       236.43 o
  -9  13   8         31.93         83.60       147.10 o
  -8  13   8        377.35        270.16       162.01 o
  -7  13   8       1134.83        977.11       284.81 o
  -6  13   8        953.81        880.46       262.65 o
  -5  13   8        448.48        320.04       172.08 o
  -4  13   8        968.97       1271.89       322.20 o
  -3  13   8        470.71        377.88       120.35 o
  -2  13   8       2899.43       3562.63       269.76 o
  -1  13   8         82.44         29.28        66.81 o
   0  13   8        344.67        348.48        85.92 o
   1  13   8        139.94        219.30        95.95 o
   2  13   8       3194.90       2735.08       308.37 o
   3  13   8        194.79        123.88       101.10 o
   4  13   8        961.03       1379.68       322.19 o
   5  13   8        330.81        172.87       169.25 o
   6  13   8       1089.38       1007.27       271.13 o
   7  13   8       1279.45        964.76       281.22 o
   8  13   8        352.16        285.83       176.89 o
   9  13   8         21.34       -165.99       165.99 o
  10  13   8        727.44        681.59       248.51 o
  11  13   8        202.13        399.55       233.14 o
  12  13   8        175.62        561.13       239.16 o
 -11  14   8        156.29        265.69       182.48 o
 -10  14   8         25.19         20.10       141.47 o
  -9  14   8        338.85        316.38       185.73 o
  -8  14   8        267.07        471.13       223.50 o
  -7  14   8        161.70        342.46       207.41 o
  -6  14   8          6.60        -88.02       150.31 o
  -5  14   8       1933.38       1724.83       363.08 o
  -4  14   8       2335.64       1718.60       380.52 o
  -3  14   8        539.42        402.19       124.15 o
  -2  14   8        779.67        710.51       152.70 o
  -1  14   8        250.65        199.25        79.28 o
   0  14   8        803.30        829.59       133.26 o
   1  14   8        210.96        256.96       101.98 o
   2  14   8        947.63        755.32       150.59 o
   3  14   8        511.61        336.70       141.53 o
   4  14   8       2081.53       1918.33       387.69 o
   5  14   8       1948.10       1806.16       363.49 o
   6  14   8         47.85        117.76       161.97 o
   7  14   8        123.34        348.89       204.19 o
   8  14   8        329.35        458.69       230.75 o
   9  14   8        367.18        552.36       225.93 o
  10  14   8         22.91       -120.17       185.68 o
  11  14   8        131.36        269.30       208.61 o
  -9  15   8        331.17        350.14       231.55 o
  -8  15   8        330.11        425.31       235.57 o
  -7  15   8       1065.99        995.48       303.27 o
  -6  15   8        517.26        851.56       265.76 o
  -5  15   8        892.88       1069.39       289.97 o
  -4  15   8       1034.89       1629.18       699.67 o
  -3  15   8       1081.46        891.63       414.71 o
  -2  15   8       3329.85       4130.79       270.35 o
  -1  15   8       1516.90       1238.96       159.54 o
   0  15   8        263.56        301.14       131.71 o
   1  15   8       1231.90       1161.81       179.46 o
   2  15   8       3576.40       4059.43       315.00 o
   3  15   8       1033.10        870.51       197.79 o
   4  15   8        934.21       1389.50       198.03 o
   5  15   8        545.67        595.07       237.62 o
   6  15   8        397.00        736.91       252.47 o
   7  15   8       1042.54        745.29       257.01 o
   8  15   8        314.22        687.81       281.40 o
   9  15   8        339.08        712.34       272.96 o
  -8  16   8         92.23        312.70       225.48 o
  -7  16   8        615.07        470.03       232.40 o
  -6  16   8        310.30        236.77       190.54 o
  -5  16   8        601.71        758.32       261.75 o
  -4  16   8         61.59         58.21       203.77 o
  -3  16   8        462.98        647.59       395.21 o
  -2  16   8        149.97         84.28       107.19 o
  -1  16   8       1918.04       1996.93       202.40 o
   0  16   8         22.77        159.65       101.61 o
   1  16   8       1774.37       1701.52       197.62 o
   2  16   8        109.65        316.98       115.00 o
   3  16   8        482.22        683.25       156.78 o
   4  16   8         41.65          3.17       135.84 o
   5  16   8        599.43        635.69       261.75 o
   6  16   8        287.70        422.49       237.57 o
   7  16   8        618.36        648.55       273.41 o
   8  16   8        141.10        677.68       278.95 o
  -6  17   8         45.72        -79.58       166.39 o
  -5  17   8         60.28         15.41       176.24 o
  -4  17   8        400.22        592.61       223.52 o
  -3  17   8        110.74        405.47       311.10 o
  -2  17   8         45.55        212.18       131.90 o
  -1  17   8        263.18        187.88       121.00 o
   0  17   8        252.37        682.52       209.41 o
   1  17   8        315.22         61.87       104.25 o
   2  17   8        142.47        238.57       146.71 o
   3  17   8         98.87        161.47        99.49 o
   4  17   8        412.67        385.32       137.83 o
   5  17   8         87.54        -13.53       103.89 o
   6  17   8         35.41       -140.27       192.11 o
  -3  18   8         84.28        -63.65       138.76 o
  -2  18   8        945.81       1261.20       262.56 o
  -1  18   8         98.57         62.31       147.78 o
   0  18   8        206.92         -3.58       108.00 o
   1  18   8        120.51        188.39       143.38 o
   2  18   8        962.68       1130.02       274.88 o
   3  18   8         88.08         52.84       144.49 o
   1   0   9      19722.88      12876.63       509.51 o
   2   0   9       2129.36       3705.63        80.38 o
   3   0   9     117875.42     110410.45      1235.88 o
   4   0   9     205512.69     233747.20      1266.54 o
   5   0   9        261.88        234.70        42.93 o
   6   0   9      15587.19      17251.56       397.33 o
   7   0   9      18428.00      25131.57       542.56 o
   8   0   9        541.71        903.85       143.05 o
   9   0   9       2449.57       4475.20       261.73 o
  10   0   9      10191.50       8793.28       383.07 o
  11   0   9        452.52        471.67       108.07 o
  12   0   9       2773.49       2881.71       249.49 o
  13   0   9       1727.16       1234.50       171.70 o
  14   0   9          5.31        272.55       117.53 o
  15   0   9         92.56         37.51        92.68 o
  16   0   9        740.67        675.72       167.11 o
  17   0   9          5.90         12.43        94.06 o
 -17   1   9       1400.12       1478.72       219.17 o
 -16   1   9       1230.81       1323.44       201.08 o
 -15   1   9       1013.57        923.20       173.71 o
 -14   1   9        664.82        880.08       165.95 o
 -13   1   9       1966.53       1445.64       193.83 o
 -12   1   9        899.93        849.60       182.41 o
 -11   1   9       1695.42       1677.00       189.02 o
 -10   1   9       5758.71       5094.55       296.06 o
  -9   1   9        721.12        844.44       129.19 o
  -8   1   9       4331.42       6105.92       285.07 o
  -7   1   9       4015.15       4693.08       593.44 o
  -6   1   9      19793.77      18491.13       505.99 o
  -5   1   9       9097.36       9012.88       231.63 o
  -4   1   9      49962.91      48556.40       939.79 o
  -3   1   9      38453.27      43774.36       632.71 o
  -2   1   9      62839.05      50921.95       590.99 o
  -1   1   9      16027.73       5552.83       114.99 o
   0   1   9        899.01        445.65        51.09 o
   1   1   9      14704.22       4926.06       192.00 o
   2   1   9      61111.16      50277.81       366.88 o
   3   1   9      38354.27      43987.13       554.63 o
   4   1   9      48956.58      49008.02      1001.14 o
   5   1   9       8135.17       8099.98       282.23 o
   6   1   9      16634.40      15572.23       385.91 o
   7   1   9       3012.59       3492.75       296.49 o
   8   1   9       4570.43       5894.34       426.33 o
   9   1   9        937.35        801.39       125.27 o
  10   1   9       5944.97       5461.35       307.01 o
  11   1   9       1897.99       1749.46       190.96 o
  12   1   9       1016.21       1016.41       156.93 o
  13   1   9       2169.70       1769.92       210.12 o
  14   1   9        838.67        717.82       148.02 o
  15   1   9        853.36        792.39       171.65 o
  16   1   9       1095.52       1125.51       191.71 o
  17   1   9       1331.63       1496.92       224.89 o
 -17   2   9       1185.94       1281.87       211.95 o
 -16   2   9        545.09        480.48       136.41 o
 -15   2   9       2665.63       3113.20       287.60 o
 -14   2   9       1529.29       1492.53       205.15 o
 -13   2   9       3655.58       2833.70       257.15 o
 -12   2   9        549.78        336.94       100.95 o
 -11   2   9       5285.85       5817.16       332.99 o
 -10   2   9       1480.26       1374.45       167.82 o
  -9   2   9       1166.69       1064.39       150.80 o
  -8   2   9       4322.77       3709.08       229.01 o
  -7   2   9       7235.09       5025.19       248.92 o
  -6   2   9      29988.67      28467.16       395.10 o
  -5   2   9      37247.22      36470.41       416.50 o
  -4   2   9       3953.72       3184.60       117.38 o
  -3   2   9       1487.59       1666.17       130.25 o
  -2   2   9       3012.00       1456.65        77.40 o
  -1   2   9      10382.77      13452.04       496.05 o
   0   2   9       1192.92       1929.18        79.80 o
   1   2   9       9855.64      12897.19       277.66 o
   2   2   9       2974.14       1419.65        84.08 o
   3   2   9       2496.41       2057.83        99.69 o
   4   2   9       6677.50       4892.00       265.13 o
   5   2   9      34847.65      34465.71       595.02 o
   6   2   9      33304.54      32699.01       428.13 o
   7   2   9       5744.75       4025.33       348.06 o
   8   2   9       3866.67       3395.08       222.12 o
   9   2   9        818.47        762.98       137.96 o
  10   2   9       1523.63       1572.65       178.96 o
  11   2   9       5127.03       5263.66       321.59 o
  12   2   9       1018.53        483.48       116.61 o
  13   2   9       2916.87       2331.18       242.44 o
  14   2   9       1551.56       1655.64       220.06 o
  15   2   9       2622.05       2802.79       275.37 o
  16   2   9        662.21        506.36       141.50 o
  17   2   9       1084.51       1164.47       207.30 o
 -17   3   9        958.28        727.72       162.59 o
 -16   3   9        148.56         70.94        82.09 o
 -15   3   9        167.60        335.34       146.91 o
 -14   3   9        186.98        326.85       109.10 o
 -13   3   9         58.65         19.66       102.29 o
 -12   3   9        732.91        767.87       138.31 o
 -11   3   9       1302.53       1262.71       168.26 o
 -10   3   9       2989.94       3523.98       306.40 o
  -9   3   9       3064.94       2606.18       206.19 o
  -8   3   9       2669.40       2844.86       270.58 o
  -7   3   9       6207.45       6647.93       353.04 o
  -6   3   9       2527.54       2847.96       190.86 o
  -5   3   9      15320.30      13874.95       418.43 o
  -4   3   9      13612.38      13954.09       330.18 o
  -3   3   9       2059.86       3101.11       118.36 o
  -2   3   9      77869.52      81122.94       875.22 o
  -1   3   9      73188.09      68108.67       629.04 o
   0   3   9       7392.43       9914.16       213.40 o
   1   3   9      69752.15      65033.16       589.17 o
   2   3   9      74506.59      74345.22      1434.01 o
   3   3   9       2514.94       4016.37       160.30 o
   4   3   9      18521.36      18752.58       566.03 o
   5   3   9      15575.13      14392.61       319.07 o
   6   3   9       1948.60       2318.19       485.14 o
   7   3   9       7101.42       7943.66       675.29 o
   8   3   9       2858.06       2592.14       212.03 o
   9   3   9       2924.63       2135.84       194.91 o
  10   3   9       3063.36       3488.94       259.00 o
  11   3   9       1351.93       1639.49       189.44 o
  12   3   9        910.19        920.53       145.79 o
  13   3   9         64.53         50.89       231.11 o
  14   3   9        131.17        232.12       101.18 o
  15   3   9        206.07        259.27       109.53 o
  16   3   9        229.63        235.40       117.20 o
  17   3   9        893.43        857.31       178.49 o
 -16   4   9        261.65        263.40       122.71 o
 -15   4   9        339.46        479.19       131.59 o
 -14   4   9       3018.38       2710.90       273.85 o
 -13   4   9       2029.70       2642.52       275.77 o
 -12   4   9       8335.06       7175.99       556.48 o
 -11   4   9       7854.75       7997.94       878.60 o
 -10   4   9        812.64        988.49       144.82 o
  -9   4   9       7359.27       7055.91       490.25 o
  -8   4   9      21867.59      19967.22       783.07 o
  -7   4   9      22912.98      23675.03       815.77 o
  -6   4   9        496.30        641.50       163.29 o
  -5   4   9       5338.83       5706.60       211.67 o
  -4   4   9       8603.48       7324.45       569.16 o
  -3   4   9      24950.48      26841.73      1443.67 o
  -2   4   9      37134.52      35393.55      1112.66 o
  -1   4   9      27205.06      30012.39       431.63 o
   0   4   9       2646.42       2942.07       297.19 o
   1   4   9      26381.26      28950.93       430.61 o
   2   4   9      42439.74      42498.35      1168.18 o
   3   4   9      25569.13      27431.65       666.53 o
   4   4   9       8515.05       7489.00       229.56 o
   5   4   9       5368.57       7174.99       236.96 o
   6   4   9        507.11        276.71       139.16 o
   7   4   9      21802.46      22694.96       801.41 o
   8   4   9      21364.56      19149.61       767.37 o
   9   4   9       7733.47       7191.73       495.31 o
  10   4   9        878.41        990.84       174.78 o
  11   4   9       9007.45       8735.48       422.01 o
  12   4   9       8793.91       8118.78       464.56 o
  13   4   9       1889.58       2437.52       242.92 o
  14   4   9       2215.80       1681.49       233.91 o
  15   4   9        215.30        273.86       110.91 o
  16   4   9        275.28        472.65       139.03 o
 -16   5   9        743.01        894.70       261.37 o
 -15   5   9       1992.49       2321.15       375.52 o
 -14   5   9       1021.22        989.86       261.85 o
 -13   5   9         80.10         69.94       101.29 o
 -12   5   9       1787.42       1792.85       297.47 o
 -11   5   9       1063.09        630.81       187.47 o
 -10   5   9       3547.17       2958.72       344.03 o
  -9   5   9       5659.50       6232.67       469.83 o
  -8   5   9       4563.41       4378.33       387.05 o
  -7   5   9       2731.17       3467.39       323.43 o
  -6   5   9        613.17       1120.64       201.12 o
  -5   5   9      23176.70      24416.91       809.52 o
  -4   5   9      29297.82      30941.89      1472.31 o
  -3   5   9       9943.89      11806.02       386.53 o
  -2   5   9      74881.66      77147.80      1457.90 o
  -1   5   9      17036.01      15196.01       336.01 o
   0   5   9       7168.90       7041.25       239.66 o
   1   5   9      16954.34      15317.30       384.49 o
   2   5   9      77431.54      82223.18       805.17 o
   3   5   9      13159.28      14888.19       326.54 o
   4   5   9      29503.75      32982.27       581.10 o
   5   5   9      23412.32      24297.73       805.63 o
   6   5   9        456.19        890.77       187.00 o
   7   5   9       2984.94       3496.73       329.99 o
   8   5   9       4829.98       4875.14       413.44 o
   9   5   9       5586.50       5593.41       443.11 o
  10   5   9       3826.22       2888.53       350.98 o
  11   5   9       1065.44        642.07       191.90 o
  12   5   9       1336.17       1434.04       270.39 o
  13   5   9         73.09         73.15       122.19 o
  14   5   9       1011.47        890.51       237.31 o
  15   5   9       1969.44       2157.30       361.83 o
  16   5   9        757.30        912.00       273.04 o
 -16   6   9        632.04        752.29       246.47 o
 -15   6   9        959.78       1268.88       287.56 o
 -14   6   9       2483.06       2397.42       378.09 o
 -13   6   9       2989.79       2842.18       386.34 o
 -12   6   9        174.08        601.34       204.20 o
 -11   6   9       1396.45       1234.19       255.53 o
 -10   6   9       1986.67       2053.61       308.85 o
  -9   6   9       3953.75       3935.64       411.20 o
  -8   6   9       9107.05       9925.47       603.19 o
  -7   6   9      10164.40       9025.14       560.05 o
  -6   6   9      15128.15      14034.35       673.80 o
  -5   6   9      12276.53      12067.39       618.69 o
  -4   6   9      14881.07      16050.80       689.09 o
  -3   6   9      23753.76      30368.45      1020.72 o
  -2   6   9       6841.82       5819.52       158.52 o
  -1   6   9      14825.31      21163.40       492.63 o
   0   6   9     112256.83     126475.04      1148.71 o
   1   6   9      11662.53      17368.79       547.12 o
   2   6   9       7508.09       6729.92       239.75 o
   3   6   9      23094.09      28742.80       489.83 o
   4   6   9      13429.09      15509.66       490.36 o
   5   6   9      11832.62      12352.39       445.31 o
   6   6   9      16449.54      15576.81       704.03 o
   7   6   9      12613.57      10538.21       605.69 o
   8   6   9       9571.29      10542.05       621.77 o
   9   6   9       4070.74       3659.25       390.66 o
  10   6   9       2046.05       2269.97       319.74 o
  11   6   9       1287.35       1063.06       238.60 o
  12   6   9        269.78        458.28       186.93 o
  13   6   9       2639.29       2828.91       384.63 o
  14   6   9       2264.44       2329.79       367.57 o
  15   6   9       1240.09       1253.45       294.86 o
  16   6   9        651.61        739.43       254.12 o
 -15   7   9       1404.60       1527.94       319.83 o
 -14   7   9       1311.99       1228.61       276.78 o
 -13   7   9         80.52         75.56       114.55 o
 -12   7   9        611.33       1085.28       254.94 o
 -11   7   9        426.07        332.90       157.60 o
 -10   7   9       1774.10       1859.03       301.92 o
  -9   7   9        916.54        919.58       218.43 o
  -8   7   9        381.06        327.28       152.78 o
  -7   7   9        265.43        356.60       135.88 o
  -6   7   9       3557.42       3471.85       366.88 o
  -5   7   9       9845.45      10390.95       598.98 o
  -4   7   9      15494.75      14265.26       700.28 o
  -3   7   9      52167.86      65022.39      1504.17 o
  -2   7   9        780.82        787.42        79.49 o
  -1   7   9      37565.68      44713.14       763.41 o
   0   7   9       6065.90       5993.80       249.27 o
   1   7   9      39903.46      45212.82      1263.37 o
   2   7   9        307.57        363.09       155.21 o
   3   7   9      53896.24      67144.87      1147.05 o
   4   7   9      14497.75      13079.86       480.28 o
   5   7   9       9196.84       8930.84       531.41 o
   6   7   9       4527.40       4533.61       432.76 o
   7   7   9        218.38        317.98       137.89 o
   8   7   9        351.26        424.97       165.65 o
   9   7   9       1440.97       1652.15       281.33 o
  10   7   9       1623.69       1669.19       288.19 o
  11   7   9        607.27        656.25       216.34 o
  12   7   9        768.23       1139.31       257.38 o
  13   7   9        151.91        177.26       126.61 o
  14   7   9       1197.19       1145.64       271.53 o
  15   7   9       1389.38       1603.96       331.90 o
 -15   8   9        475.46        525.46       220.72 o
 -14   8   9         84.65         59.89       129.42 o
 -13   8   9       3111.46       3254.63       433.87 o
 -12   8   9       3699.57       3870.85       462.34 o
 -11   8   9       3546.75       4300.68       469.61 o
 -10   8   9       8459.91       8246.41       626.40 o
  -9   8   9       2408.61       2338.73       346.42 o
  -8   8   9        316.38        298.31       153.58 o
  -7   8   9       2673.19       2363.81       333.31 o
  -6   8   9       1559.70       1677.25       287.06 o
  -5   8   9       1697.15       1061.14       242.43 o
  -4   8   9       1955.43       2193.67       305.38 o
  -3   8   9       6484.53       6053.52       232.71 o
  -2   8   9       5202.34       4278.69       194.96 o
  -1   8   9      19778.78      20769.87       615.54 o
   0   8   9         51.67        155.76        67.02 o
   1   8   9      20326.75      18731.09       671.38 o
   2   8   9       4290.62       3719.91       391.27 o
   3   8   9       5604.71       5859.64       479.30 o
   4   8   9       3170.04       3788.64       465.42 o
   5   8   9       1876.57       1568.25       436.63 o
   6   8   9       1373.59       1828.25       302.70 o
   7   8   9       1875.48       1726.77       279.07 o
   8   8   9        367.82        459.14       172.08 o
   9   8   9       2261.43       2460.44       345.57 o
  10   8   9       7246.01       6831.28       571.13 o
  11   8   9       4033.92       4943.21       502.06 o
  12   8   9       3725.21       3819.33       451.87 o
  13   8   9       2877.86       2659.96       397.95 o
  14   8   9        110.08         54.26       133.44 o
  15   8   9        333.65        472.75       201.80 o
 -15   9   9        498.88        424.96       180.52 o
 -14   9   9        341.36        347.33       197.38 o
 -13   9   9        251.85        498.86       209.03 o
 -12   9   9       1721.26       1532.89       321.95 o
 -11   9   9        685.60        886.69       269.43 o
 -10   9   9        182.29        199.78       148.73 o
  -9   9   9       4000.70       3578.47       433.19 o
  -8   9   9        372.90        804.49       236.00 o
  -7   9   9        166.19         71.95       117.78 o
  -6   9   9       3311.11       2626.65       366.19 o
  -5   9   9       2231.34       2496.28       345.27 o
  -4   9   9       6046.75       7414.42       797.20 o
  -3   9   9       2360.24       2790.20       170.46 o
  -2   9   9        409.44        573.29       101.16 o
  -1   9   9      33209.97      33850.39       644.87 o
   0   9   9      20734.92      18467.87       407.46 o
   1   9   9      33937.77      33714.16      1375.68 o
   2   9   9        635.37        444.05       146.81 o
   3   9   9       2316.53       2183.48       264.98 o
   4   9   9       5441.84       7429.56       557.66 o
   5   9   9       1750.19       2066.52       309.25 o
   6   9   9       4118.71       3314.61       395.15 o
   7   9   9        290.92        288.25       150.36 o
   8   9   9        473.61        602.32       220.74 o
   9   9   9       4172.42       3433.39       422.77 o
  10   9   9        133.24         50.24       117.77 o
  11   9   9        756.56        890.76       265.02 o
  12   9   9       1665.00       1582.72       338.84 o
  13   9   9        280.05        496.86       218.28 o
  14   9   9        192.50        274.14       183.70 o
  15   9   9        591.05        726.53       243.25 o
 -14  10   9         85.02        155.55       159.16 o
 -13  10   9        945.82       1149.82       284.34 o
 -12  10   9        114.28        284.97       159.97 o
 -11  10   9        898.46        447.23       182.19 o
 -10  10   9       1042.18       1426.37       288.01 o
  -9  10   9       3870.83       3338.38       435.09 o
  -8  10   9        138.85        204.59       164.00 o
  -7  10   9        463.80        441.89       163.65 o
  -6  10   9       1730.01       2019.77       316.83 o
  -5  10   9       7682.05       7314.30       864.16 o
  -4  10   9       2031.85       1787.75       362.69 o
  -3  10   9        839.37        673.08        96.13 o
  -2  10   9       4346.89       4295.72       270.67 o
  -1  10   9       8661.70       9158.57       326.52 o
   0  10   9        710.91        759.13        84.65 o
   1  10   9       9058.95       8732.24       442.77 o
   2  10   9       4215.91       3682.16       438.92 o
   3  10   9       1168.63        691.82       363.58 o
   4  10   9       1812.85       1020.38       266.57 o
   5  10   9       8395.40       8168.68       629.08 o
   6  10   9       1257.88       1120.28       247.07 o
   7  10   9        543.96        524.35       179.34 o
   8  10   9         97.12         -5.63       109.73 o
   9  10   9       3718.54       3633.89       447.94 o
  10  10   9       1147.12       1199.60       276.37 o
  11  10   9        870.45        763.33       219.19 o
  12  10   9        116.71        248.40       176.45 o
  13  10   9        884.48        896.01       267.03 o
  14  10   9         78.19         13.67       139.07 o
 -13  11   9        350.18        441.80       217.08 o
 -12  11   9        526.03        488.10       208.67 o
 -11  11   9        407.68        681.04       246.85 o
 -10  11   9        769.26        928.96       271.85 o
  -9  11   9       1948.95       2133.89       357.86 o
  -8  11   9       1368.44       1772.45       328.34 o
  -7  11   9       3063.05       3370.25       449.74 o
  -6  11   9       1208.46       1346.27       279.63 o
  -5  11   9        855.65        975.60       148.46 o
  -4  11   9       1521.46       1516.19       176.13 o
  -3  11   9       1053.39       1279.62       195.43 o
  -2  11   9       4881.25       5822.58       285.43 o
  -1  11   9       2687.59       3080.13       166.96 o
   0  11   9        341.74        620.20        89.31 o
   1  11   9       2111.59       2332.57       281.88 o
   2  11   9       4543.10       4811.14       307.96 o
   3  11   9       1176.94        847.94       352.49 o
   4  11   9       1305.67       1454.35       308.25 o
   5  11   9        621.30        760.45       224.80 o
   6  11   9       1353.85       1390.71       287.32 o
   7  11   9       2742.48       2961.58       426.25 o
   8  11   9       1394.32       1645.34       317.48 o
   9  11   9       1724.12       2078.76       357.39 o
  10  11   9        644.63        782.90       250.11 o
  11  11   9        414.61        683.05       231.97 o
  12  11   9        564.19        507.41       210.68 o
  13  11   9        354.97        539.09       228.34 o
 -13  12   9       1058.66       1070.23       308.48 o
 -12  12   9        336.11        214.67       175.27 o
 -11  12   9       2813.21       2937.47       453.87 o
 -10  12   9         68.13        102.09       139.07 o
  -9  12   9        930.20        740.04       242.93 o
  -8  12   9        129.46        184.90       154.35 o
  -7  12   9       1503.59       1370.62       308.65 o
  -6  12   9        734.81        951.51       255.37 o
  -5  12   9        257.98        284.61       168.44 o
  -4  12   9       1128.51       1861.14       364.50 o
  -3  12   9       3127.42       3589.64       406.91 o
  -2  12   9       1580.32       1588.35       172.35 o
  -1  12   9       1350.17       1873.83       143.84 o
   0  12   9       4480.49       3215.38       238.19 o
   1  12   9       1632.77       1921.52       212.43 o
   2  12   9       1262.91       1002.56       235.35 o
   3  12   9       3164.30       3225.50       292.45 o
   4  12   9       1342.26       1468.76       311.06 o
   5  12   9        473.82        681.52       234.01 o
   6  12   9        724.15        722.68       224.00 o
   7  12   9       1256.87        944.67       259.50 o
   8  12   9        314.70        240.80       159.60 o
   9  12   9       1121.67        997.60       272.33 o
  10  12   9         89.58        321.14       200.16 o
  11  12   9       2815.80       2982.99       446.62 o
  12  12   9        277.86         75.17       127.03 o
  13  12   9       1139.01       1048.17       328.61 o
 -12  13   9        122.62         94.46       147.51 o
 -11  13   9        444.37        512.19       220.31 o
 -10  13   9        683.87        559.33       232.01 o
  -9  13   9        489.63        441.45       182.93 o
  -8  13   9        452.76        170.47       148.35 o
  -7  13   9         90.85        156.35       141.08 o
  -6  13   9        665.30        636.56       226.40 o
  -5  13   9       2544.90       3669.61       492.18 o
  -4  13   9       4046.05       4085.50       525.11 o
  -3  13   9       1512.55       1259.30       209.75 o
  -2  13   9       1298.99       1369.70       170.04 o
  -1  13   9       4924.54       4778.66       283.16 o
   0  13   9        306.41        168.15       144.25 o
   1  13   9       5323.76       5078.76       337.70 o
   2  13   9       1854.19       1741.06       212.07 o
   3  13   9       1100.99        892.43       155.26 o
   4  13   9       3825.64       4047.23       518.96 o
   5  13   9       2770.12       3798.01       491.07 o
   6  13   9        603.87        416.18       203.46 o
   7  13   9        114.56        334.42       182.48 o
   8  13   9        302.76        113.77       159.59 o
   9  13   9        463.86        310.38       182.53 o
  10  13   9        832.25        825.21       275.07 o
  11  13   9        383.04        475.18       231.96 o
  12  13   9        148.01        386.67       216.65 o
 -11  14   9       1221.88       1884.48       392.58 o
 -10  14   9         69.61         -9.65       141.88 o
  -9  14   9        329.62        258.89       171.25 o
  -8  14   9        606.00        728.58       278.64 o
  -7  14   9        919.64       1147.43       310.49 o
  -6  14   9        204.24        292.63       166.41 o
  -5  14   9        229.91        -15.68       130.64 o
  -4  14   9        127.60        446.56       238.35 o
  -3  14   9        683.38        593.42       133.37 o
  -2  14   9        823.86        796.29       129.45 o
  -1  14   9        113.57        144.93       113.65 o
   0  14   9          5.79         12.21        83.67 o
   1  14   9         90.33         65.91        82.31 o
   2  14   9        798.44        825.87       155.09 o
   3  14   9        768.16        720.30       160.49 o
   4  14   9        182.59        678.92       271.33 o
   5  14   9        219.14        271.74       180.89 o
   6  14   9        233.45        294.65       187.72 o
   7  14   9        807.01       1048.01       294.37 o
   8  14   9        446.04        718.44       264.54 o
   9  14   9        424.35        411.27       196.19 o
  10  14   9         85.59         55.06       145.10 o
  11  14   9       1117.87       1508.28       360.38 o
  -9  15   9         30.94        -63.10       151.52 o
  -8  15   9        197.53        430.50       234.34 o
  -7  15   9        132.82        185.70       184.89 o
  -6  15   9        549.47        589.83       264.96 o
  -5  15   9        262.23        148.33       136.67 o
  -4  15   9         35.66         26.49       123.71 o
  -3  15   9       1691.21       2085.11       300.86 o
  -2  15   9       2429.69       2519.75       218.15 o
  -1  15   9       2794.66       3029.33       243.77 o
   0  15   9        273.11        418.07       114.36 o
   1  15   9       2802.72       2695.75       236.46 o
   2  15   9       2780.05       2706.17       264.08 o
   3  15   9       1524.58       1909.68       328.15 o
   4  15   9         63.88         52.16       112.66 o
   5  15   9        250.43         63.51       145.52 o
   6  15   9        388.69        418.91       215.48 o
   7  15   9        102.20        -44.61       155.55 o
   8  15   9        187.40        302.27       224.29 o
   9  15   9         79.31        196.54       204.98 o
  -8  16   9        334.16        228.33       214.67 o
  -7  16   9        344.59        400.39       237.58 o
  -6  16   9         81.99         -7.64       156.35 o
  -5  16   9        130.45        257.24       180.47 o
  -4  16   9         15.97         57.02       108.12 o
  -3  16   9       1213.73       1083.22       238.95 o
  -2  16   9         76.03         81.30       121.46 o
  -1  16   9       1545.02       1723.47       186.47 o
   0  16   9       1644.12       1734.96       195.02 o
   1  16   9       1426.89       1403.29       178.84 o
   2  16   9         43.96        -14.11        90.23 o
   3  16   9       1443.20       1382.40       197.34 o
   4  16   9         56.38         24.34        91.70 o
   5  16   9         98.54        398.72       204.58 o
   6  16   9         93.20         59.89       174.44 o
   7  16   9        320.85        348.93       214.66 o
   8  16   9        314.51        560.37       268.93 o
  -6  17   9         28.29        271.29       221.05 o
  -5  17   9       1195.44       1069.89       225.81 o
  -4  17   9        274.34        533.52       273.35 o
  -3  17   9        144.43        214.65       181.48 o
  -2  17   9        805.38       1109.83       238.69 o
  -1  17   9        638.17        564.10       147.68 o
   0  17   9        367.33        437.73       135.96 o
   1  17   9        667.30        378.30        97.68 o
   2  17   9        851.91        857.77       202.65 o
   3  17   9        138.86        162.23       126.32 o
   4  17   9        303.26        110.07       130.88 o
   5  17   9       1089.32       1085.04       186.70 o
   6  17   9         25.14        147.10       182.07 o
  -2  18   9         38.96        -52.95       137.90 o
  -1  18   9       2147.67       2236.76       330.01 o
   0  18   9         64.84       -124.22       139.97 o
   1  18   9       2168.48       2224.29       332.95 o
   2  18   9         43.03         15.99       125.92 o
   0   0  10        183.00        336.81        71.66 o
   1   0  10       3130.42       2404.20       108.14 o
   2   0  10      26712.99      20853.84       309.90 o
   3   0  10       1459.07       1499.19        67.41 o
   4   0  10        744.91       2704.33       104.11 o
   5   0  10       2277.50       3755.80       132.30 o
   6   0  10     100643.91     103980.13      1014.53 o
   7   0  10      43262.26      43141.51       717.12 o
   8   0  10      33572.53      33999.11       672.65 o
   9   0  10      14292.29      15855.93       489.10 o
  10   0  10       5450.21       5638.11       307.18 o
  11   0  10        155.56        433.03       127.04 o
  12   0  10       7186.33       6327.31       355.34 o
  13   0  10        283.34        449.68       124.88 o
  14   0  10       5573.36       6039.78       372.49 o
  15   0  10         85.97        334.97       187.90 o
  16   0  10        550.66        780.61       156.60 o
  17   0  10         19.77         52.71        90.11 o
 -17   1  10        973.38       1055.70       197.36 o
 -16   1  10        837.37        949.06       178.03 o
 -15   1  10        686.39       1140.26       187.53 o
 -14   1  10       1932.38       1716.43       342.75 o
 -13   1  10        482.79        686.53       132.40 o
 -12   1  10       1439.33       1400.95       178.20 o
 -11   1  10       4524.26       4145.71       281.69 o
 -10   1  10        834.10        578.75       110.05 o
  -9   1  10       4394.39       5306.87       281.29 o
  -8   1  10       4053.15       3301.23       214.68 o
  -7   1  10      16186.68      12755.66       488.23 o
  -6   1  10      27304.74      28687.54       596.68 o
  -5   1  10      16604.24      14303.68       274.61 o
  -4   1  10       9061.83       9931.36       351.82 o
  -3   1  10      10233.47       6043.48       126.43 o
  -2   1  10        599.87        994.97        41.81 o
  -1   1  10     166092.72     216300.19      2363.97 o
   0   1  10      29925.12      38090.38       521.58 o
   1   1  10     162700.59     210623.98      1601.50 o
   2   1  10       1995.76        562.76        35.13 o
   3   1  10      10915.81       6969.19       224.87 o
   4   1  10       8289.42       9654.94       234.36 o
   5   1  10      14217.44      12287.35       267.07 o
   6   1  10      27547.88      29026.56       803.32 o
   7   1  10      13951.11      11947.30       472.38 o
   8   1  10       3812.10       2702.38       196.66 o
   9   1  10       4979.19       6554.13       313.99 o
  10   1  10        562.94        498.65       108.61 o
  11   1  10       4711.33       4304.46       287.26 o
  12   1  10       1604.28       1609.12       274.50 o
  13   1  10        457.83        758.59       145.82 o
  14   1  10       2167.36       1973.77       309.80 o
  15   1  10        771.14       1202.21       187.55 o
  16   1  10        804.37        828.56       170.85 o
  17   1  10        974.21       1032.38       196.36 o
 -17   2  10        282.45        351.82       131.01 o
 -16   2  10        114.51         83.16        87.04 o
 -15   2  10       1053.30        876.29       160.98 o
 -14   2  10       3999.84       3627.68       294.35 o
 -13   2  10       1091.21       1244.38       173.82 o
 -12   2  10        266.00        190.22        97.28 o
 -11   2  10       1726.23       1573.08       185.12 o
 -10   2  10       5052.65       4977.02       289.56 o
  -9   2  10       3974.02       4762.01       269.36 o
  -8   2  10       6535.94       9047.27       345.79 o
  -7   2  10      19641.72      17014.46       454.04 o
  -6   2  10      10431.98      11308.09       433.13 o
  -5   2  10      12883.39      15491.60       448.77 o
  -4   2  10      39784.21      36747.35       380.28 o
  -3   2  10      32176.78      32219.46      1068.03 o
  -2   2  10       4777.84       6297.87       234.43 o
  -1   2  10      12619.30      11650.34       265.29 o
   0   2  10      13353.35       8322.08       211.71 o
   1   2  10      12600.83      11570.81       309.29 o
   2   2  10       3875.75       5656.78       341.99 o
   3   2  10      31583.95      32902.17      1399.61 o
   4   2  10      41106.06      38171.36       786.17 o
   5   2  10      10768.45      13624.94       436.04 o
   6   2  10      10881.97      12588.19       412.51 o
   7   2  10      19296.23      17334.16       460.80 o
   8   2  10       6841.46       9488.03       356.65 o
   9   2  10       4207.88       5118.77       281.11 o
  10   2  10       4972.16       4977.55       293.58 o
  11   2  10       1512.05       1553.51       179.39 o
  12   2  10        599.36        352.82       203.27 o
  13   2  10       1197.54       1602.03       197.32 o
  14   2  10       3665.05       3629.86       295.67 o
  15   2  10       1331.54       1362.89       222.27 o
  16   2  10         21.19        189.52       103.44 o
  17   2  10        363.46        443.42       143.66 o
 -16   3  10        610.38        901.29       177.91 o
 -15   3  10        463.58        466.81       129.89 o
 -14   3  10       1904.03       1697.74       205.75 o
 -13   3  10        239.85        278.73       102.09 o
 -12   3  10       2039.34       1365.46       175.61 o
 -11   3  10       2171.72       2203.61       208.78 o
 -10   3  10       1300.81       1408.25       164.86 o
  -9   3  10       1622.07       1354.83       169.11 o
  -8   3  10       2032.35       2339.64       186.48 o
  -7   3  10      13880.13      13628.63       406.95 o
  -6   3  10        889.08        674.75       243.48 o
  -5   3  10       5929.87       6027.11       202.79 o
  -4   3  10      14238.35      17869.60       577.38 o
  -3   3  10       8697.03      12962.84       374.39 o
  -2   3  10      52222.50      37523.59       487.98 o
  -1   3  10       6480.87       5672.35       216.31 o
   0   3  10      34348.78      24382.20       343.79 o
   1   3  10       4435.53       4950.02       181.16 o
   2   3  10      57821.52      42048.15      1218.90 o
   3   3  10      10001.33      16196.13       683.74 o
   4   3  10      12293.20      16282.16       551.94 o
   5   3  10       4424.04       4767.75       182.71 o
   6   3  10       1613.33       1391.51       255.23 o
   7   3  10      16065.15      15653.19       444.88 o
   8   3  10       2051.21       2326.82       319.11 o
   9   3  10       1461.18       1302.79       159.23 o
  10   3  10        727.49        813.65       136.65 o
  11   3  10       2550.55       2765.53       231.77 o
  12   3  10       1518.80        997.03       155.88 o
  13   3  10        403.37        487.20       120.53 o
  14   3  10       1685.51       1709.90       209.00 o
  15   3  10        464.00        434.90       134.88 o
  16   3  10        468.05        455.54       144.33 o
 -16   4  10       1781.90       2139.32       257.03 o
 -15   4  10        522.72        587.67       144.02 o
 -14   4  10       3713.99       2999.82       413.54 o
 -13   4  10        391.48        542.37       142.28 o
 -12   4  10        988.58       1114.77       178.96 o
 -11   4  10       1075.78       1070.95       171.83 o
 -10   4  10       2230.79       2791.69       249.54 o
  -9   4  10       5858.13       5383.58       429.15 o
  -8   4  10       1459.73       1986.04       277.80 o
  -7   4  10      14603.09      18030.15       710.45 o
  -6   4  10      22690.28      25738.38       814.15 o
  -5   4  10      26533.62      32004.46       640.48 o
  -4   4  10       6893.06       7430.72       206.66 o
  -3   4  10      29737.55      33760.78       597.75 o
  -2   4  10      37195.69      30578.17      1595.25 o
  -1   4  10      39345.98      36052.35       897.11 o
   0   4  10      33558.13      22342.56       393.96 o
   1   4  10      41066.32      38418.96       966.54 o
   2   4  10      34689.07      28120.47       820.90 o
   3   4  10      32600.41      36744.21       890.94 o
   4   4  10       6815.43       7302.51       204.63 o
   5   4  10      24578.02      28872.37       475.36 o
   6   4  10      23687.25      26746.29       826.87 o
   7   4  10      13848.07      18684.38       729.41 o
   8   4  10       2741.67       3283.79       334.67 o
   9   4  10       5371.21       4301.36       393.75 o
  10   4  10       2289.72       2858.92       231.93 o
  11   4  10       1132.87        999.69       173.08 o
  12   4  10        969.21       1181.89       191.68 o
  13   4  10        474.16        593.78       142.57 o
  14   4  10       3271.27       2657.97       261.78 o
  15   4  10        535.69        621.28       153.63 o
  16   4  10       1905.07       2318.74       272.61 o
 -16   5  10       1048.91       1565.75       320.55 o
 -15   5  10        739.91        607.20       212.72 o
 -14   5  10       1385.33       1466.09       292.09 o
 -13   5  10        351.19        459.11       190.96 o
 -12   5  10       1281.44       1125.37       251.87 o
 -11   5  10       2136.25       1939.37       306.45 o
 -10   5  10        384.42        175.70       133.48 o
  -9   5  10        177.56          2.81        89.64 o
  -8   5  10       4921.66       5232.25       425.98 o
  -7   5  10       1171.82        976.44       206.88 o
  -6   5  10       6412.32       6896.41       445.09 o
  -5   5  10       6293.69       5986.58       409.25 o
  -4   5  10      17235.58      14402.74       437.17 o
  -3   5  10        158.44        193.45        67.38 o
  -2   5  10      38574.69      45291.48       979.04 o
  -1   5  10       2234.90       2147.88       130.30 o
   0   5  10        781.05       1343.77       112.52 o
   1   5  10       2303.00       2696.01       145.68 o
   2   5  10      40948.38      51431.61      2353.92 o
   3   5  10        187.28        206.60        48.34 o
   4   5  10      20758.53      17232.34       401.10 o
   5   5  10       6985.56       6596.67       432.79 o
   6   5  10       5536.74       5944.61       424.33 o
   7   5  10       1219.78       1314.60       220.98 o
   8   5  10       4607.12       5318.86       425.43 o
   9   5  10        191.00        131.85       109.74 o
  10   5  10        419.01        417.75       155.60 o
  11   5  10       2328.11       2172.10       316.17 o
  12   5  10       1156.16        949.84       228.91 o
  13   5  10        360.42        510.97       183.32 o
  14   5  10       1376.08       1279.00       280.42 o
  15   5  10        900.90        955.55       264.22 o
  16   5  10       1109.14       1513.93       318.15 o
 -16   6  10       1043.87       1297.87       302.45 o
 -15   6  10       1111.75       1755.30       341.49 o
 -14   6  10        576.98        892.21       244.87 o
 -13   6  10        405.03        419.32       196.19 o
 -12   6  10       1583.85       1598.89       289.76 o
 -11   6  10       2236.27       1917.28       308.07 o
 -10   6  10        593.89        559.77       173.32 o
  -9   6  10       4428.85       3840.11       385.54 o
  -8   6  10       3328.74       3237.79       345.28 o
  -7   6  10        451.65        510.69       160.44 o
  -6   6  10       3685.96       3877.82       371.47 o
  -5   6  10      10526.32      10096.49       550.27 o
  -4   6  10      16384.18      15663.99       680.42 o
  -3   6  10       2709.54       1885.50       178.32 o
  -2   6  10       4851.11       6629.92       232.99 o
  -1   6  10      13597.27      14982.05       552.16 o
   0   6  10       2385.04       3193.27       255.31 o
   1   6  10      11999.35      12330.04       923.98 o
   2   6  10       3871.43       5409.51       218.73 o
   3   6  10       2326.25       1751.30       141.64 o
   4   6  10      15909.85      17477.75      1896.64 o
   5   6  10       9926.91       8751.09       378.50 o
   6   6  10       3326.60       3698.09       361.62 o
   7   6  10        600.10        511.98       160.87 o
   8   6  10       3061.36       2526.33       316.14 o
   9   6  10       4150.57       3855.98       386.65 o
  10   6  10        444.25        429.42       159.22 o
  11   6  10       1709.90       1655.15       290.62 o
  12   6  10       1404.90       1315.78       268.79 o
  13   6  10        349.32        313.57       184.53 o
  14   6  10        835.16        999.36       265.02 o
  15   6  10       1009.54       1499.38       320.55 o
  16   6  10        938.74       1026.32       270.25 o
 -15   7  10        177.68        144.30       160.78 o
 -14   7  10         40.97        151.52       150.72 o
 -13   7  10        311.26        146.73       121.81 o
 -12   7  10       3833.61       3759.89       445.09 o
 -11   7  10         37.82         -1.61       112.14 o
 -10   7  10       5192.51       6052.77       510.02 o
  -9   7  10       3221.79       2618.16       339.06 o
  -8   7  10       3779.11       3064.43       360.71 o
  -7   7  10        286.85        883.26       196.59 o
  -6   7  10       2244.51       2518.96       319.96 o
  -5   7  10       1245.62       1221.69       239.11 o
  -4   7  10      12683.78      14893.88       712.68 o
  -3   7  10       6407.78       6450.30       493.09 o
  -2   7  10      15413.45      17488.32       313.33 o
  -1   7  10      33221.92      34187.45       757.96 o
   0   7  10        666.33        884.22       206.14 o
   1   7  10      29843.23      29392.86       896.02 o
   2   7  10      17666.48      20128.89       815.62 o
   3   7  10       5648.49       5604.11       348.57 o
   4   7  10      12958.79      14031.26       508.12 o
   5   7  10       1841.53       1985.70       200.15 o
   6   7  10       1938.52       2322.28       312.99 o
   7   7  10        520.09        996.09       207.10 o
   8   7  10       3257.55       2666.37       341.16 o
   9   7  10       3547.73       3027.52       364.17 o
  10   7  10       5036.20       5978.02       506.71 o
  11   7  10        185.83        233.95       149.13 o
  12   7  10       3756.93       3737.48       441.84 o
  13   7  10        283.19         22.11       151.95 o
  14   7  10         76.85        175.64       155.95 o
  15   7  10        220.11        264.49       183.70 o
 -15   8  10        306.81        294.66       161.60 o
 -14   8  10        236.36        214.65       148.73 o
 -13   8  10        681.54       1107.41       269.41 o
 -12   8  10       4614.91       3844.15       449.76 o
 -11   8  10        314.89        400.80       185.33 o
 -10   8  10       1949.90       2214.68       327.71 o
  -9   8  10       1596.67       1870.83       313.95 o
  -8   8  10       1213.34       1245.79       239.82 o
  -7   8  10       3010.44       2962.07       361.64 o
  -6   8  10      21605.25      22918.94       953.21 o
  -5   8  10        722.55        698.29       199.51 o
  -4   8  10       8622.31       8942.97       582.39 o
  -3   8  10       1121.62       1435.64       118.17 o
  -2   8  10      10038.33      11064.23       276.70 o
  -1   8  10      37898.70      40344.39       712.12 o
   0   8  10       4504.78       3916.60       216.16 o
   1   8  10      39289.49      40136.28       787.72 o
   2   8  10      11093.16      11560.09       663.41 o
   3   8  10       1408.11       1378.60       254.46 o
   4   8  10       8767.49       8532.18       425.86 o
   5   8  10        495.65        554.14       178.95 o
   6   8  10      21581.63      22346.54       926.44 o
   7   8  10       3121.86       2934.60       355.23 o
   8   8  10       1084.66       1104.41       232.15 o
   9   8  10       1711.81       1540.95       279.37 o
  10   8  10       2217.90       2604.60       357.59 o
  11   8  10        237.05        234.36       162.00 o
  12   8  10       4531.70       4270.23       479.18 o
  13   8  10        634.81        957.39       272.62 o
  14   8  10        275.82        145.52       137.48 o
  15   8  10        419.92        813.29       256.49 o
 -14   9  10         30.16        330.77       184.08 o
 -13   9  10       1181.08        699.52       241.75 o
 -12   9  10        620.23        606.76       215.52 o
 -11   9  10       1066.09       1035.79       259.45 o
 -10   9  10       3171.64       2503.74       365.51 o
  -9   9  10       2214.31       1787.17       320.55 o
  -8   9  10       5337.79       4471.31       467.73 o
  -7   9  10       1495.40       1230.84       265.25 o
  -6   9  10       2733.68       2909.16       372.01 o
  -5   9  10       6272.48       6166.18       513.88 o
  -4   9  10      13458.54      12085.40       967.52 o
  -3   9  10       4932.11       4825.94       218.40 o
  -2   9  10        189.68         -7.41        65.98 o
  -1   9  10        493.44        682.35       101.33 o
   0   9  10       2079.11       1485.01       144.64 o
   1   9  10        509.23        990.58       153.43 o
   2   9  10        237.15         84.83       102.11 o
   3   9  10       5025.03       4142.12       309.87 o
   4   9  10      13376.76      12067.73       715.12 o
   5   9  10       6326.38       6478.93       521.20 o
   6   9  10       2173.21       2187.65       329.09 o
   7   9  10       1966.50       1376.78       277.45 o
   8   9  10       5893.21       5100.41       497.07 o
   9   9  10       1801.15       1337.27       287.42 o
  10   9  10       3220.24       2784.73       389.30 o
  11   9  10       1302.91       1357.45       303.76 o
  12   9  10        699.19        770.46       244.89 o
  13   9  10       1043.22        664.05       244.14 o
  14   9  10         86.57        355.71       197.35 o
 -14  10  10        355.82        357.38       198.19 o
 -13  10  10        180.90        344.48       184.10 o
 -12  10  10        294.32        725.19       231.15 o
 -11  10  10        668.56        616.44       224.78 o
 -10  10  10        641.86        736.27       232.82 o
  -9  10  10        338.03        820.52       248.05 o
  -8  10  10       3542.81       2710.93       387.45 o
  -7  10  10       2148.45       1897.56       327.81 o
  -6  10  10        467.24        408.12       184.16 o
  -5  10  10       2316.36       2934.22       233.71 o
  -4  10  10       8013.31       6421.06       331.51 o
  -3  10  10       9672.08       9921.28       446.54 o
  -2  10  10       3364.31       2643.92       269.67 o
  -1  10  10       1698.20       1159.64       100.26 o
   0  10  10        996.40        869.23       119.65 o
   1  10  10       1438.81        983.09       143.22 o
   2  10  10       3181.18       2994.21       385.57 o
   3  10  10       8871.96       8814.57       833.19 o
   4  10  10       8043.11       6958.28       589.28 o
   5  10  10       2509.49       3102.12       391.64 o
   6  10  10        464.46        477.68       187.37 o
   7  10  10       1837.21       1818.91       324.09 o
   8  10  10       3643.73       2943.83       401.60 o
   9  10  10        513.59        470.84       206.67 o
  10  10  10        638.26        482.94       193.01 o
  11  10  10        640.95        718.96       223.57 o
  12  10  10        183.88        192.94       130.64 o
  13  10  10        260.58        360.17       199.38 o
  14  10  10        427.10        588.96       227.95 o
 -13  11  10       1883.24       1990.01       381.10 o
 -12  11  10        201.19        127.82       166.41 o
 -11  11  10        434.34        447.87       198.61 o
 -10  11  10       1479.64       1266.26       294.94 o
  -9  11  10        207.67        321.98       188.93 o
  -8  11  10       1628.81       1303.57       290.17 o
  -7  11  10        917.49       1067.92       268.29 o
  -6  11  10       1615.32       1304.50       284.97 o
  -5  11  10        111.59         23.65        58.32 o
  -4  11  10        428.92        238.14       125.04 o
  -3  11  10       4798.00       5041.64       358.85 o
  -2  11  10        999.34       1249.42       145.52 o
  -1  11  10       1372.45       1447.77       117.36 o
   0  11  10       1313.12       1259.25       174.38 o
   1  11  10       1079.65        981.24       186.16 o
   2  11  10       1046.28       1077.45       158.01 o
   3  11  10       4513.76       4104.26       525.24 o
   4  11  10        346.32        313.19       151.57 o
   5  11  10         50.08         47.43       114.95 o
   6  11  10       1431.26       1179.12       272.45 o
   7  11  10        940.58        881.71       253.81 o
   8  11  10       1621.19       1309.59       295.00 o
   9  11  10        257.90        365.41       190.54 o
  10  11  10       1561.66       1242.60       301.39 o
  11  11  10        462.89        373.10       190.17 o
  12  11  10        185.51        177.67       145.11 o
  13  11  10       1994.19       1890.35       377.10 o
 -12  12  10         29.36         21.30       157.15 o
 -11  12  10        683.02        640.15       245.28 o
 -10  12  10        879.17        742.81       256.58 o
  -9  12  10        987.76       1070.69       282.35 o
  -8  12  10       2850.51       2978.52       433.85 o
  -7  12  10       2888.34       3043.32       439.13 o
  -6  12  10        777.64       1192.85       288.36 o
  -5  12  10       1040.67        858.86       250.62 o
  -4  12  10       2529.00       2707.04       419.75 o
  -3  12  10        421.05        621.93       157.31 o
  -2  12  10       1621.88       1373.92       114.61 o
  -1  12  10        196.04        244.14        83.56 o
   0  12  10       6181.14       5648.62       303.95 o
   1  12  10        231.17        188.44        81.54 o
   2  12  10       1998.31       1870.71       198.87 o
   3  12  10        312.21        359.01       190.96 o
   4  12  10       2295.94       1842.17       343.14 o
   5  12  10        779.75        773.80       244.13 o
   6  12  10        563.13        726.19       230.00 o
   7  12  10       2720.20       3270.48       442.70 o
   8  12  10       2380.26       1941.30       345.09 o
   9  12  10       1029.53        950.86       270.30 o
  10  12  10        859.61        705.80       237.68 o
  11  12  10        711.71        397.29       223.17 o
  12  12  10         26.78       -101.68       152.73 o
 -12  13  10        110.35         95.66       160.37 o
 -11  13  10         18.89         96.06       157.55 o
 -10  13  10       1404.22       1643.44       350.41 o
  -9  13  10         59.62       -222.67       222.67 o
  -8  13  10       2101.69       2400.03       405.78 o
  -7  13  10          5.59       -118.96       154.33 o
  -6  13  10       1754.29       1840.14       352.57 o
  -5  13  10       2866.13       2705.28       416.57 o
  -4  13  10        743.33       1202.06       312.88 o
  -3  13  10       2271.96       2563.08       235.93 o
  -2  13  10        979.78       1192.60       215.29 o
  -1  13  10        242.09        269.84        93.59 o
   0  13  10      13099.32      11806.22       453.80 o
   1  13  10        312.02        226.47       103.42 o
   2  13  10       1010.30       1017.76       229.84 o
   3  13  10       2239.81       1498.55       234.30 o
   4  13  10        791.44       1384.30       325.36 o
   5  13  10       2453.21       2139.31       379.37 o
   6  13  10       1622.81       1940.96       356.96 o
   7  13  10         29.30        202.97       173.63 o
   8  13  10       2154.75       2281.78       396.94 o
   9  13  10        104.48        -87.62       171.22 o
  10  13  10       1475.18       1592.43       344.40 o
  11  13  10         37.39        255.62       202.57 o
  12  13  10        105.25         81.19       143.89 o
 -10  14  10        507.18        861.18       289.07 o
  -9  14  10        458.51        303.54       179.71 o
  -8  14  10        356.76        434.57       207.84 o
  -7  14  10        879.35        853.01       276.69 o
  -6  14  10        576.63        254.52       188.98 o
  -5  14  10       2361.68       1966.58       379.71 o
  -4  14  10       4211.27       4168.65       556.52 o
  -3  14  10       1688.73       1557.09       262.87 o
  -2  14  10        169.41         78.96        73.94 o
  -1  14  10        122.51        195.09        95.97 o
   0  14  10        150.29         59.59       143.19 o
   1  14  10        204.01        152.16       137.33 o
   2  14  10        116.57          6.72        82.31 o
   3  14  10       1675.71       1441.19       241.32 o
   4  14  10       4436.40       4165.37       548.15 o
   5  14  10       2078.68       1178.72       305.55 o
   6  14  10        634.14        417.78       207.89 o
   7  14  10        652.27        823.91       273.43 o
   8  14  10        331.29        443.81       199.80 o
   9  14  10        433.55        427.76       211.07 o
  10  14  10        550.12       1062.64       307.17 o
  -9  15  10       2177.58       3050.99       485.82 o
  -8  15  10       1512.72       1454.84       355.66 o
  -7  15  10        220.23        723.54       268.51 o
  -6  15  10        825.74       1060.47       289.15 o
  -5  15  10        162.74        115.76       161.99 o
  -4  15  10         57.21        -33.05       179.86 o
  -3  15  10         33.63        121.92       135.25 o
  -2  15  10       2453.79       2472.92       217.31 o
  -1  15  10        645.27        777.63       133.92 o
   0  15  10       1931.99       2157.39       211.86 o
   1  15  10        590.02        683.01       125.04 o
   2  15  10       2249.54       2373.88       251.80 o
   3  15  10         49.98         14.95       101.69 o
   4  15  10         24.30         29.25       109.87 o
   5  15  10        147.52          0.40       133.85 o
   6  15  10        783.33       1352.39       339.81 o
   7  15  10        200.76        378.65       231.93 o
   8  15  10       1502.51        997.38       301.75 o
   9  15  10       2246.11       2907.03       480.21 o
  -8  16  10        572.32        773.56       299.53 o
  -7  16  10        739.94       1224.02       344.61 o
  -6  16  10        587.81        850.38       281.05 o
  -5  16  10        521.16        176.90       162.03 o
  -4  16  10         77.53         61.61       263.46 o
  -3  16  10        103.39        180.77       304.87 o
  -2  16  10        188.28        -55.55       135.28 o
  -1  16  10        431.74        645.46       134.45 o
   0  16  10       2583.89       3392.07       293.98 o
   1  16  10        247.10        376.08       148.88 o
   2  16  10        148.31        -33.74        87.36 o
   3  16  10        112.74         88.39        82.90 o
   4  16  10         99.96         75.20       133.85 o
   5  16  10        461.55        166.04       175.69 o
   6  16  10        802.15        701.72       270.63 o
   7  16  10        785.00       1292.82       345.02 o
   8  16  10        563.81        684.70       282.24 o
  -6  17  10        985.75       1450.23       370.80 o
  -5  17  10        161.23        162.12       128.22 o
  -4  17  10        148.86        159.45       268.70 o
  -3  17  10        690.77       1197.12       236.01 o
  -2  17  10        923.31       1040.60       229.54 o
  -1  17  10       1008.78       1188.33       207.10 o
   0  17  10        378.01        602.18       145.54 o
   1  17  10       1026.29        868.62       182.11 o
   2  17  10        965.31        989.79       173.54 o
   3  17  10        758.30       1002.97       224.27 o
   4  17  10        163.51          7.54       119.88 o
   5  17  10        124.99         55.21        95.60 o
   6  17  10        934.57       1281.28       350.68 o
  -2  18  10        109.19        137.86       121.63 o
  -1  18  10         96.20        143.34       138.87 o
   0  18  10         15.81         87.57       129.51 o
   1  18  10         93.17        237.28       135.61 o
   2  18  10        125.25        203.77       213.26 o
   1   0  11        654.61        516.98        54.76 o
   2   0  11      47535.01      28277.94       229.68 o
   3   0  11      27790.58      29050.31       525.31 o
   4   0  11      68980.84      65084.04       697.34 o
   5   0  11      29497.52      35081.46       392.25 o
   6   0  11      21870.11      20930.63       336.35 o
   7   0  11      49628.76      53513.19       793.56 o
   8   0  11       1582.65       1432.83       162.30 o
   9   0  11      15266.69      18265.43       517.69 o
  10   0  11      10532.60       9125.10       396.37 o
  11   0  11      12437.26      12265.44       480.40 o
  12   0  11       5447.59       4105.23       299.53 o
  13   0  11        418.22        291.56        96.04 o
  14   0  11       1592.35       1655.41       219.52 o
  15   0  11       3377.90       2984.87       284.48 o
  16   0  11         38.24        189.47       115.94 o
  17   0  11        771.56        869.00       180.49 o
 -17   1  11         79.86         82.09       144.89 o
 -16   1  11        633.86        835.89       168.91 o
 -15   1  11        863.75       1040.86       178.37 o
 -14   1  11        568.99        711.81       149.13 o
 -13   1  11       3332.03       2443.65       239.48 o
 -12   1  11       1100.27       1062.84       159.75 o
 -11   1  11       7397.22       7054.87       357.43 o
 -10   1  11         51.62         97.83        72.19 o
  -9   1  11       1529.91       1511.31       157.30 o
  -8   1  11       3941.93       3043.79       346.96 o
  -7   1  11      24837.60      25147.54      1209.20 o
  -6   1  11       4790.91       3088.57       133.34 o
  -5   1  11        911.55       1061.66        82.30 o
  -4   1  11      17745.50      20605.21       880.09 o
  -3   1  11       3944.99       7321.08       148.39 o
  -2   1  11       7139.31       3128.37        86.44 o
  -1   1  11      14098.69       6439.75       202.17 o
   0   1  11      81888.65      79633.42      1189.56 o
   1   1  11      14239.75       6923.30       188.03 o
   2   1  11       4563.86       2167.21       110.05 o
   3   1  11       4065.64       7686.65       174.43 o
   4   1  11      15980.80      18143.63       751.24 o
   5   1  11        737.13        967.14        69.71 o
   6   1  11       3525.65       3055.24       180.42 o
   7   1  11      24771.91      24754.72      1864.46 o
   8   1  11       3922.03       2917.77       261.93 o
   9   1  11       1940.73       1388.91       162.53 o
  10   1  11         92.24         84.87        63.45 o
  11   1  11       6759.50       6416.28       357.22 o
  12   1  11       1141.60       1129.27       164.54 o
  13   1  11       3960.86       3228.59       273.98 o
  14   1  11        902.31       1024.01       169.29 o
  15   1  11       1093.24       1391.23       202.71 o
  16   1  11        764.90       1144.98       192.42 o
  17   1  11         99.58        134.22       123.97 o
 -17   2  11        122.16        322.28       126.75 o
 -16   2  11        805.28        497.64       139.72 o
 -15   2  11        851.53       1209.57       186.89 o
 -14   2  11        900.10       1191.56       255.59 o
 -13   2  11        548.99        634.25       130.79 o
 -12   2  11         17.74         64.81        75.41 o
 -11   2  11        884.26       1468.72       170.43 o
 -10   2  11        422.95        208.25        81.43 o
  -9   2  11        333.29        573.64       124.24 o
  -8   2  11      14548.59      13646.79       429.13 o
  -7   2  11       2600.22       3699.57       443.08 o
  -6   2  11       5456.52       5386.94       275.40 o
  -5   2  11      70789.83      68974.89       747.79 o
  -4   2  11      29360.34      25468.60       312.40 o
  -3   2  11      26533.30      33484.50       818.37 o
  -2   2  11        278.24        467.44        39.15 o
  -1   2  11      22322.23      19514.60       470.91 o
   0   2  11      13546.78       5542.67       172.04 o
   1   2  11      18117.75      16002.68       433.17 o
   2   2  11        533.99        563.73        40.79 o
   3   2  11      25950.65      33082.69       658.92 o
   4   2  11      26127.59      23006.57       323.49 o
   5   2  11      66935.29      65822.60      1501.24 o
   6   2  11       7711.88       7053.91       270.23 o
   7   2  11       2269.32       3485.12       333.62 o
   8   2  11      14844.81      14006.25       441.01 o
   9   2  11        512.53        745.16       137.33 o
  10   2  11        241.14        301.66        91.47 o
  11   2  11       1292.05       1756.03       190.58 o
  12   2  11         55.44        -52.29        77.85 o
  13   2  11        700.33        813.84       323.72 o
  14   2  11       1200.57       1280.37       190.48 o
  15   2  11        704.92       1046.68       173.30 o
  16   2  11        872.70        267.38       110.91 o
  17   2  11        138.12        297.42       132.86 o
 -16   3  11        469.39        290.06       114.27 o
 -15   3  11        432.83        591.40       140.43 o
 -14   3  11        322.72        423.07       124.29 o
 -13   3  11       1713.89       1360.73       195.45 o
 -12   3  11       1656.49       1686.23       195.95 o
 -11   3  11        879.75        767.78       136.54 o
 -10   3  11       4369.01       4562.25       282.44 o
  -9   3  11       7161.98       7495.62       339.69 o
  -8   3  11       5720.34       6108.88       301.96 o
  -7   3  11       3167.37       3728.93       230.73 o
  -6   3  11      20206.80      17743.34       637.99 o
  -5   3  11       5133.83       6541.48       213.47 o
  -4   3  11      25530.47      23042.44       374.83 o
  -3   3  11       4077.57       5255.46       154.58 o
  -2   3  11      32238.79      26552.80       402.09 o
  -1   3  11      18481.94      20363.48       316.33 o
   0   3  11       2876.03       3156.96       131.16 o
   1   3  11      19764.83      20613.43       301.93 o
   2   3  11      40293.04      32990.21       761.57 o
   3   3  11       3123.21       4416.69       140.77 o
   4   3  11      27064.50      24596.01       650.63 o
   5   3  11       6091.13       7407.64       516.19 o
   6   3  11      20498.93      17553.96       632.87 o
   7   3  11       2935.12       3507.04       223.54 o
   8   3  11       5603.10       5899.98       441.87 o
   9   3  11       6330.05       6248.94       314.34 o
  10   3  11       4301.73       4887.59       296.15 o
  11   3  11        885.40        788.28       142.54 o
  12   3  11       2124.86       1865.01       207.99 o
  13   3  11       1746.42       1713.29       218.05 o
  14   3  11        333.90        410.80       132.71 o
  15   3  11        637.03        688.81       141.14 o
  16   3  11        539.95        492.17       139.29 o
 -16   4  11       1126.05        906.10       181.96 o
 -15   4  11        386.51        340.54       125.85 o
 -14   4  11        400.75        453.62       141.24 o
 -13   4  11        785.53        813.50       157.01 o
 -12   4  11       2267.81       3047.40       261.68 o
 -11   4  11       6294.19       6013.21       342.51 o
 -10   4  11       4813.27       5110.78       308.46 o
  -9   4  11       6873.66       7195.72       491.94 o
  -8   4  11      21356.21      19532.49       780.11 o
  -7   4  11       3840.56       4286.39       358.24 o
  -6   4  11      27315.17      27326.93       834.94 o
  -5   4  11        529.03        409.21        70.29 o
  -4   4  11       6070.83       6249.17       161.58 o
  -3   4  11      15078.42      15996.30       407.40 o
  -2   4  11      38090.16      45601.46      1098.29 o
  -1   4  11      20721.75      24742.61       514.28 o
   0   4  11       2626.37       5025.82       256.61 o
   1   4  11      22804.25      26328.81       450.40 o
   2   4  11      39030.88      47094.86       846.89 o
   3   4  11      12375.94      13354.15       289.38 o
   4   4  11       5664.44       5317.83       198.88 o
   5   4  11        588.32        455.13        71.38 o
   6   4  11      26422.37      25822.50       811.05 o
   7   4  11       4113.04       4975.12       378.57 o
   8   4  11      23946.74      22228.72       833.60 o
   9   4  11       6410.67       6306.69       466.61 o
  10   4  11       4829.20       4859.85       396.38 o
  11   4  11       5955.13       6210.34       352.42 o
  12   4  11       2531.04       3109.79       449.92 o
  13   4  11        684.23        671.88       202.27 o
  14   4  11        395.14        438.13       133.41 o
  15   4  11        517.73        446.32       132.42 o
  16   4  11       1148.87       1232.30       199.00 o
 -16   5  11       1139.27       1463.68       322.58 o
 -15   5  11        148.73        461.03       201.78 o
 -14   5  11        268.18        272.55       147.13 o
 -13   5  11       3021.90       4017.15       441.56 o
 -12   5  11        112.34        -55.87       110.94 o
 -11   5  11       6404.34       4961.31       468.12 o
 -10   5  11        929.83       1187.10       230.10 o
  -9   5  11       2041.57       1484.59       237.63 o
  -8   5  11      10955.54       8933.66       543.15 o
  -7   5  11       7457.60       6093.04       437.19 o
  -6   5  11       2950.91       3249.99       319.15 o
  -5   5  11       6984.81       6192.36       406.74 o
  -4   5  11      12205.44      12585.28       409.32 o
  -3   5  11       3741.18       3577.00       225.43 o
  -2   5  11      34712.47      39953.51       541.67 o
  -1   5  11       4193.42       6255.87       221.57 o
   0   5  11       3242.77       4148.46       181.90 o
   1   5  11       4983.52       7705.57       462.74 o
   2   5  11      42621.07      49588.29       946.64 o
   3   5  11       3329.46       3577.93       191.59 o
   4   5  11      10080.51      11227.43       328.45 o
   5   5  11       8221.53       7734.53       456.24 o
   6   5  11       3071.62       3646.37       339.38 o
   7   5  11       6909.70       5432.87       410.96 o
   8   5  11       9857.71       8394.16       535.18 o
   9   5  11       2581.41       1790.89       264.77 o
  10   5  11       1262.15       1625.29       262.36 o
  11   5  11       5889.57       5348.52       483.66 o
  12   5  11         28.49        122.18       129.82 o
  13   5  11       3093.30       3675.71       427.08 o
  14   5  11        250.76        229.93       157.98 o
  15   5  11        181.86        420.45       198.97 o
  16   5  11       1107.50       1698.14       333.84 o
 -16   6  11        250.03        157.98       164.81 o
 -15   6  11        481.04        897.36       252.48 o
 -14   6  11        748.94       1316.17       283.10 o
 -13   6  11       3942.22       3724.33       442.66 o
 -12   6  11        191.12        203.40       108.53 o
 -11   6  11       1663.26       1922.33       308.31 o
 -10   6  11        723.53        524.04       167.31 o
  -9   6  11        191.50       1344.23       259.68 o
  -8   6  11       9290.90       9436.02       575.59 o
  -7   6  11        591.44        452.05       162.48 o
  -6   6  11       1291.59        857.43       182.36 o
  -5   6  11      20632.02      20456.28       787.70 o
  -4   6  11      61301.44      66811.10      1406.42 o
  -3   6  11       8743.19      10054.93       590.23 o
  -2   6  11      34154.55      38235.53       890.88 o
  -1   6  11        776.33        793.75       159.78 o
   0   6  11      86409.80      98423.01      1009.65 o
   1   6  11       1483.11        936.05       256.43 o
   2   6  11      33950.52      37665.82       657.58 o
   3   6  11       7611.63       9250.00       688.47 o
   4   6  11      64131.65      67607.60      1069.85 o
   5   6  11      20040.70      18477.14      1207.48 o
   6   6  11        855.76        499.70       142.02 o
   7   6  11       1103.41        642.66       173.04 o
   8   6  11       9405.64       7948.07       533.85 o
   9   6  11        430.51       1368.68       267.38 o
  10   6  11        845.00        734.06       188.24 o
  11   6  11       1806.18       2016.76       316.00 o
  12   6  11        390.64        250.07       147.15 o
  13   6  11       4208.13       4292.47       476.22 o
  14   6  11        473.73        694.34       219.12 o
  15   6  11        527.31        904.62       242.44 o
  16   6  11        302.83        286.21       172.45 o
 -15   7  11        917.72        814.38       248.13 o
 -14   7  11       1838.23       1190.84       272.86 o
 -13   7  11        140.26        -22.11       131.04 o
 -12   7  11        178.55        399.15       207.01 o
 -11   7  11        112.13         56.27        98.48 o
 -10   7  11        586.37        415.39       182.96 o
  -9   7  11        213.40        241.59       140.29 o
  -8   7  11       2962.74       2411.52       322.50 o
  -7   7  11        603.41       1038.40       223.20 o
  -6   7  11       8345.49       5396.37       446.38 o
  -5   7  11      16605.48      14706.76       711.94 o
  -4   7  11      60972.88      68023.50      1541.09 o
  -3   7  11      11886.69      16445.86       766.23 o
  -2   7  11       8242.46       9177.20       228.46 o
  -1   7  11       4367.42       5676.57       282.81 o
   0   7  11      82765.52      97814.62      1339.22 o
   1   7  11       4089.16       5102.52       327.18 o
   2   7  11       5743.76       6532.23       462.33 o
   3   7  11      10110.80      12070.47      1192.05 o
   4   7  11      66024.24      69220.77      1150.02 o
   5   7  11      17529.19      15383.12       718.06 o
   6   7  11       9150.34       6508.59       477.66 o
   7   7  11        334.16        720.88       207.86 o
   8   7  11       2886.75       2522.59       322.88 o
   9   7  11        329.22        173.28       131.87 o
  10   7  11        871.89        970.97       251.39 o
  11   7  11        226.60        247.22       154.76 o
  12   7  11        106.56        480.72       207.80 o
  13   7  11         49.83        -63.91       144.29 o
  14   7  11       1850.95       1495.50       303.85 o
  15   7  11        943.13        832.49       251.36 o
 -15   8  11        398.18        427.34       210.25 o
 -14   8  11        247.61        364.59       177.27 o
 -13   8  11       2371.43       3129.97       424.36 o
 -12   8  11        296.79        468.33       189.34 o
 -11   8  11        284.63        208.24       155.17 o
 -10   8  11       2993.21       3040.72       380.39 o
  -9   8  11        301.31        400.41       181.71 o
  -8   8  11       1906.94       2562.50       344.67 o
  -7   8  11       3160.77       2768.50       345.96 o
  -6   8  11       3367.77       3361.40       386.04 o
  -5   8  11       2959.42       2559.58       327.86 o
  -4   8  11      13418.39      13761.12       737.12 o
  -3   8  11       2370.00       2903.22       155.56 o
  -2   8  11       5010.47       5474.67       190.25 o
  -1   8  11       2089.77       2333.32       198.77 o
   0   8  11       1366.26       1951.21       166.07 o
   1   8  11       2065.17       2017.77       200.56 o
   2   8  11       3737.36       4241.68       412.33 o
   3   8  11       2779.78       3092.99       358.54 o
   4   8  11      10491.82      10874.38       638.14 o
   5   8  11       2428.22       1841.44       274.87 o
   6   8  11       3592.54       2981.73       363.94 o
   7   8  11       2826.08       2252.41       306.74 o
   8   8  11       1833.35       2270.41       327.74 o
   9   8  11        372.69        212.28       158.00 o
  10   8  11       2768.18       2174.34       333.99 o
  11   8  11        147.57         75.17       106.12 o
  12   8  11        389.53        877.23       250.06 o
  13   8  11       1940.40       1807.18       338.90 o
  14   8  11        169.32        256.04       168.42 o
  15   8  11        472.25        531.09       227.15 o
 -14   9  11        376.95       1076.18       279.40 o
 -13   9  11       2075.39       2310.43       383.60 o
 -12   9  11        285.86        658.46       202.60 o
 -11   9  11       2705.10       3084.86       414.86 o
 -10   9  11        929.96        822.54       232.48 o
  -9   9  11       2595.05       2246.97       347.64 o
  -8   9  11        582.00        685.22       208.70 o
  -7   9  11       1312.85        910.68       222.94 o
  -6   9  11       6383.34       6363.28       555.42 o
  -5   9  11       1120.75       1097.72       224.53 o
  -4   9  11       3869.81       3006.49       309.79 o
  -3   9  11       1456.90       1853.57       139.43 o
  -2   9  11        154.28         50.60        63.75 o
  -1   9  11       5076.15       4148.37       166.43 o
   0   9  11       3265.38       4314.90       239.05 o
   1   9  11       4984.48       4309.56       310.28 o
   2   9  11         70.33        100.48        99.68 o
   3   9  11       1520.51       1792.02       303.17 o
   4   9  11       3289.89       2563.89       325.93 o
   5   9  11        562.87        678.83       191.82 o
   6   9  11       6516.47       6919.24       555.50 o
   7   9  11       1776.10       1493.25       281.42 o
   8   9  11        699.11        667.19       201.89 o
   9   9  11       3122.50       2684.08       368.76 o
  10   9  11        919.61        854.31       231.68 o
  11   9  11       2844.58       3222.97       437.46 o
  12   9  11        462.90        718.46       226.35 o
  13   9  11       2335.71       2626.90       399.77 o
  14   9  11        281.86        892.40       258.48 o
 -14  10  11        535.55        501.76       232.39 o
 -13  10  11       1217.20       1189.86       279.97 o
 -12  10  11        936.47       1295.84       294.80 o
 -11  10  11        285.38        428.52       184.92 o
 -10  10  11        727.78        839.27       254.56 o
  -9  10  11       3548.81       3140.64       419.24 o
  -8  10  11       1170.80       1304.73       278.81 o
  -7  10  11       1439.60       1084.58       251.52 o
  -6  10  11        398.20        360.65       163.24 o
  -5  10  11        229.64        812.85       211.65 o
  -4  10  11       1750.37       1716.26       204.94 o
  -3  10  11       1424.16       2208.83       170.16 o
  -2  10  11        440.31        502.12       104.74 o
  -1  10  11       5620.37       5653.46       275.32 o
   0  10  11       4247.97       4084.96       246.50 o
   1  10  11       5592.41       5224.37       308.08 o
   2  10  11        893.59        951.03       234.14 o
   3  10  11       1570.64       2552.76       369.17 o
   4  10  11       1650.08       2142.20       355.89 o
   5  10  11        257.47        603.01       200.20 o
   6  10  11        354.35        392.80       181.72 o
   7  10  11       1480.98       1123.66       257.17 o
   8  10  11        965.72        794.44       229.28 o
   9  10  11       3385.54       2735.14       397.82 o
  10  10  11        595.08        601.94       212.71 o
  11  10  11        364.63        201.81       143.92 o
  12  10  11       1024.70       1285.06       287.98 o
  13  10  11       1326.04       1236.22       290.85 o
  14  10  11        549.69        367.48       188.56 o
 -13  11  11        166.52        223.08       186.10 o
 -12  11  11        258.91        420.87       209.03 o
 -11  11  11        497.54        542.37       219.52 o
 -10  11  11       4313.72       4018.40       498.82 o
  -9  11  11        122.08         60.69       131.03 o
  -8  11  11       1161.04       1600.74       301.32 o
  -7  11  11        580.43        997.23       261.77 o
  -6  11  11       2453.45       2316.91       362.52 o
  -5  11  11          0.60        -81.96        81.96 o
  -4  11  11        791.65        857.83       134.92 o
  -3  11  11       3012.77       3225.31       293.01 o
  -2  11  11       7033.88       6453.96       304.55 o
  -1  11  11       3659.37       2941.77       244.52 o
   0  11  11      11878.50      11042.21       410.37 o
   1  11  11       3273.91       2734.85       238.66 o
   2  11  11       6155.22       5453.17       451.29 o
   3  11  11       2350.69       2107.27       363.36 o
   4  11  11       1020.35       1207.31       294.89 o
   5  11  11          6.84         94.85       129.01 o
   6  11  11       2235.96       2135.63       345.94 o
   7  11  11        658.79        986.84       263.40 o
   8  11  11       1562.99       1776.34       325.97 o
   9  11  11        179.12         90.44       143.50 o
  10  11  11       4340.38       3697.49       476.25 o
  11  11  11        532.61        427.39       177.31 o
  12  11  11        187.15        257.25       162.39 o
  13  11  11        167.63        376.63       204.19 o
 -12  12  11         70.21        -63.10       151.53 o
 -11  12  11       1745.09       2475.22       413.68 o
 -10  12  11       1105.34       1695.43       350.75 o
  -9  12  11        344.52        606.23       215.88 o
  -8  12  11       1223.63       1809.95       346.78 o
  -7  12  11        818.78       1366.20       300.43 o
  -6  12  11       5794.62       5495.08       558.19 o
  -5  12  11       1317.62       1136.30       267.58 o
  -4  12  11       1709.31       1604.88       340.14 o
  -3  12  11       2492.12       2674.06       284.52 o
  -2  12  11       1598.77       1723.60       132.19 o
  -1  12  11        200.78        355.15       134.08 o
   0  12  11        972.38        851.88       130.04 o
   1  12  11        268.09        554.85       128.52 o
   2  12  11       1953.31       1961.46       210.43 o
   3  12  11       2498.68       2197.47       371.01 o
   4  12  11       1777.08       1609.81       344.18 o
   5  12  11       1285.57       1261.81       292.92 o
   6  12  11       5419.83       4807.32       511.98 o
   7  12  11        916.64       1179.68       294.42 o
   8  12  11       1064.21       1090.49       286.80 o
   9  12  11        491.94        362.66       201.83 o
  10  12  11       1131.94       1521.29       333.46 o
  11  12  11       1768.42       2223.35       395.17 o
  12  12  11        159.42        -33.76       130.23 o
 -11  13  11        180.19        291.82       191.73 o
 -10  13  11        261.23         -6.03       139.49 o
  -9  13  11        127.63        468.26       212.63 o
  -8  13  11        318.25        296.28       187.33 o
  -7  13  11        195.95        711.48       247.21 o
  -6  13  11         56.41        369.77       209.80 o
  -5  13  11         55.99        -23.71       151.12 o
  -4  13  11       2208.17       3297.40       474.34 o
  -3  13  11       2505.38       3084.23       311.25 o
  -2  13  11       4473.39       4352.39       268.82 o
  -1  13  11       3741.97       3941.67       262.29 o
   0  13  11       8419.45       9023.54       397.81 o
   1  13  11       3896.13       4117.98       272.75 o
   2  13  11       4649.31       3975.08       300.91 o
   3  13  11       2626.30       1855.19       255.85 o
   4  13  11       2113.77       2964.96       452.15 o
   5  13  11         68.29         83.60       131.43 o
   6  13  11         50.24        110.93       149.11 o
   7  13  11        266.54        952.31       249.64 o
   8  13  11        234.72         37.79       147.53 o
   9  13  11         88.63        211.01       166.40 o
  10  13  11        169.53        132.64       174.05 o
  11  13  11        166.52        281.37       194.14 o
 -10  14  11        475.41        435.41       217.90 o
  -9  14  11       1107.58       1361.52       332.24 o
  -8  14  11        813.83        998.12       284.32 o
  -7  14  11       1602.17       2043.34       388.71 o
  -6  14  11         44.79        -38.58       132.63 o
  -5  14  11       1026.15       1023.27       268.29 o
  -4  14  11        443.68        779.17       277.01 o
  -3  14  11       1389.69       1414.52       194.65 o
  -2  14  11        805.71        748.59       125.27 o
  -1  14  11        268.58        491.64       111.36 o
   0  14  11        366.07        236.46       162.88 o
   1  14  11        343.56        278.02        93.11 o
   2  14  11        934.68        747.81       140.86 o
   3  14  11       1476.83       1337.82       190.75 o
   4  14  11        404.10        628.78       252.08 o
   5  14  11       1030.54        999.95       268.69 o
   6  14  11         96.01        314.71       194.54 o
   7  14  11       1922.60       2003.18       379.14 o
   8  14  11        641.80        793.73       264.98 o
   9  14  11        937.15        788.26       256.18 o
  10  14  11        518.08        560.46       238.41 o
  -9  15  11        217.27         27.74       150.74 o
  -8  15  11        155.23        362.16       213.84 o
  -7  15  11        202.26        302.68       199.37 o
  -6  15  11        258.84        549.51       232.35 o
  -5  15  11        702.18        840.02       260.17 o
  -4  15  11        422.67        362.13       336.90 o
  -3  15  11        476.71        949.05       211.37 o
  -2  15  11       4203.01       4356.67       277.05 o
  -1  15  11        135.37         -8.19        87.87 o
   0  15  11       2394.18       2200.79       207.71 o
   1  15  11        157.44         72.59        98.87 o
   2  15  11       4054.38       4047.87       505.55 o
   3  15  11        216.89        154.28       116.89 o
   4  15  11        665.24        664.86       140.89 o
   5  15  11        788.17        871.04       263.00 o
   6  15  11        359.50        396.38       194.98 o
   7  15  11        137.42        198.16       171.63 o
   8  15  11        149.83        609.35       247.60 o
   9  15  11        266.68        276.16       196.97 o
  -8  16  11        176.39        346.88       222.68 o
  -7  16  11        742.17       1412.21       366.32 o
  -6  16  11       1446.82       1763.34       396.68 o
  -5  16  11        740.05        436.30       198.65 o
  -4  16  11        457.02        561.93       370.48 o
  -3  16  11        403.28        484.08       294.68 o
  -2  16  11         13.03         13.25        77.40 o
  -1  16  11         63.61        286.96        99.64 o
   0  16  11        239.31        333.28       149.98 o
   1  16  11         55.73         75.69       131.40 o
   2  16  11         18.29         -8.09        83.08 o
   3  16  11        346.45        425.23       122.33 o
   4  16  11        559.62        451.55       154.67 o
   5  16  11        884.65        505.87       165.04 o
   6  16  11       1309.39       1492.44       366.47 o
   7  16  11        909.86       1636.37       395.72 o
   8  16  11        206.63        272.93       222.69 o
  -5  17  11        445.35        313.31       283.43 o
  -4  17  11        515.34        483.58       224.34 o
  -3  17  11        240.15        280.72       167.42 o
  -2  17  11        143.19        426.03       172.29 o
  -1  17  11         93.95        174.52       116.14 o
   0  17  11        314.29        323.48       104.45 o
   1  17  11        134.48        127.69       110.87 o
   2  17  11        148.76        205.29       106.47 o
   3  17  11        256.70        402.33       127.43 o
   4  17  11        534.10        525.72       146.66 o
   5  17  11        334.39        246.29       126.33 o
  -1  18  11        558.97        435.99       256.31 o
   0  18  11       3145.00       3324.03       405.77 o
   1  18  11        574.01        509.92       179.81 o
   0   0  12      75086.23      87501.97      3922.86 o
   1   0  12      77261.77      94256.51       900.68 o
   2   0  12      18555.78      23944.54       498.88 o
   3   0  12       1208.16       1920.57        70.07 o
   4   0  12        491.42        379.96        45.96 o
   5   0  12      11885.20      14547.09       248.47 o
   6   0  12      24292.85      23775.12       354.04 o
   7   0  12       7259.55      10080.62       345.97 o
   8   0  12       3174.09       3102.92       220.23 o
   9   0  12      22191.29      21244.30       597.20 o
  10   0  12         20.84        478.73       131.63 o
  11   0  12       3523.49       2597.91       228.64 o
  12   0  12        658.36        419.01       114.46 o
  13   0  12        402.45        374.68       124.17 o
  14   0  12        129.05        309.37       109.86 o
  15   0  12       1157.74        950.07       176.00 o
  16   0  12       3004.23       2351.03       259.58 o
  17   0  12       1410.81       1333.14       225.53 o
 -17   1  12       1410.02       1092.10       196.34 o
 -16   1  12        267.74        388.94       125.42 o
 -15   1  12        678.09        643.11       141.60 o
 -14   1  12        317.04        418.14       129.88 o
 -13   1  12       1562.67       1458.34       198.60 o
 -12   1  12       2360.46       2502.48       230.35 o
 -11   1  12       4103.71       4969.72       300.57 o
 -10   1  12       1185.60        924.46       132.24 o
  -9   1  12        782.46        981.52       148.91 o
  -8   1  12       4584.23       5019.60       271.21 o
  -7   1  12      49542.72      57313.29      2191.56 o
  -6   1  12      43178.64      48103.59       721.83 o
  -5   1  12      24524.71      26063.74       355.17 o
  -4   1  12      14340.12      15822.46       271.00 o
  -3   1  12      25719.33      21604.71       305.91 o
  -2   1  12       1293.83        450.67        74.87 o
  -1   1  12      43015.48      34691.69       716.69 o
   0   1  12      18672.94      16345.50       572.72 o
   1   1  12      41237.93      35210.21       418.02 o
   2   1  12       1886.41        797.47        65.50 o
   3   1  12      21381.76      18089.80       222.92 o
   4   1  12      15370.75      16857.03       305.66 o
   5   1  12      27034.10      29333.80       362.67 o
   6   1  12      45994.07      51827.59       941.12 o
   7   1  12      41326.06      47712.14       755.12 o
   8   1  12       4347.69       4526.39       259.00 o
   9   1  12        992.38       1144.49       155.20 o
  10   1  12       1159.17        951.40       132.31 o
  11   1  12       4269.97       5117.80       305.01 o
  12   1  12       2216.74       2343.81       225.44 o
  13   1  12       1844.43       1938.26       220.99 o
  14   1  12        417.61        690.58       145.09 o
  15   1  12       1054.03       1241.41       195.68 o
  16   1  12        237.19        349.21       132.28 o
  17   1  12       1584.20       1427.82       223.90 o
 -16   2  12        390.35        471.56       135.02 o
 -15   2  12        891.74        944.93       171.67 o
 -14   2  12       1529.47       1482.85       206.75 o
 -13   2  12       3055.59       2119.38       223.73 o
 -12   2  12         75.66        127.69        90.75 o
 -11   2  12       6362.71       5392.89       513.53 o
 -10   2  12        934.82       1038.00       136.77 o
  -9   2  12      11665.44      10474.99       397.55 o
  -8   2  12       1560.18       1887.12       355.16 o
  -7   2  12       9177.99      11755.24       436.38 o
  -6   2  12      42020.20      36846.65       465.78 o
  -5   2  12      25083.96      28282.99       522.37 o
  -4   2  12      22583.27      26646.30       348.69 o
  -3   2  12      43209.86      33639.19       651.88 o
  -2   2  12      16694.87       9084.01       346.56 o
  -1   2  12      23011.58      23525.73       558.54 o
   0   2  12      11630.64      14384.86       283.90 o
   1   2  12      24229.26      24907.57       482.44 o
   2   2  12      17507.10       9660.36       325.16 o
   3   2  12      38366.65      30001.48       901.96 o
   4   2  12      23796.16      27906.42       332.28 o
   5   2  12      19328.18      22703.98       327.29 o
   6   2  12      40946.45      37818.57       466.62 o
   7   2  12      12336.93      15326.95       430.88 o
   8   2  12       1660.34       2091.87       178.06 o
   9   2  12      10295.79       9772.30       388.67 o
  10   2  12        866.31        994.23       138.14 o
  11   2  12       6700.77       5651.49       330.77 o
  12   2  12         87.18        158.02        91.92 o
  13   2  12       2724.56       1909.53       217.70 o
  14   2  12       1392.61       1220.94       192.12 o
  15   2  12       1090.93       1160.96       189.52 o
  16   2  12        533.68        658.27       154.49 o
 -16   3  12        484.23        647.33       157.43 o
 -15   3  12        231.14        371.63       115.92 o
 -14   3  12          7.97         25.46        81.88 o
 -13   3  12       2549.41       1804.20       209.56 o
 -12   3  12        644.68       1027.94       172.19 o
 -11   3  12        905.24        720.05       136.18 o
 -10   3  12       7615.98       6770.34       343.95 o
  -9   3  12       3623.55       3605.33       247.40 o
  -8   3  12       2855.30       2747.61       203.86 o
  -7   3  12      26538.13      32443.50      1082.50 o
  -6   3  12      13005.29      13809.74       569.08 o
  -5   3  12      87411.19      91301.68      1106.40 o
  -4   3  12      21586.30      21906.28       852.19 o
  -3   3  12     130965.95     131391.36      1083.08 o
  -2   3  12       2620.58       3133.79       136.26 o
  -1   3  12      29389.84      24918.54       734.42 o
   0   3  12       7158.57       4962.52       118.67 o
   1   3  12      32275.59      27899.50       913.98 o
   2   3  12       2699.48       3080.40       108.01 o
   3   3  12     134740.47     138140.47      1678.31 o
   4   3  12      22157.54      22834.57       881.33 o
   5   3  12      86427.16      87745.68      2031.52 o
   6   3  12      15212.17      15562.25       595.47 o
   7   3  12      27925.11      32611.86       954.63 o
   8   3  12       2916.99       2126.88       182.54 o
   9   3  12       2658.83       3151.98       239.69 o
  10   3  12       6889.14       6453.43       336.69 o
  11   3  12        830.22        623.39       132.66 o
  12   3  12        538.90        895.06       162.75 o
  13   3  12       2420.84       1709.80       205.92 o
  14   3  12         15.15        160.14       103.49 o
  15   3  12        363.26        629.32       147.11 o
  16   3  12        415.31        489.76       144.69 o
 -16   4  12        190.42        434.63       126.90 o
 -15   4  12        982.45       1086.26       185.08 o
 -14   4  12       1052.78       1271.00       189.30 o
 -13   4  12       7661.12       7505.14       418.99 o
 -12   4  12       1426.17       1409.19       189.13 o
 -11   4  12       2515.95       2466.57       226.25 o
 -10   4  12        811.12       1073.21       176.18 o
  -9   4  12        484.97        974.32       203.47 o
  -8   4  12       1224.20        847.21       192.79 o
  -7   4  12      12812.85      14362.56       635.82 o
  -6   4  12      40346.95      39613.44      1019.82 o
  -5   4  12       6279.54       5397.34       205.87 o
  -4   4  12       1401.59       2846.91       112.33 o
  -3   4  12       2656.64       2456.23       241.28 o
  -2   4  12      30932.25      32349.46      1041.57 o
  -1   4  12      12769.92      14254.34       305.46 o
   0   4  12      41594.88      36673.54       594.13 o
   1   4  12      11969.41      14155.95       376.44 o
   2   4  12      28526.43      29585.76       897.52 o
   3   4  12       2823.38       2380.29       125.80 o
   4   4  12       1148.82       2380.13       130.97 o
   5   4  12       6602.30       5442.04       207.20 o
   6   4  12      39588.87      37565.91       983.31 o
   7   4  12      10354.67      11230.75       560.62 o
   8   4  12       1189.53        672.11       174.27 o
   9   4  12        238.24        556.38       164.42 o
  10   4  12        949.32       1276.97       163.71 o
  11   4  12       2866.92       2648.14       241.73 o
  12   4  12       1342.60       1321.52       188.39 o
  13   4  12       7461.07       7947.81       434.85 o
  14   4  12        847.44        889.75       158.92 o
  15   4  12       1133.73       1436.16       212.74 o
  16   4  12        193.38        493.95       147.86 o
 -16   5  12        782.80        941.77       265.40 o
 -15   5  12         25.45         84.80       127.81 o
 -14   5  12        598.04        532.36       192.60 o
 -13   5  12       1358.20       1422.68       286.87 o
 -12   5  12        119.89        -10.45       106.92 o
 -11   5  12       1588.66       2098.54       312.33 o
 -10   5  12        564.23        772.88       201.06 o
  -9   5  12       1069.60        845.34       185.48 o
  -8   5  12        675.18        909.39       197.48 o
  -7   5  12       8455.66      11265.23       582.99 o
  -6   5  12       7399.72       5105.76       386.70 o
  -5   5  12        658.72        634.23        66.99 o
  -4   5  12      23327.78      20224.62       520.64 o
  -3   5  12      77373.71      79496.10      1051.12 o
  -2   5  12      12818.65      15322.09       336.16 o
  -1   5  12      45690.38      44068.53       721.07 o
   0   5  12      14520.12      15060.56       505.40 o
   1   5  12      40874.61      39434.40       922.50 o
   2   5  12      11469.27      14039.68       401.41 o
   3   5  12      81067.99      81566.16      1009.11 o
   4   5  12      23576.48      20657.68       456.51 o
   5   5  12        307.44        408.11       127.06 o
   6   5  12       6482.33       4269.72       350.58 o
   7   5  12       7169.17       8905.47       520.89 o
   8   5  12        704.78       1089.62       210.36 o
   9   5  12        811.91        688.64       184.23 o
  10   5  12        308.23        653.69       200.61 o
  11   5  12       1790.03       2913.70       354.25 o
  12   5  12        127.85        250.41       129.83 o
  13   5  12       1162.63       1520.21       301.31 o
  14   5  12        533.42        520.27       197.01 o
  15   5  12         20.39        102.49       133.43 o
  16   5  12        922.39       1005.80       270.65 o
 -16   6  12        692.13        813.84       253.32 o
 -15   6  12       1457.02       1485.77       316.63 o
 -14   6  12        739.36       1080.91       272.24 o
 -13   6  12        492.61        772.36       223.14 o
 -12   6  12       2046.07       2236.37       318.85 o
 -11   6  12       1689.87       1514.21       274.51 o
 -10   6  12        214.97         92.05       107.33 o
  -9   6  12       6454.03       7667.10       539.99 o
  -8   6  12       3102.27       2910.55       330.65 o
  -7   6  12       3568.41       3175.09       330.91 o
  -6   6  12         40.87        327.17       155.14 o
  -5   6  12       4655.66       5299.10       414.87 o
  -4   6  12      10252.49       9661.49       525.04 o
  -3   6  12       6094.01       5752.40       296.67 o
  -2   6  12      17195.74      17105.47       381.34 o
  -1   6  12       5030.39       7006.03       290.83 o
   0   6  12       3587.23       5379.11       241.74 o
   1   6  12       6369.87       7952.99       635.56 o
   2   6  12      16038.03      15707.45       423.02 o
   3   6  12       5203.48       5350.11       333.46 o
   4   6  12      10628.78      10152.14       407.63 o
   5   6  12       4313.02       4734.13       384.78 o
   6   6  12        212.48        597.39       189.35 o
   7   6  12       3475.05       3188.06       332.49 o
   8   6  12       2415.80       2193.61       296.56 o
   9   6  12       7761.20       8081.59       556.89 o
  10   6  12        304.92        192.17       117.39 o
  11   6  12       1339.31       1257.03       256.32 o
  12   6  12       2607.46       2495.99       358.47 o
  13   6  12        537.85        794.50       219.13 o
  14   6  12        485.35        505.38       212.28 o
  15   6  12       1206.57       1016.48       282.38 o
  16   6  12        609.97        604.31       216.72 o
 -15   7  12        349.24        209.85       155.57 o
 -14   7  12        233.72        209.83       153.15 o
 -13   7  12         23.31        336.40       175.64 o
 -12   7  12        250.63        810.40       244.41 o
 -11   7  12        971.62        808.50       209.57 o
 -10   7  12        687.56        802.70       205.90 o
  -9   7  12        143.81         92.45       109.33 o
  -8   7  12       1737.34       1583.89       271.36 o
  -7   7  12      12526.87      15565.33       763.34 o
  -6   7  12        531.06        490.22       156.03 o
  -5   7  12       4297.40       3619.14       365.63 o
  -4   7  12       2302.00       2840.23       347.07 o
  -3   7  12       5974.70       5233.26       439.58 o
  -2   7  12       6671.88       7422.49       311.79 o
  -1   7  12      35790.39      32335.07       675.84 o
   0   7  12       6657.25       7170.86       294.07 o
   1   7  12      38446.66      28484.63       811.67 o
   2   7  12       5305.84       5827.60       434.85 o
   3   7  12       6354.43       5178.35       435.75 o
   4   7  12       2759.74       2957.25       351.71 o
   5   7  12       4772.55       3528.25       363.01 o
   6   7  12        745.81        547.06       162.91 o
   7   7  12      15761.47      19131.77       837.47 o
   8   7  12       1901.84       1849.12       283.89 o
   9   7  12        155.09          3.62       101.30 o
  10   7  12        692.32        819.19       219.18 o
  11   7  12       1033.72        730.91       204.75 o
  12   7  12        477.32       1002.33       262.14 o
  13   7  12         46.28        117.36       137.86 o
  14   7  12        198.60        260.87       169.23 o
  15   7  12        357.25        434.57       207.03 o
 -15   8  12        427.12        295.08       184.93 o
 -14   8  12        797.37        907.61       244.90 o
 -13   8  12        916.04       1095.14       267.45 o
 -12   8  12        889.39       1217.01       267.45 o
 -11   8  12        510.33       1017.25       254.91 o
 -10   8  12       1711.31       1272.31       280.14 o
  -9   8  12       2479.45       1956.90       311.78 o
  -8   8  12       5514.68       4360.94       444.86 o
  -7   8  12       1394.70       1511.71       262.01 o
  -6   8  12       1941.77       2175.25       296.83 o
  -5   8  12        630.42        857.48       208.74 o
  -4   8  12       5407.75       6689.47       509.66 o
  -3   8  12       3058.27       3012.06       174.32 o
  -2   8  12       6967.86       7185.88       331.64 o
  -1   8  12        764.35        902.40       124.82 o
   0   8  12      48416.84      55265.66       823.95 o
   1   8  12        778.35        802.98       137.71 o
   2   8  12       7149.07       7553.69       529.67 o
   3   8  12       2389.26       2674.54       339.41 o
   4   8  12       5274.50       7128.44       513.62 o
   5   8  12        296.11        255.70       149.16 o
   6   8  12       1668.11       1875.45       278.62 o
   7   8  12       1317.76       1634.34       272.05 o
   8   8  12       4576.23       4030.42       426.70 o
   9   8  12       1437.86        988.38       246.29 o
  10   8  12       1513.42        993.61       257.16 o
  11   8  12        933.06       1377.99       280.75 o
  12   8  12        925.97       1017.56       243.33 o
  13   8  12        909.41       1010.27       266.24 o
  14   8  12        616.02       1005.20       261.75 o
  15   8  12        565.97        549.62       221.53 o
 -14   9  12        742.03        940.14       263.38 o
 -13   9  12         98.16         66.72       120.18 o
 -12   9  12          4.48         49.84       126.60 o
 -11   9  12        517.76        574.56       215.11 o
 -10   9  12        317.72         98.09       131.46 o
  -9   9  12        524.09        560.51       203.06 o
  -8   9  12        878.43        938.81       240.53 o
  -7   9  12       3413.64       3691.21       420.17 o
  -6   9  12      13155.08      16450.85       844.23 o
  -5   9  12        738.17        952.46       213.58 o
  -4   9  12        595.65        507.58        90.68 o
  -3   9  12       7055.01       8317.41       253.62 o
  -2   9  12         27.94        154.34        62.30 o
  -1   9  12      11988.07      12650.99       272.46 o
   0   9  12       6629.69       6509.27       299.72 o
   1   9  12      11674.08      11040.61       469.84 o
   2   9  12        142.96        -32.56        96.07 o
   3   9  12       8192.06       9361.27       640.53 o
   4   9  12        580.09        398.54       137.14 o
   5   9  12        384.79        439.46       155.60 o
   6   9  12      12213.14      14815.33       794.21 o
   7   9  12       3158.23       3538.72       409.18 o
   8   9  12        570.69        698.88       211.92 o
   9   9  12        470.94        454.34       197.42 o
  10   9  12        316.37        174.07       122.61 o
  11   9  12        594.74        643.35       219.14 o
  12   9  12         26.96         76.36       124.19 o
  13   9  12        162.78        163.19       160.78 o
  14   9  12        855.82       1294.90       311.26 o
 -14  10  12        681.18        843.59       266.59 o
 -13  10  12        416.66        709.97       236.39 o
 -12  10  12        627.44        904.30       267.39 o
 -11  10  12       1453.10       1310.07       284.06 o
 -10  10  12       6047.81       6538.06       609.83 o
  -9  10  12        441.48        297.92       181.33 o
  -8  10  12         23.57         78.37       137.45 o
  -7  10  12       4572.66       4339.80       467.36 o
  -6  10  12       1265.58       1242.58       265.98 o
  -5  10  12       4301.70       4904.24       285.66 o
  -4  10  12      10253.70       8366.43      1014.50 o
  -3  10  12       6755.78       6810.87       245.03 o
  -2  10  12       1276.46       1905.55       227.36 o
  -1  10  12        489.20        510.01        67.45 o
   0  10  12       1545.15       1524.65       155.21 o
   1  10  12        523.67        275.55       103.20 o
   2  10  12       1296.98       1474.32       230.82 o
   3  10  12       6995.09       7370.68       590.71 o
   4  10  12      11010.73       9937.34       690.94 o
   5  10  12       4037.19       4187.29       451.94 o
   6  10  12       1075.16       1142.18       259.09 o
   7  10  12       3980.85       3459.72       420.31 o
   8  10  12         52.07        157.55       148.31 o
   9  10  12        572.32        516.29       208.29 o
  10  10  12       5921.33       5917.13       576.25 o
  11  10  12       1019.19       1079.56       271.50 o
  12  10  12        755.47        546.90       226.80 o
  13  10  12        385.54        387.94       205.83 o
  14  10  12        702.67        977.90       286.29 o
 -13  11  12        107.85        426.45       221.47 o
 -12  11  12        327.59        472.75       217.08 o
 -11  11  12         18.71         95.25       138.26 o
 -10  11  12        655.37       1078.45       286.30 o
  -9  11  12        219.26         84.82       132.25 o
  -8  11  12       1087.74       1004.87       277.57 o
  -7  11  12       1169.68       1160.68       273.17 o
  -6  11  12        956.07        808.53       228.48 o
  -5  11  12       1671.56       2144.69       343.76 o
  -4  11  12      10083.80       9316.39       975.71 o
  -3  11  12       2604.13       2958.53       284.27 o
  -2  11  12       2216.83       2137.38       227.96 o
  -1  11  12       3462.49       3718.21       216.91 o
   0  11  12         94.52        133.75        82.85 o
   1  11  12       4308.01       4889.73       320.39 o
   2  11  12       2223.61       2026.21       210.70 o
   3  11  12       3663.18       4306.59       477.57 o
   4  11  12       9711.02       9895.60       745.97 o
   5  11  12       1481.87       2036.45       332.83 o
   6  11  12       1164.37        844.48       231.74 o
   7  11  12       1252.30       1102.02       247.84 o
   8  11  12        945.55        970.56       260.64 o
   9  11  12        225.26        243.20       179.28 o
  10  11  12        763.95        808.31       252.14 o
  11  11  12         33.13         18.89       127.00 o
  12  11  12        362.36        775.47       267.34 o
  13  11  12        158.37        307.49       192.13 o
 -12  12  12        232.10        349.31       189.33 o
 -11  12  12       1331.31       1687.20       354.01 o
 -10  12  12       1534.42       2235.53       389.49 o
  -9  12  12       1091.29       1180.58       296.05 o
  -8  12  12        950.96        993.06       263.45 o
  -7  12  12       2613.62       2369.51       382.23 o
  -6  12  12        643.33        935.34       287.52 o
  -5  12  12       2466.01       2017.10       350.01 o
  -4  12  12       1175.45       1241.19       291.69 o
  -3  12  12       1881.91       2274.18       260.51 o
  -2  12  12        355.63        339.73        73.49 o
  -1  12  12       1283.85       1358.56       109.63 o
   0  12  12        554.90        959.66       138.64 o
   1  12  12       1258.50       1167.61       148.41 o
   2  12  12        694.13        622.60       161.04 o
   3  12  12       1672.51       1949.02       359.45 o
   4  12  12       1312.40       1602.68       315.47 o
   5  12  12       2654.87       1971.10       346.85 o
   6  12  12        995.02       1042.22       272.72 o
   7  12  12       2688.64       2637.12       407.23 o
   8  12  12        884.11        969.68       271.08 o
   9  12  12       1028.76       1106.11       280.75 o
  10  12  12       1452.61       1744.94       352.45 o
  11  12  12       1269.84       1617.53       344.75 o
  12  12  12        271.30        398.76       194.16 o
 -11  13  12         43.31        284.16       193.72 o
 -10  13  12        102.26        254.42       196.55 o
  -9  13  12        245.46        471.12       204.61 o
  -8  13  12         34.32        140.27       131.43 o
  -7  13  12       2465.85       2764.02       440.94 o
  -6  13  12       1951.93       2138.29       381.20 o
  -5  13  12        375.40        521.43       211.47 o
  -4  13  12       2642.14       3083.07       465.64 o
  -3  13  12       2521.22       2392.24       225.55 o
  -2  13  12        262.43        306.19        86.61 o
  -1  13  12       2084.36       2838.95       221.61 o
   0  13  12       2418.88       3190.41       241.86 o
   1  13  12       2593.57       3525.61       251.78 o
   2  13  12        119.08          3.86        83.28 o
   3  13  12       2309.10       1730.28       206.41 o
   4  13  12       3302.02       3345.95       478.40 o
   5  13  12        415.67        457.12       189.36 o
   6  13  12       2003.02       2168.17       370.35 o
   7  13  12       2457.07       2809.51       428.05 o
   8  13  12         66.99         73.95       129.82 o
   9  13  12        359.14        460.30       203.82 o
  10  13  12        165.66        514.50       225.90 o
  11  13  12         51.37        447.34       226.68 o
 -10  14  12        478.27        474.00       218.31 o
  -9  14  12        274.55         89.64       148.33 o
  -8  14  12       1927.48       1741.49       375.91 o
  -7  14  12        854.77       1065.33       292.77 o
  -6  14  12       1324.88       1321.60       326.68 o
  -5  14  12       2478.56       2949.28       445.78 o
  -4  14  12        693.00        957.87       308.03 o
  -3  14  12        181.34        434.26       123.16 o
  -2  14  12        856.42        983.18       142.35 o
  -1  14  12       1741.97       2006.56       213.09 o
   0  14  12        599.48        718.45       123.67 o
   1  14  12       2197.74       2230.47       207.28 o
   2  14  12        824.88       1078.48       174.47 o
   3  14  12        314.37        255.58       130.17 o
   4  14  12        689.85        713.78       273.85 o
   5  14  12       2640.72       2680.23       430.93 o
   6  14  12       1148.60       1258.27       312.15 o
   7  14  12        978.59       1349.78       323.37 o
   8  14  12       2297.99       1916.68       383.26 o
   9  14  12        419.84        696.31       225.94 o
  10  14  12        516.84        528.69       221.53 o
  -9  15  12        528.77       1009.55       302.34 o
  -8  15  12        241.40        181.69       191.34 o
  -7  15  12        191.20        269.31       205.40 o
  -6  15  12        900.48        613.31       236.48 o
  -5  15  12        646.90        713.73       249.30 o
  -4  15  12        905.41        693.43       427.32 o
  -3  15  12        358.53       1027.98       205.05 o
  -2  15  12        316.47        474.97       114.73 o
  -1  15  12        452.20        391.29       136.31 o
   0  15  12        385.89        356.84       171.59 o
   1  15  12        437.55        202.49        88.79 o
   2  15  12        352.38        349.32       111.80 o
   3  15  12        376.36        469.97       164.88 o
   4  15  12        912.64        418.55       125.58 o
   5  15  12        483.36        388.38       211.48 o
   6  15  12        894.77        795.09       264.63 o
   7  15  12        225.52        550.30       246.81 o
   8  15  12        140.94        721.89       284.98 o
   9  15  12        596.26        819.41       295.92 o
  -7  16  12         81.39        153.54       165.19 o
  -6  16  12        308.71        391.14       226.72 o
  -5  16  12        249.98        285.00       200.18 o
  -4  16  12        547.88        616.71       190.67 o
  -3  16  12          6.49         59.10       250.19 o
  -2  16  12        693.23        741.61       134.42 o
  -1  16  12        935.02       1512.23       181.88 o
   0  16  12        139.51        247.11       140.86 o
   1  16  12       1063.76       1526.97       209.00 o
   2  16  12        522.87        614.57       130.29 o
   3  16  12         10.81        -34.06        92.03 o
   4  16  12        552.29        486.40       133.88 o
   5  16  12        279.32         99.85       113.77 o
   6  16  12        286.11        355.35       196.17 o
   7  16  12         79.81        309.89       215.43 o
  -5  17  12         84.88         40.97       133.64 o
  -4  17  12        709.79        925.78       391.24 o
  -3  17  12        270.28        202.80       185.11 o
  -2  17  12        244.28        341.90       165.57 o
  -1  17  12         88.17        145.40        99.94 o
   0  17  12        405.59        523.46       132.58 o
   1  17  12        112.97        -35.19       176.31 o
   2  17  12        167.81         94.22        87.73 o
   3  17  12        300.87        359.35       161.46 o
   4  17  12        795.26        605.02       168.30 o
   5  17  12         77.31         82.90        92.04 o
  -1  18  12        108.92        216.49       388.27 o
   0  18  12          1.04       -130.16       130.16 o
   1  18  12         71.67        202.79       159.54 o
   1   0  13        486.26        739.99        70.91 o
   2   0  13       2181.17       5044.50        84.57 o
   3   0  13       3763.51       2287.55        81.50 o
   4   0  13       7708.66       5861.94       142.16 o
   5   0  13        465.85        615.27        55.60 o
   6   0  13      34136.72      30188.04       398.53 o
   7   0  13        365.66        537.26       103.53 o
   8   0  13       4153.67       3991.25       244.54 o
   9   0  13       3072.98       3182.56       216.71 o
  10   0  13       1112.44       1537.92       164.45 o
  11   0  13       1011.86       1517.83       179.95 o
  12   0  13        956.83        856.02       140.50 o
  13   0  13       6813.90       6505.00       384.67 o
  14   0  13       2187.01       1749.83       211.43 o
  15   0  13        607.13        787.51       156.00 o
  16   0  13         48.78        246.15       118.94 o
 -16   1  13       1331.81        892.36       168.55 o
 -15   1  13        454.97        657.52       151.39 o
 -14   1  13       1218.44       1091.21       218.04 o
 -13   1  13        481.75        607.00       137.31 o
 -12   1  13       1873.89       2110.73       504.23 o
 -11   1  13        498.40        407.69       116.07 o
 -10   1  13        321.34        598.32       119.31 o
  -9   1  13       2174.53       1992.71       184.61 o
  -8   1  13       2010.64       1649.06       208.70 o
  -7   1  13      24045.72      22011.25       540.30 o
  -6   1  13       7957.05       8678.99       257.05 o
  -5   1  13       6633.65       6212.58       344.05 o
  -4   1  13      42855.01      42327.55       847.89 o
  -3   1  13       2131.01       4465.58       177.76 o
  -2   1  13      28476.29      24804.26       298.82 o
  -1   1  13      17205.26      19090.75       229.49 o
   0   1  13        633.23        765.50        78.33 o
   1   1  13      16623.97      18247.18       325.75 o
   2   1  13      21347.65      17855.58       407.71 o
   3   1  13       3651.22       6183.18       124.11 o
   4   1  13      34596.70      33829.82       884.12 o
   5   1  13       6884.51       6219.16       342.42 o
   6   1  13       9150.36       9777.23       301.25 o
   7   1  13      27379.14      26085.38       548.70 o
   8   1  13       1257.33        881.11       121.76 o
   9   1  13       2747.32       2394.21       199.77 o
  10   1  13        663.95        802.77       140.58 o
  11   1  13        340.13        268.25       100.92 o
  12   1  13       1818.61       2049.09       488.71 o
  13   1  13        428.40        552.29       131.83 o
  14   1  13       1223.32       1175.01       182.27 o
  15   1  13        558.89        640.93       149.16 o
  16   1  13       1466.61       1334.91       208.67 o
 -16   2  13        926.43        635.82       163.68 o
 -15   2  13       1154.86        986.28       180.05 o
 -14   2  13       1849.59       1989.16       222.47 o
 -13   2  13        332.05        463.64       123.18 o
 -12   2  13      10715.74       8806.57       422.85 o
 -11   2  13       2508.39       2359.62       218.99 o
 -10   2  13       1075.10        688.44       125.17 o
  -9   2  13       1571.23       1482.82       154.84 o
  -8   2  13       4044.75       4096.76       273.42 o
  -7   2  13       2933.57       2931.80       194.55 o
  -6   2  13       9876.65      10512.21       242.17 o
  -5   2  13       4884.43       5165.98       178.57 o
  -4   2  13      14954.36      12763.52       305.05 o
  -3   2  13        749.91        422.06        42.41 o
  -2   2  13      58614.45      64583.56       932.63 o
  -1   2  13      21253.91      14799.62       222.13 o
   0   2  13        341.06        375.62        37.52 o
   1   2  13      23641.13      16314.46       232.42 o
   2   2  13      59672.66      65369.12      1458.84 o
   3   2  13        361.70        697.54        53.36 o
   4   2  13      13983.70      11465.21       247.56 o
   5   2  13       5788.75       5915.91       214.03 o
   6   2  13       8505.31       9468.03       232.60 o
   7   2  13       2159.11       2541.09       185.39 o
   8   2  13       4345.95       4358.40       320.59 o
   9   2  13       1624.52       1648.20       163.04 o
  10   2  13       1080.22        682.28       122.02 o
  11   2  13       1962.70       1934.57       206.85 o
  12   2  13       9662.80       8288.15       415.59 o
  13   2  13        467.71        363.80       114.20 o
  14   2  13       1507.72       1900.49       221.07 o
  15   2  13        838.45        523.26       130.56 o
  16   2  13        824.35        630.16       161.77 o
 -16   3  13        901.51        677.61       148.07 o
 -15   3  13        116.82         24.10        84.49 o
 -14   3  13        914.68       1246.79       187.56 o
 -13   3  13       1720.73       1269.91       178.66 o
 -12   3  13       4634.57       3823.95       284.25 o
 -11   3  13       5333.86       4935.80       361.70 o
 -10   3  13        267.75        678.62       132.75 o
  -9   3  13       5206.69       5506.63       301.16 o
  -8   3  13       8056.76       8767.85       453.39 o
  -7   3  13       2629.39       2850.95       197.56 o
  -6   3  13       9840.23       9495.38       475.12 o
  -5   3  13       9412.66       8895.08       248.25 o
  -4   3  13      15139.70      14695.54       323.66 o
  -3   3  13       7130.57       7045.30       255.22 o
  -2   3  13      10807.71      14036.22       291.67 o
  -1   3  13       2486.87       3708.18       175.95 o
   0   3  13      30152.62      16789.87       345.63 o
   1   3  13       2072.10       3227.41       158.16 o
   2   3  13      13830.91      17232.92       495.82 o
   3   3  13       6209.57       6678.38       215.32 o
   4   3  13      16010.52      16060.94       284.52 o
   5   3  13       9626.79       9441.48       256.19 o
   6   3  13       7835.33       7296.35       426.26 o
   7   3  13       3034.17       3202.25       358.49 o
   8   3  13       6597.53       7504.57       332.08 o
   9   3  13       6352.00       6442.96       326.30 o
  10   3  13        381.69        666.51       135.73 o
  11   3  13       6314.07       6101.33       346.13 o
  12   3  13       4719.52       4269.45       303.66 o
  13   3  13       1585.61       1041.41       170.09 o
  14   3  13       1015.45       1763.54       221.26 o
  15   3  13        174.88         35.38        87.07 o
  16   3  13        814.23        743.10       160.07 o
 -16   4  13         75.91        -41.01       133.24 o
 -15   4  13        650.29        901.15       171.29 o
 -14   4  13       1026.44       1058.14       176.01 o
 -13   4  13       2534.39       3256.69       278.61 o
 -12   4  13       2876.94       2277.79       266.72 o
 -11   4  13       2636.80       2440.83       225.42 o
 -10   4  13        340.20        184.54       116.59 o
  -9   4  13       1270.30        937.70       188.75 o
  -8   4  13       2495.56       2579.14       290.60 o
  -7   4  13       8945.64       9408.29       507.53 o
  -6   4  13       1880.23       1841.77       231.28 o
  -5   4  13      24064.54      26029.62       562.82 o
  -4   4  13       2392.68       1994.42       194.20 o
  -3   4  13        869.06        974.13       105.58 o
  -2   4  13       1718.14        852.99       130.70 o
  -1   4  13       8466.03      10109.93       251.17 o
   0   4  13       3657.11       4820.57       179.90 o
   1   4  13      11039.34      12694.35       381.97 o
   2   4  13       2048.00        808.22        62.03 o
   3   4  13       1121.28        916.13        80.95 o
   4   4  13       2661.64       2567.00       236.41 o
   5   4  13      22262.55      25485.00       943.54 o
   6   4  13       1812.06       1889.55       230.86 o
   7   4  13       9222.06       9384.63       514.62 o
   8   4  13       2934.10       3161.52       326.64 o
   9   4  13       1273.74        891.02       191.16 o
  10   4  13        418.50        341.76       142.33 o
  11   4  13       2570.73       2590.09       237.14 o
  12   4  13       2994.08       2270.17       227.37 o
  13   4  13       2589.83       3237.13       330.05 o
  14   4  13       1060.49       1132.19       176.21 o
  15   4  13       1145.53       1322.58       201.41 o
  16   4  13         39.73         98.19       103.32 o
 -16   5  13        261.30        520.56       214.66 o
 -15   5  13        219.68        223.90       149.13 o
 -14   5  13        297.55        239.59       156.78 o
 -13   5  13       1986.52       1708.38       308.75 o
 -12   5  13        909.61        868.78       211.16 o
 -11   5  13       2083.03       1891.28       286.29 o
 -10   5  13       4742.22       5609.00       475.19 o
  -9   5  13        961.64       1134.09       225.29 o
  -8   5  13       1161.94       1367.42       230.18 o
  -7   5  13       8961.03       7502.25       486.58 o
  -6   5  13       6713.79       5491.68       399.68 o
  -5   5  13        332.11        532.93       100.72 o
  -4   5  13      23631.57      19013.92       605.58 o
  -3   5  13       1041.42       1214.94       162.44 o
  -2   5  13       3145.84       2714.03       249.82 o
  -1   5  13        815.82       1250.20       149.87 o
   0   5  13      45781.68      47456.00       635.85 o
   1   5  13        637.92       1061.54        91.13 o
   2   5  13       4181.17       3646.16       205.32 o
   3   5  13       1843.02       1618.68       132.22 o
   4   5  13      22006.17      18526.90       427.91 o
   5   5  13        786.08        710.53       156.11 o
   6   5  13       4904.83       3606.66       327.58 o
   7   5  13       7414.12       6874.90       462.19 o
   8   5  13       1289.11       1448.11       239.88 o
   9   5  13        528.32        742.32       183.37 o
  10   5  13       4470.56       4894.35       453.67 o
  11   5  13       2014.23       1764.73       286.27 o
  12   5  13        766.71        863.85       219.58 o
  13   5  13       2042.55       1760.79       324.06 o
  14   5  13        267.88        -24.92       131.05 o
  15   5  13        143.35        366.98       181.28 o
  16   5  13        182.72        328.00       204.19 o
 -16   6  13         25.94        333.99       192.52 o
 -15   6  13       1640.02       2017.48       353.68 o
 -14   6  13        553.60       1093.63       265.37 o
 -13   6  13        670.74        722.60       220.36 o
 -12   6  13       1556.35       1379.10       276.87 o
 -11   6  13       3735.63       3250.32       385.47 o
 -10   6  13        198.86        311.13       155.16 o
  -9   6  13       6265.17       7529.74       540.67 o
  -8   6  13       1727.04       2326.04       293.93 o
  -7   6  13        852.70       1025.04       202.76 o
  -6   6  13      29739.46      26217.06       915.86 o
  -5   6  13       3218.05       3117.59       324.88 o
  -4   6  13       5428.60       4283.75       361.97 o
  -3   6  13      22637.58      20618.04       554.51 o
  -2   6  13      13069.79      15191.59       362.78 o
  -1   6  13      18175.04      17172.34       464.16 o
   0   6  13      25099.65      21468.84       457.65 o
   1   6  13      17294.03      14971.21       456.92 o
   2   6  13      14096.72      15779.14       569.60 o
   3   6  13      21032.14      19059.85       457.26 o
   4   6  13       4677.81       3344.24       319.13 o
   5   6  13       2829.01       2583.59       292.44 o
   6   6  13      28767.32      25950.12       912.78 o
   7   6  13        735.24        857.97       189.86 o
   8   6  13       1937.07       1960.47       279.09 o
   9   6  13       7354.62       8560.75       574.85 o
  10   6  13        239.75        413.65       168.03 o
  11   6  13       4140.01       3025.18       383.59 o
  12   6  13       1551.54       1585.13       295.38 o
  13   6  13        597.84        745.48       239.24 o
  14   6  13        801.47       1194.37       273.06 o
  15   6  13       1740.69       2090.46       350.49 o
  16   6  13         24.73         99.67       160.76 o
 -15   7  13         68.86         77.97       141.08 o
 -14   7  13        841.24        955.51       254.16 o
 -13   7  13       3000.75       2851.59       397.18 o
 -12   7  13       4772.65       5945.95       552.72 o
 -11   7  13        404.61        527.88       183.33 o
 -10   7  13        792.31       1113.26       246.94 o
  -9   7  13       2914.83       2190.80       310.32 o
  -8   7  13        379.39        346.57       147.96 o
  -7   7  13      11777.02      11839.78       668.21 o
  -6   7  13       3945.27       4504.95       402.49 o
  -5   7  13       8207.08       9174.48       558.06 o
  -4   7  13      21736.22      23320.95       879.38 o
  -3   7  13      19871.70      21998.59      3247.35 o
  -2   7  13       6185.72       4449.73       243.86 o
  -1   7  13      23650.69      29222.58       560.78 o
   0   7  13       3764.00       4209.40       212.27 o
   1   7  13      25053.39      29559.18       602.05 o
   2   7  13       4923.72       3398.02       331.39 o
   3   7  13      19481.26      23169.75       891.97 o
   4   7  13      20903.14      22579.07       855.81 o
   5   7  13       9231.64       9383.48       563.20 o
   6   7  13       4013.36       4015.16       381.53 o
   7   7  13       9891.74       8834.89       579.57 o
   8   7  13        479.43        262.97       141.94 o
   9   7  13       3179.75       3012.51       358.37 o
  10   7  13       1285.47       1473.87       270.39 o
  11   7  13        363.19        537.51       196.19 o
  12   7  13       4543.82       5668.15       537.69 o
  13   7  13       2877.65       3032.58       416.88 o
  14   7  13        834.87        967.97       256.57 o
  15   7  13         52.14         88.02       144.29 o
 -15   8  13        757.49        996.03       274.24 o
 -14   8  13        935.19       1020.71       267.85 o
 -13   8  13        269.58        147.53       176.07 o
 -12   8  13        453.32        667.80       207.86 o
 -11   8  13       1193.09       1031.90       249.02 o
 -10   8  13       1368.54       1598.66       293.74 o
  -9   8  13       1143.12       1221.86       252.26 o
  -8   8  13       3082.08       3527.49       398.66 o
  -7   8  13        530.74        527.99       178.94 o
  -6   8  13       5057.74       4692.93       438.02 o
  -5   8  13       5289.04       5118.30       454.02 o
  -4   8  13       7008.03       8625.21       574.99 o
  -3   8  13      22766.71      20008.81      1133.99 o
  -2   8  13       1779.17       2511.24       198.54 o
  -1   8  13      26477.05      32081.68       615.59 o
   0   8  13       4675.46       5602.06       354.36 o
   1   8  13      25783.14      29419.56       608.34 o
   2   8  13       1682.07       2095.53       293.21 o
   3   8  13      23147.17      21025.98       876.65 o
   4   8  13       7566.99       8561.05       559.14 o
   5   8  13       6071.94       4873.09       433.77 o
   6   8  13       5366.42       5383.23       461.20 o
   7   8  13        694.45        713.48       205.12 o
   8   8  13       3104.01       3855.69       416.00 o
   9   8  13       1100.02       1228.25       243.80 o
  10   8  13       1403.20       1704.53       299.78 o
  11   8  13        860.89        826.90       222.81 o
  12   8  13        419.96        413.70       167.25 o
  13   8  13        154.88        176.86       168.42 o
  14   8  13        823.54        876.26       256.97 o
  15   8  13        820.06       1021.00       278.68 o
 -14   9  13        213.91        338.05       187.72 o
 -13   9  13        701.31        801.80       262.58 o
 -12   9  13        262.78        504.49       196.17 o
 -11   9  13        346.66        297.09       169.65 o
 -10   9  13        773.20        966.00       253.76 o
  -9   9  13        251.55        226.72       150.35 o
  -8   9  13       1297.02       1249.40       255.51 o
  -7   9  13       3378.94       4245.39       437.88 o
  -6   9  13        568.73       1207.21       254.15 o
  -5   9  13        159.94         55.87       108.93 o
  -4   9  13       2186.02       2077.25       164.03 o
  -3   9  13       4175.91       4837.04       265.72 o
  -2   9  13        138.63        213.87        79.75 o
  -1   9  13       3966.32       3836.27       166.92 o
   0   9  13       6831.82       5812.02       376.28 o
   1   9  13       3310.28       3036.07       204.13 o
   2   9  13        419.98        445.12       156.82 o
   3   9  13       5325.72       6234.93       518.74 o
   4   9  13       1833.06       1738.50       268.20 o
   5   9  13         86.37         34.16        99.28 o
   6   9  13        256.55        727.23       210.25 o
   7   9  13       3537.25       3871.39       415.77 o
   8   9  13       1404.97       1424.17       277.67 o
   9   9  13        135.44        190.12       155.15 o
  10   9  13        689.12        725.05       222.78 o
  11   9  13        345.67        601.41       221.11 o
  12   9  13        127.50        150.33       153.14 o
  13   9  13        643.37        801.37       244.07 o
  14   9  13        298.56        161.60       157.18 o
 -14  10  13         88.28        175.64       172.03 o
 -13  10  13         85.72        192.12       163.59 o
 -12  10  13       1914.90       2332.71       383.15 o
 -11  10  13        516.95        715.67       236.82 o
 -10  10  13       1309.71       1528.03       327.09 o
  -9  10  13         75.18        348.47       174.44 o
  -8  10  13       1555.54       1730.54       307.07 o
  -7  10  13       1029.34       1503.73       292.86 o
  -6  10  13       1063.53       1146.99       251.04 o
  -5  10  13       1915.50       2000.37       349.31 o
  -4  10  13       1112.34       1018.57       124.43 o
  -3  10  13       3166.89       2592.26       146.18 o
  -2  10  13       9587.76      10027.56       420.37 o
  -1  10  13       1549.18       1849.57       116.08 o
   0  10  13        312.44        128.07        80.04 o
   1  10  13       1579.44       1981.18       178.95 o
   2  10  13      11581.26      11925.90       572.85 o
   3  10  13       3285.63       2909.70       379.89 o
   4  10  13       1579.83       1687.09       303.12 o
   5  10  13       1694.43       2149.35       326.49 o
   6  10  13       1083.72       1006.20       237.77 o
   7  10  13        674.53        688.89       208.72 o
   8  10  13       1937.55       2870.43       386.48 o
   9  10  13        134.17        259.66       164.40 o
  10  10  13       1246.31       1445.48       316.61 o
  11  10  13        687.83        821.93       250.52 o
  12  10  13       1789.69       2217.00       365.01 o
  13  10  13        112.63        186.90       169.22 o
  14  10  13         71.77         91.24       142.28 o
 -13  11  13        105.28         40.19       149.12 o
 -12  11  13       2427.24       2519.46       406.62 o
 -11  11  13       2286.14       1940.86       345.01 o
 -10  11  13       1123.22        816.97       252.21 o
  -9  11  13         90.00        313.11       189.71 o
  -8  11  13       4542.73       5358.66       549.87 o
  -7  11  13        611.54        709.33       229.21 o
  -6  11  13        423.54        267.37       174.49 o
  -5  11  13       1141.42        811.10       222.49 o
  -4  11  13        484.45        725.37       236.83 o
  -3  11  13        471.52        461.05       116.59 o
  -2  11  13       2117.48       2261.07       140.35 o
  -1  11  13       5741.13       6246.90       208.96 o
   0  11  13       2129.07       2569.21       207.90 o
   1  11  13       6033.99       5771.68       304.66 o
   2  11  13       2348.19       2419.73       222.00 o
   3  11  13        444.03        364.28       172.09 o
   4  11  13        516.39        615.22       203.06 o
   5  11  13       1195.19       1190.15       265.55 o
   6  11  13        769.54        306.46       166.91 o
   7  11  13        579.27        336.96       167.68 o
   8  11  13       4959.82       5378.67       544.40 o
   9  11  13        178.09        209.02       156.77 o
  10  11  13       1151.85       1011.28       275.95 o
  11  11  13       2007.39       1748.47       338.50 o
  12  11  13       2437.80       2527.53       411.86 o
  13  11  13         82.91        130.22       156.75 o
 -12  12  13        389.99        469.15       211.06 o
 -11  12  13        659.66        722.96       250.50 o
 -10  12  13        140.62        526.15       240.36 o
  -9  12  13       2225.60       1810.45       357.10 o
  -8  12  13       1042.92        791.20       246.57 o
  -7  12  13       3284.31       3536.63       476.33 o
  -6  12  13        854.45        977.34       251.77 o
  -5  12  13       2159.05       2468.72       405.48 o
  -4  12  13       1223.13       1650.82       355.27 o
  -3  12  13        179.40        364.89       130.64 o
  -2  12  13       2796.94       2612.10       206.59 o
  -1  12  13         88.77        143.41       105.93 o
   0  12  13       1054.78       1150.33       155.50 o
   1  12  13        198.21         82.10        76.74 o
   2  12  13       1992.03       1486.51       203.08 o
   3  12  13        376.31        585.78       215.90 o
   4  12  13        871.14       1055.02       283.16 o
   5  12  13       2431.58       2301.75       379.40 o
   6  12  13        917.94        940.79       252.59 o
   7  12  13       3314.59       3862.74       490.05 o
   8  12  13        860.88        940.30       243.32 o
   9  12  13       2111.55       1573.99       333.72 o
  10  12  13        227.29        494.02       210.63 o
  11  12  13        741.14        610.41       227.20 o
  12  12  13        485.53        522.65       209.06 o
 -11  13  13        702.62       1007.66       281.87 o
 -10  13  13       2764.80       3375.00       494.91 o
  -9  13  13         53.80        -41.40       147.50 o
  -8  13  13        411.00        254.89       162.42 o
  -7  13  13         24.68        113.34       159.16 o
  -6  13  13        393.46        766.67       238.81 o
  -5  13  13       2608.60       2748.49       426.13 o
  -4  13  13        295.11        286.63       205.02 o
  -3  13  13        662.62        744.64       254.80 o
  -2  13  13       1332.81       1693.65       173.48 o
  -1  13  13       1884.46       1530.44       168.21 o
   0  13  13       2312.72       2357.29       253.74 o
   1  13  13       1405.38       1019.89       144.28 o
   2  13  13       1010.01       1107.23       164.55 o
   3  13  13        587.08        673.95       142.69 o
   4  13  13        323.17        708.75       268.95 o
   5  13  13       2275.00       1625.53       328.57 o
   6  13  13        460.30        697.96       230.38 o
   7  13  13         54.75        116.56       144.69 o
   8  13  13        445.78        274.59       139.91 o
   9  13  13         82.63        321.14       196.54 o
  10  13  13       2387.77       2741.22       426.74 o
  11  13  13        805.35       1078.10       304.81 o
 -10  14  13        414.54        768.26       259.30 o
  -9  14  13        651.31        603.54       242.86 o
  -8  14  13        485.94        652.92       238.41 o
  -7  14  13        172.78        221.08       184.10 o
  -6  14  13       3665.30       3355.63       497.74 o
  -5  14  13        541.39        808.97       282.26 o
  -4  14  13       1337.27       1322.47       341.18 o
  -3  14  13       1318.27       1870.83       214.65 o
  -2  14  13        884.59       1057.23       147.56 o
  -1  14  13       1286.15       1123.29       152.61 o
   0  14  13       1463.91       1724.26       181.62 o
   1  14  13       1454.72       1171.65       162.94 o
   2  14  13        937.05        827.16       161.03 o
   3  14  13       1243.87       1564.49       203.04 o
   4  14  13       1388.01       1504.79       351.65 o
   5  14  13        374.16        258.50       195.78 o
   6  14  13       3760.90       3355.47       489.31 o
   7  14  13        163.96        300.26       191.73 o
   8  14  13        464.55        432.19       206.25 o
   9  14  13        541.71        114.59       165.25 o
  10  14  13        461.72        721.65       254.49 o
  -9  15  13         14.90         -7.64       139.86 o
  -8  15  13        385.93        357.79       217.09 o
  -7  15  13        163.66        227.91       202.99 o
  -6  15  13        886.94        893.61       279.50 o
  -5  15  13        809.23        586.33       231.23 o
  -4  15  13        843.70        998.72       516.17 o
  -3  15  13        504.61        668.29       142.75 o
  -2  15  13        205.07        191.06        86.07 o
  -1  15  13        355.52        678.53       131.64 o
   0  15  13        207.30        173.83       112.62 o
   1  15  13        377.21        407.38       122.15 o
   2  15  13        117.31         -3.83        79.98 o
   3  15  13        633.09        667.69       141.10 o
   4  15  13        552.51        339.63       145.22 o
   5  15  13        798.49        727.48       273.06 o
   6  15  13       1040.32        637.90       245.35 o
   7  15  13        189.96        205.40       186.91 o
   8  15  13        351.33        273.36       227.13 o
   9  15  13         21.61          9.24       140.67 o
  -7  16  13        961.30        909.71       284.74 o
  -6  16  13        517.10        802.09       287.87 o
  -5  16  13       1627.69       1904.41       400.36 o
  -4  16  13       1642.45       1407.83       760.70 o
  -3  16  13        785.53       1039.30       748.98 o
  -2  16  13        209.09        284.25        96.62 o
  -1  16  13       1360.37       1237.60       172.84 o
   0  16  13        264.90        372.04       160.02 o
   1  16  13       1329.89       1175.67       167.69 o
   2  16  13        308.80        495.30       117.61 o
   3  16  13        859.73       1150.16       179.13 o
   4  16  13       1611.32       1175.45       229.45 o
   5  16  13       1466.17       1176.77       259.35 o
   6  16  13        437.74        450.67       234.38 o
   7  16  13       1011.53       1181.21       325.37 o
  -5  17  13          1.37       -123.57       123.57 o
  -4  17  13         73.39         50.30       135.45 o
  -3  17  13        580.29        388.00       229.98 o
  -2  17  13        197.21        220.22       405.98 o
  -1  17  13       1707.64       1693.77       229.85 o
   0  17  13       3468.61       3280.67       271.08 o
   1  17  13       1805.23       1440.43       205.67 o
   2  17  13        230.89        118.08       117.02 o
   3  17  13        624.64        584.12       184.68 o
   4  17  13         97.00        -86.73       115.98 o
   5  17  13          7.85        -43.41       131.01 o
   0   0  14       7715.08       8028.21       408.32 o
   1   0  14      27278.07      19559.39       353.03 o
   2   0  14       1220.96       2262.10        76.44 o
   3   0  14      27780.06      31890.26       496.66 o
   4   0  14        211.59        112.13        26.20 o
   5   0  14       1246.34        729.62        64.32 o
   6   0  14      15494.69      16766.42       409.40 o
   7   0  14      11212.49      15896.82       434.24 o
   8   0  14      23063.11      25039.60       578.96 o
   9   0  14        456.55        550.81       111.41 o
  10   0  14        697.13        974.49       140.60 o
  11   0  14       6269.40       5498.66       323.65 o
  12   0  14       2194.82       2655.93       231.63 o
  13   0  14       1980.71       2253.01       233.05 o
  14   0  14        113.90        140.68        91.03 o
  15   0  14         61.72        158.25       100.14 o
  16   0  14        582.80        614.79       180.53 o
 -16   1  14        468.64        562.59       144.13 o
 -15   1  14       1055.89       1016.10       176.22 o
 -14   1  14        732.22        938.68       169.24 o
 -13   1  14        412.53        360.67       109.43 o
 -12   1  14       8577.09       8449.19       408.03 o
 -11   1  14       3464.15       2515.13       217.86 o
 -10   1  14       1238.03       1381.55       159.92 o
  -9   1  14       7794.66       8084.09       348.19 o
  -8   1  14       8202.87       7977.27       324.13 o
  -7   1  14       1060.23       1711.45       269.86 o
  -6   1  14       8322.13      11013.77       301.73 o
  -5   1  14       2321.84       1591.09        97.82 o
  -4   1  14      38721.82      36185.47       360.37 o
  -3   1  14       6336.02       7216.72       241.21 o
  -2   1  14       5750.89       3478.46        85.44 o
  -1   1  14      27818.35      28550.67       466.41 o
   0   1  14        217.67        212.56        67.61 o
   1   1  14      26175.48      26550.09       316.10 o
   2   1  14       6330.86       3875.70        89.68 o
   3   1  14       5912.67       6970.43       130.64 o
   4   1  14      37260.70      34864.04       356.95 o
   5   1  14       2244.24       1757.92        89.85 o
   6   1  14       7912.27      10483.02       235.31 o
   7   1  14       1259.21       1684.36       264.69 o
   8   1  14       8590.36       8628.73       689.91 o
   9   1  14       8529.69       8656.45       359.74 o
  10   1  14       1834.78       2047.11       215.22 o
  11   1  14       3776.05       2723.30       226.47 o
  12   1  14       8390.60       8175.56       404.47 o
  13   1  14        301.96        349.43       114.95 o
  14   1  14        507.18        459.56       130.10 o
  15   1  14        800.04        931.25       175.97 o
  16   1  14        433.25        701.94       159.57 o
 -16   2  14       2901.62       2770.22       281.51 o
 -15   2  14        229.83        298.49       114.54 o
 -14   2  14         67.79        167.54       105.55 o
 -13   2  14       1428.84       1959.81       323.71 o
 -12   2  14       3285.32       4295.02       304.99 o
 -11   2  14       1962.69       1746.89       186.88 o
 -10   2  14       1255.06       1027.75       139.13 o
  -9   2  14        882.97       1119.02       138.19 o
  -8   2  14       9327.14       9488.82       499.21 o
  -7   2  14      10240.18       9426.51       338.97 o
  -6   2  14      17383.73      21406.52       388.72 o
  -5   2  14       1266.41       1258.95        77.87 o
  -4   2  14      35325.01      28852.16       814.52 o
  -3   2  14       2359.76       2280.64        91.57 o
  -2   2  14      25703.16      24632.06       585.56 o
  -1   2  14       9842.61      11091.26       268.79 o
   0   2  14       9306.96      14849.50       291.54 o
   1   2  14      10550.61      11025.23       231.32 o
   2   2  14      23103.27      23475.97       815.52 o
   3   2  14       2851.84       2577.29       191.37 o
   4   2  14      35442.44      29745.94       400.41 o
   5   2  14        923.44        944.84        69.87 o
   6   2  14      18610.97      22649.54       355.62 o
   7   2  14      11646.23      10986.69       474.68 o
   8   2  14       8340.36       8377.21       340.60 o
   9   2  14       1065.81       1399.08       153.48 o
  10   2  14       1378.25       1223.96       173.66 o
  11   2  14       2219.77       2013.36       203.76 o
  12   2  14       3108.19       3808.36       289.10 o
  13   2  14       1251.73       1560.70       193.29 o
  14   2  14        151.73        381.73       128.64 o
  15   2  14        230.76        254.95       107.37 o
  16   2  14       2937.85       3061.58       298.97 o
 -16   3  14        295.42        258.92       126.01 o
 -15   3  14         80.05        150.97        88.16 o
 -14   3  14       1585.40       1575.74       203.96 o
 -13   3  14         33.38         -1.28        70.67 o
 -12   3  14       2591.99       2112.58       233.43 o
 -11   3  14       2446.44       2352.31       211.48 o
 -10   3  14       3162.56       3587.92       253.68 o
  -9   3  14        539.18        425.84       126.27 o
  -8   3  14       2747.11       3270.34       320.94 o
  -7   3  14        838.40        707.61       102.84 o
  -6   3  14      21186.53      17166.38       632.31 o
  -5   3  14       2327.69       2324.74       132.36 o
  -4   3  14        877.38       1074.80        94.75 o
  -3   3  14      41371.34      54786.04       625.85 o
  -2   3  14       2980.29       2696.47       131.54 o
  -1   3  14      18354.30      25227.34       466.78 o
   0   3  14      11760.73       8354.60       163.70 o
   1   3  14      20244.30      27639.79       678.83 o
   2   3  14       3344.17       3039.86       107.66 o
   3   3  14      40269.70      54026.51      1340.30 o
   4   3  14        977.58       1187.64        92.65 o
   5   3  14       2715.95       2522.68       136.78 o
   6   3  14      22812.27      17342.98       626.62 o
   7   3  14        672.30        709.67       105.28 o
   8   3  14       3505.00       4218.59       460.44 o
   9   3  14        529.98        582.40       116.74 o
  10   3  14       3552.13       4083.99       273.50 o
  11   3  14       2274.79       2018.00       202.67 o
  12   3  14       3116.24       2780.62       371.36 o
  13   3  14         47.50         43.15        75.88 o
  14   3  14       1906.62       1864.39       296.04 o
  15   3  14         70.12        127.83        95.54 o
  16   3  14        306.63        273.90       116.49 o
 -16   4  14        275.37        317.98       117.18 o
 -15   4  14        738.74        591.62       145.31 o
 -14   4  14        196.99         74.14        91.74 o
 -13   4  14        519.06        860.85       164.56 o
 -12   4  14       1881.67       1604.02       197.67 o
 -11   4  14       1204.75        983.96       148.64 o
 -10   4  14        138.46        179.68       122.20 o
  -9   4  14       3425.44       3240.48       339.21 o
  -8   4  14      11946.77      13914.93       646.79 o
  -7   4  14      11230.75      10666.26       546.31 o
  -6   4  14       9448.31      10043.78       508.23 o
  -5   4  14       7310.60       8297.24       396.25 o
  -4   4  14      15515.79      15773.71       294.12 o
  -3   4  14      15218.30      13622.65       464.96 o
  -2   4  14       2081.77       2384.99       139.79 o
  -1   4  14      21648.12      19381.94       548.02 o
   0   4  14       1455.14        870.68        73.29 o
   1   4  14      19259.94      16747.71       318.58 o
   2   4  14       1710.09       2000.42        96.58 o
   3   4  14      13171.06      12260.02       391.65 o
   4   4  14      15358.39      14403.55       755.24 o
   5   4  14       5713.48       6794.25       235.21 o
   6   4  14      10049.40      10269.87       512.29 o
   7   4  14      11880.43      10962.35       549.99 o
   8   4  14      12329.31      14386.52       656.84 o
   9   4  14       3238.96       2853.92       313.34 o
  10   4  14        342.38        435.81       152.37 o
  11   4  14       1164.22        974.57       153.03 o
  12   4  14       2375.15       1857.75       216.28 o
  13   4  14        467.57        763.67       167.86 o
  14   4  14        285.40        138.12       157.38 o
  15   4  14        799.13        599.35       149.54 o
  16   4  14        236.21        424.24       131.71 o
 -16   5  14        258.68        517.34       211.44 o
 -15   5  14        983.02        942.73       242.12 o
 -14   5  14        565.22        372.72       168.07 o
 -13   5  14       3329.20       3243.05       401.75 o
 -12   5  14        894.47        883.24       222.42 o
 -11   5  14       1468.99       1998.87       293.77 o
 -10   5  14       7340.21       5956.34       478.35 o
  -9   5  14        231.28        303.11       139.49 o
  -8   5  14       1515.45       1338.94       227.45 o
  -7   5  14       7861.00       8636.56       515.50 o
  -6   5  14        158.87        117.09       144.92 o
  -5   5  14       2926.42       2474.11       176.93 o
  -4   5  14       3736.92       3546.36       217.64 o
  -3   5  14       8165.05       7496.39       306.29 o
  -2   5  14      23633.51      23690.18       525.64 o
  -1   5  14      17767.76      15717.07       460.42 o
   0   5  14        352.36        265.07        73.96 o
   1   5  14      17407.69      16080.99       443.30 o
   2   5  14      24806.32      25243.20       841.25 o
   3   5  14       7107.35       5423.61       333.91 o
   4   5  14       3054.79       3065.73       300.14 o
   5   5  14       2357.01       1890.94       235.46 o
   6   5  14        333.20        293.11       130.67 o
   7   5  14       7382.33       8229.69       500.62 o
   8   5  14       1079.21       1457.01       239.41 o
   9   5  14        383.47        249.28       133.08 o
  10   5  14       6719.81       5378.95       463.51 o
  11   5  14       1447.10       1699.43       281.70 o
  12   5  14        947.20        785.54       201.11 o
  13   5  14       3554.28       3843.75       436.89 o
  14   5  14        677.77        579.04       202.26 o
  15   5  14        885.06        908.07       248.94 o
  16   5  14        314.63        456.26       208.63 o
 -15   6  14        537.38       1040.52       256.11 o
 -14   6  14       1948.97       2158.51       357.00 o
 -13   6  14        872.13        746.04       227.23 o
 -12   6  14        581.04        795.35       235.23 o
 -11   6  14        960.94       1045.42       259.85 o
 -10   6  14       5687.03       5062.17       462.99 o
  -9   6  14       1697.02       1450.87       256.84 o
  -8   6  14       3877.20       4185.41       397.48 o
  -7   6  14       2785.66       2753.85       482.98 o
  -6   6  14      19092.35      20582.68       805.44 o
  -5   6  14      25199.55      22831.96       838.23 o
  -4   6  14       5707.09       6637.62       439.81 o
  -3   6  14      13861.66      15912.52       811.46 o
  -2   6  14       4051.34       4158.49       194.64 o
  -1   6  14       4928.41       6188.37       629.51 o
   0   6  14       1512.95       1174.35       116.96 o
   1   6  14       5100.10       6612.29       375.86 o
   2   6  14       4747.90       5012.67       275.92 o
   3   6  14      13607.38      14492.99       375.96 o
   4   6  14       4984.80       5463.21       393.67 o
   5   6  14      27601.35      23089.32       836.88 o
   6   6  14      18998.36      19254.93       777.82 o
   7   6  14       3412.57       3645.41       361.07 o
   8   6  14       2934.60       3220.24       349.11 o
   9   6  14       1833.72       1408.39       256.47 o
  10   6  14       5499.88       5408.29       471.39 o
  11   6  14       1059.83       1167.80       273.14 o
  12   6  14        822.71       1073.00       259.40 o
  13   6  14        649.48        667.50       213.12 o
  14   6  14       2233.11       2524.49       384.85 o
  15   6  14        467.69        736.53       223.93 o
 -15   7  14        276.99        221.89       174.86 o
 -14   7  14        529.14        940.82       267.77 o
 -13   7  14        212.79        311.12       172.44 o
 -12   7  14       1139.24       1422.02       288.03 o
 -11   7  14       1903.10       2422.54       342.57 o
 -10   7  14       1190.69       1185.67       246.63 o
  -9   7  14       4349.16       3987.06       412.43 o
  -8   7  14        201.03        279.17       133.06 o
  -7   7  14       5021.89       4069.06       400.80 o
  -6   7  14       5619.92       7341.66       517.27 o
  -5   7  14        132.30         98.88       106.12 o
  -4   7  14       7409.19       7527.22       498.89 o
  -3   7  14       3244.84       3778.52       281.46 o
  -2   7  14       9490.94       8985.57       347.43 o
  -1   7  14      16409.64      13938.47       778.36 o
   0   7  14      10041.89       8103.34       296.03 o
   1   7  14      16302.00      13676.97       450.91 o
   2   7  14       9858.99       9881.93       563.59 o
   3   7  14       2937.61       3485.33       347.36 o
   4   7  14       7467.68       6845.89       470.54 o
   5   7  14        331.34        282.65       131.47 o
   6   7  14       5977.56       7202.15       506.95 o
   7   7  14       4986.70       3683.07       384.63 o
   8   7  14        271.33        467.54       166.84 o
   9   7  14       4428.41       4164.12       416.49 o
  10   7  14        687.63        834.46       211.93 o
  11   7  14       2008.96       2493.20       354.27 o
  12   7  14        952.02       1116.94       257.82 o
  13   7  14        175.99        122.60       142.70 o
  14   7  14        500.71        532.72       220.32 o
  15   7  14        401.88        217.89       170.05 o
 -15   8  14        249.01        333.64       178.88 o
 -14   8  14       1686.43       1802.68       337.20 o
 -13   8  14        236.62        452.62       201.39 o
 -12   8  14         77.69         18.49       116.16 o
 -11   8  14       1126.05       1126.37       255.04 o
 -10   8  14        761.43        406.19       171.73 o
  -9   8  14       1368.44       2068.35       320.31 o
  -8   8  14       1048.20        996.51       251.04 o
  -7   8  14       2551.34       2068.66       302.20 o
  -6   8  14       9912.94      10413.52       655.44 o
  -5   8  14       2163.26       2521.15       316.65 o
  -4   8  14       1120.74       1334.85       243.07 o
  -3   8  14       3648.11       3447.79       443.64 o
  -2   8  14       3990.20       3534.71       226.82 o
  -1   8  14       9142.67       9632.63       342.69 o
   0   8  14       1692.37       1612.11       150.95 o
   1   8  14       9631.91       9839.74       361.11 o
   2   8  14       4221.52       4264.62       391.48 o
   3   8  14       3509.96       4411.33       411.27 o
   4   8  14        766.88       1013.30       217.22 o
   5   8  14       1369.71       1355.67       238.29 o
   6   8  14       8786.73       8683.15       586.12 o
   7   8  14       3208.27       2984.88       357.23 o
   8   8  14        985.84       1025.82       249.41 o
   9   8  14       1284.71       1745.89       300.57 o
  10   8  14        563.45        501.42       197.43 o
  11   8  14       1471.29       1424.85       285.29 o
  12   8  14        156.40        149.93       142.69 o
  13   8  14        176.67        440.95       189.72 o
  14   8  14       1485.36       1620.57       322.67 o
  15   8  14        329.40        260.49       191.35 o
 -14   9  14       1626.40       1073.49       289.29 o
 -13   9  14        192.37        270.12       168.02 o
 -12   9  14        223.48        157.57       141.09 o
 -11   9  14       1518.89       1726.24       313.46 o
 -10   9  14       2048.90       2348.28       350.65 o
  -9   9  14        844.12        820.08       229.25 o
  -8   9  14        683.86        693.31       201.08 o
  -7   9  14        116.59         98.08       112.95 o
  -6   9  14        219.59        402.39       173.66 o
  -5   9  14       4133.10       4384.61       430.27 o
  -4   9  14        490.32        447.56       163.66 o
  -3   9  14        344.68        748.47        95.97 o
  -2   9  14        197.99        547.54       121.96 o
  -1   9  14       5275.42       5380.20       268.28 o
   0   9  14        609.77        633.66       113.85 o
   1   9  14       5330.32       5288.70       270.19 o
   2   9  14        219.96        450.25       168.44 o
   3   9  14        590.97        684.49       218.78 o
   4   9  14        307.70        243.23       121.82 o
   5   9  14       3733.66       3502.85       382.88 o
   6   9  14        402.30        416.14       165.65 o
   7   9  14        133.17        168.42       139.08 o
   8   9  14        780.10       1003.46       225.23 o
   9   9  14        872.15        612.56       198.69 o
  10   9  14       2080.17       2115.64       335.36 o
  11   9  14       1682.42       1832.70       329.60 o
  12   9  14        325.54        349.34       175.27 o
  13   9  14        170.05        165.20       152.74 o
  14   9  14       1426.75        906.38       270.75 o
 -14  10  14         28.08        -20.90       129.01 o
 -13  10  14        343.00        345.32       171.25 o
 -12  10  14        302.17        391.94       197.38 o
 -11  10  14       1697.96       2105.49       361.38 o
 -10  10  14       1901.39       2163.10       362.66 o
  -9  10  14       1616.33       1605.35       317.13 o
  -8  10  14        134.02         43.41       111.34 o
  -7  10  14       4104.33       4637.81       493.35 o
  -6  10  14       1873.91       2089.56       337.39 o
  -5  10  14       6398.10       6343.10       556.46 o
  -4  10  14        831.03        625.09        99.10 o
  -3  10  14        682.21        841.18       142.07 o
  -2  10  14        293.22        605.89       118.62 o
  -1  10  14       1651.23       2264.46       214.07 o
   0  10  14      11468.90       8930.41       364.02 o
   1  10  14       2244.09       2747.25       212.37 o
   2  10  14        243.69        183.57        81.52 o
   3  10  14        841.62        680.21       214.40 o
   4  10  14       1006.85       1018.25       236.96 o
   5  10  14       6142.02       5655.84       515.09 o
   6  10  14       1882.93       2021.94       332.96 o
   7  10  14       4274.29       4891.48       492.62 o
   8  10  14        117.87         77.17       111.74 o
   9  10  14       1634.74       1179.98       265.21 o
  10  10  14       2071.70       1730.23       322.05 o
  11  10  14       1929.63       1870.80       337.69 o
  12  10  14        275.83        375.45       203.00 o
  13  10  14        358.76        480.40       216.28 o
  14  10  14         36.17         63.90       147.10 o
 -13  11  14         17.92        -38.18       122.98 o
 -12  11  14        281.41        120.19       149.94 o
 -11  11  14        742.97        733.07       251.73 o
 -10  11  14        383.82        652.48       225.53 o
  -9  11  14       1839.63       2544.16       388.00 o
  -8  11  14       3463.85       3039.84       416.36 o
  -7  11  14       1012.14       1354.39       284.39 o
  -6  11  14       2627.74       2566.11       380.69 o
  -5  11  14        171.39        197.77       131.44 o
  -4  11  14       1760.00       1779.77       342.19 o
  -3  11  14        364.23        370.57       108.51 o
  -2  11  14        861.73        688.78        78.40 o
  -1  11  14       1329.29       1448.37       167.81 o
   0  11  14       1835.41       1546.77       212.93 o
   1  11  14       1172.80        939.29       155.39 o
   2  11  14        794.42        531.25       116.59 o
   3  11  14        370.87        348.98       187.35 o
   4  11  14       1664.37       2097.61       351.41 o
   5  11  14         74.74        -34.97       125.40 o
   6  11  14       2847.38       2256.36       361.02 o
   7  11  14       1186.74       1207.75       266.33 o
   8  11  14       3203.24       2635.01       391.28 o
   9  11  14       1703.19       1933.37       342.89 o
  10  11  14        511.64        816.99       264.15 o
  11  11  14        882.61        788.24       252.56 o
  12  11  14        356.43        208.64       148.74 o
  13  11  14          1.82        -51.85       135.04 o
 -12  12  14         62.25         35.77       126.20 o
 -11  12  14         43.15         23.31       144.69 o
 -10  12  14        753.88       1269.12       308.03 o
  -9  12  14       1403.44       1797.23       337.56 o
  -8  12  14        276.68        432.14       213.86 o
  -7  12  14        283.68        595.36       227.13 o
  -6  12  14        219.14        371.03       193.75 o
  -5  12  14       7623.77       7770.20       675.19 o
  -4  12  14        318.54        401.62       190.56 o
  -3  12  14       1366.62       1654.98       194.43 o
  -2  12  14       1785.07       1515.31       161.58 o
  -1  12  14        248.64        700.40       149.99 o
   0  12  14        706.78        462.52       107.39 o
   1  12  14        161.99        377.50       104.38 o
   2  12  14       1977.95       1747.78       240.94 o
   3  12  14       1103.41       1153.45       272.16 o
   4  12  14        396.50        527.89       208.66 o
   5  12  14       7873.78       6941.14       625.97 o
   6  12  14        214.30        513.32       213.85 o
   7  12  14        230.05        303.90       178.48 o
   8  12  14        237.75        315.96       178.48 o
   9  12  14       1452.37       1950.59       350.45 o
  10  12  14        571.70       1001.57       277.03 o
  11  12  14         43.23          3.22       125.80 o
  12  12  14        108.43          0.40       131.43 o
 -11  13  14        153.73        481.53       244.38 o
 -10  13  14         41.00         44.61       139.06 o
  -9  13  14          9.51         10.05       127.00 o
[truncated: 584,186 more chars]
