# Supplementary material for: Expanding the antibacterial selectivity of polyether ionophore antibiotics through diversity-focused semisynthesis
Source: Springer Nature journal article supplement (doi:10.1038/s41557-020-00601-1), 2020-12-22
Supplement: 41557_2020_601_MOESM79_ESM.cif [file 41557_2020_601_MOESM79_ESM.cif]

data_20181024_shao_0m
_audit_creation_date               2018-10-26
_audit_creation_method
;
Olex2 1.2
(compiled 2018.05.29 svn.r3508 for OlexSys, GUI svn.r5506)
;
_shelx_SHELXL_version_number       '2016/6'
_audit_contact_author_address      ?
_audit_contact_author_email        ?
_audit_contact_author_name         ''
_audit_contact_author_phone        ?
_publ_contact_author_id_orcid      ?
_publ_section_references
;
Dolomanov, O.V., Bourhis, L.J., Gildea, R.J, Howard, J.A.K. & Puschmann, H.
 (2009), J. Appl. Cryst. 42, 339-341.

Sheldrick, G.M. (2015). Acta Cryst. C71, 3-8.
;
_chemical_name_common              ?
_chemical_name_systematic          ?
_chemical_formula_moiety           'C38 H58 Cl Na O10, 2(C2 H3 N), H2 O'
_chemical_formula_sum              'C42 H66 Cl N2 Na O11'
_chemical_formula_weight           833.40
_chemical_absolute_configuration   ad
_chemical_melting_point            ?
loop_
  _atom_type_symbol
  _atom_type_description
  _atom_type_scat_dispersion_real
  _atom_type_scat_dispersion_imag
  _atom_type_scat_source
 'C' 'C' 0.0015 0.0009 'International Tables Vol C Tables 4.2.6.8 and 6.1.1.4'
 'H' 'H' 0.0000 0.0000 'International Tables Vol C Tables 4.2.6.8 and 6.1.1.4'
 'Cl' 'Cl' 0.0998 0.0984 'International Tables Vol C Tables 4.2.6.8 and 6.1.1.4'
 'N' 'N' 0.0030 0.0019 'International Tables Vol C Tables 4.2.6.8 and 6.1.1.4'
 'Na' 'Na' 0.0218 0.0150 'International Tables Vol C Tables 4.2.6.8 and 6.1.1.4'
 'O' 'O' 0.0056 0.0036 'International Tables Vol C Tables 4.2.6.8 and 6.1.1.4'

_shelx_space_group_comment
;
The symmetry employed for this shelxl refinement is uniquely defined
by the following loop, which should always be used as a source of
symmetry information in preference to the above space-group names.
They are only intended as comments.
;
_space_group_crystal_system        'orthorhombic'
_space_group_IT_number             19
_space_group_name_H-M_alt          'P 21 21 21'
_space_group_name_Hall             'P 2ac 2ab'
loop_
  _space_group_symop_operation_xyz
 'x, y, z'
 '-x+1/2, -y, z+1/2'
 '-x, y+1/2, -z+1/2'
 'x+1/2, -y+1/2, -z'

_cell_length_a                     11.9272(18)
_cell_length_b                     13.616(2)
_cell_length_c                     27.774(4)
_cell_angle_alpha                  90
_cell_angle_beta                   90
_cell_angle_gamma                  90
_cell_volume                       4510.7(12)
_cell_formula_units_Z              4
_cell_measurement_reflns_used      8231
_cell_measurement_temperature      100
_cell_measurement_theta_max        18.16
_cell_measurement_theta_min        2.20
_shelx_estimated_absorpt_T_max     ?
_shelx_estimated_absorpt_T_min     ?
_exptl_absorpt_coefficient_mu      0.087
_exptl_absorpt_correction_T_max    1.0000
_exptl_absorpt_correction_T_min    0.8186
_exptl_absorpt_correction_type     multi-scan
_exptl_absorpt_process_details    
 'SADABS-2016/2 (Bruker,2016/2) was used for absorption correction. wR2(int) was 0.1685 before and 0.0556 after correction. The Ratio of minimum to maximum transmission is 0.8186. The \l/2 correction factor is Not present.'
_exptl_absorpt_special_details     ?
_exptl_crystal_colour              'clear light white'
_exptl_crystal_colour_lustre       clear
_exptl_crystal_colour_modifier     light
_exptl_crystal_colour_primary      white
_exptl_crystal_density_diffrn      1.227
_exptl_crystal_density_meas        ?
_exptl_crystal_density_method      ?
_exptl_crystal_description         plate
_exptl_crystal_F_000               1792
_exptl_crystal_preparation         ?
_exptl_crystal_recrystallization_method  'Crystallized in MeCN'
_exptl_crystal_size_max            0.826
_exptl_crystal_size_mid            0.685
_exptl_crystal_size_min            0.11
_exptl_transmission_factor_max     ?
_exptl_transmission_factor_min     ?
_diffrn_reflns_av_R_equivalents    0.0474
_diffrn_reflns_av_unetI/netI       0.0408
_diffrn_reflns_Laue_measured_fraction_full  0.978
_diffrn_reflns_Laue_measured_fraction_max  0.978
_diffrn_reflns_limit_h_max         13
_diffrn_reflns_limit_h_min         -13
_diffrn_reflns_limit_k_max         15
_diffrn_reflns_limit_k_min         -14
_diffrn_reflns_limit_l_max         30
_diffrn_reflns_limit_l_min         -30
_diffrn_reflns_number              25547
_diffrn_reflns_point_group_measured_fraction_full  0.959
_diffrn_reflns_point_group_measured_fraction_max  0.959
_diffrn_reflns_theta_full          18.197
_diffrn_reflns_theta_max           18.197
_diffrn_reflns_theta_min           1.882
_diffrn_ambient_temperature        100
_diffrn_detector_area_resol_mean   8
_diffrn_measured_fraction_theta_full  0.978
_diffrn_measured_fraction_theta_max  0.978
_diffrn_measurement_device_type    'Bruker APEX-II CCD'
_diffrn_measurement_method         '\f and \w scans'
_diffrn_radiation_monochromator    graphite
_diffrn_radiation_type             AgK\a
_diffrn_radiation_wavelength       0.56086
_diffrn_source                     'sealed tube'
_diffrn_standards_number           0
_reflns_Friedel_coverage           0.741
_reflns_Friedel_fraction_full      0.934
_reflns_Friedel_fraction_max       0.934
_reflns_number_gt                  5591
_reflns_number_total               6250
_reflns_special_details
;
 Reflections were merged by SHELXL according to the crystal
 class for the calculation of statistics and refinement.
 
 _reflns_Friedel_fraction is defined as the number of unique
 Friedel pairs measured divided by the number that would be
 possible theoretically, ignoring centric projections and
 systematic absences.
;
_reflns_threshold_expression       'I > 2\s(I)'
_computing_cell_refinement         'SAINT V8.38A (Bruker, 2016)'
_computing_data_collection         ?
_computing_data_reduction          'SAINT V8.38A (Bruker, 2016)'
_computing_molecular_graphics      'Olex2 (Dolomanov et al., 2009)'
_computing_publication_material    'Olex2 (Dolomanov et al., 2009)'
_computing_structure_refinement    'ShelXL (Sheldrick, 2015)'
_computing_structure_solution      'XT (Sheldrick, 2015)'
_refine_diff_density_max           0.675
_refine_diff_density_min           -0.367
_refine_diff_density_rms           0.050
_refine_ls_abs_structure_details
;
 Flack x determined using 2144 quotients [(I+)-(I-)]/[(I+)+(I-)]
 (Parsons, Flack and Wagner, Acta Cryst. B69 (2013) 249-259).
;
_refine_ls_abs_structure_Flack     0.01(6)
_refine_ls_extinction_coef         .
_refine_ls_extinction_method       none
_refine_ls_goodness_of_fit_ref     1.045
_refine_ls_hydrogen_treatment      mixed
_refine_ls_matrix_type             full
_refine_ls_number_parameters       532
_refine_ls_number_reflns           6250
_refine_ls_number_restraints       3
_refine_ls_R_factor_all            0.0538
_refine_ls_R_factor_gt             0.0462
_refine_ls_restrained_S_all        3.597
_refine_ls_shift/su_max            0.001
_refine_ls_shift/su_mean           0.000
_refine_ls_structure_factor_coef   Fsqd
_refine_ls_weighting_details      
 'w=1/[\s^2^(Fo^2^)+(0.0655P)^2^+2.8368P] where P=(Fo^2^+2Fc^2^)/3'
_refine_ls_weighting_scheme        calc
_refine_ls_wR_factor_gt            0.1162
_refine_ls_wR_factor_ref           0.1210
_refine_special_details            ?
_olex2_refinement_description
;
1. Fixed Uiso
 At 1.2 times of:
  All C(H) groups, All C(H,H) groups
 At 1.5 times of:
  All C(H,H,H) groups, All O(H) groups, All O(H,H) groups
2. Restrained distances
 O1-H1
 0.85 with sigma of 0.01
 C3-H1
 1.909373 with sigma of 0.02
 Na1-H1
 3.003821 with sigma of 0.02
3.a Free rotating group:
 O1SO(H1SD,H1SO)
3.b Ternary CH refined with riding coordinates:
 C20(H20), C25(H25), C29(H29), C26(H26), C31(H31), C15(H15), C23(H23),
 C22(H22), C16(H16), C13(H13), C8(H8), C4(H4)
3.c Secondary CH2 refined with riding coordinates:
 C32(H32A,H32B), C12(H12A,H12B), C6(H6A,H6B), C17(H17A,H17B), C28(H28A,H28B),
 C7(H7A,H7B), C2(H2A,H2B), C10(H10A,H10B)
3.d Aromatic/amide H refined with riding coordinates:
 C38(H38)
3.e Idealised Me refined as rotating group:
 C21(H21A,H21B,H21C), C18(H18A,H18B,H18C), C27(H27A,H27B,H27C), C1(H1A,H1B,
 H1C), C5(H5A,H5B,H5C), C14(H14A,H14B,H14C), C30(H30A,H30B,H30C), C11(H11A,H11B,
 H11C), C24(H24A,H24B,H24C), C1SO(H1SA,H1SB,H1SC), C3SO(H3SA,H3SB,H3SC)
3.f Idealised tetrahedral OH refined as rotating group:
 O5(H5)
;
_atom_sites_solution_hydrogens     mixed
_atom_sites_solution_primary       dual
_atom_sites_solution_secondary     ?
loop_
  _atom_site_label
  _atom_site_type_symbol
  _atom_site_fract_x
  _atom_site_fract_y
  _atom_site_fract_z
  _atom_site_U_iso_or_equiv
  _atom_site_adp_type
  _atom_site_occupancy
  _atom_site_site_symmetry_order
  _atom_site_calc_flag
  _atom_site_refinement_flags_posn
  _atom_site_refinement_flags_adp
  _atom_site_refinement_flags_occupancy
  _atom_site_disorder_assembly
  _atom_site_disorder_group
 Cl1 Cl 0.14432(12) -0.24742(10) 0.53702(5) 0.0437(4) Uani 1 1 d . . . . .
 O6 O 0.5134(3) 0.1519(2) 0.40033(10) 0.0212(7) Uani 1 1 d . . . . .
 O3 O 0.3076(2) 0.5499(2) 0.39292(10) 0.0222(7) Uani 1 1 d . . . . .
 O5 O 0.6625(3) 0.2513(2) 0.50119(11) 0.0250(7) Uani 1 1 d . . . . .
 H5 H 0.674576 0.193468 0.494768 0.038 Uiso 1 1 calc GR . . . .
 O4 O 0.3445(3) 0.3861(2) 0.45990(10) 0.0227(7) Uani 1 1 d . . . . .
 O7 O 0.6342(3) 0.0469(2) 0.49363(11) 0.0260(8) Uani 1 1 d . . . . .
 O2 O 0.1241(3) 0.4920(2) 0.33589(11) 0.0276(8) Uani 1 1 d . . . . .
 O9 O 0.3362(3) -0.0977(3) 0.54175(12) 0.0337(8) Uani 1 1 d . . . . .
 O1 O 0.1348(3) 0.3029(2) 0.36861(11) 0.0279(8) Uani 1 1 d D . . . .
 H1 H 0.198(3) 0.273(4) 0.3850(12) 0.042 Uiso 1 1 d DR . . . .
 O10 O 0.3889(3) -0.1383(3) 0.41830(13) 0.0352(9) Uani 1 1 d . . . . .
 O8 O 0.4740(3) -0.0015(3) 0.57016(12) 0.0347(9) Uani 1 1 d . . . . .
 C20 C 0.5189(4) 0.3739(3) 0.50140(15) 0.0210(10) Uani 1 1 d . . . . .
 H20 H 0.579900 0.419566 0.509038 0.025 Uiso 1 1 calc R . . . .
 C25 C 0.6173(4) 0.2063(4) 0.39507(16) 0.0243(11) Uani 1 1 d . . . . .
 H25 H 0.677403 0.170072 0.411269 0.029 Uiso 1 1 calc R . . . .
 C29 C 0.5475(4) 0.0505(4) 0.32955(17) 0.0304(12) Uani 1 1 d . . . . .
 H29 H 0.486041 0.082729 0.312280 0.036 Uiso 1 1 calc R . . . .
 C26 C 0.6457(4) 0.2142(4) 0.34115(16) 0.0284(11) Uani 1 1 d . . . . .
 H26 H 0.720208 0.244044 0.338462 0.034 Uiso 1 1 calc R . . . .
 C31 C 0.5181(4) 0.0511(4) 0.38300(16) 0.0241(11) Uani 1 1 d . . . . .
 H31 H 0.442474 0.023646 0.386087 0.029 Uiso 1 1 calc R . . . .
 C33 C 0.5693(4) -0.0011(3) 0.46708(18) 0.0240(11) Uani 1 1 d . . . . .
 C19 C 0.4322(4) 0.4267(3) 0.46992(15) 0.0202(10) Uani 1 1 d . . . . .
 C32 C 0.5962(4) -0.0123(4) 0.41424(17) 0.0257(11) Uani 1 1 d . . . . .
 H32A H 0.588321 -0.080696 0.405076 0.031 Uiso 1 1 calc R . . . .
 H32B H 0.673390 0.006952 0.408581 0.031 Uiso 1 1 calc R . . . .
 C3 C 0.1229(4) 0.3167(4) 0.31719(17) 0.0299(12) Uani 1 1 d D . . . .
 C36 C 0.3930(4) -0.1093(3) 0.46069(19) 0.0271(11) Uani 1 1 d . . . . .
 C12 C 0.3992(4) 0.6257(4) 0.32621(17) 0.0304(12) Uani 1 1 d . . . . .
 H12A H 0.393779 0.691452 0.312968 0.036 Uiso 1 1 calc R . . . .
 H12B H 0.426510 0.581781 0.301340 0.036 Uiso 1 1 calc R . . . .
 C34 C 0.4689(4) -0.0464(4) 0.48544(17) 0.0240(11) Uani 1 1 d . . . . .
 C15 C 0.4273(4) 0.5385(4) 0.39821(16) 0.0216(10) Uani 1 1 d . . . . .
 H15 H 0.449371 0.477343 0.382172 0.026 Uiso 1 1 calc R . . . .
 C23 C 0.5993(4) 0.3040(4) 0.42135(16) 0.0231(11) Uani 1 1 d . . . . .
 H23 H 0.536317 0.337751 0.405885 0.028 Uiso 1 1 calc R . . . .
 C6 C 0.2374(4) 0.3273(4) 0.29374(17) 0.0301(12) Uani 1 1 d . . . . .
 H6A H 0.279992 0.267352 0.298434 0.036 Uiso 1 1 calc R . . . .
 H6B H 0.228179 0.337289 0.259389 0.036 Uiso 1 1 calc R . . . .
 C22 C 0.5673(4) 0.2852(3) 0.47415(15) 0.0218(11) Uani 1 1 d . . . . .
 H22 H 0.510689 0.233074 0.474613 0.026 Uiso 1 1 calc R . . . .
 C17 C 0.3955(4) 0.6065(4) 0.48271(16) 0.0285(12) Uani 1 1 d . . . . .
 H17A H 0.405722 0.670749 0.468250 0.034 Uiso 1 1 calc R . . . .
 H17B H 0.315850 0.591962 0.482212 0.034 Uiso 1 1 calc R . . . .
 C16 C 0.4572(4) 0.5295(3) 0.45155(16) 0.0212(11) Uani 1 1 d . . . . .
 H16 H 0.537922 0.540962 0.454878 0.025 Uiso 1 1 calc R . . . .
 C9 C 0.2850(4) 0.5912(4) 0.34503(16) 0.0258(11) Uani 1 1 d . . . . .
 C35 C 0.4360(4) -0.0419(4) 0.53497(19) 0.0269(11) Uani 1 1 d . . . . .
 C28 C 0.6532(5) 0.1097(4) 0.32049(16) 0.0333(12) Uani 1 1 d . . . . .
 H28A H 0.666412 0.113481 0.286083 0.040 Uiso 1 1 calc R . . . .
 H28B H 0.716459 0.076058 0.334956 0.040 Uiso 1 1 calc R . . . .
 C13 C 0.4778(4) 0.6244(4) 0.36999(17) 0.0268(11) Uani 1 1 d . . . . .
 H13 H 0.468525 0.685249 0.388397 0.032 Uiso 1 1 calc R . . . .
 C37 C 0.3105(4) -0.1404(4) 0.49750(18) 0.0291(12) Uani 1 1 d . . . . .
 C8 C 0.2334(4) 0.5079(4) 0.31504(17) 0.0270(11) Uani 1 1 d . . . . .
 H8 H 0.224215 0.530365 0.281754 0.032 Uiso 1 1 calc R . . . .
 C7 C 0.3013(4) 0.4133(4) 0.31512(17) 0.0280(12) Uani 1 1 d . . . . .
 H7A H 0.369676 0.423417 0.296844 0.034 Uiso 1 1 calc R . . . .
 H7B H 0.322394 0.397523 0.347960 0.034 Uiso 1 1 calc R . . . .
 C21 C 0.4650(5) 0.3388(4) 0.54826(16) 0.0316(12) Uani 1 1 d . . . . .
 H21A H 0.445852 0.394508 0.567766 0.047 Uiso 1 1 calc GR . . . .
 H21B H 0.516866 0.297746 0.565405 0.047 Uiso 1 1 calc GR . . . .
 H21C H 0.398414 0.302014 0.541033 0.047 Uiso 1 1 calc GR . . . .
 C2 C 0.0584(4) 0.2305(4) 0.29582(18) 0.0361(13) Uani 1 1 d . . . . .
 H2A H 0.053988 0.239587 0.261235 0.043 Uiso 1 1 calc R . . . .
 H2B H 0.101010 0.170945 0.301606 0.043 Uiso 1 1 calc R . . . .
 C18 C 0.4345(5) 0.6110(4) 0.53518(18) 0.0396(14) Uani 1 1 d . . . . .
 H18A H 0.514344 0.619882 0.536145 0.059 Uiso 1 1 calc GR . . . .
 H18B H 0.415127 0.550886 0.551189 0.059 Uiso 1 1 calc GR . . . .
 H18C H 0.398602 0.665104 0.551109 0.059 Uiso 1 1 calc GR . . . .
 C27 C 0.5645(5) 0.2782(4) 0.31327(17) 0.0365(13) Uani 1 1 d . . . . .
 H27A H 0.489184 0.256430 0.319130 0.055 Uiso 1 1 calc GR . . . .
 H27B H 0.580657 0.273597 0.279482 0.055 Uiso 1 1 calc GR . . . .
 H27C H 0.572226 0.345222 0.323525 0.055 Uiso 1 1 calc GR . . . .
 C1 C -0.0571(5) 0.2158(5) 0.31463(19) 0.0430(15) Uani 1 1 d . . . . .
 H1A H -0.084591 0.152788 0.304522 0.065 Uiso 1 1 calc GR . . . .
 H1B H -0.105332 0.266392 0.302358 0.065 Uiso 1 1 calc GR . . . .
 H1C H -0.056092 0.218660 0.349167 0.065 Uiso 1 1 calc GR . . . .
 C5 C 0.0233(5) 0.4427(4) 0.26242(19) 0.0395(13) Uani 1 1 d . . . . .
 H5A H -0.011797 0.506113 0.262784 0.059 Uiso 1 1 calc GR . . . .
 H5B H -0.028798 0.394760 0.250437 0.059 Uiso 1 1 calc GR . . . .
 H5C H 0.088073 0.444508 0.241942 0.059 Uiso 1 1 calc GR . . . .
 C4 C 0.0587(4) 0.4150(4) 0.31344(18) 0.0318(12) Uani 1 1 d . . . . .
 H4 H -0.010054 0.407767 0.332412 0.038 Uiso 1 1 calc R . . . .
 C14 C 0.5991(4) 0.6116(4) 0.35669(19) 0.0387(14) Uani 1 1 d . . . . .
 H14A H 0.607193 0.554787 0.336534 0.058 Uiso 1 1 calc GR . . . .
 H14B H 0.642873 0.603186 0.385403 0.058 Uiso 1 1 calc GR . . . .
 H14C H 0.624684 0.668717 0.339656 0.058 Uiso 1 1 calc GR . . . .
 C10 C 0.2049(4) 0.6769(4) 0.35411(18) 0.0324(12) Uani 1 1 d . . . . .
 H10A H 0.243525 0.726943 0.372633 0.039 Uiso 1 1 calc R . . . .
 H10B H 0.141966 0.653884 0.373146 0.039 Uiso 1 1 calc R . . . .
 C30 C 0.5565(5) -0.0555(4) 0.31030(19) 0.0425(14) Uani 1 1 d . . . . .
 H30A H 0.626229 -0.083815 0.320587 0.064 Uiso 1 1 calc GR . . . .
 H30B H 0.553606 -0.054684 0.275762 0.064 Uiso 1 1 calc GR . . . .
 H30C H 0.495377 -0.093876 0.322575 0.064 Uiso 1 1 calc GR . . . .
 C11 C 0.1601(5) 0.7233(4) 0.3070(2) 0.0435(15) Uani 1 1 d . . . . .
 H11A H 0.122851 0.673962 0.288187 0.065 Uiso 1 1 calc GR . . . .
 H11B H 0.221519 0.750010 0.288888 0.065 Uiso 1 1 calc GR . . . .
 H11C H 0.108054 0.774827 0.314649 0.065 Uiso 1 1 calc GR . . . .
 C24 C 0.7031(4) 0.3699(4) 0.41652(18) 0.0305(12) Uani 1 1 d . . . . .
 H24A H 0.767645 0.335821 0.428681 0.046 Uiso 1 1 calc GR . . . .
 H24B H 0.691924 0.429141 0.434633 0.046 Uiso 1 1 calc GR . . . .
 H24C H 0.714707 0.385943 0.383236 0.046 Uiso 1 1 calc GR . . . .
 N1SO N 0.8605(6) 0.8279(6) 0.3422(2) 0.0796(19) Uani 1 1 d . . . . .
 C38 C 0.2273(4) -0.2032(4) 0.4917(2) 0.0363(13) Uani 1 1 d . . . . .
 H38 H 0.212729 -0.225131 0.460624 0.044 Uiso 1 1 calc R . . . .
 C2SO C 0.8664(6) 0.7433(7) 0.3404(2) 0.0604(19) Uani 1 1 d . . . . .
 C1SO C 0.8769(6) 0.6372(6) 0.3375(3) 0.0635(19) Uani 1 1 d . . . . .
 H1SA H 0.838159 0.613801 0.309414 0.095 Uiso 1 1 calc GR . . . .
 H1SB H 0.844859 0.607839 0.365708 0.095 Uiso 1 1 calc GR . . . .
 H1SC H 0.954764 0.619681 0.335301 0.095 Uiso 1 1 calc GR . . . .
 Na1 Na 0.65961(14) 0.06092(13) 0.57766(6) 0.0236(4) Uani 1 1 d D . . . .
 N2SO N 0.2674(7) 0.0045(8) 0.2766(4) 0.110(3) Uani 1 1 d . . . . .
 C3SO C 0.1777(8) -0.0283(6) 0.3598(3) 0.087(3) Uani 1 1 d . . . . .
 H3SA H 0.100909 -0.047699 0.355535 0.131 Uiso 1 1 calc GR . . . .
 H3SB H 0.180714 0.030349 0.378930 0.131 Uiso 1 1 calc GR . . . .
 H3SC H 0.217870 -0.079911 0.375875 0.131 Uiso 1 1 calc GR . . . .
 C4SO C 0.2290(8) -0.0096(7) 0.3125(5) 0.087(3) Uani 1 1 d . . . . .
 O1SO O 0.2751(3) 0.1732(3) 0.41448(12) 0.0289(8) Uani 1 1 d . . . . .
 H1SD H 0.346295 0.174746 0.412576 0.043 Uiso 1 1 d G . . A 1
 H1SO H 0.260992 0.190690 0.443225 0.043 Uiso 1 1 d G . . . .

loop_
  _atom_site_aniso_label
  _atom_site_aniso_U_11
  _atom_site_aniso_U_22
  _atom_site_aniso_U_33
  _atom_site_aniso_U_23
  _atom_site_aniso_U_13
  _atom_site_aniso_U_12
 Cl1 0.0430(8) 0.0278(7) 0.0602(8) 0.0016(7) 0.0168(8) -0.0064(6)
 O6 0.0225(16) 0.0194(17) 0.0218(16) -0.0044(14) 0.0021(14) 0.0017(14)
 O3 0.0246(17) 0.0230(18) 0.0191(15) 0.0047(14) -0.0046(14) 0.0019(15)
 O5 0.0274(17) 0.0215(17) 0.0262(15) -0.0038(14) -0.0067(15) 0.0059(16)
 O4 0.0222(18) 0.0225(17) 0.0232(15) 0.0007(14) 0.0030(15) 0.0012(15)
 O7 0.0256(17) 0.0251(18) 0.0273(16) 0.0021(15) 0.0011(16) -0.0005(16)
 O2 0.0286(18) 0.0242(18) 0.0300(17) 0.0024(15) -0.0119(16) -0.0031(16)
 O9 0.0312(19) 0.0316(19) 0.0383(19) 0.0005(16) 0.0039(17) -0.0052(17)
 O1 0.0280(18) 0.034(2) 0.0219(16) 0.0057(14) -0.0047(15) -0.0004(16)
 O10 0.042(2) 0.0250(19) 0.039(2) -0.0030(17) -0.0025(18) -0.0013(16)
 O8 0.034(2) 0.040(2) 0.0300(19) 0.0007(17) 0.0037(17) -0.0051(18)
 C20 0.025(2) 0.020(3) 0.018(2) -0.002(2) -0.007(2) 0.005(2)
 C25 0.021(2) 0.026(3) 0.026(2) 0.000(2) 0.000(2) -0.001(2)
 C29 0.033(3) 0.030(3) 0.028(3) -0.006(2) 0.000(2) 0.004(2)
 C26 0.029(3) 0.031(3) 0.024(2) 0.001(2) 0.012(2) -0.003(2)
 C31 0.025(2) 0.020(3) 0.027(2) -0.006(2) 0.000(2) -0.001(2)
 C33 0.022(2) 0.017(2) 0.033(3) 0.001(2) 0.001(2) 0.008(2)
 C19 0.023(3) 0.021(3) 0.017(2) -0.006(2) 0.001(2) 0.003(2)
 C32 0.025(3) 0.022(3) 0.030(2) 0.000(2) 0.004(2) 0.002(2)
 C3 0.037(3) 0.027(3) 0.025(2) 0.004(2) -0.011(2) -0.002(2)
 C36 0.029(3) 0.015(3) 0.037(3) 0.000(2) -0.003(2) 0.006(2)
 C12 0.037(3) 0.024(3) 0.030(3) 0.004(2) -0.002(2) -0.005(2)
 C34 0.022(2) 0.017(2) 0.033(3) 0.000(2) -0.001(2) 0.002(2)
 C15 0.023(2) 0.020(3) 0.021(2) -0.002(2) -0.003(2) 0.001(2)
 C23 0.022(2) 0.025(3) 0.023(2) 0.002(2) 0.001(2) 0.002(2)
 C6 0.037(3) 0.030(3) 0.023(2) 0.000(2) 0.000(2) -0.004(2)
 C22 0.022(2) 0.021(3) 0.023(2) 0.002(2) -0.002(2) 0.003(2)
 C17 0.037(3) 0.020(3) 0.028(3) -0.002(2) -0.003(2) 0.007(2)
 C16 0.018(2) 0.023(3) 0.023(2) 0.000(2) -0.003(2) 0.000(2)
 C9 0.033(3) 0.025(3) 0.020(2) 0.006(2) -0.009(2) -0.003(2)
 C35 0.023(2) 0.023(3) 0.035(3) 0.008(3) 0.002(2) 0.000(2)
 C28 0.043(3) 0.036(3) 0.021(2) -0.003(2) 0.008(2) 0.007(3)
 C13 0.031(3) 0.024(3) 0.025(2) 0.004(2) -0.005(2) -0.004(2)
 C37 0.027(3) 0.016(3) 0.044(3) 0.008(2) -0.002(2) 0.002(2)
 C8 0.029(3) 0.031(3) 0.021(2) 0.003(2) -0.005(2) -0.003(2)
 C7 0.033(3) 0.028(3) 0.023(2) 0.002(2) 0.007(2) -0.002(2)
 C21 0.043(3) 0.032(3) 0.020(2) 0.002(2) 0.000(2) 0.013(3)
 C2 0.037(3) 0.037(3) 0.035(3) 0.003(3) -0.005(3) -0.005(3)
 C18 0.055(3) 0.034(3) 0.029(3) -0.012(3) -0.010(3) 0.006(3)
 C27 0.051(3) 0.036(3) 0.023(2) -0.001(2) 0.008(3) 0.007(3)
 C1 0.043(3) 0.053(4) 0.033(3) 0.000(3) -0.001(3) -0.008(3)
 C5 0.043(3) 0.035(3) 0.041(3) 0.004(3) -0.017(3) -0.006(3)
 C4 0.027(3) 0.034(3) 0.034(3) 0.002(2) -0.008(2) -0.004(2)
 C14 0.037(3) 0.042(3) 0.036(3) 0.010(3) -0.002(3) -0.010(3)
 C10 0.037(3) 0.025(3) 0.035(3) 0.002(2) -0.013(2) -0.002(2)
 C30 0.059(4) 0.037(3) 0.032(3) -0.014(3) 0.006(3) 0.005(3)
 C11 0.050(3) 0.032(3) 0.048(3) 0.007(3) -0.026(3) 0.003(3)
 C24 0.029(3) 0.025(3) 0.037(3) 0.000(2) 0.005(2) -0.002(2)
 N1SO 0.101(5) 0.086(5) 0.052(3) 0.001(4) -0.001(4) 0.011(5)
 C38 0.034(3) 0.027(3) 0.048(3) 0.002(3) 0.000(3) 0.002(3)
 C2SO 0.059(4) 0.090(6) 0.032(3) 0.004(4) 0.005(3) 0.013(5)
 C1SO 0.055(4) 0.077(5) 0.059(4) 0.011(4) -0.001(4) 0.008(4)
 Na1 0.0234(9) 0.0267(10) 0.0209(8) -0.0007(8) 0.0030(8) -0.0030(8)
 N2SO 0.059(5) 0.098(7) 0.174(10) 0.011(7) -0.008(6) -0.007(5)
 C3SO 0.114(7) 0.045(5) 0.104(7) -0.022(5) -0.060(6) 0.008(5)
 C4SO 0.062(6) 0.045(5) 0.154(10) -0.011(7) -0.059(7) 0.006(5)
 O1SO 0.0269(17) 0.032(2) 0.0280(17) -0.0054(16) -0.0006(15) 0.0066(17)

_geom_special_details
;
 All esds (except the esd in the dihedral angle between two l.s. planes)
 are estimated using the full covariance matrix.  The cell esds are taken
 into account individually in the estimation of esds in distances, angles
 and torsion angles; correlations between esds in cell parameters are only
 used when they are defined by crystal symmetry.  An approximate (isotropic)
 treatment of cell esds is used for estimating esds involving l.s. planes.
;
loop_
  _geom_bond_atom_site_label_1
  _geom_bond_atom_site_label_2
  _geom_bond_distance
  _geom_bond_site_symmetry_2
  _geom_bond_publ_flag
 Cl1 C38 1.711(6) . ?
 O6 C25 1.452(6) . ?
 O6 C31 1.456(6) . ?
 O3 C15 1.444(5) . ?
 O3 C9 1.469(5) . ?
 O3 Na1 2.462(4) 4_456 ?
 O5 H5 0.8200 . ?
 O5 C22 1.438(5) . ?
 O4 C19 1.215(5) . ?
 O4 Na1 2.544(3) 4_456 ?
 O7 C33 1.253(6) . ?
 O7 Na1 2.361(3) . ?
 O2 C8 1.442(6) . ?
 O2 C4 1.448(6) . ?
 O2 Na1 2.542(3) 4_456 ?
 O9 C35 1.425(6) . ?
 O9 C37 1.393(6) . ?
 O1 H1 0.972(13) . ?
 O1 C3 1.447(6) . ?
 O1 Na1 2.399(4) 4_456 ?
 O10 C36 1.243(6) . ?
 O8 C35 1.210(6) . ?
 O8 Na1 2.380(4) . ?
 C20 H20 0.9800 . ?
 C20 C19 1.534(6) . ?
 C20 C22 1.537(6) . ?
 C20 C21 1.529(6) . ?
 C25 H25 0.9800 . ?
 C25 C26 1.539(6) . ?
 C25 C23 1.532(7) . ?
 C29 H29 0.9800 . ?
 C29 C31 1.526(7) . ?
 C29 C28 1.517(8) . ?
 C29 C30 1.542(8) . ?
 C26 H26 0.9800 . ?
 C26 C28 1.538(7) . ?
 C26 C27 1.515(7) . ?
 C31 H31 0.9800 . ?
 C31 C32 1.538(7) . ?
 C33 C32 1.510(7) . ?
 C33 C34 1.441(7) . ?
 C19 C16 1.519(7) . ?
 C32 H32A 0.9700 . ?
 C32 H32B 0.9700 . ?
 C3 C6 1.520(7) . ?
 C3 C2 1.523(7) . ?
 C3 C4 1.545(7) . ?
 C36 C34 1.424(7) . ?
 C36 C37 1.480(7) . ?
 C12 H12A 0.9700 . ?
 C12 H12B 0.9700 . ?
 C12 C9 1.533(7) . ?
 C12 C13 1.535(7) . ?
 C34 C35 1.432(7) . ?
 C15 H15 0.9800 . ?
 C15 C16 1.528(6) . ?
 C15 C13 1.532(7) . ?
 C23 H23 0.9800 . ?
 C23 C22 1.537(6) . ?
 C23 C24 1.535(7) . ?
 C6 H6A 0.9700 . ?
 C6 H6B 0.9700 . ?
 C6 C7 1.519(7) . ?
 C22 H22 0.9800 . ?
 C17 H17A 0.9700 . ?
 C17 H17B 0.9700 . ?
 C17 C16 1.546(7) . ?
 C17 C18 1.531(7) . ?
 C16 H16 0.9800 . ?
 C9 C8 1.537(7) . ?
 C9 C10 1.529(7) . ?
 C28 H28A 0.9700 . ?
 C28 H28B 0.9700 . ?
 C13 H13 0.9800 . ?
 C13 C14 1.503(7) . ?
 C37 C38 1.320(7) . ?
 C8 H8 0.9800 . ?
 C8 C7 1.522(7) . ?
 C7 H7A 0.9700 . ?
 C7 H7B 0.9700 . ?
 C21 H21A 0.9600 . ?
 C21 H21B 0.9600 . ?
 C21 H21C 0.9600 . ?
 C2 H2A 0.9700 . ?
 C2 H2B 0.9700 . ?
 C2 C1 1.488(8) . ?
 C18 H18A 0.9600 . ?
 C18 H18B 0.9600 . ?
 C18 H18C 0.9600 . ?
 C27 H27A 0.9600 . ?
 C27 H27B 0.9600 . ?
 C27 H27C 0.9600 . ?
 C1 H1A 0.9600 . ?
 C1 H1B 0.9600 . ?
 C1 H1C 0.9600 . ?
 C5 H5A 0.9600 . ?
 C5 H5B 0.9600 . ?
 C5 H5C 0.9600 . ?
 C5 C4 1.526(7) . ?
 C4 H4 0.9800 . ?
 C14 H14A 0.9600 . ?
 C14 H14B 0.9600 . ?
 C14 H14C 0.9600 . ?
 C10 H10A 0.9700 . ?
 C10 H10B 0.9700 . ?
 C10 C11 1.549(7) . ?
 C30 H30A 0.9600 . ?
 C30 H30B 0.9600 . ?
 C30 H30C 0.9600 . ?
 C11 H11A 0.9600 . ?
 C11 H11B 0.9600 . ?
 C11 H11C 0.9600 . ?
 C24 H24A 0.9600 . ?
 C24 H24B 0.9600 . ?
 C24 H24C 0.9600 . ?
 N1SO C2SO 1.156(10) . ?
 C38 H38 0.9300 . ?
 C2SO C1SO 1.453(11) . ?
 C1SO H1SA 0.9600 . ?
 C1SO H1SB 0.9600 . ?
 C1SO H1SC 0.9600 . ?
 N2SO C4SO 1.114(14) . ?
 C3SO H3SA 0.9600 . ?
 C3SO H3SB 0.9600 . ?
 C3SO H3SC 0.9600 . ?
 C3SO C4SO 1.472(15) . ?
 O1SO H1SD 0.8505 . ?
 O1SO H1SO 0.8498 . ?

loop_
  _geom_angle_atom_site_label_1
  _geom_angle_atom_site_label_2
  _geom_angle_atom_site_label_3
  _geom_angle
  _geom_angle_site_symmetry_1
  _geom_angle_site_symmetry_3
  _geom_angle_publ_flag
 C25 O6 C31 114.5(3) . . ?
 C15 O3 C9 108.4(3) . . ?
 C15 O3 Na1 127.5(3) . 4_456 ?
 C9 O3 Na1 113.8(3) . 4_456 ?
 C22 O5 H5 109.5 . . ?
 C19 O4 Na1 135.3(3) . 4_456 ?
 C33 O7 Na1 134.7(3) . . ?
 C8 O2 C4 115.0(4) . . ?
 C8 O2 Na1 105.7(2) . 4_456 ?
 C4 O2 Na1 106.9(3) . 4_456 ?
 C37 O9 C35 106.8(4) . . ?
 C3 O1 H1 126(2) . . ?
 C3 O1 Na1 121.7(3) . 4_456 ?
 Na1 O1 H1 87(3) 4_456 . ?
 C35 O8 Na1 125.6(3) . . ?
 C19 C20 H20 109.1 . . ?
 C19 C20 C22 109.9(3) . . ?
 C22 C20 H20 109.1 . . ?
 C21 C20 H20 109.1 . . ?
 C21 C20 C19 110.4(4) . . ?
 C21 C20 C22 109.4(4) . . ?
 O6 C25 H25 108.7 . . ?
 O6 C25 C26 108.7(4) . . ?
 O6 C25 C23 106.0(3) . . ?
 C26 C25 H25 108.7 . . ?
 C23 C25 H25 108.7 . . ?
 C23 C25 C26 115.7(4) . . ?
 C31 C29 H29 107.6 . . ?
 C31 C29 C30 111.0(4) . . ?
 C28 C29 H29 107.6 . . ?
 C28 C29 C31 110.5(4) . . ?
 C28 C29 C30 112.4(4) . . ?
 C30 C29 H29 107.6 . . ?
 C25 C26 H26 107.6 . . ?
 C28 C26 C25 108.1(4) . . ?
 C28 C26 H26 107.6 . . ?
 C27 C26 C25 113.4(4) . . ?
 C27 C26 H26 107.6 . . ?
 C27 C26 C28 112.3(4) . . ?
 O6 C31 C29 109.6(4) . . ?
 O6 C31 H31 107.1 . . ?
 O6 C31 C32 111.5(4) . . ?
 C29 C31 H31 107.1 . . ?
 C29 C31 C32 114.0(4) . . ?
 C32 C31 H31 107.1 . . ?
 O7 C33 C32 119.6(4) . . ?
 O7 C33 C34 121.9(4) . . ?
 C34 C33 C32 118.5(4) . . ?
 O4 C19 C20 119.8(4) . . ?
 O4 C19 C16 120.8(4) . . ?
 C16 C19 C20 119.4(4) . . ?
 C31 C32 H32A 109.4 . . ?
 C31 C32 H32B 109.4 . . ?
 C33 C32 C31 111.3(4) . . ?
 C33 C32 H32A 109.4 . . ?
 C33 C32 H32B 109.4 . . ?
 H32A C32 H32B 108.0 . . ?
 O1 C3 C6 110.3(4) . . ?
 O1 C3 C2 109.5(4) . . ?
 O1 C3 C4 103.1(4) . . ?
 C6 C3 C2 111.1(4) . . ?
 C6 C3 C4 109.5(4) . . ?
 C2 C3 C4 113.0(4) . . ?
 O10 C36 C34 132.3(5) . . ?
 O10 C36 C37 122.5(5) . . ?
 C34 C36 C37 105.1(4) . . ?
 H12A C12 H12B 108.8 . . ?
 C9 C12 H12A 110.6 . . ?
 C9 C12 H12B 110.6 . . ?
 C9 C12 C13 105.6(4) . . ?
 C13 C12 H12A 110.6 . . ?
 C13 C12 H12B 110.6 . . ?
 C36 C34 C33 128.0(4) . . ?
 C36 C34 C35 108.4(4) . . ?
 C35 C34 C33 123.4(4) . . ?
 O3 C15 H15 108.1 . . ?
 O3 C15 C16 109.7(4) . . ?
 O3 C15 C13 104.7(4) . . ?
 C16 C15 H15 108.1 . . ?
 C16 C15 C13 117.7(4) . . ?
 C13 C15 H15 108.1 . . ?
 C25 C23 H23 107.8 . . ?
 C25 C23 C22 110.2(4) . . ?
 C25 C23 C24 110.7(4) . . ?
 C22 C23 H23 107.8 . . ?
 C24 C23 H23 107.8 . . ?
 C24 C23 C22 112.4(4) . . ?
 C3 C6 H6A 109.5 . . ?
 C3 C6 H6B 109.5 . . ?
 H6A C6 H6B 108.0 . . ?
 C7 C6 C3 110.9(4) . . ?
 C7 C6 H6A 109.5 . . ?
 C7 C6 H6B 109.5 . . ?
 O5 C22 C20 106.9(3) . . ?
 O5 C22 C23 110.8(4) . . ?
 O5 C22 H22 107.7 . . ?
 C20 C22 H22 107.7 . . ?
 C23 C22 C20 115.6(4) . . ?
 C23 C22 H22 107.7 . . ?
 H17A C17 H17B 107.6 . . ?
 C16 C17 H17A 108.6 . . ?
 C16 C17 H17B 108.6 . . ?
 C18 C17 H17A 108.6 . . ?
 C18 C17 H17B 108.6 . . ?
 C18 C17 C16 114.5(4) . . ?
 C19 C16 C15 110.7(4) . . ?
 C19 C16 C17 110.1(4) . . ?
 C19 C16 H16 107.9 . . ?
 C15 C16 C17 112.2(4) . . ?
 C15 C16 H16 107.9 . . ?
 C17 C16 H16 107.9 . . ?
 O3 C9 C12 105.2(4) . . ?
 O3 C9 C8 106.3(4) . . ?
 O3 C9 C10 105.0(4) . . ?
 C12 C9 C8 113.4(4) . . ?
 C10 C9 C12 112.2(4) . . ?
 C10 C9 C8 113.8(4) . . ?
 O9 C35 C34 109.5(4) . . ?
 O8 C35 O9 116.7(4) . . ?
 O8 C35 C34 133.8(5) . . ?
 C29 C28 C26 112.5(4) . . ?
 C29 C28 H28A 109.1 . . ?
 C29 C28 H28B 109.1 . . ?
 C26 C28 H28A 109.1 . . ?
 C26 C28 H28B 109.1 . . ?
 H28A C28 H28B 107.8 . . ?
 C12 C13 H13 109.5 . . ?
 C15 C13 C12 100.0(4) . . ?
 C15 C13 H13 109.5 . . ?
 C14 C13 C12 113.2(4) . . ?
 C14 C13 C15 114.6(4) . . ?
 C14 C13 H13 109.5 . . ?
 O9 C37 C36 110.1(4) . . ?
 C38 C37 O9 122.9(5) . . ?
 C38 C37 C36 126.9(5) . . ?
 O2 C8 C9 104.8(4) . . ?
 O2 C8 H8 109.0 . . ?
 O2 C8 C7 110.7(4) . . ?
 C9 C8 H8 109.0 . . ?
 C7 C8 C9 114.3(4) . . ?
 C7 C8 H8 109.0 . . ?
 C6 C7 C8 112.6(4) . . ?
 C6 C7 H7A 109.1 . . ?
 C6 C7 H7B 109.1 . . ?
 C8 C7 H7A 109.1 . . ?
 C8 C7 H7B 109.1 . . ?
 H7A C7 H7B 107.8 . . ?
 C20 C21 H21A 109.5 . . ?
 C20 C21 H21B 109.5 . . ?
 C20 C21 H21C 109.5 . . ?
 H21A C21 H21B 109.5 . . ?
 H21A C21 H21C 109.5 . . ?
 H21B C21 H21C 109.5 . . ?
 C3 C2 H2A 108.3 . . ?
 C3 C2 H2B 108.3 . . ?
 H2A C2 H2B 107.4 . . ?
 C1 C2 C3 115.8(5) . . ?
 C1 C2 H2A 108.3 . . ?
 C1 C2 H2B 108.3 . . ?
 C17 C18 H18A 109.5 . . ?
 C17 C18 H18B 109.5 . . ?
 C17 C18 H18C 109.5 . . ?
 H18A C18 H18B 109.5 . . ?
 H18A C18 H18C 109.5 . . ?
 H18B C18 H18C 109.5 . . ?
 C26 C27 H27A 109.5 . . ?
 C26 C27 H27B 109.5 . . ?
 C26 C27 H27C 109.5 . . ?
 H27A C27 H27B 109.5 . . ?
 H27A C27 H27C 109.5 . . ?
 H27B C27 H27C 109.5 . . ?
 C2 C1 H1A 109.5 . . ?
 C2 C1 H1B 109.5 . . ?
 C2 C1 H1C 109.5 . . ?
 H1A C1 H1B 109.5 . . ?
 H1A C1 H1C 109.5 . . ?
 H1B C1 H1C 109.5 . . ?
 H5A C5 H5B 109.5 . . ?
 H5A C5 H5C 109.5 . . ?
 H5B C5 H5C 109.5 . . ?
 C4 C5 H5A 109.5 . . ?
 C4 C5 H5B 109.5 . . ?
 C4 C5 H5C 109.5 . . ?
 O2 C4 C3 109.4(4) . . ?
 O2 C4 C5 111.7(4) . . ?
 O2 C4 H4 107.0 . . ?
 C3 C4 H4 107.0 . . ?
 C5 C4 C3 114.4(4) . . ?
 C5 C4 H4 107.0 . . ?
 C13 C14 H14A 109.5 . . ?
 C13 C14 H14B 109.5 . . ?
 C13 C14 H14C 109.5 . . ?
 H14A C14 H14B 109.5 . . ?
 H14A C14 H14C 109.5 . . ?
 H14B C14 H14C 109.5 . . ?
 C9 C10 H10A 109.0 . . ?
 C9 C10 H10B 109.0 . . ?
 C9 C10 C11 112.8(4) . . ?
 H10A C10 H10B 107.8 . . ?
 C11 C10 H10A 109.0 . . ?
 C11 C10 H10B 109.0 . . ?
 C29 C30 H30A 109.5 . . ?
 C29 C30 H30B 109.5 . . ?
 C29 C30 H30C 109.5 . . ?
 H30A C30 H30B 109.5 . . ?
 H30A C30 H30C 109.5 . . ?
 H30B C30 H30C 109.5 . . ?
 C10 C11 H11A 109.5 . . ?
 C10 C11 H11B 109.5 . . ?
 C10 C11 H11C 109.5 . . ?
 H11A C11 H11B 109.5 . . ?
 H11A C11 H11C 109.5 . . ?
 H11B C11 H11C 109.5 . . ?
 C23 C24 H24A 109.5 . . ?
 C23 C24 H24B 109.5 . . ?
 C23 C24 H24C 109.5 . . ?
 H24A C24 H24B 109.5 . . ?
 H24A C24 H24C 109.5 . . ?
 H24B C24 H24C 109.5 . . ?
 Cl1 C38 H38 117.5 . . ?
 C37 C38 Cl1 125.0(5) . . ?
 C37 C38 H38 117.5 . . ?
 N1SO C2SO C1SO 178.4(9) . . ?
 C2SO C1SO H1SA 109.5 . . ?
 C2SO C1SO H1SB 109.5 . . ?
 C2SO C1SO H1SC 109.5 . . ?
 H1SA C1SO H1SB 109.5 . . ?
 H1SA C1SO H1SC 109.5 . . ?
 H1SB C1SO H1SC 109.5 . . ?
 O3 Na1 O4 71.84(11) 4_556 4_556 ?
 O3 Na1 O2 68.43(11) 4_556 4_556 ?
 O7 Na1 O3 111.73(12) . 4_556 ?
 O7 Na1 O4 74.27(11) . 4_556 ?
 O7 Na1 O2 152.78(13) . 4_556 ?
 O7 Na1 O1 131.44(13) . 4_556 ?
 O7 Na1 O8 76.43(12) . . ?
 O2 Na1 O4 127.73(12) 4_556 4_556 ?
 O1 Na1 O3 110.85(12) 4_556 4_556 ?
 O1 Na1 O4 98.21(12) 4_556 4_556 ?
 O1 Na1 O2 67.10(11) 4_556 4_556 ?
 O8 Na1 O3 118.48(13) . 4_556 ?
 O8 Na1 O4 150.64(13) . 4_556 ?
 O8 Na1 O2 80.01(12) . 4_556 ?
 O8 Na1 O1 102.46(13) . 4_556 ?
 H3SA C3SO H3SB 109.5 . . ?
 H3SA C3SO H3SC 109.5 . . ?
 H3SB C3SO H3SC 109.5 . . ?
 C4SO C3SO H3SA 109.5 . . ?
 C4SO C3SO H3SB 109.5 . . ?
 C4SO C3SO H3SC 109.5 . . ?
 N2SO C4SO C3SO 179.7(11) . . ?
 H1SD O1SO H1SO 104.5 . . ?

_olex2_date_sample_data_collection  2018-10-24
_olex2_submission_original_sample_id  20181024
_olex2_submission_special_instructions  'No special instructions were received'

# start Validation Reply Form
_vrf_THETM01_20181024_shao_0m
;
PROBLEM: The value of sine(theta_max)/wavelength is less than 0.575
RESPONSE: The long range order of crystal was the not good enough to  
give scattering out to more than 0.5568 sin(theta)/lambda. 
It is likely due to large number of degrees of freedom in  
the fragments that are around the sodium atoms. Hence, 
bond distances might be affected. However, the absolute 
positions of the atoms are not affected by this kind of disorder. 
;
# end Validation Reply Form
