# Supplementary material for: Expanding the antibacterial selectivity of polyether ionophore antibiotics through diversity-focused semisynthesis
Source: Springer Nature journal article supplement (doi:10.1038/s41557-020-00601-1), 2020-12-22
Supplement: 41557_2020_601_MOESM80_ESM.fcf [file 41557_2020_601_MOESM80_ESM.fcf]

#
# h,k,l, Fc-squared, Fo-squared, sigma(Fo-squared), status flag
#
data_20181024_shao_0m
_shelx_title ' 20181024_shao_0m_a.res in P2(1)2(1)2(1)'
_shelx_refln_list_code          4
_shelx_F_calc_maximum      267.11
_exptl_crystal_F_000      1792.00
_reflns_d_resolution_high  0.8980

loop_
 _space_group_symop_operation_xyz
 'x, y, z'
 '-x+1/2, -y, z+1/2'
 '-x, y+1/2, -z+1/2'
 'x+1/2, -y+1/2, -z'

_cell_length_a    11.9272
_cell_length_b    13.6163
_cell_length_c    27.7742
_cell_angle_alpha  90.000
_cell_angle_beta   90.000
_cell_angle_gamma  90.000

_shelx_F_squared_multiplier     1.000

loop_
 _refln_index_h
 _refln_index_k
 _refln_index_l
 _refln_F_squared_calc
 _refln_F_squared_meas
 _refln_F_squared_sigma
 _refln_observed_status
   2   0   0       5807.02       6549.81       116.63 o
   4   0   0      20019.37      18058.62       317.94 o
   6   0   0       1020.18       1050.81        35.15 o
   8   0   0        352.90        313.82        22.59 o
  10   0   0       2209.81       2239.98        84.83 o
  12   0   0        218.72        271.76        34.21 o
   2   1   0      60050.36      57836.08       896.62 o
   3   1   0      24147.85      23370.61       332.24 o
   4   1   0       4948.92       4807.59        74.13 o
   5   1   0        330.56        357.58        22.71 o
   6   1   0        923.81        979.36        31.57 o
   7   1   0        958.67        915.26        26.70 o
   8   1   0        229.64        227.43        15.69 o
   9   1   0        170.97        173.60        15.70 o
  10   1   0         32.10         34.23        13.50 o
  11   1   0        364.89        417.26        24.08 o
  12   1   0        647.23        700.44        34.46 o
  13   1   0        247.56        220.70        26.34 o
   0   2   0       3209.41       4390.92       117.10 o
   1   2   0       3111.56       3345.06       100.80 o
   2   2   0       7363.67       7560.16       136.02 o
   3   2   0          0.14         31.36        13.45 o
   4   2   0      12162.70      12191.98       218.22 o
   5   2   0         94.26         69.33        18.02 o
   6   2   0        407.53        501.01        18.15 o
   7   2   0        980.34       1026.32        26.36 o
   8   2   0       1735.81       1742.92        41.03 o
   9   2   0        916.89        907.42        33.93 o
  10   2   0        134.97        115.70        21.41 o
  11   2   0        384.85        380.16        28.90 o
  12   2   0          2.67         -3.32        14.30 o
  13   2   0        219.12        243.70        31.64 o
   1   3   0        805.90       1191.60        29.25 o
   2   3   0      17822.61      18237.89       369.45 o
   3   3   0       1836.89       1757.28        44.82 o
   4   3   0       1144.82       1187.85        40.65 o
   5   3   0        333.53        392.53        19.56 o
   6   3   0        874.69       1274.09        36.08 o
   7   3   0        755.73        654.74        23.74 o
   8   3   0       1455.25       1381.40        36.02 o
   9   3   0       1813.38       1729.43        43.11 o
  10   3   0        539.92        582.20        27.27 o
  11   3   0         16.01         -2.38        13.10 o
  12   3   0         28.49         10.33        15.72 o
   0   4   0       3948.54       3738.84       158.81 o
   1   4   0       6652.19       7670.78       140.30 o
   3   4   0        535.99        419.08        31.05 o
   4   4   0         71.38        906.27        97.05 o
   5   4   0        100.73        116.98        13.25 o
   6   4   0        321.51        448.94        29.29 o
   7   4   0        279.47        331.18        21.39 o
   9   4   0       1365.02       1253.16        36.93 o
  10   4   0       3711.72       3627.18        74.82 o
  11   4   0        242.84        227.09        21.06 o
  12   4   0         21.59        131.56        19.46 o
   1   5   0         54.15         42.51        15.25 o
   2   5   0         26.54         37.99        14.20 o
   3   5   0       1845.12       1898.97        48.88 o
   4   5   0         78.18        178.28        14.66 o
   5   5   0       5798.52       5573.45       110.59 o
   6   5   0       2714.75       2219.32        54.08 o
   7   5   0       1026.06        990.62        34.34 o
   8   5   0       1250.34       1097.77        37.78 o
   9   5   0        244.99        278.20        20.58 o
  10   5   0        297.71        308.47        22.15 o
  11   5   0        333.08        289.90        24.49 o
  12   5   0        221.78        207.56        28.47 o
   0   6   0        995.46        958.90        43.81 o
   1   6   0       1695.64       1864.92        49.17 o
   2   6   0         98.64         84.51        12.03 o
   3   6   0      19223.55      19899.70       410.55 o
   4   6   0       7752.41       7167.71       139.05 o
   5   6   0       1638.57       1469.66        41.41 o
   6   6   0       4281.65       4099.63        88.03 o
   7   6   0       4188.81       4260.14        92.01 o
   8   6   0       2109.20       1994.32        55.11 o
   9   6   0        230.72        289.69        24.09 o
  10   6   0       1474.37       1296.44        40.65 o
  11   6   0        426.49        520.57        30.36 o
  12   6   0        226.98        262.15        24.94 o
   1   7   0       5618.87       6234.83       126.61 o
   2   7   0       1871.44       2046.63        45.44 o
   3   7   0        140.62        152.92        13.19 o
   4   7   0         40.01         59.40        20.18 o
   5   7   0       1089.05       1095.25        36.19 o
   6   7   0       1921.37       1772.57        48.92 o
   7   7   0        817.72       1181.61        81.32 o
   8   7   0       2058.12       2147.49        59.23 o
   9   7   0         85.17        100.05        19.85 o
  10   7   0         71.37         54.03        25.05 o
  11   7   0         97.16        117.31        25.96 o
   0   8   0       2165.81       2296.64        80.84 o
   1   8   0       1484.62       1538.65        62.79 o
   2   8   0         16.22         26.69        12.33 o
   3   8   0         18.85         20.60        10.51 o
   4   8   0       1044.41       1051.87        37.71 o
   5   8   0        518.81        517.47        30.76 o
   6   8   0        160.88        224.69        20.50 o
   7   8   0          1.35         -8.43        14.45 o
   8   8   0        650.15        632.23        33.19 o
   9   8   0        655.17        691.64        38.81 o
  10   8   0         24.20         26.73        19.29 o
  11   8   0         34.48         20.31        20.18 o
   1   9   0       1021.80       1086.85        48.06 o
   2   9   0         47.48         73.63        15.83 o
   3   9   0        152.78        148.68        14.63 o
   4   9   0        477.75        559.22        32.58 o
   5   9   0        421.89        414.93        27.66 o
   6   9   0       2800.70       2739.11        70.27 o
   7   9   0       1108.67       1078.47        41.99 o
   8   9   0         51.61         61.20        19.60 o
   9   9   0         85.81        145.02        34.60 o
  10   9   0          9.01         10.14        18.99 o
   0  10   0        217.21        297.44        34.05 o
   1  10   0        366.56        440.63        32.98 o
   2  10   0        587.72        600.34        42.92 o
   3  10   0        256.63        262.28        23.11 o
   4  10   0        191.79        314.65        29.43 o
   5  10   0        192.21        239.71        24.54 o
   6  10   0       3281.99       3225.44        81.30 o
   7  10   0          0.19         12.09        19.41 o
   8  10   0        118.35        288.28        49.20 o
   9  10   0         18.93         14.14        31.22 o
   1  11   0        391.24        445.84        42.61 o
   2  11   0       1221.09       1303.52        52.15 o
   3  11   0        259.29        333.57        41.14 o
   4  11   0       1025.98       1024.81        43.58 o
   5  11   0         70.42         71.49        20.79 o
   6  11   0        446.56        511.93        53.86 o
   7  11   0        394.22        461.22        76.24 o
   8  11   0         20.88         15.62        21.43 o
   9  11   0        311.93        258.42        41.07 o
   0  12   0        145.92        127.37        31.41 o
   1  12   0        203.69        206.12        21.88 o
   2  12   0       1575.68       1579.25        94.14 o
   3  12   0          2.61         21.54        21.80 o
   4  12   0         72.27         50.41        26.51 o
   5  12   0        350.11        372.26        54.76 o
   6  12   0          2.68         -1.49        24.29 o
   7  12   0        849.26        783.94        56.80 o
   8  12   0         86.70        145.34        66.17 o
   1  13   0         28.29         20.02        16.72 o
   2  13   0       2236.13       2349.33        69.03 o
   3  13   0         35.05         65.81        32.80 o
   4  13   0        151.50        141.73        88.23 o
   5  13   0        229.46        205.33        50.71 o
   6  13   0         44.52         34.79        27.87 o
   0  14   0        306.30        426.84        78.37 o
   1  14   0        247.05        317.19        29.28 o
   2  14   0        209.14        217.31        22.18 o
   3  14   0        120.63        143.96        39.02 o
   4  14   0        409.26        568.05       105.20 o
   1  15   0          2.08         16.31        19.39 o
   2   0   1       6739.76       7228.27       104.39 o
   3   0   1       1341.21       1033.74        21.20 o
   4   0   1       6846.23       6576.55        91.48 o
   5   0   1        108.56        188.65        13.44 o
   6   0   1       6584.28       6846.21        97.77 o
   7   0   1       1667.56       1714.43        32.91 o
   8   0   1        964.17        933.81        25.30 o
   9   0   1        296.92        283.04        21.92 o
  10   0   1        167.49        216.13        20.53 o
  11   0   1        719.40        688.32        32.79 o
  12   0   1        728.00        784.15        36.71 o
  13   0   1         12.93         16.77        17.71 o
 -13   1   1        131.34        159.34        24.56 o
 -12   1   1        218.54        257.66        23.35 o
 -11   1   1        328.62        314.31        21.91 o
 -10   1   1        315.15        320.70        20.54 o
  -9   1   1        441.44        458.00        22.06 o
  -8   1   1        336.34        313.07        16.83 o
  -7   1   1       4203.14       4027.04        67.86 o
  -6   1   1       2419.45       2596.59        46.72 o
  -5   1   1       1307.73       1202.96        25.66 o
  -4   1   1       3601.73       3147.70        53.32 o
  -3   1   1        925.97       1060.15        34.87 o
  -2   1   1       4493.30       4498.75       129.35 o
  -1   1   1       4893.61       4917.60       257.22 o
   2   1   1       4475.39       4482.72       138.22 o
   3   1   1        920.57       1081.12        21.72 o
   4   1   1       3593.00       3168.74        51.96 o
   5   1   1       1312.86       1204.21        26.31 o
   6   1   1       2452.82       2630.03        47.68 o
   7   1   1       4208.11       4023.93        74.07 o
   8   1   1        345.45        353.28        18.94 o
   9   1   1        443.42        445.50        22.23 o
  10   1   1        324.67        299.62        20.30 o
  11   1   1        330.12        300.29        21.42 o
  12   1   1        217.63        261.23        21.48 o
  13   1   1        131.59        166.99        24.87 o
 -13   2   1         81.66         71.32        18.50 o
 -12   2   1         67.82         76.54        16.54 o
 -11   2   1        253.17        203.89        19.47 o
 -10   2   1        123.46        127.29        15.99 o
  -9   2   1       1785.57       1769.62        39.55 o
  -8   2   1        895.89        959.87        26.70 o
  -7   2   1       1442.66       1358.73        30.93 o
  -6   2   1        847.36        906.35        23.28 o
  -5   2   1       8698.21       8984.31       134.31 o
  -4   2   1        303.52        457.69        24.54 o
  -3   2   1       4756.73       4593.81        86.65 o
  -2   2   1      11327.38      11368.12       201.28 o
  -1   2   1      10652.67      10744.06       190.73 o
   0   2   1       1713.64       1688.65        66.68 o
   1   2   1      10688.43      11205.31       239.87 o
   2   2   1      11350.28      11325.63       230.64 o
   3   2   1       4732.10       4583.51        86.40 o
   4   2   1        293.81        412.38        20.74 o
   5   2   1       8703.20       8963.52       135.01 o
   6   2   1        838.84        869.27        25.35 o
   7   2   1       1447.55       1374.49        34.13 o
   8   2   1        899.53        952.13        29.17 o
   9   2   1       1779.44       1759.18        43.08 o
  10   2   1        126.79         97.58        23.61 o
  11   2   1        255.45        236.62        20.15 o
  12   2   1         67.31         73.97        17.13 o
  13   2   1         81.93         86.56        18.46 o
 -12   3   1         22.32         24.51        16.18 o
 -11   3   1        337.77        317.33        22.33 o
 -10   3   1       1255.11       1290.90        38.20 o
  -9   3   1        334.99        363.16        19.28 o
  -8   3   1       1384.30       1318.74        32.24 o
  -7   3   1         61.09         53.49        10.27 o
  -6   3   1       5867.80       5951.48       103.05 o
  -5   3   1        847.87        905.65        24.98 o
  -4   3   1        405.22        541.66        18.32 o
  -3   3   1       8463.01       8728.74       158.96 o
  -2   3   1       8531.53       8822.00       159.90 o
  -1   3   1      13536.20      14785.70       213.32 o
   0   3   1       7504.56       7844.15       168.49 o
   1   3   1      13509.85      15387.10       452.25 o
   2   3   1       8557.54       8647.57       179.76 o
   3   3   1       8458.30       8713.64       181.63 o
   4   3   1        427.91        556.38        21.17 o
   5   3   1        841.45        940.44        29.10 o
   6   3   1       5837.64       5956.01       103.39 o
   7   3   1         60.06         59.90        14.98 o
   8   3   1       1393.00       1236.80        34.04 o
   9   3   1        336.96        381.53        21.66 o
  10   3   1       1248.02       1272.94        44.77 o
  11   3   1        336.54        264.29        21.66 o
  12   3   1         22.30          3.56        14.80 o
 -12   4   1        488.65        503.43        30.17 o
 -11   4   1        596.44        584.97        32.78 o
 -10   4   1         89.94        168.53        17.82 o
  -9   4   1        540.36        586.73        26.24 o
  -8   4   1        220.13        204.16        16.39 o
  -7   4   1        672.03        668.73        28.60 o
  -6   4   1       5800.53       5384.25       106.97 o
  -5   4   1        509.33        411.45        20.42 o
  -4   4   1       3027.03       3393.91       110.89 o
  -3   4   1       2028.15       1934.89        45.06 o
  -2   4   1      49860.98      53050.83      1245.91 o
  -1   4   1       5923.02       6200.14       108.35 o
   0   4   1       1190.55       1432.33        37.66 o
   1   4   1       5909.34       6276.02       116.39 o
   2   4   1      49905.96      53279.64      1066.94 o
   3   4   1       2034.81       2032.72        51.99 o
   4   4   1       3020.28       3383.33        79.45 o
   5   4   1        510.83        394.60        20.51 o
   6   4   1       5784.41       5397.36       107.49 o
   7   4   1        665.94        688.88        25.39 o
   8   4   1        208.64        213.66        19.19 o
   9   4   1        540.94        617.80        39.04 o
  10   4   1         88.06        158.76        20.36 o
  11   4   1        593.88        595.08        29.41 o
  12   4   1        489.31        534.17        31.74 o
 -12   5   1        169.14        192.74        22.10 o
 -11   5   1         45.57         21.21        16.07 o
 -10   5   1        338.78        347.76        23.12 o
  -9   5   1        626.21        674.20        28.85 o
  -8   5   1         51.85         38.00        21.65 o
  -7   5   1        203.22        210.78        24.59 o
  -6   5   1         36.16         30.74        12.04 o
  -5   5   1         77.10        123.80        15.67 o
  -4   5   1       6534.52       6970.27       133.50 o
  -3   5   1       2048.64       2014.32        58.84 o
  -2   5   1       4718.84       4688.29        82.12 o
  -1   5   1       3263.72       3973.11        82.38 o
   0   5   1        713.47        692.72        31.50 o
   1   5   1       3279.80       4172.41       122.58 o
   2   5   1       4736.37       4898.69       111.64 o
   3   5   1       2040.62       2191.90        81.21 o
   4   5   1       6491.12       6796.83       172.41 o
   5   5   1         75.38        142.75        21.78 o
   6   5   1         38.62         45.53        12.90 o
   7   5   1        204.72        231.44        19.56 o
   8   5   1         55.25         78.13        15.58 o
   9   5   1        631.66        722.81        30.02 o
  10   5   1        348.57        313.29        23.86 o
  11   5   1         46.12         56.30        17.43 o
  12   5   1        168.15        212.82        24.11 o
 -12   6   1        289.95        337.60        26.76 o
 -11   6   1        264.91        283.41        24.44 o
 -10   6   1        103.84        122.90        19.74 o
  -9   6   1       2050.15       2014.72        56.52 o
  -8   6   1       3018.91       3000.73        71.86 o
  -7   6   1         21.34         42.03        15.79 o
  -6   6   1         53.07         93.73        14.99 o
  -5   6   1         77.07        141.70        20.18 o
  -4   6   1       1054.91       1221.88        36.92 o
  -3   6   1       2750.37       3094.95        79.52 o
  -2   6   1        715.61        798.48        30.30 o
  -1   6   1        588.50        713.42        30.07 o
   0   6   1        412.68        374.06        24.88 o
   1   6   1        586.38        707.00        47.41 o
   2   6   1        695.41        791.63        34.40 o
   3   6   1       2755.41       3179.05        80.02 o
   4   6   1       1038.49       1379.24        43.69 o
   5   6   1         78.71        155.44        24.98 o
   6   6   1         56.30         82.15        14.80 o
   7   6   1         22.24         44.79        14.19 o
   8   6   1       3000.19       2971.67        72.17 o
   9   6   1       2044.45       2025.54        57.29 o
  10   6   1        102.39         77.63        16.74 o
  11   6   1        262.91        276.89        25.03 o
  12   6   1        294.20        326.65        26.79 o
 -11   7   1        136.94        178.20        22.23 o
 -10   7   1        122.29        135.33        22.86 o
  -9   7   1        571.95        598.70        47.61 o
  -8   7   1       3656.38       3653.40        84.84 o
  -7   7   1       3164.30       3372.07        87.40 o
  -6   7   1         13.24         30.38        15.09 o
  -5   7   1        328.95        389.54        23.37 o
  -4   7   1       4282.10       4277.34        91.07 o
  -3   7   1        227.55        184.73        13.89 o
  -2   7   1         45.43         54.30        10.41 o
  -1   7   1        465.31        607.73        29.58 o
   0   7   1       3580.75       3664.56        82.78 o
   1   7   1        460.78        524.80        52.26 o
   2   7   1         44.68         75.80        17.37 o
   3   7   1        226.64        182.08        19.86 o
   4   7   1       4311.14       4276.79       103.34 o
   5   7   1        324.65        352.35        22.58 o
   6   7   1         15.54        -10.31        12.18 o
   7   7   1       3167.02       3201.22        75.96 o
   8   7   1       3648.71       3689.03        85.83 o
   9   7   1        566.57        609.81        33.67 o
  10   7   1        114.77        107.99        19.91 o
  11   7   1        137.75        149.70        21.68 o
 -11   8   1        124.58         97.01        26.56 o
 -10   8   1        178.83        185.72        25.04 o
  -9   8   1          7.51          3.31        17.72 o
  -8   8   1        197.99        159.85        29.39 o
  -7   8   1        450.47        407.71        28.02 o
  -6   8   1        620.46        671.00        31.82 o
  -5   8   1        491.43        472.10        38.20 o
  -4   8   1       1042.37       1027.29        37.24 o
  -3   8   1        960.66       1031.31        42.69 o
  -2   8   1        762.73        913.73        33.98 o
  -1   8   1        735.83        700.30        33.44 o
   0   8   1         18.04         31.47        18.51 o
   1   8   1        739.68        666.03        34.95 o
   2   8   1        739.80        824.05        27.54 o
   3   8   1        968.67        944.13        41.05 o
   4   8   1       1055.85       1086.42        42.96 o
   5   8   1        491.18        487.68        27.81 o
   6   8   1        616.76        687.35        32.63 o
   7   8   1        448.90        406.96        26.70 o
   8   8   1        205.29        185.99        23.61 o
   9   8   1          7.92          7.07        30.65 o
  10   8   1        176.66        155.66        31.89 o
  11   8   1        125.75        130.63        22.71 o
 -10   9   1        222.64        217.58        30.14 o
  -9   9   1          0.69         57.25        26.84 o
  -8   9   1         74.24         84.87        21.76 o
  -7   9   1        129.48        137.72        20.07 o
  -6   9   1        453.65        527.41        31.84 o
  -5   9   1        547.11        617.06        32.81 o
  -4   9   1       3084.83       3099.63        71.20 o
  -3   9   1          7.35         11.60        11.05 o
  -2   9   1        323.61        326.63        36.67 o
  -1   9   1       1627.95       1798.01        48.32 o
   0   9   1       5015.48       5516.91       114.58 o
   1   9   1       1618.09       1911.61        61.79 o
   2   9   1        320.53        371.01        25.40 o
   3   9   1          7.22         41.31        23.61 o
   4   9   1       3107.86       3084.00        75.88 o
   5   9   1        552.09        601.28        52.21 o
   6   9   1        449.36        506.28        31.54 o
   7   9   1        126.87        111.96        19.83 o
   8   9   1         77.99        107.51        21.32 o
   9   9   1          0.73          7.14        18.28 o
  10   9   1        216.25        208.15        26.59 o
  -9  10   1         26.91         54.36        35.98 o
  -8  10   1       2332.41       2408.66        74.35 o
  -7  10   1        508.65        486.59        32.25 o
  -6  10   1        357.29        419.32        29.23 o
  -5  10   1       1098.40       1098.12        41.39 o
  -4  10   1       1590.31       1566.31        48.52 o
  -3  10   1        721.92        794.34        39.26 o
  -2  10   1        641.09        652.28        36.18 o
  -1  10   1        507.36        494.36        41.06 o
   0  10   1       1564.50       1744.51        87.31 o
   1  10   1        507.83        512.75        29.23 o
   2  10   1        659.46        704.85        66.14 o
   3  10   1        724.56        747.94        62.19 o
   4  10   1       1595.09       1599.11        54.60 o
   5  10   1       1100.32       1131.09        45.40 o
   6  10   1        357.23        504.41        36.24 o
   7  10   1        504.68        403.73        31.90 o
   8  10   1       2335.11       2452.24        75.45 o
   9  10   1         27.21         49.94        21.72 o
  -9  11   1         27.21         36.62        68.21 o
  -8  11   1        139.10        113.45        23.35 o
  -7  11   1        308.19        241.57        28.29 o
  -6  11   1        236.49        287.15        26.85 o
  -5  11   1         46.35         58.99        20.18 o
  -4  11   1       1192.96       1207.10        45.81 o
  -3  11   1         42.27         39.01        16.85 o
  -2  11   1        678.53        685.13        34.17 o
  -1  11   1        862.10        934.97        40.36 o
   0  11   1        649.01        585.25        31.30 o
   1  11   1        863.86        930.50        35.63 o
   2  11   1        673.66        696.91        39.56 o
   3  11   1         41.52         45.83        28.15 o
   4  11   1       1182.69       1202.74        45.84 o
   5  11   1         47.66         24.60        19.73 o
   6  11   1        235.35        284.84        37.22 o
   7  11   1        309.34        297.49        31.24 o
   8  11   1        138.83        153.16        31.73 o
   9  11   1         27.75         25.35        42.77 o
  -8  12   1        196.75        301.76        97.39 o
  -7  12   1         26.04         61.11        36.96 o
  -6  12   1        132.41        163.44        26.67 o
  -5  12   1        256.67        309.65        30.79 o
  -4  12   1         83.96        127.55        29.88 o
  -3  12   1        286.94        269.38        24.29 o
  -2  12   1        588.59        622.63        38.51 o
  -1  12   1        908.57        910.70        37.74 o
   0  12   1         95.57         84.55        19.22 o
   1  12   1        915.56        946.63        37.57 o
   2  12   1        592.47        600.19        33.62 o
   3  12   1        284.05        227.79        37.74 o
   4  12   1         87.76        136.76        30.39 o
   5  12   1        258.36        307.39        31.38 o
   6  12   1        130.41        184.01        27.55 o
   7  12   1         26.73         45.99        25.11 o
   8  12   1        201.02        213.78        57.01 o
  -6  13   1        142.06        132.57        31.37 o
  -5  13   1         69.11        147.37        46.30 o
  -4  13   1        649.66        779.71        63.34 o
  -3  13   1        332.25        271.94        26.73 o
  -2  13   1        161.09        168.87        36.44 o
  -1  13   1        650.01        662.26        35.13 o
   0  13   1       1508.26       1650.99        50.08 o
   1  13   1        654.04        650.74        49.01 o
   2  13   1        163.76        168.62        18.31 o
   3  13   1        329.90        254.10        36.15 o
   4  13   1        651.78        748.22        73.53 o
   5  13   1         68.58        123.46        29.59 o
   6  13   1        139.87        171.24        33.37 o
  -5  14   1         38.48         71.94       102.48 o
  -4  14   1        567.49        544.98        92.30 o
  -3  14   1         16.32         -3.60        45.13 o
  -2  14   1        119.00         78.60        21.91 o
  -1  14   1        144.72        160.58        25.48 o
   0  14   1          0.22          4.18        17.15 o
   1  14   1        143.01        135.49        21.53 o
   2  14   1        115.90         96.60        26.31 o
   3  14   1         17.27        -40.72        40.72 o
  -1  15   1        296.39        292.76        31.64 o
   0  15   1        186.59        198.67        24.91 o
   1  15   1        295.72        287.13        32.42 o
   2   0   2       5111.22       4652.04        78.69 o
   3   0   2      27367.67      24036.87       571.54 o
   4   0   2       7736.31       7428.50       102.47 o
   5   0   2         39.06         63.02         7.62 o
   6   0   2       5418.31       5552.74        81.04 o
   7   0   2        299.65        307.61        14.15 o
   8   0   2        239.47        327.84        17.11 o
   9   0   2        236.27        252.84        16.71 o
  10   0   2        197.24        175.97        17.72 o
  11   0   2          0.05         20.03        15.52 o
  12   0   2        226.59        202.00        22.47 o
  13   0   2         91.47         61.44        21.36 o
 -13   1   2         75.66        124.78        23.36 o
 -12   1   2       1184.28       1245.69        44.74 o
 -11   1   2        720.60        666.58        32.63 o
 -10   1   2        722.20        764.91        31.35 o
  -9   1   2        134.81        169.34        21.40 o
  -8   1   2        424.31        417.80        18.58 o
  -7   1   2        413.12        481.16        18.39 o
  -6   1   2        942.07        878.07        23.21 o
  -5   1   2       4380.72       4203.01        67.21 o
  -4   1   2       1511.37       1412.51        26.92 o
  -3   1   2       3023.70       2529.39        50.65 o
  -2   1   2       2984.62       3111.39        58.60 o
  -1   1   2       1256.32       1065.61        22.01 o
   1   1   2       1270.96        989.87        25.15 o
   2   1   2       2919.51       3104.01        63.29 o
   3   1   2       3031.35       2518.92        44.98 o
   4   1   2       1530.95       1420.36        29.91 o
   5   1   2       4381.94       4258.59        68.84 o
   6   1   2        926.65        854.01        23.41 o
   7   1   2        424.32        460.33        19.63 o
   8   1   2        411.05        417.44        18.93 o
   9   1   2        133.20        117.97        14.54 o
  10   1   2        723.95        746.62        35.03 o
  11   1   2        713.91        720.62        30.25 o
  12   1   2       1189.06       1337.54        41.63 o
  13   1   2         76.53        121.82        28.99 o
 -13   2   2         67.03         61.98        17.81 o
 -12   2   2        155.98        168.24        25.05 o
 -11   2   2        173.94        211.52        21.20 o
 -10   2   2         24.31         11.55        11.82 o
  -9   2   2         69.75         71.70        12.33 o
  -8   2   2       1225.12       1205.99        43.45 o
  -7   2   2        100.94        118.47        14.27 o
  -6   2   2       1779.99       1780.95        35.14 o
  -5   2   2       1956.94       1780.70        37.59 o
  -4   2   2       1451.12       1419.21        41.93 o
  -3   2   2        520.70        349.61        15.46 o
  -2   2   2      16256.67      15533.24       314.11 o
  -1   2   2      22205.45      21644.02       337.25 o
   0   2   2         36.89         23.79         5.14 o
   1   2   2      22272.95      21834.81       380.55 o
   2   2   2      16252.33      15449.72       271.62 o
   3   2   2        517.97        335.87        21.26 o
   4   2   2       1462.37       1497.22        36.11 o
   5   2   2       1952.93       1827.10        35.90 o
   6   2   2       1805.03       1781.74        36.40 o
   7   2   2        102.29        100.05        15.43 o
   8   2   2       1218.46       1223.86        43.93 o
   9   2   2         66.73         91.47        20.07 o
  10   2   2         25.87         11.50        12.96 o
  11   2   2        172.72        156.05        18.39 o
  12   2   2        157.26        197.48        21.11 o
  13   2   2         67.12        107.35        24.59 o
 -12   3   2          4.18          0.09        17.07 o
 -11   3   2        174.92        197.33        18.97 o
 -10   3   2        586.27        591.60        24.69 o
  -9   3   2        364.61        411.00        20.36 o
  -8   3   2        147.29        161.80        15.52 o
  -7   3   2       1395.03       1170.84        28.42 o
  -6   3   2        635.78        707.58        23.32 o
  -5   3   2       1481.71       1645.33        43.89 o
  -4   3   2        996.54       1021.00        29.45 o
  -3   3   2       2702.61       2635.18        55.23 o
  -2   3   2      13666.61      14191.40       251.91 o
  -1   3   2      22209.28      24794.75       388.05 o
   0   3   2         57.00         13.88        11.66 o
   1   3   2      22262.35      23988.38       419.73 o
   2   3   2      13613.17      14030.55       249.11 o
   3   3   2       2723.56       2630.27        87.41 o
   4   3   2       1011.52       1072.42        29.84 o
   5   3   2       1487.02       1629.98        37.51 o
   6   3   2        652.46        749.22        41.06 o
   7   3   2       1382.26       1188.74        31.93 o
   8   3   2        140.53        155.09        16.46 o
   9   3   2        366.00        400.72        22.82 o
  10   3   2        589.77        600.31        27.80 o
  11   3   2        176.15        176.82        25.69 o
  12   3   2          3.44         20.92        15.03 o
 -12   4   2          2.22         80.18        23.61 o
 -11   4   2         33.10        100.38        16.38 o
 -10   4   2        867.70        893.83        38.48 o
  -9   4   2         28.76         25.60        11.68 o
  -8   4   2        355.29        442.53        19.93 o
  -7   4   2        809.27        755.86        25.85 o
  -6   4   2        344.53        404.05        42.58 o
  -5   4   2        454.17        444.86        21.83 o
  -4   4   2       4179.60       4422.22        90.02 o
  -3   4   2       5769.73       6424.58       121.88 o
  -2   4   2       2415.33       2447.36        93.27 o
  -1   4   2       1049.39       1016.64        48.25 o
   0   4   2       1606.00       1759.57        50.22 o
   1   4   2       1034.94        994.10        37.99 o
   2   4   2       2431.97       2905.60       185.60 o
   3   4   2       5761.82       6276.84       136.04 o
   4   4   2       4132.37       4366.07        98.98 o
   5   4   2        464.79        449.30        24.06 o
   6   4   2        340.54        373.51        21.40 o
   7   4   2        810.75        749.17        26.35 o
   8   4   2        346.02        428.39        22.15 o
   9   4   2         30.65         48.88        13.93 o
  10   4   2        853.35        897.92        34.00 o
  11   4   2         32.06         57.70        15.98 o
  12   4   2          2.26         13.97        15.98 o
 -12   5   2        117.53        116.69        22.35 o
 -11   5   2         64.98         74.97        21.94 o
 -10   5   2         58.81         64.48        15.52 o
  -9   5   2        658.38        644.16        28.70 o
  -8   5   2        673.50        641.58        29.79 o
  -7   5   2        278.36        272.68        20.36 o
  -6   5   2        144.42        143.72        13.32 o
  -5   5   2       1577.38       1728.70        45.28 o
  -4   5   2        699.89        629.50        30.96 o
  -3   5   2       2401.33       2444.45        88.55 o
  -2   5   2       2295.49       2724.22        51.70 o
  -1   5   2        731.18        622.87        23.23 o
   0   5   2       2491.89       2296.56        52.05 o
   1   5   2        735.48        657.29        32.71 o
   2   5   2       2338.38       3014.54       122.18 o
   3   5   2       2405.47       2370.38        61.55 o
   4   5   2        705.52        663.45        28.16 o
   5   5   2       1581.36       1839.65        67.88 o
   6   5   2        149.31        124.00        15.48 o
   7   5   2        269.42        253.62        20.21 o
   8   5   2        687.84        699.90        28.48 o
   9   5   2        656.53        673.31        29.51 o
  10   5   2         57.08         71.62        15.86 o
  11   5   2         66.84         76.84        17.58 o
  12   5   2        121.48        105.54        20.21 o
 -12   6   2        266.92        247.61        31.74 o
 -11   6   2         57.06         53.93        26.06 o
 -10   6   2       1117.38       1163.40        39.59 o
  -9   6   2        397.45        418.75        27.18 o
  -8   6   2       1075.22       1085.11        42.39 o
  -7   6   2       1732.23       1700.25        58.23 o
  -6   6   2        703.98        687.61        24.88 o
  -5   6   2        850.31        810.43        49.18 o
  -4   6   2       5060.09       5129.44       104.86 o
  -3   6   2       5674.97       5967.09        96.20 o
  -2   6   2      12568.01      13028.51       194.91 o
  -1   6   2       3580.60       3671.97        71.72 o
   0   6   2       1766.78       1656.72        41.44 o
   1   6   2       3570.78       3639.89       148.26 o
   2   6   2      12551.55      12901.50       273.62 o
   3   6   2       5693.39       5878.27       133.30 o
   4   6   2       5048.74       5183.85       137.12 o
   5   6   2        862.46        818.20        33.09 o
   6   6   2        696.56        694.86        30.07 o
   7   6   2       1726.94       1620.39        46.71 o
   8   6   2       1070.55       1208.48        43.20 o
   9   6   2        398.23        410.28        25.23 o
  10   6   2       1131.89       1207.57        40.13 o
  11   6   2         56.63         58.97        18.23 o
  12   6   2        266.76        243.50        25.09 o
 -11   7   2         94.55         63.78        18.32 o
 -10   7   2         11.12         15.99        23.76 o
  -9   7   2        878.53        930.85        38.32 o
  -8   7   2       1025.44       1176.24        50.64 o
  -7   7   2        193.67        233.80        24.39 o
  -6   7   2        239.50        273.03        25.57 o
  -5   7   2       1104.42       1063.73        30.19 o
  -4   7   2        375.34        364.07        18.43 o
  -3   7   2        820.29        843.08        32.75 o
  -2   7   2       1614.20       1700.42        42.39 o
  -1   7   2        242.29        315.23        26.37 o
   0   7   2       1648.62       1767.49        44.57 o
   1   7   2        245.52        267.44        18.40 o
   2   7   2       1583.11       1653.71        53.63 o
   3   7   2        816.91        817.78        35.72 o
   4   7   2        385.47        400.48        51.98 o
   5   7   2       1101.95       1114.27        40.48 o
   6   7   2        233.42        200.10        19.15 o
   7   7   2        195.67        244.80        22.05 o
   8   7   2       1013.60       1139.77        57.50 o
   9   7   2        877.03        909.41        39.49 o
  10   7   2         11.74         31.25        17.53 o
  11   7   2         96.93        107.64        21.63 o
 -11   8   2        114.24         88.51        22.95 o
 -10   8   2         34.51         75.79        28.21 o
  -9   8   2        114.21        113.36        25.60 o
  -8   8   2         27.33         29.00        19.79 o
  -7   8   2        649.43        573.00        30.60 o
  -6   8   2       1211.29       1243.12        54.88 o
  -5   8   2        827.36        747.48        51.92 o
  -4   8   2        688.60        754.33        32.98 o
  -3   8   2        458.56        527.83        24.25 o
  -2   8   2       1347.82       1436.73        40.52 o
  -1   8   2       2144.61       2156.50        52.11 o
   0   8   2       1958.71       2175.04        46.63 o
   1   8   2       2145.93       2102.60        78.66 o
   2   8   2       1355.20       1377.70        58.34 o
   3   8   2        456.98        561.55        63.73 o
   4   8   2        676.94        861.85        39.37 o
   5   8   2        834.61        777.83        37.02 o
   6   8   2       1214.11       1190.14        41.61 o
   7   8   2        653.37        634.70        33.34 o
   8   8   2         29.55         41.25        16.80 o
   9   8   2        110.56         66.76        20.72 o
  10   8   2         31.64         33.13        27.16 o
  11   8   2        114.86         91.31        33.35 o
 -10   9   2         17.86         -7.05        20.54 o
  -9   9   2        103.45         96.21        26.36 o
  -8   9   2        505.17        482.78        54.81 o
  -7   9   2        110.86        170.29        22.92 o
  -6   9   2       1503.36       1411.18        46.13 o
  -5   9   2       2363.01       2335.11        57.88 o
  -4   9   2        655.59        777.15        34.95 o
  -3   9   2        205.91        252.11        17.34 o
  -2   9   2        916.11        969.41        35.29 o
  -1   9   2        261.78        277.30        22.45 o
   0   9   2        764.13        687.77        59.48 o
   1   9   2        262.60        289.19        22.63 o
   2   9   2        945.76       1075.68        67.34 o
   3   9   2        207.74        252.84        26.92 o
   4   9   2        644.46        763.14        40.78 o
   5   9   2       2361.77       2296.83        62.63 o
   6   9   2       1496.30       1467.47        48.80 o
   7   9   2        113.38        181.06        31.10 o
   8   9   2        516.82        523.70        34.77 o
   9   9   2        102.40         89.39        21.75 o
  10   9   2         18.31          4.53        18.80 o
  -9  10   2        683.51        670.67        73.87 o
  -8  10   2        212.94        307.53        45.47 o
  -7  10   2        155.70        149.47        21.74 o
  -6  10   2       1789.51       1833.47        97.09 o
  -5  10   2        270.25        236.38        32.73 o
  -4  10   2        469.13        569.51        27.06 o
  -3  10   2        664.29        755.12        34.26 o
  -2  10   2        798.36        908.50        44.09 o
  -1  10   2         43.88         86.50        18.85 o
   0  10   2       1856.71       2157.33        52.92 o
   1  10   2         42.33         55.65        15.01 o
   2  10   2        795.37        878.61        40.39 o
   3  10   2        660.14        705.80        43.02 o
   4  10   2        456.94        575.66        40.31 o
   5  10   2        264.05        261.37        25.90 o
   6  10   2       1798.12       1918.65       109.72 o
   7  10   2        155.03        141.25        24.72 o
   8  10   2        209.90        196.60        41.38 o
   9  10   2        688.43        713.81        59.38 o
  -9  11   2        581.75        532.08        71.26 o
  -8  11   2        364.20        309.36        29.90 o
  -7  11   2        151.28        131.86        23.61 o
  -6  11   2         89.58         58.85        19.82 o
  -5  11   2        399.81        448.31        30.47 o
  -4  11   2       1239.86       1094.61        41.75 o
  -3  11   2       1696.63       1601.81        49.25 o
  -2  11   2        612.02        677.94        34.08 o
  -1  11   2        109.66         93.96        22.01 o
   0  11   2        257.36        270.37        23.51 o
   1  11   2        106.85        136.71        18.28 o
   2  11   2        602.28        687.12        47.41 o
   3  11   2       1691.63       1711.98        92.96 o
   4  11   2       1243.74       1150.26        56.06 o
   5  11   2        400.02        442.75        42.22 o
   6  11   2         91.45        101.34        25.11 o
   7  11   2        155.75        122.70        25.29 o
   8  11   2        356.27        253.78        38.06 o
   9  11   2        585.62        542.34        39.31 o
  -8  12   2         18.09         13.51        36.17 o
  -7  12   2        656.15        668.98        46.34 o
  -6  12   2        336.29        305.03        44.88 o
  -5  12   2        504.64        472.84        32.73 o
  -4  12   2        736.72        751.79        37.39 o
  -3  12   2       1024.81        920.29        40.79 o
  -2  12   2        136.07        111.16        20.75 o
  -1  12   2        213.48        265.16        23.57 o
   0  12   2        204.65        180.61        21.59 o
   1  12   2        207.52        214.95        21.45 o
   2  12   2        138.07         99.72        18.50 o
   3  12   2       1025.42        901.36        76.75 o
   4  12   2        744.90        761.73        88.88 o
   5  12   2        501.52        437.33        41.24 o
   6  12   2        337.42        385.44        42.40 o
   7  12   2        656.59        655.10        49.87 o
   8  12   2         19.27         88.78        39.62 o
  -6  13   2         81.67        125.30        48.53 o
  -5  13   2        845.88        769.05        75.72 o
  -4  13   2         12.03        123.40        50.58 o
  -3  13   2        245.70        248.24        26.78 o
  -2  13   2        791.61        815.71        42.80 o
  -1  13   2         86.38         91.02        19.77 o
   0  13   2        218.21        274.27        24.71 o
   1  13   2         85.95         99.45        28.82 o
   2  13   2        782.84        841.28        45.14 o
   3  13   2        246.35        254.03        40.97 o
   4  13   2         11.08         31.56        39.73 o
   5  13   2        845.11        818.58        56.20 o
   6  13   2         78.34        108.72        31.37 o
  -4  14   2        614.37        559.23        89.59 o
  -3  14   2        108.79        111.09        35.14 o
  -2  14   2         70.42         64.73        20.57 o
  -1  14   2        182.82        164.49        24.07 o
   0  14   2        779.52        870.09        55.99 o
   1  14   2        178.19        138.40        21.81 o
   2  14   2         71.96         71.77        24.83 o
   3  14   2        106.96         76.69        48.86 o
  -1  15   2        122.19         93.24        28.12 o
   0  15   2         45.92         -0.06        22.07 o
   1  15   2        120.72         95.38        30.33 o
   1   0   3      44668.73      41006.46       716.67 o
   2   0   3      16554.36      18881.70       329.24 o
   3   0   3        105.74        113.08        10.29 o
   4   0   3       4674.33       4302.42        73.74 o
   5   0   3        535.35        436.61        15.49 o
   6   0   3       1050.28        943.89        24.32 o
   7   0   3        985.20       1332.61        30.84 o
   8   0   3         22.65         29.35         9.88 o
   9   0   3       2302.74       2107.72        44.74 o
  10   0   3          2.70         12.48        12.66 o
  11   0   3         13.68          9.92        14.04 o
  12   0   3          3.37         23.08        16.85 o
  13   0   3         14.43         27.19        20.14 o
 -13   1   3        173.80        194.75        27.84 o
 -12   1   3        203.71        174.06        21.23 o
 -11   1   3       2360.36       2259.59        55.03 o
 -10   1   3        383.81        393.54        32.68 o
  -9   1   3        314.26        279.79        17.25 o
  -8   1   3        233.07        258.21        16.04 o
  -7   1   3        462.95        540.39        19.30 o
  -6   1   3       3915.55       4165.81        63.13 o
  -5   1   3       7171.24       6460.65        91.30 o
  -4   1   3       2121.90       1929.80        33.84 o
  -3   1   3       4608.08       4858.77        80.70 o
  -2   1   3       1669.29       1382.41        29.45 o
  -1   1   3       3174.93       3043.39        56.15 o
   0   1   3       5001.43       5865.69       156.95 o
   1   1   3       3125.74       2942.73        62.80 o
   2   1   3       1660.69       1375.36        31.05 o
   3   1   3       4587.37       4847.66        86.04 o
   4   1   3       2079.82       1925.20        41.85 o
   5   1   3       7161.95       6486.70       108.90 o
   6   1   3       3951.39       4176.65        69.34 o
   7   1   3        460.56        523.20        19.71 o
   8   1   3        240.60        273.29        16.09 o
   9   1   3        314.30        289.45        17.60 o
  10   1   3        382.93        332.58        21.23 o
  11   1   3       2352.63       2263.10        54.05 o
  12   1   3        204.24        207.38        20.03 o
  13   1   3        175.28        257.83        50.09 o
 -13   2   3        165.75        197.43        25.51 o
 -12   2   3        184.28        267.27        23.20 o
 -11   2   3        180.18        168.56        16.91 o
 -10   2   3        159.19        167.31        15.63 o
  -9   2   3        198.73        173.58        18.89 o
  -8   2   3        935.05        933.46        28.17 o
  -7   2   3       1798.94       1768.75        36.37 o
  -6   2   3        353.85        410.35        16.24 o
  -5   2   3        100.45        166.13        13.03 o
  -4   2   3      13394.50      13608.36       242.64 o
  -3   2   3       5646.16       5012.96        93.89 o
  -2   2   3      10219.88       8433.54       197.47 o
  -1   2   3       1164.90       1416.50        31.19 o
   0   2   3       2430.55       2301.80        40.22 o
   1   2   3       1178.27       1397.07        31.21 o
   2   2   3      10264.68       8475.72       152.15 o
   3   2   3       5683.25       5095.23        95.68 o
   4   2   3      13338.91      13927.67       222.01 o
   5   2   3        101.23        156.43        12.14 o
   6   2   3        347.77        403.26        17.54 o
   7   2   3       1815.55       1818.60        38.67 o
   8   2   3        938.54        954.60        27.75 o
   9   2   3        202.33        190.73        16.06 o
  10   2   3        159.90        161.70        17.65 o
  11   2   3        181.66        170.87        18.97 o
  12   2   3        186.47        250.20        24.84 o
  13   2   3        166.22        184.03        31.21 o
 -12   3   3         84.00        118.01        18.45 o
 -11   3   3       1291.18       1382.63        37.17 o
 -10   3   3        155.24        167.84        16.19 o
  -9   3   3        100.61         65.67        12.27 o
  -8   3   3       2510.94       2352.23        46.05 o
  -7   3   3        448.73        449.82        28.81 o
  -6   3   3       1902.99       1808.75        49.08 o
  -5   3   3        760.67        809.39        26.74 o
  -4   3   3       2512.33       2741.23        58.33 o
  -3   3   3       2162.03       2068.33        45.71 o
  -2   3   3      12809.66      13006.82       207.98 o
  -1   3   3       3406.00       3341.36        59.72 o
   0   3   3       3035.17       2696.00        72.10 o
   1   3   3       3377.45       3235.86        64.67 o
   2   3   3      12838.67      12432.11       222.05 o
   3   3   3       2177.57       2026.95        44.81 o
   4   3   3       2546.79       2720.80        57.99 o
   5   3   3        771.72        773.73        23.96 o
   6   3   3       1880.96       1787.51        37.37 o
   7   3   3        449.96        442.89        19.63 o
   8   3   3       2526.41       2431.80        52.61 o
   9   3   3        100.10         75.36        14.24 o
  10   3   3        159.63        201.42        21.77 o
  11   3   3       1288.69       1335.32        41.01 o
  12   3   3         84.43        100.38        17.92 o
 -12   4   3        394.88        435.02        31.64 o
 -11   4   3        183.89        155.86        20.81 o
 -10   4   3       1343.73       1232.03        34.65 o
  -9   4   3       1430.04       1362.03        34.44 o
  -8   4   3        800.67        798.01        32.23 o
  -7   4   3        273.03        316.80        18.21 o
  -6   4   3       1283.40       1281.80        37.20 o
  -5   4   3       1269.60       1197.26        44.47 o
  -4   4   3       1144.68       1256.53        35.13 o
  -3   4   3       1871.20       2188.24        50.07 o
  -2   4   3       8373.34       9003.01       149.01 o
  -1   4   3        296.91        404.95        17.62 o
   0   4   3         71.75         43.67         9.28 o
   1   4   3        289.70        333.82        18.24 o
   2   4   3       8317.60       8860.50       163.24 o
   3   4   3       1904.82       2256.67        50.87 o
   4   4   3       1135.58       1255.73        38.99 o
   5   4   3       1267.83       1168.53        34.48 o
   6   4   3       1279.91       1310.32        38.23 o
   7   4   3        283.47        347.32        19.66 o
   8   4   3        814.80        811.41        28.69 o
   9   4   3       1434.49       1247.47        37.31 o
  10   4   3       1336.54       1293.25        45.12 o
  11   4   3        179.85        166.63        19.32 o
  12   4   3        392.58        447.27        29.59 o
 -12   5   3        354.60        405.01        33.40 o
 -11   5   3        148.33        143.42        19.74 o
 -10   5   3        192.92        186.88        17.11 o
  -9   5   3       2280.07       2208.37        58.41 o
  -8   5   3        133.84        225.33        17.49 o
  -7   5   3        166.07        172.70        15.07 o
  -6   5   3         94.89        117.57        16.16 o
  -5   5   3       2026.39       1775.64        46.56 o
  -4   5   3        995.54       1015.27        32.77 o
  -3   5   3       8930.47       9079.75       153.11 o
  -2   5   3       8136.50       8973.70       150.81 o
  -1   5   3       1494.99       1436.54        35.21 o
   0   5   3       1960.82       1651.32        57.89 o
   1   5   3       1507.42       1422.71        49.00 o
   2   5   3       8135.53       8819.98       189.65 o
   3   5   3       8965.46       9106.08       194.87 o
   4   5   3        975.98        992.70        34.74 o
   5   5   3       2035.74       1734.69        53.27 o
   6   5   3         99.44        102.09        19.42 o
   7   5   3        163.72        160.77        17.77 o
   8   5   3        130.62        227.68        18.86 o
   9   5   3       2254.72       2196.87        52.87 o
  10   5   3        190.21        199.74        19.90 o
  11   5   3        145.59        152.88        19.75 o
  12   5   3        354.90        387.55        28.48 o
 -12   6   3        317.49        361.50        29.61 o
 -11   6   3        115.35        138.86        26.96 o
 -10   6   3       1193.79       1232.55        41.99 o
  -9   6   3        163.59        166.62        20.01 o
  -8   6   3         61.55        115.84        22.82 o
  -7   6   3        268.56        223.87        20.59 o
  -6   6   3        352.84        419.85        25.46 o
  -5   6   3        568.57        598.63        27.68 o
  -4   6   3       5835.41       5895.90       118.00 o
  -3   6   3        267.59        330.66        24.08 o
  -2   6   3       1469.13       1794.92        56.38 o
  -1   6   3         19.26         12.27        18.12 o
   0   6   3       2058.30       2374.66        52.27 o
   1   6   3         21.19         -4.09        15.62 o
   2   6   3       1469.04       1727.70        61.96 o
   3   6   3        265.20        303.37        31.99 o
   4   6   3       5830.67       5895.74       134.06 o
   5   6   3        565.17        575.40        28.95 o
   6   6   3        362.62        389.64        26.13 o
   7   6   3        267.60        202.88        19.49 o
   8   6   3         57.58         97.95        17.95 o
   9   6   3        165.31        141.03        19.40 o
  10   6   3       1194.14       1196.94        40.21 o
  11   6   3        117.37        136.56        20.74 o
  12   6   3        325.21        313.44        36.05 o
 -11   7   3         31.33         55.09        17.58 o
 -10   7   3          9.27         27.45        17.49 o
  -9   7   3        336.29        347.01        25.66 o
  -8   7   3        643.04        658.39        39.87 o
  -7   7   3        664.63        778.45        73.43 o
  -6   7   3         10.99         15.10        14.09 o
  -5   7   3        434.63        489.92        29.78 o
  -4   7   3       1255.60       1273.37        31.45 o
  -3   7   3        912.04        863.47        29.64 o
  -2   7   3       1478.92       1797.47        46.59 o
  -1   7   3       1452.35       1496.40        65.64 o
   0   7   3        120.24        130.68        16.43 o
   1   7   3       1443.33       1506.14        44.80 o
   2   7   3       1473.14       1796.50       104.86 o
   3   7   3        911.88        779.11        35.68 o
   4   7   3       1263.06       1334.72        45.84 o
   5   7   3        426.61        413.98        27.34 o
   6   7   3         10.29          3.33        14.42 o
   7   7   3        666.74        741.08       112.61 o
   8   7   3        632.03        665.44        38.89 o
   9   7   3        341.71        310.10        25.94 o
  10   7   3          7.90         -0.75        16.03 o
  11   7   3         32.12         67.54        19.28 o
 -11   8   3         14.93         12.89        25.07 o
 -10   8   3        116.69        115.30        22.46 o
  -9   8   3        367.14        328.04        36.10 o
  -8   8   3        934.96        845.20        36.57 o
  -7   8   3        653.01        638.57        93.08 o
  -6   8   3         14.28         -6.42        17.03 o
  -5   8   3        357.62        290.76        17.25 o
  -4   8   3       2370.98       2391.44        49.07 o
  -3   8   3       3630.30       3561.48        65.61 o
  -2   8   3       1369.54       1391.24        45.61 o
  -1   8   3        689.23        765.40        31.47 o
   0   8   3       2272.98       2598.43        52.49 o
   1   8   3        679.77        721.85        30.15 o
   2   8   3       1346.80       1372.90        87.89 o
   3   8   3       3657.19       3501.21        92.20 o
   4   8   3       2389.99       2445.98        70.46 o
   5   8   3        355.63        350.43        36.10 o
   6   8   3         13.36         81.24        18.51 o
   7   8   3        650.92        621.13        33.12 o
   8   8   3        938.68        891.42        38.73 o
   9   8   3        366.04        332.22        29.39 o
  10   8   3        118.47        155.66        30.61 o
  11   8   3         15.25         37.27        31.18 o
 -10   9   3         21.62         50.53        28.07 o
  -9   9   3          6.43          5.11        21.36 o
  -8   9   3        576.45        570.19        35.00 o
  -7   9   3       1895.06       1862.58        54.44 o
  -6   9   3         51.08         85.20        24.61 o
  -5   9   3        218.30        228.28        17.21 o
  -4   9   3        588.29        620.00        25.98 o
  -3   9   3       3027.81       3066.79        68.39 o
  -2   9   3        688.49        730.56        37.97 o
  -1   9   3         32.83         50.63        15.91 o
   0   9   3        703.87        606.20        46.68 o
   1   9   3         31.65         18.28        12.52 o
   2   9   3        684.41        634.56        75.33 o
   3   9   3       3040.83       2958.90        98.40 o
   4   9   3        603.95        703.95        39.92 o
   5   9   3        214.70        197.63        24.58 o
   6   9   3         49.29         39.79        22.04 o
   7   9   3       1889.96       1916.18        57.75 o
   8   9   3        584.57        568.24        52.74 o
   9   9   3          7.19          9.48        18.72 o
  10   9   3         21.07         -7.48        19.15 o
  -9  10   3         19.26         21.88        29.23 o
  -8  10   3        230.40        274.20        40.91 o
  -7  10   3        378.70        353.82        26.90 o
  -6  10   3       6323.88       6216.31       121.40 o
  -5  10   3       1253.92       1199.92        36.07 o
  -4  10   3       1854.48       1848.85        52.03 o
  -3  10   3        154.36        160.40        20.35 o
  -2  10   3       5145.07       5068.57       101.68 o
  -1  10   3        503.62        544.30        35.16 o
   0  10   3        761.52        798.04        32.91 o
   1  10   3        502.17        465.76        31.44 o
   2  10   3       5168.63       5376.97       179.07 o
   3  10   3        156.50        179.63        47.17 o
   4  10   3       1852.49       2000.14        74.21 o
   5  10   3       1257.56       1297.54        53.56 o
   6  10   3       6328.56       6078.51       131.74 o
   7  10   3        375.11        325.11        30.29 o
   8  10   3        229.88        250.51        28.34 o
   9  10   3         18.76         13.04        20.50 o
  -9  11   3         20.27         -5.60        33.60 o
  -8  11   3         23.61         65.26        22.68 o
  -7  11   3        170.50        185.67        42.61 o
  -6  11   3        178.49        170.88        33.07 o
  -5  11   3        671.59        714.18        30.94 o
  -4  11   3        316.63        334.67        26.20 o
  -3  11   3        125.20        116.38        20.17 o
  -2  11   3         88.15        120.57        20.54 o
  -1  11   3        493.22        523.37        31.85 o
   0  11   3        106.01         83.24        17.78 o
   1  11   3        503.45        523.29        27.05 o
   2  11   3         89.49        127.42        41.40 o
   3  11   3        122.76        188.48        45.81 o
   4  11   3        316.67        323.79        36.37 o
   5  11   3        683.08        689.41        48.92 o
   6  11   3        181.80        176.76        28.90 o
   7  11   3        168.78        250.51        30.57 o
   8  11   3         23.89         -7.23        21.28 o
   9  11   3         22.08         98.20        69.23 o
  -8  12   3        620.97        650.17        80.08 o
  -7  12   3          0.40          2.31        22.41 o
  -6  12   3        124.23        240.46        29.81 o
  -5  12   3         98.51         76.24        21.40 o
  -4  12   3        307.51        309.28        31.00 o
  -3  12   3        656.60        664.71        52.49 o
  -2  12   3        821.11        749.01        37.52 o
  -1  12   3        548.39        566.45        33.28 o
   0  12   3         10.62         18.06        17.36 o
   1  12   3        556.50        556.40        31.48 o
   2  12   3        832.63        825.80        51.22 o
   3  12   3        644.81        632.36        65.35 o
   4  12   3        304.79        275.24       106.89 o
   5  12   3         97.74         84.96        28.21 o
   6  12   3        123.31        209.30        30.72 o
   7  12   3          0.16         48.38        32.20 o
   8  12   3        623.81        715.33        85.51 o
  -6  13   3          0.06         -0.69        26.13 o
  -5  13   3        112.06        141.20        45.46 o
  -4  13   3        739.35        798.86        42.89 o
  -3  13   3         73.63         81.77        21.75 o
  -2  13   3        158.42        149.75        27.92 o
  -1  13   3        398.72        429.22        28.38 o
   0  13   3        218.32        202.06        22.41 o
   1  13   3        398.95        414.69        26.72 o
   2  13   3        160.83        142.11        34.97 o
   3  13   3         72.62         45.91        40.91 o
   4  13   3        736.19        712.51       139.13 o
   5  13   3        108.29        133.22        33.00 o
   6  13   3          0.19        -24.23        24.23 o
  -4  14   3        464.07        432.80        40.54 o
  -3  14   3        158.69        101.26        25.75 o
  -2  14   3        153.25        166.75        23.26 o
  -1  14   3         72.92         68.35        25.37 o
   0  14   3        278.14        272.47        25.99 o
   1  14   3         70.02         38.33        19.75 o
   2  14   3        145.99        145.58        53.28 o
   0  15   3          7.46        -24.06        24.06 o
   0   0   4       1236.15       1298.23        44.30 o
   1   0   4      12455.10      12146.92       172.65 o
   2   0   4       1610.66       1461.66        31.80 o
   3   0   4       1296.48       1456.20        35.22 o
   4   0   4        895.59        797.97        20.14 o
   5   0   4       2715.79       3073.64        56.83 o
   6   0   4        248.86        212.80        12.68 o
   7   0   4        218.50        240.91        14.33 o
   8   0   4        777.65        826.30        25.28 o
   9   0   4         17.92         20.11        10.88 o
  10   0   4       2487.76       2376.67        50.67 o
  11   0   4        477.83        526.81        35.58 o
  12   0   4        233.32        292.60        24.80 o
  13   0   4          0.02         30.27        25.71 o
 -13   1   4        137.87        156.43        32.24 o
 -12   1   4        260.14        289.09        25.28 o
 -11   1   4        237.82        236.23        20.64 o
 -10   1   4       3111.36       3164.62        67.44 o
  -9   1   4        271.07        292.19        16.99 o
  -8   1   4       2754.79       2724.39        50.89 o
  -7   1   4       5274.62       4708.86        71.56 o
  -6   1   4       7217.48       7064.24       100.58 o
  -5   1   4        362.81        457.42        16.70 o
  -4   1   4        816.30        674.22        18.73 o
  -3   1   4       8306.09       7007.92       113.67 o
  -2   1   4       3656.45       3113.81        53.52 o
  -1   1   4       1878.65       2242.47        42.83 o
   0   1   4         75.67        140.27         5.06 o
   1   1   4       1911.25       2229.96        52.92 o
   2   1   4       3654.91       3140.26        60.54 o
   3   1   4       8332.95       6830.20       125.45 o
   4   1   4        807.67        633.29        18.18 o
   5   1   4        359.09        499.05        17.87 o
   6   1   4       7188.06       6969.53       118.07 o
   7   1   4       5302.29       4790.36        79.49 o
   8   1   4       2732.07       2722.76        52.13 o
   9   1   4        269.85        249.52        16.96 o
  10   1   4       3105.45       3084.89        60.58 o
  11   1   4        231.67        244.04        19.94 o
  12   1   4        256.07        249.01        21.47 o
  13   1   4        141.66        133.52        27.00 o
 -13   2   4         42.80         97.73        36.65 o
 -12   2   4        274.41        281.59        28.31 o
 -11   2   4        242.59        195.12        17.42 o
 -10   2   4        260.41        242.75        17.33 o
  -9   2   4        225.24        244.30        16.79 o
  -8   2   4       1135.50       1121.43        28.70 o
  -7   2   4       1618.34       1763.63        50.33 o
  -6   2   4       1846.93       1921.03        40.35 o
  -5   2   4       5485.85       5227.33       101.02 o
  -4   2   4       9283.37       8403.05       153.52 o
  -3   2   4       2639.84       2601.66        52.98 o
  -2   2   4       1828.97       1674.58        60.45 o
  -1   2   4      17969.69      18228.71       318.37 o
   0   2   4        302.90        268.99        10.97 o
   1   2   4      18103.29      18221.74       318.71 o
   2   2   4       1832.02       1769.06        44.00 o
   3   2   4       2641.77       2647.40        58.92 o
   4   2   4       9354.74       8602.67       141.61 o
   5   2   4       5442.53       5192.99        89.93 o
   6   2   4       1862.97       1947.27        42.05 o
   7   2   4       1621.81       1786.41        38.29 o
   8   2   4       1142.48       1069.09        29.34 o
   9   2   4        217.58        247.15        17.17 o
  10   2   4        267.60        273.76        19.65 o
  11   2   4        239.82        221.18        20.00 o
  12   2   4        275.29        287.44        22.64 o
  13   2   4         41.21         44.94        26.28 o
 -12   3   4        126.96        100.37        16.36 o
 -11   3   4        161.47        173.32        16.83 o
 -10   3   4        844.36        833.10        28.26 o
  -9   3   4        509.58        480.30        21.34 o
  -8   3   4         40.65         34.38        10.13 o
  -7   3   4       1227.03       1138.72        31.01 o
  -6   3   4       3822.79       3944.40        81.65 o
  -5   3   4        627.45        694.93        26.64 o
  -4   3   4       4285.76       4341.44        85.82 o
  -3   3   4        537.68        459.42        38.01 o
  -2   3   4       4750.36       4504.61        77.95 o
  -1   3   4       1234.39       1213.54        33.60 o
   0   3   4      24443.71      24029.60       419.74 o
   1   3   4       1241.38       1216.62        33.40 o
   2   3   4       4734.93       4474.51        98.71 o
   3   3   4        525.18        442.29        39.38 o
   4   3   4       4303.05       4329.51        85.75 o
   5   3   4        631.95        670.62        22.48 o
   6   3   4       3816.00       3995.52        73.99 o
   7   3   4       1248.75       1129.71        29.62 o
   8   3   4         38.09         45.79        11.66 o
   9   3   4        507.40        472.21        23.06 o
  10   3   4        845.20        809.99        31.46 o
  11   3   4        158.17        169.25        19.14 o
  12   3   4        123.17         73.76        17.96 o
 -12   4   4         18.18         52.30        16.76 o
 -11   4   4        191.75        156.03        19.81 o
 -10   4   4        290.87        354.87        20.32 o
  -9   4   4       1117.29       1015.88        29.66 o
  -8   4   4        537.22        540.24        23.64 o
  -7   4   4       3850.24       3588.01        78.50 o
  -6   4   4        312.60        311.63        19.57 o
  -5   4   4       4254.58       4142.16        85.20 o
  -4   4   4       1083.02       1269.92        46.53 o
  -3   4   4       1677.92       1579.79        36.95 o
  -2   4   4        669.93        815.96        24.30 o
  -1   4   4      10312.27      10156.67       184.99 o
   0   4   4       2520.94       2270.71        44.12 o
   1   4   4      10314.31      10196.85       246.76 o
   2   4   4        673.40        834.68        29.54 o
   3   4   4       1675.22       1616.88        40.35 o
   4   4   4       1062.95       1301.97        35.86 o
   5   4   4       4290.13       4138.04        85.31 o
   6   4   4        319.98        321.71        30.54 o
   7   4   4       3851.02       3572.68        70.11 o
   8   4   4        530.96        538.50        23.33 o
   9   4   4       1124.16       1009.30        33.95 o
  10   4   4        287.75        338.59        26.71 o
  11   4   4        194.70        178.98        19.90 o
  12   4   4         18.47         31.90        22.92 o
 -12   5   4        183.88        183.37        29.52 o
 -11   5   4         78.75         73.92        15.09 o
 -10   5   4        315.98        330.18        22.46 o
  -9   5   4         37.92         55.85        20.61 o
  -8   5   4        808.36        715.41        41.93 o
  -7   5   4       1986.73       1743.74        47.85 o
  -6   5   4       1319.83       1259.63        38.62 o
  -5   5   4       2401.09       2410.19        70.67 o
  -4   5   4       3731.17       3932.56        82.49 o
  -3   5   4       8469.22       8713.43       147.62 o
  -2   5   4       5882.01       5747.89       101.43 o
  -1   5   4       5003.75       5370.56        95.24 o
   0   5   4        448.29        540.82        21.25 o
   1   5   4       5048.76       5214.85       103.72 o
   2   5   4       5942.30       5759.02       128.65 o
   3   5   4       8424.96       8509.30       160.37 o
   4   5   4       3717.88       3892.80        81.65 o
   5   5   4       2404.79       2439.59        70.06 o
   6   5   4       1336.87       1287.58        38.87 o
   7   5   4       1957.70       1711.76        55.38 o
   8   5   4        802.48        756.30        29.35 o
   9   5   4         37.04         54.29        15.34 o
  10   5   4        318.64        332.17        26.77 o
  11   5   4         79.74         62.95        17.93 o
  12   5   4        187.46        236.90        24.52 o
 -12   6   4         15.36         32.31        18.75 o
 -11   6   4         81.06         66.26        18.81 o
 -10   6   4        172.01        264.81        26.84 o
  -9   6   4        585.37        564.70        26.87 o
  -8   6   4        231.49        231.25        22.13 o
  -7   6   4        678.92        689.98        31.70 o
  -6   6   4        592.10        549.55        28.06 o
  -5   6   4       1229.20       1179.02        37.87 o
  -4   6   4       3114.84       3106.32        64.67 o
  -3   6   4       1085.26       1360.97        37.06 o
  -2   6   4       4308.96       4681.90        87.20 o
  -1   6   4       2031.18       2658.77        95.00 o
   0   6   4      10673.88      11169.37       269.10 o
   1   6   4       2053.85       2496.87        93.42 o
   2   6   4       4298.14       4610.17       164.24 o
   3   6   4       1076.79       1370.34        45.06 o
   4   6   4       3106.91       3093.90        78.89 o
   5   6   4       1247.79       1193.84        41.34 o
   6   6   4        588.87        510.50        29.19 o
   7   6   4        679.89        702.23        34.16 o
   8   6   4        230.17        243.89        22.55 o
   9   6   4        573.24        568.71        29.33 o
  10   6   4        175.63        243.45        21.59 o
  11   6   4         82.79        118.10        20.09 o
  12   6   4         15.72         -3.39        33.26 o
 -11   7   4        206.25        227.02        22.53 o
 -10   7   4        379.40        432.60        40.15 o
  -9   7   4        909.81        907.38        39.30 o
  -8   7   4         22.01         17.43        16.46 o
  -7   7   4        881.19        961.79        55.97 o
  -6   7   4        238.75        297.43        23.28 o
  -5   7   4        764.25        735.15        30.05 o
  -4   7   4       2653.30       2722.57        60.26 o
  -3   7   4        986.66        971.93        32.39 o
  -2   7   4       1094.41       1128.43        34.11 o
  -1   7   4       1587.58       1644.65        55.83 o
   0   7   4       5640.15       5949.46       108.57 o
   1   7   4       1610.35       1602.57        84.83 o
   2   7   4       1113.36       1134.25        73.64 o
   3   7   4        983.04        941.81        44.12 o
   4   7   4       2660.36       2771.93        84.73 o
   5   7   4        761.12        773.57        42.20 o
   6   7   4        245.53        360.68        44.38 o
   7   7   4        881.97        849.82        38.62 o
   8   7   4         22.85         45.20        16.51 o
   9   7   4        908.57        828.12        38.03 o
  10   7   4        379.12        385.68        27.75 o
  11   7   4        211.32        211.70        27.35 o
 -11   8   4        369.58        374.00        40.02 o
 -10   8   4         99.89        124.18        29.38 o
  -9   8   4        137.65         97.30        57.35 o
  -8   8   4        115.75        219.36        61.30 o
  -7   8   4        817.68        855.65        38.74 o
  -6   8   4       2015.82       1918.30        51.52 o
  -5   8   4       1118.69       1174.29        38.67 o
  -4   8   4       2137.45       2138.21        52.99 o
  -3   8   4        915.09        955.64        28.62 o
  -2   8   4       1173.44       1187.04        36.69 o
  -1   8   4       2610.60       2628.50        65.56 o
   0   8   4       2996.60       3241.40        61.11 o
   1   8   4       2607.09       2661.77       142.52 o
   2   8   4       1169.31       1185.32       103.16 o
   3   8   4        904.09       1023.38        49.40 o
   4   8   4       2164.06       2292.42        97.70 o
   5   8   4       1146.84       1188.54        47.15 o
   6   8   4       1999.87       1952.55        61.35 o
   7   8   4        820.21        842.44        51.98 o
   8   8   4        117.16        193.35        22.28 o
   9   8   4        137.64        102.24        22.24 o
  10   8   4         98.20        113.57        22.30 o
  11   8   4        373.22        374.70        33.04 o
 -10   9   4         46.63         92.07        29.48 o
  -9   9   4        380.62        428.83        45.20 o
  -8   9   4        341.12        382.28        44.17 o
  -7   9   4        607.39        685.01        48.98 o
  -6   9   4        468.08        445.39        23.36 o
  -5   9   4        422.69        392.82        21.05 o
  -4   9   4       1349.23       1298.06        44.50 o
  -3   9   4        530.30        529.60        28.57 o
  -2   9   4        235.12        296.17        25.95 o
  -1   9   4       2051.21       2165.24        54.31 o
   0   9   4         86.96        120.70        15.39 o
   1   9   4       2054.50       2083.18        54.44 o
   2   9   4        228.23        296.58        58.37 o
   3   9   4        533.97        557.81        42.28 o
   4   9   4       1340.71       1201.10        56.58 o
   5   9   4        421.67        403.40        44.69 o
   6   9   4        459.61        483.27        35.14 o
   7   9   4        591.68        667.77        38.20 o
   8   9   4        347.41        324.08        47.59 o
   9   9   4        377.08        393.59        32.82 o
  10   9   4         45.57         79.44        23.38 o
  -9  10   4        209.63        262.54        42.80 o
  -8  10   4        276.35        302.64        26.32 o
  -7  10   4         14.46         13.75        24.71 o
  -6  10   4        616.70        727.46        60.54 o
  -5  10   4        569.17        551.17        26.81 o
  -4  10   4       1466.93       1482.09        40.02 o
  -3  10   4        219.26        226.33        26.30 o
  -2  10   4        376.59        406.74        26.79 o
  -1  10   4       1508.55       1605.78        53.00 o
   0  10   4        276.57        322.54        26.20 o
   1  10   4       1513.56       1510.44        48.90 o
   2  10   4        377.98        483.65        67.53 o
   3  10   4        222.74        254.85        32.37 o
   4  10   4       1458.63       1424.94        65.71 o
   5  10   4        563.68        456.21        34.82 o
   6  10   4        619.67        771.20        57.69 o
   7  10   4         14.80         53.76        22.30 o
   8  10   4        278.03        324.86        31.01 o
   9  10   4        208.48        234.98        32.35 o
  -8  11   4        617.21        765.16        66.92 o
  -7  11   4       1160.71       1011.80        63.50 o
  -6  11   4        514.16        464.10        35.31 o
  -5  11   4       1026.24       1048.86        35.67 o
  -4  11   4        456.26        422.39        28.86 o
  -3  11   4       1680.98       1567.23        49.13 o
  -2  11   4        309.02        298.31        24.98 o
  -1  11   4        341.40        328.67        26.99 o
   0  11   4       1709.40       1801.33        49.09 o
   1  11   4        341.31        304.02        22.23 o
   2  11   4        301.65        373.25        52.90 o
   3  11   4       1669.23       1475.45       109.95 o
   4  11   4        458.89        358.56        53.95 o
   5  11   4       1023.36       1082.90        60.17 o
   6  11   4        522.19        528.28        39.19 o
   7  11   4       1177.50       1098.26        52.13 o
   8  11   4        608.44        643.41        44.62 o
  -7  12   4        463.40        487.58        37.60 o
  -6  12   4         74.13         53.40        24.05 o
  -5  12   4        303.44        287.91        29.03 o
  -4  12   4       1012.52       1153.87        83.15 o
  -3  12   4        452.17        471.02        37.39 o
  -2  12   4         22.62         28.89        18.54 o
  -1  12   4       2023.52       2032.87        51.19 o
   0  12   4        212.65        272.61        29.50 o
   1  12   4       2032.18       1999.05        51.94 o
   2  12   4         22.30         84.12        35.35 o
   3  12   4        455.68        397.65        56.58 o
   4  12   4       1020.90        958.41        53.61 o
   5  12   4        291.46        347.57        39.67 o
   6  12   4         71.86         56.47        28.21 o
   7  12   4        462.91        619.32       100.37 o
  -6  13   4         11.88          1.76        25.45 o
  -5  13   4        363.79        290.93        37.54 o
  -4  13   4        129.81        130.69        24.17 o
  -3  13   4         88.06         60.33        27.72 o
  -2  13   4        263.60        214.48        26.80 o
  -1  13   4        111.72        138.48        25.32 o
   0  13   4        540.20        566.45        31.47 o
   1  13   4        112.22        131.50        21.12 o
   2  13   4        263.68        266.60        36.57 o
   3  13   4         89.71         80.06        42.05 o
   4  13   4        131.57         79.14        41.39 o
   5  13   4        365.41        291.89        40.55 o
   6  13   4         12.73         61.09        32.68 o
  -4  14   4        762.12        706.52        60.74 o
  -3  14   4         22.66        -20.87        20.87 o
  -2  14   4         25.96         52.02        35.78 o
  -1  14   4        221.95        168.31        24.34 o
   0  14   4        330.46        313.66        27.58 o
   1  14   4        214.19        176.35        33.29 o
   2  14   4         26.76         35.21        33.93 o
   3  14   4         21.37         23.75        39.36 o
   1   0   5       1711.36       1630.92        30.20 o
   2   0   5       2024.52       2165.46        44.11 o
   3   0   5      28569.62      25164.67       439.78 o
   4   0   5        238.96        276.77        11.30 o
   5   0   5       7767.51       7079.36       118.27 o
   6   0   5       1122.80       1073.68        40.65 o
   7   0   5        377.78        271.68        14.81 o
   8   0   5         83.89         71.13        11.27 o
   9   0   5        632.47        666.82        25.54 o
  10   0   5        227.72        311.69        22.01 o
  11   0   5        745.88        678.32        27.66 o
  12   0   5       2246.55       2527.52        66.34 o
  13   0   5          4.11         30.28        26.74 o
 -13   1   5        101.83        151.35        41.40 o
 -12   1   5        228.10        247.01        23.86 o
 -11   1   5       1309.25       1435.75        42.46 o
 -10   1   5        616.77        601.48        33.75 o
  -9   1   5        612.97        553.03        24.72 o
  -8   1   5       1466.34       1473.62        30.96 o
  -7   1   5       2602.71       2489.82        42.66 o
  -6   1   5       1578.57       1577.06        44.71 o
  -5   1   5        221.02        224.18        10.98 o
  -4   1   5       2014.58       2092.51        40.19 o
  -3   1   5       3148.31       3463.38        60.74 o
  -2   1   5       5178.35       4460.85        96.26 o
  -1   1   5       2985.14       3291.78       106.81 o
   0   1   5        139.88         53.09         4.52 o
   1   1   5       3009.16       3234.34        67.33 o
   2   1   5       5174.66       4428.62        73.86 o
   3   1   5       3136.65       3444.50        68.00 o
   4   1   5       1995.76       2051.34        46.30 o
   5   1   5        208.25        229.18        12.82 o
   6   1   5       1568.17       1528.33        52.05 o
   7   1   5       2603.56       2530.18        51.79 o
   8   1   5       1469.60       1464.90        34.43 o
   9   1   5        597.53        561.85        22.63 o
  10   1   5        619.30        635.49        25.93 o
  11   1   5       1316.98       1360.69        38.17 o
  12   1   5        229.37        224.12        31.44 o
  13   1   5        103.80        113.26        30.43 o
 -12   2   5        183.44        226.33        27.52 o
 -11   2   5         27.52         39.08        13.62 o
 -10   2   5        387.51        453.25        21.55 o
  -9   2   5        366.38        368.82        29.79 o
  -8   2   5        339.20        357.29        17.11 o
  -7   2   5       1982.20       1719.44        35.29 o
  -6   2   5        146.04        189.45        21.73 o
  -5   2   5        407.45        456.65        24.10 o
  -4   2   5       2550.09       2244.12        48.24 o
  -3   2   5       7839.11       7765.88       126.69 o
  -2   2   5       1296.51       1137.94        47.39 o
  -1   2   5      15750.11      14713.21       258.14 o
   0   2   5      21715.94      21337.47       332.04 o
   1   2   5      15842.11      14611.16       350.30 o
   2   2   5       1287.96       1157.90        28.95 o
   3   2   5       7933.29       7886.78       144.52 o
   4   2   5       2543.96       2269.42        44.22 o
   5   2   5        404.82        456.97        26.18 o
   6   2   5        141.36        150.93        21.74 o
   7   2   5       2000.60       1804.81        41.50 o
   8   2   5        337.16        357.19        25.55 o
   9   2   5        370.64        340.14        23.37 o
  10   2   5        386.78        450.63        23.21 o
  11   2   5         29.46         49.58        14.71 o
  12   2   5        183.90        215.29        21.22 o
 -12   3   5        218.12        237.32        20.13 o
 -11   3   5        674.27        653.87        26.20 o
 -10   3   5        260.56        188.51        18.66 o
  -9   3   5        232.17        209.62        15.70 o
  -8   3   5       1034.98        990.59        26.88 o
  -7   3   5       1557.37       1528.71        41.73 o
  -6   3   5         15.12         25.28        17.44 o
  -5   3   5        400.76        325.38        17.92 o
  -4   3   5       8239.49       8550.19       157.76 o
  -3   3   5        204.54        245.44        13.62 o
  -2   3   5       2953.16       2663.51        49.96 o
  -1   3   5      11600.27      12488.46       317.97 o
   0   3   5         48.74         25.07         8.34 o
   1   3   5      11507.57      12511.69       223.25 o
   2   3   5       2954.29       2738.68        57.40 o
   3   3   5        198.88        261.35        16.80 o
   4   3   5       8271.87       8699.99       183.50 o
   5   3   5        387.91        313.00        16.38 o
   6   3   5         14.68         13.40        11.25 o
   7   3   5       1556.69       1519.12        37.85 o
   8   3   5       1038.11        990.33        29.23 o
   9   3   5        223.61        197.76        17.18 o
  10   3   5        263.85        211.10        18.43 o
  11   3   5        668.87        723.08        31.86 o
  12   3   5        218.57        250.69        22.71 o
 -12   4   5        154.31        153.88        17.96 o
 -11   4   5        213.22        172.66        17.52 o
 -10   4   5        200.54        212.05        18.15 o
  -9   4   5        141.54        181.46        15.25 o
  -8   4   5        289.69        293.88        21.28 o
  -7   4   5        420.33        394.28        22.65 o
  -6   4   5        767.78        727.12        27.93 o
  -5   4   5        141.10        115.41        14.16 o
  -4   4   5        928.89       1019.81        29.09 o
  -3   4   5       8443.54       8099.80       135.89 o
  -2   4   5      12052.98      11190.68       182.28 o
  -1   4   5       4736.54       4951.40        95.75 o
   0   4   5       1901.07       1980.26        59.66 o
   1   4   5       4728.46       4795.15        93.92 o
   2   4   5      12076.31      11283.55       205.37 o
   3   4   5       8537.40       8042.52       172.87 o
   4   4   5        924.63        985.98        31.04 o
   5   4   5        138.60         92.14        15.48 o
   6   4   5        758.32        735.96        26.00 o
   7   4   5        402.05        400.30        21.56 o
   8   4   5        294.47        302.34        18.82 o
   9   4   5        138.99        182.73        17.42 o
  10   4   5        197.85        210.98        20.09 o
  11   4   5        214.01        152.87        19.17 o
  12   4   5        154.25        172.33        23.20 o
 -12   5   5         53.99         60.07        16.06 o
 -11   5   5        212.60        230.40        19.53 o
 -10   5   5        896.78        924.82        30.34 o
  -9   5   5        238.73        215.41        22.71 o
  -8   5   5       1084.57       1109.11        38.38 o
  -7   5   5        379.59        463.24        25.51 o
  -6   5   5        308.27        354.79        22.36 o
  -5   5   5       1162.83        996.09        33.39 o
  -4   5   5        715.74        778.67        27.42 o
  -3   5   5       3482.31       3229.36        63.65 o
  -2   5   5       1941.92       1903.51        42.99 o
  -1   5   5       5994.35       5646.33       131.95 o
   0   5   5       3971.15       3960.96       101.41 o
   1   5   5       5970.72       5333.39       105.79 o
   2   5   5       1936.74       1829.49        46.85 o
   3   5   5       3476.21       3217.33       125.96 o
   4   5   5        702.27        778.02        28.59 o
   5   5   5       1181.39        966.02        32.96 o
   6   5   5        311.21        354.85        22.39 o
   7   5   5        381.78        479.59        29.14 o
   8   5   5       1083.73       1088.17        32.73 o
   9   5   5        243.05        217.37        26.01 o
  10   5   5        888.88        941.69        35.28 o
  11   5   5        209.03        254.00        22.88 o
  12   5   5         53.70         52.21        22.38 o
 -11   6   5        402.64        417.22        24.51 o
 -10   6   5        288.41        301.57        28.37 o
  -9   6   5        267.86        260.13        37.91 o
  -8   6   5       1076.99       1093.19        48.98 o
  -7   6   5       1568.08       1586.08        47.32 o
  -6   6   5        248.82        230.25        24.88 o
  -5   6   5       1539.41       1518.97        51.50 o
  -4   6   5       1464.05       1414.71        62.54 o
  -3   6   5       3298.50       3672.18        72.40 o
  -2   6   5         99.70         78.70        15.88 o
  -1   6   5        677.76        868.01        29.19 o
   0   6   5       2486.65       2404.33        57.14 o
   1   6   5        683.71        809.72        43.20 o
   2   6   5        100.70         77.35        16.67 o
   3   6   5       3273.21       3607.58        88.86 o
   4   6   5       1470.34       1401.60        41.33 o
   5   6   5       1534.67       1536.44        43.54 o
   6   6   5        252.73        248.65        20.04 o
   7   6   5       1547.13       1497.24        52.17 o
   8   6   5       1076.25       1142.03        36.90 o
   9   6   5        267.85        238.14        23.43 o
  10   6   5        288.85        294.03        23.40 o
  11   6   5        393.98        434.86        29.74 o
 -11   7   5        384.26        432.11        41.18 o
 -10   7   5        151.32        106.46        21.93 o
  -9   7   5       1478.30       1476.32        49.59 o
  -8   7   5        255.89        273.70        24.35 o
  -7   7   5        887.52        954.00        38.54 o
  -6   7   5        312.46        290.75        22.15 o
  -5   7   5       2070.95       1906.90        48.54 o
  -4   7   5       1718.62       1911.75        48.40 o
  -3   7   5       2519.98       2540.29        56.58 o
  -2   7   5       1092.32       1150.73        34.70 o
  -1   7   5        847.59        897.80        31.09 o
   0   7   5        856.49       1231.26        39.17 o
   1   7   5        861.19        887.87        55.41 o
   2   7   5       1089.10       1102.03        50.06 o
   3   7   5       2533.99       2538.35        82.62 o
   4   7   5       1721.10       1881.99        67.53 o
   5   7   5       2074.75       1897.37        77.69 o
   6   7   5        314.90        302.31        25.43 o
   7   7   5        891.01        883.05        41.61 o
   8   7   5        253.09        238.76        22.93 o
   9   7   5       1484.08       1438.19        44.05 o
  10   7   5        152.36        106.25        20.11 o
  11   7   5        381.54        460.65        48.03 o
 -11   8   5        165.04        234.14        41.40 o
 -10   8   5        142.33        122.94        67.87 o
  -9   8   5        189.80        188.41        32.45 o
  -8   8   5       1956.33       1963.64        58.80 o
  -7   8   5        600.77        528.58        32.32 o
  -6   8   5        397.66        422.45        42.92 o
  -5   8   5         54.98         51.65        15.12 o
  -4   8   5         47.58         75.82        15.63 o
  -3   8   5       3046.50       2938.02        56.46 o
  -2   8   5        584.86        620.07        28.55 o
  -1   8   5       1764.76       1764.27        45.83 o
   0   8   5       1510.64       1678.29        45.08 o
   1   8   5       1743.00       1680.59        58.48 o
   2   8   5        579.62        542.12        39.93 o
   3   8   5       3067.77       2953.57       229.73 o
   4   8   5         47.45         93.46        35.97 o
   5   8   5         55.53         26.36        16.79 o
   6   8   5        393.18        471.02        52.62 o
   7   8   5        606.80        580.22        36.20 o
   8   8   5       1953.57       1943.11        86.40 o
   9   8   5        187.21        161.48        23.96 o
  10   8   5        143.58        124.53        24.55 o
  11   8   5        164.27        234.23        74.65 o
 -10   9   5          6.25         44.79        31.90 o
  -9   9   5         49.60         24.43        58.03 o
  -8   9   5        823.17        829.46        51.94 o
  -7   9   5        874.63        810.00        37.59 o
  -6   9   5        161.78        181.04        21.53 o
  -5   9   5        773.69        815.26        35.95 o
  -4   9   5        875.55        887.72        29.72 o
  -3   9   5        597.18        593.41        29.99 o
  -2   9   5        463.58        422.14        27.08 o
  -1   9   5       1492.94       1583.40        45.04 o
   0   9   5        132.17        172.77        22.71 o
   1   9   5       1464.23       1537.46        58.61 o
   2   9   5        463.06        488.65        68.55 o
   3   9   5        590.60        648.68        50.22 o
   4   9   5        876.44        909.73        49.24 o
   5   9   5        755.55        775.44        74.65 o
   6   9   5        163.61        193.39        24.90 o
   7   9   5        876.94        922.41        55.53 o
   8   9   5        829.50        796.37        55.26 o
   9   9   5         51.93         55.84        21.76 o
  10   9   5          5.73         -8.77        23.37 o
  -9  10   5          4.44         20.69        33.08 o
  -8  10   5        231.21        182.95        37.02 o
  -7  10   5        451.52        470.55        34.19 o
  -6  10   5        990.79        994.79        53.90 o
  -5  10   5        856.22        851.77        37.34 o
  -4  10   5        271.09        233.56        19.13 o
  -3  10   5        413.12        349.37        26.21 o
  -2  10   5       1449.01       1541.51        47.04 o
  -1  10   5        268.26        268.38        23.74 o
   0  10   5        404.78        489.83        24.84 o
   1  10   5        262.87        270.24        32.72 o
   2  10   5       1447.66       1489.70       107.91 o
   3  10   5        419.23        364.26        37.96 o
   4  10   5        267.93        235.98        33.93 o
   5  10   5        861.09        836.64        51.33 o
   6  10   5        992.66       1073.02        50.03 o
   7  10   5        457.98        384.24        33.61 o
   8  10   5        231.68        196.75        27.27 o
   9  10   5          4.20        -13.84        20.48 o
  -8  11   5        286.28        366.54        51.20 o
  -7  11   5        255.82        210.37        44.49 o
  -6  11   5        724.72        726.47        31.47 o
  -5  11   5        611.25        579.29        28.81 o
  -4  11   5         19.39        -15.09        18.41 o
  -3  11   5        753.17        794.05        37.37 o
  -2  11   5       2396.70       2342.71        61.37 o
  -1  11   5        387.54        339.52        26.45 o
   0  11   5         16.18         10.04        15.07 o
   1  11   5        387.22        417.95        39.21 o
   2  11   5       2405.58       2346.40       108.00 o
   3  11   5        744.30        825.95        93.66 o
   4  11   5         20.44         -3.41        25.35 o
   5  11   5        593.02        522.79        44.68 o
   6  11   5        722.84        722.41        91.96 o
   7  11   5        253.75        295.30        32.19 o
   8  11   5        283.10        273.50        50.07 o
  -7  12   5          4.85         16.12        41.74 o
  -6  12   5        288.37        253.50        23.97 o
  -5  12   5        166.82        134.09        24.30 o
  -4  12   5         52.07         77.71        21.76 o
  -3  12   5        337.58        336.79        27.67 o
  -2  12   5        165.92        155.05        23.04 o
  -1  12   5        734.93        782.01        33.94 o
   0  12   5        574.80        569.23        30.72 o
   1  12   5        727.29        839.83        53.17 o
   2  12   5        165.03        142.22        30.68 o
   3  12   5        348.37        356.76        53.97 o
   4  12   5         50.84         73.39        29.50 o
   5  12   5        167.02        150.22        32.51 o
   6  12   5        291.79        254.04        37.39 o
   7  12   5          5.07          5.25        25.99 o
  -6  13   5        172.42        249.15        59.86 o
  -5  13   5        117.03         94.55        26.74 o
  -4  13   5        399.01        399.00        33.20 o
  -3  13   5        390.12        387.53        31.92 o
  -2  13   5         83.70         71.58        20.85 o
  -1  13   5       1079.38       1006.75        41.43 o
   0  13   5        137.79        153.64        20.94 o
   1  13   5       1065.07       1023.30        47.50 o
   2  13   5         85.70        131.20        33.96 o
   3  13   5        389.72        347.55        55.38 o
   4  13   5        394.23        587.79        69.95 o
   5  13   5        117.06        154.10        34.53 o
   6  13   5        174.86        135.74        43.44 o
  -4  14   5        486.68        388.64        79.07 o
  -3  14   5        431.92        385.11        61.02 o
  -2  14   5        306.60        261.04        36.73 o
  -1  14   5         34.72         55.82        20.94 o
   0  14   5       1567.17       1654.91        53.47 o
   1  14   5         33.07          8.12        33.26 o
   2  14   5        311.68        305.40        55.65 o
   3  14   5        429.24        473.04        63.80 o
   0   0   6      71349.23      66623.88      1155.93 o
   1   0   6          3.03         21.58         4.21 o
   2   0   6        502.23        276.78        13.32 o
   3   0   6       4741.87       4408.15        84.75 o
   4   0   6      11870.01      10756.77       195.37 o
   5   0   6        657.52        406.78        17.55 o
   6   0   6         50.69         62.90         9.00 o
   7   0   6       2981.01       2992.51        58.85 o
   8   0   6         16.36         51.70        12.49 o
   9   0   6        160.24        231.48        16.24 o
  10   0   6       1148.86       1175.17        33.45 o
  11   0   6        417.45        416.97        22.86 o
  12   0   6        598.45        704.08        34.55 o
  13   0   6        672.14        874.82        78.05 o
 -12   1   6        357.73        391.35        27.51 o
 -11   1   6        317.82        369.12        23.63 o
 -10   1   6        291.88        336.15        21.68 o
  -9   1   6        431.85        465.37        21.30 o
  -8   1   6        390.74        400.66        20.07 o
  -7   1   6       2341.81       2298.37        48.52 o
  -6   1   6       1928.79       1590.69        39.37 o
  -5   1   6        212.55        176.41        11.73 o
  -4   1   6        140.59        212.93        14.98 o
  -3   1   6        185.72        230.30        11.59 o
  -2   1   6       3915.42       3233.43        55.56 o
  -1   1   6       7238.33       6972.03       101.39 o
   0   1   6        622.46        587.97        24.37 o
   1   1   6       7172.63       6836.88       132.67 o
   2   1   6       3918.65       3243.49        55.94 o
   3   1   6        197.24        250.77        16.36 o
   4   1   6        141.25        196.50        14.56 o
   5   1   6        211.56        191.10        15.84 o
   6   1   6       1918.27       1558.90        43.84 o
   7   1   6       2382.68       2277.98        48.00 o
   8   1   6        391.09        422.04        19.15 o
   9   1   6        435.41        464.48        24.90 o
  10   1   6        289.91        321.73        19.74 o
  11   1   6        320.38        358.64        21.55 o
  12   1   6        356.27        352.76        23.27 o
 -12   2   6        437.00        400.48        33.60 o
 -11   2   6         54.14         36.49        14.77 o
 -10   2   6        323.28        372.23        19.91 o
  -9   2   6       1701.31       1592.82        36.55 o
  -8   2   6        313.39        352.74        16.65 o
  -7   2   6         56.18         58.47        10.98 o
  -6   2   6       2825.02       2801.74        61.00 o
  -5   2   6       8214.25       8443.04       155.96 o
  -4   2   6       2246.01       2095.78        41.52 o
  -3   2   6       2642.89       2718.04        54.71 o
  -2   2   6         31.58         62.11         8.47 o
  -1   2   6        341.38        284.47        13.07 o
   0   2   6       7154.63       5749.96        93.46 o
   1   2   6        339.34        296.73        13.75 o
   2   2   6         32.15         52.25         7.60 o
   3   2   6       2670.44       2861.44        70.24 o
   4   2   6       2236.20       2074.73        47.71 o
   5   2   6       8104.97       8270.10       137.48 o
   6   2   6       2825.58       2913.96        56.99 o
   7   2   6         56.58         34.60        10.92 o
   8   2   6        313.52        342.77        19.61 o
   9   2   6       1684.06       1574.21        38.80 o
  10   2   6        321.85        378.13        21.79 o
  11   2   6         51.18         25.93        14.06 o
  12   2   6        436.48        455.31        26.60 o
 -12   3   6        246.21        231.90        19.85 o
 -11   3   6        123.47        151.02        19.85 o
 -10   3   6        709.22        601.62        23.77 o
  -9   3   6       1194.30       1181.75        33.92 o
  -8   3   6        438.41        472.80        41.10 o
  -7   3   6        352.22        354.72        20.23 o
  -6   3   6        350.42        431.78        25.12 o
  -5   3   6        766.69        739.90        25.28 o
  -4   3   6       3777.33       4352.40        77.66 o
  -3   3   6       9409.15       8952.53       146.86 o
  -2   3   6       3532.57       3590.91        71.41 o
  -1   3   6       7057.77       6925.03       127.10 o
   0   3   6        245.36        285.94        15.09 o
   1   3   6       6997.69       6844.01       126.43 o
   2   3   6       3529.93       3547.94        71.01 o
   3   3   6       9417.33       8835.47       187.07 o
   4   3   6       3777.22       4334.89        77.44 o
   5   3   6        762.26        748.52        24.03 o
   6   3   6        353.98        413.78        19.82 o
   7   3   6        364.87        392.47        20.36 o
   8   3   6        439.01        438.55        22.31 o
   9   3   6       1187.32       1253.57        34.95 o
  10   3   6        709.48        618.04        29.49 o
  11   3   6        122.59        148.50        17.72 o
  12   3   6        245.42        240.32        26.52 o
 -12   4   6         59.58         35.12        22.82 o
 -11   4   6        184.92        155.03        16.85 o
 -10   4   6        843.70        805.96        27.72 o
  -9   4   6        369.46        465.08        32.49 o
  -8   4   6       1227.60       1174.59        38.33 o
  -7   4   6        698.08        628.22        27.12 o
  -6   4   6        451.81        406.53        21.83 o
  -5   4   6       1664.57       1316.65        34.03 o
  -4   4   6        307.29        395.29        19.84 o
  -3   4   6       7888.04       7916.53       133.10 o
  -2   4   6       2786.63       2953.52        57.73 o
  -1   4   6       2206.98       2209.51        48.90 o
   0   4   6        409.27        279.10        16.07 o
   1   4   6       2189.32       2113.19        48.45 o
   2   4   6       2779.49       2962.15        63.37 o
   3   4   6       7880.39       7805.37       168.19 o
   4   4   6        310.53        374.67        22.74 o
   5   4   6       1660.44       1349.41        38.25 o
   6   4   6        452.07        447.73        19.57 o
   7   4   6        694.56        574.84        25.04 o
   8   4   6       1221.58       1224.13        36.22 o
   9   4   6        385.11        495.14        34.90 o
  10   4   6        842.07        832.16        31.58 o
  11   4   6        187.90        140.57        18.94 o
  12   4   6         59.80         49.95        21.34 o
 -12   5   6         31.04         48.08        25.94 o
 -11   5   6        357.22        340.65        34.34 o
 -10   5   6        234.97        247.85        20.81 o
  -9   5   6       1639.82       1567.80        48.21 o
  -8   5   6        309.44        346.11        23.88 o
  -7   5   6       2541.94       2235.29        56.65 o
  -6   5   6        381.77        316.65        26.45 o
  -5   5   6        492.43        517.83        24.05 o
  -4   5   6        809.35        690.56        25.90 o
  -3   5   6         78.85        165.28        14.84 o
  -2   5   6       1402.36       1292.68        33.93 o
  -1   5   6        598.32        536.22        27.82 o
   0   5   6         21.92         20.95        10.33 o
   1   5   6        593.42        504.46        24.73 o
   2   5   6       1411.74       1387.31        39.84 o
   3   5   6         89.18        153.10        16.86 o
   4   5   6        806.93        612.82        59.51 o
   5   5   6        488.53        498.44        24.85 o
   6   5   6        384.18        317.56        21.54 o
   7   5   6       2542.95       2201.35        58.00 o
   8   5   6        312.29        331.38        21.78 o
   9   5   6       1649.34       1660.07        42.73 o
  10   5   6        235.55        241.42        21.58 o
  11   5   6        359.43        345.00        25.17 o
  12   5   6         31.97         22.20        26.07 o
 -11   6   6        169.87        189.51        19.00 o
 -10   6   6         20.88         67.36        19.46 o
  -9   6   6       1009.13       1127.85        60.15 o
  -8   6   6         85.23         81.08        17.32 o
  -7   6   6       1252.99       1374.60        43.66 o
  -6   6   6        451.29        483.67        31.60 o
  -5   6   6        611.93        635.82        35.62 o
  -4   6   6       1653.88       1699.89        53.02 o
  -3   6   6       1981.64       2231.77        50.20 o
  -2   6   6       1457.23       1487.54        49.96 o
  -1   6   6       2264.26       2025.55        59.83 o
   0   6   6       8924.96       9984.85       185.29 o
   1   6   6       2298.94       1959.28        51.31 o
   2   6   6       1462.38       1438.72        42.47 o
   3   6   6       1974.92       2184.35        61.41 o
   4   6   6       1650.59       1687.59        51.89 o
   5   6   6        615.93        621.36        28.76 o
   6   6   6        452.00        484.51        26.65 o
   7   6   6       1250.36       1367.08        43.95 o
   8   6   6         86.65         72.35        17.05 o
   9   6   6        997.58       1066.30        41.56 o
  10   6   6         20.95         50.79        16.20 o
  11   6   6        167.98        211.20        23.86 o
 -11   7   6          8.29         38.35        20.24 o
 -10   7   6        279.94        320.25        29.81 o
  -9   7   6        121.18        141.11        22.71 o
  -8   7   6        146.00        131.24        20.59 o
  -7   7   6        136.97        141.81        22.80 o
  -6   7   6        589.75        687.65        31.13 o
  -5   7   6       2164.49       2075.48        51.31 o
  -4   7   6        360.45        430.12        24.46 o
  -3   7   6        654.52        680.43        28.49 o
  -2   7   6        632.24        783.20        29.11 o
  -1   7   6       1136.57       1314.18        37.18 o
   0   7   6       1390.52       1666.92        84.12 o
   1   7   6       1157.84       1358.70        64.46 o
   2   7   6        633.55        672.93        31.97 o
   3   7   6        655.27        605.43        32.43 o
   4   7   6        361.17        432.63        28.98 o
   5   7   6       2158.49       2086.85        55.78 o
   6   7   6        592.11        683.82        35.36 o
   7   7   6        127.00        149.35        21.43 o
   8   7   6        146.77         77.56        20.45 o
   9   7   6        119.07        164.91        24.50 o
  10   7   6        280.37        351.70        45.45 o
  11   7   6          8.85         25.75        20.78 o
 -10   8   6        229.97        275.54        52.31 o
  -9   8   6        664.12        671.90        71.34 o
  -8   8   6        225.14        252.18        32.48 o
  -7   8   6        314.24        390.80        27.16 o
  -6   8   6        705.27        694.20        35.83 o
  -5   8   6       1113.91       1072.97        37.68 o
  -4   8   6        841.59        835.34        32.76 o
  -3   8   6        474.58        537.91        27.29 o
  -2   8   6        740.30        753.26        30.64 o
  -1   8   6         98.13        130.34        16.74 o
   0   8   6       2582.22       2507.79        62.25 o
   1   8   6         91.03        119.92        22.81 o
   2   8   6        737.18        756.36        46.25 o
   3   8   6        471.04        542.15        39.93 o
   4   8   6        843.44        833.31        45.01 o
   5   8   6       1145.88       1063.89        50.22 o
   6   8   6        699.23        663.71        36.98 o
   7   8   6        314.82        350.35        28.58 o
   8   8   6        224.58        266.97        27.46 o
   9   8   6        657.69        611.75        43.61 o
  10   8   6        232.55        221.45        29.23 o
 -10   9   6         40.60         49.69        29.53 o
  -9   9   6        201.88        155.89        43.98 o
  -8   9   6        222.27        184.23        24.87 o
  -7   9   6       1307.43       1312.80        48.77 o
  -6   9   6        612.43        665.88        34.66 o
  -5   9   6        267.83        296.15        24.54 o
  -4   9   6        550.57        643.54        32.00 o
  -3   9   6        638.64        639.18        30.83 o
  -2   9   6        654.11        752.63        43.78 o
  -1   9   6       1393.17       1436.40        56.02 o
   0   9   6         13.49         34.81        13.61 o
   1   9   6       1381.79       1433.74        56.80 o
   2   9   6        650.95        716.68        81.44 o
   3   9   6        648.39        572.22        44.19 o
   4   9   6        550.85        601.89        53.95 o
   5   9   6        264.92        277.60        32.58 o
   6   9   6        609.05        700.90        44.67 o
   7   9   6       1288.84       1324.20        53.24 o
   8   9   6        223.33        201.42        38.59 o
   9   9   6        203.84        229.04        30.32 o
  10   9   6         40.08          6.12        21.11 o
  -9  10   6        208.72        210.24        41.19 o
  -8  10   6        243.61        335.77        31.42 o
  -7  10   6        322.75        313.27        29.75 o
  -6  10   6         16.03         11.97        18.11 o
  -5  10   6        410.44        416.43        28.70 o
  -4  10   6        500.64        469.94        29.08 o
  -3  10   6       1063.58        998.07        39.40 o
  -2  10   6        723.13        812.30        35.91 o
  -1  10   6        960.57        876.18        52.39 o
   0  10   6       1145.77       1246.65        36.50 o
   1  10   6        958.72        869.24        59.70 o
   2  10   6        726.62        667.82        82.12 o
   3  10   6       1075.14       1049.58        72.62 o
   4  10   6        498.95        536.81        43.37 o
   5  10   6        412.99        381.19        37.81 o
   6  10   6         15.67         20.50        31.56 o
   7  10   6        321.59        322.73        31.62 o
   8  10   6        241.57        375.63        50.31 o
   9  10   6        200.73        188.65        27.78 o
  -8  11   6        311.83        318.45        52.94 o
  -7  11   6        965.86        942.84       105.22 o
  -6  11   6        152.77        179.03        27.43 o
  -5  11   6        396.53        381.03        23.13 o
  -4  11   6        102.91        107.23        22.13 o
  -3  11   6        401.43        386.88        27.84 o
  -2  11   6        345.37        325.94        29.23 o
  -1  11   6       2873.50       2988.69        71.61 o
   0  11   6          3.12          8.25        15.06 o
   1  11   6       2894.15       2873.90        90.71 o
   2  11   6        347.30        358.87        40.91 o
   3  11   6        403.35        446.57        74.65 o
   4  11   6        104.95        124.60        30.80 o
   5  11   6        395.03        387.33       118.77 o
   6  11   6        153.32        210.72        42.42 o
   7  11   6        980.49        988.69        57.87 o
   8  11   6        309.58        262.80        34.85 o
  -7  12   6         83.98         87.47        27.07 o
  -6  12   6          0.68        -17.88        21.35 o
  -5  12   6        965.87        942.46        46.12 o
  -4  12   6        284.20        310.73        29.89 o
  -3  12   6        247.66        235.01        44.18 o
  -2  12   6        648.81        545.18        33.79 o
  -1  12   6       1549.90       1598.57        44.59 o
   0  12   6          0.19         24.08        15.98 o
   1  12   6       1577.45       1524.83        94.58 o
   2  12   6        645.23        600.37        46.32 o
   3  12   6        243.34        177.13        58.37 o
   4  12   6        283.60        353.05        40.76 o
   5  12   6        966.92        882.52        59.68 o
   6  12   6          0.80         16.41        40.04 o
   7  12   6         84.30         98.88        44.45 o
  -6  13   6         51.72         42.02        27.37 o
  -5  13   6        350.53        416.84        38.21 o
  -4  13   6        108.62        109.96        24.65 o
  -3  13   6        233.54        252.64        28.50 o
  -2  13   6        529.77        495.13        34.48 o
  -1  13   6        247.44        294.13        24.19 o
   0  13   6        262.85        273.00        23.52 o
   1  13   6        247.49        307.06        37.68 o
   2  13   6        529.96        498.98        44.23 o
   3  13   6        229.61        319.37        56.67 o
   4  13   6        110.15         46.83        51.58 o
   5  13   6        352.11        329.84        51.58 o
   6  13   6         51.12         67.19        40.72 o
  -4  14   6        266.56        200.58        35.80 o
  -3  14   6         57.40         79.27        33.63 o
  -2  14   6         38.24         47.72        24.13 o
  -1  14   6        336.58        313.50        27.90 o
   0  14   6        246.51        269.24        26.19 o
   1  14   6        334.34        375.99        57.69 o
   2  14   6         38.99         14.25        42.08 o
   3  14   6         56.69        154.06        47.51 o
   1   0   7        445.78        529.10        13.06 o
   2   0   7        871.24       1179.34        24.31 o
   3   0   7        539.91        613.97        20.88 o
   4   0   7        130.85        118.68        14.11 o
   5   0   7       1184.38       1149.84        34.09 o
   6   0   7        215.74        276.47        13.89 o
   7   0   7       1001.19       1042.87        28.27 o
   8   0   7          0.17          0.76         9.08 o
   9   0   7       2005.05       2136.60        45.44 o
  10   0   7        965.31       1122.90        34.25 o
  11   0   7        105.44        191.56        29.73 o
  12   0   7         68.30         73.03        21.99 o
 -12   1   7        696.24        635.78        34.74 o
 -11   1   7        143.82        151.13        17.58 o
 -10   1   7        568.50        475.44        24.14 o
  -9   1   7        586.74        594.41        23.30 o
  -8   1   7        148.43        152.59        12.87 o
  -7   1   7         56.35         69.49        10.43 o
  -6   1   7       1684.73       1633.84        36.87 o
  -5   1   7       4731.97       4005.70        95.71 o
  -4   1   7       4064.66       3817.79        68.07 o
  -3   1   7        669.01        511.73        16.34 o
  -2   1   7       4562.55       4128.85        62.76 o
  -1   1   7       6298.99       5616.45        82.87 o
   0   1   7      19533.16      17097.05       210.43 o
   1   1   7       6234.68       5535.44        90.08 o
   2   1   7       4565.64       4008.31       127.58 o
   3   1   7        670.67        558.24        26.45 o
   4   1   7       4064.86       3854.43        77.92 o
   5   1   7       4757.05       3982.97        82.23 o
   6   1   7       1683.64       1666.10        48.10 o
   7   1   7         57.06         59.17        10.20 o
   8   1   7        149.08        132.60        16.64 o
   9   1   7        578.34        610.85        23.97 o
  10   1   7        568.53        436.76        22.33 o
  11   1   7        147.98        164.82        17.60 o
  12   1   7        697.00        675.82        39.28 o
 -12   2   7        151.44        141.38        22.57 o
 -11   2   7          0.31        -11.18        13.33 o
 -10   2   7        160.89        192.16        18.32 o
  -9   2   7        219.61        191.86        14.58 o
  -8   2   7         51.18         43.53        13.04 o
  -7   2   7        364.62        347.40        16.13 o
  -6   2   7         59.53         62.88        23.41 o
  -5   2   7         25.40         42.01        12.27 o
  -4   2   7       4298.75       4296.11        85.74 o
  -3   2   7       3025.10       2796.22        67.73 o
  -2   2   7        717.21        718.11        21.94 o
  -1   2   7        663.45        685.58        19.26 o
   0   2   7       1139.17       1278.86        29.30 o
   1   2   7        671.20        757.35        39.41 o
   2   2   7        715.68        692.70        24.88 o
   3   2   7       3025.10       3037.31        73.27 o
   4   2   7       4294.58       4312.40        86.19 o
   5   2   7         24.69         42.72        11.17 o
   6   2   7         59.22         58.32        10.54 o
   7   2   7        346.42        329.10        18.28 o
   8   2   7         51.10         39.41        11.84 o
   9   2   7        223.06        213.13        16.76 o
  10   2   7        160.47        138.77        16.59 o
  11   2   7          0.12          0.61        13.30 o
  12   2   7        151.37        172.22        24.28 o
 -12   3   7        227.71        214.04        23.25 o
 -11   3   7        655.69        612.12        26.78 o
 -10   3   7         49.40         40.99        11.78 o
  -9   3   7       2109.14       1982.29        42.22 o
  -8   3   7        590.72        595.61        22.60 o
  -7   3   7       2079.93       2085.38        65.93 o
  -6   3   7       5470.11       5479.74       107.84 o
  -5   3   7       3288.93       2891.93        56.37 o
  -4   3   7       7662.06       7704.91       130.52 o
  -3   3   7        616.26        757.72        22.58 o
  -2   3   7       3419.01       3988.36        78.23 o
  -1   3   7       1102.45       1357.96        32.23 o
   0   3   7       3595.02       4034.86        69.23 o
   1   3   7       1105.32       1475.82        58.78 o
   2   3   7       3421.68       3911.56        98.94 o
   3   3   7        603.97        804.79        29.40 o
   4   3   7       7652.15       7757.60       145.75 o
   5   3   7       3266.76       2817.33        55.41 o
   6   3   7       5483.52       5390.54        95.91 o
   7   3   7       2082.51       2000.24        45.72 o
   8   3   7        589.23        625.37        26.72 o
   9   3   7       2094.25       2026.72        49.49 o
  10   3   7         50.42         45.47        14.06 o
  11   3   7        650.76        594.57        28.11 o
  12   3   7        226.30        219.11        40.36 o
 -12   4   7         14.84         10.88        18.42 o
 -11   4   7        331.79        361.57        26.69 o
 -10   4   7        146.18        169.36        18.69 o
  -9   4   7        632.42        655.73        27.31 o
  -8   4   7        743.80        783.93        31.05 o
  -7   4   7        655.51        625.57        26.97 o
  -6   4   7        328.78        317.98        18.67 o
  -5   4   7       1843.39       1968.20        44.02 o
  -4   4   7       1607.52       1502.36        45.11 o
  -3   4   7       3628.84       4511.05        81.29 o
  -2   4   7       1162.71       1242.58        41.14 o
  -1   4   7       2442.82       2285.05        50.08 o
   0   4   7          2.03          1.85         9.63 o
   1   4   7       2465.70       2211.82        69.26 o
   2   4   7       1162.36       1212.84        50.25 o
   3   4   7       3656.62       4441.31       102.02 o
   4   4   7       1603.58       1549.08        46.30 o
   5   4   7       1853.42       1895.73        42.90 o
   6   4   7        329.34        321.43        18.80 o
   7   4   7        653.22        615.06        25.64 o
   8   4   7        743.95        779.57        33.44 o
   9   4   7        633.87        694.04        30.35 o
  10   4   7        146.77        149.44        17.96 o
  11   4   7        337.27        356.20        34.45 o
  12   4   7         14.45         14.25        38.01 o
 -12   5   7         17.97         35.04        21.38 o
 -11   5   7        136.03        145.09        20.04 o
 -10   5   7         10.32         98.63        46.60 o
  -9   5   7        228.82        243.02        21.68 o
  -8   5   7        130.28        183.21        24.00 o
  -7   5   7        438.61        428.33        36.27 o
  -6   5   7        736.48        751.50        28.03 o
  -5   5   7       2288.45       2337.86        51.52 o
  -4   5   7       1030.60       1087.31        31.76 o
  -3   5   7        192.46        190.31        15.78 o
  -2   5   7       9745.98      10030.18       166.81 o
  -1   5   7       3989.17       4151.40        84.10 o
   0   5   7       6852.38       7747.05       146.43 o
   1   5   7       4046.05       4286.96        88.30 o
   2   5   7       9749.45       9826.91       183.52 o
   3   5   7        188.00        172.06        17.61 o
   4   5   7       1029.09       1136.68        51.85 o
   5   5   7       2334.62       2354.30        65.09 o
   6   5   7        735.62        706.45        27.28 o
   7   5   7        440.11        470.65        28.27 o
   8   5   7        130.11        154.01        17.86 o
   9   5   7        226.67        240.37        20.87 o
  10   5   7         10.21         39.04        17.96 o
  11   5   7        135.71        139.00        19.75 o
  12   5   7         17.79          7.47        34.61 o
 -11   6   7        619.16        667.56        34.95 o
 -10   6   7        862.49        876.47       100.39 o
  -9   6   7       1813.89       1754.25        52.75 o
  -8   6   7         91.00         86.99        17.69 o
  -7   6   7        431.79        367.96        23.97 o
  -6   6   7       1128.05       1260.41        37.90 o
  -5   6   7        321.25        405.00        22.75 o
  -4   6   7         34.89         21.70        12.35 o
  -3   6   7       5935.76       6489.00       115.56 o
  -2   6   7       1443.10       1395.44        36.97 o
  -1   6   7       9692.63       9851.57       326.89 o
   0   6   7        177.18        276.87        35.03 o
   1   6   7       9738.65       9828.08       164.69 o
   2   6   7       1438.49       1372.95        41.33 o
   3   6   7       5869.49       6202.04       140.97 o
   4   6   7         34.65         37.02        14.33 o
   5   6   7        317.57        384.59        38.02 o
   6   6   7       1129.82       1227.97        40.44 o
   7   6   7        425.10        382.03        25.59 o
   8   6   7         91.36         85.37        16.43 o
   9   6   7       1807.92       1738.66        48.06 o
  10   6   7        859.94        776.99        30.70 o
  11   6   7        613.81        611.64        59.31 o
 -11   7   7        235.23        201.37        32.74 o
 -10   7   7        179.90        195.17        25.33 o
  -9   7   7       1515.45       1514.65        55.21 o
  -8   7   7        193.78        229.49        22.89 o
  -7   7   7        995.20       1484.01        47.77 o
  -6   7   7        539.38        598.45        30.19 o
  -5   7   7        506.72        470.62        25.98 o
  -4   7   7        840.21        891.62        32.39 o
  -3   7   7       1471.99       1557.29        41.39 o
  -2   7   7       1829.24       2086.41        49.07 o
  -1   7   7       2498.00       2674.69        75.13 o
   0   7   7        271.45        243.80        20.73 o
   1   7   7       2537.84       2529.76        62.99 o
   2   7   7       1832.62       1966.29        74.74 o
   3   7   7       1490.97       1582.78        52.31 o
   4   7   7        839.88        807.21        37.44 o
   5   7   7        523.60        509.82        31.81 o
   6   7   7        541.03        573.08        30.32 o
   7   7   7        997.43       1296.97        84.16 o
   8   7   7        194.99        182.57        34.23 o
   9   7   7       1527.49       1509.29        49.04 o
  10   7   7        181.67        195.64        50.91 o
  11   7   7        235.59        228.33        57.35 o
 -10   8   7         58.14         78.14        21.49 o
  -9   8   7         38.00         49.49        19.82 o
  -8   8   7        959.49        946.85        39.16 o
  -7   8   7        243.55        240.49        26.76 o
  -6   8   7       1344.36       1273.20        42.11 o
  -5   8   7        185.69        174.35        29.38 o
  -4   8   7        159.90        175.63        19.03 o
  -3   8   7       1260.50       1136.43        36.72 o
  -2   8   7        921.26        876.68        32.42 o
  -1   8   7        224.01        277.69        20.45 o
   0   8   7         85.17         87.07        25.39 o
   1   8   7        215.83        240.00        26.97 o
   2   8   7        918.33        817.41        41.13 o
   3   8   7       1257.13       1141.76        88.23 o
   4   8   7        161.29        211.07        26.25 o
   5   8   7        186.73        171.13        25.57 o
   6   8   7       1343.29       1312.89        57.70 o
   7   8   7        238.15        216.60        25.91 o
   8   8   7        957.44        972.85        45.98 o
   9   8   7         36.72         12.15        19.75 o
  10   8   7         57.92         77.37        24.32 o
 -10   9   7          0.45         11.78        24.52 o
  -9   9   7        500.81        550.38        45.58 o
  -8   9   7        214.85        209.11        25.84 o
  -7   9   7         28.70         17.14        17.67 o
  -6   9   7        136.42        115.64        20.39 o
  -5   9   7        659.08        684.52        37.08 o
  -4   9   7       1720.50       1679.96        48.24 o
  -3   9   7        815.67        849.51        34.52 o
  -2   9   7        102.15        147.20        18.30 o
  -1   9   7        806.98        852.07        33.80 o
   0   9   7       1120.95       1271.39        36.02 o
   1   9   7        788.73        704.31        45.95 o
   2   9   7        103.92        129.23        26.06 o
   3   9   7        805.24        900.84        74.32 o
   4   9   7       1716.79       1653.18        68.20 o
   5   9   7        661.31        575.87        43.37 o
   6   9   7        134.02         77.54        24.35 o
   7   9   7         28.85         21.17        22.13 o
   8   9   7        215.17        156.52        25.20 o
   9   9   7        491.61        525.93        50.88 o
  10   9   7          0.47        -23.64        31.49 o
  -9  10   7         56.95         29.71        23.53 o
  -8  10   7        326.13        298.96        32.82 o
  -7  10   7        364.77        360.04        30.73 o
  -6  10   7        282.64        262.42        25.40 o
  -5  10   7        215.64        189.93        23.56 o
  -4  10   7        137.91        180.54        23.67 o
  -3  10   7        352.84        378.13        26.63 o
  -2  10   7        129.25        157.85        20.80 o
  -1  10   7       1237.76       1272.43        43.15 o
   0  10   7        570.17        550.99        25.96 o
   1  10   7       1259.35       1311.63        58.34 o
   2  10   7        129.96         50.22        44.79 o
   3  10   7        356.07        352.22        53.62 o
   4  10   7        138.08        138.49        29.32 o
   5  10   7        217.15        232.86        33.00 o
   6  10   7        282.39        260.09        33.41 o
   7  10   7        372.41        405.90        38.74 o
   8  10   7        328.36        370.38        37.50 o
   9  10   7         58.26         52.64        30.94 o
  -8  11   7         51.65        105.73        26.70 o
  -7  11   7        216.88        207.60        30.64 o
  -6  11   7        547.51        571.01        36.80 o
  -5  11   7         93.73         99.76        26.81 o
  -4  11   7        250.64        226.47        24.68 o
  -3  11   7        365.78        320.35        26.26 o
  -2  11   7         12.72         35.01        18.46 o
  -1  11   7        767.26        784.84        37.24 o
   0  11   7        267.04        183.88        22.81 o
   1  11   7        775.42        868.16        53.46 o
   2  11   7         12.99          8.51        26.84 o
   3  11   7        364.36        395.67        67.87 o
   4  11   7        249.88        222.35        72.96 o
   5  11   7         86.79         76.80        50.90 o
   6  11   7        546.49        525.67        68.55 o
   7  11   7        216.19        201.80        32.45 o
   8  11   7         51.65         63.46        62.44 o
  -7  12   7         99.83         67.13        26.60 o
  -6  12   7        191.72        141.44        21.06 o
  -5  12   7        109.31        134.97        24.82 o
  -4  12   7        381.37        432.85        32.66 o
  -3  12   7        204.65        241.37        27.01 o
  -2  12   7         86.60         79.07        20.73 o
  -1  12   7         21.12         49.01        27.37 o
   0  12   7         27.10         34.25        15.83 o
   1  12   7         18.96         -0.85        34.59 o
   2  12   7         86.75         81.37        28.86 o
   3  12   7        211.95        177.81        55.65 o
   4  12   7        379.34        449.42        44.90 o
   5  12   7        107.71         99.30        43.77 o
   6  12   7        191.32        199.07        35.76 o
   7  12   7        104.61         44.79        38.68 o
  -6  13   7        291.54        306.08        62.52 o
  -5  13   7        587.25        575.91        43.81 o
  -4  13   7         31.86         -6.06        20.44 o
  -3  13   7        296.60        313.37        30.37 o
  -2  13   7        124.82        144.79        29.65 o
  -1  13   7        237.20        289.62        24.87 o
   0  13   7          0.28         24.36        20.00 o
   1  13   7        232.75        250.46        48.62 o
   2  13   7        123.67        105.32        32.10 o
   3  13   7        297.51        299.22        37.61 o
   4  13   7         32.04         59.04        59.04 o
   5  13   7        587.79        525.30        73.98 o
  -4  14   7        262.95        222.61        70.58 o
  -3  14   7        383.57        356.00        58.14 o
  -2  14   7        152.05        139.07        28.34 o
  -1  14   7        107.29        124.17        21.86 o
   0  14   7         29.77         26.44        23.47 o
   1  14   7        103.41        188.67        50.22 o
   2  14   7        152.42        109.27        48.19 o
   3  14   7        379.13        335.27        59.04 o
   0   0   8      23470.20      25289.04       438.42 o
   1   0   8      11459.14       8878.92       118.98 o
   2   0   8         98.95        107.06         6.35 o
   3   0   8       1196.26        814.16        24.66 o
   4   0   8       1489.29       1536.71        43.98 o
   5   0   8        413.09        326.95        26.89 o
   6   0   8       2578.30       2548.55        59.75 o
   7   0   8        206.10        177.16        17.95 o
   8   0   8        443.14        448.00        19.86 o
   9   0   8        458.75        522.98        21.79 o
  10   0   8       1508.51       1276.91        34.86 o
  11   0   8       4118.38       4192.45        78.36 o
  12   0   8          3.60        114.32        24.39 o
 -12   1   8         31.99         48.15        23.48 o
 -11   1   8        614.93        722.56        32.55 o
 -10   1   8        142.85        156.71        15.17 o
  -9   1   8       1643.46       1520.05        36.75 o
  -8   1   8       2887.00       2678.59        56.14 o
  -7   1   8        623.79        570.54        21.23 o
  -6   1   8       1222.32       1208.40        30.06 o
  -5   1   8         46.68         57.01        14.50 o
  -4   1   8       2181.49       2068.08        48.08 o
  -3   1   8        489.95        590.86        17.45 o
  -2   1   8        755.35        837.33        25.24 o
  -1   1   8       1963.98       1913.53        31.63 o
   0   1   8       2914.88       2809.30        37.77 o
   1   1   8       1998.74       1934.46        32.49 o
   2   1   8        758.70        883.85        20.91 o
   3   1   8        476.27        558.09        18.17 o
   4   1   8       2173.26       2007.12        46.96 o
   5   1   8         46.02         71.16        12.41 o
   6   1   8       1215.39       1155.56        36.25 o
   7   1   8        636.63        560.91        28.41 o
   8   1   8       2882.56       2706.17        57.86 o
   9   1   8       1643.71       1547.92        40.46 o
  10   1   8        143.22        131.00        15.33 o
  11   1   8        629.68        662.23        27.84 o
  12   1   8         31.12         65.17        20.94 o
 -12   2   8        207.67        199.57        28.58 o
 -11   2   8         30.08         -4.86        14.58 o
 -10   2   8        336.16        379.73        24.06 o
  -9   2   8       1431.59       1445.33        43.70 o
  -8   2   8          8.17         -8.07         8.22 o
  -7   2   8        111.47        102.86        13.20 o
  -6   2   8        509.58        512.30        26.04 o
  -5   2   8        936.02        672.85        40.67 o
  -4   2   8       1512.75       1598.17        60.57 o
  -3   2   8       1944.35       1770.27        40.67 o
  -2   2   8       2933.10       2793.53        86.30 o
  -1   2   8       7669.28       6876.80       124.76 o
   0   2   8        106.07        116.13         7.55 o
   1   2   8       7603.85       6715.12        99.96 o
   2   2   8       2923.58       2736.02        50.15 o
   3   2   8       1951.61       1810.51        37.93 o
   4   2   8       1517.46       1662.26        51.53 o
   5   2   8        926.95        625.91        25.81 o
   6   2   8        512.40        484.53        24.48 o
   7   2   8        112.14         98.63        15.94 o
   8   2   8          7.98         -2.43        11.24 o
   9   2   8       1420.21       1413.81        39.03 o
  10   2   8        338.60        387.83        30.91 o
  11   2   8         30.83          7.53        17.25 o
  12   2   8        207.33        168.41        25.76 o
 -12   3   8        549.48        482.57        38.74 o
 -11   3   8         33.32         49.26        13.94 o
 -10   3   8        885.36        889.64        38.00 o
  -9   3   8       2069.84       2019.87        46.53 o
  -8   3   8        607.55        610.45        23.03 o
  -7   3   8       1375.97       1262.54        36.54 o
  -6   3   8       2660.25       2467.68        57.28 o
  -5   3   8        176.34        204.28        13.75 o
  -4   3   8       1152.39       1220.95        33.46 o
  -3   3   8       7363.44       6899.49       115.60 o
  -2   3   8       3502.81       3587.12        71.61 o
  -1   3   8       3301.13       2929.08        58.84 o
   0   3   8       4159.55       4321.40        73.78 o
   1   3   8       3291.03       2911.10        52.95 o
   2   3   8       3492.26       3552.84        71.63 o
   3   3   8       7375.45       7201.82       121.16 o
   4   3   8       1152.00       1258.45        35.28 o
   5   3   8        175.86        175.05        15.95 o
   6   3   8       2661.47       2404.80        50.60 o
   7   3   8       1396.12       1309.15        41.15 o
   8   3   8        611.13        563.44        25.14 o
   9   3   8       2067.62       2129.59        54.58 o
  10   3   8        887.22        901.06        31.48 o
  11   3   8         32.98         50.38        15.78 o
  12   3   8        549.73        547.86        44.86 o
 -12   4   8         39.02          9.65        32.33 o
 -11   4   8        585.74        670.51        32.82 o
 -10   4   8        190.49        179.80        17.26 o
  -9   4   8        562.87        545.82        34.29 o
  -8   4   8        472.86        479.04        24.88 o
  -7   4   8        502.90        516.53        22.95 o
  -6   4   8        110.16        120.62        16.24 o
  -5   4   8        527.34        562.87        22.88 o
  -4   4   8       5524.81       5843.68       117.57 o
  -3   4   8        810.76        983.33        27.89 o
  -2   4   8       5126.46       5415.94       104.81 o
  -1   4   8       3506.89       3537.51        81.60 o
   0   4   8        208.84        623.93        52.02 o
   1   4   8       3485.35       3398.78        62.76 o
   2   4   8       5131.55       5227.88       102.34 o
   3   4   8        797.44        976.46        48.39 o
   4   4   8       5529.82       5866.42       132.26 o
   5   4   8        503.54        497.15        24.69 o
   6   4   8        109.88        137.42        17.04 o
   7   4   8        504.13        532.09        24.60 o
   8   4   8        471.97        494.15        25.20 o
   9   4   8        580.64        596.11        28.66 o
  10   4   8        187.75        198.60        19.59 o
  11   4   8        581.01        673.72        34.62 o
  12   4   8         38.61         28.63        30.01 o
 -11   5   8        364.19        397.42        45.37 o
 -10   5   8         65.67         73.45        15.93 o
  -9   5   8        102.73        171.44        19.81 o
  -8   5   8        235.07        233.56        23.97 o
  -7   5   8       1717.40       1631.68        42.51 o
  -6   5   8       1087.47       1039.78        32.65 o
  -5   5   8        657.00        659.20        30.70 o
  -4   5   8        309.72        388.40        22.86 o
  -3   5   8       1391.17       1250.37        33.47 o
  -2   5   8       2968.85       3436.26        77.26 o
  -1   5   8       2965.49       3484.99        72.82 o
   0   5   8        475.13        507.45        35.99 o
   1   5   8       2947.60       3448.67        66.20 o
   2   5   8       2967.24       3314.51        72.26 o
   3   5   8       1415.03       1255.97        37.32 o
   4   5   8        312.13        366.46        27.04 o
   5   5   8        657.30        616.33        45.41 o
   6   5   8       1084.89       1052.59        51.43 o
   7   5   8       1705.98       1662.04        42.97 o
   8   5   8        231.97        215.27        21.30 o
   9   5   8        102.95        181.31        20.76 o
  10   5   8         65.45         67.95        14.47 o
  11   5   8        364.84        342.69        38.68 o
  12   5   8        260.52        251.79        52.94 o
 -11   6   8         15.90         38.04        21.24 o
 -10   6   8        178.15        199.45        40.97 o
  -9   6   8        398.98        454.54        42.60 o
  -8   6   8       1033.07        912.22        34.63 o
  -7   6   8        722.35        708.01        30.29 o
  -6   6   8        771.79        828.84        35.85 o
  -5   6   8       3382.77       3161.40        66.23 o
  -4   6   8        579.79        548.07        28.60 o
  -3   6   8       1504.13       1476.83        38.53 o
  -2   6   8        441.98        485.60        23.09 o
  -1   6   8       1972.64       1705.68        65.04 o
   0   6   8         38.44         82.63        22.97 o
   1   6   8       1938.39       1637.29        39.93 o
   2   6   8        439.69        509.95        26.81 o
   3   6   8       1513.20       1518.80        48.99 o
   4   6   8        580.44        590.54        30.76 o
   5   6   8       3384.81       3097.91        92.56 o
   6   6   8        772.92        799.43        37.48 o
   7   6   8        720.96        692.95        29.86 o
   8   6   8       1035.45        991.35        35.53 o
   9   6   8        398.94        414.19        26.55 o
  10   6   8        176.43        193.51        21.66 o
  11   6   8         16.34         14.24        24.46 o
 -11   7   8        116.85         81.01        36.16 o
 -10   7   8         88.72         87.26        19.97 o
  -9   7   8         65.63        113.33        25.47 o
  -8   7   8       1184.80       1132.85        46.50 o
  -7   7   8        439.02        530.67        28.79 o
  -6   7   8        360.18        347.81        24.06 o
  -5   7   8        269.51        318.13        22.45 o
  -4   7   8       1151.44       1229.21        37.49 o
  -3   7   8       1530.98       1424.66        39.73 o
  -2   7   8        185.49        200.95        18.33 o
  -1   7   8        176.48        159.17        18.63 o
   0   7   8       1722.08       1665.87        59.67 o
   1   7   8        175.94        175.58        19.68 o
   2   7   8        181.07        197.04        23.90 o
   3   7   8       1536.25       1446.91        51.50 o
   4   7   8       1157.71       1275.47        54.65 o
   5   7   8        267.08        322.01        26.15 o
   6   7   8        357.60        358.76        28.02 o
   7   7   8        454.70        530.11        35.04 o
   8   7   8       1195.82       1115.22        50.84 o
   9   7   8         65.24        101.46        20.36 o
  10   7   8         88.22         52.01        21.86 o
  11   7   8        121.36        134.29        35.48 o
 -10   8   8         19.37          7.60        21.56 o
  -9   8   8         31.39         28.46        17.84 o
  -8   8   8        648.16        793.13        36.38 o
  -7   8   8        256.80        282.06        24.37 o
  -6   8   8        435.79        478.31        28.75 o
  -5   8   8         49.23         41.09        16.15 o
  -4   8   8        517.73        802.14        46.91 o
  -3   8   8        782.81        727.27        39.68 o
  -2   8   8         63.92         66.56        15.47 o
  -1   8   8        303.40        434.46        24.68 o
   0   8   8        649.10        693.88        55.15 o
   1   8   8        295.96        409.34        33.21 o
   2   8   8         64.93         43.19        17.29 o
   3   8   8        792.41        790.35        39.54 o
   4   8   8        513.70        748.39        69.22 o
   5   8   8         54.82         61.13        27.21 o
   6   8   8        432.10        427.76        31.68 o
   7   8   8        256.92        298.31        32.12 o
   8   8   8        649.10        753.85        62.74 o
   9   8   8         30.88         29.21        38.23 o
  10   8   8         18.83         47.72        21.48 o
 -10   9   8        102.70         92.93        35.98 o
  -9   9   8        316.47        294.97        31.93 o
  -8   9   8        264.90        255.44        37.40 o
  -7   9   8        688.46        681.85        35.02 o
  -6   9   8        233.94        281.18        24.73 o
  -5   9   8        836.08        854.21        53.12 o
  -4   9   8       1535.98       1579.57        47.37 o
  -3   9   8        216.33        232.66        21.37 o
  -2   9   8        509.48        592.07        30.15 o
  -1   9   8        276.91        295.35        22.10 o
   0   9   8       2317.88       2351.81        74.31 o
   1   9   8        286.11        348.21        32.33 o
   2   9   8        511.97        508.67        36.78 o
   3   9   8        229.26        266.05        32.77 o
   4   9   8       1532.01       1500.55        68.21 o
   5   9   8        834.63        842.62        73.64 o
   6   9   8        236.79        287.51        32.29 o
   7   9   8        683.94        601.09        44.62 o
   8   9   8        263.72        276.69        61.08 o
   9   9   8        316.20        324.69        31.56 o
  10   9   8        102.42         98.96        29.25 o
  -9  10   8         90.79        119.01        27.90 o
  -8  10   8         32.75         33.66        23.33 o
  -7  10   8        418.06        363.68        34.96 o
  -6  10   8        445.97        397.02        35.56 o
  -5  10   8       1266.63       1201.20        45.74 o
  -4  10   8        155.06        146.03        21.06 o
  -3  10   8       1064.34       1045.75        39.91 o
  -2  10   8        345.33        405.54        31.18 o
  -1  10   8       3610.34       3437.14        95.66 o
   0  10   8       1457.58       1286.76        57.40 o
   1  10   8       3595.54       3303.05        96.97 o
   2  10   8        347.93        370.25        40.72 o
   3  10   8       1071.21        957.14        57.70 o
   4  10   8        156.69        168.35        31.90 o
   5  10   8       1256.42       1193.28        61.05 o
   6  10   8        441.37        401.92        38.79 o
   7  10   8        418.60        402.93        38.60 o
   8  10   8         32.91         51.52        25.76 o
   9  10   8         91.82        154.01        38.35 o
  -8  11   8         44.11         89.83        27.87 o
  -7  11   8        460.14        417.30        38.05 o
  -6  11   8        329.11        335.55        31.04 o
  -5  11   8        271.91        244.38        28.12 o
  -4  11   8         22.09         20.19        19.12 o
  -3  11   8         35.75          4.22        25.64 o
  -2  11   8       1621.22       1645.28        50.08 o
  -1  11   8         45.31         33.73        17.79 o
   0  11   8        456.03        488.30        36.83 o
   1  11   8         42.29        111.24        27.62 o
   2  11   8       1615.28       1496.69        77.37 o
   3  11   8         39.07         39.51        27.56 o
   4  11   8         21.89          2.20        35.29 o
   5  11   8        271.56        166.66        31.44 o
   6  11   8        327.80        346.80        42.42 o
   7  11   8        469.80        431.38        46.15 o
   8  11   8         43.59         48.31        26.67 o
  -7  12   8         41.18         22.95        24.97 o
  -6  12   8         41.97         34.48        36.66 o
  -5  12   8        237.63        187.94        36.36 o
  -4  12   8        729.59        882.98        58.78 o
  -3  12   8        533.31        626.73        37.77 o
  -2  12   8          7.13         -4.88        23.80 o
  -1  12   8        221.25        177.36        24.26 o
   0  12   8       2014.77       2159.04        86.69 o
   1  12   8        215.24        175.41        32.16 o
   2  12   8          6.52          2.76        27.78 o
   3  12   8        525.65        509.69        78.73 o
   4  12   8        734.66        821.17        59.60 o
   5  12   8        239.67        203.63        35.70 o
   6  12   8         43.43         -1.20        26.82 o
  -5  13   8        169.88        134.19        34.51 o
  -4  13   8        263.43        278.36        30.37 o
  -3  13   8        279.71        250.84        28.62 o
  -2  13   8         17.30         18.95        20.42 o
  -1  13   8        653.52        622.57        33.09 o
   0  13   8        314.98        278.11        29.12 o
   1  13   8        659.57        685.51        50.26 o
   2  13   8         16.19         22.87        29.11 o
   3  13   8        280.51        249.29        41.58 o
  -3  14   8          5.76         -2.12        22.89 o
  -2  14   8        224.85        198.71        37.78 o
  -1  14   8        139.51        146.55        22.36 o
   0  14   8        192.07        182.45        31.58 o
   1  14   8        141.45         96.37        44.79 o
   2  14   8        225.99        235.50        52.94 o
   3  14   8          5.30        105.20        56.33 o
   1   0   9        176.20        169.08         9.38 o
   2   0   9       3674.88       2690.19        43.17 o
   3   0   9        132.08        221.78        14.32 o
   4   0   9        986.67        950.33        29.62 o
   5   0   9        175.86        120.56        14.72 o
   6   0   9          7.63         43.09        12.68 o
   7   0   9       1458.02       1397.32        42.38 o
   8   0   9        802.43        819.04        34.85 o
   9   0   9       1689.24       1572.00        50.36 o
  10   0   9        668.08        676.21        26.20 o
  11   0   9        553.00        583.29        36.26 o
  12   0   9        160.17        130.72        24.76 o
 -12   1   9        891.29        759.87        46.18 o
 -11   1   9         72.15         88.79        20.67 o
 -10   1   9        292.02        338.43        19.53 o
  -9   1   9        484.21        486.47        22.53 o
  -8   1   9       1352.27       1339.30        35.05 o
  -7   1   9         38.74         55.88         9.37 o
  -6   1   9        459.60        441.06        24.54 o
  -5   1   9       6101.13       5835.98       114.52 o
  -4   1   9       4463.02       4010.25        81.44 o
  -3   1   9       9503.99       8846.12       143.68 o
  -2   1   9       2171.53       2136.96        35.67 o
  -1   1   9       1783.37       1287.86        25.66 o
   0   1   9       7586.26       7140.30        90.51 o
   1   1   9       1776.74       1273.68        22.65 o
   2   1   9       2181.14       2186.64        43.85 o
   3   1   9       9508.81       9065.02       147.60 o
   4   1   9       4447.61       4029.72        81.81 o
   5   1   9       6078.64       5839.33       114.66 o
   6   1   9        459.23        417.49        23.25 o
   7   1   9         38.69         38.80        15.87 o
   8   1   9       1353.67       1333.68        43.77 o
   9   1   9        495.26        513.56        43.44 o
  10   1   9        285.48        303.38        19.13 o
  11   1   9         72.33        135.91        16.08 o
  12   1   9        893.45        861.45        67.46 o
 -12   2   9         44.89         76.97        25.69 o
 -11   2   9        243.78        206.78        25.67 o
 -10   2   9        275.11        277.26        24.06 o
  -9   2   9        577.71        624.79        26.97 o
  -8   2   9        398.86        408.98        23.51 o
  -7   2   9        603.57        485.40        21.04 o
  -6   2   9        147.59        140.78        16.24 o
  -5   2   9       1190.63       1148.92        34.28 o
  -4   2   9        521.09        575.35        23.02 o
  -3   2   9       1979.87       1899.76        69.71 o
  -2   2   9       3616.62       3634.53        70.73 o
  -1   2   9        648.31        678.69        19.55 o
   0   2   9       2042.20       1990.15        33.93 o
   1   2   9        633.70        665.06        19.47 o
   2   2   9       3630.22       3681.08        72.48 o
   3   2   9       2016.22       1930.84        55.58 o
   4   2   9        514.28        566.17        23.54 o
   5   2   9       1187.45       1160.90        35.23 o
   6   2   9        145.46        161.56        16.82 o
   7   2   9        586.27        456.61        26.22 o
   8   2   9        399.84        387.76        25.95 o
   9   2   9        577.77        588.13        32.64 o
  10   2   9        274.12        249.80        22.99 o
  11   2   9        236.59        166.52        22.10 o
  12   2   9         43.52         10.42        25.98 o
 -12   3   9        170.79        194.03        37.65 o
 -11   3   9        122.39        124.70        20.50 o
 -10   3   9        771.17        718.83        30.39 o
  -9   3   9        938.34        927.51        51.96 o
  -8   3   9        949.22        928.95        32.04 o
  -7   3   9         56.31         69.02        12.85 o
  -6   3   9       1363.90       1336.98        32.87 o
  -5   3   9       2702.25       2429.05        49.08 o
  -4   3   9       2153.73       1984.45        61.76 o
  -3   3   9        728.30        721.60        53.58 o
  -2   3   9       2068.26       2039.38        52.25 o
  -1   3   9       3660.40       3640.03        71.31 o
   0   3   9       1378.36       1563.17        32.43 o
   1   3   9       3703.93       3709.30        65.74 o
   2   3   9       2074.33       2040.67        41.77 o
   3   3   9        720.52        677.34        23.15 o
   4   3   9       2154.32       2172.83        50.88 o
   5   3   9       2713.57       2475.01        57.91 o
   6   3   9       1362.26       1372.73        40.46 o
   7   3   9         55.53         56.23        14.59 o
   8   3   9        954.03        939.33        37.62 o
   9   3   9        933.57        952.99        32.53 o
  10   3   9        779.61        765.57        32.52 o
  11   3   9        119.70        115.76        18.32 o
  12   3   9        169.57        104.36        30.31 o
 -12   4   9         50.67         38.68        46.83 o
 -11   4   9        555.83        563.66        30.28 o
 -10   4   9        543.11        500.67        26.00 o
  -9   4   9        760.71        738.15        32.18 o
  -8   4   9         77.45        115.90        15.32 o
  -7   4   9        204.02        208.60        16.13 o
  -6   4   9        598.22        519.87        22.25 o
  -5   4   9       1364.61       1378.20        39.72 o
  -4   4   9        346.83        347.13        18.52 o
  -3   4   9        488.30        328.79        34.45 o
  -2   4   9       2985.83       3272.51        68.39 o
  -1   4   9       6680.84       6176.08       187.98 o
   0   4   9       3533.19       3158.42        65.91 o
   1   4   9       6725.55       6245.12       106.34 o
   2   4   9       2976.04       3196.21        68.16 o
   3   4   9        503.33        362.78        20.73 o
   4   4   9        352.28        438.03        30.47 o
   5   4   9       1367.68       1450.72        55.54 o
   6   4   9        592.31        506.71        26.06 o
   7   4   9        199.97        214.46        20.77 o
   8   4   9         74.48        103.64        15.95 o
   9   4   9        763.42        844.78        32.97 o
  10   4   9        543.95        551.01        28.32 o
  11   4   9        559.62        514.21        31.89 o
  12   4   9         50.19         39.16        32.45 o
 -11   5   9         41.16         22.47        18.93 o
 -10   5   9        419.77        484.43        40.35 o
  -9   5   9         40.33         50.65        23.47 o
  -8   5   9        613.91        662.72        28.28 o
  -7   5   9        364.06        346.29        21.39 o
  -6   5   9        664.41        615.20        26.30 o
  -5   5   9        248.92        299.46        19.37 o
  -4   5   9        712.82        751.69        26.76 o
  -3   5   9        336.64        375.49        25.43 o
  -2   5   9        641.69        663.08        26.11 o
  -1   5   9        382.16        394.89        20.60 o
   0   5   9         71.45        104.26        14.32 o
   1   5   9        395.88        423.24        20.11 o
   2   5   9        638.17        631.60        26.88 o
   3   5   9        336.94        374.31        22.03 o
   4   5   9        715.48        761.36        33.10 o
   5   5   9        252.35        284.09        20.42 o
   6   5   9        665.88        609.23        28.98 o
   7   5   9        363.51        351.35        30.37 o
   8   5   9        617.21        634.42        29.42 o
   9   5   9         38.71         41.21        15.99 o
  10   5   9        419.79        472.37        27.78 o
  11   5   9         40.78          4.90        20.81 o
 -11   6   9        293.97        286.80        31.37 o
 -10   6   9        197.64        199.67        22.25 o
  -9   6   9       1499.76       1384.87        43.95 o
  -8   6   9        553.76        495.69        26.63 o
  -7   6   9        437.13        477.05        26.25 o
  -6   6   9         95.87        133.23        16.50 o
  -5   6   9        448.33        460.74        35.47 o
  -4   6   9       1100.54        925.58        31.14 o
  -3   6   9       3295.96       2807.86        58.61 o
  -2   6   9        167.80        127.81        15.05 o
  -1   6   9       3056.33       2832.43        63.43 o
   0   6   9        277.58        222.62        18.94 o
   1   6   9       3064.84       2755.26        56.83 o
   2   6   9        167.82        159.31        18.32 o
   3   6   9       3282.19       2841.81        67.10 o
   4   6   9       1091.25        882.88        37.01 o
   5   6   9        451.06        487.01        63.28 o
   6   6   9         98.35         86.27        18.31 o
   7   6   9        431.71        493.99        36.73 o
   8   6   9        554.02        504.73        32.03 o
   9   6   9       1493.40       1409.15        43.65 o
  10   6   9        197.27        177.18        24.30 o
  11   6   9        285.80        316.26        53.62 o
 -11   7   9        236.86        251.85        50.56 o
 -10   7   9        160.51        137.62        33.24 o
  -9   7   9        838.65        740.27        36.04 o
  -8   7   9        459.89        465.36        45.92 o
  -7   7   9        379.59        358.59        39.00 o
  -6   7   9         19.63         15.18        15.06 o
  -5   7   9       2254.40       2165.25        65.04 o
  -4   7   9        603.10        632.45        28.51 o
  -3   7   9        291.43        353.90        21.40 o
  -2   7   9        218.60        239.35        19.30 o
  -1   7   9       4442.38       3858.85        76.00 o
   0   7   9        932.53        818.94        44.12 o
   1   7   9       4446.88       3808.00        74.95 o
   2   7   9        221.52        226.97        24.98 o
   3   7   9        298.22        355.82        24.68 o
   4   7   9        602.24        581.85        33.03 o
   5   7   9       2270.70       2223.68        66.39 o
   6   7   9         20.85         23.89        17.55 o
   7   7   9        379.58        385.86        30.63 o
   8   7   9        456.95        411.14        28.87 o
   9   7   9        850.10        846.81        36.32 o
  10   7   9        156.51        175.81        24.34 o
  11   7   9        237.14        284.37        54.29 o
 -10   8   9        397.24        395.55        34.38 o
  -9   8   9        366.92        359.37        64.87 o
  -8   8   9        147.55        148.77        23.18 o
  -7   8   9        297.07        313.09        25.47 o
  -6   8   9        358.62        366.96        25.80 o
  -5   8   9        273.24        222.28        21.67 o
  -4   8   9        458.39        538.67        28.76 o
  -3   8   9        124.07        108.27        16.56 o
  -2   8   9        272.72        262.67        19.88 o
  -1   8   9        975.50        885.96        30.02 o
   0   8   9         63.49         81.86        17.78 o
   1   8   9        969.23        903.40        38.33 o
   2   8   9        279.68        273.77        42.32 o
   3   8   9        131.00        108.46        20.22 o
   4   8   9        463.07        508.35        38.08 o
   5   8   9        269.99        254.46        37.40 o
   6   8   9        362.94        386.68        30.62 o
   7   8   9        286.83        285.74        28.56 o
   8   8   9        144.69        139.35        24.35 o
   9   8   9        368.60        296.78        34.88 o
  10   8   9        395.88        443.38        76.35 o
  -9   9   9        205.27        228.30        29.61 o
  -8   9   9        328.00        379.58        34.62 o
  -7   9   9       1079.80       1083.38        42.00 o
  -6   9   9        682.69        795.76        37.24 o
  -5   9   9        107.82         64.42        18.38 o
  -4   9   9         60.48        111.61        22.77 o
  -3   9   9        468.02        466.92        27.35 o
  -2   9   9        336.21        340.76        23.79 o
  -1   9   9       2976.13       2844.39        64.24 o
   0   9   9       1449.18       1561.67        59.17 o
   1   9   9       2949.22       2693.80        71.09 o
   2   9   9        331.38        316.62        23.74 o
   3   9   9        459.35        395.78        32.43 o
   4   9   9         58.33         77.60        22.43 o
   5   9   9        113.53        115.55        23.02 o
   6   9   9        675.62        684.86        46.00 o
   7   9   9       1079.72       1069.29        55.65 o
   8   9   9        325.01        374.90        36.98 o
   9   9   9        197.66        209.71        31.69 o
  -9  10   9        147.49        215.60        44.58 o
  -8  10   9        149.14        220.43        31.03 o
  -7  10   9       1046.67       1051.88        53.05 o
  -6  10   9        541.68        494.74        31.72 o
  -5  10   9         13.58         28.05        17.78 o
  -4  10   9        352.25        372.02        27.39 o
  -3  10   9       1684.03       1611.48        48.57 o
  -2  10   9        222.08        241.21        23.08 o
  -1  10   9        319.78        361.85        27.61 o
   0  10   9        321.20        308.75        32.53 o
   1  10   9        311.03        395.87        37.85 o
   2  10   9        215.98        246.96        39.33 o
   3  10   9       1683.31       1507.17       110.96 o
   4  10   9        355.73        305.76        36.69 o
   5  10   9         13.02         22.13        31.56 o
   6  10   9        537.22        519.69        42.89 o
   7  10   9       1046.62       1043.89        57.96 o
   8  10   9        144.56        168.44        30.49 o
   9  10   9        148.79        159.49        47.51 o
  -8  11   9        215.67        227.22        33.40 o
  -7  11   9        385.74        434.64        38.89 o
  -6  11   9        420.61        449.36        34.28 o
  -5  11   9         32.98         -2.51        19.52 o
  -4  11   9        462.60        490.36        41.91 o
  -3  11   9        141.11        140.79        21.14 o
  -2  11   9        174.53        219.96        23.33 o
  -1  11   9        454.28        539.63        31.35 o
   0  11   9        299.73        311.43        31.34 o
   1  11   9        463.05        534.53        42.16 o
   2  11   9        176.07        220.26        36.53 o
   3  11   9        143.52        135.86        33.26 o
   4  11   9        456.63        383.87        42.23 o
   5  11   9         36.17         23.80        26.74 o
   6  11   9        425.22        403.74        41.74 o
   7  11   9        385.40        388.03        53.28 o
  -7  12   9         89.16         36.48        29.51 o
  -6  12   9        716.35        706.64        47.70 o
  -5  12   9        330.96        289.69        30.59 o
  -4  12   9        246.56        281.82        28.71 o
  -3  12   9        145.40        128.40        22.99 o
  -2  12   9        255.96        250.94        26.74 o
  -1  12   9        245.03        223.18        26.03 o
   0  12   9         20.91         57.72        30.76 o
   1  12   9        247.61        233.98        32.17 o
   2  12   9        260.15        275.14        40.29 o
   3  12   9        140.51         78.57        31.69 o
   4  12   9        242.10        222.45        79.74 o
   5  12   9        334.10        309.35        42.42 o
  -5  13   9        714.62        654.31        47.13 o
  -4  13   9         74.77         67.24        29.98 o
  -3  13   9         25.84         31.63        21.39 o
  -2  13   9        766.45        841.75        43.92 o
  -1  13   9         28.60         36.51        16.41 o
   0  13   9        662.32        742.92        52.67 o
   1  13   9         28.45        -28.84        28.84 o
   2  13   9        770.43        847.95        57.65 o
   3  13   9         27.09         50.90        43.44 o
  -3  14   9        184.71        108.91        33.77 o
  -2  14   9         58.51          1.16        21.90 o
  -1  14   9         39.05         11.30        23.41 o
   0  14   9          0.89        -36.65        36.65 o
   1  14   9         37.00         32.58        43.44 o
   2  14   9         59.23         56.33        44.11 o
   0   0  10       3861.72       4261.73        79.13 o
   1   0  10         39.74         98.43         6.48 o
   2   0  10        462.84        325.55        18.14 o
   3   0  10        167.70        177.97        13.71 o
   4   0  10       4840.93       4269.56        86.18 o
   5   0  10       2556.05       2227.43        53.40 o
   6   0  10        565.24        552.27        26.43 o
   7   0  10        559.81        937.40       118.41 o
   8   0  10         80.36        115.78        18.39 o
   9   0  10          3.68         13.66        15.97 o
  10   0  10        537.49        525.22        32.92 o
  11   0  10        430.59        422.45        32.03 o
  12   0  10        116.06        163.10        41.54 o
 -12   1  10        140.31        213.12        39.71 o
 -11   1  10        252.46        300.44        30.60 o
 -10   1  10         15.45         15.93        10.85 o
  -9   1  10        553.53        484.21        59.36 o
  -8   1  10        746.12        728.01        39.18 o
  -7   1  10        808.05        729.49        31.65 o
  -6   1  10        416.46        421.40        24.52 o
  -5   1  10        873.81        925.50        36.73 o
  -4   1  10         90.56        124.62        13.68 o
  -3   1  10       2969.19       2637.43        48.99 o
  -2   1  10       3397.39       3814.46        59.58 o
  -1   1  10       1814.52       1438.20        23.77 o
   0   1  10       1337.42       1286.00        20.41 o
   1   1  10       1797.55       1395.96        23.78 o
   2   1  10       3387.48       3856.46        66.97 o
   3   1  10       2988.96       2612.07        69.92 o
   4   1  10         87.47        137.05        13.76 o
   5   1  10        867.37        913.98        31.93 o
   6   1  10        406.55        405.55        23.51 o
   7   1  10        815.78        731.87        32.20 o
   8   1  10        755.06        758.77        34.43 o
   9   1  10        553.55        454.34        29.84 o
  10   1  10         15.01          6.93        18.71 o
  11   1  10        248.94        274.97        27.89 o
  12   1  10        140.61        127.00        30.25 o
 -12   2  10         25.18         52.06        31.10 o
 -11   2  10        188.86        203.39        24.39 o
 -10   2  10         31.95         57.11        13.87 o
  -9   2  10         41.65         48.55        13.71 o
  -8   2  10        382.06        348.12        24.97 o
  -7   2  10        532.03        472.82        26.70 o
  -6   2  10        199.71        165.30        15.16 o
  -5   2  10        472.35        488.51        37.07 o
  -4   2  10       1091.42        881.59        61.83 o
  -3   2  10       1092.16       1208.86        37.00 o
  -2   2  10       2760.47       2867.57        51.25 o
  -1   2  10        659.89        746.58        18.91 o
   0   2  10        425.76        435.74        17.91 o
   1   2  10        653.27        735.50        22.18 o
   2   2  10       2753.18       2860.06        53.01 o
   3   2  10       1102.77       1252.77        50.77 o
   4   2  10       1077.04        985.87        30.72 o
   5   2  10        479.95        568.72        25.31 o
   6   2  10        200.70        162.59        24.10 o
   7   2  10        533.93        485.07        26.62 o
   8   2  10        377.93        321.55        24.60 o
   9   2  10         41.80         26.25        16.76 o
  10   2  10         34.38         21.84        17.86 o
  11   2  10        189.01        176.98        25.09 o
  12   2  10         25.05         -6.59        25.39 o
 -12   3  10         85.18        102.48        52.26 o
 -11   3  10        209.81        200.75        25.18 o
 -10   3  10        689.87        771.32        34.36 o
  -9   3  10       1090.87       1152.08        50.32 o
  -8   3  10        734.25        729.19        34.92 o
  -7   3  10       2054.77       2047.01        64.55 o
  -6   3  10        805.36        819.90        33.31 o
  -5   3  10       1318.03       1350.74        53.77 o
  -4   3  10         90.87         81.58        10.86 o
  -3   3  10       4716.32       4205.26        83.61 o
  -2   3  10        324.39        360.25        19.59 o
  -1   3  10       7941.58       8263.61       150.60 o
   0   3  10       8738.95       8516.06       138.66 o
   1   3  10       7985.10       8172.06       122.63 o
   2   3  10        338.45        359.21        17.05 o
   3   3  10       4726.37       4381.39        78.66 o
   4   3  10         90.05         93.43        13.08 o
   5   3  10       1318.11       1356.74        39.14 o
   6   3  10        818.37        840.71        32.09 o
   7   3  10       2073.49       2008.25        54.19 o
   8   3  10        719.75        748.75        34.78 o
   9   3  10       1093.50       1216.78        44.62 o
  10   3  10        691.29        692.66        36.77 o
  11   3  10        210.37        175.54        26.55 o
  12   3  10         86.24        125.51        30.86 o
 -11   4  10        227.95        207.36        24.82 o
 -10   4  10         24.89          1.13        12.40 o
  -9   4  10       1579.64       1690.64        44.24 o
  -8   4  10       1112.07       1089.06        33.16 o
  -7   4  10        447.27        426.19        20.84 o
  -6   4  10        911.28        827.41        27.21 o
  -5   4  10       2699.64       2496.00        51.96 o
  -4   4  10        257.73        277.77        16.85 o
  -3   4  10       2778.00       2785.83        61.47 o
  -2   4  10       1366.06       1520.25        54.27 o
  -1   4  10        386.07        310.45        17.00 o
   0   4  10        600.54        438.53        21.22 o
   1   4  10        387.80        312.79        16.61 o
   2   4  10       1374.26       1465.26        39.34 o
   3   4  10       2758.20       2816.90        62.87 o
   4   4  10        256.94        290.86        18.91 o
   5   4  10       2723.86       2582.08        74.25 o
   6   4  10        919.15        925.68        63.17 o
   7   4  10        446.56        402.53        25.71 o
   8   4  10       1105.69       1130.33        41.75 o
   9   4  10       1560.42       1637.50        52.49 o
  10   4  10         24.05         -7.44        17.01 o
  11   4  10        225.27        223.25        31.81 o
  12   4  10        371.39        358.34        61.08 o
 -11   5  10         57.08         55.37        39.45 o
 -10   5  10        248.99        310.29        40.49 o
  -9   5  10         73.69         57.72        14.74 o
  -8   5  10        455.82        432.11        23.60 o
  -7   5  10        289.45        268.11        19.76 o
  -6   5  10       1223.44       1241.97        35.43 o
  -5   5  10        149.50        175.00        16.41 o
  -4   5  10        720.98        681.02        25.85 o
  -3   5  10        402.49        397.22        20.36 o
  -2   5  10       1066.31       1065.06        32.54 o
  -1   5  10        402.24        447.26        21.26 o
   0   5  10        707.11        822.72        29.35 o
   1   5  10        410.82        422.64        20.39 o
   2   5  10       1083.04       1104.84        34.94 o
   3   5  10        390.78        380.78        22.70 o
   4   5  10        726.46        706.30        32.23 o
   5   5  10        150.89        177.68        17.81 o
   6   5  10       1220.41       1246.58        40.48 o
   7   5  10        284.77        284.28        22.98 o
   8   5  10        467.00        472.63        30.01 o
   9   5  10         74.04         49.73        18.34 o
  10   5  10        249.52        221.87        28.70 o
  11   5  10         58.10         49.12        41.65 o
 -11   6  10        120.66        119.38        69.90 o
 -10   6  10         92.65         89.87        18.88 o
  -9   6  10        769.16        880.88        37.06 o
  -8   6  10       1087.99       1099.68        72.37 o
  -7   6  10       1301.93       1312.53        45.06 o
  -6   6  10        174.46        183.32        18.21 o
  -5   6  10       1033.35       1038.11        33.95 o
  -4   6  10        149.88        149.30        16.03 o
  -3   6  10        161.50        150.51        15.31 o
  -2   6  10        992.01       1107.34        44.08 o
  -1   6  10        489.44        428.54        22.45 o
   0   6  10        325.10        369.34        22.43 o
   1   6  10        499.02        492.59        23.43 o
   2   6  10        996.02       1119.99        37.72 o
   3   6  10        166.36        175.67        26.06 o
   4   6  10        147.92        147.80        19.28 o
   5   6  10       1040.66        969.96        40.25 o
   6   6  10        168.15        150.37        19.00 o
   7   6  10       1300.96       1218.81        43.96 o
   8   6  10       1088.56       1076.34        41.99 o
   9   6  10        754.22        788.59        38.48 o
  10   6  10         88.68        126.14        40.29 o
  11   6  10        123.06        168.99        48.86 o
 -10   7  10         99.45        104.11        29.82 o
  -9   7  10         15.93         25.01        16.79 o
  -8   7  10        454.55        429.77        27.20 o
  -7   7  10       1026.43       1093.27        41.39 o
  -6   7  10        474.91        524.58        30.81 o
  -5   7  10        769.15        806.95        32.88 o
  -4   7  10        220.87        211.35        18.74 o
  -3   7  10       1120.49       1006.25        33.17 o
  -2   7  10        624.82        595.74        28.08 o
  -1   7  10       1466.41       1313.41        47.22 o
   0   7  10        273.47        250.70        21.32 o
   1   7  10       1452.61       1321.82        37.44 o
   2   7  10        610.34        585.17        43.83 o
   3   7  10       1126.35       1040.98        38.87 o
   4   7  10        225.57        223.54        22.92 o
   5   7  10        767.46        770.05        38.25 o
   6   7  10        468.25        417.25        30.71 o
   7   7  10       1018.07       1035.81        41.13 o
   8   7  10        460.57        399.40        28.43 o
   9   7  10         15.60        -18.56        18.56 o
  10   7  10         99.68        124.29        86.19 o
 -10   8  10        214.96        243.37        69.56 o
  -9   8  10         23.84         43.96        21.53 o
  -8   8  10        245.36        269.20        35.17 o
  -7   8  10        580.81        677.86        34.15 o
  -6   8  10         64.74         74.02        17.92 o
  -5   8  10        364.35        390.25        25.98 o
  -4   8  10       2091.14       2117.18        53.41 o
  -3   8  10        685.96        743.31        31.07 o
  -2   8  10         10.23         13.19        13.09 o
  -1   8  10        303.25        280.38        18.80 o
   0   8  10       1661.55       1681.66        49.88 o
   1   8  10        310.75        259.98        23.39 o
   2   8  10         10.93         18.45        15.26 o
   3   8  10        690.88        716.35        35.80 o
   4   8  10       2073.19       2095.61        66.60 o
   5   8  10        354.70        356.50        33.96 o
   6   8  10         68.58         58.72        20.72 o
   7   8  10        584.18        575.87        37.35 o
   8   8  10        244.41        207.25        27.04 o
   9   8  10         25.65         27.53        21.60 o
  10   8  10        220.19        329.16        57.01 o
  -9   9  10        282.05        321.02        33.44 o
  -8   9  10        549.73        621.10        65.29 o
  -7   9  10         84.51         92.78        20.56 o
  -6   9  10       1473.10       1362.07        45.90 o
  -5   9  10        514.97        474.35        29.28 o
  -4   9  10       2690.37       2651.36        63.58 o
  -3   9  10          6.73        -10.62        15.99 o
  -2   9  10       1256.88       1402.02        42.72 o
  -1   9  10        284.42        324.45        21.32 o
   0   9  10         73.87         66.40        19.31 o
   1   9  10        289.74        303.78        27.36 o
   2   9  10       1258.04       1313.83        42.20 o
   3   9  10          6.48         11.39        20.51 o
   4   9  10       2688.00       2533.54        77.86 o
   5   9  10        513.96        493.35        65.92 o
   6   9  10       1488.29       1326.29        54.50 o
   7   9  10         89.54         91.32        23.13 o
   8   9  10        545.28        556.66        62.44 o
   9   9  10        280.51        285.72        57.01 o
  -8  10  10        177.46        162.01        40.84 o
  -7  10  10        246.73        320.48        41.24 o
  -6  10  10        582.85        640.61        39.43 o
  -5  10  10       1662.47       1635.16        50.84 o
  -4  10  10          8.03         -7.99        16.21 o
  -3  10  10        319.37        360.45        25.88 o
  -2  10  10         47.01         60.95        16.76 o
  -1  10  10       1293.27       1162.83        40.10 o
   0  10  10       1543.26       1438.22        60.48 o
   1  10  10       1311.92       1324.11        58.77 o
   2  10  10         48.12         79.24        25.73 o
   3  10  10        322.00        343.98        38.64 o
   4  10  10          7.46          6.53        28.17 o
   5  10  10       1649.01       1530.39        69.67 o
   6  10  10        578.35        557.92        44.68 o
   7  10  10        247.56        270.95        33.91 o
   8  10  10        176.27        182.35        65.83 o
  -8  11  10        333.46        514.64        57.75 o
  -7  11  10         56.20         35.30        25.82 o
  -6  11  10        397.08        342.44        31.92 o
  -5  11  10         63.09         96.37        33.11 o
  -4  11  10         61.85         68.78        28.70 o
  -3  11  10         14.05          6.37        16.80 o
  -2  11  10        946.27        924.97        39.12 o
  -1  11  10        119.69         37.63        17.68 o
   0  11  10        132.86         90.99        24.56 o
   1  11  10        115.78        133.97        29.61 o
   2  11  10        935.19        880.31        53.17 o
   3  11  10         12.89         33.70        28.01 o
   4  11  10         63.63        113.96        30.98 o
   5  11  10         61.86         98.37        53.95 o
   6  11  10        390.78        423.23       104.52 o
   7  11  10         59.37         80.08        50.90 o
  -6  12  10         77.68        100.51        28.24 o
  -5  12  10         81.94         78.14        24.98 o
  -4  12  10        235.01        257.17        28.06 o
  -3  12  10        314.61        286.44        28.09 o
  -2  12  10         31.99         47.27        20.24 o
  -1  12  10        888.59        729.13        38.96 o
   0  12  10        781.14        821.45        53.50 o
   1  12  10        890.16        773.65        58.12 o
   2  12  10         30.65         -0.48        29.51 o
   3  12  10        309.94        282.87        42.05 o
   4  12  10        239.26        259.29        40.31 o
   5  12  10         82.61         57.01        48.86 o
  -5  13  10         38.48        153.15        47.05 o
  -4  13  10         22.69          2.73        21.07 o
  -3  13  10        503.57        516.73        35.88 o
  -2  13  10         10.76         51.53        20.39 o
  -1  13  10        181.69        171.89        19.63 o
   0  13  10        219.16        197.88        33.80 o
   1  13  10        185.15        110.24        32.98 o
   2  13  10          9.48         18.28        38.97 o
   3  13  10        494.26        547.01        68.55 o
  -2  14  10         34.24         47.80        23.85 o
  -1  14  10         13.76         17.66        32.63 o
   0  14  10        602.45        832.74        76.69 o
   1  14  10         13.84         20.36        42.76 o
   2  14  10         34.97         57.69        56.33 o
   1   0  11      19590.39      20104.68       265.71 o
   2   0  11       7469.98       8223.85       121.54 o
   3   0  11         15.11        141.48        10.01 o
   4   0  11        822.61       1042.58        34.87 o
   5   0  11        109.38        174.54        18.69 o
   6   0  11        154.11        207.85        18.78 o
   7   0  11       3111.99       3115.62        73.20 o
   8   0  11       1907.80       1884.16        53.88 o
   9   0  11         62.29         53.45        18.54 o
  10   0  11          9.37         41.80        24.00 o
  11   0  11          0.01         -2.30        18.71 o
  12   0  11        177.84        134.49        31.73 o
 -12   1  11          5.27          4.09        71.26 o
 -11   1  11        528.53        544.95        39.81 o
 -10   1  11        248.33        227.59        24.69 o
  -9   1  11        230.71        240.14        24.47 o
  -8   1  11          7.89         21.36        15.29 o
  -7   1  11       1107.07       1086.93        38.47 o
  -6   1  11       1105.66       1127.10        37.14 o
  -5   1  11        142.22        143.26        15.17 o
  -4   1  11        209.77        168.28        14.88 o
  -3   1  11        378.44        347.79        19.13 o
  -2   1  11       8051.00       8508.58       125.65 o
  -1   1  11       6909.12       6931.11        94.95 o
   0   1  11      19732.26      19584.13       242.16 o
   1   1  11       6949.57       6855.91        94.61 o
   2   1  11       8079.18       8498.68       138.44 o
   3   1  11        372.25        362.20        20.70 o
   4   1  11        201.66        149.11        12.72 o
   5   1  11        148.68        173.41        16.00 o
   6   1  11       1117.42       1074.59        35.92 o
   7   1  11       1103.16       1112.31        39.03 o
   8   1  11          7.01         24.29        15.40 o
   9   1  11        224.08        193.21        22.98 o
  10   1  11        240.51        212.75        24.69 o
  11   1  11        529.21        535.26        55.54 o
  12   1  11          5.40        -24.41        24.41 o
 -12   2  11       1145.72       1341.95       150.67 o
 -11   2  11         37.74         14.88        21.00 o
 -10   2  11        353.12        400.94        22.36 o
  -9   2  11         87.02         77.86        13.07 o
  -8   2  11        167.93        171.35        14.13 o
  -7   2  11        165.34        170.24        30.37 o
  -6   2  11       1722.56       1682.22        47.13 o
  -5   2  11        523.42        477.22        19.83 o
  -4   2  11        712.01        783.73        35.17 o
  -3   2  11        222.77        272.00        15.68 o
  -2   2  11       4328.47       4220.85        72.28 o
  -1   2  11       4874.36       5391.71        89.68 o
   0   2  11        258.00        244.62        14.21 o
   1   2  11       4868.31       5244.56        80.80 o
   2   2  11       4303.24       4280.69        75.05 o
   3   2  11        228.44        285.76        15.30 o
   4   2  11        699.24        780.20        24.69 o
   5   2  11        523.67        528.61        41.32 o
   6   2  11       1746.75       1798.30        48.55 o
   7   2  11        170.96        187.65        19.61 o
   8   2  11        161.32        174.28        20.55 o
   9   2  11         87.33         58.54        18.28 o
  10   2  11        350.63        363.54        30.37 o
  11   2  11         36.08         79.21        48.19 o
  12   2  11       1149.32       1194.50        61.64 o
 -12   3  11        484.49        331.87        70.58 o
 -11   3  11        142.40        107.23        51.58 o
 -10   3  11        423.63        495.20        37.35 o
  -9   3  11        672.92        673.47        27.97 o
  -8   3  11         29.09         54.21        17.53 o
  -7   3  11         11.08         33.87        14.28 o
  -6   3  11        496.19        442.47        24.53 o
  -5   3  11       2458.77       2310.97        55.04 o
  -4   3  11        378.92        359.07        19.74 o
  -3   3  11        376.16        409.19        20.43 o
  -2   3  11        634.39        774.62        24.69 o
  -1   3  11        335.37        335.27        24.31 o
   0   3  11        218.57        315.59        16.92 o
   1   3  11        335.80        308.12        37.39 o
   2   3  11        628.78        766.90        23.65 o
   3   3  11        381.86        405.81        18.77 o
   4   3  11        382.91        369.77        18.99 o
   5   3  11       2447.26       2315.15        55.89 o
   6   3  11        484.81        450.33        26.00 o
   7   3  11         11.16         39.23        14.99 o
   8   3  11         30.43         58.75        16.77 o
   9   3  11        673.53        674.41        35.04 o
  10   3  11        434.05        452.55        37.85 o
  11   3  11        141.79        164.53        51.92 o
  12   3  11        484.85        494.09        83.50 o
 -11   4  11        109.75        137.43        43.72 o
 -10   4  11         72.29         78.80        18.27 o
  -9   4  11        608.27        597.78        35.02 o
  -8   4  11       3001.50       3033.85        75.43 o
  -7   4  11         39.81         54.74        11.13 o
  -6   4  11        631.37        623.32        29.08 o
  -5   4  11        183.81        156.04        14.39 o
  -4   4  11         34.59         51.87        11.73 o
  -3   4  11        207.66        172.46        15.23 o
  -2   4  11       2337.96       2464.83        54.71 o
  -1   4  11       1982.97       2117.62        49.96 o
   0   4  11       2030.14       2101.45        53.21 o
   1   4  11       1986.37       2011.35        42.51 o
   2   4  11       2295.71       2336.05        54.12 o
   3   4  11        202.94        170.52        14.69 o
   4   4  11         34.92         61.12        12.00 o
   5   4  11        182.80        191.76        17.71 o
   6   4  11        617.66        611.61        29.10 o
   7   4  11         36.71         34.54        14.49 o
   8   4  11       3005.11       3050.46        75.17 o
   9   4  11        608.71        609.73        34.20 o
  10   4  11         71.21         60.10        19.90 o
  11   4  11        107.99        100.72        35.04 o
 -11   5  11         86.32        136.50        55.31 o
 -10   5  11       1500.69       1476.49        55.16 o
  -9   5  11        465.49        404.35        23.02 o
  -8   5  11        951.30        896.35        36.12 o
  -7   5  11        220.70        229.78        19.75 o
  -6   5  11        737.24        699.27        27.32 o
  -5   5  11        231.63        275.27        19.19 o
  -4   5  11       5808.73       5713.89       102.57 o
  -3   5  11        246.95        274.54        31.44 o
  -2   5  11        685.78        696.83        26.36 o
  -1   5  11        979.66       1069.06        31.44 o
   0   5  11       2014.36       1720.70        44.01 o
   1   5  11        974.42       1065.46        30.41 o
   2   5  11        685.97        684.39        28.07 o
   3   5  11        243.98        270.61        19.99 o
   4   5  11       5811.18       5700.87       125.97 o
   5   5  11        228.83        268.83        20.35 o
   6   5  11        742.35        784.27        41.24 o
   7   5  11        218.88        201.60        24.29 o
   8   5  11        961.06        952.62        40.85 o
   9   5  11        473.98        432.05        40.34 o
  10   5  11       1505.17       1420.87       114.95 o
  11   5  11         85.97        143.88        47.51 o
 -11   6  11         52.36        110.62        48.86 o
 -10   6  11        894.40        938.57        49.44 o
  -9   6  11        273.84        251.37        22.69 o
  -8   6  11         49.58         41.12        14.79 o
  -7   6  11        146.17        193.08        20.70 o
  -6   6  11         81.85         99.77        17.10 o
  -5   6  11        453.65        514.72        31.19 o
  -4   6  11       1238.74       1284.46        61.60 o
  -3   6  11        780.87        691.67        27.07 o
  -2   6  11        518.56        502.23        24.94 o
  -1   6  11        157.10        133.48        14.42 o
   0   6  11       1158.31       1246.42        38.50 o
   1   6  11        161.90        145.51        15.64 o
   2   6  11        527.94        555.52        28.62 o
   3   6  11        781.57        671.15        30.90 o
   4   6  11       1226.05       1329.27        46.88 o
   5   6  11        455.49        472.11        31.19 o
   6   6  11         85.44        115.32        17.82 o
   7   6  11        144.17        236.94        22.60 o
   8   6  11         51.29         22.59        17.47 o
   9   6  11        272.50        246.22        25.32 o
  10   6  11        891.26        916.28        57.44 o
  11   6  11         50.03         82.12        40.72 o
 -10   7  11         41.56         34.76        42.42 o
  -9   7  11        314.91        312.02        28.64 o
  -8   7  11         14.90         22.79        15.69 o
  -7   7  11        359.11        325.67        28.72 o
  -6   7  11        262.81        272.10        24.10 o
  -5   7  11        625.60        560.65        28.49 o
  -4   7  11         10.82         10.09        13.44 o
  -3   7  11         48.58         42.28        13.45 o
  -2   7  11         88.87        104.78        15.97 o
  -1   7  11       1794.74       1580.00        43.78 o
   0   7  11       1581.83       1521.31        45.65 o
   1   7  11       1781.17       1556.12        41.32 o
   2   7  11         90.51        114.52        15.69 o
   3   7  11         49.21         29.51        15.92 o
   4   7  11          8.65        -14.90        14.90 o
   5   7  11        633.42        564.48        35.47 o
   6   7  11        258.99        216.75        32.73 o
   7   7  11        357.04        357.30        31.34 o
   8   7  11         13.95         16.53        16.99 o
   9   7  11        310.28        304.38        81.34 o
  10   7  11         40.47        113.34        44.11 o
 -10   8  11        221.81        206.42        52.94 o
  -9   8  11        434.46        462.45        35.49 o
  -8   8  11         49.24          7.55        23.34 o
  -7   8  11        153.22        217.54        22.50 o
  -6   8  11       1223.04       1235.64        41.98 o
  -5   8  11       1729.91       1760.69        48.95 o
  -4   8  11        768.29        779.24        34.15 o
  -3   8  11        493.75        556.70        28.66 o
  -2   8  11        303.03        332.83        23.56 o
  -1   8  11        133.42        130.63        14.88 o
   0   8  11       1539.28       1447.84        46.46 o
   1   8  11        129.70        147.08        20.27 o
   2   8  11        303.66        295.58        21.68 o
   3   8  11        500.97        483.84        30.97 o
   4   8  11        770.62        722.28        39.83 o
   5   8  11       1725.28       1748.88        60.83 o
   6   8  11       1224.91       1239.83        60.33 o
   7   8  11        152.32        158.58        25.22 o
   8   8  11         45.48         54.43        28.28 o
   9   8  11        434.86        410.06        41.74 o
  10   8  11        222.21        210.39        52.94 o
  -9   9  11         29.91         32.92        23.09 o
  -8   9  11        400.22        463.12        37.49 o
  -7   9  11         56.11         59.92        20.91 o
  -6   9  11       1185.24       1168.17        51.29 o
  -5   9  11         84.39         82.02        22.66 o
  -4   9  11         86.05        101.14        18.61 o
  -3   9  11         56.37         67.83        15.99 o
  -2   9  11       1280.97       1249.60        40.02 o
  -1   9  11        478.64        448.41        24.43 o
   0   9  11         95.64        122.35        20.87 o
   1   9  11        469.44        472.14        32.00 o
   2   9  11       1272.35       1192.04        40.96 o
   3   9  11         54.94         38.75        19.89 o
   4   9  11         91.81         61.95        21.68 o
   5   9  11         85.13         47.72        21.16 o
   6   9  11       1194.68       1199.04        52.75 o
   7   9  11         55.72         22.18        20.54 o
   8   9  11        403.73        448.11        36.82 o
   9   9  11         30.85         51.58        40.04 o
  -8  10  11        186.39        176.88        29.52 o
  -7  10  11        312.06        277.43        33.14 o
  -6  10  11        429.65        447.98        40.26 o
  -5  10  11        943.45        969.42        59.43 o
  -4  10  11        459.04        482.43        30.76 o
  -3  10  11        467.46        442.79        28.11 o
  -2  10  11        591.35        602.77        31.71 o
  -1  10  11        607.19        505.71        34.47 o
   0  10  11        115.63         74.63        25.21 o
   1  10  11        602.71        583.99        36.76 o
   2  10  11        598.48        595.23        37.89 o
   3  10  11        469.36        423.13        35.60 o
   4  10  11        463.80        476.49        37.48 o
   5  10  11        937.81        906.64        48.93 o
   6  10  11        424.08        416.77        35.66 o
   7  10  11        313.64        275.79        72.62 o
   8  10  11        186.27        193.42        56.33 o
  -7  11  11        672.13        747.81        50.20 o
  -6  11  11        538.75        601.82        39.76 o
  -5  11  11        150.46        130.99        40.95 o
  -4  11  11        319.67        335.96        29.60 o
  -3  11  11        511.76        512.20        33.17 o
  -2  11  11       1206.70       1245.48        43.49 o
  -1  11  11         87.59         74.58        24.17 o
   0  11  11        245.69        265.60        39.57 o
   1  11  11         89.13         61.03        34.86 o
   2  11  11       1206.24       1277.61        61.90 o
   3  11  11        509.29        524.56        37.62 o
   4  11  11        317.57        349.53        40.25 o
   5  11  11        149.66        127.88        32.25 o
   6  11  11        530.94        547.01        76.01 o
  -6  12  11        229.27        245.64        34.22 o
  -5  12  11        424.88        469.16        36.40 o
  -4  12  11        218.08        209.91        26.45 o
  -3  12  11        113.83         96.53        22.14 o
  -2  12  11        106.82         71.37        25.63 o
  -1  12  11        324.04        337.11        36.03 o
   0  12  11        363.39        273.34        35.79 o
   1  12  11        328.22        369.98        45.22 o
   2  12  11        110.90         72.11        32.26 o
   3  12  11        110.85        133.66        34.51 o
   4  12  11        222.69        226.68        57.01 o
  -4  13  11        346.08        416.46        34.19 o
  -3  13  11         56.28         32.38        20.63 o
  -2  13  11        316.09        335.34        29.67 o
  -1  13  11        529.66        499.89        56.06 o
   0  13  11       1373.50       1382.73        66.43 o
   1  13  11        531.32        533.11        51.08 o
   2  13  11        315.89        328.48        59.72 o
   3  13  11         56.01        100.44        58.37 o
  -1  14  11         46.27         43.44        38.01 o
   0  14  11        115.42         73.30        43.44 o
   1  14  11         44.70         -5.43        42.76 o
   0   0  12       5421.51       5825.68       107.29 o
   1   0  12        573.52        637.61        15.30 o
   2   0  12       1609.91       1784.75        44.87 o
   3   0  12        267.85        224.25        10.71 o
   4   0  12        615.38        915.22        61.71 o
   5   0  12         20.29         27.88        11.39 o
   6   0  12        161.62        170.61        18.30 o
   7   0  12        305.78        331.60        23.66 o
   8   0  12        952.95       1082.60        41.05 o
   9   0  12        329.05        318.84        26.60 o
  10   0  12       1635.64       2078.14        62.89 o
  11   0  12         53.72        135.43        43.10 o
  12   0  12        187.17        275.27        35.58 o
 -12   1  12         67.32         48.96        33.91 o
 -11   1  12        269.69        266.70        32.74 o
 -10   1  12         28.52         20.33        20.67 o
  -9   1  12          0.64          2.80        16.51 o
  -8   1  12       2574.97       2694.52        68.67 o
  -7   1  12        442.02        376.82        25.65 o
  -6   1  12       3456.20       3664.22        95.61 o
  -5   1  12       4767.68       4637.54        95.43 o
  -4   1  12       2298.09       2197.60        43.93 o
  -3   1  12       1302.31       1150.26        27.47 o
  -2   1  12      17082.97      16611.86       239.45 o
  -1   1  12       1409.87       1581.80        28.45 o
   0   1  12       1690.54       1963.04        31.42 o
   1   1  12       1399.48       1580.94        27.35 o
   2   1  12      17151.40      16570.33       275.04 o
   3   1  12       1304.57       1174.03        28.64 o
   4   1  12       2284.44       2193.32        45.10 o
   5   1  12       4760.63       4801.40       101.68 o
   6   1  12       3434.77       3617.93        80.08 o
   7   1  12        447.74        412.61        26.71 o
   8   1  12       2596.62       2598.29        67.16 o
   9   1  12          0.66        -14.48        15.42 o
  10   1  12         27.85          8.70        17.06 o
  11   1  12        265.93        359.71        46.86 o
  12   1  12         70.02         83.12        29.36 o
 -12   2  12        125.00        195.46        59.72 o
 -11   2  12        224.88        126.66        33.63 o
 -10   2  12        504.86        461.66        48.86 o
  -9   2  12        760.17        787.54        44.29 o
  -8   2  12       1845.93       1980.59        66.76 o
  -7   2  12        250.48        234.08        17.04 o
  -6   2  12        497.33        467.17        27.26 o
  -5   2  12       1570.12       1635.31        50.25 o
  -4   2  12       1703.32       1769.80        38.70 o
  -3   2  12       3705.65       3727.05        60.52 o
  -2   2  12        219.90        227.09        25.10 o
  -1   2  12        522.61        475.33        16.45 o
   0   2  12       1209.06       1126.92        23.84 o
   1   2  12        517.02        458.36        16.32 o
   2   2  12        222.92        285.41        41.05 o
   3   2  12       3717.72       3726.14        68.05 o
   4   2  12       1723.82       1836.71        40.83 o
   5   2  12       1574.52       1648.93        44.51 o
   6   2  12        502.37        519.44        27.64 o
   7   2  12        252.39        246.71        21.82 o
   8   2  12       1860.29       2024.42        57.01 o
   9   2  12        768.46        760.54        37.48 o
  10   2  12        492.61        491.56        32.91 o
  11   2  12        226.07        222.62        39.13 o
  12   2  12        124.76        165.36        32.23 o
 -11   3  12        175.49        146.59        53.62 o
 -10   3  12        342.58        324.25        22.65 o
  -9   3  12        202.05        221.64        22.72 o
  -8   3  12         78.59        123.23        27.04 o
  -7   3  12       1190.97       1147.36        38.83 o
  -6   3  12        396.12        471.80        25.33 o
  -5   3  12        305.18        266.40        18.83 o
  -4   3  12        566.54        574.98        23.77 o
  -3   3  12        165.84        132.87        15.83 o
  -2   3  12       2693.58       3071.41        63.52 o
  -1   3  12       9839.01      10219.55       165.05 o
   0   3  12          0.12          1.22         7.42 o
   1   3  12       9869.68      10088.38       150.06 o
   2   3  12       2647.98       2940.78        56.44 o
   3   3  12        164.51        164.96        13.45 o
   4   3  12        559.26        573.41        22.57 o
   5   3  12        308.09        243.36        19.02 o
   6   3  12        399.06        443.77        25.68 o
   7   3  12       1182.96       1255.95        42.19 o
   8   3  12         77.51         78.15        18.15 o
   9   3  12        202.30        230.34        23.82 o
  10   3  12        345.65        348.58        28.88 o
  11   3  12        173.45        187.90        39.71 o
 -11   4  12          9.20         69.90        46.83 o
 -10   4  12        150.63        109.06        18.69 o
  -9   4  12        442.76        346.63        28.62 o
  -8   4  12        206.28        206.14        23.06 o
  -7   4  12        865.74        812.08        35.46 o
  -6   4  12        412.11        355.44        25.67 o
  -5   4  12        705.94        655.02        24.58 o
  -4   4  12        521.43        533.18        22.32 o
  -3   4  12       5466.06       5641.95       110.44 o
  -2   4  12        475.29        451.00        21.00 o
  -1   4  12       1280.52       1391.98        35.22 o
   0   4  12        316.26        415.81        21.55 o
   1   4  12       1288.88       1340.82        36.54 o
   2   4  12        480.35        454.51        21.83 o
   3   4  12       5470.04       5746.26       110.41 o
   4   4  12        509.28        539.88        23.57 o
   5   4  12        714.78        653.56        28.89 o
   6   4  12        404.05        359.70        23.81 o
   7   4  12        867.66        862.86        41.71 o
   8   4  12        201.36        192.01        22.42 o
   9   4  12        437.19        342.69        27.96 o
  10   4  12        156.48        132.68        37.67 o
  11   4  12          9.12         22.25        31.56 o
 -11   5  12          6.90         26.47        42.08 o
 -10   5  12        165.07        227.82        39.32 o
  -9   5  12         23.11         32.92        13.10 o
  -8   5  12       1133.95       1115.22        34.76 o
  -7   5  12          0.46         -2.86        11.82 o
  -6   5  12        644.72        730.30        27.84 o
  -5   5  12        151.68        137.58        15.17 o
  -4   5  12       2062.85       1967.75        45.43 o
  -3   5  12        746.21        791.96        29.49 o
  -2   5  12       1648.68       1456.53        39.21 o
  -1   5  12        655.47        702.44        25.00 o
   0   5  12         84.73         83.05        13.91 o
   1   5  12        661.53        696.41        25.35 o
   2   5  12       1666.14       1417.26        43.82 o
   3   5  12        752.59        739.67        30.47 o
   4   5  12       2062.56       2013.88        47.38 o
   5   5  12        150.41        147.68        18.22 o
   6   5  12        650.02        693.27        31.58 o
   7   5  12          0.31         -3.83        16.16 o
   8   5  12       1130.33       1208.95        77.65 o
   9   5  12         22.55         27.94        17.68 o
  10   5  12        166.35        184.56        36.13 o
  11   5  12          6.79         50.22        41.40 o
 -10   6  12        529.91        441.00        87.55 o
  -9   6  12        747.92        778.49        33.99 o
  -8   6  12        328.54        325.62        22.63 o
  -7   6  12        258.65        252.46        20.56 o
  -6   6  12       1264.24       1282.38        38.38 o
  -5   6  12        136.79        154.95        17.23 o
  -4   6  12        757.39        689.66        27.85 o
  -3   6  12         33.63         58.45        13.61 o
  -2   6  12          2.32          3.76        11.24 o
  -1   6  12        814.03        756.61        27.61 o
   0   6  12       2598.21       2498.68        59.63 o
   1   6  12        805.25        748.41        28.13 o
   2   6  12          2.29         -1.54        14.13 o
   3   6  12         34.45         72.61        17.04 o
   4   6  12        760.23        743.78        32.57 o
   5   6  12        140.59        169.59        22.24 o
   6   6  12       1246.43       1214.99        44.08 o
   7   6  12        257.77        253.94        24.10 o
   8   6  12        331.60        330.99        26.78 o
   9   6  12        749.13        751.10        44.13 o
  10   6  12        520.44        412.31        54.21 o
  11   6  12        111.17        191.39        55.65 o
 -10   7  12        107.49        123.74        44.45 o
  -9   7  12        108.85        105.74        21.84 o
  -8   7  12        494.09        518.20        29.27 o
  -7   7  12       1983.48       1797.73        48.83 o
  -6   7  12          9.26         33.00        15.08 o
  -5   7  12        238.63        249.65        20.95 o
  -4   7  12       1497.81       1522.45        42.41 o
  -3   7  12        319.63        385.65        22.93 o
  -2   7  12       1104.48       1140.79        36.82 o
  -1   7  12       1181.41       1300.62        40.39 o
   0   7  12        436.76        551.74        31.93 o
   1   7  12       1172.15       1221.96        36.24 o
   2   7  12       1085.45       1088.49        41.41 o
   3   7  12        323.71        377.51        26.01 o
   4   7  12       1498.54       1483.49        52.69 o
   5   7  12        241.74        232.19        25.08 o
   6   7  12         10.56         27.85        16.74 o
   7   7  12       1971.92       1873.58        56.22 o
   8   7  12        506.12        474.30        35.62 o
   9   7  12        109.11        118.36        25.59 o
  10   7  12        107.47        152.70        46.15 o
 -10   8  12        855.38       1336.32       116.05 o
  -9   8  12         86.82         92.46        22.55 o
  -8   8  12        295.73        294.40        30.22 o
  -7   8  12         19.44          8.79        15.82 o
  -6   8  12        253.81        311.27        25.07 o
  -5   8  12        102.52        121.18        18.78 o
  -4   8  12       1012.97       1014.31        36.71 o
  -3   8  12        316.08        328.86        22.98 o
  -2   8  12        180.66        223.05        20.32 o
  -1   8  12         60.45         79.02        28.31 o
   0   8  12        273.36        261.49        25.37 o
   1   8  12         58.89         59.57        24.59 o
   2   8  12        180.06        206.72        20.52 o
   3   8  12        318.71        354.27        28.07 o
   4   8  12       1036.16       1004.92        45.85 o
   5   8  12        104.56        117.91        22.71 o
   6   8  12        246.99        305.08        33.84 o
   7   8  12         18.69         40.45        20.77 o
   8   8  12        290.93        258.49        36.13 o
   9   8  12         88.02         50.90        38.01 o
  -9   9  12         13.54        -31.51        36.99 o
  -8   9  12        271.66        276.34        31.81 o
  -7   9  12        908.49        765.70        41.17 o
  -6   9  12        554.39        676.31        34.90 o
  -5   9  12        153.15        159.03        23.10 o
  -4   9  12       1257.03       1136.88        45.75 o
  -3   9  12        709.67        695.89        32.86 o
  -2   9  12       2594.39       2623.80        61.67 o
  -1   9  12         40.33         10.35        17.09 o
   0   9  12         70.10         80.61        20.14 o
   1   9  12         39.04          7.42        18.73 o
   2   9  12       2594.90       2474.15        60.46 o
   3   9  12        707.60        664.59        38.66 o
   4   9  12       1263.16       1193.72        52.56 o
   5   9  12        154.74        147.87        25.54 o
   6   9  12        560.76        716.24        43.61 o
   7   9  12        916.84        830.72        46.23 o
   8   9  12        269.35        361.06        60.40 o
  -8  10  12        160.51        152.05        28.51 o
  -7  10  12         17.22        -16.09        31.63 o
  -6  10  12        169.11        113.26        23.19 o
  -5  10  12        411.99        376.62        30.63 o
  -4  10  12        490.81        498.69        44.98 o
  -3  10  12         39.58         50.63        17.42 o
  -2  10  12         52.69         65.82        24.77 o
  -1  10  12        548.01        487.87        32.00 o
   0  10  12        279.91        281.04        27.46 o
   1  10  12        552.59        534.80        35.78 o
   2  10  12         53.04         67.58        23.22 o
   3  10  12         41.09         22.60        31.38 o
   4  10  12        498.98        469.12        37.43 o
   5  10  12        406.72        440.67        36.82 o
   6  10  12        166.73         93.20        25.69 o
   7  10  12         17.79         38.78        32.99 o
  -7  11  12         48.84         41.47        25.98 o
  -6  11  12         70.30         75.90        27.07 o
  -5  11  12        215.19        268.03        28.57 o
  -4  11  12         80.94        129.16        23.65 o
  -3  11  12        419.36        420.22        30.75 o
  -2  11  12       1471.30       1571.17        49.17 o
  -1  11  12         16.32         29.04        28.21 o
   0  11  12          0.31        -19.57        22.98 o
   1  11  12         17.12         16.81        37.07 o
   2  11  12       1483.48       1616.73        91.69 o
   3  11  12        420.69        412.13        35.56 o
   4  11  12         77.02         82.99        30.43 o
   5  11  12        218.11        261.29        57.01 o
   6  11  12         66.31         10.18        47.51 o
  -6  12  12         29.40         28.70        34.60 o
  -5  12  12        192.34        186.11        32.62 o
  -4  12  12         66.81         77.03        22.25 o
  -3  12  12        475.37        451.58        32.60 o
  -2  12  12         50.34         25.17        19.04 o
  -1  12  12         53.79        105.46        28.13 o
   0  12  12         91.85        100.33        29.47 o
   1  12  12         52.58        128.26        35.38 o
   2  12  12         49.35         65.53        33.10 o
   3  12  12        472.29        508.02        51.59 o
  -4  13  12          4.23          4.97        21.08 o
  -3  13  12         31.78         47.54        20.97 o
  -2  13  12        144.36        112.31        22.78 o
  -1  13  12        352.95        342.38        53.67 o
   0  13  12         56.99        160.35        40.68 o
   1  13  12        353.96        352.86        49.12 o
   2  13  12        145.94         84.83        45.47 o
   1   0  13      12894.82      14207.72       190.32 o
   2   0  13       2458.47       2805.55        71.68 o
   3   0  13       1093.35       1140.76        34.82 o
   4   0  13        381.59        410.27        21.84 o
   5   0  13          8.54          4.89        11.31 o
   6   0  13         92.54        122.04        16.70 o
   7   0  13        269.28        273.70        22.52 o
   8   0  13        211.24        206.47        22.63 o
   9   0  13          0.13         29.99        17.54 o
  10   0  13       1282.71       1477.73        60.44 o
  11   0  13         39.79         60.16        31.98 o
  12   0  13        293.87        373.95        82.12 o
 -11   1  13         81.74        103.15        37.28 o
 -10   1  13        553.52        646.96        43.02 o
  -9   1  13        122.72        127.58        20.76 o
  -8   1  13        872.18        850.55        37.62 o
  -7   1  13        439.72        496.03        30.74 o
  -6   1  13       2239.84       2327.95        58.66 o
  -5   1  13        163.40        222.29        18.57 o
  -4   1  13        388.42        372.11        21.63 o
  -3   1  13       2730.56       2609.06        44.38 o
  -2   1  13       2460.85       2474.71        38.70 o
  -1   1  13       3877.79       4256.71        61.37 o
   0   1  13        104.93        106.81         9.65 o
   1   1  13       3887.52       4292.40        62.50 o
   2   1  13       2475.59       2495.45        43.81 o
   3   1  13       2719.38       2601.20        50.48 o
   4   1  13        392.22        446.16        22.51 o
   5   1  13        162.72        252.26        19.09 o
   6   1  13       2246.34       2286.67        58.58 o
   7   1  13        435.50        419.41        29.19 o
   8   1  13        883.86        803.66        45.45 o
   9   1  13        121.68        149.58        21.94 o
  10   1  13        543.16        553.24        47.22 o
  11   1  13         81.44        167.67        35.38 o
 -11   2  13        333.40        209.71        60.40 o
 -10   2  13         41.55          4.50        25.71 o
  -9   2  13        222.08        228.06        30.72 o
  -8   2  13       1033.13       1068.12        48.80 o
  -7   2  13         47.89         79.21        16.94 o
  -6   2  13       2588.67       2738.38        91.49 o
  -5   2  13        126.31        119.94        12.04 o
  -4   2  13        987.29        957.65        26.48 o
  -3   2  13        359.99        384.90        16.24 o
  -2   2  13      11483.24      11190.42       164.41 o
  -1   2  13       1164.10       1219.45        24.20 o
   0   2  13        116.07        120.36         9.50 o
   1   2  13       1159.99       1228.29        26.48 o
   2   2  13      11519.39      11288.31       172.32 o
   3   2  13        357.90        372.38        26.76 o
   4   2  13        973.70        968.92        28.18 o
   5   2  13        128.01         92.57        14.70 o
   6   2  13       2589.81       2770.27        66.13 o
   7   2  13         47.53         64.49        16.85 o
   8   2  13       1015.24       1064.44        41.44 o
   9   2  13        221.72        182.75        22.65 o
  10   2  13         41.14        -10.12        19.66 o
  11   2  13        334.34        347.34        75.67 o
 -11   3  13        156.14        181.89        54.97 o
 -10   3  13        806.91        801.32        37.48 o
  -9   3  13        353.20        312.64        26.56 o
  -8   3  13        769.43        756.64        58.78 o
  -7   3  13       1446.94       1496.10        44.51 o
  -6   3  13        557.34        537.13        26.34 o
  -5   3  13        842.13        883.92        30.79 o
  -4   3  13        471.48        434.21        17.96 o
  -3   3  13        435.63        428.93        17.64 o
  -2   3  13       1379.67       1562.15        42.91 o
  -1   3  13        782.84        855.34        23.26 o
   0   3  13        207.67        206.70        14.93 o
   1   3  13        780.76        825.70        22.06 o
   2   3  13       1382.24       1458.81        31.07 o
   3   3  13        438.18        448.47        20.31 o
   4   3  13        466.21        454.11        24.44 o
   5   3  13        840.19        894.98        32.22 o
   6   3  13        564.88        560.71        42.12 o
   7   3  13       1451.65       1611.38        48.79 o
   8   3  13        760.65        888.69        38.31 o
   9   3  13        351.00        267.07        24.98 o
  10   3  13        821.92        907.96        70.24 o
  11   3  13        156.28        144.28        38.79 o
 -11   4  13        143.80         53.62        46.83 o
 -10   4  13         69.20         51.96        18.12 o
  -9   4  13        515.43        510.51        37.52 o
  -8   4  13       1222.80       1188.77        43.89 o
  -7   4  13          7.90          5.35        18.71 o
  -6   4  13        234.39        226.74        20.67 o
  -5   4  13        484.95        537.99        22.47 o
  -4   4  13        301.76        345.55        21.01 o
  -3   4  13        687.96        777.02        38.52 o
  -2   4  13        752.59        630.66        24.18 o
  -1   4  13       1352.20       1306.44        33.96 o
   0   4  13         82.69         72.64        12.53 o
   1   4  13       1351.78       1236.37        29.62 o
   2   4  13        740.71        617.08        21.24 o
   3   4  13        690.11        756.42        29.30 o
   4   4  13        309.28        385.83        23.58 o
   5   4  13        485.65        537.61        28.83 o
   6   4  13        239.96        279.02        22.06 o
   7   4  13          7.64         13.79        15.05 o
   8   4  13       1207.26       1170.84        43.58 o
   9   4  13        511.98        518.83        48.49 o
  10   4  13         70.21         18.98        28.61 o
  11   4  13        145.37        115.38        46.15 o
 -11   5  13         54.53         79.41        48.86 o
 -10   5  13        975.05       1150.57        68.83 o
  -9   5  13         37.14         47.22        22.15 o
  -8   5  13         84.53        150.49        21.60 o
  -7   5  13        247.96        279.25        19.24 o
  -6   5  13       2741.68       2554.41        55.81 o
  -5   5  13        334.53        306.64        19.92 o
  -4   5  13       6120.21       5915.70       105.85 o
  -3   5  13        376.12        406.40        22.88 o
  -2   5  13       1603.39       1506.52        40.15 o
  -1   5  13        737.28        798.56        29.68 o
   0   5  13      11829.71      11696.98       214.79 o
   1   5  13        739.17        767.51        26.87 o
   2   5  13       1597.11       1527.92        38.19 o
   3   5  13        379.01        378.40        28.20 o
   4   5  13       6100.26       5971.65       111.84 o
   5   5  13        332.95        342.05        23.14 o
   6   5  13       2741.88       2807.96        68.59 o
   7   5  13        249.46        238.75        23.10 o
   8   5  13         82.10         91.44        19.34 o
   9   5  13         38.13         80.42        23.58 o
  10   5  13        978.48       1167.23        72.56 o
  11   5  13         53.91        106.55        44.79 o
 -10   6  13         82.17        102.03        40.04 o
  -9   6  13        325.10        362.15        26.63 o
  -8   6  13          1.01         19.34        13.45 o
  -7   6  13       1540.72       1615.39        44.16 o
  -6   6  13        121.86        135.87        17.67 o
  -5   6  13        862.72        930.39        32.35 o
  -4   6  13        705.61        710.31        28.62 o
  -3   6  13        521.44        465.62        25.70 o
  -2   6  13        788.47        798.34        29.16 o
  -1   6  13       2087.99       2232.31       102.41 o
   0   6  13         95.72        128.27        23.81 o
   1   6  13       2092.08       2114.22        48.35 o
   2   6  13        803.71        800.82        29.07 o
   3   6  13        521.30        452.63        26.94 o
   4   6  13        700.32        714.14        29.31 o
   5   6  13        865.74        954.40        37.15 o
   6   6  13        125.87        143.38        19.39 o
   7   6  13       1544.85       1667.76        51.40 o
   8   6  13          1.19        -12.57        23.61 o
   9   6  13        326.78        322.70        33.57 o
  10   6  13         82.75        147.27        45.47 o
 -10   7  13        121.94        198.51        39.97 o
  -9   7  13        786.43        799.01        56.42 o
  -8   7  13        393.06        386.25        54.73 o
  -7   7  13         26.15         42.03        15.81 o
  -6   7  13        760.34        717.53        34.05 o
  -5   7  13        241.93        229.58        20.85 o
  -4   7  13        899.48        862.59        33.04 o
  -3   7  13         42.89         60.19        15.02 o
  -2   7  13        267.04        255.86        19.87 o
  -1   7  13         42.30         54.51        12.30 o
   0   7  13         11.09          9.10        14.11 o
   1   7  13         42.51         34.81        13.67 o
   2   7  13        270.26        272.05        20.56 o
   3   7  13         41.33         33.77        16.93 o
   4   7  13        878.32        902.09        38.13 o
   5   7  13        240.98        259.30        26.44 o
   6   7  13        764.31        685.96        34.89 o
   7   7  13         25.44         15.55        17.05 o
   8   7  13        393.19        400.04        33.90 o
   9   7  13        784.14        785.47        64.38 o
  -9   8  13         27.43        -19.04        29.19 o
  -8   8  13        301.25        374.99        38.63 o
  -7   8  13         24.83          4.28        18.15 o
  -6   8  13         92.32         77.58        18.67 o
  -5   8  13        616.01        560.60        36.17 o
  -4   8  13        736.24        716.20        32.47 o
  -3   8  13        282.26        316.78        23.08 o
  -2   8  13       1023.56       1012.17        40.38 o
  -1   8  13        935.30        934.29        37.32 o
   0   8  13        279.35        291.93        24.27 o
   1   8  13        931.08        956.90        40.34 o
   2   8  13       1024.14       1036.33        37.33 o
   3   8  13        283.75        272.13        25.89 o
   4   8  13        726.44        627.68        38.96 o
   5   8  13        615.48        625.28        39.49 o
   6   8  13         97.95         63.14        22.32 o
   7   8  13         24.38         -0.01        26.24 o
   8   8  13        291.10        321.43        87.55 o
   9   8  13         27.85         27.83        38.01 o
  -9   9  13        310.50        230.07        67.19 o
  -8   9  13        121.51        118.62        28.99 o
  -7   9  13        100.76         74.34        25.04 o
  -6   9  13        683.93        649.24        41.14 o
  -5   9  13        640.56        617.31        33.00 o
  -4   9  13        142.13        129.12        19.69 o
  -3   9  13       1220.97       1156.48        39.81 o
  -2   9  13        100.87        130.64        19.04 o
  -1   9  13          3.37         -5.71        16.61 o
   0   9  13       1905.64       1715.58        53.87 o
   1   9  13          3.29        -12.39        17.65 o
   2   9  13        100.61        139.87        20.60 o
   3   9  13       1224.78       1111.74        44.93 o
   4   9  13        133.90        124.79        30.41 o
   5   9  13        640.44        611.64        51.07 o
   6   9  13        696.85        677.49        52.11 o
   7   9  13        100.76        117.02        27.66 o
   8   9  13        124.99        193.42        48.86 o
  -8  10  13          4.50         11.38        23.15 o
  -7  10  13         27.81         36.28        25.03 o
  -6  10  13        637.23        711.00        40.41 o
  -5  10  13        681.63        636.14        38.11 o
  -4  10  13        385.03        406.59        30.71 o
  -3  10  13        181.88        165.60        21.25 o
  -2  10  13        220.05        173.92        20.43 o
  -1  10  13        641.50        595.16        42.51 o
   0  10  13          2.03          3.86        19.04 o
   1  10  13        645.38        631.42        39.01 o
   2  10  13        219.24        218.69        27.32 o
   3  10  13        182.74        161.75        22.88 o
   4  10  13        379.49        351.83        34.36 o
   5  10  13        676.40        511.14        47.37 o
   6  10  13        639.57        746.42       110.62 o
   7  10  13         27.66         98.41        59.72 o
  -7  11  13        206.84        159.11        30.95 o
  -6  11  13        677.51        559.14        43.22 o
  -5  11  13        295.76        289.05        28.93 o
  -4  11  13        716.54        753.20        44.92 o
  -3  11  13       1010.84       1033.49        44.64 o
  -2  11  13        712.89        738.59        38.01 o
  -1  11  13       1010.70        966.51        48.87 o
   0  11  13        242.57        294.31        35.11 o
   1  11  13       1009.22        928.38        46.82 o
   2  11  13        712.06        605.17        40.62 o
   3  11  13       1012.45        919.43        47.29 o
   4  11  13        714.43        631.00       119.79 o
   5  11  13        296.95        382.40        62.44 o
  -5  12  13        940.31        854.30        45.48 o
  -4  12  13         10.88          4.68        26.25 o
  -3  12  13        434.37        425.34        31.93 o
  -2  12  13        653.69        698.65        48.49 o
  -1  12  13       1569.46       1612.38        83.14 o
   0  12  13          9.93         -8.30        28.41 o
   1  12  13       1572.01       1636.54        80.63 o
   2  12  13        652.02        623.42        52.56 o
   3  12  13        435.47        376.78       139.13 o
  -3  13  13        252.56        227.26        28.79 o
  -2  13  13        205.42        200.74        27.03 o
  -1  13  13        690.32        596.66        57.35 o
   0  13  13          5.13        -21.67        34.57 o
   1  13  13        689.62        680.71        69.90 o
   0   0  14       8578.72       9181.67       165.92 o
   1   0  14        503.91        545.58        19.51 o
   2   0  14       6742.35       7331.54       102.04 o
   3   0  14        696.80        845.42        25.60 o
   4   0  14        793.03        861.20        26.61 o
   5   0  14        483.30        567.35        27.54 o
   6   0  14        531.73        484.33        26.32 o
   7   0  14         82.13         99.24        34.13 o
   8   0  14        825.47        736.05        35.75 o
   9   0  14        135.25        115.95        20.44 o
  10   0  14        560.13        686.58        98.75 o
  11   0  14         32.78          5.36        50.56 o
 -11   1  14        757.54        665.41        58.72 o
 -10   1  14        158.44        127.84        36.99 o
  -9   1  14         67.31         92.32        20.42 o
  -8   1  14       1751.76       1819.73        54.87 o
  -7   1  14        558.31        595.64        31.73 o
  -6   1  14        531.33        576.98        28.77 o
  -5   1  14       3852.69       3778.20        81.59 o
  -4   1  14       1941.44       1939.87        40.83 o
  -3   1  14       1796.10       1773.12        33.26 o
  -2   1  14       1318.78       1235.58        23.34 o
  -1   1  14       5881.78       5894.54        82.95 o
   0   1  14        364.54        488.50        20.48 o
   1   1  14       5873.48       5781.38        82.03 o
   2   1  14       1312.29       1200.07        23.85 o
   3   1  14       1801.01       1832.66        41.51 o
   4   1  14       1935.91       1998.69        59.18 o
   5   1  14       3845.13       3812.02        82.18 o
   6   1  14        528.38        561.21        28.78 o
   7   1  14        556.83        563.17        42.42 o
   8   1  14       1751.16       1811.14        69.87 o
   9   1  14         66.19         92.60        19.62 o
  10   1  14        155.83        185.78        37.88 o
  11   1  14        754.33        601.01        56.20 o
 -11   2  14        196.80        206.32        59.04 o
 -10   2  14         95.13         47.51        47.51 o
  -9   2  14        680.13        754.14        57.94 o
  -8   2  14       2650.65       2490.55        77.12 o
  -7   2  14         66.88         86.36        21.60 o
  -6   2  14       1097.37       1138.24        31.22 o
  -5   2  14       1289.50       1221.75        31.57 o
  -4   2  14       2564.20       2663.67        52.72 o
  -3   2  14       3418.72       3219.92        54.14 o
  -2   2  14        349.84        513.85        16.48 o
  -1   2  14       1754.08       1810.98        32.56 o
   0   2  14        738.66        824.66        18.67 o
   1   2  14       1754.56       1780.61        34.15 o
   2   2  14        349.09        504.26        18.03 o
   3   2  14       3417.83       3232.95        61.42 o
   4   2  14       2535.06       2634.65        53.84 o
   5   2  14       1288.74       1327.96        40.03 o
   6   2  14       1099.72       1132.26        57.40 o
   7   2  14         68.12         58.37        16.41 o
   8   2  14       2667.26       2559.00        67.65 o
   9   2  14        678.09        689.45        35.84 o
  10   2  14         91.66         79.47        33.89 o
  11   2  14        198.54        307.39        84.83 o
 -11   3  14         82.83         99.77        52.94 o
 -10   3  14        157.13         63.12        47.51 o
  -9   3  14         86.60        113.95        19.69 o
  -8   3  14       1056.35       1013.12        38.10 o
  -7   3  14        553.75        616.79        29.12 o
  -6   3  14        980.84        992.99        34.23 o
  -5   3  14        964.60        991.86        32.67 o
  -4   3  14        383.12        398.92        16.73 o
  -3   3  14       2842.70       2577.59        49.71 o
  -2   3  14       3108.01       3155.49        58.04 o
  -1   3  14       1989.61       1985.72        35.61 o
   0   3  14       1808.82       1582.38        31.61 o
   1   3  14       1989.18       1984.66        38.06 o
   2   3  14       3082.66       3128.17        54.53 o
   3   3  14       2849.62       2628.55        53.38 o
   4   3  14        389.11        419.84        22.37 o
   5   3  14        968.55       1043.50        35.49 o
   6   3  14        964.04       1052.28        37.57 o
   7   3  14        556.74        587.14        45.14 o
   8   3  14       1071.08       1093.77        42.43 o
   9   3  14         86.74         93.76        20.21 o
  10   3  14        155.02        148.28        46.49 o
  11   3  14         82.47         54.29        44.11 o
 -11   4  14        147.00         43.44        49.54 o
 -10   4  14         90.96         80.76        36.47 o
  -9   4  14         99.22        104.21        27.60 o
  -8   4  14         70.66         63.64        17.85 o
  -7   4  14        918.43        740.07        34.32 o
  -6   4  14       1191.42       1070.04        37.72 o
  -5   4  14        257.68        328.29        24.35 o
  -4   4  14        435.64        484.09        24.53 o
  -3   4  14       2720.60       2614.74        58.91 o
  -2   4  14        448.88        487.07        22.04 o
  -1   4  14        955.64       1088.12        27.46 o
   0   4  14         59.04         98.65        17.21 o
   1   4  14        949.68       1041.74        29.39 o
   2   4  14        444.28        463.12        23.72 o
   3   4  14       2721.22       2654.43        55.26 o
   4   4  14        453.12        542.44        24.27 o
   5   4  14        255.56        319.24        22.05 o
   6   4  14       1180.29       1103.22        38.86 o
   7   4  14        917.60        815.69        35.32 o
   8   4  14         74.34         41.74        17.35 o
   9   4  14         98.44        100.18        23.62 o
  10   4  14         86.26         93.77        33.22 o
  11   4  14        148.35        216.50        63.12 o
 -10   5  14         24.99         38.38        43.10 o
  -9   5  14        527.68        534.93        46.44 o
  -8   5  14        595.80        596.40        34.42 o
  -7   5  14        169.78        189.86        16.82 o
  -6   5  14       2086.18       2143.41        49.92 o
  -5   5  14       1600.78       1609.10        44.59 o
  -4   5  14        753.53        720.24        33.70 o
  -3   5  14         31.02         33.95        11.95 o
  -2   5  14       2593.52       2466.81        56.80 o
  -1   5  14        574.80        598.20        23.77 o
   0   5  14       2011.59       2071.87        50.82 o
   1   5  14        575.25        575.30        24.11 o
   2   5  14       2561.90       2414.46        47.76 o
   3   5  14         31.04         44.02        12.58 o
   4   5  14        754.13        724.94        28.44 o
   5   5  14       1598.33       1700.18        50.08 o
   6   5  14       2089.96       2064.54        56.33 o
   7   5  14        169.11        159.64        20.37 o
   8   5  14        604.96        701.92        37.42 o
   9   5  14        530.41        508.28        89.92 o
  10   5  14         25.26         43.44        38.68 o
 -10   6  14         71.89         77.91        40.66 o
  -9   6  14        242.21        278.31        49.20 o
  -8   6  14         63.33          9.46        13.50 o
  -7   6  14         34.76         33.90        14.67 o
  -6   6  14        114.54        110.24        16.85 o
  -5   6  14         32.94         43.01        14.55 o
  -4   6  14         40.65         67.23        19.01 o
  -3   6  14         61.88         79.60        14.60 o
  -2   6  14        284.62        270.88        19.04 o
  -1   6  14        183.66        194.80        21.64 o
   0   6  14       3105.40       3002.66        68.77 o
   1   6  14        184.75        166.70        16.15 o
   2   6  14        281.04        252.09        21.82 o
   3   6  14         61.90         38.90        15.20 o
   4   6  14         40.65         66.02        15.45 o
   5   6  14         32.69         38.82        15.47 o
   6   6  14        110.17        116.91        19.03 o
   7   6  14         34.74         54.64        17.94 o
   8   6  14         64.27         10.93        19.42 o
   9   6  14        241.87        334.06        44.32 o
  10   6  14         68.27        108.59        42.76 o
 -10   7  14         71.92         65.15        47.51 o
  -9   7  14        328.55        337.26        41.74 o
  -8   7  14        345.57        389.20        30.69 o
  -7   7  14        114.65        150.72        19.01 o
  -6   7  14        476.69        410.69        25.87 o
  -5   7  14        361.36        382.47        26.03 o
  -4   7  14       1082.93       1019.51        35.00 o
  -3   7  14        699.00        670.33        30.65 o
  -2   7  14       1309.70       1350.07        40.91 o
  -1   7  14        947.90        912.27        41.18 o
   0   7  14        187.20        204.06        21.94 o
   1   7  14        951.66        918.31        32.63 o
   2   7  14       1289.65       1331.01        39.92 o
   3   7  14        694.78        667.77        43.28 o
   4   7  14       1091.54       1038.68        41.23 o
   5   7  14        359.62        347.60        28.70 o
   6   7  14        473.45        377.23        32.42 o
   7   7  14        115.17        142.95        21.60 o
   8   7  14        349.82        318.94        35.20 o
   9   7  14        327.25        316.94        57.01 o
  -9   8  14          6.83         -4.22        28.07 o
  -8   8  14        570.25        659.01        39.66 o
  -7   8  14        622.43        582.14        37.22 o
  -6   8  14        277.30        220.88        22.26 o
  -5   8  14       1185.06       1138.24        39.70 o
  -4   8  14       1672.19       1799.83        54.83 o
  -3   8  14        299.06        335.56        27.25 o
  -2   8  14       1872.18       1760.47        49.95 o
  -1   8  14        829.10        805.09        35.72 o
   0   8  14        321.65        352.23        25.89 o
   1   8  14        830.57        814.30        38.48 o
   2   8  14       1874.29       1739.37        48.16 o
   3   8  14        297.66        267.17        23.01 o
   4   8  14       1674.79       1718.12        92.28 o
   5   8  14       1186.64       1123.37        80.18 o
   6   8  14        268.40        246.72        25.45 o
   7   8  14        620.58        609.87        40.20 o
   8   8  14        568.84        611.60        79.74 o
  -8   9  14        337.94        359.83        34.48 o
  -7   9  14         24.22         31.34        23.46 o
  -6   9  14        663.35        597.53        36.29 o
  -5   9  14        997.41        976.20        40.36 o
  -4   9  14        633.37        596.33        32.67 o
  -3   9  14         86.29        102.42        18.23 o
  -2   9  14        497.29        393.17        39.97 o
  -1   9  14        550.00        466.74        30.80 o
   0   9  14         33.55         38.07        19.21 o
   1   9  14        549.18        501.38        33.05 o
   2   9  14        502.92        438.61        28.28 o
   3   9  14         86.32         61.73        18.58 o
   4   9  14        630.59        551.81        38.96 o
   5   9  14        998.65        947.47        71.51 o
   6   9  14        653.84        646.29        43.65 o
   7   9  14         24.90         29.39        30.24 o
  -7  10  14         71.21         89.93        27.60 o
  -6  10  14         88.35        131.15        23.38 o
  -5  10  14         50.63         28.79        19.99 o
  -4  10  14        727.01        599.34        35.55 o
  -3  10  14        187.05        223.22        33.38 o
  -2  10  14        761.03        841.55        35.92 o
  -1  10  14        179.44        116.14        21.66 o
   0  10  14         20.63         30.27        20.03 o
   1  10  14        179.17        127.13        24.29 o
   2  10  14        762.44        776.32        43.53 o
   3  10  14        184.77        140.52        22.36 o
   4  10  14        729.56        536.30        40.20 o
   5  10  14         51.36         52.78        30.16 o
   6  10  14         91.74         86.59        32.77 o
  -6  11  14        444.97        449.36        42.85 o
  -5  11  14         49.59         54.42        22.13 o
  -4  11  14         33.79         65.86        20.07 o
  -3  11  14        206.37        249.52        25.76 o
  -2  11  14       2371.18       2451.68        67.42 o
  -1  11  14         37.28         45.72        25.81 o
   0  11  14         13.31         25.66        24.29 o
   1  11  14         36.85         71.40        23.65 o
   2  11  14       2377.98       2488.65        93.65 o
   3  11  14        205.62        236.87        29.86 o
   4  11  14         35.62         88.06        26.72 o
   5  11  14         48.52         66.51        51.58 o
  -5  12  14        455.26        388.53        33.12 o
  -4  12  14        167.34        138.56        24.90 o
  -3  12  14         10.39         17.23        18.51 o
  -2  12  14         32.82         43.79        19.53 o
  -1  12  14        159.18        126.43        53.22 o
   0  12  14         23.03         27.52        57.01 o
   1  12  14        160.19        208.58        38.65 o
   2  12  14         31.88         64.65        69.90 o
  -3  13  14         46.00         64.85        80.42 o
  -2  13  14         22.63          3.26        20.88 o
  -1  13  14         32.15         66.51        33.46 o
   0  13  14         19.80          2.27        33.35 o
   1   0  15        116.38        153.93         9.24 o
   2   0  15       6098.80       5908.04        84.15 o
   3   0  15         31.36          8.52         6.96 o
   4   0  15       1074.69       1163.16        30.30 o
   5   0  15       1325.34       1257.72        39.12 o
   6   0  15          8.28         14.90        13.32 o
   7   0  15       1154.99       1138.15        41.01 o
   8   0  15        162.86        215.79        23.35 o
   9   0  15       1048.83       1089.25        44.77 o
  10   0  15        882.73        965.23        67.45 o
  11   0  15         54.59         61.99        33.22 o
 -11   1  15         54.21         68.30        38.65 o
 -10   1  15        420.90        520.34        51.82 o
  -9   1  15        495.04        464.36        32.47 o
  -8   1  15        634.97        704.96        36.07 o
  -7   1  15         83.33        104.00        18.52 o
  -6   1  15        310.33        272.74        21.75 o
  -5   1  15        481.44        419.52        24.41 o
  -4   1  15       4514.36       4633.96       139.33 o
  -3   1  15       1208.80       1258.40        26.54 o
  -2   1  15       2003.86       1872.03        31.87 o
  -1   1  15        347.10        423.37        14.16 o
   0   1  15       3176.21       3030.35        43.42 o
   1   1  15        350.58        396.91        15.51 o
   2   1  15       1995.12       1848.87        32.49 o
   3   1  15       1213.32       1233.54        30.65 o
   4   1  15       4538.49       4635.26        94.76 o
   5   1  15        482.94        395.80        20.01 o
   6   1  15        320.12        305.84        23.13 o
   7   1  15         84.45        109.03        19.05 o
   8   1  15        643.88        690.13        43.30 o
   9   1  15        499.01        507.29        32.71 o
  10   1  15        421.50        441.96        59.38 o
  11   1  15         53.52         86.06        35.98 o
 -11   2  15        113.29         18.32        46.83 o
 -10   2  15        273.46        288.44        62.44 o
  -9   2  15        714.21        672.57        59.04 o
  -8   2  15         21.69         40.86        18.28 o
  -7   2  15        458.23        374.68        26.89 o
  -6   2  15        734.86        852.00        58.48 o
  -5   2  15        170.25        222.20        14.74 o
  -4   2  15        192.95        178.97        10.58 o
  -3   2  15        626.80        636.89        18.39 o
  -2   2  15        474.41        572.16        18.15 o
  -1   2  15        765.32       1031.96        22.47 o
   0   2  15        418.47        477.81        16.43 o
   1   2  15        762.46        971.14        23.58 o
   2   2  15        491.05        592.07        19.52 o
   3   2  15        620.85        664.90        22.99 o
   4   2  15        193.58        160.33        14.36 o
   5   2  15        170.75        216.04        16.72 o
   6   2  15        719.98        914.27        35.36 o
   7   2  15        462.65        425.28        28.29 o
   8   2  15         19.49         25.66        16.71 o
   9   2  15        710.15        790.05        44.65 o
  10   2  15        270.73        280.44       127.25 o
  11   2  15        112.80        143.20        57.69 o
 -11   3  15         90.61         80.76        50.22 o
 -10   3  15        410.16        382.77        66.51 o
  -9   3  15        232.26        291.42        84.50 o
  -8   3  15       1236.06       1301.62        54.75 o
  -7   3  15        165.04        177.81        27.92 o
  -6   3  15        752.72        790.19        30.55 o
  -5   3  15        913.72        824.69        29.52 o
  -4   3  15        506.63        512.13        19.10 o
  -3   3  15       1567.62       1513.30        45.62 o
  -2   3  15        349.48        376.33        16.84 o
  -1   3  15        241.30        240.49        12.12 o
   0   3  15        122.36         91.38         9.99 o
   1   3  15        246.53        264.70        14.28 o
   2   3  15        347.94        388.87        17.38 o
   3   3  15       1570.13       1550.89        37.60 o
   4   3  15        524.08        555.29        23.79 o
   5   3  15        906.38        828.35        31.32 o
   6   3  15        746.86        799.00        42.81 o
   7   3  15        168.28        138.14        24.39 o
   8   3  15       1221.64       1307.24        46.53 o
   9   3  15        234.90        258.16        42.45 o
  10   3  15        410.75        471.42        61.76 o
 -10   4  15        279.53        346.13        65.15 o
  -9   4  15         31.85         21.16        25.35 o
  -8   4  15         18.17         44.74        17.33 o
  -7   4  15         44.69         65.88        16.54 o
  -6   4  15       2129.78       2223.55        57.25 o
  -5   4  15        701.36        628.60        27.50 o
  -4   4  15        483.05        498.96        24.56 o
  -3   4  15          2.41          8.19         9.18 o
  -2   4  15       2508.35       2464.01        60.72 o
  -1   4  15        705.07        664.08        25.14 o
   0   4  15        206.61        262.89        34.03 o
   1   4  15        704.93        633.03        21.82 o
   2   4  15       2516.74       2430.84        46.78 o
   3   4  15          2.20         42.89        11.52 o
   4   4  15        483.99        523.94        43.77 o
   5   4  15        699.89        658.20        29.47 o
   6   4  15       2149.63       2219.01        58.74 o
   7   4  15         45.73         42.42        16.70 o
   8   4  15         20.51         19.92        16.71 o
   9   4  15         32.93         31.99        28.21 o
  10   4  15        281.01        297.41        46.57 o
 -10   5  15        128.93        158.81        52.94 o
  -9   5  15        170.70        147.34        45.47 o
  -8   5  15        720.01        653.89        34.99 o
  -7   5  15        381.03        405.56        21.54 o
  -6   5  15       1635.26       1560.71        41.08 o
  -5   5  15        706.27        680.64        27.56 o
  -4   5  15       1281.11       1214.90        38.42 o
  -3   5  15        303.67        325.30        20.57 o
  -2   5  15       1250.38       1237.94        35.40 o
  -1   5  15        204.63        274.93        22.83 o
   0   5  15       4064.84       3984.60        83.22 o
   1   5  15        203.99        270.49        16.74 o
   2   5  15       1255.07       1254.44        32.12 o
   3   5  15        303.47        355.73        29.13 o
   4   5  15       1265.41       1200.35        36.22 o
   5   5  15        709.07        732.83        30.21 o
   6   5  15       1640.51       1487.78        47.18 o
   7   5  15        379.51        354.81        26.01 o
   8   5  15        708.61        614.49        35.76 o
   9   5  15        170.57        138.55        47.85 o
  10   5  15        125.37        204.28        50.90 o
 -10   6  15        260.80        268.08        61.08 o
  -9   6  15        343.59        307.17        40.17 o
  -8   6  15        113.09         84.54        17.92 o
  -7   6  15        179.33        181.74        18.94 o
  -6   6  15        276.15        349.16        22.97 o
  -5   6  15        454.88        438.76        24.72 o
  -4   6  15        233.26        229.61        20.61 o
  -3   6  15        877.18        843.35        40.26 o
  -2   6  15       1078.73       1081.93        34.61 o
  -1   6  15        692.65        700.54        38.59 o
   0   6  15       1312.57       1451.98        42.74 o
   1   6  15        689.31        669.59        27.64 o
   2   6  15       1087.09       1098.86        34.19 o
   3   6  15        872.20        896.81        32.67 o
   4   6  15        229.71        185.50        19.06 o
   5   6  15        456.73        529.90        29.88 o
   6   6  15        278.48        360.14        26.65 o
   7   6  15        177.42        188.16        33.06 o
   8   6  15        110.18         73.50        25.81 o
   9   6  15        348.17        305.38        50.11 o
  -9   7  15          3.81          8.11        28.69 o
  -8   7  15        179.65        217.83        39.98 o
  -7   7  15        435.11        382.48        27.44 o
  -6   7  15        154.96        118.25        18.82 o
  -5   7  15         39.49         54.93        16.01 o
  -4   7  15         36.94         20.67        16.60 o
  -3   7  15        480.26        511.53        28.37 o
  -2   7  15        158.01        197.80        18.52 o
  -1   7  15       1283.10       1325.19        83.41 o
   0   7  15        769.31        817.76        39.48 o
   1   7  15       1278.93       1219.14        37.96 o
   2   7  15        158.72        207.38        20.03 o
   3   7  15        483.90        516.21        27.58 o
   4   7  15         40.18         34.69        16.55 o
   5   7  15         37.60         53.88        21.23 o
   6   7  15        155.09        145.99        21.22 o
   7   7  15        435.65        400.44        35.84 o
   8   7  15        183.25        167.77        36.97 o
   9   7  15          4.05         44.79        44.11 o
  -9   8  15         48.00         28.63        30.43 o
  -8   8  15        126.77         88.39        23.73 o
  -7   8  15        301.26        286.41        30.17 o
  -6   8  15          7.40         -3.40        27.53 o
  -5   8  15        971.54        977.63        37.58 o
  -4   8  15        242.37        201.56        20.66 o
  -3   8  15        135.85        208.41        21.77 o
  -2   8  15       1530.35       1447.70        51.82 o
  -1   8  15        739.55        737.41        35.40 o
   0   8  15       1500.00       1418.06        47.97 o
   1   8  15        741.80        714.50        37.18 o
   2   8  15       1515.50       1348.40        42.57 o
   3   8  15        134.81        166.08        20.57 o
   4   8  15        245.12        225.57        25.46 o
   5   8  15        968.65        973.17        47.35 o
   6   8  15          5.95        -18.94        18.94 o
   7   8  15        301.92        252.61        40.23 o
   8   8  15        131.72        124.88        44.11 o
  -8   9  15         11.04          2.79        29.51 o
  -7   9  15          5.22        -21.95        22.45 o
  -6   9  15        583.54        595.97        36.90 o
  -5   9  15        320.14        290.69        31.44 o
  -4   9  15        468.19        512.50        29.83 o
  -3   9  15        830.84        806.69        35.23 o
  -2   9  15        395.56        390.93        26.24 o
  -1   9  15        463.52        454.80        34.19 o
   0   9  15        355.51        324.09        27.18 o
   1   9  15        467.72        410.94        30.77 o
   2   9  15        399.65        350.62        31.87 o
   3   9  15        828.67        788.32        36.23 o
   4   9  15        468.42        460.57        33.99 o
   5   9  15        323.70        275.23        32.07 o
   6   9  15        575.29        588.21        55.42 o
   7   9  15          5.26          8.29        28.97 o
  -7  10  15         31.12        -22.48        22.48 o
  -6  10  15        104.42         76.88        22.05 o
  -5  10  15        275.52        187.84        24.93 o
  -4  10  15        150.70        123.99        23.41 o
  -3  10  15        260.61        221.72        24.37 o
  -2  10  15         78.88         92.56        18.66 o
  -1  10  15        611.23        477.22        34.68 o
   0  10  15        784.84        721.13        39.89 o
   1  10  15        610.94        473.30        33.66 o
   2  10  15         74.40        107.62        24.52 o
   3  10  15        263.45        275.64        26.74 o
   4  10  15        148.72        129.62        35.75 o
   5  10  15        273.13        234.48        39.59 o
   6  10  15        108.92        160.17        60.40 o
  -6  11  15        573.04        565.43        44.02 o
  -5  11  15        292.28        271.37        28.86 o
  -4  11  15        944.59       1014.61        50.84 o
  -3  11  15       1136.60       1098.85        45.77 o
  -2  11  15       1217.58       1231.19        41.05 o
  -1  11  15         90.72         74.09        24.29 o
   0  11  15        336.99        411.40        65.61 o
   1  11  15         90.00        106.12        24.58 o
   2  11  15       1214.29       1253.67        54.14 o
   3  11  15       1136.50       1074.68        51.98 o
   4  11  15        934.02        864.31        58.60 o
   5  11  15        289.71        352.91        73.30 o
  -4  12  15        111.86        115.72        24.78 o
  -3  12  15        133.64        127.48        23.08 o
  -2  12  15        871.26        769.40        50.97 o
  -1  12  15         37.78         49.87        26.82 o
   0  12  15        494.79        454.82        46.10 o
   1  12  15         37.31         51.47        26.02 o
   2  12  15        867.49        958.19        74.75 o
   3  12  15        132.50        133.02        58.37 o
   4  12  15        114.78         24.43        50.90 o
  -2  13  15        214.37        139.13        70.58 o
  -1  13  15         24.87         40.95        38.74 o
   0   0  16        932.47        948.96        27.25 o
   1   0  16       3571.80       3239.44        49.78 o
   2   0  16        333.85        338.81        14.65 o
   3   0  16          1.71         -2.90         7.09 o
   4   0  16       2534.02       2542.69        45.67 o
   5   0  16        338.84        258.71        20.46 o
   6   0  16       1002.17       1059.51        38.19 o
   7   0  16        521.53        423.60        27.59 o
   8   0  16          3.48         45.57        16.87 o
   9   0  16       1432.91       1425.23        63.83 o
  10   0  16         94.96         14.21        30.88 o
  11   0  16        508.92        476.43        84.16 o
 -11   1  16          0.81        -14.93        46.15 o
 -10   1  16         37.92         17.77        30.33 o
  -9   1  16        193.88        101.68        35.50 o
  -8   1  16        437.76        372.40        27.91 o
  -7   1  16        760.77        697.90        34.24 o
  -6   1  16        203.82        231.27        23.76 o
  -5   1  16        382.25        342.34        22.21 o
  -4   1  16        527.66        451.45        17.45 o
  -3   1  16         19.73         35.89         8.12 o
  -2   1  16        311.75        365.76        13.47 o
  -1   1  16        466.20        478.00        14.86 o
   0   1  16        278.48        338.74        13.66 o
   1   1  16        467.72        516.29        21.94 o
   2   1  16        303.21        358.74        14.14 o
   3   1  16         21.64         41.24         9.89 o
   4   1  16        532.28        491.08        21.65 o
   5   1  16        382.63        364.27        19.60 o
   6   1  16        205.65        231.95        21.28 o
   7   1  16        758.17        701.18        34.13 o
   8   1  16        435.09        387.22        28.77 o
   9   1  16        191.26        204.90        37.65 o
  10   1  16         37.24          6.85        32.58 o
 -11   2  16        174.84        196.14        60.40 o
 -10   2  16         88.80         89.59        51.58 o
  -9   2  16        261.71        317.62        60.40 o
  -8   2  16       1018.12       1095.90        52.59 o
  -7   2  16        337.41        354.21        27.71 o
  -6   2  16        553.31        556.49        29.59 o
  -5   2  16       1229.00       1276.16        33.07 o
  -4   2  16        768.92        746.39        20.48 o
  -3   2  16        381.09        449.18        28.88 o
  -2   2  16         85.15        123.42        11.49 o
  -1   2  16       2970.76       2771.42        46.87 o
   0   2  16        101.64         81.90         8.36 o
   1   2  16       2974.58       2758.93        48.46 o
   2   2  16         85.94        119.33        11.25 o
   3   2  16        378.74        431.90        20.09 o
   4   2  16        752.03        757.69        26.15 o
   5   2  16       1243.25       1332.58        36.24 o
   6   2  16        553.95        542.85        29.61 o
   7   2  16        339.36        327.51        24.99 o
   8   2  16       1020.10       1131.01        45.84 o
   9   2  16        259.68        279.62        41.97 o
  10   2  16         90.35        131.35        46.83 o
 -10   3  16         56.57         42.76        44.79 o
  -9   3  16        383.76        437.75        70.58 o
  -8   3  16        155.74        126.51        24.15 o
  -7   3  16        603.74        576.68        27.40 o
  -6   3  16         53.26         36.34        20.78 o
  -5   3  16        111.04        124.04        14.75 o
  -4   3  16        738.19        682.14        21.88 o
  -3   3  16       2171.68       2011.95        41.80 o
  -2   3  16        385.43        384.06        17.19 o
  -1   3  16       1361.17       1278.87        26.86 o
   0   3  16       2816.25       2928.87        51.16 o
   1   3  16       1362.59       1238.35        28.73 o
   2   3  16        375.25        387.41        17.73 o
   3   3  16       2149.78       2004.75        49.90 o
   4   3  16        736.40        738.23        26.87 o
   5   3  16        110.73        115.33        14.86 o
   6   3  16         49.42         65.89        16.08 o
   7   3  16        597.26        537.52        33.80 o
   8   3  16        155.48        104.43        19.68 o
   9   3  16        386.54        380.37        81.78 o
  10   3  16         54.70         82.25        35.62 o
 -10   4  16        288.05        298.62        61.76 o
  -9   4  16        236.78        239.04        30.88 o
  -8   4  16        229.51        294.77        30.60 o
  -7   4  16        287.57        247.45        27.25 o
  -6   4  16         13.33         16.34        13.73 o
  -5   4  16        421.25        362.83        17.07 o
  -4   4  16        509.97        568.01        21.99 o
  -3   4  16        183.63        201.64        14.35 o
  -2   4  16        176.99        227.25        14.67 o
  -1   4  16        967.72        973.64        23.34 o
   0   4  16        105.26        104.60        11.93 o
   1   4  16        955.26        939.77        26.14 o
   2   4  16        177.04        241.32        15.62 o
   3   4  16        182.96        197.84        16.36 o
   4   4  16        513.59        558.20        24.93 o
   5   4  16        421.14        407.03        25.09 o
   6   4  16         12.31         41.86        15.62 o
   7   4  16        284.69        233.67        23.35 o
   8   4  16        235.46        219.84        23.83 o
   9   4  16        240.50        254.61        41.05 o
  10   4  16        294.67        312.87        59.04 o
 -10   5  16         58.09         57.01        50.22 o
  -9   5  16         40.10         41.20        26.73 o
  -8   5  16        358.57        395.44        39.24 o
  -7   5  16        147.31        206.36        21.97 o
  -6   5  16        849.97        909.45        31.49 o
  -5   5  16         20.37         49.46        13.43 o
  -4   5  16          8.19         28.33        13.18 o
  -3   5  16        497.33        465.81        31.15 o
  -2   5  16        266.38        252.49        17.87 o
  -1   5  16         37.60          8.27         9.32 o
   0   5  16         11.74          4.27        10.84 o
   1   5  16         36.58         25.38        11.30 o
   2   5  16        266.59        261.69        17.11 o
   3   5  16        504.47        449.12        23.93 o
   4   5  16          8.09         15.03        13.07 o
   5   5  16         20.19         53.58        18.52 o
   6   5  16        859.47        921.40        37.77 o
   7   5  16        147.79        214.67        22.94 o
   8   5  16        357.70        321.69        55.99 o
   9   5  16         39.42        105.44        33.89 o
  -9   6  16        131.89        139.91        33.93 o
  -8   6  16        245.57        250.74        22.10 o
  -7   6  16         82.17         64.76        15.61 o
  -6   6  16        867.87        844.55        32.62 o
  -5   6  16        733.63        664.55        29.85 o
  -4   6  16        102.64         98.60        17.28 o
  -3   6  16       1211.34       1235.54        52.31 o
  -2   6  16        240.27        208.38        17.66 o
  -1   6  16        313.86        318.30        28.79 o
   0   6  16         74.31        115.36        24.49 o
   1   6  16        316.46        314.09        20.74 o
   2   6  16        240.01        250.55        18.26 o
   3   6  16       1212.50       1210.98        49.37 o
   4   6  16        104.13        105.35        17.52 o
   5   6  16        731.35        690.45        31.65 o
   6   6  16        878.23        947.26        62.25 o
   7   6  16         81.62         83.11        20.90 o
   8   6  16        250.19        272.39        40.28 o
   9   6  16        134.38        200.89        50.22 o
  -9   7  16         36.05          4.15        29.17 o
  -8   7  16        710.90        756.26        62.28 o
  -7   7  16        396.33        421.91        28.62 o
  -6   7  16         79.48         89.60        17.46 o
  -5   7  16          1.78         13.85        15.37 o
  -4   7  16       2756.97       2730.39        61.81 o
  -3   7  16       1481.67       1434.12        44.20 o
  -2   7  16        265.30        251.22        19.69 o
  -1   7  16        553.04        597.37        40.12 o
   0   7  16        661.10        630.09        32.58 o
   1   7  16        558.00        593.21        31.63 o
   2   7  16        271.85        246.94        21.27 o
   3   7  16       1465.38       1389.60        42.33 o
   4   7  16       2742.10       2682.12        63.06 o
   5   7  16          1.74         24.48        17.06 o
   6   7  16         75.14         86.81        20.00 o
   7   7  16        403.26        342.06        44.49 o
   8   7  16        705.14        733.64        90.60 o
  -8   8  16        321.49        360.72        44.82 o
  -7   8  16          2.21        -15.92        19.96 o
  -6   8  16         92.42         84.20        20.47 o
  -5   8  16         63.82         53.96        17.48 o
  -4   8  16       2168.24       2221.36        73.03 o
  -3   8  16         86.44         76.52        17.03 o
  -2   8  16        989.31        997.58        36.89 o
  -1   8  16        454.81        505.23        30.47 o
   0   8  16        526.91        528.80        31.63 o
   1   8  16        455.19        533.06        32.33 o
   2   8  16        993.98        979.39        49.28 o
   3   8  16         87.13         84.75        18.40 o
   4   8  16       2176.12       2158.82        63.98 o
   5   8  16         63.39         52.60        19.32 o
   6   8  16         95.78         44.85        29.96 o
   7   8  16          2.24        -15.61        24.43 o
  -8   9  16        198.89        128.56        36.69 o
  -7   9  16        183.06         98.52        43.70 o
  -6   9  16        209.36        233.46        26.24 o
  -5   9  16         38.84         23.40        18.09 o
  -4   9  16        834.59        833.21        39.79 o
  -3   9  16       1033.69        982.69        37.34 o
  -2   9  16        137.83        154.54        19.42 o
  -1   9  16         22.77         -1.63        16.98 o
   0   9  16          6.61          9.85        18.41 o
   1   9  16         21.48         30.49        19.67 o
   2   9  16        133.14        187.69        21.88 o
   3   9  16       1043.22        979.26        40.30 o
   4   9  16        829.31        757.44        41.63 o
   5   9  16         38.80        102.38        32.58 o
   6   9  16        202.61        213.51        38.65 o
  -7  10  16         70.08         17.72        32.94 o
  -6  10  16          0.68         19.53        19.30 o
  -5  10  16         52.47         28.57        19.59 o
  -4  10  16        163.99         91.17        21.28 o
  -3  10  16        478.13        487.02        31.52 o
  -2  10  16         56.47         49.65        17.50 o
  -1  10  16        233.80        196.23        30.56 o
   0  10  16          3.36         31.03        20.38 o
   1  10  16        229.55        206.82        26.95 o
   2  10  16         55.90         18.55        39.58 o
   3  10  16        475.88        440.05        35.19 o
   4  10  16        161.08        126.35        28.83 o
   5  10  16         49.38          6.86        34.61 o
   6  10  16          0.49        -42.08        67.87 o
  -5  11  16         47.69         35.71        21.57 o
  -4  11  16         16.28          0.55        18.06 o
  -3  11  16        371.56        338.43        28.59 o
  -2  11  16        591.50        561.78        42.62 o
  -1  11  16         17.21        -12.09        21.66 o
   0  11  16        510.33        511.15        47.81 o
   1  11  16         17.62         -7.72        22.97 o
   2  11  16        597.11        574.87        59.46 o
   3  11  16        367.24        322.09        33.78 o
   4  11  16         17.10         27.15        49.54 o
   5  11  16         47.52          6.11        48.86 o
  -4  12  16         30.06         58.21        25.47 o
  -3  12  16        110.39         99.57        30.66 o
  -2  12  16         99.18         96.72        27.94 o
  -1  12  16        417.16        442.44        52.60 o
   0  12  16        418.27        477.82        67.83 o
   1  12  16        415.27        212.43        59.72 o
   2  12  16         98.73        120.13        56.33 o
   3  12  16        111.14         62.44        52.94 o
   4  12  16         27.73         18.32        51.58 o
   1   0  17       1066.10       1008.81        22.01 o
   2   0  17         94.85        135.00         9.98 o
   3   0  17        984.12        947.47        21.81 o
   4   0  17         18.28         32.53         8.34 o
   5   0  17       1396.79       1326.22        41.36 o
   6   0  17        144.99        132.60        18.71 o
   7   0  17        456.91        389.85        27.50 o
   8   0  17        102.71        106.78        20.11 o
   9   0  17        539.08        547.35        55.31 o
  10   0  17        482.71        404.67        48.71 o
 -10   1  17        388.99        355.65        48.23 o
  -9   1  17          3.42         -1.23        29.23 o
  -8   1  17        441.26        413.48        30.07 o
  -7   1  17        142.94        161.10        20.64 o
  -6   1  17       1090.51       1025.35        38.50 o
  -5   1  17        280.72        244.13        22.24 o
  -4   1  17       1777.43       1758.20        34.92 o
  -3   1  17        255.02        279.46        13.79 o
  -2   1  17       1801.11       1858.23        32.59 o
  -1   1  17        795.53        613.82        17.91 o
   0   1  17       1271.62       1205.35        23.70 o
   1   1  17        787.02        605.36        17.36 o
   2   1  17       1795.26       1872.38        33.53 o
   3   1  17        254.37        292.64        20.25 o
   4   1  17       1783.12       1727.16        40.49 o
   5   1  17        281.78        233.10        17.23 o
   6   1  17       1096.75       1065.20        39.17 o
   7   1  17        141.50        136.89        21.65 o
   8   1  17        445.95        434.72        38.60 o
   9   1  17          3.98         34.61        41.40 o
  10   1  17        394.73        334.60        46.31 o
 -10   2  17        127.84        149.31        56.33 o
  -9   2  17        119.94        120.80        50.90 o
  -8   2  17        232.40        210.51        24.38 o
  -7   2  17       1798.75       1790.07        54.47 o
  -6   2  17        171.61        164.27        22.04 o
  -5   2  17        618.94        601.31        34.68 o
  -4   2  17        524.30        504.98        17.37 o
  -3   2  17       1326.86       1200.99        27.20 o
  -2   2  17        149.47        163.53         9.94 o
  -1   2  17        360.98        370.98        15.13 o
   0   2  17       5445.65       5516.06        79.62 o
   1   2  17        353.95        382.95        16.38 o
   2   2  17        148.84        160.86        12.39 o
   3   2  17       1316.47       1224.48        31.43 o
   4   2  17        525.67        493.61        22.38 o
   5   2  17        618.18        645.79        29.36 o
   6   2  17        164.98        119.97        17.54 o
   7   2  17       1791.46       1778.92        53.42 o
   8   2  17        229.07        243.00        40.75 o
   9   2  17        119.09         96.85        35.50 o
  10   2  17        127.15        158.86        41.55 o
 -10   3  17        333.70        310.16        65.83 o
  -9   3  17        668.10        687.50        83.48 o
  -8   3  17          5.49        -13.71        19.00 o
  -7   3  17        480.38        479.72        29.65 o
  -6   3  17       2130.72       2382.48        87.28 o
  -5   3  17       1258.13       1266.35        37.66 o
  -4   3  17        816.61        901.99        32.85 o
  -3   3  17        364.52        414.31        18.15 o
  -2   3  17       2792.45       2669.72        51.81 o
  -1   3  17        616.25        537.57        17.42 o
   0   3  17        241.34        345.86        15.83 o
   1   3  17        620.38        546.43        20.29 o
   2   3  17       2786.47       2706.13        50.11 o
   3   3  17        368.14        399.30        18.79 o
   4   3  17        823.71        904.48        29.77 o
   5   3  17       1237.65       1306.05        37.63 o
   6   3  17       2116.62       2305.41        60.67 o
   7   3  17        483.30        457.88        29.05 o
   8   3  17          5.10         -2.25        17.77 o
   9   3  17        676.58        698.91        76.01 o
 -10   4  17        204.82        198.85        57.69 o
  -9   4  17        532.15        409.24        63.80 o
  -8   4  17       2562.80       2468.44        85.76 o
  -7   4  17          3.70         -5.68        14.20 o
  -6   4  17        274.55        296.53        38.87 o
  -5   4  17        208.67        187.08        14.40 o
  -4   4  17       1424.56       1506.85        36.13 o
  -3   4  17        409.24        372.24        18.52 o
  -2   4  17       1091.75       1145.40        29.70 o
  -1   4  17       2075.67       1975.62        41.91 o
   0   4  17        280.32        276.33        16.63 o
   1   4  17       2066.36       1921.27        39.79 o
   2   4  17       1097.15       1149.52        30.18 o
   3   4  17        412.97        357.13        19.00 o
   4   4  17       1429.56       1501.25        40.48 o
   5   4  17        208.46        182.54        17.98 o
   6   4  17        280.89        317.29        24.82 o
   7   4  17          3.19         13.38        16.17 o
   8   4  17       2575.09       2543.97       180.87 o
   9   4  17        526.78        521.21        51.87 o
 -10   5  17         20.15        138.45        53.62 o
  -9   5  17        481.11        479.83        68.55 o
  -8   5  17        260.18        366.45        37.18 o
  -7   5  17        737.45        627.46        33.35 o
  -6   5  17        223.35        234.85        18.73 o
  -5   5  17        129.07        115.53        16.02 o
  -4   5  17        749.30        744.02        31.20 o
  -3   5  17         46.20         42.85        11.51 o
  -2   5  17        232.09        249.83        19.62 o
  -1   5  17        392.53        476.88        25.50 o
   0   5  17       1848.29       1857.83        45.11 o
   1   5  17        395.80        461.46        20.93 o
   2   5  17        229.41        253.60        17.30 o
   3   5  17         44.96         25.46        12.51 o
   4   5  17        735.53        685.59        29.34 o
   5   5  17        124.16        117.51        17.35 o
   6   5  17        221.01        220.40        22.37 o
   7   5  17        735.38        731.87        36.20 o
   8   5  17        257.00        303.14        65.49 o
   9   5  17        478.47        437.07        65.15 o
  -9   6  17        325.37        237.54        54.29 o
  -8   6  17         76.13        108.57        36.31 o
  -7   6  17        324.59        307.82        23.19 o
  -6   6  17        720.34        762.95        31.48 o
  -5   6  17        293.98        301.31        21.78 o
  -4   6  17        725.73        702.33        32.26 o
  -3   6  17       2796.97       2708.97        64.36 o
  -2   6  17        430.48        421.92        23.38 o
  -1   6  17         65.92         72.25        17.68 o
   0   6  17       6624.51       6615.88       131.38 o
   1   6  17         62.97         25.62        14.34 o
   2   6  17        439.23        477.64        24.76 o
   3   6  17       2822.60       2734.97        55.64 o
   4   6  17        727.52        706.19        31.83 o
   5   6  17        293.53        336.55        24.01 o
   6   6  17        724.86        751.75        36.26 o
   7   6  17        332.60        390.40        66.85 o
   8   6  17         74.08         40.54        28.89 o
  -9   7  17        358.51        322.37        61.08 o
  -8   7  17        586.92        602.07        50.13 o
  -7   7  17        583.23        519.52        30.66 o
  -6   7  17         22.03         30.52        17.95 o
  -5   7  17       1042.99        957.46        41.79 o
  -4   7  17         12.51         37.93        15.90 o
  -3   7  17       1548.39       1424.76        50.55 o
  -2   7  17       2531.36       2441.77        59.99 o
  -1   7  17       2500.12       2374.58        72.92 o
   0   7  17        742.67       1254.88        86.19 o
   1   7  17       2479.05       2266.78        61.12 o
   2   7  17       2526.99       2405.63        57.06 o
   3   7  17       1543.30       1492.14        40.85 o
   4   7  17         11.06          2.76        15.41 o
   5   7  17       1028.91        935.00        37.63 o
   6   7  17         21.09         13.16        20.63 o
   7   7  17        584.54        493.21        62.10 o
   8   7  17        593.21        637.96       111.30 o
  -8   8  17        142.90        106.90        34.11 o
  -7   8  17         22.47         -1.40        23.20 o
  -6   8  17         20.14         -6.75        17.15 o
  -5   8  17        252.19        210.24        23.51 o
  -4   8  17       1024.88       1020.09        37.90 o
  -3   8  17        415.61        389.60        26.29 o
  -2   8  17       1396.76       1357.92        42.99 o
  -1   8  17         58.43         54.03        21.84 o
   0   8  17        309.30        327.60        26.64 o
   1   8  17         58.35         37.98        18.90 o
   2   8  17       1382.48       1398.27        44.17 o
   3   8  17        414.29        413.33        27.26 o
   4   8  17       1029.93       1062.91        60.28 o
   5   8  17        252.60        272.83        33.30 o
   6   8  17         20.34         29.51        28.62 o
   7   8  17         20.83         -9.42        30.88 o
  -7   9  17        140.11        168.58        29.89 o
  -6   9  17         97.51         60.23        20.45 o
  -5   9  17       1001.17        944.36        42.68 o
  -4   9  17        359.53        403.01        29.63 o
  -3   9  17        479.23        493.21        29.98 o
  -2   9  17        126.48        143.02        25.88 o
  -1   9  17        931.91        805.10        39.78 o
   0   9  17        374.80        400.77        30.03 o
   1   9  17        937.26        863.22        50.94 o
   2   9  17        129.00        162.46        21.29 o
   3   9  17        482.93        457.70        30.44 o
   4   9  17        363.29        410.07        33.49 o
   5   9  17       1007.79       1011.66        67.67 o
   6   9  17         95.29         93.70        34.79 o
  -6  10  17        204.09        184.53        26.99 o
  -5  10  17         21.66         27.75        19.40 o
  -4  10  17        798.20        746.58        39.38 o
  -3  10  17        158.76        154.59        25.13 o
  -2  10  17          5.36        -11.54        39.36 o
  -1  10  17         65.96         37.15        20.64 o
   0  10  17        198.00        187.48        31.69 o
   1  10  17         68.38          6.22        21.07 o
   2  10  17          6.50         17.78        21.61 o
   3  10  17        160.05        116.05        36.93 o
   4  10  17        797.25        694.66        41.40 o
   5  10  17         21.52         16.97        50.22 o
  -5  11  17        345.03        355.49        31.20 o
  -4  11  17         84.27         76.76        21.88 o
  -3  11  17         20.47         33.51        18.39 o
  -2  11  17        540.21        517.26        46.81 o
  -1  11  17        138.21        166.95        27.19 o
   0  11  17          1.45          0.59        28.50 o
   1  11  17        138.41        124.89        28.05 o
   2  11  17        538.52        513.33        43.02 o
   3  11  17         20.75         13.34        92.98 o
   4  11  17         80.79         85.51        52.26 o
  -3  12  17        307.95        287.95        28.40 o
  -2  12  17         52.10         62.36        24.62 o
  -1  12  17        115.70        146.49        45.13 o
   0  12  17        734.98        661.03        82.12 o
   1  12  17        117.75        209.03        60.40 o
   2  12  17         54.51        100.44        53.62 o
   3  12  17        305.01        299.30        70.58 o
   0   0  18       2529.13       2671.36        57.38 o
   1   0  18       1545.39       1327.75        26.59 o
   2   0  18          0.95         22.42         7.71 o
   3   0  18        935.51        962.22        22.62 o
   4   0  18        344.62        381.64        20.50 o
   5   0  18       1984.34       1747.29        62.01 o
   6   0  18       1970.97       1751.06        50.91 o
   7   0  18          2.63          3.54        17.04 o
   8   0  18        518.93        562.48        36.67 o
   9   0  18        838.33        954.95        88.91 o
  10   0  18         84.78        111.98        59.04 o
 -10   1  18        233.16        337.30        71.26 o
  -9   1  18         36.73         40.75        32.26 o
  -8   1  18        300.27        350.69        30.88 o
  -7   1  18        612.89        626.43        33.64 o
  -6   1  18         45.42         37.18        15.84 o
  -5   1  18         12.88         17.76        19.10 o
  -4   1  18       1390.70       1264.68        28.61 o
  -3   1  18         89.70        124.17         9.85 o
  -2   1  18       1423.37       1250.96        25.39 o
  -1   1  18        998.24       1042.80        30.30 o
   0   1  18          5.09         -6.52         9.27 o
   1   1  18       1001.06       1028.63        23.19 o
   2   1  18       1415.88       1274.86        26.65 o
   3   1  18         86.09        133.99        12.09 o
   4   1  18       1390.52       1341.85        35.29 o
   5   1  18         13.20         37.25        14.70 o
   6   1  18         44.56         37.45        16.02 o
   7   1  18        606.23        603.94        33.15 o
   8   1  18        298.27        285.09        35.85 o
   9   1  18         35.65         33.30        29.82 o
 -10   2  18         11.23        -40.04        40.04 o
  -9   2  18        894.36        962.37        98.41 o
  -8   2  18         61.88         46.83        31.19 o
  -7   2  18        285.03        274.65        25.31 o
  -6   2  18        586.20        540.39        30.59 o
  -5   2  18       2119.44       1953.78        50.71 o
  -4   2  18        624.69        591.24        19.23 o
  -3   2  18        709.65        722.42        20.87 o
  -2   2  18       1532.24       1583.50        29.66 o
  -1   2  18        821.79        826.06        22.32 o
   0   2  18        424.25        502.76        18.62 o
   1   2  18        832.52        861.74        25.60 o
   2   2  18       1534.52       1532.03        33.55 o
   3   2  18        704.69        711.33        23.32 o
   4   2  18        634.51        539.04        26.86 o
   5   2  18       2127.02       1972.88        47.00 o
   6   2  18        587.54        564.61        30.69 o
   7   2  18        283.27        259.51        23.57 o
   8   2  18         61.86        110.72        33.55 o
   9   2  18        894.30        853.60       106.89 o
 -10   3  18         42.54         24.43        45.47 o
  -9   3  18        972.05        783.19        85.51 o
  -8   3  18        382.85        356.31        59.72 o
  -7   3  18        786.50        694.19        40.86 o
  -6   3  18        853.29        763.88        41.04 o
  -5   3  18        172.67        209.16        25.18 o
  -4   3  18       1548.36       1601.99        36.70 o
  -3   3  18        141.41        179.04        13.30 o
  -2   3  18       1907.69       1944.90        41.29 o
  -1   3  18       1163.14       1122.61        25.73 o
   0   3  18       1333.22       1322.53        30.11 o
   1   3  18       1163.04       1152.65        28.54 o
   2   3  18       1885.00       1866.20        38.97 o
   3   3  18        133.52        164.65        14.33 o
   4   3  18       1542.29       1583.02        40.97 o
   5   3  18        172.54        217.95        18.57 o
   6   3  18        852.11        794.22        46.53 o
   7   3  18        770.94        698.30        34.78 o
   8   3  18        381.07        421.84        47.00 o
   9   3  18        977.14        812.06        62.02 o
 -10   4  18        154.29        124.88        54.97 o
  -9   4  18        222.20        316.94        62.44 o
  -8   4  18         26.40         28.88        26.47 o
  -7   4  18        376.86        385.63        27.00 o
  -6   4  18         33.51         22.01        13.77 o
  -5   4  18       1859.62       1841.98        41.94 o
  -4   4  18        106.09         85.50        12.13 o
  -3   4  18       1155.23       1249.03        32.26 o
  -2   4  18       1920.31       1869.61        41.04 o
  -1   4  18        555.96        599.58        22.32 o
   0   4  18        138.76        146.89        13.90 o
   1   4  18        549.67        530.08        21.45 o
   2   4  18       1921.58       1834.15        40.14 o
   3   4  18       1151.04       1198.44        32.37 o
   4   4  18        106.59        118.63        20.01 o
   5   4  18       1869.82       1903.18        48.39 o
   6   4  18         32.79         18.13        15.52 o
   7   4  18        379.22        329.84        32.23 o
   8   4  18         27.30          9.68        27.20 o
   9   4  18        222.23        236.86        53.62 o
  -9   5  18        193.80        190.03        54.29 o
  -8   5  18        160.26        158.85        55.31 o
  -7   5  18        182.16        188.92        23.79 o
  -6   5  18        449.17        470.84        31.36 o
  -5   5  18         94.31         59.39        12.50 o
  -4   5  18        373.74        344.74        19.99 o
  -3   5  18        860.88        836.61        27.59 o
  -2   5  18       1490.78       1374.08        34.90 o
  -1   5  18       1092.26       1076.16        31.01 o
   0   5  18       1145.09       1106.08        32.50 o
   1   5  18       1094.66       1081.32        31.26 o
   2   5  18       1493.60       1413.49        63.51 o
   3   5  18        845.99        782.58        28.40 o
   4   5  18        373.09        315.88        22.09 o
   5   5  18         94.10         78.20        16.73 o
   6   5  18        456.39        492.68        30.09 o
   7   5  18        187.97        235.56        38.16 o
   8   5  18        158.97        177.34        37.00 o
  -9   6  18        102.29         19.68        43.44 o
  -8   6  18         27.02         15.04        24.29 o
  -7   6  18        424.86        416.45        26.08 o
  -6   6  18        226.91        193.92        20.07 o
  -5   6  18        332.24        343.11        28.34 o
  -4   6  18        689.14        651.83        46.13 o
  -3   6  18        592.94        651.05        30.31 o
  -2   6  18        785.57        747.11        30.01 o
  -1   6  18       3301.80       3492.85        91.18 o
   0   6  18        150.08        197.75        17.87 o
   1   6  18       3337.68       3439.57        64.33 o
   2   6  18        789.10        720.67        28.57 o
   3   6  18        599.04        626.42        35.11 o
   4   6  18        679.74        738.23        47.76 o
   5   6  18        334.98        336.26        24.36 o
   6   6  18        228.91        203.69        24.03 o
   7   6  18        422.44        488.03        59.04 o
   8   6  18         25.63         17.65        35.29 o
  -8   7  18        130.00        129.23        31.89 o
  -7   7  18        136.83        149.20        23.83 o
  -6   7  18        739.13        755.40        37.91 o
  -5   7  18        269.92        208.15        20.80 o
  -4   7  18       1395.65       1260.81        42.89 o
  -3   7  18        253.25        189.79        19.62 o
  -2   7  18        387.39        371.10        23.90 o
  -1   7  18        105.64        150.47        24.36 o
   0   7  18        154.47        216.88        21.49 o
   1   7  18        101.50         71.27        18.49 o
   2   7  18        395.08        354.23        22.62 o
   3   7  18        251.33        198.99        19.06 o
   4   7  18       1391.57       1286.85        38.42 o
   5   7  18        268.97        263.01        24.26 o
   6   7  18        740.00        811.88        58.21 o
   7   7  18        136.99        113.95        33.07 o
  -8   8  18         36.37         76.93        32.14 o
  -7   8  18        171.43        139.61        32.59 o
  -6   8  18        154.32         85.05        20.68 o
  -5   8  18        222.79        209.11        23.36 o
  -4   8  18       1330.17       1324.17        44.32 o
  -3   8  18         97.56         88.88        17.51 o
  -2   8  18       1363.80       1314.93        54.15 o
  -1   8  18        199.72        165.44        21.32 o
   0   8  18         31.78        -14.86        17.60 o
   1   8  18        195.85        186.94        24.24 o
   2   8  18       1363.96       1316.78        43.11 o
   3   8  18         96.17         77.46        17.79 o
   4   8  18       1340.10       1307.51        43.41 o
   5   8  18        217.64        230.92        33.39 o
   6   8  18        155.60         87.22        31.63 o
  -7   9  18        264.93        211.63        38.38 o
  -6   9  18       1128.15       1136.51        46.20 o
  -5   9  18        509.61        497.91        40.39 o
  -4   9  18        111.14         84.33        20.03 o
  -3   9  18        408.21        398.90        29.74 o
  -2   9  18       1355.08       1389.11        57.89 o
  -1   9  18        268.03        259.69        31.78 o
   0   9  18        535.04        541.39        43.84 o
   1   9  18        265.51        274.06        27.60 o
   2   9  18       1348.70       1271.88        50.48 o
   3   9  18        406.10        425.23        34.01 o
   4   9  18        112.14        140.78        27.62 o
   5   9  18        508.77        497.93        66.17 o
   6   9  18       1119.90        927.75       107.91 o
  -6  10  18         20.54        -25.36        42.81 o
  -5  10  18        208.24        144.14        40.73 o
  -4  10  18         28.31         33.31        21.93 o
  -3  10  18        215.13        201.15        23.08 o
  -2  10  18        139.30        134.37        30.63 o
  -1  10  18        183.86        168.90        45.09 o
   0  10  18        739.31        635.33        47.24 o
   1  10  18        190.50        177.61        26.29 o
   2  10  18        138.70        147.61        25.62 o
   3  10  18        212.57        189.40        28.56 o
   4  10  18         28.10         49.05        42.67 o
   5  10  18        214.04        245.00        67.87 o
  -4  11  18         53.97         63.55        20.73 o
  -3  11  18        501.44        478.83        34.67 o
  -2  11  18        244.12        286.21        38.48 o
  -1  11  18        182.72        185.95        35.99 o
   0  11  18        429.24        392.10        36.11 o
   1  11  18        186.59        247.21        44.45 o
   2  11  18        247.90        220.92        48.72 o
   3  11  18        493.50        396.35        74.65 o
   4  11  18         54.07         52.94        53.62 o
  -2  12  18         17.94         54.13        41.64 o
  -1  12  18        198.94        190.71        52.26 o
   0  12  18        206.35        169.67        56.33 o
   1  12  18        203.18         99.09        50.90 o
   1   0  19        145.84        121.32        10.34 o
   2   0  19       2385.31       2495.34        42.05 o
   3   0  19        363.04        301.98        14.14 o
   4   0  19        300.96        332.11        15.77 o
   5   0  19        175.29        220.62        20.32 o
   6   0  19          4.47         24.79        15.36 o
   7   0  19        275.03        265.44        27.13 o
   8   0  19         29.55         52.87        46.83 o
   9   0  19        303.05        366.37        46.96 o
  -9   1  19        434.15        483.70        65.83 o
  -8   1  19        674.00        669.51        55.03 o
  -7   1  19         27.04         38.53        16.85 o
  -6   1  19        238.11        210.47        21.94 o
  -5   1  19        283.80        271.08        17.14 o
  -4   1  19        166.16        137.52        13.25 o
  -3   1  19        120.77        148.57        12.71 o
  -2   1  19        539.64        515.31        21.98 o
  -1   1  19       2541.27       2387.57        40.19 o
   0   1  19        576.81        587.39        16.97 o
   1   1  19       2562.24       2398.43        43.46 o
   2   1  19        539.22        547.53        18.34 o
   3   1  19        121.75        169.66        13.39 o
   4   1  19        168.32        143.75        14.77 o
   5   1  19        273.29        299.77        19.72 o
   6   1  19        238.48        238.07        22.50 o
   7   1  19         26.65         15.78        16.17 o
   8   1  19        675.28        656.83        55.45 o
   9   1  19        427.14        452.77        50.34 o
  -9   2  19          6.90         22.03        30.92 o
  -8   2  19         21.79          5.46        28.75 o
  -7   2  19        463.44        457.11        31.15 o
  -6   2  19       1472.99       1345.83        37.26 o
  -5   2  19        447.26        430.85        20.96 o
  -4   2  19       1232.18       1233.27        28.88 o
  -3   2  19        391.73        323.44        15.59 o
  -2   2  19        188.45        165.06        10.93 o
  -1   2  19        126.39        125.51        11.08 o
   0   2  19        329.83        413.27        17.25 o
   1   2  19        131.28        120.23        11.86 o
   2   2  19        186.45        166.70        13.43 o
   3   2  19        384.61        304.92        17.15 o
   4   2  19       1235.26       1220.60        34.82 o
   5   2  19        450.27        416.72        22.97 o
   6   2  19       1471.56       1424.74        46.55 o
   7   2  19        470.49        606.30        76.87 o
   8   2  19         22.00         29.86        49.88 o
   9   2  19          7.43         14.95        32.60 o
  -9   3  19        136.71         98.41        50.90 o
  -8   3  19       1147.75       1153.07        98.41 o
  -7   3  19       1055.23       1048.58        36.10 o
  -6   3  19        922.91        884.81        36.73 o
  -5   3  19        241.72        210.73        19.40 o
  -4   3  19        169.27        161.50        13.03 o
  -3   3  19       1104.69       1024.32        28.30 o
  -2   3  19       3167.07       3304.03        62.31 o
  -1   3  19       1308.19       1422.55        30.35 o
   0   3  19        922.13        944.36        27.90 o
   1   3  19       1288.20       1343.36        31.73 o
   2   3  19       3168.53       3274.88        58.97 o
   3   3  19       1098.53       1039.34        29.56 o
   4   3  19        172.05        176.49        19.82 o
   5   3  19        249.74        222.60        19.61 o
   6   3  19        920.32        933.32        52.51 o
   7   3  19       1056.87       1105.35        43.66 o
   8   3  19       1152.81       1315.16        74.29 o
  -9   4  19        215.93        175.10        55.65 o
  -8   4  19        163.16        145.19        26.13 o
  -7   4  19        689.81        721.41        35.29 o
  -6   4  19         65.16         60.66        15.02 o
  -5   4  19        639.60        657.19        23.80 o
  -4   4  19        957.89        871.54        27.41 o
  -3   4  19        139.69        109.74        13.00 o
  -2   4  19         44.62         63.04        11.41 o
  -1   4  19       2623.09       2675.43        54.09 o
   0   4  19       1819.65       1767.86        41.49 o
   1   4  19       2601.57       2676.43        51.26 o
   2   4  19         44.75         73.47        15.58 o
   3   4  19        138.46         90.87        17.00 o
   4   4  19        958.36        844.16        32.04 o
   5   4  19        642.52        709.67        30.82 o
   6   4  19         65.51         93.31        18.58 o
   7   4  19        675.26        634.90        55.08 o
   8   4  19        163.98        149.82        34.98 o
  -9   5  19        250.94        327.80        61.08 o
  -8   5  19        662.44        593.24        42.68 o
  -7   5  19        352.21        344.61        28.20 o
  -6   5  19        344.88        335.02        17.85 o
  -5   5  19        180.76        191.33        16.27 o
  -4   5  19       2156.02       2041.60        46.72 o
  -3   5  19        699.96        701.71        26.00 o
  -2   5  19       1461.03       1295.15        34.03 o
  -1   5  19        189.58        210.76        16.37 o
   0   5  19        798.41        742.66        27.93 o
   1   5  19        189.23        206.94        16.72 o
   2   5  19       1457.73       1343.70        35.46 o
   3   5  19        700.01        650.43        27.15 o
   4   5  19       2150.65       2033.63        46.64 o
   5   5  19        173.16        149.63        19.09 o
   6   5  19        346.85        330.96        28.57 o
   7   5  19        351.91        340.83        44.14 o
   8   5  19        658.04        621.69        61.01 o
  -8   6  19         70.18         77.73        29.52 o
  -7   6  19       1072.68       1021.76        48.29 o
  -6   6  19         51.66         20.21        15.67 o
  -5   6  19          9.36         33.81        14.66 o
  -4   6  19        335.37        416.80        26.23 o
  -3   6  19        475.21        384.49        21.74 o
  -2   6  19         11.76         27.95        11.80 o
  -1   6  19        382.54        440.24        29.23 o
   0   6  19        745.58        751.71        30.18 o
   1   6  19        388.71        422.99        22.14 o
   2   6  19         10.68         17.02        13.97 o
   3   6  19        477.17        409.06        23.46 o
   4   6  19        335.48        387.02        23.14 o
   5   6  19          9.03         33.22        16.39 o
   6   6  19         53.28         77.18        29.35 o
   7   6  19       1090.50       1028.12        67.01 o
  -8   7  19         23.33         59.03        27.20 o
  -7   7  19        186.92        122.48        30.00 o
  -6   7  19        111.46        107.42        20.01 o
  -5   7  19       1576.49       1475.17        47.72 o
  -4   7  19        256.54        246.18        23.10 o
  -3   7  19        491.68        437.10        26.78 o
  -2   7  19         52.25         29.34        13.87 o
  -1   7  19        359.05        367.25        25.30 o
   0   7  19        729.43        794.93        36.75 o
   1   7  19        354.83        363.14        24.68 o
   2   7  19         53.02         38.85        15.33 o
   3   7  19        489.61        518.21        26.33 o
   4   7  19        255.31        233.41        20.63 o
   5   7  19       1561.26       1463.18        63.47 o
   6   7  19        111.24        115.78        33.07 o
   7   7  19        188.05        244.32        73.98 o
  -7   8  19        420.68        429.41        43.91 o
  -6   8  19         49.95        111.69        18.57 o
  -5   8  19        116.58        121.75        20.75 o
  -4   8  19         51.99         74.96        19.73 o
  -3   8  19        422.56        414.47        26.90 o
  -2   8  19        769.34        726.50        43.43 o
  -1   8  19       1122.57       1155.10        47.90 o
   0   8  19         51.35         56.44        19.10 o
   1   8  19       1124.06       1157.97        45.70 o
   2   8  19        768.69        701.46        33.15 o
   3   8  19        433.34        443.63        43.57 o
   4   8  19         50.92         65.37        20.62 o
   5   8  19        115.74        121.21        29.85 o
   6   8  19         48.93         77.33        37.47 o
  -6   9  19         50.15         65.23        20.71 o
  -5   9  19        110.75        123.16        21.31 o
  -4   9  19        470.18        481.23        40.26 o
  -3   9  19        302.74        331.44        27.93 o
  -2   9  19        121.67        121.77        29.35 o
  -1   9  19        768.77        809.44        40.39 o
   0   9  19       3155.50       3047.47        78.63 o
   1   9  19        755.43        746.29        39.92 o
   2   9  19        122.31        147.14        25.27 o
   3   9  19        304.51        315.72        36.44 o
   4   9  19        475.18        484.47        35.65 o
   5   9  19        107.45        138.73        43.53 o
  -5  10  19        205.33        212.23        26.10 o
  -4  10  19        120.48        100.21        21.48 o
  -3  10  19        333.45        306.99        27.80 o
  -2  10  19        110.55         98.18        29.68 o
  -1  10  19        544.02        519.17        37.23 o
   0  10  19        275.18        264.65        31.21 o
   1  10  19        536.04        538.00        36.80 o
   2  10  19        112.83         97.54        24.65 o
   3  10  19        338.38        345.60        40.48 o
   4  10  19        119.23        122.57        43.69 o
   5  10  19        204.95        136.41        63.80 o
  -4  11  19         45.24         84.86        38.74 o
  -3  11  19          5.92          4.25        29.00 o
  -2  11  19        150.33        168.31        54.97 o
  -1  11  19         29.26         94.14        31.15 o
   0  11  19         16.10         16.36        30.47 o
   1  11  19         27.08         12.57        29.92 o
   2  11  19        150.55        185.96        57.01 o
   3  11  19          5.92        -10.86        47.51 o
   0   0  20         28.77        191.77        22.06 o
   1   0  20         61.96        106.55        10.40 o
   2   0  20        477.80        496.30        17.82 o
   3   0  20        267.19        289.45        14.40 o
   4   0  20        617.88        603.58        19.57 o
   5   0  20        693.48        626.26        26.21 o
   6   0  20        397.78        289.84        24.00 o
   7   0  20         19.09          0.47        16.51 o
   8   0  20         53.24         68.17        31.80 o
  -9   1  20         62.40         13.57        57.01 o
  -8   1  20         70.37         43.70        30.67 o
  -7   1  20       1540.52       1499.34        52.45 o
  -6   1  20        748.20        655.70        33.80 o
  -5   1  20       1551.94       1521.87        51.62 o
  -4   1  20        307.50        355.27        15.32 o
  -3   1  20        243.66        276.62        13.96 o
  -2   1  20        167.97        177.09        11.61 o
  -1   1  20        544.30        551.14        18.01 o
   0   1  20        219.33        227.20        11.94 o
   1   1  20        543.98        542.73        18.37 o
   2   1  20        167.65        181.19        12.26 o
   3   1  20        250.39        267.48        16.10 o
   4   1  20        307.96        329.24        17.98 o
   5   1  20       1553.30       1482.53        50.94 o
   6   1  20        745.35        753.01        35.70 o
   7   1  20       1541.46       1526.65        64.08 o
   8   1  20         70.69         79.32        33.53 o
  -9   2  20        385.52        423.49        80.76 o
  -8   2  20        532.40        481.63        50.15 o
  -7   2  20        789.94        702.02        43.07 o
  -6   2  20       1082.17        989.84        39.86 o
  -5   2  20        475.97        509.36        34.58 o
  -4   2  20        224.18        282.77        15.85 o
  -3   2  20        289.78        289.91        15.34 o
  -2   2  20         23.04         26.86         9.37 o
  -1   2  20        142.98        149.69        11.26 o
   0   2  20       1356.53       1304.66        27.36 o
   1   2  20        136.05        152.19        12.98 o
   2   2  20         23.19         23.03        10.43 o
   3   2  20        295.14        283.86        17.02 o
   4   2  20        223.15        240.38        18.31 o
   5   2  20        484.71        535.37        33.88 o
   6   2  20       1079.70        972.47        39.53 o
   7   2  20        788.60        712.01        58.01 o
   8   2  20        536.63        503.64        53.16 o
  -9   3  20         31.23         -7.47        51.58 o
  -8   3  20        448.68        360.38        63.12 o
  -7   3  20        145.80        134.29        33.59 o
  -6   3  20        612.11        548.45        26.39 o
  -5   3  20        131.58        101.60        11.59 o
  -4   3  20       1116.25       1130.63        30.44 o
  -3   3  20       2865.75       2783.31        55.29 o
  -2   3  20        317.93        394.63        16.80 o
  -1   3  20        285.35        355.57        15.97 o
   0   3  20        532.64        607.44        23.91 o
   1   3  20        289.93        326.78        17.27 o
   2   3  20        317.02        347.84        18.55 o
   3   3  20       2874.16       2745.89        53.34 o
   4   3  20       1116.31       1131.06        32.40 o
   5   3  20        131.99         99.00        16.33 o
   6   3  20        610.47        541.97        30.71 o
   7   3  20        141.77        173.21        57.35 o
   8   3  20        447.65        402.42        54.97 o
  -8   4  20        603.98        434.35        68.55 o
  -7   4  20        569.81        631.25        33.02 o
  -6   4  20        176.03        192.96        19.24 o
  -5   4  20         33.41         48.75        11.17 o
  -4   4  20        941.14        941.28        41.94 o
  -3   4  20       1054.82       1119.35        31.23 o
  -2   4  20        457.18        405.39        19.84 o
  -1   4  20        282.14        246.01        16.68 o
   0   4  20          1.60          5.59        10.85 o
   1   4  20        283.18        249.41        16.68 o
   2   4  20        459.66        407.37        20.52 o
   3   4  20       1057.09       1111.43        35.30 o
   4   4  20        941.44        980.84        31.70 o
   5   4  20         35.71         47.99        16.24 o
   6   4  20        176.41        171.10        31.43 o
   7   4  20        570.53        616.28        54.78 o
   8   4  20        600.58        747.15        69.97 o
  -8   5  20        541.04        496.11        69.23 o
  -7   5  20        494.08        508.12        38.79 o
  -6   5  20        163.66        169.55        18.76 o
  -5   5  20        149.93        125.20        14.67 o
  -4   5  20        380.15        334.16        19.27 o
  -3   5  20       1019.17        982.73        30.68 o
  -2   5  20        584.77        575.94        24.07 o
  -1   5  20        664.25        648.23        26.32 o
   0   5  20          4.98         -0.17        11.54 o
   1   5  20        674.62        644.95        25.81 o
   2   5  20        584.29        623.61        26.35 o
   3   5  20        998.90       1003.01        34.25 o
   4   5  20        378.63        330.00        21.32 o
   5   5  20        149.25        126.94        18.61 o
   6   5  20        164.71        177.59        34.27 o
   7   5  20        501.25        555.03        68.55 o
  -8   6  20        111.60        107.91        49.54 o
  -7   6  20        174.51        160.18        59.38 o
  -6   6  20        231.95        220.09        18.34 o
  -5   6  20        157.12        183.77        18.84 o
  -4   6  20       1504.24       1441.31        43.48 o
  -3   6  20         70.40         47.24        13.34 o
  -2   6  20       3413.79       3432.80        67.96 o
  -1   6  20        973.42        938.44        31.94 o
   0   6  20         11.82         -4.59        13.63 o
   1   6  20        989.66        984.31        32.37 o
   2   6  20       3416.13       3410.69        65.61 o
   3   6  20         71.56         78.99        15.96 o
   4   6  20       1500.72       1460.73        40.53 o
   5   6  20        161.98        231.91        27.53 o
   6   6  20        232.34        237.80        59.04 o
   7   6  20        173.77        107.63        49.88 o
  -7   7  20        273.53        198.77        33.63 o
  -6   7  20         29.08         21.27        16.89 o
  -5   7  20          2.76        -14.79        14.79 o
  -4   7  20        774.94        793.64        37.62 o
  -3   7  20          3.02         -6.76        13.88 o
  -2   7  20        337.65        312.96        35.53 o
  -1   7  20         90.04        115.51        17.22 o
   0   7  20       3266.15       3485.19        72.96 o
   1   7  20         88.39        104.29        18.62 o
   2   7  20        339.81        271.09        21.25 o
   3   7  20          2.34         -4.93        15.07 o
   4   7  20        773.53        733.13        35.50 o
   5   7  20          2.86         12.71        22.81 o
   6   7  20         29.75         52.48        29.35 o
  -7   8  20        150.87        171.30        37.75 o
  -6   8  20        426.82        366.57        28.60 o
  -5   8  20        467.72        440.08        29.84 o
  -4   8  20         85.78        148.37        22.01 o
  -3   8  20        548.48        597.61        34.48 o
  -2   8  20        116.16         96.97        24.49 o
  -1   8  20        623.98        565.73        31.94 o
   0   8  20         58.98        177.98        32.23 o
   1   8  20        620.31        642.98        36.41 o
   2   8  20        114.79         71.14        19.69 o
   3   8  20        548.80        550.45        32.41 o
   4   8  20         85.76        167.09        25.24 o
   5   8  20        468.70        507.25        44.84 o
   6   8  20        429.64        337.98        79.41 o
  -6   9  20         15.31         10.21        50.90 o
  -5   9  20        225.42        179.55        23.99 o
  -4   9  20        101.03         98.97        23.12 o
  -3   9  20         98.04        123.17        20.87 o
  -2   9  20       1223.55       1175.51        61.65 o
  -1   9  20        149.08        155.01        27.84 o
   0   9  20         69.26         62.34        20.78 o
   1   9  20        144.68        164.49        24.66 o
   2   9  20       1220.75       1148.29        48.63 o
   3   9  20        101.29         86.69        24.30 o
   4   9  20        101.22        154.97        29.59 o
   5   9  20        226.53        168.82        83.82 o
  -5  10  20         66.78         76.53        34.73 o
  -4  10  20         26.13         38.26        35.13 o
  -3  10  20        111.68        102.36        34.84 o
  -2  10  20        322.61        303.66        40.11 o
  -1  10  20         58.29         46.32        26.96 o
   0  10  20        479.86        344.83        48.14 o
   1  10  20         58.16         22.79        29.09 o
   2  10  20        320.64        302.64        52.32 o
   3  10  20        109.63        101.93        41.78 o
   4  10  20         25.54         62.44        40.38 o
  -3  11  20        295.00        327.65        51.47 o
  -2  11  20        413.39        398.38        69.23 o
  -1  11  20        136.88        163.10        35.94 o
   0  11  20        541.31        496.30        86.19 o
   1  11  20        138.41        140.49        52.94 o
   2  11  20        413.53        471.00        74.65 o
   1   0  21        221.85        247.60        13.84 o
   2   0  21         93.99         68.17        13.32 o
   3   0  21         30.29          9.84         9.03 o
   4   0  21         88.59         96.34        11.17 o
   5   0  21        399.05        360.30        21.34 o
   6   0  21          2.13         16.02        19.10 o
   7   0  21        126.19         92.83        30.61 o
   8   0  21          5.72        -20.80        32.58 o
  -8   1  21        291.54        223.07        39.00 o
  -7   1  21        215.60        212.32        35.95 o
  -6   1  21        114.37        178.76        23.59 o
  -5   1  21        906.22        805.11        27.76 o
  -4   1  21        417.40        401.35        16.56 o
  -3   1  21        117.97        124.20        11.18 o
  -2   1  21        734.73        740.07        21.01 o
  -1   1  21       1652.04       1675.15        35.51 o
   0   1  21        217.05        233.36        12.52 o
   1   1  21       1664.19       1628.65        32.35 o
   2   1  21        736.03        723.35        21.73 o
   3   1  21        119.20        129.93        13.33 o
   4   1  21        418.76        381.00        19.94 o
   5   1  21        899.07        817.24        30.63 o
   6   1  21        113.76        130.60        16.63 o
   7   1  21        215.38        206.33        37.88 o
   8   1  21        293.60        310.83        62.78 o
  -8   2  21        329.36        266.25        41.26 o
  -7   2  21         16.54         20.10        28.75 o
  -6   2  21        220.21        276.53        18.17 o
  -5   2  21        537.43        572.82        29.34 o
  -4   2  21       2008.32       1914.12        39.49 o
  -3   2  21        897.37        908.47        23.06 o
  -2   2  21        489.64        485.53        19.06 o
  -1   2  21        809.12        746.06        22.45 o
   0   2  21       3318.41       3412.06        59.06 o
   1   2  21        801.92        753.54        24.36 o
   2   2  21        491.24        481.59        20.91 o
   3   2  21        905.06        945.49        28.36 o
   4   2  21       2014.56       1903.43        42.12 o
   5   2  21        537.31        514.43        26.15 o
   6   2  21        221.64        258.27        20.94 o
   7   2  21         18.43         12.03        27.57 o
   8   2  21        329.19        292.93        45.78 o
  -8   3  21        505.90        529.37        72.62 o
  -7   3  21        598.67        559.47        32.24 o
  -6   3  21        103.30         78.38        14.71 o
  -5   3  21        652.51        652.45        23.05 o
  -4   3  21       1148.46       1130.76        30.98 o
  -3   3  21        104.88        106.56        12.55 o
  -2   3  21        892.38        953.07        25.09 o
  -1   3  21       1071.04       1135.66        27.82 o
   0   3  21        293.22        281.03        17.78 o
   1   3  21       1057.74       1031.99        28.90 o
   2   3  21        891.57        844.53        27.36 o
   3   3  21        106.18        101.90        14.48 o
   4   3  21       1148.57       1087.48        32.46 o
   5   3  21        654.85        741.66        34.55 o
   6   3  21        102.56         45.94        16.01 o
   7   3  21        597.99        577.33        53.52 o
   8   3  21        507.86        669.18       119.45 o
  -8   4  21        391.91        272.83        62.44 o
  -7   4  21        157.51         95.44        31.56 o
  -6   4  21         32.33         20.27        14.69 o
  -5   4  21        527.40        525.04        23.17 o
  -4   4  21       2009.67       1898.48        43.56 o
  -3   4  21        963.94        952.34        29.27 o
  -2   4  21       1020.54        980.88        26.14 o
  -1   4  21         11.57         22.01        10.05 o
   0   4  21        443.26        427.93        21.80 o
   1   4  21         10.14          9.48        11.34 o
   2   4  21       1024.63        970.69        30.41 o
   3   4  21        981.35        931.84        30.86 o
   4   4  21       2015.93       1874.28        44.30 o
   5   4  21        530.84        541.69        29.74 o
   6   4  21         32.91         52.73        25.55 o
   7   4  21        150.55        118.92        32.74 o
  -7   5  21         63.17         34.50        19.70 o
  -6   5  21        109.32        103.60        16.92 o
  -5   5  21        469.76        566.40        25.13 o
  -4   5  21        105.81        116.97        20.63 o
  -3   5  21        643.47        648.49        25.92 o
  -2   5  21       1384.97       1513.22        63.91 o
  -1   5  21       2100.11       2218.67        49.74 o
   0   5  21       1659.97       1799.88        48.73 o
   1   5  21       2110.12       2272.09        48.14 o
   2   5  21       1380.67       1494.30        38.53 o
   3   5  21        648.09        690.46        28.72 o
   4   5  21        106.50         83.90        17.96 o
   5   5  21        473.83        469.22        39.21 o
   6   5  21        107.71        159.45        28.34 o
   7   5  21         62.77         51.78        32.58 o
  -7   6  21        698.83        680.49        46.79 o
  -6   6  21        308.62        307.98        19.81 o
  -5   6  21         22.28         48.70        15.12 o
  -4   6  21       1013.18       1087.41        42.26 o
  -3   6  21        230.75        231.28        18.78 o
  -2   6  21         96.80         81.41        17.70 o
  -1   6  21        491.14        501.72        24.97 o
   0   6  21        560.08        524.04        27.95 o
   1   6  21        499.34        534.40        25.08 o
   2   6  21         97.22         75.91        15.95 o
   3   6  21        223.64        215.13        19.53 o
   4   6  21       1016.67       1118.47        37.29 o
   5   6  21         21.90          8.17        22.14 o
   6   6  21        309.07        381.49        45.22 o
  -7   7  21          7.35        -29.18        29.18 o
  -6   7  21        197.08        156.60        22.17 o
  -5   7  21        319.58        342.14        23.49 o
  -4   7  21         10.55         -4.75        14.09 o
  -3   7  21        228.40        204.60        18.77 o
  -2   7  21       1195.44       1238.92        43.84 o
  -1   7  21        338.43        391.11        24.13 o
   0   7  21        804.70        980.81        44.10 o
   1   7  21        332.32        398.72        25.75 o
   2   7  21       1194.13       1299.83        38.97 o
   3   7  21        225.01        202.30        23.09 o
   4   7  21         10.27         -2.78        18.18 o
   5   7  21        312.22        325.94        44.08 o
   6   7  21        195.93        241.61        63.80 o
  -6   8  21        270.68        223.62        33.82 o
  -5   8  21        221.44        248.10        25.55 o
  -4   8  21          0.23         15.71        18.01 o
  -3   8  21       1339.00       1368.16        48.81 o
  -2   8  21        156.71        171.73        43.52 o
  -1   8  21       2447.81       2311.17        63.21 o
   0   8  21        400.93        407.92        26.22 o
   1   8  21       2443.36       2300.75        58.48 o
   2   8  21        156.48        153.28        22.05 o
   3   8  21       1347.82       1301.25        46.91 o
   4   8  21          0.34         11.55        23.31 o
   5   8  21        223.24        259.59        38.00 o
  -5   9  21         19.17         -1.98        22.38 o
  -4   9  21        586.86        631.22        42.80 o
  -3   9  21         32.58         32.83        17.96 o
  -2   9  21         60.72         63.98        26.76 o
  -1   9  21        323.24        298.77        30.19 o
   0   9  21         65.97         64.75        21.29 o
   1   9  21        326.22        358.97        30.62 o
   2   9  21         60.78         21.23        22.50 o
   3   9  21         32.88         46.23        26.44 o
   4   9  21        586.08        502.26        60.26 o
   5   9  21         17.24         -4.57        36.91 o
  -4  10  21         43.26         41.82        22.39 o
  -3  10  21        125.21        142.73        26.37 o
  -2  10  21        128.75        176.46        52.26 o
  -1  10  21         84.64         95.04        31.09 o
   0  10  21         23.64         -3.62        28.05 o
   1  10  21         82.11         58.41        46.49 o
   2  10  21        128.28         93.66        50.22 o
   3  10  21        122.94        125.30        43.53 o
   4  10  21         44.25        152.70        72.62 o
  -1  11  21        114.24        122.16        49.54 o
   0   0  22       2950.33       3159.62        68.73 o
   1   0  22        186.83        163.83        13.48 o
   2   0  22         50.51         48.46        10.25 o
   3   0  22        114.32         87.05        11.32 o
   4   0  22         65.77         85.61        11.29 o
   5   0  22        995.26        929.77        28.58 o
   6   0  22        320.04        238.46        24.70 o
   7   0  22        374.43        318.85        43.16 o
  -7   1  22       1048.09       1038.74       104.52 o
  -6   1  22        994.98        963.73        41.53 o
  -5   1  22        158.68        147.62        13.85 o
  -4   1  22        247.06        267.49        14.56 o
  -3   1  22        760.72        750.18        21.87 o
  -2   1  22        145.56        163.89        12.17 o
  -1   1  22         91.95         92.27        10.96 o
   0   1  22        188.81        174.87        13.82 o
   1   1  22         88.22        104.33        13.64 o
   2   1  22        144.88        165.68        12.89 o
   3   1  22        751.20        750.89        26.05 o
   4   1  22        243.82        270.90        17.53 o
   5   1  22        156.73        149.70        17.56 o
   6   1  22        998.26       1019.69        35.73 o
   7   1  22       1051.88       1138.21        69.46 o
  -7   2  22         81.58         49.01        31.30 o
  -6   2  22        521.32        500.93        25.61 o
  -5   2  22       3096.92       3082.39        56.80 o
  -4   2  22        573.04        550.03        21.37 o
  -3   2  22        352.27        360.86        15.85 o
  -2   2  22         86.57         92.65        11.26 o
  -1   2  22        144.97        186.74        13.50 o
   0   2  22        152.26        175.59        15.17 o
   1   2  22        140.14        159.32        13.95 o
   2   2  22         87.96        110.92        20.23 o
   3   2  22        358.29        386.16        25.34 o
   4   2  22        568.31        588.80        24.83 o
   5   2  22       3111.51       3150.92        67.29 o
   6   2  22        524.02        516.82        52.71 o
   7   2  22         81.43         83.12        33.29 o
  -7   3  22        231.21        163.56        48.86 o
  -6   3  22          9.21         20.43        18.86 o
  -5   3  22        378.74        351.13        21.56 o
  -4   3  22        572.52        629.46        23.61 o
  -3   3  22        357.41        349.99        18.72 o
  -2   3  22        464.40        476.53        22.83 o
  -1   3  22       1402.98       1300.54        30.65 o
   0   3  22        342.09        381.94        20.31 o
   1   3  22       1399.48       1343.50        33.77 o
   2   3  22        461.43        482.85        22.49 o
   3   3  22        349.09        342.20        20.47 o
   4   3  22        574.97        612.13        26.38 o
   5   3  22        381.91        391.54        25.06 o
   6   3  22          9.06         13.92        21.60 o
   7   3  22        233.94        253.17        69.56 o
  -7   4  22         11.06        -17.39        78.73 o
  -6   4  22        685.81        610.67        32.58 o
  -5   4  22         66.68         50.49        11.72 o
  -4   4  22        252.84        265.74        17.74 o
  -3   4  22       1115.71       1116.42        32.16 o
  -2   4  22        776.05        777.17        24.09 o
  -1   4  22        384.88        379.13        20.23 o
   0   4  22       1107.07       1025.62        32.57 o
   1   4  22        384.99        398.25        20.56 o
   2   4  22        781.79        825.39        28.79 o
   3   4  22       1112.46       1107.85        33.65 o
   4   4  22        255.49        274.33        20.06 o
   5   4  22         62.89         54.76        16.00 o
   6   4  22        679.26        586.21        57.87 o
   7   4  22         11.25         43.14        32.43 o
  -7   5  22        695.65        676.55        59.18 o
  -6   5  22        222.82        206.41        21.45 o
  -5   5  22        210.72        201.42        17.46 o
  -4   5  22        175.80        144.52        15.81 o
  -3   5  22       3007.75       2991.57        61.55 o
  -2   5  22        248.64        247.71        17.78 o
  -1   5  22        499.83        462.89        22.86 o
   0   5  22        159.87        172.03        17.26 o
   1   5  22        500.45        441.45        22.28 o
   2   5  22        247.92        217.98        18.65 o
   3   5  22       2995.74       2922.59        59.32 o
   4   5  22        173.77        162.62        18.17 o
   5   5  22        208.98        212.55        25.63 o
   6   5  22        221.62        223.13        32.05 o
  -6   6  22       1443.61       1439.60        53.49 o
  -5   6  22         88.47        125.42        17.16 o
  -4   6  22        371.70        398.58        24.10 o
  -3   6  22         41.41         66.35        16.27 o
  -2   6  22        507.42        478.45        23.84 o
  -1   6  22        176.60        170.59        17.53 o
   0   6  22          3.89          9.10        14.11 o
   1   6  22        179.84        172.53        19.66 o
   2   6  22        509.54        457.34        24.77 o
   3   6  22         39.91         44.45        16.09 o
   4   6  22        370.51        424.56        28.15 o
   5   6  22         86.89        112.34        22.82 o
   6   6  22       1452.52       1481.91        71.03 o
  -6   7  22        684.58        725.84        49.10 o
  -5   7  22          4.89         34.26        16.94 o
  -4   7  22        665.25        628.78        30.68 o
  -3   7  22        443.13        442.87        32.61 o
  -2   7  22         54.07         29.06        17.46 o
  -1   7  22        128.48        127.48        17.70 o
   0   7  22         99.40         73.51        17.15 o
   1   7  22        128.38        121.01        21.77 o
   2   7  22         55.36         85.84        18.82 o
   3   7  22        440.44        473.08        29.98 o
   4   7  22        661.00        638.13        39.03 o
   5   7  22          4.78          3.36        20.62 o
  -6   8  22        276.77        289.80        52.26 o
  -5   8  22        362.94        377.46        32.34 o
  -4   8  22         10.08         -1.54        26.44 o
  -3   8  22         81.05         79.22        23.16 o
  -2   8  22        108.62        123.44        23.61 o
  -1   8  22        233.69        258.11        22.32 o
   0   8  22        680.59        550.01        30.03 o
   1   8  22        233.23        261.93        23.83 o
   2   8  22        108.60         86.65        24.77 o
   3   8  22         83.29         95.55        23.46 o
   4   8  22          9.84         24.97        22.77 o
   5   8  22        364.23        400.40        83.48 o
  -5   9  22        301.60        322.37        59.72 o
  -4   9  22        188.42        124.65        32.24 o
  -3   9  22        139.67        122.92        24.72 o
  -2   9  22        105.61        149.99        46.15 o
  -1   9  22        160.87        185.47        32.62 o
   0   9  22        147.34        158.23        27.28 o
   1   9  22        163.00        110.97        24.59 o
   2   9  22        107.55        122.49        29.26 o
   3   9  22        144.13        152.22        42.71 o
   4   9  22        190.36        193.45        47.09 o
  -3  10  22         43.98         69.90        43.44 o
  -2  10  22         64.88         53.62        42.08 o
  -1  10  22         15.54        -25.90        25.90 o
   0  10  22          1.58          3.28        39.02 o
   1  10  22         14.91        -17.05        27.72 o
   2  10  22         63.57         25.79        45.47 o
   1   0  23        340.92        320.92        16.14 o
   2   0  23        279.91        352.04        16.74 o
   3   0  23          0.01         -9.53         9.53 o
   4   0  23        502.64        543.23        20.24 o
   5   0  23         13.87          1.00        11.81 o
   6   0  23        129.30        225.07        29.89 o
   7   0  23        104.39        182.38        36.91 o
  -7   1  23        319.01        286.01        40.93 o
  -6   1  23        675.65        712.39        71.40 o
  -5   1  23        227.90        247.31        14.62 o
  -4   1  23        699.23        737.07        22.57 o
  -3   1  23       2396.71       2484.86        44.28 o
  -2   1  23        901.79        990.50        25.31 o
  -1   1  23        943.11        947.42        25.23 o
   0   1  23        216.43        211.19        14.04 o
   1   1  23        943.76        940.17        25.62 o
   2   1  23        896.40        959.68        25.89 o
   3   1  23       2408.23       2431.79        48.80 o
   4   1  23        705.98        734.42        26.85 o
   5   1  23        220.55        242.22        18.08 o
   6   1  23        668.42        685.82        58.63 o
   7   1  23        318.74        303.53        57.35 o
  -7   2  23        521.78        475.53        61.76 o
  -6   2  23        313.02        281.85        20.61 o
  -5   2  23       1001.88        976.57        34.85 o
  -4   2  23        306.43        325.90        17.48 o
  -3   2  23       1034.42       1036.68        29.90 o
  -2   2  23         73.75         76.64        14.21 o
  -1   2  23       1869.28       1830.40        38.23 o
   0   2  23       1607.92       1664.03        36.42 o
   1   2  23       1858.42       1817.39        39.94 o
   2   2  23         75.17        104.38        13.96 o
   3   2  23       1036.00       1024.47        30.85 o
   4   2  23        309.71        300.66        24.58 o
   5   2  23        998.40       1019.63        45.26 o
   6   2  23        314.82        333.78        32.82 o
   7   2  23        519.66        673.01       129.29 o
  -6   3  23        284.53        293.63        23.42 o
  -5   3  23        279.32        309.90        23.93 o
  -4   3  23        186.29        188.89        15.25 o
  -3   3  23         32.57         31.61        11.82 o
  -2   3  23        236.82        214.87        14.43 o
  -1   3  23         38.32         25.39        10.66 o
   0   3  23        218.96        202.96        17.32 o
   1   3  23         39.20         31.22        12.14 o
   2   3  23        238.15        186.55        16.65 o
   3   3  23         31.71         12.57        12.91 o
   4   3  23        182.45        148.96        16.94 o
   5   3  23        277.93        305.02        31.87 o
   6   3  23        289.71        282.01        47.91 o
  -6   4  23        201.85        236.96        33.94 o
  -5   4  23        150.46        152.65        20.96 o
  -4   4  23       1328.07       1316.26        35.37 o
  -3   4  23        281.56        287.76        25.86 o
  -2   4  23       1452.17       1518.61        34.31 o
  -1   4  23        314.19        308.97        19.56 o
   0   4  23          3.14          7.45        12.21 o
   1   4  23        319.26        351.70        20.10 o
   2   4  23       1456.57       1482.42        37.99 o
   3   4  23        285.54        263.82        20.06 o
   4   4  23       1319.34       1332.78        38.21 o
   5   4  23        151.88        150.75        23.79 o
   6   4  23        201.24        208.58        30.51 o
  -6   5  23         95.30         71.41        19.33 o
  -5   5  23        370.55        441.91        23.96 o
  -4   5  23        121.21        102.17        16.00 o
  -3   5  23        867.05        881.17        30.27 o
  -2   5  23        116.79        126.30        17.72 o
  -1   5  23        583.97        605.93        26.99 o
   0   5  23          0.86         -4.81        13.21 o
   1   5  23        583.31        614.76        26.44 o
   2   5  23        117.71        102.11        16.03 o
   3   5  23        864.24        875.10        32.11 o
   4   5  23        120.87         90.70        19.46 o
   5   5  23        368.51        427.92        32.31 o
   6   5  23         93.10         67.71        27.62 o
  -6   6  23        121.98         82.13        23.66 o
  -5   6  23        108.06         93.48        23.95 o
  -4   6  23        460.06        412.12        24.02 o
  -3   6  23        183.20        159.42        17.00 o
  -2   6  23        369.10        445.14        42.71 o
  -1   6  23         38.12         42.15        14.53 o
   0   6  23        201.95        183.84        19.22 o
   1   6  23         36.62         30.57        15.49 o
   2   6  23        363.31        368.87        23.23 o
   3   6  23        185.12        201.87        22.30 o
   4   6  23        462.51        404.68        31.75 o
   5   6  23        109.78         85.03        23.67 o
   6   6  23        121.41        117.41        56.33 o
  -6   7  23         40.87         73.30        35.97 o
  -5   7  23        507.71        563.15        34.07 o
  -4   7  23        301.32        277.68        22.91 o
  -3   7  23        266.85        235.35        22.14 o
  -2   7  23          3.02         -5.69        15.81 o
  -1   7  23        409.61        390.48        24.81 o
   0   7  23        470.18        494.51        27.58 o
   1   7  23        405.08        354.36        34.40 o
   2   7  23          3.27         -1.02        25.21 o
   3   7  23        264.76        237.30        24.96 o
   4   7  23        304.97        295.32        30.01 o
   5   7  23        511.01        478.69        50.44 o
   6   7  23         39.73          5.43        59.04 o
  -5   8  23         28.23         44.64        23.77 o
  -4   8  23         93.81        106.00        20.49 o
  -3   8  23        497.42        495.69        31.16 o
  -2   8  23         99.68        101.46        25.60 o
  -1   8  23         80.63         43.28        18.23 o
   0   8  23        249.62        275.42        23.91 o
   1   8  23         77.66         94.57        20.95 o
   2   8  23        101.39        103.90        20.82 o
   3   8  23        494.47        514.21        43.60 o
   4   8  23         95.56        117.78        40.38 o
   5   8  23         27.95         91.62        65.83 o
  -4   9  23         98.97        190.03        50.22 o
  -3   9  23        472.51        515.80        67.87 o
  -2   9  23        108.15         84.55        29.51 o
  -1   9  23        290.15        339.85        35.63 o
   0   9  23         78.39        112.12        26.20 o
   1   9  23        289.52        327.81        36.60 o
   2   9  23        109.00        129.09        30.43 o
   3   9  23        471.84        570.45        63.10 o
   4   9  23         97.80         65.15        68.55 o
  -1  10  23         94.54        127.59        50.22 o
   0  10  23         19.44         30.54        39.36 o
   0   0  24       2577.81       2904.28        77.09 o
   1   0  24        105.60         88.58        12.01 o
   2   0  24        383.78        409.58        17.96 o
   3   0  24        411.43        351.78        17.21 o
   4   0  24       1507.66       1655.40        34.93 o
   5   0  24         69.13         40.90        14.77 o
   6   0  24        771.58        881.26        61.19 o
  -6   1  24        317.54        354.11        43.89 o
  -5   1  24        484.89        474.32        22.75 o
  -4   1  24         29.42         27.68        12.60 o
  -3   1  24        211.90        197.66        19.58 o
  -2   1  24        369.47        353.44        16.80 o
  -1   1  24        527.03        541.39        20.79 o
   0   1  24       1239.14       1181.17        31.26 o
   1   1  24        524.71        501.84        19.94 o
   2   1  24        372.01        330.03        17.10 o
   3   1  24        207.31        198.03        18.56 o
   4   1  24         29.12         43.84        13.94 o
   5   1  24        488.31        460.20        23.79 o
   6   1  24        320.40        466.70        48.18 o
  -6   2  24         49.12         66.20        30.32 o
  -5   2  24       2096.66       2138.38        48.47 o
  -4   2  24        583.52        535.72        20.50 o
  -3   2  24        133.66        172.60        13.33 o
  -2   2  24        678.44        689.69        22.23 o
  -1   2  24       1456.65       1513.64        34.51 o
   0   2  24        195.51        262.75        18.32 o
   1   2  24       1448.11       1432.10        35.23 o
   2   2  24        676.59        685.77        26.25 o
   3   2  24        136.27        168.70        19.02 o
   4   2  24        577.28        523.34        24.15 o
   5   2  24       2091.47       2114.48        59.67 o
   6   2  24         47.32         67.17        24.55 o
  -6   3  24         86.91         99.72        22.40 o
  -5   3  24        208.59        240.20        17.84 o
  -4   3  24        790.71        794.24        35.72 o
  -3   3  24       1432.53       1308.98        33.23 o
  -2   3  24        467.85        532.13        21.63 o
  -1   3  24        582.66        582.79        22.30 o
   0   3  24        132.04        144.84        16.10 o
   1   3  24        578.85        589.43        24.70 o
   2   3  24        470.72        491.84        23.53 o
   3   3  24       1436.65       1347.15        36.73 o
   4   3  24        798.99        750.93        29.81 o
   5   3  24        207.14        247.38        26.74 o
   6   3  24         84.41         81.99        25.11 o
  -6   4  24         27.69         40.72        22.40 o
  -5   4  24         11.04         -6.53        11.15 o
  -4   4  24        911.87        982.47        33.05 o
  -3   4  24        179.50        177.09        16.15 o
  -2   4  24        877.54        860.32        28.86 o
  -1   4  24        349.94        388.81        21.52 o
   0   4  24        195.89        161.13        17.50 o
   1   4  24        348.25        404.45        21.55 o
   2   4  24        873.89        971.35        32.15 o
   3   4  24        177.24        199.29        19.27 o
   4   4  24        917.35        995.20        38.98 o
   5   4  24         10.11         20.97        20.03 o
   6   4  24         27.11        -27.60        27.60 o
  -6   5  24        113.90        133.02        30.54 o
  -5   5  24          9.81          2.19        18.08 o
  -4   5  24        113.22         87.90        14.98 o
  -3   5  24        752.22        813.54        29.44 o
  -2   5  24         98.03         90.10        12.99 o
  -1   5  24         87.77         64.50        14.83 o
   0   5  24          1.46        -12.32        12.32 o
   1   5  24         90.04         74.79        14.76 o
   2   5  24         94.96         89.04        25.48 o
   3   5  24        747.78        817.42        35.53 o
   4   5  24        115.04         67.06        28.31 o
   5   5  24          9.46          7.70        21.35 o
   6   5  24        111.77        192.07        60.40 o
  -6   6  24        901.59        937.93        68.55 o
  -5   6  24         66.04         75.33        22.79 o
  -4   6  24        144.12        163.38        18.74 o
  -3   6  24        188.11        213.16        19.59 o
  -2   6  24         74.63         65.93        18.35 o
  -1   6  24       1287.43       1243.05        52.57 o
   0   6  24          1.99          4.00        14.47 o
   1   6  24       1295.71       1244.66        40.18 o
   2   6  24         75.07         55.59        17.33 o
   3   6  24        185.41        186.08        21.75 o
   4   6  24        148.23        178.28        25.99 o
   5   6  24         64.35         46.76        28.17 o
   6   6  24        900.94        886.70        67.62 o
  -5   7  24         27.61          4.14        19.91 o
  -4   7  24         59.33         51.54        17.26 o
  -3   7  24        149.73        147.45        20.33 o
  -2   7  24         20.59         18.91        17.87 o
  -1   7  24         48.30        130.60        45.08 o
   0   7  24        299.56        376.38        24.88 o
   1   7  24         47.74         27.63        17.11 o
   2   7  24         22.38         28.51        17.36 o
   3   7  24        152.39        171.59        25.45 o
   4   7  24         58.41         84.16        26.81 o
   5   7  24         27.90         11.54        56.33 o
  -4   8  24        260.69        273.92        26.24 o
  -3   8  24        179.17        148.27        21.30 o
  -2   8  24        164.23        164.19        48.19 o
  -1   8  24         98.73        105.33        23.44 o
   0   8  24       1088.47       1217.73        51.08 o
   1   8  24         99.83        133.66        33.70 o
   2   8  24        162.57        178.29        31.38 o
   3   8  24        181.12        170.68        62.78 o
   4   8  24        260.49        386.48        54.43 o
  -2   9  24         60.42         82.82        28.98 o
  -1   9  24         14.30         41.36        22.74 o
   0   9  24        583.09        504.27        39.16 o
   1   9  24         14.00         -1.86        27.70 o
   2   9  24         62.47        109.21        43.78 o
   1   0  25          4.87         10.07        10.57 o
   2   0  25         30.08         31.67        10.93 o
   3   0  25        207.10        220.41        15.27 o
   4   0  25         21.85         37.22        11.62 o
   5   0  25        150.16        154.30        17.14 o
   6   0  25          3.79         12.38        22.77 o
  -6   1  25        338.01        327.12        61.76 o
  -5   1  25        214.06        182.35        15.23 o
  -4   1  25        259.33        295.05        16.49 o
  -3   1  25        619.22        659.21        22.30 o
  -2   1  25         73.94        101.10        12.34 o
  -1   1  25        488.93        468.98        19.60 o
   0   1  25         81.54        147.31        14.73 o
   1   1  25        484.92        465.78        19.85 o
   2   1  25         73.64         93.39        14.12 o
   3   1  25        622.06        680.93        26.51 o
   4   1  25        257.49        300.13        19.66 o
   5   1  25        211.01        221.91        26.84 o
   6   1  25        332.93        372.74        82.58 o
  -6   2  25         14.24         27.83        47.51 o
  -5   2  25        523.96        574.11        24.59 o
  -4   2  25        138.26        140.57        14.42 o
  -3   2  25        133.34        126.52        15.58 o
  -2   2  25        751.41        655.79        24.01 o
  -1   2  25        973.19        976.97        28.52 o
   0   2  25        442.35        475.52        29.75 o
   1   2  25        973.20        973.93        29.87 o
   2   2  25        760.93        653.51        26.31 o
   3   2  25        135.35        134.67        15.80 o
   4   2  25        138.50        160.24        18.68 o
   5   2  25        522.01        522.94        31.53 o
   6   2  25         14.52         16.63        74.65 o
  -5   3  25        363.86        456.78        25.24 o
  -4   3  25        337.85        343.78        21.43 o
  -3   3  25       1645.73       1532.95        35.09 o
  -2   3  25         91.24        172.25        18.92 o
  -1   3  25       1192.13       1022.94        29.14 o
   0   3  25        659.37        694.63        28.70 o
   1   3  25       1197.85       1057.92        31.88 o
   2   3  25         90.06        130.36        22.76 o
   3   3  25       1642.51       1528.67        48.71 o
   4   3  25        330.85        320.18        24.12 o
   5   3  25        363.63        363.64        35.36 o
   6   3  25        226.65        274.86        48.86 o
  -5   4  25        321.27        352.59        41.06 o
  -4   4  25        191.71        194.07        20.18 o
  -3   4  25        427.29        396.51        18.76 o
  -2   4  25       2305.83       2462.91        48.32 o
  -1   4  25        443.59        485.51        24.76 o
   0   4  25        403.21        393.02        22.96 o
   1   4  25        445.67        479.61        23.61 o
   2   4  25       2306.85       2443.39        52.08 o
   3   4  25        423.19        446.29        24.55 o
   4   4  25        189.45        211.11        25.16 o
   5   4  25        322.00        393.12        57.70 o
   6   4  25        218.17        218.53        48.86 o
  -5   5  25         93.72        151.18        44.11 o
  -4   5  25         52.32         33.68        14.44 o
  -3   5  25         94.15         76.66        15.01 o
  -2   5  25        153.01        180.14        17.95 o
  -1   5  25         29.62         28.27        13.92 o
   0   5  25        419.80        359.91        22.96 o
   1   5  25         29.01         37.27        15.53 o
   2   5  25        153.53        149.56        18.68 o
   3   5  25         92.71         87.71        18.57 o
   4   5  25         53.53         47.48        21.05 o
   5   5  25         95.81         95.74        36.78 o
   6   5  25        443.82        541.58        67.19 o
  -5   6  25        203.02        260.96        29.99 o
  -4   6  25        327.11        375.73        53.37 o
  -3   6  25         68.59         78.03        17.77 o
  -2   6  25        210.52        288.75        27.55 o
  -1   6  25        100.97        111.40        21.05 o
   0   6  25        156.06        178.02        19.37 o
   1   6  25        100.77        104.41        18.04 o
   2   6  25        211.88        309.93        24.62 o
   3   6  25         67.71        102.61        22.15 o
   4   6  25        327.10        372.16        31.97 o
   5   6  25        203.18        254.65        38.15 o
  -4   7  25         30.22         15.96        16.01 o
  -3   7  25         90.21        112.65        19.15 o
  -2   7  25        195.20        222.66        31.66 o
  -1   7  25        247.41        241.05        40.18 o
   0   7  25        687.36        702.57        37.19 o
   1   7  25        246.45        272.18        26.58 o
   2   7  25        195.01        179.30        26.13 o
   3   7  25         90.14        114.87        28.44 o
   4   7  25         28.34         43.70        66.51 o
  -3   8  25         38.24         57.01        34.61 o
  -2   8  25         19.32         76.35        49.88 o
  -1   8  25        113.08        127.10        38.12 o
   0   8  25         20.25         49.70        21.79 o
   1   8  25        113.74         66.55        22.65 o
   2   8  25         19.71         67.44        25.82 o
   3   8  25         37.80         23.76        37.67 o
   0   0  26       5741.73       6078.12       140.89 o
   1   0  26          2.23          7.06        12.71 o
   2   0  26        382.21        417.53        22.39 o
   3   0  26        479.94        464.18        19.88 o
   4   0  26        603.71        691.34        41.44 o
   5   0  26        443.76        459.79        31.07 o
   6   0  26        576.21        736.37        68.55 o
  -6   1  26        214.36        229.39        42.76 o
  -5   1  26         88.28         85.16        16.29 o
  -4   1  26         56.95         25.43        12.09 o
  -3   1  26        465.20        553.67        21.37 o
  -2   1  26          2.68         19.13        10.69 o
  -1   1  26        255.58        206.99        15.23 o
   0   1  26        552.87        473.24        22.41 o
   1   1  26        257.66        211.40        19.57 o
   2   1  26          3.18         13.23        12.34 o
   3   1  26        466.01        561.36        24.74 o
   4   1  26         58.24         36.06        15.67 o
   5   1  26         88.71         54.17        20.51 o
   6   1  26        210.21        278.94        46.15 o
  -5   2  26        181.67        162.52        26.32 o
  -4   2  26        395.06        493.73        21.22 o
  -3   2  26         51.26         65.83        11.57 o
  -2   2  26        102.67        158.80        13.82 o
  -1   2  26       1251.61       1296.06        33.05 o
   0   2  26          9.89        -10.28        12.47 o
   1   2  26       1248.33       1236.61        34.20 o
   2   2  26        101.80        138.45        16.07 o
   3   2  26         51.03         70.93        18.11 o
   4   2  26        398.20        466.83        30.15 o
   5   2  26        181.09        165.39        24.10 o
   6   2  26        170.35        124.20        41.40 o
  -5   3  26         55.67         61.60        23.75 o
  -4   3  26        215.49        234.16        19.49 o
  -3   3  26         75.17         74.35        12.08 o
  -2   3  26        240.58        342.93        18.33 o
  -1   3  26        420.90        436.60        23.19 o
   0   3  26         10.24         47.99        21.43 o
   1   3  26        419.66        421.24        28.18 o
   2   3  26        241.32        348.41        21.15 o
   3   3  26         75.64         53.88        14.68 o
   4   3  26        214.29        224.90        24.94 o
   5   3  26         54.88         65.96        21.35 o
   6   3  26         35.90         26.47        39.36 o
  -5   4  26        225.09        256.47        27.83 o
  -4   4  26        107.79        133.39        17.86 o
  -3   4  26        268.38        279.47        17.74 o
  -2   4  26         48.03         45.59        11.66 o
  -1   4  26        155.59        129.63        17.92 o
   0   4  26        230.02        235.54        19.54 o
   1   4  26        154.46        129.51        16.10 o
   2   4  26         47.74         67.09        15.18 o
   3   4  26        267.92        317.06        24.02 o
   4   4  26        110.65        146.82        24.04 o
   5   4  26        226.56        254.42        34.02 o
   6   4  26        115.50        111.30        45.47 o
  -5   5  26         24.26         30.34        19.40 o
  -4   5  26        300.38        267.59        23.07 o
  -3   5  26         29.93         15.54        14.76 o
  -2   5  26         47.81         30.11        12.10 o
  -1   5  26         23.47          8.03        13.50 o
   0   5  26        243.85        250.78        20.78 o
   1   5  26         23.33         19.55        14.67 o
   2   5  26         49.69         57.08        17.04 o
   3   5  26         29.47         30.51        19.63 o
   4   5  26        302.01        315.69        49.57 o
   5   5  26         24.05         30.05        31.28 o
  -4   6  26        216.95        238.40        28.01 o
  -3   6  26        180.76        218.76        22.17 o
  -2   6  26        417.02        418.21        29.55 o
  -1   6  26        339.62        331.68        25.58 o
   0   6  26       1125.16       1219.06        40.40 o
   1   6  26        340.51        330.48        28.64 o
   2   6  26        420.15        416.45        27.80 o
   3   6  26        180.50        194.81        26.15 o
   4   6  26        220.91        371.97        47.93 o
  -3   7  26         51.75         55.33        18.13 o
  -2   7  26         65.26         68.55        24.95 o
  -1   7  26        288.04        295.19        28.38 o
   0   7  26        253.18        248.72        26.94 o
   1   7  26        289.44        311.69        28.69 o
   2   7  26         63.72         58.84        31.63 o
   3   7  26         51.67         97.93        60.74 o
  -1   8  26         55.81         44.54        25.86 o
   0   8  26        105.18        108.58        34.39 o
   1   8  26         55.74        174.42        48.19 o
   1   0  27        181.58        233.83        16.16 o
   2   0  27        214.01        247.68        19.87 o
   3   0  27          2.56        -11.41        11.41 o
   4   0  27          6.12         29.61        18.35 o
   5   0  27         82.77         65.20        28.84 o
   6   0  27        215.94        210.39        42.76 o
  -6   1  27        108.80         66.51        35.97 o
  -5   1  27         79.50         89.23        27.49 o
  -4   1  27         73.52         47.77        12.72 o
  -3   1  27          1.13          3.03        12.29 o
  -2   1  27        384.07        417.04        19.32 o
  -1   1  27         51.15         47.21        18.82 o
   0   1  27          1.91         21.48        12.56 o
   1   1  27         51.55         46.98        12.47 o
   2   1  27        384.59        440.96        22.21 o
   3   1  27          1.20          0.42        15.53 o
   4   1  27         75.35         62.63        18.02 o
   5   1  27         79.89        122.56        30.65 o
   6   1  27        106.64         86.87        38.68 o
  -5   2  27        447.67        409.54        37.03 o
  -4   2  27        247.79        235.84        19.58 o
  -3   2  27        336.09        306.63        17.11 o
  -2   2  27        306.06        354.31        33.49 o
  -1   2  27        403.21        405.06        24.64 o
   0   2  27        217.13        234.28        18.88 o
   1   2  27        404.15        417.83        21.67 o
   2   2  27        305.24        377.36        21.45 o
   3   2  27        334.95        314.96        20.67 o
   4   2  27        245.80        276.00        25.23 o
   5   2  27        444.78        469.03        46.81 o
   6   2  27         76.88        111.30        42.08 o
  -5   3  27        199.26        134.38        40.04 o
  -4   3  27         96.87        121.28        17.87 o
  -3   3  27         49.75         30.35        16.78 o
  -2   3  27         16.53         29.07        14.62 o
  -1   3  27        142.29        153.04        20.34 o
   0   3  27        240.20        352.18        22.31 o
   1   3  27        142.39        151.73        16.17 o
   2   3  27         17.08         21.05        13.73 o
   3   3  27         49.98         37.70        26.23 o
   4   3  27         97.91        159.55        34.48 o
   5   3  27        199.33        132.34        44.11 o
  -5   4  27        200.96        177.81        39.36 o
  -4   4  27        631.94        724.75        57.01 o
  -3   4  27        268.00        227.76        27.45 o
  -2   4  27        133.96        119.41        14.14 o
  -1   4  27        377.70        420.32        28.21 o
   0   4  27        102.79        137.84        16.81 o
   1   4  27        378.66        397.64        27.55 o
   2   4  27        133.29        170.41        19.93 o
   3   4  27        268.29        273.60        26.47 o
   4   4  27        631.56        756.07        39.65 o
   5   4  27        202.52        162.20        46.83 o
  -4   5  27         11.07         30.02        20.09 o
  -3   5  27        148.47        162.70        20.34 o
  -2   5  27         67.62         48.95        16.73 o
  -1   5  27         66.90         37.99        20.84 o
   0   5  27         10.69         -6.74        14.94 o
   1   5  27         66.92         63.01        16.82 o
   2   5  27         67.64         62.47        17.06 o
   3   5  27        147.54        163.20        24.99 o
   4   5  27         10.91         91.80        34.44 o
  -3   6  27        244.17        240.98        23.14 o
  -2   6  27        213.49        254.34        29.63 o
  -1   6  27        206.83        246.45        25.55 o
   0   6  27         61.98         70.33        19.17 o
   1   6  27        207.69        223.12        25.11 o
   2   6  27        212.32        265.58        33.31 o
   3   6  27        243.61        308.81        39.71 o
  -2   7  27         57.25         53.84        45.13 o
  -1   7  27         37.12         55.20        20.00 o
   0   7  27        184.52        134.44        26.89 o
   1   7  27         37.24         81.84        22.82 o
   2   7  27         57.17         49.53        33.43 o
   0   0  28       1708.63       2550.27       182.63 o
   1   0  28         62.22         84.47        12.78 o
   2   0  28         16.07         11.52        11.23 o
   3   0  28        504.27        501.59        22.87 o
   4   0  28        222.95        224.83        27.88 o
   5   0  28          0.28          9.50        32.58 o
  -5   1  28         58.62         44.79        31.90 o
  -4   1  28         15.74         17.10        14.80 o
  -3   1  28        344.15        346.84        19.28 o
  -2   1  28        459.61        515.72        21.83 o
  -1   1  28        149.27        131.57        14.05 o
   0   1  28          5.49         12.09        12.37 o
   1   1  28        148.81        151.31        15.02 o
   2   1  28        451.51        496.15        25.85 o
   3   1  28        342.66        299.52        22.09 o
   4   1  28         15.22         31.80        25.30 o
   5   1  28         59.52         35.29        36.65 o
  -5   2  28        187.55        136.41        34.61 o
  -4   2  28         79.28         81.73        18.99 o
  -3   2  28          4.84          4.02        12.38 o
  -2   2  28         13.58         -1.03        11.37 o
  -1   2  28        119.24         89.87        13.49 o
   0   2  28         72.71         84.85        15.02 o
   1   2  28        119.51        104.05        15.01 o
   2   2  28         13.45         19.49        13.53 o
   3   2  28          4.87        -16.34        16.34 o
   4   2  28         76.84        139.70        22.65 o
   5   2  28        185.67        302.01        49.54 o
  -4   3  28         56.84         37.96        22.54 o
  -3   3  28         18.77          7.17        12.82 o
  -2   3  28        333.77        418.13        21.14 o
  -1   3  28        157.08        139.90        16.51 o
   0   3  28         35.91         39.08        19.51 o
   1   3  28        157.39        143.94        17.79 o
   2   3  28        338.49        385.80        22.79 o
   3   3  28         18.96         38.50        18.75 o
   4   3  28         58.40         48.03        21.72 o
  -4   4  28        128.35        105.21        23.51 o
  -3   4  28        317.57        337.85        33.85 o
  -2   4  28         38.32         48.63        14.36 o
  -1   4  28         49.86         41.25        14.59 o
   0   4  28          7.24         55.23        15.02 o
   1   4  28         49.73         55.40        15.52 o
   2   4  28         38.14         37.14        16.43 o
   3   4  28        318.43        304.16        39.28 o
   4   4  28        124.71        101.08        31.69 o
  -3   5  28        255.29        264.12        19.85 o
  -2   5  28        350.78        347.57        40.65 o
  -1   5  28         16.44         15.71        21.41 o
   0   5  28        180.98        176.73        21.80 o
   1   5  28         16.72         21.24        17.15 o
   2   5  28        356.27        356.73        35.97 o
   3   5  28        254.17        324.46        42.56 o
  -2   6  28        185.45        214.20        52.60 o
  -1   6  28         42.28         36.70        18.55 o
   0   6  28        404.13        537.94        36.89 o
   1   6  28         41.88         68.56        19.39 o
   2   6  28        183.77        242.26        50.56 o
   1   0  29         31.41         23.36        11.87 o
   2   0  29         92.61        123.25        14.80 o
   3   0  29        592.76        584.19        26.93 o
   4   0  29         67.75         -0.90        44.11 o
  -4   1  29        172.15        182.34        47.85 o
  -3   1  29         20.63         19.68        13.46 o
  -2   1  29         11.34          0.50        11.44 o
  -1   1  29         29.19         45.77        12.36 o
   0   1  29          3.65          9.16        12.18 o
   1   1  29         29.13          9.35        19.14 o
   2   1  29         11.38         22.74        13.27 o
   3   1  29         20.86         17.85        17.11 o
   4   1  29        175.89        203.87        42.42 o
  -4   2  29         17.81        -19.33        19.33 o
  -3   2  29        120.71        146.27        29.19 o
  -2   2  29        513.89        622.88        30.10 o
  -1   2  29        324.42        336.82        19.66 o
   0   2  29         64.17         76.42        16.46 o
   1   2  29        326.76        368.37        23.41 o
   2   2  29        514.00        564.46        25.81 o
   3   2  29        122.37        143.96        21.82 o
   4   2  29         17.22        -31.22        31.22 o
  -3   3  29         31.56         25.53        17.27 o
  -2   3  29        195.40        260.35        23.51 o
  -1   3  29         33.53         49.36        15.77 o
   0   3  29         18.12         41.99        16.25 o
   1   3  29         33.48         21.36        20.33 o
   2   3  29        195.70        245.94        22.17 o
   3   3  29         31.55         46.99        19.22 o
  -3   4  29        370.99        403.13        52.26 o
  -2   4  29        109.07        135.52        26.13 o
  -1   4  29         64.77         65.96        19.01 o
   0   4  29         14.30         48.02        17.01 o
   1   4  29         65.09         83.87        27.62 o
   2   4  29        108.08        166.98        24.38 o
   3   4  29        373.80        361.74        66.51 o
  -1   5  29        368.49        498.94        41.72 o
   0   5  29         18.69         14.57        23.12 o
   1   5  29        372.05        422.89        37.93 o
   0   0  30         33.75        162.59        23.26 o
   1   0  30        130.63        139.30        20.75 o
   2   0  30        407.13        320.52        23.09 o
   3   0  30          3.46          2.08        17.71 o
  -3   1  30         89.34        155.57        30.48 o
  -2   1  30         39.67         11.78        14.77 o
  -1   1  30        230.58        275.77        17.99 o
   0   1  30        108.88        129.69        16.06 o
   1   1  30        231.30        276.19        29.59 o
   2   1  30         38.07         13.66        17.32 o
   3   1  30         91.23         98.07        31.67 o
  -2   2  30        218.59        261.06        34.97 o
  -1   2  30         44.03         68.88        21.55 o
   0   2  30         51.97         65.28        16.07 o
   1   2  30         42.36         30.26        27.11 o
   2   2  30        219.58        262.30        31.35 o
  -1   3  30        102.38        101.20        19.64 o
   0   3  30         29.80         67.08        17.84 o
   1   3  30        102.05         71.86        18.75 o
                                                
