# Supplementary material for: Expanding the antibacterial selectivity of polyether ionophore antibiotics through diversity-focused semisynthesis
Source: Springer Nature journal article supplement (doi:10.1038/s41557-020-00601-1), 2020-12-22
Supplement: 41557_2020_601_MOESM83_ESM.mol [file 41557_2020_601_MOESM83_ESM.mol]

nchem.19061130C-comp32.mol
  ChemDraw11042002272D

 53 56  0  0  1  0  0  0  0  0999 V2000
   -2.9422    0.9975    0.0000 C   0  0  0  0  0  0  0  0  0  0  0  0
   -2.9422    0.1725    0.0000 C   0  0  0  0  0  0  0  0  0  0  0  0
   -2.2277   -0.2400    0.0000 O   0  0  0  0  0  0  0  0  0  0  0  0
   -1.5133    0.1725    0.0000 C   0  0  0  0  0  0  0  0  0  0  0  0
   -1.5133    0.9975    0.0000 C   0  0  0  0  0  0  0  0  0  0  0  0
   -2.2277    1.4100    0.0000 C   0  0  0  0  0  0  0  0  0  0  0  0
   -0.7988    1.4100    0.0000 C   0  0  0  0  0  0  0  0  0  0  0  0
   -3.6567    1.4100    0.0000 C   0  0  0  0  0  0  0  0  0  0  0  0
   -3.6567   -0.2400    0.0000 C   0  0  0  0  0  0  0  0  0  0  0  0
   -4.3712    0.1725    0.0000 C   0  0  0  0  0  0  0  0  0  0  0  0
   -0.7988   -0.2400    0.0000 C   0  0  0  0  0  0  0  0  0  0  0  0
   -0.7988   -1.0650    0.0000 C   0  0  0  0  0  0  0  0  0  0  0  0
   -0.0843    0.1725    0.0000 C   0  0  0  0  0  0  0  0  0  0  0  0
   -0.0843    0.9975    0.0000 O   0  0  0  0  0  0  0  0  0  0  0  0
    0.6301   -0.2400    0.0000 C   0  0  0  0  0  0  0  0  0  0  0  0
    0.6301   -1.0650    0.0000 C   0  0  0  0  0  0  0  0  0  0  0  0
   -4.3712    0.9975    0.0000 O   0  0  0  0  0  0  0  0  0  0  0  0
   -5.0856   -0.2400    0.0000 C   0  0  0  0  0  0  0  0  0  0  0  0
   -5.8393    0.0956    0.0000 C   0  0  0  0  0  0  0  0  0  0  0  0
   -6.3913   -0.5175    0.0000 C   0  0  0  0  0  0  0  0  0  0  0  0
   -5.9788   -1.2320    0.0000 O   0  0  0  0  0  0  0  0  0  0  0  0
   -5.1719   -1.0604    0.0000 C   0  0  0  0  0  0  0  0  0  0  0  0
   -6.0108    0.9026    0.0000 O   0  0  0  0  0  0  0  0  0  0  0  0
   -4.5588   -1.6125    0.0000 O   0  0  0  0  0  0  0  0  0  0  0  0
   -7.2118   -0.4313    0.0000 C   0  0  0  0  0  0  0  0  0  0  0  0
   -7.6967   -1.0987    0.0000 Cl  0  0  0  0  0  0  0  0  0  0  0  0
   -2.9422   -0.6525    0.0000 H   0  0  0  0  0  0  0  0  0  0  0  0
   -1.5133   -0.6525    0.0000 H   0  0  0  0  0  0  0  0  0  0  0  0
    1.3446    0.1725    0.0000 C   0  0  0  0  0  0  0  0  0  0  0  0
    1.3446    0.9975    0.0000 O   0  0  0  0  0  0  0  0  0  0  0  0
    2.0591   -0.2400    0.0000 C   0  0  0  0  0  0  0  0  0  0  0  0
    2.7736    0.1725    0.0000 C   0  0  0  0  0  0  0  0  0  0  0  0
    3.5272   -0.1630    0.0000 O   0  0  0  0  0  0  0  0  0  0  0  0
    4.0793    0.4501    0.0000 C   0  0  0  0  0  0  0  0  0  0  0  0
    3.6668    1.1645    0.0000 C   0  0  0  0  0  0  0  0  0  0  0  0
    2.8598    0.9930    0.0000 C   0  0  0  0  0  0  0  0  0  0  0  0
    2.9871   -0.6244    0.0000 H   0  0  0  0  0  0  0  0  0  0  0  0
    4.8997    0.3638    0.0000 C   0  0  0  0  0  0  0  0  0  0  0  0
    5.2353   -0.3898    0.0000 C   0  0  0  0  0  0  0  0  0  0  0  0
    6.0558   -0.4761    0.0000 C   0  0  0  0  0  0  0  0  0  0  0  0
    6.5407    0.1914    0.0000 C   0  0  0  0  0  0  0  0  0  0  0  0
    6.2051    0.9450    0.0000 C   0  0  0  0  0  0  0  0  0  0  0  0
    5.3847    1.0313    0.0000 O   0  0  0  0  0  0  0  0  0  0  0  0
    4.2928   -0.3468    0.0000 C   0  0  0  0  0  0  0  0  0  0  0  0
    4.6862    1.1607    0.0000 H   0  0  0  0  0  0  0  0  0  0  0  0
    3.7094   -0.9302    0.0000 C   0  0  0  0  0  0  0  0  0  0  0  0
    7.3612    0.1051    0.0000 C   0  0  0  0  0  0  0  0  0  0  0  0
    7.6967   -0.6485    0.0000 C   0  0  0  0  0  0  0  0  0  0  0  0
    6.9532   -0.5231    0.0000 O   0  0  0  0  0  0  0  0  0  0  0  0
    6.6901    1.6125    0.0000 C   0  0  0  0  0  0  0  0  0  0  0  0
    2.0591   -1.0650    0.0000 C   0  0  0  0  0  0  0  0  0  0  0  0
    2.7736   -1.4775    0.0000 C   0  0  0  0  0  0  0  0  0  0  0  0
    2.2467    1.5450    0.0000 C   0  0  0  0  0  0  0  0  0  0  0  0
  1  2  1  0      
  2  3  1  0      
  3  4  1  0      
  4  5  1  0      
  5  6  1  0      
  6  1  1  0      
  5  7  1  1      
  1  8  1  6      
  2  9  1  0      
  9 10  1  0      
  4 11  1  0      
 11 12  1  1      
 11 13  1  0      
 13 14  1  1      
 13 15  1  0      
 15 16  1  6      
 10 17  2  0      
 10 18  1  0      
 18 19  2  0      
 19 20  1  0      
 20 21  1  0      
 21 22  1  0      
 22 18  1  0      
 19 23  1  0      
 22 24  2  0      
 20 25  2  0      
 25 26  1  0      
  2 27  1  1      
  4 28  1  6      
 15 29  1  0      
 29 30  1  6      
 29 31  1  0      
 31 32  1  0      
 32 33  1  0      
 33 34  1  0      
 34 35  1  0      
 35 36  1  0      
 36 32  1  0      
 32 37  1  1      
 34 38  1  0      
 38 39  1  0      
 39 40  1  0      
 40 41  1  0      
 41 42  1  0      
 42 43  1  0      
 43 38  1  0      
 34 44  1  6      
 38 45  1  1      
 44 46  1  0      
 41 47  1  0      
 47 48  1  0      
 41 49  1  6      
 42 50  1  1      
 31 51  1  1      
 51 52  1  0      
 36 53  1  1      
M  END
